# Supplementary material
Source: Research Square preprint supplement (doi:10.21203/rs.3.rs-9446490/v1)
Supplement: Supplementary file 1 [file 28ca304d08ddb69938d0b06d.xlsx]

## Sheet: lsr2_regions_annotated
		Table S9 | Annotation of genomic regions encoding Lsr2 homologues. For each candidate, the table lists the genome ID, Lsr2 locus identifier, genomic start and end coordinates, protein accession number, and protein length (amino acids). Surrounding regions were analyzed for the presence of conjugative elements (ConjScan), defense-related proteins (DefenseFinder), and complete defense systems (anno…
genome_id	lsr2_region_id	region_start	region_end	locus_tag	gene_start	gene_end	protein_id	protein_size_aa	ConjScanProfiles	DefenseFinderProfiles	Complete_defense_type	geNomad_class	geNomad_description
ACSH02000004.1	ACSH02000004.1_HMPREF0299_7220	354	61757	HMPREF0299_7206	354	827	EFM49509.1	157	NA	NA	NA	NA	NA
ACSH02000004.1	ACSH02000004.1_HMPREF0299_7220	354	61757	HMPREF0299_7207	817	1836	EFM49297.1	339	NA	NA	NA	NA	NA
ACSH02000004.1	ACSH02000004.1_HMPREF0299_7220	354	61757	HMPREF0299_7208	1905	2069	EFM49545.1	54	NA	NA	NA	NA	NA
ACSH02000004.1	ACSH02000004.1_HMPREF0299_7220	354	61757	HMPREF0299_7209	2196	3152	EFM49302.1	318	NA	NA	NA	NA	NA
ACSH02000004.1	ACSH02000004.1_HMPREF0299_7220	354	61757	HMPREF0299_7210	3718	3978	EFM49532.1	86	NA	NA	NA	NA	NA
ACSH02000004.1	ACSH02000004.1_HMPREF0299_7220	354	61757	HMPREF0299_7211	4003	4245	EFM49592.1	80	NA	aca6	NA	NA	NA
ACSH02000004.1	ACSH02000004.1_HMPREF0299_7220	354	61757	HMPREF0299_7212	4389	5033	EFM49396.1	214	NA	NA	NA	NA	NA
ACSH02000004.1	ACSH02000004.1_HMPREF0299_7220	354	61757	HMPREF0299_7213	5021	6181	EFM49508.1	386	NA	NA	NA	NA	NA
ACSH02000004.1	ACSH02000004.1_HMPREF0299_7220	354	61757	HMPREF0299_7214	6239	7093	EFM49316.1	284	NA	NA	NA	NA	NA
ACSH02000004.1	ACSH02000004.1_HMPREF0299_7220	354	61757	HMPREF0299_7215	7116	7268	EFM49359.1	50	NA	NA	NA	NA	NA
ACSH02000004.1	ACSH02000004.1_HMPREF0299_7220	354	61757	HMPREF0299_7216	7867	8862	EFM49489.1	331	NA	AbiEii__AbiEi_1	NA	NA	NA
ACSH02000004.1	ACSH02000004.1_HMPREF0299_7220	354	61757	HMPREF0299_7217	8946	9533	EFM49586.1	195	NA	NA	NA	NA	NA
ACSH02000004.1	ACSH02000004.1_HMPREF0299_7220	354	61757	HMPREF0299_7218	9566	10804	EFM49300.1	412	NA	NA	NA	NA	NA
ACSH02000004.1	ACSH02000004.1_HMPREF0299_7220	354	61757	HMPREF0299_7219	10858	11496	EFM49338.1	212	NA	Detocs__dtcB	NA	NA	NA
ACSH02000004.1	ACSH02000004.1_HMPREF0299_7220	354	61757	HMPREF0299_7220	11630	11968	EFM49665.1	112	NA	NA	NA	NA	NA
ACSH02000004.1	ACSH02000004.1_HMPREF0299_7220	354	61757	HMPREF0299_7221	12457	13086	EFM49364.1	209	NA	NA	NA	NA	NA
ACSH02000004.1	ACSH02000004.1_HMPREF0299_7220	354	61757	HMPREF0299_7222	13177	14685	EFM49615.1	502	NA	NA	NA	NA	NA
ACSH02000004.1	ACSH02000004.1_HMPREF0299_7220	354	61757	HMPREF0299_7223	14699	15403	EFM49340.1	234	NA	NA	NA	NA	NA
ACSH02000004.1	ACSH02000004.1_HMPREF0299_7220	354	61757	HMPREF0299_7224	15663	16268	EFM49664.1	201	NA	NA	NA	NA	NA
ACSH02000004.1	ACSH02000004.1_HMPREF0299_7220	354	61757	HMPREF0299_7225	16397	18190	EFM49534.1	597	NA	NA	NA	NA	NA
ACSH02000004.1	ACSH02000004.1_HMPREF0299_7220	354	61757	HMPREF0299_7226	18177	18851	EFM49609.1	224	NA	gcu167__gcu167B	NA	NA	NA
ACSH02000004.1	ACSH02000004.1_HMPREF0299_7220	354	61757	HMPREF0299_7227	19086	19517	EFM49387.1	143	NA	NA	NA	NA	NA
ACSH02000004.1	ACSH02000004.1_HMPREF0299_7220	354	61757	HMPREF0299_7228	20307	21059	EFM49604.1	250	NA	NA	NA	NA	NA
ACSH02000004.1	ACSH02000004.1_HMPREF0299_7220	354	61757	HMPREF0299_7229	21128	21334	EFM49671.1	68	NA	NA	NA	NA	NA
ACSH02000004.1	ACSH02000004.1_HMPREF0299_7220	354	61757	HMPREF0299_7231	21574	22569	EFM49410.1	331	NA	NA	NA	NA	NA
ACSH02000004.1	ACSH02000004.1_HMPREF0299_7220	354	61757	HMPREF0299_7232	22583	23041	EFM49400.1	152	NA	NA	NA	NA	NA
ACSH02000004.1	ACSH02000004.1_HMPREF0299_7220	354	61757	HMPREF0299_7233	23061	25409	EFM49593.1	782	NA	NA	NA	NA	NA
ACSH02000004.1	ACSH02000004.1_HMPREF0299_7220	354	61757	HMPREF0299_7234	25597	25938	EFM49572.1	113	NA	NA	NA	NA	NA
ACSH02000004.1	ACSH02000004.1_HMPREF0299_7220	354	61757	HMPREF0299_7235	26007	26165	EFM49445.1	52	NA	NA	NA	NA	NA
ACSH02000004.1	ACSH02000004.1_HMPREF0299_7220	354	61757	HMPREF0299_7236	26162	26614	EFM49655.1	150	NA	NA	NA	NA	NA
ACSH02000004.1	ACSH02000004.1_HMPREF0299_7220	354	61757	HMPREF0299_7237	26661	27467	EFM49506.1	268	NA	NA	NA	NA	NA
ACSH02000004.1	ACSH02000004.1_HMPREF0299_7220	354	61757	HMPREF0299_7238	27535	28218	EFM49393.1	227	NA	CBASS__Effector_TIR	NA	NA	NA
ACSH02000004.1	ACSH02000004.1_HMPREF0299_7220	354	61757	HMPREF0299_7239	28702	29250	EFM49328.1	182	NA	NA	NA	NA	NA
ACSH02000004.1	ACSH02000004.1_HMPREF0299_7220	354	61757	HMPREF0299_7240	29247	29993	EFM49528.1	248	NA	NA	NA	NA	NA
ACSH02000004.1	ACSH02000004.1_HMPREF0299_7220	354	61757	HMPREF0299_7241	30017	31222	EFM49514.1	401	NA	NA	NA	NA	NA
ACSH02000004.1	ACSH02000004.1_HMPREF0299_7220	354	61757	HMPREF0299_7242	31219	32412	EFM49305.1	397	NA	NA	NA	NA	NA
ACSH02000004.1	ACSH02000004.1_HMPREF0299_7220	354	61757	HMPREF0299_7243	32556	33473	EFM49354.1	305	NA	NA	NA	NA	NA
ACSH02000004.1	ACSH02000004.1_HMPREF0299_7220	354	61757	HMPREF0299_7244	33486	33971	EFM49683.1	161	NA	NA	NA	NA	NA
ACSH02000004.1	ACSH02000004.1_HMPREF0299_7220	354	61757	HMPREF0299_7245	34096	34797	EFM49304.1	233	NA	NA	NA	NA	NA
ACSH02000004.1	ACSH02000004.1_HMPREF0299_7220	354	61757	HMPREF0299_7246	34794	35591	EFM49614.1	265	NA	NA	NA	NA	NA
ACSH02000004.1	ACSH02000004.1_HMPREF0299_7220	354	61757	HMPREF0299_7247	35843	36031	EFM49681.1	62	NA	NA	NA	NA	NA
ACSH02000004.1	ACSH02000004.1_HMPREF0299_7220	354	61757	HMPREF0299_7248	36028	37092	EFM49515.1	354	NA	NA	NA	NA	NA
ACSH02000004.1	ACSH02000004.1_HMPREF0299_7220	354	61757	HMPREF0299_7249	37093	38241	EFM49458.1	382	T_virB11	NA	NA	NA	NA
ACSH02000004.1	ACSH02000004.1_HMPREF0299_7220	354	61757	HMPREF0299_7250	38238	39110	EFM49265.1	290	NA	NA	NA	NA	NA
ACSH02000004.1	ACSH02000004.1_HMPREF0299_7220	354	61757	HMPREF0299_7251	39140	39658	EFM49341.1	172	NA	NA	NA	NA	NA
ACSH02000004.1	ACSH02000004.1_HMPREF0299_7220	354	61757	HMPREF0299_7252	39680	39931	EFM49453.1	83	NA	NA	NA	NA	NA
ACSH02000004.1	ACSH02000004.1_HMPREF0299_7220	354	61757	HMPREF0299_7253	39937	40242	EFM49289.1	101	NA	NA	NA	NA	NA
ACSH02000004.1	ACSH02000004.1_HMPREF0299_7220	354	61757	HMPREF0299_7254	40239	40568	EFM49539.1	109	NA	NA	NA	NA	NA
ACSH02000004.1	ACSH02000004.1_HMPREF0299_7220	354	61757	HMPREF0299_7255	40565	43003	EFM49578.1	812	NA	Shango__SngC	NA	NA	NA
ACSH02000004.1	ACSH02000004.1_HMPREF0299_7220	354	61757	HMPREF0299_7256	43292	43498	EFM49416.1	68	NA	NA	NA	NA	NA
ACSH02000004.1	ACSH02000004.1_HMPREF0299_7220	354	61757	HMPREF0299_7257	43713	46673	EFM49366.1	986	NA	NA	NA	NA	NA
ACSH02000004.1	ACSH02000004.1_HMPREF0299_7220	354	61757	HMPREF0299_7258	46682	47908	EFM49654.1	408	NA	NA	NA	NA	NA
ACSH02000004.1	ACSH02000004.1_HMPREF0299_7220	354	61757	HMPREF0299_7259	48005	49348	EFM49447.1	447	NA	AbiEii__AbiEii	NA	NA	NA
ACSH02000004.1	ACSH02000004.1_HMPREF0299_7220	354	61757	HMPREF0299_7260	49354	50031	EFM49582.1	225	NA	NA	NA	NA	NA
ACSH02000004.1	ACSH02000004.1_HMPREF0299_7220	354	61757	HMPREF0299_7261	50926	51717	EFM49319.1	263	NA	NA	NA	NA	NA
ACSH02000004.1	ACSH02000004.1_HMPREF0299_7220	354	61757	HMPREF0299_7262	51714	52277	EFM49283.1	187	NA	NA	NA	NA	NA
ACSH02000004.1	ACSH02000004.1_HMPREF0299_7220	354	61757	HMPREF0299_7263	52329	52586	EFM49411.1	85	NA	NA	NA	NA	NA
ACSH02000004.1	ACSH02000004.1_HMPREF0299_7220	354	61757	HMPREF0299_7264	52730	54319	EFM49482.1	529	NA	NA	NA	NA	NA
ACSH02000004.1	ACSH02000004.1_HMPREF0299_7220	354	61757	HMPREF0299_7265	54428	55381	EFM49589.1	317	NA	NA	NA	NA	NA
ACSH02000004.1	ACSH02000004.1_HMPREF0299_7220	354	61757	HMPREF0299_7266	55716	56192	EFM49702.1	158	NA	NA	NA	NA	NA
ACSH02000004.1	ACSH02000004.1_HMPREF0299_7220	354	61757	HMPREF0299_7267	56559	57113	EFM49376.1	184	NA	NA	NA	NA	NA
ACSH02000004.1	ACSH02000004.1_HMPREF0299_7220	354	61757	HMPREF0299_7268	57223	57537	EFM49406.1	104	NA	NA	NA	NA	NA
ACSH02000004.1	ACSH02000004.1_HMPREF0299_7220	354	61757	HMPREF0299_7269	57820	58911	EFM49512.1	363	NA	NA	NA	NA	NA
ACSH02000004.1	ACSH02000004.1_HMPREF0299_7220	354	61757	HMPREF0299_7270	58953	59318	EFM49402.1	121	NA	NA	NA	NA	NA
ACSH02000004.1	ACSH02000004.1_HMPREF0299_7220	354	61757	HMPREF0299_7271	60579	61757	EFM49436.1	392	NA	NA	NA	NA	NA
ACVP01000005.1	ACVP01000005.1_CORTU0001_2113	317	67923	CORTU0001_2103	317	1267	EET78080.1	316	NA	NA	NA	NA	NA
ACVP01000005.1	ACVP01000005.1_CORTU0001_2113	317	67923	CORTU0001_2104	1308	1451	EET78081.1	47	NA	NA	NA	NA	NA
ACVP01000005.1	ACVP01000005.1_CORTU0001_2113	317	67923	CORTU0001_2105	1493	2392	EET78082.1	299	NA	NA	NA	NA	NA
ACVP01000005.1	ACVP01000005.1_CORTU0001_2113	317	67923	CORTU0001_2106	2513	2761	EET78083.1	82	NA	NA	NA	NA	NA
ACVP01000005.1	ACVP01000005.1_CORTU0001_2113	317	67923	CORTU0001_2108	2840	3448	EET78084.1	202	NA	NA	NA	NA	NA
ACVP01000005.1	ACVP01000005.1_CORTU0001_2113	317	67923	CORTU0001_2107	3405	4349	EET78085.1	314	NA	NA	NA	NA	NA
ACVP01000005.1	ACVP01000005.1_CORTU0001_2113	317	67923	CORTU0001_2109	4383	5045	EET78086.1	220	NA	NA	NA	NA	NA
ACVP01000005.1	ACVP01000005.1_CORTU0001_2113	317	67923	CORTU0001_2111	5045	5197	EET78087.1	50	NA	NA	NA	NA	NA
ACVP01000005.1	ACVP01000005.1_CORTU0001_2113	317	67923	CORTU0001_2110	5194	5601	EET78088.1	135	NA	NA	NA	NA	NA
ACVP01000005.1	ACVP01000005.1_CORTU0001_2113	317	67923	CORTU0001_2112	5729	6892	EET78089.1	387	NA	NA	NA	NA	NA
ACVP01000005.1	ACVP01000005.1_CORTU0001_2113	317	67923	CORTU0001_2114	6930	7568	EET78090.1	212	NA	Detocs__dtcB	NA	NA	NA
ACVP01000005.1	ACVP01000005.1_CORTU0001_2113	317	67923	CORTU0001_2113	7565	7909	EET78091.1	114	NA	NA	NA	NA	NA
ACVP01000005.1	ACVP01000005.1_CORTU0001_2113	317	67923	CORTU0001_2115	8065	8697	EET78092.1	210	NA	NA	NA	NA	NA
ACVP01000005.1	ACVP01000005.1_CORTU0001_2113	317	67923	CORTU0001_2117	8842	10200	EET78093.1	452	NA	NA	NA	NA	NA
ACVP01000005.1	ACVP01000005.1_CORTU0001_2113	317	67923	CORTU0001_2116	10187	11485	EET78094.1	432	NA	NA	NA	NA	NA
ACVP01000005.1	ACVP01000005.1_CORTU0001_2113	317	67923	CORTU0001_2118	11496	12647	EET78095.1	383	NA	NA	NA	NA	NA
ACVP01000005.1	ACVP01000005.1_CORTU0001_2113	317	67923	CORTU0001_2119	12719	13573	EET78096.1	284	NA	NA	NA	NA	NA
ACVP01000005.1	ACVP01000005.1_CORTU0001_2113	317	67923	CORTU0001_2120	13616	14218	EET78097.1	200	NA	NA	NA	NA	NA
ACVP01000005.1	ACVP01000005.1_CORTU0001_2113	317	67923	CORTU0001_2122	14383	15030	EET78098.1	215	NA	NA	NA	NA	NA
ACVP01000005.1	ACVP01000005.1_CORTU0001_2113	317	67923	CORTU0001_2121	15027	16769	EET78099.1	580	NA	NA	NA	NA	NA
ACVP01000005.1	ACVP01000005.1_CORTU0001_2113	317	67923	CORTU0001_2123	16857	17804	EET78100.1	315	NA	NA	NA	NA	NA
ACVP01000005.1	ACVP01000005.1_CORTU0001_2113	317	67923	CORTU0001_2124	17804	18508	EET78101.1	234	NA	NA	NA	NA	NA
ACVP01000005.1	ACVP01000005.1_CORTU0001_2113	317	67923	CORTU0001_2125	18529	19449	EET78102.1	306	NA	NA	NA	NA	NA
ACVP01000005.1	ACVP01000005.1_CORTU0001_2113	317	67923	CORTU0001_2126	19500	20744	EET78103.1	414	NA	NA	NA	NA	NA
ACVP01000005.1	ACVP01000005.1_CORTU0001_2113	317	67923	CORTU0001_2127	20421	20735	EET78104.1	104	NA	NA	NA	NA	NA
ACVP01000005.1	ACVP01000005.1_CORTU0001_2113	317	67923	CORTU0001_2128	20807	21505	EET78105.1	232	NA	NA	NA	NA	NA
ACVP01000005.1	ACVP01000005.1_CORTU0001_2113	317	67923	CORTU0001_2129	21502	22638	EET78106.1	378	NA	NA	NA	NA	NA
ACVP01000005.1	ACVP01000005.1_CORTU0001_2113	317	67923	CORTU0001_2130	22672	23568	EET78107.1	298	NA	NA	NA	NA	NA
ACVP01000005.1	ACVP01000005.1_CORTU0001_2113	317	67923	CORTU0001_2132	23578	24231	EET78108.1	217	NA	NA	NA	NA	NA
ACVP01000005.1	ACVP01000005.1_CORTU0001_2113	317	67923	CORTU0001_2131	24228	24575	EET78109.1	115	NA	NA	NA	NA	NA
ACVP01000005.1	ACVP01000005.1_CORTU0001_2113	317	67923	CORTU0001_2133	24575	25648	EET78110.1	357	NA	NA	NA	NA	NA
ACVP01000005.1	ACVP01000005.1_CORTU0001_2113	317	67923	CORTU0001_2134	25685	26434	EET78111.1	249	NA	AbiEii__AbiEi_4	NA	NA	NA
ACVP01000005.1	ACVP01000005.1_CORTU0001_2113	317	67923	CORTU0001_2135	26500	27756	EET78112.1	418	NA	NA	NA	NA	NA
ACVP01000005.1	ACVP01000005.1_CORTU0001_2113	317	67923	CORTU0001_2136	27780	29393	EET78113.1	537	NA	NA	NA	NA	NA
ACVP01000005.1	ACVP01000005.1_CORTU0001_2113	317	67923	CORTU0001_2138	29691	31415	EET78114.1	574	NA	NA	NA	NA	NA
ACVP01000005.1	ACVP01000005.1_CORTU0001_2113	317	67923	CORTU0001_2139	31419	32156	EET78115.1	245	NA	NA	NA	NA	NA
ACVP01000005.1	ACVP01000005.1_CORTU0001_2113	317	67923	CORTU0001_2140	32185	33732	EET78116.1	515	NA	NA	NA	NA	NA
ACVP01000005.1	ACVP01000005.1_CORTU0001_2113	317	67923	CORTU0001_2142	33755	34585	EET78117.1	276	NA	NA	NA	NA	NA
ACVP01000005.1	ACVP01000005.1_CORTU0001_2113	317	67923	CORTU0001_2141	34582	36480	EET78118.1	632	NA	NA	NA	NA	NA
ACVP01000005.1	ACVP01000005.1_CORTU0001_2113	317	67923	CORTU0001_2143	36627	37823	EET78119.1	398	NA	NA	NA	NA	NA
ACVP01000005.1	ACVP01000005.1_CORTU0001_2113	317	67923	CORTU0001_2144	37864	38052	EET78120.1	62	NA	NA	NA	NA	NA
ACVP01000005.1	ACVP01000005.1_CORTU0001_2113	317	67923	CORTU0001_2146	38129	38716	EET78121.1	195	NA	NA	NA	NA	NA
ACVP01000005.1	ACVP01000005.1_CORTU0001_2113	317	67923	CORTU0001_2145	38713	39975	EET78122.1	420	NA	NA	NA	NA	NA
ACVP01000005.1	ACVP01000005.1_CORTU0001_2113	317	67923	CORTU0001_2147	40082	42034	EET78123.1	650	NA	NA	NA	NA	NA
ACVP01000005.1	ACVP01000005.1_CORTU0001_2113	317	67923	CORTU0001_2148	42024	42539	EET78124.1	171	NA	NA	NA	NA	NA
ACVP01000005.1	ACVP01000005.1_CORTU0001_2113	317	67923	CORTU0001_2149	42532	43512	EET78125.1	326	NA	NA	NA	NA	NA
ACVP01000005.1	ACVP01000005.1_CORTU0001_2113	317	67923	CORTU0001_2150	43623	45260	EET78126.1	545	NA	NA	NA	NA	NA
ACVP01000005.1	ACVP01000005.1_CORTU0001_2113	317	67923	CORTU0001_2151	45398	46411	EET78127.1	337	NA	NA	NA	NA	NA
ACVP01000005.1	ACVP01000005.1_CORTU0001_2113	317	67923	CORTU0001_2152	46572	47717	EET78128.1	381	NA	NA	NA	NA	NA
ACVP01000005.1	ACVP01000005.1_CORTU0001_2113	317	67923	CORTU0001_2153	47739	49139	EET78129.1	466	NA	NA	NA	NA	NA
ACVP01000005.1	ACVP01000005.1_CORTU0001_2113	317	67923	CORTU0001_2154	49276	51222	EET78130.1	648	NA	NA	NA	NA	NA
ACVP01000005.1	ACVP01000005.1_CORTU0001_2113	317	67923	CORTU0001_2155	51225	51656	EET78131.1	143	NA	NA	NA	NA	NA
ACVP01000005.1	ACVP01000005.1_CORTU0001_2113	317	67923	CORTU0001_2156	51679	52593	EET78132.1	304	NA	NA	NA	NA	NA
ACVP01000005.1	ACVP01000005.1_CORTU0001_2113	317	67923	CORTU0001_2157	52653	54365	EET78133.1	570	NA	NA	NA	NA	NA
ACVP01000005.1	ACVP01000005.1_CORTU0001_2113	317	67923	CORTU0001_2158	54445	59151	EET78134.1	1568	NA	NA	NA	NA	NA
ACVP01000005.1	ACVP01000005.1_CORTU0001_2113	317	67923	CORTU0001_2159	59126	60682	EET78135.1	518	NA	NA	NA	NA	NA
ACVP01000005.1	ACVP01000005.1_CORTU0001_2113	317	67923	CORTU0001_2161	60871	61200	EET78136.1	109	NA	NA	NA	NA	NA
ACVP01000005.1	ACVP01000005.1_CORTU0001_2113	317	67923	CORTU0001_2162	61197	62213	EET78137.1	338	NA	NA	NA	CP	Uncharacterized membrane protein YbhN, UPF0104 family
ACVP01000005.1	ACVP01000005.1_CORTU0001_2113	317	67923	CORTU0001_2163	62214	64367	EET78138.1	717	NA	NA	NA	NA	NA
ACVP01000005.1	ACVP01000005.1_CORTU0001_2113	317	67923	CORTU0001_2164	64380	64973	EET78139.1	197	NA	NA	NA	CP	TIGR00288 family protein
ACVP01000005.1	ACVP01000005.1_CORTU0001_2113	317	67923	CORTU0001_2165	64974	65750	EET78140.1	258	NA	NA	NA	NA	NA
ACVP01000005.1	ACVP01000005.1_CORTU0001_2113	317	67923	CORTU0001_2166	66100	67923	EET78141.1	607	NA	NA	NA	NA	NA
AMEM01000040.1	AMEM01000040.1_HMPREF9997_02385	404	72812	HMPREF9997_02368	404	2758	EKX88005.1	784	NA	NA	NA	NA	NA
AMEM01000040.1	AMEM01000040.1_HMPREF9997_02385	404	72812	HMPREF9997_02369	2773	4599	EKX88006.1	608	NA	NA	NA	NA	NA
AMEM01000040.1	AMEM01000040.1_HMPREF9997_02385	404	72812	HMPREF9997_02370	4624	5109	EKX88007.1	161	NA	NA	NA	NA	NA
AMEM01000040.1	AMEM01000040.1_HMPREF9997_02385	404	72812	HMPREF9997_02371	5112	5558	EKX88008.1	148	NA	NA	NA	NA	NA
AMEM01000040.1	AMEM01000040.1_HMPREF9997_02385	404	72812	HMPREF9997_02372	5759	8353	EKX88009.1	864	NA	NA	NA	NA	NA
AMEM01000040.1	AMEM01000040.1_HMPREF9997_02385	404	72812	HMPREF9997_02373	8384	9082	EKX88010.1	232	NA	NA	NA	NA	NA
AMEM01000040.1	AMEM01000040.1_HMPREF9997_02385	404	72812	HMPREF9997_02374	9121	9240	EKX88011.1	39	NA	NA	NA	NA	NA
AMEM01000040.1	AMEM01000040.1_HMPREF9997_02385	404	72812	HMPREF9997_02375	9306	10211	EKX88012.1	301	NA	NA	NA	NA	NA
AMEM01000040.1	AMEM01000040.1_HMPREF9997_02385	404	72812	HMPREF9997_02376	10342	10485	EKX88013.1	47	NA	NA	NA	NA	NA
AMEM01000040.1	AMEM01000040.1_HMPREF9997_02385	404	72812	HMPREF9997_02377	10676	11584	EKX88014.1	302	NA	NA	NA	NA	NA
AMEM01000040.1	AMEM01000040.1_HMPREF9997_02385	404	72812	HMPREF9997_02378	11715	12359	EKX88015.1	214	NA	NA	NA	NA	NA
AMEM01000040.1	AMEM01000040.1_HMPREF9997_02385	404	72812	HMPREF9997_02379	12356	13597	EKX88016.1	413	NA	NA	NA	NA	NA
AMEM01000040.1	AMEM01000040.1_HMPREF9997_02385	404	72812	HMPREF9997_02380	13741	14538	EKX88017.1	265	NA	NA	NA	NA	NA
AMEM01000040.1	AMEM01000040.1_HMPREF9997_02385	404	72812	HMPREF9997_02381	14539	14691	EKX88018.1	50	NA	NA	NA	NA	NA
AMEM01000040.1	AMEM01000040.1_HMPREF9997_02385	404	72812	HMPREF9997_02382	14705	15157	EKX88019.1	150	NA	NA	NA	NA	NA
AMEM01000040.1	AMEM01000040.1_HMPREF9997_02385	404	72812	HMPREF9997_02383	15278	16459	EKX88020.1	393	NA	NA	NA	NA	NA
AMEM01000040.1	AMEM01000040.1_HMPREF9997_02385	404	72812	HMPREF9997_02384	16503	17153	EKX88021.1	216	NA	Detocs__dtcB	NA	NA	NA
AMEM01000040.1	AMEM01000040.1_HMPREF9997_02385	404	72812	HMPREF9997_02385	17297	17662	EKX88022.1	121	NA	NA	NA	NA	NA
AMEM01000040.1	AMEM01000040.1_HMPREF9997_02385	404	72812	HMPREF9997_02386	18282	18941	EKX88023.1	219	NA	NA	NA	NA	NA
AMEM01000040.1	AMEM01000040.1_HMPREF9997_02385	404	72812	HMPREF9997_02387	19055	20590	EKX88024.1	511	NA	NA	NA	NA	NA
AMEM01000040.1	AMEM01000040.1_HMPREF9997_02385	404	72812	HMPREF9997_02389	20643	21338	EKX88026.1	231	NA	NA	NA	NA	NA
AMEM01000040.1	AMEM01000040.1_HMPREF9997_02385	404	72812	HMPREF9997_02388	21337	21999	EKX88025.1	220	NA	NA	NA	NA	NA
AMEM01000040.1	AMEM01000040.1_HMPREF9997_02385	404	72812	HMPREF9997_02390	22013	22549	EKX88027.1	178	NA	gcu233__gcu233	NA	NA	NA
AMEM01000040.1	AMEM01000040.1_HMPREF9997_02385	404	72812	HMPREF9997_02391	22577	22711	EKX88028.1	44	NA	NA	NA	NA	NA
AMEM01000040.1	AMEM01000040.1_HMPREF9997_02385	404	72812	HMPREF9997_02392	22720	23403	EKX88029.1	227	NA	gcu167__gcu167B	NA	NA	NA
AMEM01000040.1	AMEM01000040.1_HMPREF9997_02385	404	72812	HMPREF9997_02393	23718	23945	EKX88030.1	75	NA	NA	NA	NA	NA
AMEM01000040.1	AMEM01000040.1_HMPREF9997_02385	404	72812	HMPREF9997_02394	23967	24086	EKX88031.1	39	NA	NA	NA	NA	NA
AMEM01000040.1	AMEM01000040.1_HMPREF9997_02385	404	72812	HMPREF9997_02395	24300	24434	EKX88032.1	44	NA	NA	NA	NA	NA
AMEM01000040.1	AMEM01000040.1_HMPREF9997_02385	404	72812	HMPREF9997_02396	24424	25404	EKX88033.1	326	NA	NA	NA	NA	NA
AMEM01000040.1	AMEM01000040.1_HMPREF9997_02385	404	72812	HMPREF9997_02397	25541	26254	EKX88034.1	237	NA	NA	NA	NA	NA
AMEM01000040.1	AMEM01000040.1_HMPREF9997_02385	404	72812	HMPREF9997_02398	26275	27189	EKX88035.1	304	NA	NA	NA	NA	NA
AMEM01000040.1	AMEM01000040.1_HMPREF9997_02385	404	72812	HMPREF9997_02399	27186	27398	EKX88036.1	70	NA	NA	NA	NA	NA
AMEM01000040.1	AMEM01000040.1_HMPREF9997_02385	404	72812	HMPREF9997_02400	27455	28321	EKX88037.1	288	NA	NA	NA	NA	NA
AMEM01000040.1	AMEM01000040.1_HMPREF9997_02385	404	72812	HMPREF9997_02401	28724	29482	EKX88038.1	252	NA	NA	NA	NA	NA
AMEM01000040.1	AMEM01000040.1_HMPREF9997_02385	404	72812	HMPREF9997_02402	29479	30735	EKX88039.1	418	NA	NA	NA	NA	NA
AMEM01000040.1	AMEM01000040.1_HMPREF9997_02385	404	72812	HMPREF9997_02403	30768	31718	EKX88040.1	316	NA	NA	NA	NA	NA
AMEM01000040.1	AMEM01000040.1_HMPREF9997_02385	404	72812	HMPREF9997_02404	31715	32374	EKX88041.1	219	NA	NA	NA	NA	NA
AMEM01000040.1	AMEM01000040.1_HMPREF9997_02385	404	72812	HMPREF9997_02405	32397	32744	EKX88042.1	115	NA	NA	NA	NA	NA
AMEM01000040.1	AMEM01000040.1_HMPREF9997_02385	404	72812	HMPREF9997_02406	32769	33782	EKX88043.1	337	NA	NA	NA	NA	NA
AMEM01000040.1	AMEM01000040.1_HMPREF9997_02385	404	72812	HMPREF9997_02407	33850	34692	EKX88044.1	280	NA	NA	NA	NA	NA
AMEM01000040.1	AMEM01000040.1_HMPREF9997_02385	404	72812	HMPREF9997_02408	34739	34858	EKX88045.1	39	NA	NA	NA	NA	NA
AMEM01000040.1	AMEM01000040.1_HMPREF9997_02385	404	72812	HMPREF9997_02409	34869	36134	EKX88046.1	421	NA	NA	NA	NA	NA
AMEM01000040.1	AMEM01000040.1_HMPREF9997_02385	404	72812	HMPREF9997_02410	36127	36987	EKX88047.1	286	NA	NA	NA	NA	NA
AMEM01000040.1	AMEM01000040.1_HMPREF9997_02385	404	72812	HMPREF9997_02411	36984	37793	EKX88048.1	269	NA	acriia24	NA	NA	NA
AMEM01000040.1	AMEM01000040.1_HMPREF9997_02385	404	72812	HMPREF9997_02412	37856	39679	EKX88049.1	607	NA	NA	NA	NA	NA
AMEM01000040.1	AMEM01000040.1_HMPREF9997_02385	404	72812	HMPREF9997_02413	39820	39987	EKX88050.1	55	NA	NA	NA	NA	NA
AMEM01000040.1	AMEM01000040.1_HMPREF9997_02385	404	72812	HMPREF9997_02414	40062	41246	EKX88051.1	394	NA	NA	NA	NA	NA
AMEM01000040.1	AMEM01000040.1_HMPREF9997_02385	404	72812	HMPREF9997_02415	41455	43548	EKX88052.1	697	NA	NA	NA	NA	NA
AMEM01000040.1	AMEM01000040.1_HMPREF9997_02385	404	72812	HMPREF9997_02416	43891	45360	EKX88053.1	489	NA	NA	NA	NA	NA
AMEM01000040.1	AMEM01000040.1_HMPREF9997_02385	404	72812	HMPREF9997_02417	45479	47419	EKX88054.1	646	NA	NA	NA	NA	NA
AMEM01000040.1	AMEM01000040.1_HMPREF9997_02385	404	72812	HMPREF9997_02418	47634	47753	EKX88055.1	39	NA	NA	NA	NA	NA
AMEM01000040.1	AMEM01000040.1_HMPREF9997_02385	404	72812	HMPREF9997_02419	47784	49802	EKX88056.1	672	NA	NA	NA	NA	NA
AMEM01000040.1	AMEM01000040.1_HMPREF9997_02385	404	72812	HMPREF9997_02420	49802	50317	EKX88057.1	171	NA	NA	NA	NA	NA
AMEM01000040.1	AMEM01000040.1_HMPREF9997_02385	404	72812	HMPREF9997_02421	50318	51304	EKX88058.1	328	NA	NA	NA	NA	NA
AMEM01000040.1	AMEM01000040.1_HMPREF9997_02385	404	72812	HMPREF9997_02422	51341	51478	EKX88059.1	45	NA	NA	NA	NA	NA
AMEM01000040.1	AMEM01000040.1_HMPREF9997_02385	404	72812	HMPREF9997_02423	51517	52551	EKX88060.1	344	NA	NA	NA	NA	NA
AMEM01000040.1	AMEM01000040.1_HMPREF9997_02385	404	72812	HMPREF9997_02424	53078	54976	EKX88061.1	632	NA	NA	NA	NA	NA
AMEM01000040.1	AMEM01000040.1_HMPREF9997_02385	404	72812	HMPREF9997_02425	54979	55488	EKX88062.1	169	NA	NA	NA	NA	NA
AMEM01000040.1	AMEM01000040.1_HMPREF9997_02385	404	72812	HMPREF9997_02426	55494	56408	EKX88063.1	304	NA	NA	NA	NA	NA
AMEM01000040.1	AMEM01000040.1_HMPREF9997_02385	404	72812	HMPREF9997_02427	56566	58419	EKX88064.1	617	NA	NA	NA	NA	NA
AMEM01000040.1	AMEM01000040.1_HMPREF9997_02385	404	72812	HMPREF9997_02428	58539	63410	EKX88065.1	1623	NA	NA	NA	NA	NA
AMEM01000040.1	AMEM01000040.1_HMPREF9997_02385	404	72812	HMPREF9997_02429	63418	64968	EKX88066.1	516	NA	NA	NA	NA	NA
AMEM01000040.1	AMEM01000040.1_HMPREF9997_02385	404	72812	HMPREF9997_02430	64979	65206	EKX88067.1	75	NA	NA	NA	NA	NA
AMEM01000040.1	AMEM01000040.1_HMPREF9997_02385	404	72812	HMPREF9997_02431	65368	66366	EKX88068.1	332	NA	NA	NA	NA	NA
AMEM01000040.1	AMEM01000040.1_HMPREF9997_02385	404	72812	HMPREF9997_02432	66414	69587	EKX88069.1	1057	NA	NA	NA	NA	NA
AMEM01000040.1	AMEM01000040.1_HMPREF9997_02385	404	72812	HMPREF9997_02433	69605	70339	EKX88070.1	244	NA	NA	NA	CP	TIGR00288 family protein
AMEM01000040.1	AMEM01000040.1_HMPREF9997_02385	404	72812	HMPREF9997_02434	70362	71189	EKX88071.1	275	NA	NA	NA	NA	NA
AMEM01000040.1	AMEM01000040.1_HMPREF9997_02385	404	72812	HMPREF9997_02435	71379	72812	EKX88072.1	477	NA	NA	NA	NA	NA
CP006842.1	CP006842.1_CGLY_15365	3280956	3404714	CGLY_15115	3280956	3282749	AHW65459.1	597	NA	NA	NA	NA	NA
CP006842.1	CP006842.1_CGLY_15365	3280956	3404714	CGLY_15120	3282789	3283721	AHW65460.1	310	NA	NA	NA	NA	NA
CP006842.1	CP006842.1_CGLY_15365	3280956	3404714	CGLY_15125	3283817	3284938	AHW65461.1	373	NA	NA	NA	NA	NA
CP006842.1	CP006842.1_CGLY_15365	3280956	3404714	CGLY_15130	3285038	3285832	AHW65462.1	264	NA	NA	NA	NA	NA
CP006842.1	CP006842.1_CGLY_15365	3280956	3404714	CGLY_15135	3285829	3286722	AHW65463.1	297	NA	NA	NA	NA	NA
CP006842.1	CP006842.1_CGLY_15365	3280956	3404714	CGLY_15140	3286886	3287869	AHW65464.1	327	NA	NA	NA	NA	NA
CP006842.1	CP006842.1_CGLY_15365	3280956	3404714	CGLY_15145	3287881	3288969	AHW65465.1	362	NA	NA	NA	NA	NA
CP006842.1	CP006842.1_CGLY_15365	3280956	3404714	CGLY_15150	3288974	3289972	AHW65466.1	332	NA	NA	NA	NA	NA
CP006842.1	CP006842.1_CGLY_15365	3280956	3404714	CGLY_15155	3290203	3291852	AHW65467.1	549	NA	NA	NA	NA	NA
CP006842.1	CP006842.1_CGLY_15365	3280956	3404714	CGLY_15160	3291849	3293582	AHW65468.1	577	NA	NA	NA	NA	NA
CP006842.1	CP006842.1_CGLY_15365	3280956	3404714	CGLY_15165	3293652	3295364	AHW65469.1	570	NA	NA	NA	NA	NA
CP006842.1	CP006842.1_CGLY_15365	3280956	3404714	CGLY_15170	3295454	3295882	AHW65470.1	142	NA	NA	NA	NA	NA
CP006842.1	CP006842.1_CGLY_15365	3280956	3404714	CGLY_15175	3295908	3296522	AHW65471.1	204	NA	NA	NA	NA	NA
CP006842.1	CP006842.1_CGLY_15365	3280956	3404714	CGLY_15180	3296789	3297616	AHW65472.1	275	NA	Michele_1A_hits_grouped	NA	NA	NA
CP006842.1	CP006842.1_CGLY_15365	3280956	3404714	CGLY_15185	3297616	3298599	AHW65473.1	327	NA	NA	NA	NA	NA
CP006842.1	CP006842.1_CGLY_15365	3280956	3404714	CGLY_15190	3298744	3300222	AHW65474.1	492	NA	NA	NA	NA	NA
CP006842.1	CP006842.1_CGLY_15365	3280956	3404714	CGLY_15195	3300271	3300879	AHW65475.1	202	NA	NA	NA	NA	NA
CP006842.1	CP006842.1_CGLY_15365	3280956	3404714	CGLY_15200	3300963	3301640	AHW65476.1	225	NA	NA	NA	NA	NA
CP006842.1	CP006842.1_CGLY_15365	3280956	3404714	CGLY_15205	3301644	3302993	AHW65477.1	449	NA	NA	NA	NA	NA
CP006842.1	CP006842.1_CGLY_15365	3280956	3404714	CGLY_15210	3303075	3303722	AHW65478.1	215	NA	NA	NA	NA	NA
CP006842.1	CP006842.1_CGLY_15365	3280956	3404714	CGLY_15215	3303833	3305053	AHW65479.1	406	NA	NA	NA	NA	NA
CP006842.1	CP006842.1_CGLY_15365	3280956	3404714	CGLY_15220	3305079	3306116	AHW65480.1	345	NA	NA	NA	NA	NA
CP006842.1	CP006842.1_CGLY_15365	3280956	3404714	CGLY_15225	3306152	3306724	AHW65481.1	190	NA	NA	NA	NA	NA
CP006842.1	CP006842.1_CGLY_15365	3280956	3404714	CGLY_15230	3306760	3307209	AHW65482.1	149	NA	NA	NA	NA	NA
CP006842.1	CP006842.1_CGLY_15365	3280956	3404714	CGLY_15235	3307224	3307976	AHW65483.1	250	NA	Michele_1A_hits_grouped	NA	NA	NA
CP006842.1	CP006842.1_CGLY_15365	3280956	3404714	CGLY_15240	3308094	3308996	AHW65484.1	300	NA	NA	NA	NA	NA
CP006842.1	CP006842.1_CGLY_15365	3280956	3404714	CGLY_15245	3308997	3309908	AHW65485.1	303	NA	NA	NA	NA	NA
CP006842.1	CP006842.1_CGLY_15365	3280956	3404714	CGLY_15250	3309965	3311233	AHW65486.1	422	NA	NA	NA	NA	NA
CP006842.1	CP006842.1_CGLY_15365	3280956	3404714	CGLY_15255	3311345	3312412	AHW65487.1	355	NA	NA	NA	NA	NA
CP006842.1	CP006842.1_CGLY_15365	3280956	3404714	CGLY_15260	3312409	3312756	AHW65488.1	115	NA	NA	NA	NA	NA
CP006842.1	CP006842.1_CGLY_15365	3280956	3404714	CGLY_15265	3312769	3313704	AHW65489.1	311	NA	NA	NA	NA	NA
CP006842.1	CP006842.1_CGLY_15365	3280956	3404714	CGLY_15270	3313701	3314654	AHW65490.1	317	NA	NA	NA	NA	NA
CP006842.1	CP006842.1_CGLY_15365	3280956	3404714	CGLY_15275	3314691	3316127	AHW65491.1	478	NA	NA	NA	NA	NA
CP006842.1	CP006842.1_CGLY_15365	3280956	3404714	CGLY_15280	3316124	3316876	AHW65492.1	250	NA	NA	NA	NA	NA
CP006842.1	CP006842.1_CGLY_15365	3280956	3404714	CGLY_15285	3317011	3318657	AHW65493.1	548	NA	NA	NA	NA	NA
CP006842.1	CP006842.1_CGLY_15365	3280956	3404714	CGLY_15290	3319049	3319915	AHW65494.1	288	NA	NA	NA	NA	NA
CP006842.1	CP006842.1_CGLY_15365	3280956	3404714	CGLY_15295	3320009	3321202	AHW65495.1	397	NA	NA	NA	NA	NA
CP006842.1	CP006842.1_CGLY_15365	3280956	3404714	CGLY_15300	3321209	3322300	AHW65496.1	363	NA	NA	NA	NA	NA
CP006842.1	CP006842.1_CGLY_15365	3280956	3404714	CGLY_15305	3322419	3322844	AHW65497.1	141	NA	NA	NA	NA	NA
CP006842.1	CP006842.1_CGLY_15365	3280956	3404714	CGLY_15310	3322900	3324180	AHW65498.1	426	NA	NA	NA	NA	NA
CP006842.1	CP006842.1_CGLY_15365	3280956	3404714	CGLY_15315	3324188	3324706	AHW65499.1	172	NA	NA	NA	NA	NA
CP006842.1	CP006842.1_CGLY_15365	3280956	3404714	CGLY_15320	3324713	3325654	AHW65500.1	313	NA	NA	NA	NA	NA
CP006842.1	CP006842.1_CGLY_15365	3280956	3404714	CGLY_15325	3325672	3326445	AHW65501.1	257	NA	NA	NA	NA	NA
CP006842.1	CP006842.1_CGLY_15365	3280956	3404714	CGLY_15330	3326607	3327443	AHW65502.1	278	NA	NA	NA	NA	NA
CP006842.1	CP006842.1_CGLY_15365	3280956	3404714	CGLY_15335	3327466	3328431	AHW65503.1	321	NA	NA	NA	NA	NA
CP006842.1	CP006842.1_CGLY_15365	3280956	3404714	CGLY_15340	3328657	3329259	AHW65504.1	200	NA	NA	NA	NA	NA
CP006842.1	CP006842.1_CGLY_15365	3280956	3404714	CGLY_15345	3329361	3329882	AHW65505.1	173	NA	NA	NA	NA	NA
CP006842.1	CP006842.1_CGLY_15365	3280956	3404714	CGLY_15350	3329894	3330583	AHW65506.1	229	NA	NA	NA	NA	NA
CP006842.1	CP006842.1_CGLY_15365	3280956	3404714	CGLY_15355	3330580	3332274	AHW65507.1	564	NA	NA	NA	NA	NA
CP006842.1	CP006842.1_CGLY_15365	3280956	3404714	CGLY_15360	3332359	3332967	AHW65508.1	202	NA	NA	NA	NA	NA
CP006842.1	CP006842.1_CGLY_15365	3280956	3404714	CGLY_15365	3333125	3333481	AHW65509.1	118	NA	NA	NA	NA	NA
CP006842.1	CP006842.1_CGLY_15365	3280956	3404714	CGLY_15370	3333502	3334146	AHW65510.1	214	NA	Detocs__dtcB	NA	NA	NA
CP006842.1	CP006842.1_CGLY_15365	3280956	3404714	CGLY_15375	3334204	3335445	AHW65511.1	413	NA	NA	NA	NA	NA
CP006842.1	CP006842.1_CGLY_15365	3280956	3404714	CGLY_15380	3335468	3336853	AHW65512.1	461	NA	NA	NA	NA	NA
CP006842.1	CP006842.1_CGLY_15365	3280956	3404714	CGLY_15385	3337172	3338935	AHW65513.1	587	NA	NA	NA	NA	NA
CP006842.1	CP006842.1_CGLY_15365	3280956	3404714	CGLY_15390	3338928	3340682	AHW65514.1	584	NA	NA	NA	NA	NA
CP006842.1	CP006842.1_CGLY_15365	3280956	3404714	CGLY_15395	3340812	3342692	AHW65515.1	626	NA	NA	NA	NA	NA
CP006842.1	CP006842.1_CGLY_15365	3280956	3404714	CGLY_15400	3342790	3344370	AHW65516.1	526	NA	aca1	NA	NA	NA
CP006842.1	CP006842.1_CGLY_15365	3280956	3404714	CGLY_15405	3344421	3345404	AHW65517.1	327	NA	NA	NA	NA	NA
CP006842.1	CP006842.1_CGLY_15365	3280956	3404714	CGLY_15410	3345430	3346116	AHW65518.1	228	NA	NA	NA	NA	NA
CP006842.1	CP006842.1_CGLY_15365	3280956	3404714	CGLY_15415	3346246	3347151	AHW65519.1	301	NA	NA	NA	NA	NA
CP006842.1	CP006842.1_CGLY_15365	3280956	3404714	CGLY_15420	3347530	3348564	AHW65520.1	344	NA	NA	NA	NA	NA
CP006842.1	CP006842.1_CGLY_15365	3280956	3404714	CGLY_15425	3354943	3355722	AHW65521.1	259	NA	NA	NA	NA	NA
CP006842.1	CP006842.1_CGLY_15365	3280956	3404714	CGLY_15430	3355929	3356168	AHW65522.1	79	NA	NA	NA	NA	NA
CP006842.1	CP006842.1_CGLY_15365	3280956	3404714	CGLY_15435	3356866	3357087	AHW65523.1	73	NA	NA	NA	PP	Antitoxin VbhA
CP006842.1	CP006842.1_CGLY_15365	3280956	3404714	CGLY_15440	3357091	3357783	AHW65524.1	230	NA	NA	NA	NA	NA
CP006842.1	CP006842.1_CGLY_15365	3280956	3404714	CGLY_15445	3363806	3364165	AHW65525.1	119	NA	NA	NA	NA	NA
CP006842.1	CP006842.1_CGLY_15365	3280956	3404714	CGLY_15450	3364232	3365041	AHW65526.1	269	NA	NA	NA	NA	NA
CP006842.1	CP006842.1_CGLY_15365	3280956	3404714	CGLY_15455	3365034	3365918	AHW65527.1	294	NA	NA	NA	NA	NA
CP006842.1	CP006842.1_CGLY_15365	3280956	3404714	CGLY_15460	3365918	3367036	AHW65528.1	372	NA	NA	NA	NA	NA
CP006842.1	CP006842.1_CGLY_15365	3280956	3404714	CGLY_15465	3367033	3367452	AHW65529.1	139	NA	NA	NA	NA	NA
CP006842.1	CP006842.1_CGLY_15365	3280956	3404714	CGLY_15470	3367481	3368662	AHW65530.1	393	NA	NA	NA	NA	NA
CP006842.1	CP006842.1_CGLY_15365	3280956	3404714	CGLY_15475	3368659	3369573	AHW65531.1	304	NA	NA	NA	NA	NA
CP006842.1	CP006842.1_CGLY_15365	3280956	3404714	CGLY_15480	3369570	3369944	AHW65532.1	124	NA	NA	NA	NA	NA
CP006842.1	CP006842.1_CGLY_15365	3280956	3404714	CGLY_15485	3370142	3371428	AHW65533.1	428	NA	NA	NA	NA	NA
CP006842.1	CP006842.1_CGLY_15365	3280956	3404714	CGLY_15490	3371519	3373507	AHW65534.1	662	NA	NA	NA	NA	NA
CP006842.1	CP006842.1_CGLY_15365	3280956	3404714	CGLY_15495	3373543	3377058	AHW65535.1	1171	NA	NA	NA	NA	NA
CP006842.1	CP006842.1_CGLY_15365	3280956	3404714	CGLY_15500	3377593	3379674	AHW65536.1	693	NA	NA	NA	NA	NA
CP006842.1	CP006842.1_CGLY_15365	3280956	3404714	CGLY_15505	3379685	3380527	AHW65537.1	280	NA	NA	NA	NA	NA
CP006842.1	CP006842.1_CGLY_15365	3280956	3404714	CGLY_15510	3380517	3381584	AHW65538.1	355	NA	NA	NA	NA	NA
CP006842.1	CP006842.1_CGLY_15365	3280956	3404714	CGLY_15515	3381623	3382069	AHW65539.1	148	NA	NA	NA	NA	NA
CP006842.1	CP006842.1_CGLY_15365	3280956	3404714	CGLY_15520	3382325	3383965	AHW65540.1	546	NA	NA	NA	NA	NA
CP006842.1	CP006842.1_CGLY_15365	3280956	3404714	CGLY_15525	3384117	3384935	AHW65541.1	272	NA	NA	NA	NA	NA
CP006842.1	CP006842.1_CGLY_15365	3280956	3404714	CGLY_15530	3384935	3385291	AHW65542.1	118	NA	NA	NA	NA	NA
CP006842.1	CP006842.1_CGLY_15365	3280956	3404714	CGLY_15535	3385545	3385835	AHW65543.1	96	NA	NA	NA	NA	NA
CP006842.1	CP006842.1_CGLY_15365	3280956	3404714	CGLY_15540	3385740	3386387	AHW65544.1	215	NA	NA	NA	NA	NA
CP006842.1	CP006842.1_CGLY_15365	3280956	3404714	CGLY_15545	3386416	3387993	AHW65545.1	525	NA	NA	NA	NA	NA
CP006842.1	CP006842.1_CGLY_15365	3280956	3404714	CGLY_15550	3387993	3392597	AHW65546.1	1534	NA	NA	NA	NA	NA
CP006842.1	CP006842.1_CGLY_15365	3280956	3404714	CGLY_15555	3393006	3393734	AHW65547.1	242	NA	NA	NA	NA	NA
CP006842.1	CP006842.1_CGLY_15365	3280956	3404714	CGLY_15560	3393898	3394377	AHW65548.1	159	NA	NA	NA	NA	NA
CP006842.1	CP006842.1_CGLY_15365	3280956	3404714	CGLY_15565	3394603	3395832	AHW65549.1	409	NA	NA	NA	NA	NA
CP006842.1	CP006842.1_CGLY_15365	3280956	3404714	CGLY_15570	3395825	3396379	AHW65550.1	184	NA	NA	NA	NA	NA
CP006842.1	CP006842.1_CGLY_15365	3280956	3404714	CGLY_15575	3396516	3396710	AHW65551.1	64	NA	MADS__mad1	NA	NA	NA
CP006842.1	CP006842.1_CGLY_15365	3280956	3404714	CGLY_15580	3396711	3397367	AHW65552.1	218	NA	NA	NA	NA	NA
CP006842.1	CP006842.1_CGLY_15365	3280956	3404714	CGLY_15585	3397364	3398779	AHW65553.1	471	NA	NA	NA	NA	NA
CP006842.1	CP006842.1_CGLY_15365	3280956	3404714	CGLY_15590	3399060	3399314	AHW65554.1	84	NA	NA	NA	NA	NA
CP006842.1	CP006842.1_CGLY_15365	3280956	3404714	CGLY_15595	3399379	3399780	AHW65555.1	133	NA	NA	NA	NA	NA
CP006842.1	CP006842.1_CGLY_15365	3280956	3404714	CGLY_15600	3399879	3402677	AHW65556.1	932	NA	RM_Type_IIG__Type_IIG_FAM_1.einsi_trimmed	RM_Type_IIG	NA	NA
CP006842.1	CP006842.1_CGLY_15365	3280956	3404714	CGLY_15605	3402770	3403261	AHW65557.1	163	NA	NA	NA	NA	NA
CP006842.1	CP006842.1_CGLY_15365	3280956	3404714	CGLY_15610	3403258	3403392	AHW65558.1	44	NA	NA	NA	NA	NA
CP006842.1	CP006842.1_CGLY_15365	3280956	3404714	CGLY_15615	3403716	3404714	AHW65559.1	332	NA	NA	NA	NA	NA
CP006842.1	CP006842.1_CGLY_15650	3342790	3467936	CGLY_15400	3342790	3344370	AHW65516.1	526	NA	aca1	NA	NA	NA
CP006842.1	CP006842.1_CGLY_15650	3342790	3467936	CGLY_15405	3344421	3345404	AHW65517.1	327	NA	NA	NA	NA	NA
CP006842.1	CP006842.1_CGLY_15650	3342790	3467936	CGLY_15410	3345430	3346116	AHW65518.1	228	NA	NA	NA	NA	NA
CP006842.1	CP006842.1_CGLY_15650	3342790	3467936	CGLY_15415	3346246	3347151	AHW65519.1	301	NA	NA	NA	NA	NA
CP006842.1	CP006842.1_CGLY_15650	3342790	3467936	CGLY_15420	3347530	3348564	AHW65520.1	344	NA	NA	NA	NA	NA
CP006842.1	CP006842.1_CGLY_15650	3342790	3467936	CGLY_15425	3354943	3355722	AHW65521.1	259	NA	NA	NA	NA	NA
CP006842.1	CP006842.1_CGLY_15650	3342790	3467936	CGLY_15430	3355929	3356168	AHW65522.1	79	NA	NA	NA	NA	NA
CP006842.1	CP006842.1_CGLY_15650	3342790	3467936	CGLY_15435	3356866	3357087	AHW65523.1	73	NA	NA	NA	PP	Antitoxin VbhA
CP006842.1	CP006842.1_CGLY_15650	3342790	3467936	CGLY_15440	3357091	3357783	AHW65524.1	230	NA	NA	NA	NA	NA
CP006842.1	CP006842.1_CGLY_15650	3342790	3467936	CGLY_15445	3363806	3364165	AHW65525.1	119	NA	NA	NA	NA	NA
CP006842.1	CP006842.1_CGLY_15650	3342790	3467936	CGLY_15450	3364232	3365041	AHW65526.1	269	NA	NA	NA	NA	NA
CP006842.1	CP006842.1_CGLY_15650	3342790	3467936	CGLY_15455	3365034	3365918	AHW65527.1	294	NA	NA	NA	NA	NA
CP006842.1	CP006842.1_CGLY_15650	3342790	3467936	CGLY_15460	3365918	3367036	AHW65528.1	372	NA	NA	NA	NA	NA
CP006842.1	CP006842.1_CGLY_15650	3342790	3467936	CGLY_15465	3367033	3367452	AHW65529.1	139	NA	NA	NA	NA	NA
CP006842.1	CP006842.1_CGLY_15650	3342790	3467936	CGLY_15470	3367481	3368662	AHW65530.1	393	NA	NA	NA	NA	NA
CP006842.1	CP006842.1_CGLY_15650	3342790	3467936	CGLY_15475	3368659	3369573	AHW65531.1	304	NA	NA	NA	NA	NA
CP006842.1	CP006842.1_CGLY_15650	3342790	3467936	CGLY_15480	3369570	3369944	AHW65532.1	124	NA	NA	NA	NA	NA
CP006842.1	CP006842.1_CGLY_15650	3342790	3467936	CGLY_15485	3370142	3371428	AHW65533.1	428	NA	NA	NA	NA	NA
CP006842.1	CP006842.1_CGLY_15650	3342790	3467936	CGLY_15490	3371519	3373507	AHW65534.1	662	NA	NA	NA	NA	NA
CP006842.1	CP006842.1_CGLY_15650	3342790	3467936	CGLY_15495	3373543	3377058	AHW65535.1	1171	NA	NA	NA	NA	NA
CP006842.1	CP006842.1_CGLY_15650	3342790	3467936	CGLY_15500	3377593	3379674	AHW65536.1	693	NA	NA	NA	NA	NA
CP006842.1	CP006842.1_CGLY_15650	3342790	3467936	CGLY_15505	3379685	3380527	AHW65537.1	280	NA	NA	NA	NA	NA
CP006842.1	CP006842.1_CGLY_15650	3342790	3467936	CGLY_15510	3380517	3381584	AHW65538.1	355	NA	NA	NA	NA	NA
CP006842.1	CP006842.1_CGLY_15650	3342790	3467936	CGLY_15515	3381623	3382069	AHW65539.1	148	NA	NA	NA	NA	NA
CP006842.1	CP006842.1_CGLY_15650	3342790	3467936	CGLY_15520	3382325	3383965	AHW65540.1	546	NA	NA	NA	NA	NA
CP006842.1	CP006842.1_CGLY_15650	3342790	3467936	CGLY_15525	3384117	3384935	AHW65541.1	272	NA	NA	NA	NA	NA
CP006842.1	CP006842.1_CGLY_15650	3342790	3467936	CGLY_15530	3384935	3385291	AHW65542.1	118	NA	NA	NA	NA	NA
CP006842.1	CP006842.1_CGLY_15650	3342790	3467936	CGLY_15535	3385545	3385835	AHW65543.1	96	NA	NA	NA	NA	NA
CP006842.1	CP006842.1_CGLY_15650	3342790	3467936	CGLY_15540	3385740	3386387	AHW65544.1	215	NA	NA	NA	NA	NA
CP006842.1	CP006842.1_CGLY_15650	3342790	3467936	CGLY_15545	3386416	3387993	AHW65545.1	525	NA	NA	NA	NA	NA
CP006842.1	CP006842.1_CGLY_15650	3342790	3467936	CGLY_15550	3387993	3392597	AHW65546.1	1534	NA	NA	NA	NA	NA
CP006842.1	CP006842.1_CGLY_15650	3342790	3467936	CGLY_15555	3393006	3393734	AHW65547.1	242	NA	NA	NA	NA	NA
CP006842.1	CP006842.1_CGLY_15650	3342790	3467936	CGLY_15560	3393898	3394377	AHW65548.1	159	NA	NA	NA	NA	NA
CP006842.1	CP006842.1_CGLY_15650	3342790	3467936	CGLY_15565	3394603	3395832	AHW65549.1	409	NA	NA	NA	NA	NA
CP006842.1	CP006842.1_CGLY_15650	3342790	3467936	CGLY_15570	3395825	3396379	AHW65550.1	184	NA	NA	NA	NA	NA
CP006842.1	CP006842.1_CGLY_15650	3342790	3467936	CGLY_15575	3396516	3396710	AHW65551.1	64	NA	MADS__mad1	NA	NA	NA
CP006842.1	CP006842.1_CGLY_15650	3342790	3467936	CGLY_15580	3396711	3397367	AHW65552.1	218	NA	NA	NA	NA	NA
CP006842.1	CP006842.1_CGLY_15650	3342790	3467936	CGLY_15585	3397364	3398779	AHW65553.1	471	NA	NA	NA	NA	NA
CP006842.1	CP006842.1_CGLY_15650	3342790	3467936	CGLY_15590	3399060	3399314	AHW65554.1	84	NA	NA	NA	NA	NA
CP006842.1	CP006842.1_CGLY_15650	3342790	3467936	CGLY_15595	3399379	3399780	AHW65555.1	133	NA	NA	NA	NA	NA
CP006842.1	CP006842.1_CGLY_15650	3342790	3467936	CGLY_15600	3399879	3402677	AHW65556.1	932	NA	RM_Type_IIG__Type_IIG_FAM_1.einsi_trimmed	RM_Type_IIG	NA	NA
CP006842.1	CP006842.1_CGLY_15650	3342790	3467936	CGLY_15605	3402770	3403261	AHW65557.1	163	NA	NA	NA	NA	NA
CP006842.1	CP006842.1_CGLY_15650	3342790	3467936	CGLY_15610	3403258	3403392	AHW65558.1	44	NA	NA	NA	NA	NA
CP006842.1	CP006842.1_CGLY_15650	3342790	3467936	CGLY_15615	3403716	3404714	AHW65559.1	332	NA	NA	NA	NA	NA
CP006842.1	CP006842.1_CGLY_15650	3342790	3467936	CGLY_15620	3404711	3406048	AHW65560.1	445	NA	Dnd__DndA	NA	NA	NA
CP006842.1	CP006842.1_CGLY_15650	3342790	3467936	CGLY_15625	3406153	3407112	AHW65561.1	319	NA	NA	NA	NA	NA
CP006842.1	CP006842.1_CGLY_15650	3342790	3467936	CGLY_15630	3407125	3407913	AHW65562.1	262	NA	NA	NA	NA	NA
CP006842.1	CP006842.1_CGLY_15650	3342790	3467936	CGLY_15635	3408044	3408535	AHW65563.1	163	NA	NA	NA	NA	NA
CP006842.1	CP006842.1_CGLY_15650	3342790	3467936	CGLY_15640	3408557	3409954	AHW65564.1	465	NA	NA	NA	NA	NA
CP006842.1	CP006842.1_CGLY_15650	3342790	3467936	CGLY_15645	3410072	3411868	AHW65565.1	598	NA	NA	NA	NA	NA
CP006842.1	CP006842.1_CGLY_15650	3342790	3467936	CGLY_15650	3412050	3412403	AHW65566.1	117	NA	NA	NA	NA	NA
CP006842.1	CP006842.1_CGLY_15650	3342790	3467936	CGLY_15655	3412542	3412967	AHW65567.1	141	NA	NA	NA	NA	NA
CP006842.1	CP006842.1_CGLY_15650	3342790	3467936	CGLY_15660	3412985	3414088	AHW65568.1	367	NA	NA	NA	NA	NA
CP006842.1	CP006842.1_CGLY_15650	3342790	3467936	CGLY_15665	3414189	3414647	AHW65569.1	152	NA	NA	NA	NA	NA
CP006842.1	CP006842.1_CGLY_15650	3342790	3467936	CGLY_15670	3414621	3415442	AHW65570.1	273	NA	NA	NA	NA	NA
CP006842.1	CP006842.1_CGLY_15650	3342790	3467936	CGLY_15675	3415527	3416009	AHW65571.1	160	NA	NA	NA	NA	NA
CP006842.1	CP006842.1_CGLY_15650	3342790	3467936	CGLY_15680	3416028	3417518	AHW65572.1	496	NA	NA	NA	NA	NA
CP006842.1	CP006842.1_CGLY_15650	3342790	3467936	CGLY_15685	3417493	3418284	AHW65573.1	263	NA	NA	NA	NA	NA
CP006842.1	CP006842.1_CGLY_15650	3342790	3467936	CGLY_15690	3418286	3419626	AHW65574.1	446	NA	NA	NA	NA	NA
CP006842.1	CP006842.1_CGLY_15650	3342790	3467936	CGLY_15695	3419623	3420849	AHW65575.1	408	NA	NA	NA	NA	NA
CP006842.1	CP006842.1_CGLY_15650	3342790	3467936	CGLY_15700	3420846	3422930	AHW65576.1	694	NA	NA	NA	NA	NA
CP006842.1	CP006842.1_CGLY_15650	3342790	3467936	CGLY_15705	3423067	3423990	AHW65577.1	307	NA	NA	NA	NA	NA
CP006842.1	CP006842.1_CGLY_15650	3342790	3467936	CGLY_15710	3424090	3424542	AHW65578.1	150	NA	NA	NA	NA	NA
CP006842.1	CP006842.1_CGLY_15650	3342790	3467936	CGLY_15715	3424539	3425186	AHW65579.1	215	NA	NA	NA	NA	NA
CP006842.1	CP006842.1_CGLY_15650	3342790	3467936	CGLY_15720	3425358	3426557	AHW65580.1	399	NA	NA	NA	NA	NA
CP006842.1	CP006842.1_CGLY_15650	3342790	3467936	CGLY_15725	3426620	3427237	AHW65581.1	205	NA	NA	NA	NA	NA
CP006842.1	CP006842.1_CGLY_15650	3342790	3467936	CGLY_15730	3427234	3427710	AHW65582.1	158	NA	NA	NA	NA	NA
CP006842.1	CP006842.1_CGLY_15650	3342790	3467936	CGLY_15735	3427814	3428134	AHW65583.1	106	NA	NA	NA	NA	NA
CP006842.1	CP006842.1_CGLY_15650	3342790	3467936	CGLY_15740	3428141	3431191	AHW65584.1	1016	NA	NA	NA	NA	NA
CP006842.1	CP006842.1_CGLY_15650	3342790	3467936	CGLY_15745	3431268	3432683	AHW65585.1	471	NA	NA	NA	NA	NA
CP006842.1	CP006842.1_CGLY_15650	3342790	3467936	CGLY_15750	3432709	3433467	AHW65586.1	252	NA	Michele_1A_hits_grouped	NA	NA	NA
CP006842.1	CP006842.1_CGLY_15650	3342790	3467936	CGLY_15755	3434195	3434377	AHW65587.1	60	NA	NA	NA	NA	NA
CP006842.1	CP006842.1_CGLY_15650	3342790	3467936	CGLY_15760	3434469	3436916	AHW65588.1	815	NA	DS-23__DS-23	NA	NA	NA
CP006842.1	CP006842.1_CGLY_15650	3342790	3467936	CGLY_15765	3437032	3437511	AHW65589.1	159	NA	NA	NA	NA	NA
CP006842.1	CP006842.1_CGLY_15650	3342790	3467936	CGLY_15770	3437963	3438328	AHW65590.1	121	NA	NA	NA	NA	NA
CP006842.1	CP006842.1_CGLY_15650	3342790	3467936	CGLY_15775	3438353	3439489	AHW65591.1	378	NA	NA	NA	NA	NA
CP006842.1	CP006842.1_CGLY_15650	3342790	3467936	CGLY_15780	3439561	3439935	AHW65592.1	124	NA	NA	NA	NA	NA
CP006842.1	CP006842.1_CGLY_15650	3342790	3467936	CGLY_15785	3439939	3442245	AHW65593.1	768	NA	NA	NA	NA	NA
CP006842.1	CP006842.1_CGLY_15650	3342790	3467936	CGLY_15790	3442255	3443625	AHW65594.1	456	NA	NA	NA	NA	NA
CP006842.1	CP006842.1_CGLY_15650	3342790	3467936	CGLY_15795	3443820	3444458	AHW65595.1	212	NA	NA	NA	NA	NA
CP006842.1	CP006842.1_CGLY_15650	3342790	3467936	CGLY_15800	3444477	3445616	AHW65596.1	379	NA	NA	NA	NA	NA
CP006842.1	CP006842.1_CGLY_15650	3342790	3467936	CGLY_15805	3445637	3446443	AHW65597.1	268	NA	Michele_1A_hits_grouped	NA	NA	NA
CP006842.1	CP006842.1_CGLY_15650	3342790	3467936	CGLY_15810	3446440	3447951	AHW65598.1	503	NA	NA	NA	NA	NA
CP006842.1	CP006842.1_CGLY_15650	3342790	3467936	CGLY_15815	3447948	3449378	AHW65599.1	476	NA	NA	NA	NA	NA
CP006842.1	CP006842.1_CGLY_15650	3342790	3467936	CGLY_15820	3449384	3450274	AHW65600.1	296	NA	Michele_1A_hits_grouped	NA	NA	NA
CP006842.1	CP006842.1_CGLY_15650	3342790	3467936	CGLY_15825	3450585	3451367	AHW65601.1	260	NA	NA	NA	NA	NA
CP006842.1	CP006842.1_CGLY_15650	3342790	3467936	CGLY_15830	3451399	3452397	AHW65602.1	332	NA	NA	NA	NA	NA
CP006842.1	CP006842.1_CGLY_15650	3342790	3467936	CGLY_15835	3452624	3454903	AHW65603.1	759	NA	NA	NA	NA	NA
CP006842.1	CP006842.1_CGLY_15650	3342790	3467936	CGLY_15840	3454932	3456302	AHW65604.1	456	NA	NA	NA	NA	NA
CP006842.1	CP006842.1_CGLY_15650	3342790	3467936	CGLY_15845	3456490	3457041	AHW65605.1	183	NA	NA	NA	NA	NA
CP006842.1	CP006842.1_CGLY_15650	3342790	3467936	CGLY_15850	3457038	3458432	AHW65606.1	464	NA	NA	NA	NA	NA
CP006842.1	CP006842.1_CGLY_15650	3342790	3467936	CGLY_15855	3458549	3459442	AHW65607.1	297	NA	Michele_1A_hits_grouped	NA	NA	NA
CP006842.1	CP006842.1_CGLY_15650	3342790	3467936	CGLY_15860	3459475	3460539	AHW65608.1	354	NA	NA	NA	NA	NA
CP006842.1	CP006842.1_CGLY_15650	3342790	3467936	CGLY_15865	3460670	3461704	AHW65609.1	344	NA	NA	NA	CP	Uncharacterized membrane protein YgaE, UPF0421/DUF939 family
CP006842.1	CP006842.1_CGLY_15650	3342790	3467936	CGLY_15870	3461978	3462652	AHW65610.1	224	NA	NA	NA	NA	NA
CP006842.1	CP006842.1_CGLY_15650	3342790	3467936	CGLY_15875	3462662	3462982	AHW65611.1	106	NA	NA	NA	NA	NA
CP006842.1	CP006842.1_CGLY_15650	3342790	3467936	CGLY_15880	3463017	3464510	AHW65612.1	497	NA	NA	NA	NA	NA
CP006842.1	CP006842.1_CGLY_15650	3342790	3467936	CGLY_15885	3464773	3465639	AHW65613.1	288	NA	Type-III-B_CnuA	NA	NA	NA
CP006842.1	CP006842.1_CGLY_15650	3342790	3467936	CGLY_15890	3465759	3466832	AHW65614.1	357	NA	NA	NA	NA	NA
CP006842.1	CP006842.1_CGLY_15650	3342790	3467936	CGLY_15895	3466872	3467234	AHW65615.1	120	NA	NA	NA	NA	NA
CP006842.1	CP006842.1_CGLY_15650	3342790	3467936	CGLY_15900	3467427	3467936	AHW65616.1	169	NA	NA	NA	NA	NA
CP008944.1	CP008944.1_CATYP_10085	2139039	2306199	CATYP_09750	2139039	2140178	AIG64789.1	379	NA	NA	NA	NA	NA
CP008944.1	CP008944.1_CATYP_10085	2139039	2306199	CATYP_09755	2140165	2140572	AIG64790.1	135	NA	NA	NA	NA	NA
CP008944.1	CP008944.1_CATYP_10085	2139039	2306199	CATYP_09760	2140569	2140814	AIG64791.1	81	NA	NA	NA	NA	NA
CP008944.1	CP008944.1_CATYP_10085	2139039	2306199	CATYP_09765	2140820	2141545	AIG64792.1	241	NA	ardk	NA	NA	NA
CP008944.1	CP008944.1_CATYP_10085	2139039	2306199	CATYP_09770	2142015	2142689	AIG64793.1	224	NA	NA	NA	NA	NA
CP008944.1	CP008944.1_CATYP_10085	2139039	2306199	CATYP_09775	2142686	2143063	AIG64794.1	125	NA	Retron_VI__HTH	NA	NA	NA
CP008944.1	CP008944.1_CATYP_10085	2139039	2306199	CATYP_09780	2143133	2146162	AIG64795.1	1009	NA	RM__Type_I_REases_FAM_1.einsi_trimmed	RM_Type_I	NA	NA
CP008944.1	CP008944.1_CATYP_10085	2139039	2306199	CATYP_09790	2147353	2149401	AIG64796.1	682	NA	RM__Type_I_MTases_FAM_3	RM_Type_I	NA	NA
CP008944.1	CP008944.1_CATYP_10085	2139039	2306199	CATYP_09795	2149391	2149600	AIG64797.1	69	NA	NA	NA	NA	NA
CP008944.1	CP008944.1_CATYP_10085	2139039	2306199	CATYP_09810	2155529	2156731	AIG64798.1	400	NA	NA	NA	NA	NA
CP008944.1	CP008944.1_CATYP_10085	2139039	2306199	CATYP_09815	2156901	2158148	AIG64799.1	415	NA	NA	NA	NA	NA
CP008944.1	CP008944.1_CATYP_10085	2139039	2306199	CATYP_09820	2158330	2159964	AIG64800.1	544	NA	NA	NA	NA	NA
CP008944.1	CP008944.1_CATYP_10085	2139039	2306199	CATYP_09830	2160875	2161072	AIG64801.1	65	NA	NA	NA	NA	NA
CP008944.1	CP008944.1_CATYP_10085	2139039	2306199	CATYP_09840	2165494	2166903	AIG64802.1	469	NA	NA	NA	NA	NA
CP008944.1	CP008944.1_CATYP_10085	2139039	2306199	CATYP_09850	2168820	2169632	AIG64803.1	270	NA	NA	NA	NA	NA
CP008944.1	CP008944.1_CATYP_10085	2139039	2306199	CATYP_09855	2169865	2170680	AIG64804.1	271	NA	NA	NA	NA	NA
CP008944.1	CP008944.1_CATYP_10085	2139039	2306199	CATYP_09860	2170724	2171980	AIG64805.1	418	NA	NA	NA	NA	NA
CP008944.1	CP008944.1_CATYP_10085	2139039	2306199	CATYP_09865	2172136	2173956	AIG64806.1	606	NA	NA	NA	NA	NA
CP008944.1	CP008944.1_CATYP_10085	2139039	2306199	CATYP_09870	2174079	2174480	AIG64807.1	133	NA	NA	NA	NA	NA
CP008944.1	CP008944.1_CATYP_10085	2139039	2306199	CATYP_09880	2174661	2176154	AIG64808.1	497	NA	NA	NA	NA	NA
CP008944.1	CP008944.1_CATYP_10085	2139039	2306199	CATYP_09885	2176377	2177144	AIG64809.1	255	NA	NA	NA	NA	NA
CP008944.1	CP008944.1_CATYP_10085	2139039	2306199	CATYP_09905	2181857	2182234	AIG64810.1	125	NA	Rst_2TM_1TM_TIR__Rst_2TM_TIR	NA	NA	NA
CP008944.1	CP008944.1_CATYP_10085	2139039	2306199	CATYP_09915	2182585	2184129	AIG64811.1	514	NA	NA	NA	NA	NA
CP008944.1	CP008944.1_CATYP_10085	2139039	2306199	CATYP_09920	2184298	2189208	AIG64812.1	1636	NA	NA	NA	NA	NA
CP008944.1	CP008944.1_CATYP_10085	2139039	2306199	CATYP_09925	2189396	2191273	AIG64813.1	625	NA	NA	NA	NA	NA
CP008944.1	CP008944.1_CATYP_10085	2139039	2306199	CATYP_09930	2191388	2192311	AIG64814.1	307	NA	NA	NA	NA	NA
CP008944.1	CP008944.1_CATYP_10085	2139039	2306199	CATYP_09935	2192324	2192782	AIG64815.1	152	NA	NA	NA	NA	NA
CP008944.1	CP008944.1_CATYP_10085	2139039	2306199	CATYP_09940	2192879	2194828	AIG64816.1	649	NA	NA	NA	NA	NA
CP008944.1	CP008944.1_CATYP_10085	2139039	2306199	CATYP_09945	2195206	2196222	AIG64817.1	338	NA	NA	NA	NA	NA
CP008944.1	CP008944.1_CATYP_10085	2139039	2306199	CATYP_09955	2198436	2199416	AIG64818.1	326	NA	NA	NA	NA	NA
CP008944.1	CP008944.1_CATYP_10085	2139039	2306199	CATYP_09965	2199983	2201914	AIG64819.1	643	NA	NA	NA	NA	NA
CP008944.1	CP008944.1_CATYP_10085	2139039	2306199	CATYP_09970	2202290	2202517	AIG64820.1	75	NA	NA	NA	NA	NA
CP008944.1	CP008944.1_CATYP_10085	2139039	2306199	CATYP_09975	2202788	2203984	AIG64821.1	398	NA	NA	NA	NA	NA
CP008944.1	CP008944.1_CATYP_10085	2139039	2306199	CATYP_09980	2204232	2206136	AIG64822.1	634	NA	NA	NA	NA	NA
CP008944.1	CP008944.1_CATYP_10085	2139039	2306199	CATYP_09985	2206133	2206933	AIG64823.1	266	NA	NA	NA	NA	NA
CP008944.1	CP008944.1_CATYP_10085	2139039	2306199	CATYP_09990	2207077	2207895	AIG64824.1	272	NA	NA	NA	NA	NA
CP008944.1	CP008944.1_CATYP_10085	2139039	2306199	CATYP_09995	2207979	2209235	AIG64825.1	418	NA	NA	NA	NA	NA
CP008944.1	CP008944.1_CATYP_10085	2139039	2306199	CATYP_10000	2209328	2210320	AIG64826.1	330	NA	NA	NA	NA	NA
CP008944.1	CP008944.1_CATYP_10085	2139039	2306199	CATYP_10005	2210337	2210684	AIG64827.1	115	NA	NA	NA	NA	NA
CP008944.1	CP008944.1_CATYP_10085	2139039	2306199	CATYP_10015	2211399	2212517	AIG64828.1	372	NA	NA	NA	NA	NA
CP008944.1	CP008944.1_CATYP_10085	2139039	2306199	CATYP_10025	2214859	2215752	AIG64829.1	297	NA	NA	NA	NA	NA
CP008944.1	CP008944.1_CATYP_10085	2139039	2306199	CATYP_10030	2215768	2216700	AIG64830.1	310	NA	NA	NA	NA	NA
CP008944.1	CP008944.1_CATYP_10085	2139039	2306199	CATYP_10035	2216746	2217483	AIG64831.1	245	NA	NA	NA	NA	NA
CP008944.1	CP008944.1_CATYP_10085	2139039	2306199	CATYP_10050	2219690	2220643	AIG64832.1	317	NA	NA	NA	NA	NA
CP008944.1	CP008944.1_CATYP_10085	2139039	2306199	CATYP_10055	2220953	2221633	AIG64833.1	226	NA	NA	NA	NA	NA
CP008944.1	CP008944.1_CATYP_10085	2139039	2306199	CATYP_10060	2221919	2222524	AIG64834.1	201	NA	NA	NA	NA	NA
CP008944.1	CP008944.1_CATYP_10085	2139039	2306199	CATYP_10065	2222673	2224460	AIG64835.1	595	NA	NA	NA	NA	NA
CP008944.1	CP008944.1_CATYP_10085	2139039	2306199	CATYP_10070	2224489	2225424	AIG64836.1	311	NA	NA	NA	NA	NA
CP008944.1	CP008944.1_CATYP_10085	2139039	2306199	CATYP_10075	2225489	2226757	AIG64837.1	422	NA	NA	NA	NA	NA
CP008944.1	CP008944.1_CATYP_10085	2139039	2306199	CATYP_10080	2226864	2227502	AIG64838.1	212	NA	NA	NA	NA	NA
CP008944.1	CP008944.1_CATYP_10085	2139039	2306199	CATYP_10085	2227683	2228021	AIG64839.1	112	NA	NA	NA	NA	NA
CP008944.1	CP008944.1_CATYP_10085	2139039	2306199	CATYP_10090	2228176	2228826	AIG64840.1	216	NA	Detocs__dtcB	NA	NA	NA
CP008944.1	CP008944.1_CATYP_10085	2139039	2306199	CATYP_10100	2230312	2231007	AIG64841.1	231	NA	NA	NA	NA	NA
CP008944.1	CP008944.1_CATYP_10085	2139039	2306199	CATYP_10105	2231004	2231159	AIG64842.1	51	NA	NA	NA	NA	NA
CP008944.1	CP008944.1_CATYP_10085	2139039	2306199	CATYP_10110	2231297	2232175	AIG64843.1	292	NA	NA	NA	NA	NA
CP008944.1	CP008944.1_CATYP_10085	2139039	2306199	CATYP_10120	2233583	2234233	AIG64844.1	216	NA	NA	NA	NA	NA
CP008944.1	CP008944.1_CATYP_10085	2139039	2306199	CATYP_10125	2234658	2234927	AIG64845.1	89	NA	NA	NA	NA	NA
CP008944.1	CP008944.1_CATYP_10085	2139039	2306199	CATYP_10130	2235095	2235997	AIG64846.1	300	NA	NA	NA	NA	NA
CP008944.1	CP008944.1_CATYP_10085	2139039	2306199	CATYP_10160	2244232	2244606	AIG64847.1	124	NA	NA	NA	NA	NA
CP008944.1	CP008944.1_CATYP_10085	2139039	2306199	CATYP_10165	2245047	2246534	AIG64848.1	495	NA	NA	NA	NA	NA
CP008944.1	CP008944.1_CATYP_10085	2139039	2306199	CATYP_10170	2246531	2247391	AIG64849.1	286	NA	Type-III-B_CnuA	NA	NA	NA
CP008944.1	CP008944.1_CATYP_10085	2139039	2306199	CATYP_10175	2247547	2247915	AIG64850.1	122	NA	NA	NA	NA	NA
CP008944.1	CP008944.1_CATYP_10085	2139039	2306199	CATYP_10180	2248157	2250484	AIG64851.1	775	NA	NA	NA	NA	NA
CP008944.1	CP008944.1_CATYP_10085	2139039	2306199	CATYP_10185	2250481	2252049	AIG64852.1	522	NA	NA	NA	NA	NA
CP008944.1	CP008944.1_CATYP_10085	2139039	2306199	CATYP_10190	2252603	2253055	AIG64853.1	150	NA	NA	NA	NA	NA
CP008944.1	CP008944.1_CATYP_10085	2139039	2306199	CATYP_10195	2253107	2253709	AIG64854.1	200	NA	vcrx091	NA	NA	NA
CP008944.1	CP008944.1_CATYP_10085	2139039	2306199	CATYP_10200	2253792	2254079	AIG64855.1	95	NA	NA	NA	NA	NA
CP008944.1	CP008944.1_CATYP_10085	2139039	2306199	CATYP_10205	2254246	2254650	AIG64856.1	134	NA	NA	NA	NA	NA
CP008944.1	CP008944.1_CATYP_10085	2139039	2306199	CATYP_10225	2258633	2259052	AIG64857.1	139	NA	NA	NA	NA	NA
CP008944.1	CP008944.1_CATYP_10085	2139039	2306199	CATYP_10230	2259265	2259723	AIG64858.1	152	NA	Lamassu-Fam__LmuC_acc_Mrr	NA	NA	NA
CP008944.1	CP008944.1_CATYP_10085	2139039	2306199	CATYP_10235	2259792	2260796	AIG64859.1	334	NA	NA	NA	NA	NA
CP008944.1	CP008944.1_CATYP_10085	2139039	2306199	CATYP_10240	2260869	2261357	AIG64860.1	162	NA	NA	NA	NA	NA
CP008944.1	CP008944.1_CATYP_10085	2139039	2306199	CATYP_10245	2261433	2261795	AIG64861.1	120	NA	NA	NA	NA	NA
CP008944.1	CP008944.1_CATYP_10085	2139039	2306199	CATYP_10250	2261850	2262266	AIG64862.1	138	NA	NA	NA	NA	NA
CP008944.1	CP008944.1_CATYP_10085	2139039	2306199	CATYP_10255	2262442	2263929	AIG64863.1	495	NA	NA	NA	NA	NA
CP008944.1	CP008944.1_CATYP_10085	2139039	2306199	CATYP_10260	2264198	2264674	AIG64864.1	158	NA	NA	NA	NA	NA
CP008944.1	CP008944.1_CATYP_10085	2139039	2306199	CATYP_10265	2265009	2265824	AIG64865.1	271	NA	NA	NA	NA	NA
CP008944.1	CP008944.1_CATYP_10085	2139039	2306199	CATYP_10275	2266603	2267154	AIG64866.1	183	NA	NA	NA	NA	NA
CP008944.1	CP008944.1_CATYP_10085	2139039	2306199	CATYP_10280	2267734	2269317	AIG64867.1	527	NA	NA	NA	NA	NA
CP008944.1	CP008944.1_CATYP_10085	2139039	2306199	CATYP_10290	2270525	2270998	AIG64868.1	157	NA	NA	NA	NA	NA
CP008944.1	CP008944.1_CATYP_10085	2139039	2306199	CATYP_10295	2271203	2271964	AIG64869.1	253	NA	NA	NA	NA	NA
CP008944.1	CP008944.1_CATYP_10085	2139039	2306199	CATYP_10300	2272028	2274919	AIG64870.1	963	NA	NA	NA	NA	NA
CP008944.1	CP008944.1_CATYP_10085	2139039	2306199	CATYP_10310	2275467	2276966	AIG64871.1	499	NA	NA	NA	NA	NA
CP008944.1	CP008944.1_CATYP_10085	2139039	2306199	CATYP_10320	2278469	2278888	AIG64872.1	139	NA	NA	NA	NA	NA
CP008944.1	CP008944.1_CATYP_10085	2139039	2306199	CATYP_10325	2279062	2279382	AIG64873.1	106	NA	NA	NA	NA	NA
CP008944.1	CP008944.1_CATYP_10085	2139039	2306199	CATYP_10330	2279607	2281859	AIG64874.1	750	NA	NA	NA	NA	NA
CP008944.1	CP008944.1_CATYP_10085	2139039	2306199	CATYP_10335	2281891	2282664	AIG64875.1	257	NA	NA	NA	NA	NA
CP008944.1	CP008944.1_CATYP_10085	2139039	2306199	CATYP_10340	2283453	2285015	AIG64876.1	520	NA	NA	NA	NA	NA
CP008944.1	CP008944.1_CATYP_10085	2139039	2306199	CATYP_10350	2285904	2286932	AIG64877.1	342	NA	NA	NA	NA	NA
CP008944.1	CP008944.1_CATYP_10085	2139039	2306199	CATYP_10365	2289824	2290693	AIG64878.1	289	NA	NA	NA	NA	NA
CP008944.1	CP008944.1_CATYP_10085	2139039	2306199	CATYP_10370	2290773	2291138	AIG64879.1	121	NA	NA	NA	NA	NA
CP008944.1	CP008944.1_CATYP_10085	2139039	2306199	CATYP_10375	2291182	2292165	AIG64880.1	327	NA	NA	NA	NA	NA
CP008944.1	CP008944.1_CATYP_10085	2139039	2306199	CATYP_10380	2292270	2292569	AIG64881.1	99	NA	NA	NA	NA	NA
CP008944.1	CP008944.1_CATYP_10085	2139039	2306199	CATYP_10385	2292575	2292922	AIG64882.1	115	NA	NA	NA	NA	NA
CP008944.1	CP008944.1_CATYP_10085	2139039	2306199	CATYP_10390	2292922	2293641	AIG64883.1	239	NA	NA	NA	NA	NA
CP008944.1	CP008944.1_CATYP_10085	2139039	2306199	CATYP_10395	2293771	2294379	AIG64884.1	202	NA	NA	NA	NA	NA
CP008944.1	CP008944.1_CATYP_10085	2139039	2306199	CATYP_10400	2294379	2295899	AIG64885.1	506	NA	NA	NA	NA	NA
CP008944.1	CP008944.1_CATYP_10085	2139039	2306199	CATYP_10405	2296138	2296632	AIG64886.1	164	NA	NA	NA	NA	NA
CP008944.1	CP008944.1_CATYP_10085	2139039	2306199	CATYP_10425	2303740	2304663	AIG64887.1	307	NA	NA	NA	NA	NA
CP008944.1	CP008944.1_CATYP_10085	2139039	2306199	CATYP_10430	2304663	2304977	AIG64888.1	104	NA	NA	NA	NA	NA
CP008944.1	CP008944.1_CATYP_10085	2139039	2306199	CATYP_10435	2305009	2306199	AIG64889.1	396	NA	NA	NA	NA	NA
CP009247.1	CP009247.1_CFRA_11185	2445781	2595879	CFRA_10875	2445781	2446923	APT89645.1	380	NA	NA	NA	NA	NA
CP009247.1	CP009247.1_CFRA_11185	2445781	2595879	CFRA_10880	2446972	2447760	APT89646.1	262	NA	NA	NA	NA	NA
CP009247.1	CP009247.1_CFRA_11185	2445781	2595879	CFRA_10885	2447824	2448039	APT89647.1	71	NA	NA	NA	NA	NA
CP009247.1	CP009247.1_CFRA_11185	2445781	2595879	CFRA_10890	2448203	2449015	APT89648.1	270	NA	NA	NA	NA	NA
CP009247.1	CP009247.1_CFRA_11185	2445781	2595879	CFRA_10895	2449084	2450904	APT89649.1	606	NA	NA	NA	NA	NA
CP009247.1	CP009247.1_CFRA_11185	2445781	2595879	CFRA_10900	2451031	2451402	APT89650.1	123	NA	NA	NA	NA	NA
CP009247.1	CP009247.1_CFRA_11185	2445781	2595879	CFRA_10905	2451399	2452709	APT89651.1	436	NA	NA	NA	NA	NA
CP009247.1	CP009247.1_CFRA_11185	2445781	2595879	CFRA_10910	2452901	2453728	APT89652.1	275	NA	NA	NA	NA	NA
CP009247.1	CP009247.1_CFRA_11185	2445781	2595879	CFRA_10915	2453737	2454411	APT89653.1	224	NA	NA	NA	CP	TIGR00288 family protein
CP009247.1	CP009247.1_CFRA_11185	2445781	2595879	CFRA_10920	2454427	2456814	APT89654.1	795	NA	NA	NA	NA	NA
CP009247.1	CP009247.1_CFRA_11185	2445781	2595879	CFRA_10925	2456848	2457834	APT89655.1	328	NA	NA	NA	NA	NA
CP009247.1	CP009247.1_CFRA_11185	2445781	2595879	CFRA_10930	2457881	2458258	APT89656.1	125	NA	NA	NA	NA	NA
CP009247.1	CP009247.1_CFRA_11185	2445781	2595879	CFRA_10940	2458686	2460230	APT89657.1	514	NA	NA	NA	NA	NA
CP009247.1	CP009247.1_CFRA_11185	2445781	2595879	CFRA_10950	2465483	2467336	APT89658.1	617	NA	NA	NA	NA	NA
CP009247.1	CP009247.1_CFRA_11185	2445781	2595879	CFRA_10955	2467526	2468452	APT89659.1	308	NA	NA	NA	NA	NA
CP009247.1	CP009247.1_CFRA_11185	2445781	2595879	CFRA_10960	2468456	2469013	APT89660.1	185	NA	NA	NA	NA	NA
CP009247.1	CP009247.1_CFRA_11185	2445781	2595879	CFRA_10965	2469016	2470935	APT89661.1	639	NA	NA	NA	NA	NA
CP009247.1	CP009247.1_CFRA_11185	2445781	2595879	CFRA_10970	2471268	2472296	APT89662.1	342	NA	NA	NA	NA	NA
CP009247.1	CP009247.1_CFRA_11185	2445781	2595879	CFRA_10980	2474580	2475563	APT89663.1	327	NA	NA	NA	NA	NA
CP009247.1	CP009247.1_CFRA_11185	2445781	2595879	CFRA_10985	2475560	2476093	APT89664.1	177	NA	NA	NA	NA	NA
CP009247.1	CP009247.1_CFRA_11185	2445781	2595879	CFRA_10990	2476105	2478123	APT89665.1	672	NA	NA	NA	NA	NA
CP009247.1	CP009247.1_CFRA_11185	2445781	2595879	CFRA_10995	2478339	2478584	APT89666.1	81	NA	NA	NA	NA	NA
CP009247.1	CP009247.1_CFRA_11185	2445781	2595879	CFRA_11000	2479029	2480225	APT89667.1	398	NA	NA	NA	NA	NA
CP009247.1	CP009247.1_CFRA_11185	2445781	2595879	CFRA_11005	2480506	2482707	APT89668.1	733	NA	NA	NA	NA	NA
CP009247.1	CP009247.1_CFRA_11185	2445781	2595879	CFRA_11015	2483125	2483982	APT89669.1	285	NA	NA	NA	NA	NA
CP009247.1	CP009247.1_CFRA_11185	2445781	2595879	CFRA_11020	2484016	2485545	APT89670.1	509	NA	NA	NA	NA	NA
CP009247.1	CP009247.1_CFRA_11185	2445781	2595879	CFRA_11025	2485551	2486420	APT89671.1	289	NA	NA	NA	NA	NA
CP009247.1	CP009247.1_CFRA_11185	2445781	2595879	CFRA_11030	2486417	2487676	APT89672.1	419	NA	NA	NA	NA	NA
CP009247.1	CP009247.1_CFRA_11185	2445781	2595879	CFRA_11035	2487815	2488855	APT89673.1	346	NA	NA	NA	NA	NA
CP009247.1	CP009247.1_CFRA_11185	2445781	2595879	CFRA_11040	2488852	2489199	APT89674.1	115	NA	NA	NA	NA	NA
CP009247.1	CP009247.1_CFRA_11185	2445781	2595879	CFRA_11045	2489281	2489949	APT89675.1	222	NA	NA	NA	NA	NA
CP009247.1	CP009247.1_CFRA_11185	2445781	2595879	CFRA_11055	2491211	2491435	APT89676.1	74	NA	NA	NA	NA	NA
CP009247.1	CP009247.1_CFRA_11185	2445781	2595879	CFRA_11060	2491439	2491807	APT89677.1	122	NA	NA	NA	NA	NA
CP009247.1	CP009247.1_CFRA_11185	2445781	2595879	CFRA_11065	2492320	2493468	APT89678.1	382	NA	NA	NA	NA	NA
CP009247.1	CP009247.1_CFRA_11185	2445781	2595879	CFRA_11070	2493672	2494832	APT89679.1	386	NA	NA	NA	NA	NA
CP009247.1	CP009247.1_CFRA_11185	2445781	2595879	CFRA_11075	2494928	2495761	APT89680.1	277	NA	NA	NA	NA	NA
CP009247.1	CP009247.1_CFRA_11185	2445781	2595879	CFRA_11100	2500084	2500416	APT89681.1	110	NA	NA	NA	NA	NA
CP009247.1	CP009247.1_CFRA_11185	2445781	2595879	CFRA_11105	2500445	2500819	APT89682.1	124	NA	NA	NA	NA	NA
CP009247.1	CP009247.1_CFRA_11185	2445781	2595879	CFRA_11110	2500950	2501660	APT89683.1	236	NA	NA	NA	NA	NA
CP009247.1	CP009247.1_CFRA_11185	2445781	2595879	CFRA_11120	2502965	2503888	APT89684.1	307	NA	NA	NA	NA	NA
CP009247.1	CP009247.1_CFRA_11185	2445781	2595879	CFRA_11125	2503952	2504689	APT89685.1	245	NA	NA	NA	NA	NA
CP009247.1	CP009247.1_CFRA_11185	2445781	2595879	CFRA_11130	2504829	2506733	APT89686.1	634	NA	NA	NA	NA	NA
CP009247.1	CP009247.1_CFRA_11185	2445781	2595879	CFRA_11135	2506981	2507937	APT89687.1	318	NA	NA	NA	NA	NA
CP009247.1	CP009247.1_CFRA_11185	2445781	2595879	CFRA_11140	2508315	2510207	APT89688.1	630	NA	NA	NA	NA	NA
CP009247.1	CP009247.1_CFRA_11185	2445781	2595879	CFRA_11150	2511003	2511677	APT89689.1	224	NA	NA	NA	NA	NA
CP009247.1	CP009247.1_CFRA_11185	2445781	2595879	CFRA_11155	2511873	2512475	APT89690.1	200	NA	NA	NA	NA	NA
CP009247.1	CP009247.1_CFRA_11185	2445781	2595879	CFRA_11160	2512632	2514440	APT89691.1	602	NA	NA	NA	NA	NA
CP009247.1	CP009247.1_CFRA_11185	2445781	2595879	CFRA_11165	2514524	2515069	APT89692.1	181	NA	NA	NA	NA	NA
CP009247.1	CP009247.1_CFRA_11185	2445781	2595879	CFRA_11170	2515255	2516193	APT89693.1	312	NA	NA	NA	NA	NA
CP009247.1	CP009247.1_CFRA_11185	2445781	2595879	CFRA_11180	2517769	2518398	APT89694.1	209	NA	NA	NA	NA	NA
CP009247.1	CP009247.1_CFRA_11185	2445781	2595879	CFRA_11185	2518646	2518987	APT89695.1	113	NA	NA	NA	NA	NA
CP009247.1	CP009247.1_CFRA_11185	2445781	2595879	CFRA_11190	2519140	2519778	APT89696.1	212	NA	Detocs__dtcB	NA	NA	NA
CP009247.1	CP009247.1_CFRA_11185	2445781	2595879	CFRA_11195	2519937	2521109	APT89697.1	390	NA	NA	NA	NA	NA
CP009247.1	CP009247.1_CFRA_11185	2445781	2595879	CFRA_11200	2521177	2521824	APT89698.1	215	NA	NA	NA	NA	NA
CP009247.1	CP009247.1_CFRA_11185	2445781	2595879	CFRA_11205	2521889	2522044	APT89699.1	51	NA	NA	NA	NA	NA
CP009247.1	CP009247.1_CFRA_11185	2445781	2595879	CFRA_11220	2524529	2525182	APT89700.1	217	NA	NA	NA	NA	NA
CP009247.1	CP009247.1_CFRA_11185	2445781	2595879	CFRA_11225	2525487	2525750	APT89701.1	87	NA	NA	NA	NA	NA
CP009247.1	CP009247.1_CFRA_11185	2445781	2595879	CFRA_11230	2525953	2526849	APT89702.1	298	NA	NA	NA	NA	NA
CP009247.1	CP009247.1_CFRA_11185	2445781	2595879	CFRA_11240	2527318	2528319	APT89703.1	333	NA	NA	NA	NA	NA
CP009247.1	CP009247.1_CFRA_11185	2445781	2595879	CFRA_11260	2534131	2534505	APT89704.1	124	NA	NA	NA	NA	NA
CP009247.1	CP009247.1_CFRA_11185	2445781	2595879	CFRA_11265	2534766	2536283	APT89705.1	505	NA	NA	NA	NA	NA
CP009247.1	CP009247.1_CFRA_11185	2445781	2595879	CFRA_11270	2536468	2537331	APT89706.1	287	NA	DS-34__DS-34B	NA	NA	NA
CP009247.1	CP009247.1_CFRA_11185	2445781	2595879	CFRA_11275	2537607	2537993	APT89707.1	128	NA	NA	NA	NA	NA
CP009247.1	CP009247.1_CFRA_11185	2445781	2595879	CFRA_11280	2538181	2540526	APT89708.1	781	NA	NA	NA	NA	NA
CP009247.1	CP009247.1_CFRA_11185	2445781	2595879	CFRA_11290	2541450	2542955	APT89709.1	501	NA	NA	NA	NA	NA
CP009247.1	CP009247.1_CFRA_11185	2445781	2595879	CFRA_11295	2543613	2544065	APT89710.1	150	NA	NA	NA	NA	NA
CP009247.1	CP009247.1_CFRA_11185	2445781	2595879	CFRA_11300	2544114	2544728	APT89711.1	204	NA	vcrx091	NA	NA	NA
CP009247.1	CP009247.1_CFRA_11185	2445781	2595879	CFRA_11305	2544821	2545108	APT89712.1	95	NA	NA	NA	NA	NA
CP009247.1	CP009247.1_CFRA_11185	2445781	2595879	CFRA_11310	2545379	2545843	APT89713.1	154	NA	NA	NA	NA	NA
CP009247.1	CP009247.1_CFRA_11185	2445781	2595879	CFRA_11315	2545985	2546173	APT89714.1	62	NA	NA	NA	NA	NA
CP009247.1	CP009247.1_CFRA_11185	2445781	2595879	CFRA_11325	2547885	2550089	APT89715.1	734	NA	NA	NA	NA	NA
CP009247.1	CP009247.1_CFRA_11185	2445781	2595879	CFRA_11330	2550207	2550572	APT89716.1	121	NA	NA	NA	NA	NA
CP009247.1	CP009247.1_CFRA_11185	2445781	2595879	CFRA_11335	2550895	2551356	APT89717.1	153	NA	NA	NA	NA	NA
CP009247.1	CP009247.1_CFRA_11185	2445781	2595879	CFRA_11340	2551602	2552540	APT89718.1	312	NA	NA	NA	NA	NA
CP009247.1	CP009247.1_CFRA_11185	2445781	2595879	CFRA_11345	2552744	2553193	APT89719.1	149	NA	NA	NA	NA	NA
CP009247.1	CP009247.1_CFRA_11185	2445781	2595879	CFRA_11350	2553346	2553747	APT89720.1	133	NA	NA	NA	NA	NA
CP009247.1	CP009247.1_CFRA_11185	2445781	2595879	CFRA_11355	2553867	2554283	APT89721.1	138	NA	NA	NA	NA	NA
CP009247.1	CP009247.1_CFRA_11185	2445781	2595879	CFRA_11360	2554385	2555875	APT89722.1	496	NA	NA	NA	NA	NA
CP009247.1	CP009247.1_CFRA_11185	2445781	2595879	CFRA_11365	2556001	2557626	APT89723.1	541	NA	NA	NA	NA	NA
CP009247.1	CP009247.1_CFRA_11185	2445781	2595879	CFRA_11370	2557808	2558299	APT89724.1	163	NA	NA	NA	NA	NA
CP009247.1	CP009247.1_CFRA_11185	2445781	2595879	CFRA_11375	2558643	2559566	APT89725.1	307	NA	NA	NA	NA	NA
CP009247.1	CP009247.1_CFRA_11185	2445781	2595879	CFRA_11380	2559652	2560254	APT89726.1	200	NA	NA	NA	NA	NA
CP009247.1	CP009247.1_CFRA_11185	2445781	2595879	CFRA_11385	2560749	2562332	APT89727.1	527	NA	NA	NA	NA	NA
CP009247.1	CP009247.1_CFRA_11185	2445781	2595879	CFRA_11390	2562406	2563920	APT89728.1	504	NA	NA	NA	NA	NA
CP009247.1	CP009247.1_CFRA_11185	2445781	2595879	CFRA_11410	2566920	2569769	APT89729.1	949	NA	NA	NA	NA	NA
CP009247.1	CP009247.1_CFRA_11185	2445781	2595879	CFRA_11415	2570054	2571313	APT89730.1	419	NA	NA	NA	NA	NA
CP009247.1	CP009247.1_CFRA_11185	2445781	2595879	CFRA_11420	2571471	2572709	APT89731.1	412	NA	NA	NA	NA	NA
CP009247.1	CP009247.1_CFRA_11185	2445781	2595879	CFRA_11425	2573099	2573518	APT89732.1	139	NA	NA	NA	NA	NA
CP009247.1	CP009247.1_CFRA_11185	2445781	2595879	CFRA_11430	2573776	2575320	APT89733.1	514	NA	NA	NA	NA	NA
CP009247.1	CP009247.1_CFRA_11185	2445781	2595879	CFRA_11440	2576041	2577069	APT89734.1	342	NA	NA	NA	NA	NA
CP009247.1	CP009247.1_CFRA_11185	2445781	2595879	CFRA_11445	2577107	2578579	APT89735.1	490	NA	NA	NA	NA	NA
CP009247.1	CP009247.1_CFRA_11185	2445781	2595879	CFRA_11450	2578703	2579932	APT89736.1	409	NA	NA	NA	NA	NA
CP009247.1	CP009247.1_CFRA_11185	2445781	2595879	CFRA_11455	2579929	2580795	APT89737.1	288	NA	NA	NA	NA	NA
CP009247.1	CP009247.1_CFRA_11185	2445781	2595879	CFRA_11460	2581543	2581914	APT89738.1	123	NA	NA	NA	NA	NA
CP009247.1	CP009247.1_CFRA_11185	2445781	2595879	CFRA_11470	2583183	2583494	APT89739.1	103	NA	NA	NA	NA	NA
CP009247.1	CP009247.1_CFRA_11185	2445781	2595879	CFRA_11475	2583757	2584113	APT89740.1	118	NA	NA	NA	NA	NA
CP009247.1	CP009247.1_CFRA_11185	2445781	2595879	CFRA_11480	2584113	2584838	APT89741.1	241	NA	NA	NA	NA	NA
CP009247.1	CP009247.1_CFRA_11185	2445781	2595879	CFRA_11485	2585160	2585765	APT89742.1	201	NA	NA	NA	NA	NA
CP009247.1	CP009247.1_CFRA_11185	2445781	2595879	CFRA_11490	2585863	2587305	APT89743.1	480	NA	NA	NA	NA	NA
CP009247.1	CP009247.1_CFRA_11185	2445781	2595879	CFRA_11495	2587496	2587987	APT89744.1	163	NA	NA	NA	NA	NA
CP009247.1	CP009247.1_CFRA_11185	2445781	2595879	CFRA_11515	2594932	2595879	APT89745.1	315	NA	NA	NA	NA	NA
CP009622.1	CP009622.1_CulFRC11_2104	2249852	2381482	CulFRC11_2054	2249852	2250493	AIU33602.1	213	NA	NA	NA	NA	NA
CP009622.1	CP009622.1_CulFRC11_2104	2249852	2381482	CulFRC11_2055	2250558	2252111	AIU33603.1	517	NA	NA	NA	NA	NA
CP009622.1	CP009622.1_CulFRC11_2104	2249852	2381482	CulFRC11_2056	2252136	2256974	AIU33604.1	1612	NA	NA	NA	NA	NA
CP009622.1	CP009622.1_CulFRC11_2104	2249852	2381482	CulFRC11_2057	2257185	2259032	AIU33605.1	615	NA	NA	NA	NA	NA
CP009622.1	CP009622.1_CulFRC11_2104	2249852	2381482	CulFRC11_2058	2259317	2260243	AIU33606.1	308	NA	NA	NA	NA	NA
CP009622.1	CP009622.1_CulFRC11_2104	2249852	2381482	CulFRC11_2059	2260249	2260776	AIU33607.1	175	NA	NA	NA	NA	NA
CP009622.1	CP009622.1_CulFRC11_2104	2249852	2381482	CulFRC11_2060	2260776	2262710	AIU33608.1	644	NA	NA	NA	NA	NA
CP009622.1	CP009622.1_CulFRC11_2104	2249852	2381482	CulFRC11_2061	2263076	2264395	AIU33609.1	439	NA	NA	NA	NA	NA
CP009622.1	CP009622.1_CulFRC11_2104	2249852	2381482	CulFRC11_2062	2264536	2265561	AIU33610.1	341	NA	NA	NA	NA	NA
CP009622.1	CP009622.1_CulFRC11_2104	2249852	2381482	CulFRC11_2063	2265807	2267738	AIU33611.1	643	NA	NA	NA	NA	NA
CP009622.1	CP009622.1_CulFRC11_2104	2249852	2381482	CulFRC11_2064	2267901	2268881	AIU33612.1	326	NA	NA	NA	NA	NA
CP009622.1	CP009622.1_CulFRC11_2104	2249852	2381482	CulFRC11_2065	2268882	2269388	AIU33613.1	168	NA	NA	NA	NA	NA
CP009622.1	CP009622.1_CulFRC11_2104	2249852	2381482	CulFRC11_2066	2269381	2271381	AIU33614.1	666	NA	NA	NA	NA	NA
CP009622.1	CP009622.1_CulFRC11_2104	2249852	2381482	CulFRC11_2067	2271639	2272994	AIU33615.1	451	NA	NA	NA	NA	NA
CP009622.1	CP009622.1_CulFRC11_2104	2249852	2381482	CulFRC11_2068	2272991	2273497	AIU33616.1	168	NA	NA	NA	NA	NA
CP009622.1	CP009622.1_CulFRC11_2104	2249852	2381482	CulFRC11_2069	2273710	2274807	AIU33617.1	365	NA	NA	NA	NA	NA
CP009622.1	CP009622.1_CulFRC11_2104	2249852	2381482	CulFRC11_2070	2274882	2276252	AIU33618.1	456	NA	NA	NA	NA	NA
CP009622.1	CP009622.1_CulFRC11_2104	2249852	2381482	CulFRC11_2071	2276637	2277872	AIU33619.1	411	NA	NA	NA	NA	NA
CP009622.1	CP009622.1_CulFRC11_2104	2249852	2381482	CulFRC11_2072	2277937	2278713	AIU33620.1	258	NA	NA	NA	NA	NA
CP009622.1	CP009622.1_CulFRC11_2104	2249852	2381482	CulFRC11_2073	2278715	2279749	AIU33621.1	344	NA	NA	NA	NA	NA
CP009622.1	CP009622.1_CulFRC11_2104	2249852	2381482	CulFRC11_2074	2279761	2280774	AIU33622.1	337	NA	NA	NA	NA	NA
CP009622.1	CP009622.1_CulFRC11_2104	2249852	2381482	CulFRC11_2075	2281247	2283268	AIU33623.1	673	NA	NA	NA	NA	NA
CP009622.1	CP009622.1_CulFRC11_2104	2249852	2381482	CulFRC11_2076	2283344	2284159	AIU33624.1	271	NA	NA	NA	NA	NA
CP009622.1	CP009622.1_CulFRC11_2104	2249852	2381482	CulFRC11_2077	2284328	2285176	AIU33625.1	282	NA	NA	NA	NA	NA
CP009622.1	CP009622.1_CulFRC11_2104	2249852	2381482	CulFRC11_2078	2285195	2286478	AIU33626.1	427	NA	NA	NA	NA	NA
CP009622.1	CP009622.1_CulFRC11_2104	2249852	2381482	CulFRC11_2079	2286519	2287292	AIU33627.1	257	NA	NA	NA	NA	NA
CP009622.1	CP009622.1_CulFRC11_2104	2249852	2381482	CulFRC11_2080	2287313	2288326	AIU33628.1	337	NA	NA	NA	NA	NA
CP009622.1	CP009622.1_CulFRC11_2104	2249852	2381482	CulFRC11_2081	2288326	2288673	AIU33629.1	115	NA	NA	NA	NA	NA
CP009622.1	CP009622.1_CulFRC11_2104	2249852	2381482	CulFRC11_2082	2288774	2289439	AIU33630.1	221	NA	NA	NA	NA	NA
CP009622.1	CP009622.1_CulFRC11_2104	2249852	2381482	CulFRC11_2083	2289443	2290366	AIU33631.1	307	NA	NA	NA	NA	NA
CP009622.1	CP009622.1_CulFRC11_2104	2249852	2381482	CulFRC11_2084	2290402	2291550	AIU33632.1	382	NA	NA	NA	NA	NA
CP009622.1	CP009622.1_CulFRC11_2104	2249852	2381482	CulFRC11_2085	2291547	2292308	AIU33633.1	253	NA	NA	NA	NA	NA
CP009622.1	CP009622.1_CulFRC11_2104	2249852	2381482	CulFRC11_2086	2292359	2293639	AIU33634.1	426	NA	NA	NA	NA	NA
CP009622.1	CP009622.1_CulFRC11_2104	2249852	2381482	CulFRC11_2087	2293742	2294845	AIU33635.1	367	NA	NA	NA	NA	NA
CP009622.1	CP009622.1_CulFRC11_2104	2249852	2381482	CulFRC11_2088	2294857	2296854	AIU33636.1	665	NA	NA	NA	NA	NA
CP009622.1	CP009622.1_CulFRC11_2104	2249852	2381482	CulFRC11_2089	2297068	2298627	AIU33637.1	519	NA	NA	NA	NA	NA
CP009622.1	CP009622.1_CulFRC11_2104	2249852	2381482	CulFRC11_2090	2298791	2299702	AIU33638.1	303	NA	NA	NA	NA	NA
CP009622.1	CP009622.1_CulFRC11_2104	2249852	2381482	CulFRC11_2091	2299766	2300485	AIU33639.1	239	NA	NA	NA	NA	NA
CP009622.1	CP009622.1_CulFRC11_2104	2249852	2381482	CulFRC11_2092	2300614	2301828	AIU33640.1	404	NA	NA	NA	NA	NA
CP009622.1	CP009622.1_CulFRC11_2104	2249852	2381482	CulFRC11_2093	2301840	2302310	AIU33641.1	156	NA	NA	NA	NA	NA
CP009622.1	CP009622.1_CulFRC11_2104	2249852	2381482	CulFRC11_2094	2302507	2303793	AIU33642.1	428	NA	NA	NA	NA	NA
CP009622.1	CP009622.1_CulFRC11_2104	2249852	2381482	CulFRC11_2095	2303939	2304889	AIU33643.1	316	NA	NA	NA	NA	NA
CP009622.1	CP009622.1_CulFRC11_2104	2249852	2381482	CulFRC11_2096	2305164	2305838	AIU33644.1	224	NA	NA	NA	NA	NA
CP009622.1	CP009622.1_CulFRC11_2104	2249852	2381482	CulFRC11_2097	2306213	2306815	AIU33645.1	200	NA	NA	NA	NA	NA
CP009622.1	CP009622.1_CulFRC11_2104	2249852	2381482	CulFRC11_2098	2307148	2307732	AIU33646.1	194	NA	NA	NA	NA	NA
CP009622.1	CP009622.1_CulFRC11_2104	2249852	2381482	CulFRC11_2099	2307707	2308666	AIU33647.1	319	NA	NA	NA	NA	NA
CP009622.1	CP009622.1_CulFRC11_2104	2249852	2381482	CulFRC11_2100	2308724	2309944	AIU33648.1	406	NA	NA	NA	NA	NA
CP009622.1	CP009622.1_CulFRC11_2104	2249852	2381482	CulFRC11_2101	2309941	2311311	AIU33649.1	456	NA	NA	NA	NA	NA
CP009622.1	CP009622.1_CulFRC11_2104	2249852	2381482	CulFRC11_2102	2311354	2312901	AIU33650.1	515	NA	NA	NA	NA	NA
CP009622.1	CP009622.1_CulFRC11_2104	2249852	2381482	CulFRC11_2103	2313065	2313697	AIU33651.1	210	NA	NA	NA	NA	NA
CP009622.1	CP009622.1_CulFRC11_2104	2249852	2381482	CulFRC11_2104	2314238	2314558	AIU33652.1	106	NA	NA	NA	NA	NA
CP009622.1	CP009622.1_CulFRC11_2104	2249852	2381482	CulFRC11_2105	2314614	2315252	AIU33653.1	212	NA	Detocs__dtcB	NA	NA	NA
CP009622.1	CP009622.1_CulFRC11_2104	2249852	2381482	CulFRC11_2106	2315388	2316713	AIU33654.1	441	NA	NA	NA	NA	NA
CP009622.1	CP009622.1_CulFRC11_2104	2249852	2381482	CulFRC11_2107	2316712	2317284	AIU33655.1	190	NA	NA	NA	NA	NA
CP009622.1	CP009622.1_CulFRC11_2104	2249852	2381482	CulFRC11_2108	2317513	2318400	AIU33656.1	295	NA	NA	NA	NA	NA
CP009622.1	CP009622.1_CulFRC11_2104	2249852	2381482	CulFRC11_2109	2318577	2319788	AIU33657.1	403	NA	NA	NA	NA	NA
CP009622.1	CP009622.1_CulFRC11_2104	2249852	2381482	CulFRC11_2110	2319785	2320420	AIU33658.1	211	NA	NA	NA	NA	NA
CP009622.1	CP009622.1_CulFRC11_2104	2249852	2381482	CulFRC11_2111	2320591	2321319	AIU33659.1	242	NA	NA	NA	NA	NA
CP009622.1	CP009622.1_CulFRC11_2104	2249852	2381482	CulFRC11_2112	2321378	2321635	AIU33660.1	85	NA	NA	NA	NA	NA
CP009622.1	CP009622.1_CulFRC11_2104	2249852	2381482	CulFRC11_2113	2321987	2322916	AIU33661.1	309	NA	NA	NA	NA	NA
CP009622.1	CP009622.1_CulFRC11_2104	2249852	2381482	CulFRC11_2114	2323101	2323244	AIU33662.1	47	NA	NA	NA	NA	NA
CP009622.1	CP009622.1_CulFRC11_2104	2249852	2381482	CulFRC11_2115	2323213	2324220	AIU33663.1	335	NA	NA	NA	NA	NA
CP009622.1	CP009622.1_CulFRC11_2104	2249852	2381482	CulFRC11_2119	2330524	2335464	AIU33664.1	1646	NA	RM_Type_IIG__Type_IIG_FAM_2.einsi_trimmed	RM_Type_IIG	NA	NA
CP009622.1	CP009622.1_CulFRC11_2104	2249852	2381482	CulFRC11_2120	2335483	2335857	AIU33665.1	124	NA	NA	NA	NA	NA
CP009622.1	CP009622.1_CulFRC11_2104	2249852	2381482	CulFRC11_2121	2336108	2337490	AIU33666.1	460	NA	NA	NA	NA	NA
CP009622.1	CP009622.1_CulFRC11_2104	2249852	2381482	CulFRC11_2122	2337596	2338468	AIU33667.1	290	NA	Type-III-B_CnuA	NA	NA	NA
CP009622.1	CP009622.1_CulFRC11_2104	2249852	2381482	CulFRC11_2123	2339087	2339455	AIU33668.1	122	NA	NA	NA	NA	NA
CP009622.1	CP009622.1_CulFRC11_2104	2249852	2381482	CulFRC11_2124	2339681	2339884	AIU33669.1	67	NA	NA	NA	NA	NA
CP009622.1	CP009622.1_CulFRC11_2104	2249852	2381482	CulFRC11_2125	2340019	2342310	AIU33670.1	763	NA	NA	NA	NA	NA
CP009622.1	CP009622.1_CulFRC11_2104	2249852	2381482	CulFRC11_2126	2342536	2343210	AIU33671.1	224	NA	NA	NA	NA	NA
CP009622.1	CP009622.1_CulFRC11_2104	2249852	2381482	CulFRC11_2127	2343516	2344868	AIU33672.1	450	NA	NA	NA	NA	NA
CP009622.1	CP009622.1_CulFRC11_2104	2249852	2381482	CulFRC11_2128	2344876	2346354	AIU33673.1	492	NA	NA	NA	NA	NA
CP009622.1	CP009622.1_CulFRC11_2104	2249852	2381482	CulFRC11_2129	2346437	2348410	AIU33674.1	657	NA	NA	NA	NA	NA
CP009622.1	CP009622.1_CulFRC11_2104	2249852	2381482	CulFRC11_2130	2349055	2349507	AIU33675.1	150	NA	NA	NA	NA	NA
CP009622.1	CP009622.1_CulFRC11_2104	2249852	2381482	CulFRC11_2131	2349608	2350174	AIU33676.1	188	NA	vcrx091	NA	NA	NA
CP009622.1	CP009622.1_CulFRC11_2104	2249852	2381482	CulFRC11_2132	2350320	2350607	AIU33677.1	95	NA	NA	NA	NA	NA
CP009622.1	CP009622.1_CulFRC11_2104	2249852	2381482	CulFRC11_2133	2350914	2351096	AIU33678.1	60	NA	NA	NA	NA	NA
CP009622.1	CP009622.1_CulFRC11_2104	2249852	2381482	CulFRC11_2134	2351096	2352637	AIU33679.1	513	NA	NA	NA	NA	NA
CP009622.1	CP009622.1_CulFRC11_2104	2249852	2381482	CulFRC11_2135	2352862	2355135	AIU33680.1	757	NA	NA	NA	NA	NA
CP009622.1	CP009622.1_CulFRC11_2104	2249852	2381482	CulFRC11_2136	2355329	2355715	AIU33681.1	128	NA	NA	NA	CC	NA
CP009622.1	CP009622.1_CulFRC11_2104	2249852	2381482	CulFRC11_2137	2355946	2356407	AIU33682.1	153	NA	NA	NA	NA	NA
CP009622.1	CP009622.1_CulFRC11_2104	2249852	2381482	CulFRC11_2138	2356491	2357468	AIU33683.1	325	NA	NA	NA	NA	NA
CP009622.1	CP009622.1_CulFRC11_2104	2249852	2381482	CulFRC11_2139	2357513	2358181	AIU33684.1	222	NA	Michele_1A_hits_grouped	NA	NA	NA
CP009622.1	CP009622.1_CulFRC11_2104	2249852	2381482	CulFRC11_2140	2358213	2358686	AIU33685.1	157	NA	NA	NA	NA	NA
CP009622.1	CP009622.1_CulFRC11_2104	2249852	2381482	CulFRC11_2141	2358696	2359634	AIU33686.1	312	NA	NA	NA	NA	NA
CP009622.1	CP009622.1_CulFRC11_2104	2249852	2381482	CulFRC11_2142	2359871	2360530	AIU33687.1	219	NA	NA	NA	NA	NA
CP009622.1	CP009622.1_CulFRC11_2104	2249852	2381482	CulFRC11_2143	2360765	2362972	AIU33688.1	735	NA	NA	NA	NA	NA
CP009622.1	CP009622.1_CulFRC11_2104	2249852	2381482	CulFRC11_2144	2363071	2363562	AIU33689.1	163	NA	NA	NA	NA	NA
CP009622.1	CP009622.1_CulFRC11_2104	2249852	2381482	CulFRC11_2145	2363625	2364446	AIU33690.1	273	NA	NA	NA	NA	NA
CP009622.1	CP009622.1_CulFRC11_2104	2249852	2381482	CulFRC11_2146	2364510	2366012	AIU33691.1	500	NA	NA	NA	NA	NA
CP009622.1	CP009622.1_CulFRC11_2104	2249852	2381482	CulFRC11_2147	2366009	2366539	AIU33692.1	176	NA	NA	NA	NA	NA
CP009622.1	CP009622.1_CulFRC11_2104	2249852	2381482	CulFRC11_2148	2366708	2368651	AIU33693.1	647	NA	NA	NA	NA	NA
CP009622.1	CP009622.1_CulFRC11_2104	2249852	2381482	CulFRC11_2149	2369189	2369698	AIU33694.1	169	NA	NA	NA	NA	NA
CP009622.1	CP009622.1_CulFRC11_2104	2249852	2381482	CulFRC11_2150	2369768	2372659	AIU33695.1	963	NA	NA	NA	NA	NA
CP009622.1	CP009622.1_CulFRC11_2104	2249852	2381482	CulFRC11_2151	2372929	2373207	AIU33696.1	92	NA	NA	NA	NA	NA
CP009622.1	CP009622.1_CulFRC11_2104	2249852	2381482	CulFRC11_2152	2373920	2374603	AIU33697.1	227	NA	NA	NA	NA	NA
CP009622.1	CP009622.1_CulFRC11_2104	2249852	2381482	CulFRC11_2153	2374600	2375652	AIU33698.1	350	NA	NA	NA	NA	NA
CP009622.1	CP009622.1_CulFRC11_2104	2249852	2381482	CulFRC11_2154	2375843	2378428	AIU33699.1	861	NA	NA	NA	NA	NA
CP009622.1	CP009622.1_CulFRC11_2104	2249852	2381482	CulFRC11_2155	2378578	2379855	AIU33700.1	425	NA	NA	NA	NA	NA
CP009622.1	CP009622.1_CulFRC11_2104	2249852	2381482	CulFRC11_2156	2379852	2380451	AIU33701.1	199	NA	NA	NA	NA	NA
CP009622.1	CP009622.1_CulFRC11_2104	2249852	2381482	CulFRC11_2157	2380448	2381482	AIU33702.1	344	NA	NA	NA	NA	NA
CP011913.1	CP011913.1_CulFRC58_2239	2340166	2455347	CulFRC58_2189	2340166	2342013	AKN78043.1	615	NA	NA	NA	NA	NA
CP011913.1	CP011913.1_CulFRC58_2239	2340166	2455347	CulFRC58_2190	2342296	2343222	AKN78044.1	308	NA	NA	NA	NA	NA
CP011913.1	CP011913.1_CulFRC58_2239	2340166	2455347	CulFRC58_2191	2343228	2343755	AKN78045.1	175	NA	NA	NA	NA	NA
CP011913.1	CP011913.1_CulFRC58_2239	2340166	2455347	CulFRC58_2192	2343755	2345689	AKN78046.1	644	NA	NA	NA	NA	NA
CP011913.1	CP011913.1_CulFRC58_2239	2340166	2455347	CulFRC58_2193	2346055	2347377	AKN78047.1	440	NA	NA	NA	NA	NA
CP011913.1	CP011913.1_CulFRC58_2239	2340166	2455347	CulFRC58_2194	2347516	2348541	AKN78048.1	341	NA	NA	NA	NA	NA
CP011913.1	CP011913.1_CulFRC58_2239	2340166	2455347	CulFRC58_2195	2348787	2350718	AKN78049.1	643	NA	NA	NA	NA	NA
CP011913.1	CP011913.1_CulFRC58_2239	2340166	2455347	CulFRC58_2196	2350881	2351861	AKN78050.1	326	NA	NA	NA	NA	NA
CP011913.1	CP011913.1_CulFRC58_2239	2340166	2455347	CulFRC58_2197	2351862	2352368	AKN78051.1	168	NA	NA	NA	NA	NA
CP011913.1	CP011913.1_CulFRC58_2239	2340166	2455347	CulFRC58_2198	2352361	2354352	AKN78052.1	663	NA	NA	NA	NA	NA
CP011913.1	CP011913.1_CulFRC58_2239	2340166	2455347	CulFRC58_2199	2354619	2355974	AKN78053.1	451	NA	NA	NA	NA	NA
CP011913.1	CP011913.1_CulFRC58_2239	2340166	2455347	CulFRC58_2200	2355971	2356477	AKN78054.1	168	NA	NA	NA	NA	NA
CP011913.1	CP011913.1_CulFRC58_2239	2340166	2455347	CulFRC58_2201	2356563	2359946	AKN78055.1	1127	NA	NA	NA	NA	NA
CP011913.1	CP011913.1_CulFRC58_2239	2340166	2455347	CulFRC58_2202	2360374	2361471	AKN78056.1	365	NA	NA	NA	NA	NA
CP011913.1	CP011913.1_CulFRC58_2239	2340166	2455347	CulFRC58_2203	2361546	2362916	AKN78057.1	456	NA	NA	NA	NA	NA
CP011913.1	CP011913.1_CulFRC58_2239	2340166	2455347	CulFRC58_2204	2363354	2364589	AKN78058.1	411	NA	NA	NA	NA	NA
CP011913.1	CP011913.1_CulFRC58_2239	2340166	2455347	CulFRC58_2205	2364654	2365430	AKN78059.1	258	NA	NA	NA	NA	NA
CP011913.1	CP011913.1_CulFRC58_2239	2340166	2455347	CulFRC58_2206	2365432	2366466	AKN78060.1	344	NA	NA	NA	NA	NA
CP011913.1	CP011913.1_CulFRC58_2239	2340166	2455347	CulFRC58_2207	2366478	2367491	AKN78061.1	337	NA	NA	NA	NA	NA
CP011913.1	CP011913.1_CulFRC58_2239	2340166	2455347	CulFRC58_2208	2367967	2369988	AKN78062.1	673	NA	NA	NA	NA	NA
CP011913.1	CP011913.1_CulFRC58_2239	2340166	2455347	CulFRC58_2209	2370064	2370879	AKN78063.1	271	NA	NA	NA	NA	NA
CP011913.1	CP011913.1_CulFRC58_2239	2340166	2455347	CulFRC58_2210	2371047	2371895	AKN78064.1	282	NA	NA	NA	NA	NA
CP011913.1	CP011913.1_CulFRC58_2239	2340166	2455347	CulFRC58_2211	2371914	2373197	AKN78065.1	427	NA	NA	NA	NA	NA
CP011913.1	CP011913.1_CulFRC58_2239	2340166	2455347	CulFRC58_2212	2373238	2374011	AKN78066.1	257	NA	NA	NA	NA	NA
CP011913.1	CP011913.1_CulFRC58_2239	2340166	2455347	CulFRC58_2213	2374032	2375045	AKN78067.1	337	NA	NA	NA	NA	NA
CP011913.1	CP011913.1_CulFRC58_2239	2340166	2455347	CulFRC58_2214	2375045	2375392	AKN78068.1	115	NA	NA	NA	NA	NA
CP011913.1	CP011913.1_CulFRC58_2239	2340166	2455347	CulFRC58_2215	2376162	2377085	AKN78069.1	307	NA	NA	NA	NA	NA
CP011913.1	CP011913.1_CulFRC58_2239	2340166	2455347	CulFRC58_2216	2377121	2378269	AKN78070.1	382	NA	NA	NA	NA	NA
CP011913.1	CP011913.1_CulFRC58_2239	2340166	2455347	CulFRC58_2217	2378266	2379027	AKN78071.1	253	NA	NA	NA	NA	NA
CP011913.1	CP011913.1_CulFRC58_2239	2340166	2455347	CulFRC58_2218	2379078	2380358	AKN78072.1	426	NA	NA	NA	NA	NA
CP011913.1	CP011913.1_CulFRC58_2239	2340166	2455347	CulFRC58_2219	2380461	2381570	AKN78073.1	369	NA	NA	NA	NA	NA
CP011913.1	CP011913.1_CulFRC58_2239	2340166	2455347	CulFRC58_2220	2381582	2383582	AKN78074.1	666	NA	NA	NA	NA	NA
CP011913.1	CP011913.1_CulFRC58_2239	2340166	2455347	CulFRC58_2221	2383796	2385355	AKN78075.1	519	NA	NA	NA	NA	NA
CP011913.1	CP011913.1_CulFRC58_2239	2340166	2455347	CulFRC58_2222	2385519	2386439	AKN78076.1	306	NA	NA	NA	NA	NA
CP011913.1	CP011913.1_CulFRC58_2239	2340166	2455347	CulFRC58_2223	2386494	2387213	AKN78077.1	239	NA	NA	NA	NA	NA
CP011913.1	CP011913.1_CulFRC58_2239	2340166	2455347	CulFRC58_2224	2387342	2388556	AKN78078.1	404	NA	NA	NA	NA	NA
CP011913.1	CP011913.1_CulFRC58_2239	2340166	2455347	CulFRC58_2225	2388568	2389038	AKN78079.1	156	NA	NA	NA	NA	NA
CP011913.1	CP011913.1_CulFRC58_2239	2340166	2455347	CulFRC58_2226	2389235	2390521	AKN78080.1	428	NA	NA	NA	NA	NA
CP011913.1	CP011913.1_CulFRC58_2239	2340166	2455347	CulFRC58_2227	2390667	2391617	AKN78081.1	316	NA	NA	NA	NA	NA
CP011913.1	CP011913.1_CulFRC58_2239	2340166	2455347	CulFRC58_2228	2391892	2392566	AKN78082.1	224	NA	NA	NA	NA	NA
CP011913.1	CP011913.1_CulFRC58_2239	2340166	2455347	CulFRC58_2229	2392603	2392824	AKN78083.1	73	NA	NA	NA	NA	NA
CP011913.1	CP011913.1_CulFRC58_2239	2340166	2455347	CulFRC58_2230	2392955	2393557	AKN78084.1	200	NA	NA	NA	NA	NA
CP011913.1	CP011913.1_CulFRC58_2239	2340166	2455347	CulFRC58_2231	2393891	2394475	AKN78085.1	194	NA	NA	NA	NA	NA
CP011913.1	CP011913.1_CulFRC58_2239	2340166	2455347	CulFRC58_2232	2394450	2395373	AKN78086.1	307	NA	NA	NA	NA	NA
CP011913.1	CP011913.1_CulFRC58_2239	2340166	2455347	CulFRC58_2233	2395467	2396678	AKN78087.1	403	NA	NA	NA	NA	NA
CP011913.1	CP011913.1_CulFRC58_2239	2340166	2455347	CulFRC58_2234	2396787	2398610	AKN78088.1	607	NA	NA	NA	NA	NA
CP011913.1	CP011913.1_CulFRC58_2239	2340166	2455347	CulFRC58_2235	2398651	2398971	AKN78089.1	106	NA	NA	NA	NA	NA
CP011913.1	CP011913.1_CulFRC58_2239	2340166	2455347	CulFRC58_2236	2398952	2400322	AKN78090.1	456	NA	NA	NA	NA	NA
CP011913.1	CP011913.1_CulFRC58_2239	2340166	2455347	CulFRC58_2237	2400365	2401912	AKN78091.1	515	NA	NA	NA	NA	NA
CP011913.1	CP011913.1_CulFRC58_2239	2340166	2455347	CulFRC58_2238	2402076	2402708	AKN78092.1	210	NA	NA	NA	NA	NA
CP011913.1	CP011913.1_CulFRC58_2239	2340166	2455347	CulFRC58_2239	2403248	2403568	AKN78093.1	106	NA	NA	NA	NA	NA
CP011913.1	CP011913.1_CulFRC58_2239	2340166	2455347	CulFRC58_2240	2403625	2404263	AKN78094.1	212	NA	Detocs__dtcB	NA	NA	NA
CP011913.1	CP011913.1_CulFRC58_2239	2340166	2455347	CulFRC58_2241	2404399	2405724	AKN78095.1	441	NA	NA	NA	NA	NA
CP011913.1	CP011913.1_CulFRC58_2239	2340166	2455347	CulFRC58_2242	2405723	2406295	AKN78096.1	190	NA	NA	NA	NA	NA
CP011913.1	CP011913.1_CulFRC58_2239	2340166	2455347	CulFRC58_2243	2406373	2406525	AKN78097.1	50	NA	NA	NA	CC	NA
CP011913.1	CP011913.1_CulFRC58_2239	2340166	2455347	CulFRC58_2244	2406526	2407413	AKN78098.1	295	NA	NA	NA	NA	NA
CP011913.1	CP011913.1_CulFRC58_2239	2340166	2455347	CulFRC58_2245	2407590	2408801	AKN78099.1	403	NA	NA	NA	NA	NA
CP011913.1	CP011913.1_CulFRC58_2239	2340166	2455347	CulFRC58_2246	2408798	2409433	AKN78100.1	211	NA	NA	NA	NA	NA
CP011913.1	CP011913.1_CulFRC58_2239	2340166	2455347	CulFRC58_2247	2409604	2410332	AKN78101.1	242	NA	NA	NA	NA	NA
CP011913.1	CP011913.1_CulFRC58_2239	2340166	2455347	CulFRC58_2248	2410389	2410646	AKN78102.1	85	NA	NA	NA	NA	NA
CP011913.1	CP011913.1_CulFRC58_2239	2340166	2455347	CulFRC58_2249	2410998	2411927	AKN78103.1	309	NA	NA	NA	NA	NA
CP011913.1	CP011913.1_CulFRC58_2239	2340166	2455347	CulFRC58_2250	2412112	2412255	AKN78104.1	47	NA	NA	NA	NA	NA
CP011913.1	CP011913.1_CulFRC58_2239	2340166	2455347	CulFRC58_2251	2412224	2413231	AKN78105.1	335	NA	NA	NA	NA	NA
CP011913.1	CP011913.1_CulFRC58_2239	2340166	2455347	CulFRC58_2252	2419298	2420347	AKN78106.1	349	NA	NA	NA	NA	NA
CP011913.1	CP011913.1_CulFRC58_2239	2340166	2455347	CulFRC58_2253	2420337	2421215	AKN78107.1	292	NA	NA	NA	NA	NA
CP011913.1	CP011913.1_CulFRC58_2239	2340166	2455347	CulFRC58_2254	2421212	2421586	AKN78108.1	124	NA	NA	NA	NA	NA
CP011913.1	CP011913.1_CulFRC58_2239	2340166	2455347	CulFRC58_2255	2421836	2423218	AKN78109.1	460	NA	NA	NA	NA	NA
CP011913.1	CP011913.1_CulFRC58_2239	2340166	2455347	CulFRC58_2256	2423322	2424194	AKN78110.1	290	NA	Type-III-B_CnuA	NA	NA	NA
CP011913.1	CP011913.1_CulFRC58_2239	2340166	2455347	CulFRC58_2257	2424204	2424353	AKN78111.1	49	NA	NA	NA	NA	NA
CP011913.1	CP011913.1_CulFRC58_2239	2340166	2455347	CulFRC58_2258	2424813	2425181	AKN78112.1	122	NA	NA	NA	NA	NA
CP011913.1	CP011913.1_CulFRC58_2239	2340166	2455347	CulFRC58_2259	2425407	2425610	AKN78113.1	67	NA	NA	NA	NA	NA
CP011913.1	CP011913.1_CulFRC58_2239	2340166	2455347	CulFRC58_2260	2425745	2428036	AKN78114.1	763	NA	NA	NA	NA	NA
CP011913.1	CP011913.1_CulFRC58_2239	2340166	2455347	CulFRC58_2261	2427972	2428349	AKN78115.1	125	NA	NA	NA	NA	NA
CP011913.1	CP011913.1_CulFRC58_2239	2340166	2455347	CulFRC58_2262	2428336	2428623	AKN78116.1	95	NA	NA	NA	NA	NA
CP011913.1	CP011913.1_CulFRC58_2239	2340166	2455347	CulFRC58_2263	2428583	2428948	AKN78117.1	121	NA	NA	NA	NA	NA
CP011913.1	CP011913.1_CulFRC58_2239	2340166	2455347	CulFRC58_2264	2428940	2429731	AKN78118.1	263	NA	NA	NA	NA	NA
CP011913.1	CP011913.1_CulFRC58_2239	2340166	2455347	CulFRC58_2265	2429986	2430270	AKN78119.1	94	NA	NA	NA	NA	NA
CP011913.1	CP011913.1_CulFRC58_2239	2340166	2455347	CulFRC58_2266	2430396	2430893	AKN78120.1	165	NA	NA	NA	NA	NA
CP011913.1	CP011913.1_CulFRC58_2239	2340166	2455347	CulFRC58_2267	2430897	2431250	AKN78121.1	117	NA	NA	NA	NA	NA
CP011913.1	CP011913.1_CulFRC58_2239	2340166	2455347	CulFRC58_2268	2431331	2432002	AKN78122.1	223	NA	NA	NA	NA	NA
CP011913.1	CP011913.1_CulFRC58_2239	2340166	2455347	CulFRC58_2269	2432309	2433661	AKN78123.1	450	NA	NA	NA	NA	NA
CP011913.1	CP011913.1_CulFRC58_2239	2340166	2455347	CulFRC58_2270	2433669	2435147	AKN78124.1	492	NA	NA	NA	NA	NA
CP011913.1	CP011913.1_CulFRC58_2239	2340166	2455347	CulFRC58_2271	2435230	2437194	AKN78125.1	654	NA	NA	NA	NA	NA
CP011913.1	CP011913.1_CulFRC58_2239	2340166	2455347	CulFRC58_2272	2437839	2438291	AKN78126.1	150	NA	NA	NA	NA	NA
CP011913.1	CP011913.1_CulFRC58_2239	2340166	2455347	CulFRC58_2273	2438392	2438958	AKN78127.1	188	NA	vcrx091	NA	NA	NA
CP011913.1	CP011913.1_CulFRC58_2239	2340166	2455347	CulFRC58_2274	2439106	2439393	AKN78128.1	95	NA	NA	NA	NA	NA
CP011913.1	CP011913.1_CulFRC58_2239	2340166	2455347	CulFRC58_2275	2439700	2439882	AKN78129.1	60	NA	NA	NA	NA	NA
CP011913.1	CP011913.1_CulFRC58_2239	2340166	2455347	CulFRC58_2276	2439882	2441423	AKN78130.1	513	NA	NA	NA	NA	NA
CP011913.1	CP011913.1_CulFRC58_2239	2340166	2455347	CulFRC58_2277	2441648	2443918	AKN78131.1	756	NA	NA	NA	NA	NA
CP011913.1	CP011913.1_CulFRC58_2239	2340166	2455347	CulFRC58_2278	2444112	2444498	AKN78132.1	128	NA	NA	NA	CC	NA
CP011913.1	CP011913.1_CulFRC58_2239	2340166	2455347	CulFRC58_2279	2444729	2445190	AKN78133.1	153	NA	NA	NA	NA	NA
CP011913.1	CP011913.1_CulFRC58_2239	2340166	2455347	CulFRC58_2280	2445275	2446252	AKN78134.1	325	NA	NA	NA	NA	NA
CP011913.1	CP011913.1_CulFRC58_2239	2340166	2455347	CulFRC58_2281	2446297	2446965	AKN78135.1	222	NA	Michele_1A_hits_grouped	NA	NA	NA
CP011913.1	CP011913.1_CulFRC58_2239	2340166	2455347	CulFRC58_2282	2446997	2447470	AKN78136.1	157	NA	NA	NA	NA	NA
CP011913.1	CP011913.1_CulFRC58_2239	2340166	2455347	CulFRC58_2283	2447480	2448418	AKN78137.1	312	NA	NA	NA	NA	NA
CP011913.1	CP011913.1_CulFRC58_2239	2340166	2455347	CulFRC58_2284	2448655	2449314	AKN78138.1	219	NA	NA	NA	NA	NA
CP011913.1	CP011913.1_CulFRC58_2239	2340166	2455347	CulFRC58_2285	2449548	2451755	AKN78139.1	735	NA	NA	NA	NA	NA
CP011913.1	CP011913.1_CulFRC58_2239	2340166	2455347	CulFRC58_2286	2451858	2452349	AKN78140.1	163	NA	NA	NA	NA	NA
CP011913.1	CP011913.1_CulFRC58_2239	2340166	2455347	CulFRC58_2287	2452412	2453233	AKN78141.1	273	NA	NA	NA	NA	NA
CP011913.1	CP011913.1_CulFRC58_2239	2340166	2455347	CulFRC58_2288	2453297	2454799	AKN78142.1	500	NA	NA	NA	NA	NA
CP011913.1	CP011913.1_CulFRC58_2239	2340166	2455347	CulFRC58_2289	2454796	2455347	AKN78143.1	183	NA	NA	NA	NA	NA
CP021417.2	CP021417.2_CBE74_11385	2378314	2497418	CBE74_11140	2378314	2379636	ARU46906.1	440	NA	NA	NA	NA	NA
CP021417.2	CP021417.2_CBE74_11385	2378314	2497418	CBE74_11145	2379767	2380792	ARU46907.1	341	NA	NA	NA	NA	NA
CP021417.2	CP021417.2_CBE74_11385	2378314	2497418	CBE74_11150	2381038	2382969	ARU46908.1	643	NA	NA	NA	NA	NA
CP021417.2	CP021417.2_CBE74_11385	2378314	2497418	CBE74_11155	2383153	2384133	ARU46909.1	326	NA	NA	NA	NA	NA
CP021417.2	CP021417.2_CBE74_11385	2378314	2497418	CBE74_11160	2384134	2384640	ARU46910.1	168	NA	NA	NA	NA	NA
CP021417.2	CP021417.2_CBE74_11385	2378314	2497418	CBE74_11165	2384633	2386624	ARU46911.1	663	NA	NA	NA	NA	NA
CP021417.2	CP021417.2_CBE74_11385	2378314	2497418	CBE74_11170	2386903	2388249	ARU46912.2	448	NA	NA	NA	NA	NA
CP021417.2	CP021417.2_CBE74_11385	2378314	2497418	CBE74_11175	2388246	2388752	ARU46913.1	168	NA	NA	NA	NA	NA
CP021417.2	CP021417.2_CBE74_11385	2378314	2497418	CBE74_11180	2388838	2390124	WCV10636.1	428	NA	NA	NA	NA	NA
CP021417.2	CP021417.2_CBE74_11385	2378314	2497418	CBE74_11185	2390117	2391301	ARU46914.1	394	NA	NA	NA	NA	NA
CP021417.2	CP021417.2_CBE74_11385	2378314	2497418	CBE74_11190	2391280	2392212	ARU46915.2	310	NA	NA	NA	NA	NA
CP021417.2	CP021417.2_CBE74_11385	2378314	2497418	CBE74_11195	2392580	2393680	WCV10637.1	366	NA	NA	NA	NA	NA
CP021417.2	CP021417.2_CBE74_11385	2378314	2497418	CBE74_11200	2393755	2395125	ARU46916.1	456	NA	NA	NA	NA	NA
CP021417.2	CP021417.2_CBE74_11385	2378314	2497418	CBE74_11205	2395510	2396706	ARU46917.1	398	NA	NA	NA	NA	NA
CP021417.2	CP021417.2_CBE74_11385	2378314	2497418	CBE74_11210	2396810	2397586	ARU46918.1	258	NA	NA	NA	NA	NA
CP021417.2	CP021417.2_CBE74_11385	2378314	2497418	CBE74_11215	2397588	2398625	ARU46919.1	345	NA	NA	NA	NA	NA
CP021417.2	CP021417.2_CBE74_11385	2378314	2497418	CBE74_11220	2398641	2399654	ARU46920.1	337	NA	NA	NA	NA	NA
CP021417.2	CP021417.2_CBE74_11385	2378314	2497418	CBE74_11225	2400127	2402148	ARU46921.1	673	NA	NA	NA	NA	NA
CP021417.2	CP021417.2_CBE74_11385	2378314	2497418	CBE74_11230	2402224	2403060	ARU46922.1	278	NA	NA	NA	NA	NA
CP021417.2	CP021417.2_CBE74_11385	2378314	2497418	CBE74_11235	2403210	2404058	ARU46923.1	282	NA	NA	NA	NA	NA
CP021417.2	CP021417.2_CBE74_11385	2378314	2497418	CBE74_11240	2404076	2405335	ARU46924.1	419	NA	NA	NA	NA	NA
CP021417.2	CP021417.2_CBE74_11385	2378314	2497418	CBE74_11245	2405400	2406173	ARU46925.1	257	NA	NA	NA	NA	NA
CP021417.2	CP021417.2_CBE74_11385	2378314	2497418	CBE74_11250	2406194	2407207	ARU46926.1	337	NA	NA	NA	NA	NA
CP021417.2	CP021417.2_CBE74_11385	2378314	2497418	CBE74_11255	2407207	2407554	ARU46927.1	115	NA	NA	NA	NA	NA
CP021417.2	CP021417.2_CBE74_11385	2378314	2497418	CBE74_11260	2407655	2408320	ARU46928.1	221	NA	NA	NA	NA	NA
CP021417.2	CP021417.2_CBE74_11385	2378314	2497418	CBE74_11265	2408324	2409247	ARU46929.1	307	NA	NA	NA	NA	NA
CP021417.2	CP021417.2_CBE74_11385	2378314	2497418	CBE74_11270	2409283	2410431	ARU47179.1	382	NA	NA	NA	NA	NA
CP021417.2	CP021417.2_CBE74_11385	2378314	2497418	CBE74_11275	2410428	2411189	ARU46930.1	253	NA	NA	NA	NA	NA
CP021417.2	CP021417.2_CBE74_11385	2378314	2497418	CBE74_11280	2411240	2412505	ARU46931.1	421	NA	NA	NA	NA	NA
CP021417.2	CP021417.2_CBE74_11385	2378314	2497418	CBE74_11285	2412609	2413694	ARU46932.1	361	NA	NA	NA	NA	NA
CP021417.2	CP021417.2_CBE74_11385	2378314	2497418	CBE74_11290	2413706	2415622	ARU46933.2	638	NA	NA	NA	NA	NA
CP021417.2	CP021417.2_CBE74_11385	2378314	2497418	CBE74_11295	2415892	2417451	WCV10638.1	519	NA	NA	NA	NA	NA
CP021417.2	CP021417.2_CBE74_11385	2378314	2497418	CBE74_11300	2417617	2418528	ARU46934.1	303	NA	NA	NA	NA	NA
CP021417.2	CP021417.2_CBE74_11385	2378314	2497418	CBE74_11305	2418592	2419311	ARU46935.1	239	NA	NA	NA	NA	NA
CP021417.2	CP021417.2_CBE74_11385	2378314	2497418	CBE74_11310	2419441	2420655	ARU46936.1	404	NA	NA	NA	NA	NA
CP021417.2	CP021417.2_CBE74_11385	2378314	2497418	CBE74_11315	2420667	2421137	ARU46937.1	156	NA	NA	NA	NA	NA
CP021417.2	CP021417.2_CBE74_11385	2378314	2497418	CBE74_11320	2421334	2422620	WCV10639.1	428	NA	NA	NA	NA	NA
CP021417.2	CP021417.2_CBE74_11385	2378314	2497418	CBE74_11325	2422765	2423715	ARU46938.1	316	NA	NA	NA	NA	NA
CP021417.2	CP021417.2_CBE74_11385	2378314	2497418	CBE74_11330	2423992	2424666	ARU46939.1	224	NA	NA	NA	NA	NA
CP021417.2	CP021417.2_CBE74_11385	2378314	2497418	CBE74_11335	2425048	2425650	ARU46940.1	200	NA	NA	NA	NA	NA
CP021417.2	CP021417.2_CBE74_11385	2378314	2497418	CBE74_11340	2425985	2426569	ARU46941.1	194	NA	NA	NA	NA	NA
CP021417.2	CP021417.2_CBE74_11385	2378314	2497418	CBE74_11345	2426544	2427503	ARU47180.2	319	NA	NA	NA	NA	NA
CP021417.2	CP021417.2_CBE74_11385	2378314	2497418	CBE74_11350	2427560	2428765	ARU46942.1	401	NA	NA	NA	NA	NA
CP021417.2	CP021417.2_CBE74_11385	2378314	2497418	CBE74_11355	2429259	2430698	NA	479	NA	NA	NA	NA	NA
CP021417.2	CP021417.2_CBE74_11385	2378314	2497418	CBE74_11360	2430706	2431022	NA	105	NA	NA	NA	NA	NA
CP021417.2	CP021417.2_CBE74_11385	2378314	2497418	CBE74_13045	2431003	2431203	WCV10815.1	66	NA	NA	NA	NA	NA
CP021417.2	CP021417.2_CBE74_11385	2378314	2497418	CBE74_11365	2431434	2431910	WCV10640.1	158	NA	NA	NA	NA	NA
CP021417.2	CP021417.2_CBE74_11385	2378314	2497418	CBE74_11370	2432005	2433375	ARU47181.1	456	NA	NA	NA	NA	NA
CP021417.2	CP021417.2_CBE74_11385	2378314	2497418	CBE74_11375	2433419	2434972	NA	517	NA	NA	NA	NA	NA
CP021417.2	CP021417.2_CBE74_11385	2378314	2497418	CBE74_11380	2435136	2435768	ARU46943.1	210	NA	NA	NA	NA	NA
CP021417.2	CP021417.2_CBE74_11385	2378314	2497418	CBE74_11385	2436301	2436621	ARU46944.1	106	NA	NA	NA	NA	NA
CP021417.2	CP021417.2_CBE74_11385	2378314	2497418	CBE74_11390	2436679	2437317	ARU46945.1	212	NA	Detocs__dtcB	NA	NA	NA
CP021417.2	CP021417.2_CBE74_11385	2378314	2497418	CBE74_11395	2437464	2438789	ARU46946.1	441	NA	NA	NA	NA	NA
CP021417.2	CP021417.2_CBE74_11385	2378314	2497418	CBE74_11400	2438788	2439360	ARU46947.1	190	NA	NA	NA	NA	NA
CP021417.2	CP021417.2_CBE74_11385	2378314	2497418	CBE74_13050	2439435	2439587	WCV10641.1	50	NA	NA	NA	NA	NA
CP021417.2	CP021417.2_CBE74_11385	2378314	2497418	CBE74_11405	2439588	2440475	ARU46948.1	295	NA	NA	NA	NA	NA
CP021417.2	CP021417.2_CBE74_11385	2378314	2497418	CBE74_11410	2440637	2441884	ARU46949.1	415	NA	NA	NA	NA	NA
CP021417.2	CP021417.2_CBE74_11385	2378314	2497418	CBE74_11415	2441881	2442507	ARU46950.2	208	NA	NA	NA	NA	NA
CP021417.2	CP021417.2_CBE74_11385	2378314	2497418	CBE74_11420	2442688	2443416	ARU46951.1	242	NA	NA	NA	NA	NA
CP021417.2	CP021417.2_CBE74_11385	2378314	2497418	CBE74_11425	2443472	2443729	ARU46952.1	85	NA	NA	NA	NA	NA
CP021417.2	CP021417.2_CBE74_11385	2378314	2497418	CBE74_11430	2444087	2444983	ARU46953.1	298	NA	NA	NA	NA	NA
CP021417.2	CP021417.2_CBE74_11385	2378314	2497418	CBE74_13055	2445199	2445342	WCV10642.1	47	NA	NA	NA	NA	NA
CP021417.2	CP021417.2_CBE74_11385	2378314	2497418	CBE74_11435	2445335	2446318	ARU46954.1	327	NA	NA	NA	NA	NA
CP021417.2	CP021417.2_CBE74_11385	2378314	2497418	CBE74_11460	2452393	2453157	WCV10643.1	254	NA	NA	NA	NA	NA
CP021417.2	CP021417.2_CBE74_11385	2378314	2497418	CBE74_13060	2453221	2453445	WCV10644.1	74	NA	NA	NA	NA	NA
CP021417.2	CP021417.2_CBE74_11385	2378314	2497418	CBE74_11465	2453435	2454316	ARU46955.1	293	NA	NA	NA	NA	NA
CP021417.2	CP021417.2_CBE74_11385	2378314	2497418	CBE74_11470	2454313	2454687	ARU46956.1	124	NA	NA	NA	NA	NA
CP021417.2	CP021417.2_CBE74_11385	2378314	2497418	CBE74_11475	2454938	2456320	ARU46957.1	460	NA	NA	NA	NA	NA
CP021417.2	CP021417.2_CBE74_11385	2378314	2497418	CBE74_11480	2456412	2457320	ARU46958.1	302	NA	Type-III-B_CnuA	NA	NA	NA
CP021417.2	CP021417.2_CBE74_11385	2378314	2497418	CBE74_11485	2458040	2458408	ARU46959.1	122	NA	NA	NA	NA	NA
CP021417.2	CP021417.2_CBE74_11385	2378314	2497418	CBE74_11490	2458634	2458837	ARU46960.1	67	NA	NA	NA	NA	NA
CP021417.2	CP021417.2_CBE74_11385	2378314	2497418	CBE74_11495	2458972	2461263	ARU46961.1	763	NA	NA	NA	NA	NA
CP021417.2	CP021417.2_CBE74_11385	2378314	2497418	CBE74_11500	2461565	2462125	WCV10645.1	186	NA	NA	NA	NA	NA
CP021417.2	CP021417.2_CBE74_11385	2378314	2497418	CBE74_11505	2462444	2463796	ARU46962.1	450	NA	NA	NA	NA	NA
CP021417.2	CP021417.2_CBE74_11385	2378314	2497418	CBE74_11510	2463806	2465284	ARU46963.1	492	NA	NA	NA	NA	NA
CP021417.2	CP021417.2_CBE74_11385	2378314	2497418	CBE74_11515	2465374	2467332	ARU46964.1	652	NA	NA	NA	NA	NA
CP021417.2	CP021417.2_CBE74_11385	2378314	2497418	CBE74_11525	2467981	2468433	ARU46965.1	150	NA	NA	NA	NA	NA
CP021417.2	CP021417.2_CBE74_11385	2378314	2497418	CBE74_11530	2468534	2469103	ARU46966.1	189	NA	vcrx091	NA	NA	NA
CP021417.2	CP021417.2_CBE74_11385	2378314	2497418	CBE74_11535	2469248	2469535	ARU46967.2	95	NA	NA	NA	NA	NA
CP021417.2	CP021417.2_CBE74_11385	2378314	2497418	CBE74_11545	2469857	2470039	ARU46968.1	60	NA	NA	NA	NA	NA
CP021417.2	CP021417.2_CBE74_11385	2378314	2497418	CBE74_11550	2470039	2471580	ARU46969.1	513	NA	NA	NA	NA	NA
CP021417.2	CP021417.2_CBE74_11385	2378314	2497418	CBE74_11555	2471827	2474109	ARU46970.1	760	NA	NA	NA	NA	NA
CP021417.2	CP021417.2_CBE74_11385	2378314	2497418	CBE74_11560	2474314	2474691	ARU46971.1	125	NA	NA	NA	CC	NA
CP021417.2	CP021417.2_CBE74_11385	2378314	2497418	CBE74_11565	2474921	2475382	ARU46972.1	153	NA	NA	NA	NA	NA
CP021417.2	CP021417.2_CBE74_11385	2378314	2497418	CBE74_11570	2475465	2476442	ARU46973.1	325	NA	NA	NA	NA	NA
CP021417.2	CP021417.2_CBE74_11385	2378314	2497418	CBE74_11575	2476484	2477154	NA	223	NA	NA	NA	NA	NA
CP021417.2	CP021417.2_CBE74_11385	2378314	2497418	CBE74_11580	2477187	2477660	ARU46974.1	157	NA	NA	NA	NA	NA
CP021417.2	CP021417.2_CBE74_11385	2378314	2497418	CBE74_11585	2477687	2478622	ARU47182.1	311	NA	NA	NA	NA	NA
CP021417.2	CP021417.2_CBE74_11385	2378314	2497418	CBE74_11590	2478868	2479527	ARU46975.1	219	NA	NA	NA	NA	NA
CP021417.2	CP021417.2_CBE74_11385	2378314	2497418	CBE74_11595	2479774	2481981	ARU46976.1	735	NA	NA	NA	NA	NA
CP021417.2	CP021417.2_CBE74_11385	2378314	2497418	CBE74_11600	2482120	2482612	NA	164	NA	NA	NA	NA	NA
CP021417.2	CP021417.2_CBE74_11385	2378314	2497418	CBE74_11605	2482675	2483496	WCV10646.1	273	NA	NA	NA	NA	NA
CP021417.2	CP021417.2_CBE74_11385	2378314	2497418	CBE74_11610	2483559	2485061	ARU46977.1	500	NA	NA	NA	NA	NA
CP021417.2	CP021417.2_CBE74_11385	2378314	2497418	CBE74_13065	2485058	2485360	WCV10647.1	100	NA	NA	NA	NA	NA
CP021417.2	CP021417.2_CBE74_11385	2378314	2497418	CBE74_13070	2485291	2485578	WCV10648.1	95	NA	NA	NA	NA	NA
CP021417.2	CP021417.2_CBE74_11385	2378314	2497418	CBE74_11620	2485757	2487700	ARU46978.1	647	NA	NA	NA	NA	NA
CP021417.2	CP021417.2_CBE74_11385	2378314	2497418	CBE74_11625	2488230	2488697	ARU46979.1	155	NA	NA	NA	NA	NA
CP021417.2	CP021417.2_CBE74_11385	2378314	2497418	CBE74_11630	2488810	2491662	ARU47183.1	950	NA	NA	NA	NA	NA
CP021417.2	CP021417.2_CBE74_11385	2378314	2497418	CBE74_11635	2492955	2493638	ARU46980.1	227	NA	NA	NA	NA	NA
CP021417.2	CP021417.2_CBE74_11385	2378314	2497418	CBE74_11640	2493635	2494687	ARU46981.1	350	NA	NA	NA	NA	NA
CP021417.2	CP021417.2_CBE74_11385	2378314	2497418	CBE74_11645	2494866	2497418	WCV10649.1	850	NA	NA	NA	NA	NA
CP046453.1	CP046453.1_CETAM_00495	46044	150760	CETAM_00245	46044	47255	QGU03342.1	403	NA	NA	NA	NA	NA
CP046453.1	CP046453.1_CETAM_00495	46044	150760	CETAM_00250	47281	47826	QGU03343.1	181	NA	NA	NA	NA	NA
CP046453.1	CP046453.1_CETAM_00495	46044	150760	CETAM_00255	47878	48849	QGU03344.1	323	NA	NA	NA	NA	NA
CP046453.1	CP046453.1_CETAM_00495	46044	150760	CETAM_00260	48952	50046	QGU03345.1	364	NA	NA	NA	NA	NA
CP046453.1	CP046453.1_CETAM_00495	46044	150760	CETAM_00265	50043	50960	QGU03346.1	305	NA	NA	NA	NA	NA
CP046453.1	CP046453.1_CETAM_00495	46044	150760	CETAM_00270	50985	52841	QGU03347.1	618	NA	PtvA	NA	NA	NA
CP046453.1	CP046453.1_CETAM_00495	46044	150760	CETAM_00275	53738	54094	QGU03348.1	118	NA	NA	NA	NA	NA
CP046453.1	CP046453.1_CETAM_00495	46044	150760	CETAM_00280	54135	54644	QGU03349.1	169	NA	NA	NA	NA	NA
CP046453.1	CP046453.1_CETAM_00495	46044	150760	CETAM_00285	54736	55839	QGU03350.1	367	NA	apyc1	NA	NA	NA
CP046453.1	CP046453.1_CETAM_00495	46044	150760	CETAM_00290	56089	57582	QGU03351.1	497	NA	NA	NA	NA	NA
CP046453.1	CP046453.1_CETAM_00495	46044	150760	CETAM_00295	57590	58351	QGU03352.1	253	NA	Michele_1A_hits_grouped	NA	NA	NA
CP046453.1	CP046453.1_CETAM_00495	46044	150760	CETAM_00300	58687	60312	QGU03353.1	541	NA	NA	NA	NA	NA
CP046453.1	CP046453.1_CETAM_00495	46044	150760	CETAM_00305	60359	61723	QGU03354.1	454	NA	NA	NA	NA	NA
CP046453.1	CP046453.1_CETAM_00495	46044	150760	CETAM_00310	61809	62291	QGU03355.1	160	NA	NA	NA	NA	NA
CP046453.1	CP046453.1_CETAM_00495	46044	150760	CETAM_00315	62342	62704	QGU03356.1	120	NA	aca4	NA	NA	NA
CP046453.1	CP046453.1_CETAM_00495	46044	150760	CETAM_00320	62701	64614	QGU03357.1	637	NA	NA	NA	NA	NA
CP046453.1	CP046453.1_CETAM_00495	46044	150760	CETAM_00325	64627	65577	QGU03358.1	316	NA	NA	NA	NA	NA
CP046453.1	CP046453.1_CETAM_00495	46044	150760	CETAM_00330	65570	67225	QGU03359.1	551	NA	NA	NA	NA	NA
CP046453.1	CP046453.1_CETAM_00495	46044	150760	CETAM_00335	68323	68856	QGU03360.1	177	NA	NA	NA	NA	NA
CP046453.1	CP046453.1_CETAM_00495	46044	150760	CETAM_00340	69397	70944	QGU03361.1	515	NA	NA	NA	CP	4-hydroxyphenylacetate 3-monooxygenase, oxygenase component
CP046453.1	CP046453.1_CETAM_00495	46044	150760	CETAM_00345	70960	71895	QGU03362.1	311	NA	NA	NA	NA	NA
CP046453.1	CP046453.1_CETAM_00495	46044	150760	CETAM_00350	71892	72596	QGU03363.1	234	NA	NA	NA	NA	NA
CP046453.1	CP046453.1_CETAM_00495	46044	150760	CETAM_00355	72600	73028	QGU03364.1	142	NA	NA	NA	PC	Ectoine synthase
CP046453.1	CP046453.1_CETAM_00495	46044	150760	CETAM_00360	73040	74593	QGU03365.1	517	NA	NA	NA	NA	NA
CP046453.1	CP046453.1_CETAM_00495	46044	150760	CETAM_00365	74635	75054	QGU03366.1	139	NA	NA	NA	NA	NA
CP046453.1	CP046453.1_CETAM_00495	46044	150760	CETAM_00370	75092	76564	QGU03367.1	490	NA	NA	NA	NA	NA
CP046453.1	CP046453.1_CETAM_00495	46044	150760	CETAM_00375	76608	77177	QGU03368.1	189	NA	NA	NA	NA	NA
CP046453.1	CP046453.1_CETAM_00495	46044	150760	CETAM_00380	77205	78392	QGU03369.1	395	NA	NA	NA	NA	NA
CP046453.1	CP046453.1_CETAM_00495	46044	150760	CETAM_00385	78474	79700	QGU03370.1	408	NA	NA	NA	NA	NA
CP046453.1	CP046453.1_CETAM_00495	46044	150760	CETAM_00390	79931	80743	QGU03371.1	270	NA	NA	NA	NA	NA
CP046453.1	CP046453.1_CETAM_00495	46044	150760	CETAM_00395	81217	82560	QGU03372.1	447	NA	NA	NA	NA	NA
CP046453.1	CP046453.1_CETAM_00495	46044	150760	CETAM_00400	82853	83158	QGU03373.1	101	NA	NA	NA	NA	NA
CP046453.1	CP046453.1_CETAM_00495	46044	150760	CETAM_00405	83228	84577	QGU03374.1	449	NA	NA	NA	NA	NA
CP046453.1	CP046453.1_CETAM_00495	46044	150760	CETAM_00410	84598	85638	QGU03375.1	346	NA	NA	NA	NA	NA
CP046453.1	CP046453.1_CETAM_00495	46044	150760	CETAM_00415	85732	86667	QGU03376.1	311	NA	NA	NA	NA	NA
CP046453.1	CP046453.1_CETAM_00495	46044	150760	CETAM_00420	86730	87107	QGU03377.1	125	NA	NA	NA	NA	NA
CP046453.1	CP046453.1_CETAM_00495	46044	150760	CETAM_00425	87107	87424	QGU03378.1	105	NA	NA	NA	NA	NA
CP046453.1	CP046453.1_CETAM_00495	46044	150760	CETAM_00430	87435	88619	QGU03379.1	394	NA	NA	NA	NA	NA
CP046453.1	CP046453.1_CETAM_00495	46044	150760	CETAM_00435	88703	89455	QGU03380.1	250	NA	NA	NA	NA	NA
CP046453.1	CP046453.1_CETAM_00495	46044	150760	CETAM_00440	89697	90425	QGU03381.1	242	NA	NA	NA	NA	NA
CP046453.1	CP046453.1_CETAM_00495	46044	150760	CETAM_00445	90394	91674	QGU03382.1	426	NA	NA	NA	NA	NA
CP046453.1	CP046453.1_CETAM_00495	46044	150760	CETAM_00450	91676	91924	QGU03383.1	82	NA	NA	NA	NA	NA
CP046453.1	CP046453.1_CETAM_00495	46044	150760	CETAM_00455	92070	93581	QGU03384.1	503	NA	NA	NA	NA	NA
CP046453.1	CP046453.1_CETAM_00495	46044	150760	CETAM_00460	93694	94266	QGU03385.1	190	NA	NA	NA	NA	NA
CP046453.1	CP046453.1_CETAM_00495	46044	150760	CETAM_00465	94425	94703	QGU03386.1	92	NA	NA	NA	NA	NA
CP046453.1	CP046453.1_CETAM_00495	46044	150760	CETAM_00470	94740	95336	QGU03387.1	198	NA	NA	NA	NA	NA
CP046453.1	CP046453.1_CETAM_00495	46044	150760	CETAM_00475	95336	96655	QGU03388.1	439	NA	NA	NA	NA	NA
CP046453.1	CP046453.1_CETAM_00495	46044	150760	CETAM_00480	97146	98000	QGU03389.1	284	NA	NA	NA	NA	NA
CP046453.1	CP046453.1_CETAM_00495	46044	150760	CETAM_00485	98480	98902	QGU03390.1	140	NA	NA	NA	NA	NA
CP046453.1	CP046453.1_CETAM_00495	46044	150760	CETAM_00490	98991	99410	QGU03391.1	139	NA	NA	NA	NA	NA
CP046453.1	CP046453.1_CETAM_00495	46044	150760	CETAM_00495	99502	99780	QGU03392.1	92	NA	NA	NA	NA	NA
CP046453.1	CP046453.1_CETAM_00495	46044	150760	CETAM_00500	99913	100116	QGU03393.1	67	NA	NA	NA	NA	NA
CP046453.1	CP046453.1_CETAM_00495	46044	150760	CETAM_00505	100429	100773	QGU03394.1	114	NA	NA	NA	NA	NA
CP046453.1	CP046453.1_CETAM_00495	46044	150760	CETAM_00510	101163	101678	QGU03395.1	171	NA	NA	NA	NA	NA
CP046453.1	CP046453.1_CETAM_00495	46044	150760	CETAM_00515	101681	102196	QGU03396.1	171	NA	NA	NA	NA	NA
CP046453.1	CP046453.1_CETAM_00495	46044	150760	CETAM_00520	102239	103243	QGU03397.1	334	NA	NA	NA	NA	NA
CP046453.1	CP046453.1_CETAM_00495	46044	150760	CETAM_00525	103246	103707	QGU03398.1	153	NA	NA	NA	NA	NA
CP046453.1	CP046453.1_CETAM_00495	46044	150760	CETAM_00530	103752	104909	QGU03399.1	385	NA	NA	NA	NA	NA
CP046453.1	CP046453.1_CETAM_00495	46044	150760	CETAM_00535	105104	106045	QGU03400.1	313	NA	NA	NA	NA	NA
CP046453.1	CP046453.1_CETAM_00495	46044	150760	CETAM_00540	106209	106919	QGU03401.1	236	NA	Michele_1A_hits_grouped	NA	NA	NA
CP046453.1	CP046453.1_CETAM_00495	46044	150760	CETAM_00545	107214	108260	QGU03402.1	348	NA	NA	NA	NA	NA
CP046453.1	CP046453.1_CETAM_00495	46044	150760	CETAM_00550	108708	109835	QGU03403.1	375	NA	NA	NA	NA	NA
CP046453.1	CP046453.1_CETAM_00495	46044	150760	CETAM_00555	110548	111687	QGU03404.1	379	NA	NA	NA	NA	NA
CP046453.1	CP046453.1_CETAM_00495	46044	150760	CETAM_00560	111747	113075	QGU03405.1	442	NA	NA	NA	NA	NA
CP046453.1	CP046453.1_CETAM_00495	46044	150760	CETAM_00565	113099	113353	QGU03406.1	84	NA	NA	NA	NA	NA
CP046453.1	CP046453.1_CETAM_00495	46044	150760	CETAM_00570	113680	114192	QGU03407.1	170	NA	NA	NA	NA	NA
CP046453.1	CP046453.1_CETAM_00495	46044	150760	CETAM_00575	114195	115226	QGU03408.1	343	NA	NA	NA	NA	NA
CP046453.1	CP046453.1_CETAM_00495	46044	150760	CETAM_00580	115229	116827	QGU03409.1	532	NA	NA	NA	NA	NA
CP046453.1	CP046453.1_CETAM_00495	46044	150760	CETAM_00585	116833	117897	QGU03410.1	354	NA	NA	NA	NA	NA
CP046453.1	CP046453.1_CETAM_00495	46044	150760	CETAM_00590	118046	118834	QGU03411.1	262	NA	NA	NA	NA	NA
CP046453.1	CP046453.1_CETAM_00495	46044	150760	CETAM_00595	118945	120435	QGU03412.1	496	NA	NA	NA	NA	NA
CP046453.1	CP046453.1_CETAM_00495	46044	150760	CETAM_00600	120518	122062	QGU03413.1	514	NA	NA	NA	NA	NA
CP046453.1	CP046453.1_CETAM_00495	46044	150760	CETAM_00605	122189	122851	QGU03414.1	220	NA	NA	NA	NA	NA
CP046453.1	CP046453.1_CETAM_00495	46044	150760	CETAM_00610	123364	124158	QGU03415.1	264	NA	NA	NA	NA	NA
CP046453.1	CP046453.1_CETAM_00495	46044	150760	CETAM_00615	124155	125123	QGU03416.1	322	NA	NA	NA	NA	NA
CP046453.1	CP046453.1_CETAM_00495	46044	150760	CETAM_00620	125116	126027	QGU03417.1	303	NA	aca6	NA	NA	NA
CP046453.1	CP046453.1_CETAM_00495	46044	150760	CETAM_00625	126066	127670	QGU03418.1	534	NA	NA	NA	NA	NA
CP046453.1	CP046453.1_CETAM_00495	46044	150760	CETAM_00630	127663	128013	QGU03419.1	116	NA	NA	NA	NA	NA
CP046453.1	CP046453.1_CETAM_00495	46044	150760	CETAM_00635	128010	128294	QGU03420.1	94	NA	NA	NA	NA	NA
CP046453.1	CP046453.1_CETAM_00495	46044	150760	CETAM_00640	128303	129166	QGU03421.1	287	NA	NA	NA	NA	NA
CP046453.1	CP046453.1_CETAM_00495	46044	150760	CETAM_00645	129163	130494	QGU03422.1	443	NA	NA	NA	NA	NA
CP046453.1	CP046453.1_CETAM_00495	46044	150760	CETAM_00650	130606	131691	QGU03423.1	361	NA	NA	NA	NA	NA
CP046453.1	CP046453.1_CETAM_00495	46044	150760	CETAM_00655	131788	132783	QGU03424.1	331	NA	NA	NA	NA	NA
CP046453.1	CP046453.1_CETAM_00495	46044	150760	CETAM_00660	132783	133022	QGU03425.1	79	NA	NA	NA	NA	NA
CP046453.1	CP046453.1_CETAM_00495	46044	150760	CETAM_00665	133095	134051	QGU03426.1	318	NA	Casp4_finished_genomes	NA	NA	NA
CP046453.1	CP046453.1_CETAM_00495	46044	150760	CETAM_00670	134093	134965	QGU03427.1	290	NA	NA	NA	NA	NA
CP046453.1	CP046453.1_CETAM_00495	46044	150760	CETAM_00675	135525	135935	QGU03428.1	136	NA	NA	NA	NA	NA
CP046453.1	CP046453.1_CETAM_00495	46044	150760	CETAM_00680	136085	137200	QGU03429.1	371	NA	NA	NA	NA	NA
CP046453.1	CP046453.1_CETAM_00495	46044	150760	CETAM_00685	137214	138143	QGU03430.1	309	NA	NA	NA	NA	NA
CP046453.1	CP046453.1_CETAM_00495	46044	150760	CETAM_00690	138254	138733	QGU03431.1	159	NA	AbiEii__AbiEi_4	NA	NA	NA
CP046453.1	CP046453.1_CETAM_00495	46044	150760	CETAM_00695	138754	139062	QGU03432.1	102	NA	NA	NA	NA	NA
CP046453.1	CP046453.1_CETAM_00495	46044	150760	CETAM_00700	139086	139628	QGU03433.1	180	NA	NA	NA	PC	GXWXG protein
CP046453.1	CP046453.1_CETAM_00495	46044	150760	CETAM_00705	139625	141121	QGU03434.1	498	NA	NA	NA	NA	NA
CP046453.1	CP046453.1_CETAM_00495	46044	150760	CETAM_00710	141137	141832	QGU03435.1	231	NA	NA	NA	NA	NA
CP046453.1	CP046453.1_CETAM_00495	46044	150760	CETAM_00715	142071	142901	QGU03436.1	276	NA	Michele_1A_hits_grouped	NA	NA	NA
CP046453.1	CP046453.1_CETAM_00495	46044	150760	CETAM_00720	142960	144114	QGU03437.1	384	NA	NA	NA	NA	NA
CP046453.1	CP046453.1_CETAM_00495	46044	150760	CETAM_00725	144160	146406	QGU03438.1	748	NA	NA	NA	NA	NA
CP046453.1	CP046453.1_CETAM_00495	46044	150760	CETAM_00730	146407	146964	QGU03439.1	185	NA	NA	NA	NA	NA
CP046453.1	CP046453.1_CETAM_00495	46044	150760	CETAM_00735	147145	148905	QGU03440.1	586	NA	NA	NA	NA	NA
CP046453.1	CP046453.1_CETAM_00495	46044	150760	CETAM_00740	148942	149988	QGU03441.1	348	NA	NA	NA	NA	NA
CP046453.1	CP046453.1_CETAM_00495	46044	150760	CETAM_00745	150224	150760	QGU03442.1	178	NA	NA	NA	NA	NA
CP046453.1	CP046453.1_CETAM_12615	2584473	2707426	CETAM_12365	2584473	2585888	QGU05704.1	471	NA	NA	NA	NA	NA
CP046453.1	CP046453.1_CETAM_12615	2584473	2707426	CETAM_12370	2585885	2586919	QGU05705.1	344	NA	NA	NA	NA	NA
CP046453.1	CP046453.1_CETAM_12615	2584473	2707426	CETAM_12375	2586937	2588046	QGU05706.1	369	NA	NA	NA	NA	NA
CP046453.1	CP046453.1_CETAM_12615	2584473	2707426	CETAM_12380	2588018	2589211	QGU05707.1	397	NA	NA	NA	NA	NA
CP046453.1	CP046453.1_CETAM_12615	2584473	2707426	CETAM_12385	2589321	2590679	QGU05708.1	452	NA	NA	NA	NA	NA
CP046453.1	CP046453.1_CETAM_12615	2584473	2707426	CETAM_12390	2590679	2591491	QGU05709.1	270	NA	NA	NA	NA	NA
CP046453.1	CP046453.1_CETAM_12615	2584473	2707426	CETAM_12395	2591520	2593043	QGU05710.1	507	NA	NA	NA	NA	NA
CP046453.1	CP046453.1_CETAM_12615	2584473	2707426	CETAM_12400	2593040	2595364	QGU05711.1	774	NA	NA	NA	NA	NA
CP046453.1	CP046453.1_CETAM_12615	2584473	2707426	CETAM_12405	2595505	2597055	QGU05712.1	516	NA	NA	NA	NA	NA
CP046453.1	CP046453.1_CETAM_12615	2584473	2707426	CETAM_12410	2597080	2601927	QGU05713.1	1615	NA	NA	NA	NA	NA
CP046453.1	CP046453.1_CETAM_12615	2584473	2707426	CETAM_12415	2602039	2603901	QGU05714.1	620	NA	NA	NA	NA	NA
CP046453.1	CP046453.1_CETAM_12615	2584473	2707426	CETAM_12420	2604040	2604954	QGU05715.1	304	NA	NA	NA	NA	NA
CP046453.1	CP046453.1_CETAM_12615	2584473	2707426	CETAM_12425	2604975	2605487	QGU05716.1	170	NA	NA	NA	NA	NA
CP046453.1	CP046453.1_CETAM_12615	2584473	2707426	CETAM_12430	2605490	2607406	QGU05717.1	638	NA	NA	NA	NA	NA
CP046453.1	CP046453.1_CETAM_12615	2584473	2707426	CETAM_12435	2607729	2608757	QGU05718.1	342	NA	NA	NA	NA	NA
CP046453.1	CP046453.1_CETAM_12615	2584473	2707426	CETAM_12440	2608935	2610914	QGU05719.1	659	NA	NA	NA	NA	NA
CP046453.1	CP046453.1_CETAM_12615	2584473	2707426	CETAM_12445	2610975	2611970	QGU05720.1	331	NA	NA	NA	NA	NA
CP046453.1	CP046453.1_CETAM_12615	2584473	2707426	CETAM_12450	2611967	2612470	QGU05721.1	167	NA	NA	NA	NA	NA
CP046453.1	CP046453.1_CETAM_12615	2584473	2707426	CETAM_12455	2612467	2614431	QGU05722.1	654	NA	NA	NA	NA	NA
CP046453.1	CP046453.1_CETAM_12615	2584473	2707426	CETAM_12460	2614534	2615943	QGU05723.1	469	NA	NA	NA	NA	NA
CP046453.1	CP046453.1_CETAM_12615	2584473	2707426	CETAM_12465	2615940	2616581	QGU05724.1	213	NA	NA	NA	NA	NA
CP046453.1	CP046453.1_CETAM_12615	2584473	2707426	CETAM_12470	2616936	2617580	QGU05725.1	214	NA	Jallet_2C_hits_grouped	NA	NA	NA
CP046453.1	CP046453.1_CETAM_12615	2584473	2707426	CETAM_12475	2617714	2618907	QGU05726.1	397	NA	NA	NA	NA	NA
CP046453.1	CP046453.1_CETAM_12615	2584473	2707426	CETAM_12480	2619104	2621143	QGU05727.1	679	NA	NA	NA	NA	NA
CP046453.1	CP046453.1_CETAM_12615	2584473	2707426	CETAM_12485	2621159	2622640	QGU05728.1	493	NA	NA	NA	NA	NA
CP046453.1	CP046453.1_CETAM_12615	2584473	2707426	CETAM_12490	2622704	2623540	QGU05729.1	278	NA	NA	NA	NA	NA
CP046453.1	CP046453.1_CETAM_12615	2584473	2707426	CETAM_12495	2623552	2624493	QGU05730.1	313	NA	NA	NA	NA	NA
CP046453.1	CP046453.1_CETAM_12615	2584473	2707426	CETAM_12500	2624496	2625755	QGU05731.1	419	NA	NA	NA	NA	NA
CP046453.1	CP046453.1_CETAM_12615	2584473	2707426	CETAM_12505	2625873	2626640	QGU05732.1	255	NA	NA	NA	NA	NA
CP046453.1	CP046453.1_CETAM_12615	2584473	2707426	CETAM_12510	2626677	2627705	QGU05733.1	342	NA	NA	NA	NA	NA
CP046453.1	CP046453.1_CETAM_12615	2584473	2707426	CETAM_12515	2627723	2628070	QGU05734.1	115	NA	NA	NA	NA	NA
CP046453.1	CP046453.1_CETAM_12615	2584473	2707426	CETAM_12520	2628089	2628775	QGU05735.1	228	NA	NA	NA	NA	NA
CP046453.1	CP046453.1_CETAM_12615	2584473	2707426	CETAM_12525	2628783	2629730	QGU05736.1	315	NA	NA	NA	NA	NA
CP046453.1	CP046453.1_CETAM_12615	2584473	2707426	CETAM_12530	2629765	2630991	QGU05737.1	408	NA	NA	NA	NA	NA
CP046453.1	CP046453.1_CETAM_12615	2584473	2707426	CETAM_12535	2630988	2631716	QGU05738.1	242	NA	NA	NA	NA	NA
CP046453.1	CP046453.1_CETAM_12615	2584473	2707426	CETAM_12540	2632090	2632968	QGU05739.1	292	NA	NA	NA	NA	NA
CP046453.1	CP046453.1_CETAM_12615	2584473	2707426	CETAM_12545	2633047	2633469	QGU05740.1	140	NA	NA	NA	NA	NA
CP046453.1	CP046453.1_CETAM_12615	2584473	2707426	CETAM_12550	2633558	2633977	QGU05741.1	139	NA	NA	NA	NA	NA
CP046453.1	CP046453.1_CETAM_12615	2584473	2707426	CETAM_12555	2634023	2634943	QGU05742.1	306	NA	NA	NA	NA	NA
CP046453.1	CP046453.1_CETAM_12615	2584473	2707426	CETAM_12560	2634966	2635682	QGU05743.1	238	NA	NA	NA	NA	NA
CP046453.1	CP046453.1_CETAM_12615	2584473	2707426	CETAM_12565	2635686	2637560	QGU05744.1	624	NA	NA	NA	NA	NA
CP046453.1	CP046453.1_CETAM_12615	2584473	2707426	CETAM_12570	2637717	2639558	QGU05745.1	613	NA	NA	NA	NA	NA
CP046453.1	CP046453.1_CETAM_12615	2584473	2707426	CETAM_12575	2639548	2641269	QGU05746.1	573	NA	NA	NA	NA	NA
CP046453.1	CP046453.1_CETAM_12615	2584473	2707426	CETAM_12580	2641340	2642122	QGU05747.1	260	NA	gcu167__gcu167B	NA	NA	NA
CP046453.1	CP046453.1_CETAM_12615	2584473	2707426	CETAM_12585	2642074	2642841	QGU05748.1	255	NA	NA	NA	NA	NA
CP046453.1	CP046453.1_CETAM_12615	2584473	2707426	CETAM_12590	2642911	2643510	QGU05749.1	199	NA	NA	NA	NA	NA
CP046453.1	CP046453.1_CETAM_12615	2584473	2707426	CETAM_12595	2643579	2644463	QGU05750.1	294	NA	NA	NA	NA	NA
CP046453.1	CP046453.1_CETAM_12615	2584473	2707426	CETAM_12600	2644534	2645724	QGU05751.1	396	NA	NA	NA	NA	NA
CP046453.1	CP046453.1_CETAM_12615	2584473	2707426	CETAM_12605	2645729	2647255	QGU05752.1	508	NA	NA	NA	NA	NA
CP046453.1	CP046453.1_CETAM_12615	2584473	2707426	CETAM_12610	2647334	2647969	QGU05753.1	211	NA	NA	NA	NA	NA
CP046453.1	CP046453.1_CETAM_12615	2584473	2707426	CETAM_12615	2648165	2648509	QGU05754.1	114	NA	NA	NA	NA	NA
CP046453.1	CP046453.1_CETAM_12615	2584473	2707426	CETAM_12620	2648729	2650024	QGU05755.1	431	NA	NA	NA	NA	NA
CP046453.1	CP046453.1_CETAM_12615	2584473	2707426	CETAM_12625	2650050	2650688	QGU05756.1	212	NA	Detocs__dtcB	NA	NA	NA
CP046453.1	CP046453.1_CETAM_12615	2584473	2707426	CETAM_12630	2650712	2651989	QGU05757.1	425	NA	NA	NA	NA	NA
CP046453.1	CP046453.1_CETAM_12615	2584473	2707426	CETAM_12635	2652207	2652572	QGU05758.1	121	NA	NA	NA	NA	NA
CP046453.1	CP046453.1_CETAM_12615	2584473	2707426	CETAM_12640	2652569	2652721	QGU05759.1	50	NA	NA	NA	NA	NA
CP046453.1	CP046453.1_CETAM_12615	2584473	2707426	CETAM_12645	2652722	2653534	QGU05760.1	270	NA	NA	NA	NA	NA
CP046453.1	CP046453.1_CETAM_12615	2584473	2707426	CETAM_12650	2653626	2654834	QGU05761.1	402	NA	NA	NA	NA	NA
CP046453.1	CP046453.1_CETAM_12615	2584473	2707426	CETAM_12655	2654761	2655393	QGU05762.1	210	NA	NA	NA	NA	NA
CP046453.1	CP046453.1_CETAM_12615	2584473	2707426	CETAM_12660	2655567	2655833	QGU05763.1	88	NA	NA	NA	NA	NA
CP046453.1	CP046453.1_CETAM_12615	2584473	2707426	CETAM_12665	2656090	2656986	QGU05764.1	298	NA	NA	NA	NA	NA
CP046453.1	CP046453.1_CETAM_12615	2584473	2707426	CETAM_12670	2657261	2658292	QGU05765.1	343	NA	NA	NA	NA	NA
CP046453.1	CP046453.1_CETAM_12615	2584473	2707426	CETAM_12675	2658358	2658609	QGU05766.1	83	NA	NA	NA	NA	NA
CP046453.1	CP046453.1_CETAM_12615	2584473	2707426	CETAM_12695	2665258	2665401	QGU05767.1	47	NA	NA	NA	NA	NA
CP046453.1	CP046453.1_CETAM_12615	2584473	2707426	CETAM_12700	2665782	2666102	QGU05768.1	106	NA	NA	NA	NA	NA
CP046453.1	CP046453.1_CETAM_12615	2584473	2707426	CETAM_12705	2666379	2666594	QGU05769.1	71	NA	NA	NA	NA	NA
CP046453.1	CP046453.1_CETAM_12615	2584473	2707426	CETAM_12710	2666581	2667894	QGU05770.1	437	NA	NA	NA	NA	NA
CP046453.1	CP046453.1_CETAM_12615	2584473	2707426	CETAM_12715	2668623	2668871	QGU05771.1	82	NA	NA	NA	NA	NA
CP046453.1	CP046453.1_CETAM_12615	2584473	2707426	CETAM_12720	2668977	2669477	QGU05772.1	166	NA	NA	NA	CP	Ligand-binding SRPBCC domain
CP046453.1	CP046453.1_CETAM_12615	2584473	2707426	CETAM_12725	2669612	2669737	QGU05773.1	41	NA	NA	NA	NA	NA
CP046453.1	CP046453.1_CETAM_12615	2584473	2707426	CETAM_12745	2676217	2676591	QGU05774.1	124	NA	NA	NA	NA	NA
CP046453.1	CP046453.1_CETAM_12615	2584473	2707426	CETAM_12750	2676735	2677997	QGU05775.1	420	NA	NA	NA	NA	NA
CP046453.1	CP046453.1_CETAM_12615	2584473	2707426	CETAM_12755	2678004	2678870	QGU05776.1	288	NA	NA	NA	NA	NA
CP046453.1	CP046453.1_CETAM_12615	2584473	2707426	CETAM_12760	2679044	2679427	QGU05777.1	127	NA	NA	NA	NA	NA
CP046453.1	CP046453.1_CETAM_12615	2584473	2707426	CETAM_12765	2679571	2679777	QGU05778.1	68	NA	NA	NA	NA	NA
CP046453.1	CP046453.1_CETAM_12615	2584473	2707426	CETAM_12770	2679853	2680059	QGU05779.1	68	NA	NA	NA	NA	NA
CP046453.1	CP046453.1_CETAM_12615	2584473	2707426	CETAM_12775	2680179	2682452	QGU05780.1	757	NA	NA	NA	NA	NA
CP046453.1	CP046453.1_CETAM_12615	2584473	2707426	CETAM_12780	2682497	2683837	QGU05781.1	446	NA	NA	NA	NA	NA
CP046453.1	CP046453.1_CETAM_12615	2584473	2707426	CETAM_12785	2683843	2684013	QGU05782.1	56	NA	NA	NA	NA	NA
CP046453.1	CP046453.1_CETAM_12615	2584473	2707426	CETAM_12790	2684391	2685572	QGU05783.1	393	NA	NA	NA	NA	NA
CP046453.1	CP046453.1_CETAM_12615	2584473	2707426	CETAM_12795	2685767	2687260	QGU05784.1	497	NA	NA	NA	NA	NA
CP046453.1	CP046453.1_CETAM_12615	2584473	2707426	CETAM_12800	2687838	2688290	QGU05785.1	150	NA	NA	NA	NA	NA
CP046453.1	CP046453.1_CETAM_12615	2584473	2707426	CETAM_12805	2688388	2689014	QGU05786.1	208	NA	vcrx091	NA	NA	NA
CP046453.1	CP046453.1_CETAM_12615	2584473	2707426	CETAM_12810	2689101	2689388	QGU05787.1	95	NA	NA	NA	NA	NA
CP046453.1	CP046453.1_CETAM_12615	2584473	2707426	CETAM_12815	2689525	2689722	QGU05788.1	65	NA	NA	NA	NA	NA
CP046453.1	CP046453.1_CETAM_12615	2584473	2707426	CETAM_12820	2689730	2691157	QGU05789.1	475	NA	NA	NA	NA	NA
CP046453.1	CP046453.1_CETAM_12615	2584473	2707426	CETAM_12825	2691172	2693391	QGU05790.1	739	NA	NA	NA	NA	NA
CP046453.1	CP046453.1_CETAM_12615	2584473	2707426	CETAM_12830	2693499	2693873	QGU05791.1	124	NA	NA	NA	CC	NA
CP046453.1	CP046453.1_CETAM_12615	2584473	2707426	CETAM_12835	2694043	2695134	QGU05792.1	363	NA	NA	NA	NA	NA
CP046453.1	CP046453.1_CETAM_12615	2584473	2707426	CETAM_12840	2695170	2695631	QGU05793.1	153	NA	Lamassu-Fam__LmuC_acc_Mrr	NA	NA	NA
CP046453.1	CP046453.1_CETAM_12615	2584473	2707426	CETAM_12845	2695680	2696627	QGU05794.1	315	NA	NA	NA	NA	NA
CP046453.1	CP046453.1_CETAM_12615	2584473	2707426	CETAM_12850	2696652	2697182	QGU05795.1	176	NA	NA	NA	NA	NA
CP046453.1	CP046453.1_CETAM_12615	2584473	2707426	CETAM_12855	2697189	2698103	QGU05796.1	304	NA	NA	NA	NA	NA
CP046453.1	CP046453.1_CETAM_12615	2584473	2707426	CETAM_12860	2698202	2699080	QGU05797.1	292	NA	NA	NA	NA	NA
CP046453.1	CP046453.1_CETAM_12615	2584473	2707426	CETAM_12865	2699110	2700603	QGU05798.1	497	NA	NA	NA	NA	NA
CP046453.1	CP046453.1_CETAM_12615	2584473	2707426	CETAM_12870	2700723	2701541	QGU05799.1	272	NA	NA	NA	NA	NA
CP046453.1	CP046453.1_CETAM_12615	2584473	2707426	CETAM_12875	2701552	2703204	QGU05800.1	550	NA	NA	NA	NA	NA
CP046453.1	CP046453.1_CETAM_12615	2584473	2707426	CETAM_12880	2703201	2704538	QGU05801.1	445	NA	NA	NA	NA	NA
CP046453.1	CP046453.1_CETAM_12615	2584473	2707426	CETAM_12885	2704583	2705890	QGU05802.1	435	NA	NA	NA	NA	NA
CP046453.1	CP046453.1_CETAM_12615	2584473	2707426	CETAM_12890	2706126	2706752	QGU05803.1	208	NA	NA	NA	NA	NA
CP046453.1	CP046453.1_CETAM_12615	2584473	2707426	CETAM_12895	2706995	2707426	QGU05804.1	143	NA	NA	NA	NA	NA
CP063189.1	CP063189.1_CMASS_09870	2086851	2207402	CMASS_09620	2086851	2087618	WCZ33335.1	255	NA	NA	NA	NA	NA
CP063189.1	CP063189.1_CMASS_09870	2086851	2207402	CMASS_09625	2087667	2088692	WCZ33336.1	341	NA	NA	NA	NA	NA
CP063189.1	CP063189.1_CMASS_09870	2086851	2207402	CMASS_09630	2089059	2090360	WCZ33337.1	433	NA	NA	NA	NA	NA
CP063189.1	CP063189.1_CMASS_09870	2086851	2207402	CMASS_09635	2090563	2092392	WCZ33338.1	609	NA	NA	NA	NA	NA
CP063189.1	CP063189.1_CMASS_09870	2086851	2207402	CMASS_09640	2092681	2093439	WCZ33339.1	252	NA	NA	NA	NA	NA
CP063189.1	CP063189.1_CMASS_09870	2086851	2207402	CMASS_09645	2093440	2094033	WCZ33340.1	197	NA	NA	NA	CP	TIGR00288 family protein
CP063189.1	CP063189.1_CMASS_09870	2086851	2207402	CMASS_09650	2094052	2096274	WCZ33341.1	740	NA	NA	NA	NA	NA
CP063189.1	CP063189.1_CMASS_09870	2086851	2207402	CMASS_09655	2096277	2097317	WCZ33342.1	346	NA	NA	NA	CP	Uncharacterized membrane protein YbhN, UPF0104 family
CP063189.1	CP063189.1_CMASS_09870	2086851	2207402	CMASS_09660	2097314	2097670	WCZ33343.1	118	NA	NA	NA	NA	NA
CP063189.1	CP063189.1_CMASS_09870	2086851	2207402	CMASS_09665	2097674	2097775	WCZ33344.1	33	NA	NA	NA	NA	NA
CP063189.1	CP063189.1_CMASS_09870	2086851	2207402	CMASS_09670	2097854	2099401	WCZ33345.1	515	NA	NA	NA	NA	NA
CP063189.1	CP063189.1_CMASS_09870	2086851	2207402	CMASS_09675	2099373	2104169	WCZ33346.1	1598	NA	NA	NA	NA	NA
CP063189.1	CP063189.1_CMASS_09870	2086851	2207402	CMASS_09680	2104253	2106085	WCZ33347.1	610	NA	NA	NA	NA	NA
CP063189.1	CP063189.1_CMASS_09870	2086851	2207402	CMASS_09685	2106198	2107136	WCZ33348.1	312	NA	NA	NA	NA	NA
CP063189.1	CP063189.1_CMASS_09870	2086851	2207402	CMASS_09690	2107192	2107782	WCZ33349.1	196	NA	NA	NA	NA	NA
CP063189.1	CP063189.1_CMASS_09870	2086851	2207402	CMASS_09695	2107798	2109759	WCZ33350.1	653	NA	NA	NA	NA	NA
CP063189.1	CP063189.1_CMASS_09870	2086851	2207402	CMASS_09700	2110043	2111065	WCZ33351.1	340	NA	NA	NA	NA	NA
CP063189.1	CP063189.1_CMASS_09870	2086851	2207402	CMASS_09705	2111229	2112980	WCZ33352.1	583	NA	NA	NA	NA	NA
CP063189.1	CP063189.1_CMASS_09870	2086851	2207402	CMASS_09710	2113013	2114077	WCZ33353.1	354	NA	NA	NA	NA	NA
CP063189.1	CP063189.1_CMASS_09870	2086851	2207402	CMASS_09715	2114074	2114589	WCZ33354.1	171	NA	NA	NA	NA	NA
CP063189.1	CP063189.1_CMASS_09870	2086851	2207402	CMASS_09720	2114594	2116549	WCZ33355.1	651	NA	NA	NA	NA	NA
CP063189.1	CP063189.1_CMASS_09870	2086851	2207402	CMASS_09725	2116735	2118198	WCZ33356.1	487	NA	NA	NA	NA	NA
CP063189.1	CP063189.1_CMASS_09870	2086851	2207402	CMASS_09730	2118291	2118881	WCZ33357.1	196	NA	NA	NA	NA	NA
CP063189.1	CP063189.1_CMASS_09870	2086851	2207402	CMASS_09735	2119063	2119665	WCZ33358.1	200	NA	NA	NA	NA	NA
CP063189.1	CP063189.1_CMASS_09870	2086851	2207402	CMASS_09740	2120360	2121565	WCZ33359.1	401	NA	NA	NA	NA	NA
CP063189.1	CP063189.1_CMASS_09870	2086851	2207402	CMASS_09745	2121792	2123933	WCZ33360.1	713	NA	NA	NA	NA	NA
CP063189.1	CP063189.1_CMASS_09870	2086851	2207402	CMASS_09750	2123940	2124689	WCZ33361.1	249	NA	NA	NA	NA	NA
CP063189.1	CP063189.1_CMASS_09870	2086851	2207402	CMASS_09755	2124682	2125512	WCZ33362.1	276	NA	NA	NA	NA	NA
CP063189.1	CP063189.1_CMASS_09870	2086851	2207402	CMASS_09760	2125512	2126510	WCZ33363.1	332	NA	NA	NA	NA	NA
CP063189.1	CP063189.1_CMASS_09870	2086851	2207402	CMASS_09765	2126510	2127547	WCZ33364.1	345	NA	NA	NA	NA	NA
CP063189.1	CP063189.1_CMASS_09870	2086851	2207402	CMASS_09770	2127548	2128486	WCZ33365.1	312	NA	NA	NA	PC	N-acetyl-alpha-D-glucosaminyl L-malate synthase BshA
CP063189.1	CP063189.1_CMASS_09870	2086851	2207402	CMASS_09775	2128581	2129531	WCZ33366.1	316	NA	NA	NA	NA	NA
CP063189.1	CP063189.1_CMASS_09870	2086851	2207402	CMASS_09780	2129532	2131676	WCZ33367.1	714	NA	NA	NA	NA	NA
CP063189.1	CP063189.1_CMASS_09870	2086851	2207402	CMASS_09785	2131570	2133195	WCZ33368.1	541	NA	NA	NA	NA	NA
CP063189.1	CP063189.1_CMASS_09870	2086851	2207402	CMASS_09790	2133354	2134184	WCZ33369.1	276	NA	NA	NA	NA	NA
CP063189.1	CP063189.1_CMASS_09870	2086851	2207402	CMASS_09795	2134197	2135048	WCZ33370.1	283	NA	NA	NA	NA	NA
CP063189.1	CP063189.1_CMASS_09870	2086851	2207402	CMASS_09800	2135052	2136308	WCZ33371.1	418	NA	NA	NA	NA	NA
CP063189.1	CP063189.1_CMASS_09870	2086851	2207402	CMASS_09805	2136371	2137456	WCZ33372.1	361	NA	NA	NA	NA	NA
CP063189.1	CP063189.1_CMASS_09870	2086851	2207402	CMASS_09810	2137443	2137790	WCZ33373.1	115	NA	NA	NA	NA	NA
CP063189.1	CP063189.1_CMASS_09870	2086851	2207402	CMASS_09815	2137804	2138928	WCZ33374.1	374	NA	NA	NA	NA	NA
CP063189.1	CP063189.1_CMASS_09870	2086851	2207402	CMASS_09820	2138925	2139629	WCZ33375.1	234	NA	NA	NA	NA	NA
CP063189.1	CP063189.1_CMASS_09870	2086851	2207402	CMASS_09825	2139657	2141165	WCZ33376.1	502	NA	NA	NA	NA	NA
CP063189.1	CP063189.1_CMASS_09870	2086851	2207402	CMASS_09830	2141249	2142166	WCZ33377.1	305	NA	NA	NA	NA	NA
CP063189.1	CP063189.1_CMASS_09870	2086851	2207402	CMASS_09835	2142194	2142901	WCZ33378.1	235	NA	NA	NA	NA	NA
CP063189.1	CP063189.1_CMASS_09870	2086851	2207402	CMASS_09840	2143006	2144838	WCZ33379.1	610	NA	NA	NA	NA	NA
CP063189.1	CP063189.1_CMASS_09870	2086851	2207402	CMASS_09845	2144840	2145490	WCZ33380.1	216	NA	NA	NA	NA	NA
CP063189.1	CP063189.1_CMASS_09870	2086851	2207402	CMASS_09850	2145641	2146246	WCZ33381.1	201	NA	NA	NA	NA	NA
CP063189.1	CP063189.1_CMASS_09870	2086851	2207402	CMASS_09855	2146351	2147661	WCZ33382.1	436	NA	NA	NA	NA	NA
CP063189.1	CP063189.1_CMASS_09870	2086851	2207402	CMASS_09860	2147633	2149207	WCZ33383.1	524	NA	NA	NA	NA	NA
CP063189.1	CP063189.1_CMASS_09870	2086851	2207402	CMASS_09865	2149240	2149878	WCZ33384.1	212	NA	NA	NA	NA	NA
CP063189.1	CP063189.1_CMASS_09870	2086851	2207402	CMASS_09870	2150116	2150451	WCZ33385.1	111	NA	NA	NA	NA	NA
CP063189.1	CP063189.1_CMASS_09870	2086851	2207402	CMASS_09875	2150448	2151086	WCZ33386.1	212	NA	Detocs__dtcB	NA	NA	NA
CP063189.1	CP063189.1_CMASS_09870	2086851	2207402	CMASS_09880	2151138	2152334	WCZ33387.1	398	NA	NA	NA	NA	NA
CP063189.1	CP063189.1_CMASS_09870	2086851	2207402	CMASS_09885	2152405	2153661	WCZ33388.1	418	NA	NA	NA	NA	NA
CP063189.1	CP063189.1_CMASS_09870	2086851	2207402	CMASS_09890	2153882	2155132	WCZ33389.1	416	NA	NA	NA	NA	NA
CP063189.1	CP063189.1_CMASS_09870	2086851	2207402	CMASS_09895	2155553	2156161	WCZ33390.1	202	NA	NA	NA	NA	NA
CP063189.1	CP063189.1_CMASS_09870	2086851	2207402	CMASS_09900	2156453	2156764	WCZ33391.1	103	NA	NA	NA	NA	NA
CP063189.1	CP063189.1_CMASS_09870	2086851	2207402	CMASS_09905	2156964	2157857	WCZ33392.1	297	NA	NA	NA	NA	NA
CP063189.1	CP063189.1_CMASS_09870	2086851	2207402	CMASS_09910	2157929	2158075	WCZ33393.1	48	NA	NA	NA	NA	NA
CP063189.1	CP063189.1_CMASS_09870	2086851	2207402	CMASS_09915	2158119	2159048	WCZ33394.1	309	NA	NA	NA	NA	NA
CP063189.1	CP063189.1_CMASS_09870	2086851	2207402	CMASS_09920	2159045	2159509	WCZ33395.1	154	NA	NA	NA	NA	NA
CP063189.1	CP063189.1_CMASS_09870	2086851	2207402	CMASS_09940	2166252	2166626	WCZ33396.1	124	NA	NA	NA	NA	NA
CP063189.1	CP063189.1_CMASS_09870	2086851	2207402	CMASS_09945	2166832	2168232	WCZ33397.1	466	NA	NA	NA	NA	NA
CP063189.1	CP063189.1_CMASS_09870	2086851	2207402	CMASS_09950	2168280	2169164	WCZ33398.1	294	NA	NA	NA	NA	NA
CP063189.1	CP063189.1_CMASS_09870	2086851	2207402	CMASS_09955	2169189	2169587	WCZ33399.1	132	NA	NA	NA	NA	NA
CP063189.1	CP063189.1_CMASS_09870	2086851	2207402	CMASS_09960	2169742	2169945	WCZ33400.1	67	NA	NA	NA	NA	NA
CP063189.1	CP063189.1_CMASS_09870	2086851	2207402	CMASS_09965	2169949	2172195	WCZ33401.1	748	NA	NA	NA	NA	NA
CP063189.1	CP063189.1_CMASS_09870	2086851	2207402	CMASS_09970	2172229	2173680	WCZ33402.1	483	NA	NA	NA	NA	NA
CP063189.1	CP063189.1_CMASS_09870	2086851	2207402	CMASS_09975	2174202	2174654	WCZ33403.1	150	NA	NA	NA	NA	NA
CP063189.1	CP063189.1_CMASS_09870	2086851	2207402	CMASS_09980	2174708	2175286	WCZ33404.1	192	NA	vcrx091	NA	NA	NA
CP063189.1	CP063189.1_CMASS_09870	2086851	2207402	CMASS_09985	2175354	2175644	WCZ33405.1	96	NA	NA	NA	NA	NA
CP063189.1	CP063189.1_CMASS_09870	2086851	2207402	CMASS_09990	2175847	2177250	WCZ33406.1	467	NA	NA	NA	NA	NA
CP063189.1	CP063189.1_CMASS_09870	2086851	2207402	CMASS_09995	2177357	2179684	WCZ33407.1	775	NA	NA	NA	NA	NA
CP063189.1	CP063189.1_CMASS_09870	2086851	2207402	CMASS_10000	2179778	2180158	WCZ33408.1	126	NA	NA	NA	NA	NA
CP063189.1	CP063189.1_CMASS_09870	2086851	2207402	CMASS_10005	2180268	2180777	WCZ33409.1	169	NA	Lamassu-Fam__LmuC_acc_Mrr	NA	NA	NA
CP063189.1	CP063189.1_CMASS_09870	2086851	2207402	CMASS_10010	2180788	2181771	WCZ33410.1	327	NA	NA	NA	NA	NA
CP063189.1	CP063189.1_CMASS_09870	2086851	2207402	CMASS_10015	2181768	2182229	WCZ33411.1	153	NA	NA	NA	NA	NA
CP063189.1	CP063189.1_CMASS_09870	2086851	2207402	CMASS_10020	2182249	2183736	WCZ33412.1	495	NA	NA	NA	NA	NA
CP063189.1	CP063189.1_CMASS_09870	2086851	2207402	CMASS_10025	2183733	2184647	WCZ33413.1	304	NA	NA	NA	NA	NA
CP063189.1	CP063189.1_CMASS_09870	2086851	2207402	CMASS_10030	2184666	2186162	WCZ33414.1	498	NA	NA	NA	NA	NA
CP063189.1	CP063189.1_CMASS_09870	2086851	2207402	CMASS_10035	2186235	2187035	WCZ33415.1	266	NA	NA	NA	NA	NA
CP063189.1	CP063189.1_CMASS_09870	2086851	2207402	CMASS_10040	2187054	2187257	WCZ33416.1	67	NA	NA	NA	NA	NA
CP063189.1	CP063189.1_CMASS_09870	2086851	2207402	CMASS_10045	2187379	2188530	WCZ33417.1	383	NA	NA	NA	NA	NA
CP063189.1	CP063189.1_CMASS_09870	2086851	2207402	CMASS_10050	2188550	2189224	WCZ33418.1	224	NA	NA	NA	NA	NA
CP063189.1	CP063189.1_CMASS_09870	2086851	2207402	CMASS_10055	2189226	2190269	WCZ33419.1	347	NA	NA	NA	NA	NA
CP063189.1	CP063189.1_CMASS_09870	2086851	2207402	CMASS_10060	2190381	2191574	WCZ33420.1	397	NA	NA	NA	NA	NA
CP063189.1	CP063189.1_CMASS_09870	2086851	2207402	CMASS_10065	2191561	2192154	WCZ33421.1	197	NA	NA	NA	NA	NA
CP063189.1	CP063189.1_CMASS_09870	2086851	2207402	CMASS_10075	2193104	2193460	WCZ33422.1	118	NA	NA	NA	NA	NA
CP063189.1	CP063189.1_CMASS_09870	2086851	2207402	CMASS_10080	2193528	2194079	WCZ33423.1	183	NA	NA	NA	NA	NA
CP063189.1	CP063189.1_CMASS_09870	2086851	2207402	CMASS_10085	2194222	2195265	WCZ33424.1	347	NA	NA	NA	NA	NA
CP063189.1	CP063189.1_CMASS_09870	2086851	2207402	CMASS_10090	2195269	2195787	WCZ33425.1	172	NA	NA	NA	NA	NA
CP063189.1	CP063189.1_CMASS_09870	2086851	2207402	CMASS_10095	2195836	2196582	WCZ33426.1	248	NA	NA	NA	NA	NA
CP063189.1	CP063189.1_CMASS_09870	2086851	2207402	CMASS_10100	2196681	2197661	WCZ33427.1	326	NA	NA	NA	NA	NA
CP063189.1	CP063189.1_CMASS_09870	2086851	2207402	CMASS_10105	2197764	2198111	WCZ33428.1	115	NA	NA	NA	NA	NA
CP063189.1	CP063189.1_CMASS_09870	2086851	2207402	CMASS_10110	2198248	2199504	WCZ33429.1	418	NA	NA	NA	NA	NA
CP063189.1	CP063189.1_CMASS_09870	2086851	2207402	CMASS_10115	2199501	2199626	WCZ33430.1	41	NA	NA	NA	NA	NA
CP063189.1	CP063189.1_CMASS_09870	2086851	2207402	CMASS_10120	2199752	2201056	WCZ33431.1	434	NA	NA	NA	NA	NA
CP063189.1	CP063189.1_CMASS_09870	2086851	2207402	CMASS_10125	2201135	2203969	WCZ33432.1	944	NA	NA	NA	NA	NA
CP063189.1	CP063189.1_CMASS_09870	2086851	2207402	CMASS_10130	2204138	2204713	WCZ33433.1	191	NA	NA	NA	NA	NA
CP063189.1	CP063189.1_CMASS_09870	2086851	2207402	CMASS_10135	2204710	2206413	WCZ33434.1	567	NA	NA	NA	NA	NA
CP063189.1	CP063189.1_CMASS_09870	2086851	2207402	CMASS_10140	2206530	2207402	WCZ33435.1	290	NA	NA	NA	NA	NA
CP126969.1	CP126969.1_QP027_10775	2181947	2288805	QP027_10525	2181947	2182492	WIM67520.1	181	NA	NA	NA	NA	NA
CP126969.1	CP126969.1_QP027_10775	2181947	2288805	QP027_10530	2182496	2183317	WIM67521.1	273	NA	NA	NA	NA	NA
CP126969.1	CP126969.1_QP027_10775	2181947	2288805	QP027_10535	2183318	2184211	WIM67522.1	297	NA	NA	NA	NA	NA
CP126969.1	CP126969.1_QP027_10775	2181947	2288805	QP027_10540	2184212	2185470	NA	419	NA	NA	NA	NA	NA
CP126969.1	CP126969.1_QP027_10775	2181947	2288805	QP027_10545	2185583	2186359	WIM67523.1	258	NA	AbiEii__AbiEi_4	NA	NA	NA
CP126969.1	CP126969.1_QP027_10775	2181947	2288805	QP027_10550	2186372	2187391	WIM67524.1	339	NA	NA	NA	NA	NA
CP126969.1	CP126969.1_QP027_10775	2181947	2288805	QP027_10555	2187400	2187747	WIM69073.1	115	NA	NA	NA	NA	NA
CP126969.1	CP126969.1_QP027_10775	2181947	2288805	QP027_10560	2187744	2188337	WIM67525.1	197	NA	NA	NA	NA	NA
CP126969.1	CP126969.1_QP027_10775	2181947	2288805	QP027_10565	2188343	2189272	WIM67526.1	309	NA	NA	NA	NA	NA
CP126969.1	CP126969.1_QP027_10775	2181947	2288805	QP027_10570	2189288	2189995	WIM67527.1	235	NA	NA	NA	NA	NA
CP126969.1	CP126969.1_QP027_10775	2181947	2288805	QP027_10575	2190053	2191339	WIM67528.1	428	NA	NA	NA	NA	NA
CP126969.1	CP126969.1_QP027_10775	2181947	2288805	QP027_10580	2191492	2192625	WIM67529.1	377	NA	NA	NA	NA	NA
CP126969.1	CP126969.1_QP027_10775	2181947	2288805	QP027_10585	2192668	2193978	WIM67530.1	436	NA	NA	NA	NA	NA
CP126969.1	CP126969.1_QP027_10775	2181947	2288805	QP027_10590	2194043	2194972	WIM67531.1	309	NA	NA	NA	NA	NA
CP126969.1	CP126969.1_QP027_10775	2181947	2288805	QP027_10595	2194972	2195922	WIM67532.1	316	NA	NA	NA	NA	NA
CP126969.1	CP126969.1_QP027_10775	2181947	2288805	QP027_10600	2196094	2196999	WIM67533.1	301	NA	NA	NA	NA	NA
CP126969.1	CP126969.1_QP027_10775	2181947	2288805	QP027_10605	2197010	2197723	WIM67534.1	237	NA	NA	NA	NA	NA
CP126969.1	CP126969.1_QP027_10775	2181947	2288805	QP027_10610	2197720	2199579	WIM67535.1	619	NA	NA	NA	NA	NA
CP126969.1	CP126969.1_QP027_10775	2181947	2288805	QP027_10615	2199668	2200612	WIM67536.1	314	NA	NA	NA	NA	NA
CP126969.1	CP126969.1_QP027_10775	2181947	2288805	QP027_10620	2200801	2202732	WIM67537.1	643	NA	NA	NA	NA	NA
CP126969.1	CP126969.1_QP027_10775	2181947	2288805	QP027_10625	2202620	2204236	WIM69074.1	538	NA	NA	NA	NA	NA
CP126969.1	CP126969.1_QP027_10775	2181947	2288805	QP027_10630	2205088	2206307	WIM67538.1	406	NA	NA	NA	NA	NA
CP126969.1	CP126969.1_QP027_10775	2181947	2288805	QP027_10635	2207225	2207365	NA	47	NA	NA	NA	NA	NA
CP126969.1	CP126969.1_QP027_10775	2181947	2288805	QP027_10640	2207441	2208704	WIM67539.1	421	NA	aca1	NA	NA	NA
CP126969.1	CP126969.1_QP027_10775	2181947	2288805	QP027_10645	2208763	2209206	WIM67540.1	147	NA	NA	NA	NA	NA
CP126969.1	CP126969.1_QP027_10775	2181947	2288805	QP027_10650	2209903	2210259	WIM67541.1	118	NA	NA	NA	NA	NA
CP126969.1	CP126969.1_QP027_10775	2181947	2288805	QP027_10655	2210266	2210547	WIM67542.1	93	NA	NA	NA	NA	NA
CP126969.1	CP126969.1_QP027_10775	2181947	2288805	QP027_10660	2211528	2212379	WIM67543.1	283	NA	NA	NA	NA	NA
CP126969.1	CP126969.1_QP027_10775	2181947	2288805	QP027_10665	2212611	2213660	NA	348	NA	NA	NA	NA	NA
CP126969.1	CP126969.1_QP027_10775	2181947	2288805	QP027_10670	2213701	2214965	WIM67544.1	421	NA	aca1	NA	NA	NA
CP126969.1	CP126969.1_QP027_10775	2181947	2288805	QP027_10675	2215296	2216192	WIM67545.1	298	NA	NA	NA	NA	NA
CP126969.1	CP126969.1_QP027_10775	2181947	2288805	QP027_10680	2216199	2216840	WIM67546.1	213	NA	NA	NA	NA	NA
CP126969.1	CP126969.1_QP027_10775	2181947	2288805	QP027_10685	2216978	2217580	WIM67547.1	200	NA	NA	NA	NA	NA
CP126969.1	CP126969.1_QP027_10775	2181947	2288805	QP027_10690	2218340	2219055	NA	238	NA	NA	NA	NA	NA
CP126969.1	CP126969.1_QP027_10775	2181947	2288805	QP027_10695	2219281	2220261	WIM67548.1	326	NA	NA	NA	NA	NA
CP126969.1	CP126969.1_QP027_10775	2181947	2288805	QP027_10700	2220399	2221607	WIM67549.1	402	NA	NA	NA	NA	NA
CP126969.1	CP126969.1_QP027_10775	2181947	2288805	QP027_10705	2221637	2222152	WIM67550.1	171	NA	NA	NA	NA	NA
CP126969.1	CP126969.1_QP027_10775	2181947	2288805	QP027_10710	2222235	2223206	WIM67551.1	323	NA	NA	NA	NA	NA
CP126969.1	CP126969.1_QP027_10775	2181947	2288805	QP027_10715	2223309	2224403	WIM69075.1	364	NA	NA	NA	NA	NA
CP126969.1	CP126969.1_QP027_10775	2181947	2288805	QP027_10720	2224400	2225323	WIM67552.1	307	NA	NA	NA	NA	NA
CP126969.1	CP126969.1_QP027_10775	2181947	2288805	QP027_10725	2225329	2227179	WIM67553.1	616	NA	PtvA	NA	NA	NA
CP126969.1	CP126969.1_QP027_10775	2181947	2288805	QP027_10730	2227413	2227493	NA	27	NA	NA	NA	NA	NA
CP126969.1	CP126969.1_QP027_10775	2181947	2288805	QP027_10735	2227538	2227865	NA	109	NA	NA	NA	NA	NA
CP126969.1	CP126969.1_QP027_10775	2181947	2288805	QP027_10740	2228438	2228890	WIM67554.1	150	NA	NA	NA	NA	NA
CP126969.1	CP126969.1_QP027_10775	2181947	2288805	QP027_10745	2228950	2229621	WIM67555.1	223	NA	NA	NA	NA	NA
CP126969.1	CP126969.1_QP027_10775	2181947	2288805	QP027_10750	2229764	2230207	WIM67556.1	147	NA	NA	NA	NA	NA
CP126969.1	CP126969.1_QP027_10775	2181947	2288805	QP027_10755	2230165	2231046	WIM67557.1	293	NA	NA	NA	NA	NA
CP126969.1	CP126969.1_QP027_10775	2181947	2288805	QP027_10760	2231118	2232290	WIM67558.1	390	NA	NA	NA	NA	NA
CP126969.1	CP126969.1_QP027_10775	2181947	2288805	QP027_10765	2232287	2233783	WIM67559.1	498	NA	NA	NA	NA	NA
CP126969.1	CP126969.1_QP027_10775	2181947	2288805	QP027_10770	2233862	2234497	WIM67560.1	211	NA	NA	NA	NA	NA
CP126969.1	CP126969.1_QP027_10775	2181947	2288805	QP027_10775	2235011	2235325	WIM67561.1	104	NA	NA	NA	NA	NA
CP126969.1	CP126969.1_QP027_10775	2181947	2288805	QP027_10780	2235415	2236053	WIM67562.1	212	NA	NA	NA	NA	NA
CP126969.1	CP126969.1_QP027_10775	2181947	2288805	QP027_10785	2236053	2237315	WIM67563.1	420	NA	NA	NA	NA	NA
CP126969.1	CP126969.1_QP027_10775	2181947	2288805	QP027_10790	2237314	2237932	NA	206	NA	NA	NA	NA	NA
CP126969.1	CP126969.1_QP027_10775	2181947	2288805	QP027_10795	2238086	2238898	WIM67564.1	270	NA	NA	NA	NA	NA
CP126969.1	CP126969.1_QP027_10775	2181947	2288805	QP027_10800	2238961	2240091	WIM67565.1	376	NA	NA	NA	NA	NA
CP126969.1	CP126969.1_QP027_10775	2181947	2288805	QP027_10805	2240079	2240717	WIM67566.1	212	NA	NA	NA	NA	NA
CP126969.1	CP126969.1_QP027_10775	2181947	2288805	QP027_10810	2240880	2241359	WIM67567.1	159	NA	NA	NA	NA	NA
CP126969.1	CP126969.1_QP027_10775	2181947	2288805	QP027_10815	2241364	2242176	WIM67568.1	270	NA	NA	NA	NA	NA
CP126969.1	CP126969.1_QP027_10775	2181947	2288805	QP027_10820	2242284	2242544	WIM67569.1	86	NA	NA	NA	NA	NA
CP126969.1	CP126969.1_QP027_10775	2181947	2288805	QP027_10825	2242769	2243665	WIM67570.1	298	NA	NA	NA	NA	NA
CP126969.1	CP126969.1_QP027_10775	2181947	2288805	QP027_10830	2243758	2243904	WIM67571.1	48	NA	NA	NA	NA	NA
CP126969.1	CP126969.1_QP027_10775	2181947	2288805	QP027_10835	2243840	2244931	WIM67572.1	363	NA	NA	NA	NA	NA
CP126969.1	CP126969.1_QP027_10775	2181947	2288805	QP027_10855	2251204	2252259	WIM67573.1	351	NA	NA	NA	NA	NA
CP126969.1	CP126969.1_QP027_10775	2181947	2288805	QP027_10860	2252261	2253094	WIM67574.1	277	NA	NA	NA	NA	NA
CP126969.1	CP126969.1_QP027_10775	2181947	2288805	QP027_10865	2253091	2253465	WIM67575.1	124	NA	NA	NA	NA	NA
CP126969.1	CP126969.1_QP027_10775	2181947	2288805	QP027_10870	2253659	2254954	WIM67576.1	431	NA	NA	NA	NA	NA
CP126969.1	CP126969.1_QP027_10775	2181947	2288805	QP027_10875	2255008	2255850	WIM67577.1	280	NA	NA	NA	NA	NA
CP126969.1	CP126969.1_QP027_10775	2181947	2288805	QP027_10880	2256022	2256390	WIM67578.1	122	NA	NA	NA	NA	NA
CP126969.1	CP126969.1_QP027_10775	2181947	2288805	QP027_10885	2256517	2256720	WIM67579.1	67	NA	NA	NA	NA	NA
CP126969.1	CP126969.1_QP027_10775	2181947	2288805	QP027_10890	2256787	2256987	WIM67580.1	66	NA	NA	NA	NA	NA
CP126969.1	CP126969.1_QP027_10775	2181947	2288805	QP027_10895	2257123	2259330	WIM69076.1	735	NA	NA	NA	NA	NA
CP126969.1	CP126969.1_QP027_10775	2181947	2288805	QP027_10900	2259399	2260724	WIM67581.1	441	NA	NA	NA	NA	NA
CP126969.1	CP126969.1_QP027_10775	2181947	2288805	QP027_10905	2260784	2260975	WIM67582.1	63	NA	NA	NA	NA	NA
CP126969.1	CP126969.1_QP027_10775	2181947	2288805	QP027_10910	2261149	2262612	WIM67583.1	487	NA	NA	NA	NA	NA
CP126969.1	CP126969.1_QP027_10775	2181947	2288805	QP027_10915	2263046	2263750	WIM67584.1	234	NA	NA	NA	NA	NA
CP126969.1	CP126969.1_QP027_10775	2181947	2288805	QP027_10920	2263747	2264475	WIM67585.1	242	NA	NA	NA	NA	NA
CP126969.1	CP126969.1_QP027_10775	2181947	2288805	QP027_10925	2264644	2265096	WIM67586.1	150	NA	NA	NA	NA	NA
CP126969.1	CP126969.1_QP027_10775	2181947	2288805	QP027_10930	2265144	2265770	WIM67587.1	208	NA	vcrx091	NA	NA	NA
CP126969.1	CP126969.1_QP027_10775	2181947	2288805	QP027_10935	2265856	2266152	WIM67588.1	98	NA	NA	NA	NA	NA
CP126969.1	CP126969.1_QP027_10775	2181947	2288805	QP027_10940	2266338	2266847	WIM67589.1	169	NA	NA	NA	NA	NA
CP126969.1	CP126969.1_QP027_10775	2181947	2288805	QP027_10945	2267069	2268535	WIM69077.1	488	NA	NA	NA	NA	NA
CP126969.1	CP126969.1_QP027_10775	2181947	2288805	QP027_10950	2268601	2270727	WIM69078.1	708	NA	NA	NA	NA	NA
CP126969.1	CP126969.1_QP027_10775	2181947	2288805	QP027_10955	2270965	2271357	WIM67590.1	130	NA	NA	NA	CC	NA
CP126969.1	CP126969.1_QP027_10775	2181947	2288805	QP027_10960	2271476	2272567	WIM67591.1	363	NA	NA	NA	NA	NA
CP126969.1	CP126969.1_QP027_10775	2181947	2288805	QP027_10965	2272603	2273076	WIM67592.1	157	NA	Lamassu-Fam__LmuC_acc_Mrr	NA	NA	NA
CP126969.1	CP126969.1_QP027_10775	2181947	2288805	QP027_10970	2273126	2274115	WIM67593.1	329	NA	NA	NA	NA	NA
CP126969.1	CP126969.1_QP027_10775	2181947	2288805	QP027_10975	2274125	2274595	WIM67594.1	156	NA	NA	NA	NA	NA
CP126969.1	CP126969.1_QP027_10775	2181947	2288805	QP027_10980	2274592	2275497	WIM67595.1	301	NA	NA	NA	NA	NA
CP126969.1	CP126969.1_QP027_10775	2181947	2288805	QP027_10985	2275549	2276424	WIM69079.1	291	NA	NA	NA	NA	NA
CP126969.1	CP126969.1_QP027_10775	2181947	2288805	QP027_10990	2276556	2276885	WIM67596.1	109	NA	NA	NA	NA	NA
CP126969.1	CP126969.1_QP027_10775	2181947	2288805	QP027_10995	2276897	2278390	WIM67597.1	497	NA	NA	NA	NA	NA
CP126969.1	CP126969.1_QP027_10775	2181947	2288805	QP027_11000	2278471	2280678	WIM67598.1	735	NA	NA	NA	NA	NA
CP126969.1	CP126969.1_QP027_10775	2181947	2288805	QP027_11005	2281113	2282405	WIM67599.1	430	NA	NA	NA	NA	NA
CP126969.1	CP126969.1_QP027_10775	2181947	2288805	QP027_11010	2282524	2283003	WIM67600.1	159	NA	NA	NA	NA	NA
CP126969.1	CP126969.1_QP027_10775	2181947	2288805	QP027_11015	2283027	2283839	WIM69080.1	270	NA	NA	NA	NA	NA
CP126969.1	CP126969.1_QP027_10775	2181947	2288805	QP027_11020	2283850	2285439	WIM67601.1	529	NA	NA	NA	NA	NA
CP126969.1	CP126969.1_QP027_10775	2181947	2288805	QP027_11025	2285424	2286155	WIM67602.1	243	NA	NA	NA	NA	NA
CP126969.1	CP126969.1_QP027_10775	2181947	2288805	QP027_11030	2286242	2287249	WIM67603.1	335	NA	NA	NA	NA	NA
CP126969.1	CP126969.1_QP027_10775	2181947	2288805	QP027_11035	2287229	2287531	WIM67604.1	100	NA	NA	NA	NA	NA
CP126969.1	CP126969.1_QP027_10775	2181947	2288805	QP027_11040	2287685	2288805	NA	373	NA	NA	NA	NA	NA
CP126970.1	CP126970.1_QP029_03410	639006	752909	QP029_03160	639006	639830	WIM70838.1	274	NA	NA	NA	NA	NA
CP126970.1	CP126970.1_QP029_03410	639006	752909	QP029_03165	639830	641308	WIM70839.1	492	NA	NA	NA	NA	NA
CP126970.1	CP126970.1_QP029_03410	639006	752909	QP029_03170	641308	643551	WIM70840.1	747	NA	NA	NA	NA	NA
CP126970.1	CP126970.1_QP029_03410	639006	752909	QP029_03175	643678	645252	WIM70841.1	524	NA	NA	NA	NA	NA
CP126970.1	CP126970.1_QP029_03410	639006	752909	QP029_03180	645294	650171	WIM70842.1	1625	NA	NA	NA	NA	NA
CP126970.1	CP126970.1_QP029_03410	639006	752909	QP029_03185	650330	652180	WIM70843.1	616	NA	NA	NA	NA	NA
CP126970.1	CP126970.1_QP029_03410	639006	752909	QP029_03190	652353	653264	WIM70844.1	303	NA	NA	NA	NA	NA
CP126970.1	CP126970.1_QP029_03410	639006	752909	QP029_03195	653269	653814	WIM70845.1	181	NA	NA	NA	NA	NA
CP126970.1	CP126970.1_QP029_03410	639006	752909	QP029_03200	653817	655754	WIM70846.1	645	NA	NA	NA	NA	NA
CP126970.1	CP126970.1_QP029_03410	639006	752909	QP029_03205	656146	657174	WIM70847.1	342	NA	NA	NA	NA	NA
CP126970.1	CP126970.1_QP029_03410	639006	752909	QP029_03210	657381	659354	WIM70848.1	657	NA	NA	NA	NA	NA
CP126970.1	CP126970.1_QP029_03410	639006	752909	QP029_03215	659417	660412	WIM71571.1	331	NA	NA	NA	NA	NA
CP126970.1	CP126970.1_QP029_03410	639006	752909	QP029_03220	660457	660960	WIM70849.1	167	NA	NA	NA	NA	NA
CP126970.1	CP126970.1_QP029_03410	639006	752909	QP029_03225	660957	662897	WIM71572.1	646	NA	NA	NA	NA	NA
CP126970.1	CP126970.1_QP029_03410	639006	752909	QP029_03230	663029	663922	WIM70850.1	297	NA	NA	NA	NA	NA
CP126970.1	CP126970.1_QP029_03410	639006	752909	QP029_03235	663847	664500	WIM70851.1	217	NA	NA	NA	NA	NA
CP126970.1	CP126970.1_QP029_03410	639006	752909	QP029_03240	664516	665154	WIM70852.1	212	NA	NA	NA	NA	NA
CP126970.1	CP126970.1_QP029_03410	639006	752909	QP029_03245	665389	665799	WIM70853.1	136	NA	NA	NA	NA	NA
CP126970.1	CP126970.1_QP029_03410	639006	752909	QP029_03250	665796	666341	WIM70854.1	181	NA	NA	NA	NA	NA
CP126970.1	CP126970.1_QP029_03410	639006	752909	QP029_03255	666357	666998	WIM70855.1	213	NA	Jallet_2C_hits_grouped	NA	NA	NA
CP126970.1	CP126970.1_QP029_03410	639006	752909	QP029_03260	667342	667626	WIM70856.1	94	NA	NA	NA	NA	NA
CP126970.1	CP126970.1_QP029_03410	639006	752909	QP029_03265	667866	669065	WIM70857.1	399	NA	NA	NA	NA	NA
CP126970.1	CP126970.1_QP029_03410	639006	752909	QP029_03270	669259	671355	WIM70858.1	698	NA	NA	NA	NA	NA
CP126970.1	CP126970.1_QP029_03410	639006	752909	QP029_03275	671352	672905	WIM70859.1	517	NA	NA	NA	NA	NA
CP126970.1	CP126970.1_QP029_03410	639006	752909	QP029_03280	673047	673871	WIM70860.1	274	NA	NA	NA	NA	NA
CP126970.1	CP126970.1_QP029_03410	639006	752909	QP029_03285	673879	674820	WIM70861.1	313	NA	NA	NA	NA	NA
CP126970.1	CP126970.1_QP029_03410	639006	752909	QP029_03290	674833	676104	WIM70862.1	423	NA	NA	NA	NA	NA
CP126970.1	CP126970.1_QP029_03410	639006	752909	QP029_03295	676301	677074	WIM70863.1	257	NA	NA	NA	NA	NA
CP126970.1	CP126970.1_QP029_03410	639006	752909	QP029_03300	677140	678210	WIM70864.1	356	NA	NA	NA	NA	NA
CP126970.1	CP126970.1_QP029_03410	639006	752909	QP029_03305	678221	678568	WIM70865.1	115	NA	NA	NA	NA	NA
CP126970.1	CP126970.1_QP029_03410	639006	752909	QP029_03310	678576	679268	WIM70866.1	230	NA	NA	NA	NA	NA
CP126970.1	CP126970.1_QP029_03410	639006	752909	QP029_03315	679269	680219	WIM70867.1	316	NA	NA	NA	NA	NA
CP126970.1	CP126970.1_QP029_03410	639006	752909	QP029_03320	680254	681498	WIM70868.1	414	NA	NA	NA	NA	NA
CP126970.1	CP126970.1_QP029_03410	639006	752909	QP029_03325	681495	682238	WIM70869.1	247	NA	NA	NA	NA	NA
CP126970.1	CP126970.1_QP029_03410	639006	752909	QP029_03330	682573	683640	WIM70870.1	355	NA	NA	NA	NA	NA
CP126970.1	CP126970.1_QP029_03410	639006	752909	QP029_03335	683705	684619	WIM70871.1	304	NA	NA	NA	NA	NA
CP126970.1	CP126970.1_QP029_03410	639006	752909	QP029_03340	684638	685357	WIM70872.1	239	NA	NA	NA	NA	NA
CP126970.1	CP126970.1_QP029_03410	639006	752909	QP029_03345	685354	687246	WIM70873.1	630	NA	NA	NA	NA	NA
CP126970.1	CP126970.1_QP029_03410	639006	752909	QP029_03350	687344	688297	WIM70874.1	317	NA	NA	NA	NA	NA
CP126970.1	CP126970.1_QP029_03410	639006	752909	QP029_03355	688512	689161	NA	217	NA	NA	NA	NA	NA
CP126970.1	CP126970.1_QP029_03410	639006	752909	QP029_03360	689330	690229	WIM71573.1	299	NA	NA	NA	NA	NA
CP126970.1	CP126970.1_QP029_03410	639006	752909	QP029_03365	690219	691943	WIM70875.1	574	NA	NA	NA	NA	NA
CP126970.1	CP126970.1_QP029_03410	639006	752909	QP029_03370	692059	692748	WIM70876.1	229	NA	gcu167__gcu167B	NA	NA	NA
CP126970.1	CP126970.1_QP029_03410	639006	752909	QP029_03375	692753	693424	WIM70877.1	223	NA	NA	NA	NA	NA
CP126970.1	CP126970.1_QP029_03410	639006	752909	QP029_03380	693434	694711	WIM70878.1	425	NA	NA	NA	NA	NA
CP126970.1	CP126970.1_QP029_03410	639006	752909	QP029_03385	694950	695553	NA	201	NA	NA	NA	NA	NA
CP126970.1	CP126970.1_QP029_03410	639006	752909	QP029_03390	695725	696618	WIM70879.1	297	NA	NA	NA	NA	NA
CP126970.1	CP126970.1_QP029_03410	639006	752909	QP029_03395	696690	697901	WIM70880.1	403	NA	NA	NA	NA	NA
CP126970.1	CP126970.1_QP029_03410	639006	752909	QP029_03400	697898	699436	WIM70881.1	512	NA	NA	NA	NA	NA
CP126970.1	CP126970.1_QP029_03410	639006	752909	QP029_03405	699528	700163	WIM70882.1	211	NA	NA	NA	NA	NA
CP126970.1	CP126970.1_QP029_03410	639006	752909	QP029_03410	700336	700680	WIM70883.1	114	NA	NA	NA	NA	NA
CP126970.1	CP126970.1_QP029_03410	639006	752909	QP029_03415	700684	701322	WIM70884.1	212	NA	NA	NA	NA	NA
CP126970.1	CP126970.1_QP029_03410	639006	752909	QP029_03420	701319	702647	WIM70885.1	442	NA	NA	NA	NA	NA
CP126970.1	CP126970.1_QP029_03410	639006	752909	QP029_03425	702646	703287	WIM70886.1	213	NA	NA	NA	NA	NA
CP126970.1	CP126970.1_QP029_03410	639006	752909	QP029_03430	703294	703446	WIM70887.1	50	NA	NA	NA	NA	NA
CP126970.1	CP126970.1_QP029_03410	639006	752909	QP029_03435	703447	704259	WIM70888.1	270	NA	NA	NA	NA	NA
CP126970.1	CP126970.1_QP029_03410	639006	752909	QP029_03440	704366	705571	WIM70889.1	401	NA	NA	NA	NA	NA
CP126970.1	CP126970.1_QP029_03410	639006	752909	QP029_03445	705498	706130	WIM70890.1	210	NA	NA	NA	NA	NA
CP126970.1	CP126970.1_QP029_03410	639006	752909	QP029_03450	706322	706579	WIM70891.1	85	NA	NA	NA	NA	NA
CP126970.1	CP126970.1_QP029_03410	639006	752909	QP029_03455	706870	707766	WIM70892.1	298	NA	NA	NA	NA	NA
CP126970.1	CP126970.1_QP029_03410	639006	752909	QP029_03460	707893	708039	WIM70893.1	48	NA	NA	NA	NA	NA
CP126970.1	CP126970.1_QP029_03410	639006	752909	QP029_03465	708032	709035	NA	334	NA	NA	NA	NA	NA
CP126970.1	CP126970.1_QP029_03410	639006	752909	QP029_03485	715032	715796	WIM70894.1	254	NA	NA	NA	NA	NA
CP126970.1	CP126970.1_QP029_03410	639006	752909	QP029_03490	715843	716871	WIM70895.1	342	NA	NA	NA	NA	NA
CP126970.1	CP126970.1_QP029_03410	639006	752909	QP029_03495	716868	717242	WIM70896.1	124	NA	NA	NA	NA	NA
CP126970.1	CP126970.1_QP029_03410	639006	752909	QP029_03500	717456	718829	WIM70897.1	457	NA	NA	NA	NA	NA
CP126970.1	CP126970.1_QP029_03410	639006	752909	QP029_03505	718811	719749	WIM70898.1	312	NA	NA	NA	NA	NA
CP126970.1	CP126970.1_QP029_03410	639006	752909	QP029_03510	719974	720363	WIM70899.1	129	NA	NA	NA	NA	NA
CP126970.1	CP126970.1_QP029_03410	639006	752909	QP029_03515	720499	720720	WIM70900.1	73	NA	NA	NA	NA	NA
CP126970.1	CP126970.1_QP029_03410	639006	752909	QP029_03520	720797	721006	WIM70901.1	69	NA	NA	NA	NA	NA
CP126970.1	CP126970.1_QP029_03410	639006	752909	QP029_03525	721117	723402	WIM70902.1	761	NA	NA	NA	NA	NA
CP126970.1	CP126970.1_QP029_03410	639006	752909	QP029_03530	723466	724821	WIM70903.1	451	NA	NA	NA	NA	NA
CP126970.1	CP126970.1_QP029_03410	639006	752909	QP029_03535	724829	724999	WIM70904.1	56	NA	NA	NA	NA	NA
CP126970.1	CP126970.1_QP029_03410	639006	752909	QP029_03540	725378	726541	WIM70905.1	387	NA	NA	NA	NA	NA
CP126970.1	CP126970.1_QP029_03410	639006	752909	QP029_03545	726538	728021	NA	494	NA	NA	NA	NA	NA
CP126970.1	CP126970.1_QP029_03410	639006	752909	QP029_03550	728645	729097	WIM70906.1	150	NA	NA	NA	NA	NA
CP126970.1	CP126970.1_QP029_03410	639006	752909	QP029_03555	729186	729791	WIM70907.1	201	NA	vcrx091	NA	NA	NA
CP126970.1	CP126970.1_QP029_03410	639006	752909	QP029_03560	729886	730173	WIM70908.1	95	NA	NA	NA	NA	NA
CP126970.1	CP126970.1_QP029_03410	639006	752909	QP029_03565	730310	730639	WIM70909.1	109	NA	NA	NA	NA	NA
CP126970.1	CP126970.1_QP029_03410	639006	752909	QP029_03570	730657	730845	WIM70910.1	62	NA	NA	NA	NA	NA
CP126970.1	CP126970.1_QP029_03410	639006	752909	QP029_03575	730842	732305	WIM70911.1	487	NA	NA	NA	NA	NA
CP126970.1	CP126970.1_QP029_03410	639006	752909	QP029_03580	732320	734419	WIM70912.1	699	NA	NA	NA	NA	NA
CP126970.1	CP126970.1_QP029_03410	639006	752909	QP029_03585	734639	735001	WIM70913.1	120	NA	NA	NA	CC	NA
CP126970.1	CP126970.1_QP029_03410	639006	752909	QP029_03590	735172	736263	WIM70914.1	363	NA	NA	NA	NA	NA
CP126970.1	CP126970.1_QP029_03410	639006	752909	QP029_03595	736329	736790	WIM70915.1	153	NA	Lamassu-Fam__LmuC_acc_Mrr	NA	NA	NA
CP126970.1	CP126970.1_QP029_03410	639006	752909	QP029_03600	736840	737793	WIM70916.1	317	NA	NA	NA	NA	NA
CP126970.1	CP126970.1_QP029_03410	639006	752909	QP029_03605	737828	738376	WIM70917.1	182	NA	NA	NA	NA	NA
CP126970.1	CP126970.1_QP029_03410	639006	752909	QP029_03610	738373	739287	WIM70918.1	304	NA	NA	NA	NA	NA
CP126970.1	CP126970.1_QP029_03410	639006	752909	QP029_03615	739298	741058	WIM70919.1	586	NA	NA	NA	NA	NA
CP126970.1	CP126970.1_QP029_03410	639006	752909	QP029_03620	741131	742624	WIM70920.1	497	NA	NA	NA	NA	NA
CP126970.1	CP126970.1_QP029_03410	639006	752909	QP029_03625	742726	743538	WIM70921.1	270	NA	NA	NA	NA	NA
CP126970.1	CP126970.1_QP029_03410	639006	752909	QP029_03630	743477	744196	WIM70922.1	239	NA	NA	NA	NA	NA
CP126970.1	CP126970.1_QP029_03410	639006	752909	QP029_03635	744239	745960	WIM70923.1	573	NA	NA	NA	NA	NA
CP126970.1	CP126970.1_QP029_03410	639006	752909	QP029_03640	746245	747210	WIM70924.1	321	NA	NA	NA	NA	NA
CP126970.1	CP126970.1_QP029_03410	639006	752909	QP029_03645	747354	748076	WIM70925.1	240	NA	Michele_1A_hits_grouped	NA	NA	NA
CP126970.1	CP126970.1_QP029_03410	639006	752909	QP029_03650	748073	748744	WIM70926.1	223	NA	NA	NA	NA	NA
CP126970.1	CP126970.1_QP029_03410	639006	752909	QP029_03655	748744	749751	WIM70927.1	335	NA	NA	NA	NA	NA
CP126970.1	CP126970.1_QP029_03410	639006	752909	QP029_03660	749887	751086	WIM70928.1	399	NA	NA	NA	NA	NA
CP126970.1	CP126970.1_QP029_03410	639006	752909	QP029_03665	751083	751613	WIM70929.1	176	NA	NA	NA	NA	NA
CP126970.1	CP126970.1_QP029_03410	639006	752909	QP029_03670	751624	752574	WIM70930.1	316	NA	NA	NA	NA	NA
CP126970.1	CP126970.1_QP029_03410	639006	752909	QP029_03675	752571	752909	WIM70931.1	112	NA	NA	NA	CP	Quercetinase C-terminal cupin domain
DWUR01000158.1	DWUR01000158.1_H9907_09105	1	8737	H9907_09065	1	796	HJD50217.1	264	NA	NA	NA	NA	NA
DWUR01000158.1	DWUR01000158.1_H9907_09105	1	8737	H9907_09070	907	1824	HJD50218.1	305	NA	NA	NA	NA	NA
DWUR01000158.1	DWUR01000158.1_H9907_09105	1	8737	H9907_09075	1874	2635	HJD50219.1	253	NA	NA	NA	NA	NA
DWUR01000158.1	DWUR01000158.1_H9907_09105	1	8737	H9907_09080	2792	3691	HJD50220.1	299	NA	NA	NA	NA	NA
DWUR01000158.1	DWUR01000158.1_H9907_09105	1	8737	H9907_09085	3867	4469	HJD50221.1	200	NA	NA	NA	NA	NA
DWUR01000158.1	DWUR01000158.1_H9907_09105	1	8737	H9907_09090	4636	5331	HJD50222.1	231	NA	NA	NA	NA	NA
DWUR01000158.1	DWUR01000158.1_H9907_09105	1	8737	H9907_09095	5372	7003	HJD50223.1	543	NA	NA	NA	NA	NA
DWUR01000158.1	DWUR01000158.1_H9907_09105	1	8737	H9907_09100	7207	7830	HJD50224.1	207	NA	NA	NA	NA	NA
DWUR01000158.1	DWUR01000158.1_H9907_09105	1	8737	H9907_09105	7963	8301	HJD50225.1	112	NA	NA	NA	NA	NA
DWUR01000158.1	DWUR01000158.1_H9907_09105	1	8737	H9907_09110	8346	8737	HJD50226.1	131	NA	NA	NA	NA	NA
DWVP01000009.1	DWVP01000009.1_H9751_04065	477	61011	H9751_04035	477	1583	HJC84711.1	368	NA	NA	NA	NA	NA
DWVP01000009.1	DWVP01000009.1_H9751_04065	477	61011	H9751_04040	1598	2662	HJC84712.1	354	NA	NA	NA	NA	NA
DWVP01000009.1	DWVP01000009.1_H9751_04065	477	61011	H9751_04045	3007	3915	HJC84713.1	302	NA	NA	NA	NA	NA
DWVP01000009.1	DWVP01000009.1_H9751_04065	477	61011	H9751_04050	4163	4795	HJC84714.1	210	NA	NA	NA	NA	NA
DWVP01000009.1	DWVP01000009.1_H9751_04065	477	61011	H9751_04055	4829	6298	HJC84715.1	489	NA	NA	NA	NA	NA
DWVP01000009.1	DWVP01000009.1_H9751_04065	477	61011	H9751_04060	7586	8304	NA	239	NA	NA	NA	NA	NA
DWVP01000009.1	DWVP01000009.1_H9751_04065	477	61011	H9751_04065	8305	8667	HJC84716.1	120	NA	NA	NA	NA	NA
DWVP01000009.1	DWVP01000009.1_H9751_04065	477	61011	H9751_04070	8806	9405	HJC84717.1	199	NA	NA	NA	NA	NA
DWVP01000009.1	DWVP01000009.1_H9751_04065	477	61011	H9751_04075	9504	11195	HJC84718.1	563	NA	NA	NA	NA	NA
DWVP01000009.1	DWVP01000009.1_H9751_04065	477	61011	H9751_04080	11192	11896	HJC84719.1	234	NA	NA	NA	NA	NA
DWVP01000009.1	DWVP01000009.1_H9751_04065	477	61011	H9751_04085	11954	12475	HJC84720.1	173	NA	NA	NA	NA	NA
DWVP01000009.1	DWVP01000009.1_H9751_04065	477	61011	H9751_04090	12748	13350	HJC84721.1	200	NA	NA	NA	NA	NA
DWVP01000009.1	DWVP01000009.1_H9751_04065	477	61011	H9751_04095	13616	14581	HJC84722.1	321	NA	NA	NA	NA	NA
DWVP01000009.1	DWVP01000009.1_H9751_04065	477	61011	H9751_04100	14597	15589	HJC84723.1	330	NA	NA	NA	NA	NA
DWVP01000009.1	DWVP01000009.1_H9751_04065	477	61011	H9751_04105	15630	16394	HJC84724.1	254	NA	NA	NA	NA	NA
DWVP01000009.1	DWVP01000009.1_H9751_04065	477	61011	H9751_04110	16454	17410	HJC84725.1	318	NA	NA	NA	NA	NA
DWVP01000009.1	DWVP01000009.1_H9751_04065	477	61011	H9751_04115	17448	17945	HJC84726.1	165	NA	NA	NA	NA	NA
DWVP01000009.1	DWVP01000009.1_H9751_04065	477	61011	H9751_04120	17942	18664	HJC84727.1	240	NA	NA	NA	NA	NA
DWVP01000009.1	DWVP01000009.1_H9751_04065	477	61011	H9751_04125	18664	19746	HJC84728.1	360	NA	NA	NA	NA	NA
DWVP01000009.1	DWVP01000009.1_H9751_04065	477	61011	H9751_04130	19816	21153	HJC84729.1	445	NA	CBASS__2TM_new	NA	NA	NA
DWVP01000009.1	DWVP01000009.1_H9751_04065	477	61011	H9751_04135	21150	21797	HJC84730.1	215	NA	NA	NA	NA	NA
DWVP01000009.1	DWVP01000009.1_H9751_04065	477	61011	H9751_04140	21815	23116	HJC84731.1	433	NA	NA	NA	NA	NA
DWVP01000009.1	DWVP01000009.1_H9751_04065	477	61011	H9751_04145	23228	23653	HJC84732.1	141	NA	NA	NA	NA	NA
DWVP01000009.1	DWVP01000009.1_H9751_04065	477	61011	H9751_04150	23738	24016	HJC84733.1	92	NA	NA	NA	NA	NA
DWVP01000009.1	DWVP01000009.1_H9751_04065	477	61011	H9751_04155	24261	24491	HJC84734.1	76	NA	NA	NA	NA	NA
DWVP01000009.1	DWVP01000009.1_H9751_04065	477	61011	H9751_04160	24540	24872	HJC84735.1	110	NA	NA	NA	NA	NA
DWVP01000009.1	DWVP01000009.1_H9751_04065	477	61011	H9751_04165	24984	25874	HJC84736.1	296	NA	NA	NA	NA	NA
DWVP01000009.1	DWVP01000009.1_H9751_04065	477	61011	H9751_04170	26384	28054	HJC84737.1	556	NA	NA	NA	NA	NA
DWVP01000009.1	DWVP01000009.1_H9751_04065	477	61011	H9751_04175	28026	28427	HJC84738.1	133	NA	NA	NA	NA	NA
DWVP01000009.1	DWVP01000009.1_H9751_04065	477	61011	H9751_04180	28674	29513	HJC84739.1	279	NA	NA	NA	NA	NA
DWVP01000009.1	DWVP01000009.1_H9751_04065	477	61011	H9751_04185	29751	31133	HJC84740.1	460	NA	NA	NA	NA	NA
DWVP01000009.1	DWVP01000009.1_H9751_04065	477	61011	H9751_04190	31171	32175	HJC84741.1	334	NA	NA	NA	NA	NA
DWVP01000009.1	DWVP01000009.1_H9751_04065	477	61011	H9751_04195	32103	33095	HJC84742.1	330	NA	NA	NA	NA	NA
DWVP01000009.1	DWVP01000009.1_H9751_04065	477	61011	H9751_04200	33160	33507	HJC84743.1	115	NA	NA	NA	NA	NA
DWVP01000009.1	DWVP01000009.1_H9751_04065	477	61011	H9751_04205	33535	34659	HJC84744.1	374	NA	NA	NA	NA	NA
DWVP01000009.1	DWVP01000009.1_H9751_04065	477	61011	H9751_04210	34743	36017	HJC84745.1	424	NA	NA	NA	NA	NA
DWVP01000009.1	DWVP01000009.1_H9751_04065	477	61011	H9751_04215	36040	36978	HJC84746.1	312	NA	NA	NA	NA	NA
DWVP01000009.1	DWVP01000009.1_H9751_04065	477	61011	H9751_04220	36954	37877	HJC84747.1	307	NA	NA	NA	NA	NA
DWVP01000009.1	DWVP01000009.1_H9751_04065	477	61011	H9751_04225	38422	38574	HJC84748.1	50	NA	NA	NA	NA	NA
DWVP01000009.1	DWVP01000009.1_H9751_04065	477	61011	H9751_04230	38750	39754	HJC84749.1	334	NA	NA	NA	NA	NA
DWVP01000009.1	DWVP01000009.1_H9751_04065	477	61011	H9751_04235	39867	40400	HJC84750.1	177	NA	NA	NA	NA	NA
DWVP01000009.1	DWVP01000009.1_H9751_04065	477	61011	H9751_04240	40494	41663	HJC84751.1	389	NA	NA	NA	NA	NA
DWVP01000009.1	DWVP01000009.1_H9751_04065	477	61011	H9751_04245	41823	42254	HJC84752.1	143	NA	NA	NA	NA	NA
DWVP01000009.1	DWVP01000009.1_H9751_04065	477	61011	H9751_04250	42360	44159	HJC84753.1	599	NA	NA	NA	NA	NA
DWVP01000009.1	DWVP01000009.1_H9751_04065	477	61011	H9751_04255	44205	46187	HJC84754.1	660	NA	NA	NA	NA	NA
DWVP01000009.1	DWVP01000009.1_H9751_04065	477	61011	H9751_04260	46224	46469	HJC84755.1	81	NA	NA	NA	NA	NA
DWVP01000009.1	DWVP01000009.1_H9751_04065	477	61011	H9751_04265	46660	47349	HJC84756.1	229	NA	NA	NA	NA	NA
DWVP01000009.1	DWVP01000009.1_H9751_04065	477	61011	H9751_04270	47668	49671	HJC84757.1	667	NA	NA	NA	NA	NA
DWVP01000009.1	DWVP01000009.1_H9751_04065	477	61011	H9751_04275	49664	50239	HJC84758.1	191	NA	NA	NA	NA	NA
DWVP01000009.1	DWVP01000009.1_H9751_04065	477	61011	H9751_04280	50236	51330	HJC84759.1	364	NA	NA	NA	NA	NA
DWVP01000009.1	DWVP01000009.1_H9751_04065	477	61011	H9751_04285	51577	52632	HJC84760.1	351	NA	NA	NA	NA	NA
DWVP01000009.1	DWVP01000009.1_H9751_04065	477	61011	H9751_04290	53009	53761	HJC84761.1	250	NA	NA	NA	NA	NA
DWVP01000009.1	DWVP01000009.1_H9751_04065	477	61011	H9751_04295	54074	56032	HJC84762.1	652	NA	NA	NA	NA	NA
DWVP01000009.1	DWVP01000009.1_H9751_04065	477	61011	H9751_04300	56032	56559	HJC84763.1	175	NA	NA	NA	NA	NA
DWVP01000009.1	DWVP01000009.1_H9751_04065	477	61011	H9751_04305	56683	57397	NA	238	NA	NA	NA	NA	NA
DWVP01000009.1	DWVP01000009.1_H9751_04065	477	61011	H9751_04310	57518	59965	HJC84764.1	815	NA	NA	NA	NA	NA
DWVP01000009.1	DWVP01000009.1_H9751_04065	477	61011	H9751_04315	60079	61011	HJC84765.1	310	NA	NA	NA	NA	NA
DXFZ01000085.1	DXFZ01000085.1_H9867_06820	131	10637	H9867_06810	131	766	HIW96175.1	211	NA	NA	NA	NA	NA
DXFZ01000085.1	DXFZ01000085.1_H9867_06820	131	10637	H9867_06815	810	2582	HIW96176.1	590	NA	NA	NA	NA	NA
DXFZ01000085.1	DXFZ01000085.1_H9867_06820	131	10637	H9867_06820	2870	3214	HIW96177.1	114	NA	NA	NA	NA	NA
DXFZ01000085.1	DXFZ01000085.1_H9867_06820	131	10637	H9867_06825	3330	3905	HIW96178.1	191	NA	NA	NA	NA	NA
DXFZ01000085.1	DXFZ01000085.1_H9867_06820	131	10637	H9867_06830	3922	4077	HIW96179.1	51	NA	NA	NA	NA	NA
DXFZ01000085.1	DXFZ01000085.1_H9867_06820	131	10637	H9867_06835	4086	4862	HIW96180.1	258	NA	NA	NA	NA	NA
DXFZ01000085.1	DXFZ01000085.1_H9867_06820	131	10637	H9867_06840	4922	6097	HIW96181.1	391	NA	NA	NA	NA	NA
DXFZ01000085.1	DXFZ01000085.1_H9867_06820	131	10637	H9867_06845	6107	6766	HIW96182.1	219	NA	NA	NA	NA	NA
DXFZ01000085.1	DXFZ01000085.1_H9867_06820	131	10637	H9867_06850	6877	7776	HIW96183.1	299	NA	NA	NA	NA	NA
DXFZ01000085.1	DXFZ01000085.1_H9867_06820	131	10637	H9867_06855	7879	8043	HIW96184.1	54	NA	NA	NA	NA	NA
DXFZ01000085.1	DXFZ01000085.1_H9867_06820	131	10637	H9867_06860	8062	9081	HIW96185.1	339	NA	NA	NA	NA	NA
DXFZ01000085.1	DXFZ01000085.1_H9867_06820	131	10637	H9867_06865	9078	10637	HIW96186.1	519	NA	NA	NA	NA	NA
DXGC01000117.1	DXGC01000117.1_H9870_13445	202	48814	H9870_13410	202	1230	HIW92644.1	342	NA	NA	NA	NA	NA
DXGC01000117.1	DXGC01000117.1_H9870_13445	202	48814	H9870_13415	1251	2327	HIW92645.1	358	NA	NA	NA	NA	NA
DXGC01000117.1	DXGC01000117.1_H9870_13445	202	48814	H9870_13420	2601	3506	HIW92646.1	301	NA	NA	NA	NA	NA
DXGC01000117.1	DXGC01000117.1_H9870_13445	202	48814	H9870_13425	3740	4411	HIW92647.1	223	NA	NA	NA	NA	NA
DXGC01000117.1	DXGC01000117.1_H9870_13445	202	48814	H9870_13430	4434	5840	HIW92648.1	468	NA	NA	NA	NA	NA
DXGC01000117.1	DXGC01000117.1_H9870_13445	202	48814	H9870_13435	5839	7089	HIW92649.1	416	NA	NA	NA	NA	NA
DXGC01000117.1	DXGC01000117.1_H9870_13445	202	48814	H9870_13440	7122	7763	HIW92650.1	213	NA	Detocs__dtcB	NA	NA	NA
DXGC01000117.1	DXGC01000117.1_H9870_13445	202	48814	H9870_13445	7818	8180	HIW92651.1	120	NA	NA	NA	NA	NA
DXGC01000117.1	DXGC01000117.1_H9870_13445	202	48814	H9870_13450	8371	8973	HIW92652.1	200	NA	NA	NA	NA	NA
DXGC01000117.1	DXGC01000117.1_H9870_13445	202	48814	H9870_13455	9083	10765	HIW92653.1	560	NA	NA	NA	NA	NA
DXGC01000117.1	DXGC01000117.1_H9870_13445	202	48814	H9870_13460	10762	11466	HIW92654.1	234	NA	NA	NA	NA	NA
DXGC01000117.1	DXGC01000117.1_H9870_13445	202	48814	H9870_13465	11487	12017	HIW92655.1	176	NA	NA	NA	NA	NA
DXGC01000117.1	DXGC01000117.1_H9870_13445	202	48814	H9870_13470	12351	12953	HIW92656.1	200	NA	NA	NA	NA	NA
DXGC01000117.1	DXGC01000117.1_H9870_13445	202	48814	H9870_13475	13311	14276	HIW92657.1	321	NA	NA	NA	NA	NA
DXGC01000117.1	DXGC01000117.1_H9870_13445	202	48814	H9870_13480	14302	15294	HIW92658.1	330	NA	NA	NA	NA	NA
DXGC01000117.1	DXGC01000117.1_H9870_13445	202	48814	H9870_13485	15344	16099	HIW92659.1	251	NA	NA	NA	NA	NA
DXGC01000117.1	DXGC01000117.1_H9870_13445	202	48814	H9870_13490	16160	17116	HIW92660.1	318	NA	NA	NA	NA	NA
DXGC01000117.1	DXGC01000117.1_H9870_13445	202	48814	H9870_13495	17137	17634	HIW92661.1	165	NA	NA	NA	NA	NA
DXGC01000117.1	DXGC01000117.1_H9870_13445	202	48814	H9870_13500	17631	18362	HIW92662.1	243	NA	NA	NA	NA	NA
DXGC01000117.1	DXGC01000117.1_H9870_13445	202	48814	H9870_13505	18362	19435	HIW92663.1	357	NA	NA	NA	NA	NA
DXGC01000117.1	DXGC01000117.1_H9870_13445	202	48814	H9870_13510	19413	20921	HIW92664.1	502	NA	NA	NA	NA	NA
DXGC01000117.1	DXGC01000117.1_H9870_13445	202	48814	H9870_13515	20966	21562	HIW92665.1	198	NA	NA	NA	NA	NA
DXGC01000117.1	DXGC01000117.1_H9870_13445	202	48814	H9870_13520	21592	22923	HIW92666.1	443	NA	NA	NA	NA	NA
DXGC01000117.1	DXGC01000117.1_H9870_13445	202	48814	H9870_13525	23055	23534	HIW92667.1	159	NA	NA	NA	NA	NA
DXGC01000117.1	DXGC01000117.1_H9870_13445	202	48814	H9870_13530	23882	24151	HIW92668.1	89	NA	NA	NA	NA	NA
DXGC01000117.1	DXGC01000117.1_H9870_13445	202	48814	H9870_13535	24303	24626	HIW92669.1	107	NA	NA	NA	NA	NA
DXGC01000117.1	DXGC01000117.1_H9870_13445	202	48814	H9870_13540	24673	24993	HIW92670.1	106	NA	NA	NA	NA	NA
DXGC01000117.1	DXGC01000117.1_H9870_13445	202	48814	H9870_13545	25083	25973	HIW92671.1	296	NA	NA	NA	NA	NA
DXGC01000117.1	DXGC01000117.1_H9870_13445	202	48814	H9870_13550	26490	28136	HIW92672.1	548	NA	NA	NA	NA	NA
DXGC01000117.1	DXGC01000117.1_H9870_13445	202	48814	H9870_13555	28218	29063	HIW92673.1	281	NA	NA	NA	NA	NA
DXGC01000117.1	DXGC01000117.1_H9870_13445	202	48814	H9870_13560	29280	30719	HIW92674.1	479	NA	NA	NA	NA	NA
DXGC01000117.1	DXGC01000117.1_H9870_13445	202	48814	H9870_13565	30757	31782	HIW92675.1	341	NA	NA	NA	NA	NA
DXGC01000117.1	DXGC01000117.1_H9870_13445	202	48814	H9870_13570	31786	32658	HIW92676.1	290	NA	NA	NA	NA	NA
DXGC01000117.1	DXGC01000117.1_H9870_13445	202	48814	H9870_13575	32698	33045	HIW92677.1	115	NA	NA	NA	NA	NA
DXGC01000117.1	DXGC01000117.1_H9870_13445	202	48814	H9870_13580	33049	34149	HIW92678.1	366	NA	NA	NA	NA	NA
DXGC01000117.1	DXGC01000117.1_H9870_13445	202	48814	H9870_13585	34233	35507	HIW92679.1	424	NA	NA	NA	NA	NA
DXGC01000117.1	DXGC01000117.1_H9870_13445	202	48814	H9870_13590	35521	36453	HIW92680.1	310	NA	NA	NA	NA	NA
DXGC01000117.1	DXGC01000117.1_H9870_13445	202	48814	H9870_13595	36429	37304	HIW92681.1	291	NA	NA	NA	NA	NA
DXGC01000117.1	DXGC01000117.1_H9870_13445	202	48814	H9870_13600	37339	38532	HIW92682.1	397	NA	NA	NA	NA	NA
DXGC01000117.1	DXGC01000117.1_H9870_13445	202	48814	H9870_13605	39090	39761	HIW92683.1	223	NA	NA	NA	NA	NA
DXGC01000117.1	DXGC01000117.1_H9870_13445	202	48814	H9870_13610	39934	41094	HIW92684.1	386	NA	NA	NA	NA	NA
DXGC01000117.1	DXGC01000117.1_H9870_13445	202	48814	H9870_13615	41091	42113	HIW92685.1	340	NA	NA	NA	NA	NA
DXGC01000117.1	DXGC01000117.1_H9870_13445	202	48814	H9870_13620	42148	42831	HIW92686.1	227	NA	NA	NA	NA	NA
DXGC01000117.1	DXGC01000117.1_H9870_13445	202	48814	H9870_13625	42846	43862	HIW92687.1	338	NA	NA	NA	NA	NA
DXGC01000117.1	DXGC01000117.1_H9870_13445	202	48814	H9870_13630	43945	44637	HIW92688.1	230	NA	NA	NA	NA	NA
DXGC01000117.1	DXGC01000117.1_H9870_13445	202	48814	H9870_13635	44692	45873	HIW92689.1	393	NA	NA	NA	NA	NA
DXGC01000117.1	DXGC01000117.1_H9870_13445	202	48814	H9870_13640	45866	46558	HIW92690.1	230	NA	NA	NA	NA	NA
DXGC01000117.1	DXGC01000117.1_H9870_13445	202	48814	H9870_13645	46615	47619	HIW92691.1	334	NA	NA	NA	NA	NA
DXGC01000117.1	DXGC01000117.1_H9870_13445	202	48814	H9870_13650	47732	48223	HIW92692.1	163	NA	NA	NA	NA	NA
DXGC01000117.1	DXGC01000117.1_H9870_13445	202	48814	H9870_13655	48291	48814	HIW92693.1	175	NA	NA	NA	NA	NA
JAAYSN010000027.1	JAAYSN010000027.1_GX356_01305	69	9711	GX356_01265	69	338	NLP38341.1	89	NA	NA	NA	NA	NA
JAAYSN010000027.1	JAAYSN010000027.1_GX356_01305	69	9711	GX356_01270	490	1122	NLP38342.1	210	NA	NA	NA	NA	NA
JAAYSN010000027.1	JAAYSN010000027.1_GX356_01305	69	9711	GX356_01275	1049	2302	NLP38343.1	417	NA	NA	NA	NA	NA
JAAYSN010000027.1	JAAYSN010000027.1_GX356_01305	69	9711	GX356_01280	2400	3227	NLP38344.1	275	NA	NA	NA	NA	NA
JAAYSN010000027.1	JAAYSN010000027.1_GX356_01305	69	9711	GX356_01285	3228	3380	NLP38345.1	50	NA	NA	NA	NA	NA
JAAYSN010000027.1	JAAYSN010000027.1_GX356_01305	69	9711	GX356_01290	3381	3965	NLP38346.1	194	NA	NA	NA	NA	NA
JAAYSN010000027.1	JAAYSN010000027.1_GX356_01305	69	9711	GX356_01295	3964	5247	NLP38347.1	427	NA	NA	NA	NA	NA
JAAYSN010000027.1	JAAYSN010000027.1_GX356_01305	69	9711	GX356_01300	5255	5893	NLP38348.1	212	NA	NA	NA	NA	NA
JAAYSN010000027.1	JAAYSN010000027.1_GX356_01305	69	9711	GX356_01305	5890	6243	NLP38349.1	117	NA	NA	NA	NA	NA
JAAYSN010000027.1	JAAYSN010000027.1_GX356_01305	69	9711	GX356_01310	6396	7031	NLP38350.1	211	NA	NA	NA	NA	NA
JAAYSN010000027.1	JAAYSN010000027.1_GX356_01305	69	9711	GX356_01315	7088	8620	NLP38351.1	510	NA	NA	NA	NA	NA
JAAYSN010000027.1	JAAYSN010000027.1_GX356_01305	69	9711	GX356_01320	8617	9711	NLP38352.1	364	NA	NA	NA	NA	NA
JAAYYP010000470.1	JAAYYP010000470.1_GX570_12740	1	8755	GX570_12735	1	496	NLF92188.1	165	NA	NA	NA	NA	NA
JAAYYP010000470.1	JAAYYP010000470.1_GX570_12740	1	8755	GX570_12740	676	1026	NLF92189.1	116	NA	NA	NA	NA	NA
JAAYYP010000470.1	JAAYYP010000470.1_GX570_12740	1	8755	GX570_12745	1220	1855	NLF92190.1	211	NA	NA	NA	NA	NA
JAAYYP010000470.1	JAAYYP010000470.1_GX570_12740	1	8755	GX570_12750	1934	3469	NLF92191.1	511	NA	NA	NA	NA	NA
JAAYYP010000470.1	JAAYYP010000470.1_GX570_12740	1	8755	GX570_12755	3471	4598	NLF92192.1	375	NA	NA	NA	NA	NA
JAAYYP010000470.1	JAAYYP010000470.1_GX570_12740	1	8755	GX570_12760	4738	5613	NLF92193.1	291	NA	NA	NA	NA	NA
JAAYYP010000470.1	JAAYYP010000470.1_GX570_12740	1	8755	GX570_12765	5682	6281	NLF92194.1	199	NA	NA	NA	NA	NA
JAAYYP010000470.1	JAAYYP010000470.1_GX570_12740	1	8755	GX570_12770	6447	7118	NLF92195.1	223	NA	NA	NA	NA	NA
JAAYYP010000470.1	JAAYYP010000470.1_GX570_12740	1	8755	GX570_12775	7115	7789	NLF92196.1	224	NA	gcu167__gcu167B	NA	NA	NA
JAAYYP010000470.1	JAAYYP010000470.1_GX570_12740	1	8755	GX570_12780	7890	8755	NLF92197.1	288	NA	NA	NA	NA	NA
JAAZHI010000111.1	JAAZHI010000111.1_GX859_05110	1	24310	GX859_05050	1	439	NLA55654.1	146	NA	NA	NA	NA	NA
JAAZHI010000111.1	JAAZHI010000111.1_GX859_05110	1	24310	GX859_05055	527	1480	NLA55655.1	317	NA	NA	NA	NA	NA
JAAZHI010000111.1	JAAZHI010000111.1_GX859_05110	1	24310	GX859_05060	1609	3420	NLA55656.1	603	NA	NA	NA	NA	NA
JAAZHI010000111.1	JAAZHI010000111.1_GX859_05110	1	24310	GX859_05065	3410	5119	NLA55657.1	569	NA	NA	NA	NA	NA
JAAZHI010000111.1	JAAZHI010000111.1_GX859_05110	1	24310	GX859_05070	5213	5878	NLA55658.1	221	NA	gcu167__gcu167B	NA	NA	NA
JAAZHI010000111.1	JAAZHI010000111.1_GX859_05110	1	24310	GX859_05075	5875	7995	NLA55659.1	706	NA	NA	NA	NA	NA
JAAZHI010000111.1	JAAZHI010000111.1_GX859_05110	1	24310	GX859_05080	8268	9593	NLA55660.1	441	NA	NA	NA	NA	NA
JAAZHI010000111.1	JAAZHI010000111.1_GX859_05110	1	24310	GX859_05085	10075	10674	NLA55661.1	199	NA	NA	NA	NA	NA
JAAZHI010000111.1	JAAZHI010000111.1_GX859_05110	1	24310	GX859_05090	10741	11634	NLA55662.1	297	NA	NA	NA	NA	NA
JAAZHI010000111.1	JAAZHI010000111.1_GX859_05110	1	24310	GX859_05095	11759	12895	NLA55663.1	378	NA	NA	NA	NA	NA
JAAZHI010000111.1	JAAZHI010000111.1_GX859_05110	1	24310	GX859_05100	12915	14516	NLA55664.1	533	NA	NA	NA	NA	NA
JAAZHI010000111.1	JAAZHI010000111.1_GX859_05110	1	24310	GX859_05105	14515	15150	NLA55665.1	211	NA	NA	NA	NA	NA
JAAZHI010000111.1	JAAZHI010000111.1_GX859_05110	1	24310	GX859_05110	15344	15688	NLA55666.1	114	NA	NA	NA	NA	NA
JAAZHI010000111.1	JAAZHI010000111.1_GX859_05110	1	24310	GX859_05115	15702	16340	NLA55667.1	212	NA	NA	NA	NA	NA
JAAZHI010000111.1	JAAZHI010000111.1_GX859_05110	1	24310	GX859_05120	16348	17631	NLA55668.1	427	NA	NA	NA	NA	NA
JAAZHI010000111.1	JAAZHI010000111.1_GX859_05110	1	24310	GX859_05125	17630	18235	NLA55669.1	201	NA	NA	NA	NA	NA
JAAZHI010000111.1	JAAZHI010000111.1_GX859_05110	1	24310	GX859_05130	18236	18388	NLA55670.1	50	NA	NA	NA	CC	NA
JAAZHI010000111.1	JAAZHI010000111.1_GX859_05110	1	24310	GX859_05135	18389	19195	NLA55671.1	268	NA	NA	NA	NA	NA
JAAZHI010000111.1	JAAZHI010000111.1_GX859_05110	1	24310	GX859_05140	19298	20518	NLA55672.1	406	NA	NA	NA	NA	NA
JAAZHI010000111.1	JAAZHI010000111.1_GX859_05110	1	24310	GX859_05145	20445	21176	NLA55673.1	243	NA	NA	NA	NA	NA
JAAZHI010000111.1	JAAZHI010000111.1_GX859_05110	1	24310	GX859_05150	21222	21491	NLA55674.1	89	NA	NA	NA	NA	NA
JAAZHI010000111.1	JAAZHI010000111.1_GX859_05110	1	24310	GX859_05155	21722	22618	NLA55675.1	298	NA	NA	NA	NA	NA
JAAZHI010000111.1	JAAZHI010000111.1_GX859_05110	1	24310	GX859_05160	22757	22903	NLA55676.1	48	NA	NA	NA	NA	NA
JAAZHI010000111.1	JAAZHI010000111.1_GX859_05110	1	24310	GX859_05165	22839	23903	NLA55677.1	354	NA	NA	NA	NA	NA
JAAZHI010000111.1	JAAZHI010000111.1_GX859_05110	1	24310	GX859_05170	23978	24310	NLA55678.1	110	NA	NA	NA	NA	NA
JADKMY010000003.1	JADKMY010000003.1_IRY30_09745	241822	315107	IRY30_09495	241822	243546	MBF4554302.1	574	NA	NA	NA	NA	NA
JADKMY010000003.1	JADKMY010000003.1_IRY30_09745	241822	315107	IRY30_09500	243497	244636	MBF4554303.1	379	NA	NA	NA	NA	NA
JADKMY010000003.1	JADKMY010000003.1_IRY30_09745	241822	315107	IRY30_09505	244689	245492	MBF4554304.1	267	NA	NA	NA	NA	NA
JADKMY010000003.1	JADKMY010000003.1_IRY30_09745	241822	315107	IRY30_09510	245800	247029	MBF4554305.1	409	NA	NA	NA	NA	NA
JADKMY010000003.1	JADKMY010000003.1_IRY30_09745	241822	315107	IRY30_09515	247081	249351	MBF4554306.1	756	NA	NA	NA	NA	NA
JADKMY010000003.1	JADKMY010000003.1_IRY30_09745	241822	315107	IRY30_09520	249513	250235	MBF4554307.1	240	NA	NA	NA	NA	NA
JADKMY010000003.1	JADKMY010000003.1_IRY30_09745	241822	315107	IRY30_09525	250269	251726	MBF4554308.1	485	NA	NA	NA	NA	NA
JADKMY010000003.1	JADKMY010000003.1_IRY30_09745	241822	315107	IRY30_09530	252013	253836	MBF4554309.1	607	NA	NA	NA	NA	NA
JADKMY010000003.1	JADKMY010000003.1_IRY30_09745	241822	315107	IRY30_09535	253943	254332	MBF4554310.1	129	NA	NA	NA	NA	NA
JADKMY010000003.1	JADKMY010000003.1_IRY30_09745	241822	315107	IRY30_09540	254332	255189	MBF4554311.1	285	NA	NA	NA	NA	NA
JADKMY010000003.1	JADKMY010000003.1_IRY30_09745	241822	315107	IRY30_09545	255235	256065	MBF4554312.1	276	NA	NA	NA	NA	NA
JADKMY010000003.1	JADKMY010000003.1_IRY30_09745	241822	315107	IRY30_09550	256062	256721	MBF4554313.1	219	NA	NA	NA	CP	TIGR00288 family protein
JADKMY010000003.1	JADKMY010000003.1_IRY30_09745	241822	315107	IRY30_09555	256836	259202	MBF4554314.1	788	NA	NA	NA	NA	NA
JADKMY010000003.1	JADKMY010000003.1_IRY30_09745	241822	315107	IRY30_09560	259202	260281	MBF4554315.1	359	NA	NA	NA	NA	NA
JADKMY010000003.1	JADKMY010000003.1_IRY30_09745	241822	315107	IRY30_09565	260312	260719	MBF4554316.1	135	NA	NA	NA	NA	NA
JADKMY010000003.1	JADKMY010000003.1_IRY30_09745	241822	315107	IRY30_09570	260858	262960	MBF4554317.1	700	NA	NA	NA	NA	NA
JADKMY010000003.1	JADKMY010000003.1_IRY30_09745	241822	315107	IRY30_09575	263067	264308	MBF4554318.1	413	NA	NA	NA	NA	NA
JADKMY010000003.1	JADKMY010000003.1_IRY30_09745	241822	315107	IRY30_09580	264305	265996	MBF4554319.1	563	NA	NA	NA	NA	NA
JADKMY010000003.1	JADKMY010000003.1_IRY30_09745	241822	315107	IRY30_09585	266212	267768	MBF4554320.1	518	NA	NA	NA	NA	NA
JADKMY010000003.1	JADKMY010000003.1_IRY30_09745	241822	315107	IRY30_09590	267820	272838	MBF4554321.1	1672	NA	NA	NA	NA	NA
JADKMY010000003.1	JADKMY010000003.1_IRY30_09745	241822	315107	IRY30_09595	273045	274901	MBF4554322.1	618	NA	NA	NA	NA	NA
JADKMY010000003.1	JADKMY010000003.1_IRY30_09745	241822	315107	IRY30_09600	275151	276074	MBF4554323.1	307	NA	NA	NA	NA	NA
JADKMY010000003.1	JADKMY010000003.1_IRY30_09745	241822	315107	IRY30_09605	276183	276740	MBF4554324.1	185	NA	NA	NA	NA	NA
JADKMY010000003.1	JADKMY010000003.1_IRY30_09745	241822	315107	IRY30_09610	276873	278864	MBF4554325.1	663	NA	NA	NA	NA	NA
JADKMY010000003.1	JADKMY010000003.1_IRY30_09745	241822	315107	IRY30_09615	279313	280335	MBF4554326.1	340	NA	NA	NA	NA	NA
JADKMY010000003.1	JADKMY010000003.1_IRY30_09745	241822	315107	IRY30_09620	280497	281522	MBF4554327.1	341	NA	NA	NA	NA	NA
JADKMY010000003.1	JADKMY010000003.1_IRY30_09745	241822	315107	IRY30_09625	281519	282058	MBF4554328.1	179	NA	NA	NA	NA	NA
JADKMY010000003.1	JADKMY010000003.1_IRY30_09745	241822	315107	IRY30_09630	282220	284325	MBF4554329.1	701	NA	NA	NA	NA	NA
JADKMY010000003.1	JADKMY010000003.1_IRY30_09745	241822	315107	IRY30_09635	284517	286538	MBF4554330.1	673	NA	NA	NA	NA	NA
JADKMY010000003.1	JADKMY010000003.1_IRY30_09745	241822	315107	IRY30_09640	286681	287529	MBF4554331.1	282	NA	NA	NA	NA	NA
JADKMY010000003.1	JADKMY010000003.1_IRY30_09745	241822	315107	IRY30_09645	287822	288991	MBF4554332.1	389	NA	NA	NA	NA	NA
JADKMY010000003.1	JADKMY010000003.1_IRY30_09745	241822	315107	IRY30_09650	289064	289507	MBF4554333.1	147	NA	NA	NA	NA	NA
JADKMY010000003.1	JADKMY010000003.1_IRY30_09745	241822	315107	IRY30_09655	289530	290345	MBF4554334.1	271	NA	NA	NA	NA	NA
JADKMY010000003.1	JADKMY010000003.1_IRY30_09745	241822	315107	IRY30_09660	290387	291187	MBF4554335.1	266	NA	NA	NA	NA	NA
JADKMY010000003.1	JADKMY010000003.1_IRY30_09745	241822	315107	IRY30_09665	291367	292641	MBF4554336.1	424	NA	NA	NA	NA	NA
JADKMY010000003.1	JADKMY010000003.1_IRY30_09745	241822	315107	IRY30_09670	292858	293859	MBF4554337.1	333	NA	NA	NA	NA	NA
JADKMY010000003.1	JADKMY010000003.1_IRY30_09745	241822	315107	IRY30_09675	293867	294217	MBF4554338.1	116	NA	NA	NA	NA	NA
JADKMY010000003.1	JADKMY010000003.1_IRY30_09745	241822	315107	IRY30_09680	294263	295054	MBF4554339.1	263	NA	NA	NA	NA	NA
JADKMY010000003.1	JADKMY010000003.1_IRY30_09745	241822	315107	IRY30_09685	295051	296100	MBF4554340.1	349	NA	NA	NA	NA	NA
JADKMY010000003.1	JADKMY010000003.1_IRY30_09745	241822	315107	IRY30_09690	296132	297484	MBF4554341.1	450	NA	NA	NA	NA	NA
JADKMY010000003.1	JADKMY010000003.1_IRY30_09745	241822	315107	IRY30_09695	297474	298277	MBF4554342.1	267	NA	NA	NA	NA	NA
JADKMY010000003.1	JADKMY010000003.1_IRY30_09745	241822	315107	IRY30_09700	298389	299912	MBF4554343.1	507	NA	NA	NA	NA	NA
JADKMY010000003.1	JADKMY010000003.1_IRY30_09745	241822	315107	IRY30_09705	299913	300827	MBF4554344.1	304	NA	NA	NA	NA	NA
JADKMY010000003.1	JADKMY010000003.1_IRY30_09745	241822	315107	IRY30_09710	300838	301725	MBF4554345.1	295	NA	NA	NA	NA	NA
JADKMY010000003.1	JADKMY010000003.1_IRY30_09745	241822	315107	IRY30_09715	301887	302846	MBF4554346.1	319	NA	NA	NA	NA	NA
JADKMY010000003.1	JADKMY010000003.1_IRY30_09745	241822	315107	IRY30_09720	302999	303601	MBF4554347.1	200	NA	NA	NA	NA	NA
JADKMY010000003.1	JADKMY010000003.1_IRY30_09745	241822	315107	IRY30_09725	303712	304413	MBF4554348.1	233	NA	NA	NA	NA	NA
JADKMY010000003.1	JADKMY010000003.1_IRY30_09745	241822	315107	IRY30_09730	304488	306212	MBF4554349.1	574	NA	NA	NA	NA	NA
JADKMY010000003.1	JADKMY010000003.1_IRY30_09745	241822	315107	IRY30_09735	306365	306994	MBF4554350.1	209	NA	NA	NA	NA	NA
JADKMY010000003.1	JADKMY010000003.1_IRY30_09745	241822	315107	IRY30_09740	307087	308784	MBF4554351.1	565	NA	NA	NA	NA	NA
JADKMY010000003.1	JADKMY010000003.1_IRY30_09745	241822	315107	IRY30_09745	309049	309381	MBF4554352.1	110	NA	NA	NA	NA	NA
JADKMY010000003.1	JADKMY010000003.1_IRY30_09745	241822	315107	IRY30_09750	309497	310462	MBF4554353.1	321	NA	NA	NA	NA	NA
JADKMY010000003.1	JADKMY010000003.1_IRY30_09745	241822	315107	IRY30_09755	310469	311092	MBF4554354.1	207	NA	NA	NA	NA	NA
JADKMY010000003.1	JADKMY010000003.1_IRY30_09745	241822	315107	IRY30_09760	311249	312157	MBF4554355.1	302	NA	NA	NA	NA	NA
JADKMY010000003.1	JADKMY010000003.1_IRY30_09745	241822	315107	IRY30_09765	312392	312553	MBF4554356.1	53	NA	NA	NA	NA	NA
JADKMY010000003.1	JADKMY010000003.1_IRY30_09745	241822	315107	IRY30_09770	312571	313590	MBF4554357.1	339	NA	NA	NA	NA	NA
JADKMY010000003.1	JADKMY010000003.1_IRY30_09745	241822	315107	IRY30_09775	313596	315107	MBF4554358.1	503	NA	MMB_gp29_gp30__gp30	NA	NA	NA
JADQUG010000016.1	JADQUG010000016.1_I4J41_05330	227	43849	I4J41_05275	227	1276	MBG9354034.1	349	NA	NA	NA	NA	NA
JADQUG010000016.1	JADQUG010000016.1_I4J41_05330	227	43849	I4J41_05280	1212	1349	MBG9354035.1	45	NA	NA	NA	NA	NA
JADQUG010000016.1	JADQUG010000016.1_I4J41_05330	227	43849	I4J41_05285	1515	2417	MBG9354036.1	300	NA	NA	NA	NA	NA
JADQUG010000016.1	JADQUG010000016.1_I4J41_05330	227	43849	I4J41_05290	2699	2962	MBG9354037.1	87	NA	NA	NA	NA	NA
JADQUG010000016.1	JADQUG010000016.1_I4J41_05330	227	43849	I4J41_05295	3728	5035	MBG9354038.1	435	NA	NA	NA	NA	NA
JADQUG010000016.1	JADQUG010000016.1_I4J41_05330	227	43849	I4J41_05300	5167	5988	MBG9354039.1	273	NA	NA	NA	NA	NA
JADQUG010000016.1	JADQUG010000016.1_I4J41_05330	227	43849	I4J41_05305	5994	6146	MBG9354040.1	50	NA	NA	NA	NA	NA
JADQUG010000016.1	JADQUG010000016.1_I4J41_05330	227	43849	I4J41_05310	6207	7616	MBG9354041.1	469	NA	NA	NA	NA	NA
JADQUG010000016.1	JADQUG010000016.1_I4J41_05330	227	43849	I4J41_05315	7749	8195	MBG9354042.1	148	NA	NA	NA	NA	NA
JADQUG010000016.1	JADQUG010000016.1_I4J41_05330	227	43849	I4J41_05320	8155	9597	MBG9354043.1	480	NA	NA	NA	NA	NA
JADQUG010000016.1	JADQUG010000016.1_I4J41_05330	227	43849	I4J41_05325	9679	10317	MBG9354044.1	212	NA	Detocs__dtcB	NA	NA	NA
JADQUG010000016.1	JADQUG010000016.1_I4J41_05330	227	43849	I4J41_05330	10376	10693	MBG9354045.1	105	NA	NA	NA	NA	NA
JADQUG010000016.1	JADQUG010000016.1_I4J41_05330	227	43849	I4J41_05335	10853	11485	MBG9354046.1	210	NA	NA	NA	NA	NA
JADQUG010000016.1	JADQUG010000016.1_I4J41_05330	227	43849	I4J41_05340	11598	13169	MBG9354047.1	523	NA	NA	NA	NA	NA
JADQUG010000016.1	JADQUG010000016.1_I4J41_05330	227	43849	I4J41_05345	13186	14535	MBG9354048.1	449	NA	NA	NA	NA	NA
JADQUG010000016.1	JADQUG010000016.1_I4J41_05330	227	43849	I4J41_05350	14532	15068	MBG9354049.1	178	NA	NA	NA	NA	NA
JADQUG010000016.1	JADQUG010000016.1_I4J41_05330	227	43849	I4J41_05355	15316	15915	MBG9354050.1	199	NA	NA	NA	NA	NA
JADQUG010000016.1	JADQUG010000016.1_I4J41_05330	227	43849	I4J41_05360	16069	16731	MBG9354051.1	220	NA	NA	NA	NA	NA
JADQUG010000016.1	JADQUG010000016.1_I4J41_05330	227	43849	I4J41_05365	16938	17765	MBG9354052.1	275	NA	NA	NA	NA	NA
JADQUG010000016.1	JADQUG010000016.1_I4J41_05330	227	43849	I4J41_05370	17753	18982	MBG9354053.1	409	NA	NA	NA	NA	NA
JADQUG010000016.1	JADQUG010000016.1_I4J41_05330	227	43849	I4J41_05375	18979	19896	MBG9354054.1	305	NA	NA	NA	NA	NA
JADQUG010000016.1	JADQUG010000016.1_I4J41_05330	227	43849	I4J41_05380	19953	20678	MBG9354055.1	241	NA	NA	NA	NA	NA
JADQUG010000016.1	JADQUG010000016.1_I4J41_05330	227	43849	I4J41_05385	21043	21999	MBG9354056.1	318	NA	NA	NA	NA	NA
JADQUG010000016.1	JADQUG010000016.1_I4J41_05330	227	43849	I4J41_05390	22145	22828	MBG9354057.1	227	NA	NA	NA	NA	NA
JADQUG010000016.1	JADQUG010000016.1_I4J41_05330	227	43849	I4J41_05395	22840	23745	MBG9354058.1	301	NA	NA	NA	NA	NA
JADQUG010000016.1	JADQUG010000016.1_I4J41_05330	227	43849	I4J41_05400	23807	25600	MBG9354059.1	597	NA	NA	NA	NA	NA
JADQUG010000016.1	JADQUG010000016.1_I4J41_05330	227	43849	I4J41_05405	25791	27281	MBG9354060.1	496	NA	NA	NA	NA	NA
JADQUG010000016.1	JADQUG010000016.1_I4J41_05330	227	43849	I4J41_05410	27410	28687	MBG9354061.1	425	NA	NA	NA	NA	NA
JADQUG010000016.1	JADQUG010000016.1_I4J41_05330	227	43849	I4J41_05415	28716	29411	MBG9354062.1	231	NA	NA	NA	NA	NA
JADQUG010000016.1	JADQUG010000016.1_I4J41_05330	227	43849	I4J41_05420	29408	30544	MBG9354063.1	378	NA	NA	NA	NA	NA
JADQUG010000016.1	JADQUG010000016.1_I4J41_05330	227	43849	I4J41_05425	30580	31482	MBG9354064.1	300	NA	NA	NA	NA	NA
JADQUG010000016.1	JADQUG010000016.1_I4J41_05330	227	43849	I4J41_05430	31527	32153	MBG9354065.1	208	NA	NA	NA	NA	NA
JADQUG010000016.1	JADQUG010000016.1_I4J41_05330	227	43849	I4J41_05435	32139	33386	MBG9354066.1	415	NA	NA	NA	NA	NA
JADQUG010000016.1	JADQUG010000016.1_I4J41_05330	227	43849	I4J41_05440	33461	33808	MBG9354067.1	115	NA	NA	NA	NA	NA
JADQUG010000016.1	JADQUG010000016.1_I4J41_05330	227	43849	I4J41_05445	33815	34816	MBG9354068.1	333	NA	NA	NA	NA	NA
JADQUG010000016.1	JADQUG010000016.1_I4J41_05330	227	43849	I4J41_05450	34818	35591	MBG9354069.1	257	NA	NA	NA	NA	NA
JADQUG010000016.1	JADQUG010000016.1_I4J41_05330	227	43849	I4J41_05455	35689	36948	MBG9354070.1	419	NA	NA	NA	NA	NA
JADQUG010000016.1	JADQUG010000016.1_I4J41_05330	227	43849	I4J41_05460	36978	37805	MBG9354071.1	275	NA	NA	NA	NA	NA
JADQUG010000016.1	JADQUG010000016.1_I4J41_05330	227	43849	I4J41_05465	37818	39650	MBG9354072.1	610	NA	NA	NA	NA	NA
JADQUG010000016.1	JADQUG010000016.1_I4J41_05330	227	43849	I4J41_05470	39846	41570	MBG9354073.1	574	NA	NA	NA	NA	NA
JADQUG010000016.1	JADQUG010000016.1_I4J41_05330	227	43849	I4J41_05475	41570	42310	MBG9354074.1	246	NA	NA	NA	NA	NA
JADQUG010000016.1	JADQUG010000016.1_I4J41_05330	227	43849	I4J41_05480	42329	43849	MBG9354075.1	506	NA	NA	NA	NA	NA
JAEIOT010000011.1	JAEIOT010000011.1_JDV76_09345	489	77480	JDV76_09265	489	1322	MBI9001149.1	277	NA	AbiEii__AbiEii	AbiE	NA	NA
JAEIOT010000011.1	JAEIOT010000011.1_JDV76_09345	489	77480	JDV76_09270	1458	2477	MBI9001150.1	339	NA	AbiEii__AbiEi_4	AbiE	NA	NA
JAEIOT010000011.1	JAEIOT010000011.1_JDV76_09345	489	77480	JDV76_09275	3151	5748	MBI9001151.1	865	NA	NA	NA	NA	NA
JAEIOT010000011.1	JAEIOT010000011.1_JDV76_09345	489	77480	JDV76_09280	5757	6557	MBI9001152.1	266	NA	NA	NA	NA	NA
JAEIOT010000011.1	JAEIOT010000011.1_JDV76_09345	489	77480	JDV76_09285	6688	7746	MBI9001153.1	352	NA	NA	NA	NA	NA
JAEIOT010000011.1	JAEIOT010000011.1_JDV76_09345	489	77480	JDV76_09290	7682	7834	MBI9001154.1	50	NA	NA	NA	NA	NA
JAEIOT010000011.1	JAEIOT010000011.1_JDV76_09345	489	77480	JDV76_09295	7835	8851	MBI9001155.1	338	NA	NA	NA	NA	NA
JAEIOT010000011.1	JAEIOT010000011.1_JDV76_09345	489	77480	JDV76_09300	8972	9898	MBI9001156.1	308	NA	NA	NA	NA	NA
JAEIOT010000011.1	JAEIOT010000011.1_JDV76_09345	489	77480	JDV76_09305	10170	10421	MBI9001157.1	83	NA	NA	NA	NA	NA
JAEIOT010000011.1	JAEIOT010000011.1_JDV76_09345	489	77480	JDV76_09310	10643	11302	MBI9001158.1	219	NA	NA	NA	NA	NA
JAEIOT010000011.1	JAEIOT010000011.1_JDV76_09345	489	77480	JDV76_09315	11290	12567	MBI9001159.1	425	NA	NA	NA	NA	NA
JAEIOT010000011.1	JAEIOT010000011.1_JDV76_09345	489	77480	JDV76_09320	12700	13548	MBI9001160.1	282	NA	NA	NA	NA	NA
JAEIOT010000011.1	JAEIOT010000011.1_JDV76_09345	489	77480	JDV76_09325	13550	13702	MBI9001161.1	50	NA	NA	NA	NA	NA
JAEIOT010000011.1	JAEIOT010000011.1_JDV76_09345	489	77480	JDV76_09330	13699	14151	MBI9001162.1	150	NA	NA	NA	NA	NA
JAEIOT010000011.1	JAEIOT010000011.1_JDV76_09345	489	77480	JDV76_09335	14150	15589	MBI9001163.1	479	NA	NA	NA	NA	NA
JAEIOT010000011.1	JAEIOT010000011.1_JDV76_09345	489	77480	JDV76_09340	15682	16320	MBI9001164.1	212	NA	Detocs__dtcB	NA	NA	NA
JAEIOT010000011.1	JAEIOT010000011.1_JDV76_09345	489	77480	JDV76_09345	16563	16904	MBI9001165.1	113	NA	NA	NA	NA	NA
JAEIOT010000011.1	JAEIOT010000011.1_JDV76_09345	489	77480	JDV76_09350	17456	18094	MBI9001166.1	212	NA	NA	NA	NA	NA
JAEIOT010000011.1	JAEIOT010000011.1_JDV76_09345	489	77480	JDV76_09355	18179	19735	MBI9001167.1	518	NA	NA	NA	NA	NA
JAEIOT010000011.1	JAEIOT010000011.1_JDV76_09345	489	77480	JDV76_09360	19698	21068	MBI9001168.1	456	NA	NA	NA	NA	NA
JAEIOT010000011.1	JAEIOT010000011.1_JDV76_09345	489	77480	JDV76_09365	21078	22328	MBI9001169.1	416	NA	NA	NA	NA	NA
JAEIOT010000011.1	JAEIOT010000011.1_JDV76_09345	489	77480	JDV76_09370	22413	23324	MBI9001170.1	303	NA	NA	NA	NA	NA
JAEIOT010000011.1	JAEIOT010000011.1_JDV76_09345	489	77480	JDV76_09375	23411	24019	MBI9001171.1	202	NA	NA	NA	NA	NA
JAEIOT010000011.1	JAEIOT010000011.1_JDV76_09345	489	77480	JDV76_09380	24276	24956	MBI9001172.1	226	NA	NA	NA	NA	NA
JAEIOT010000011.1	JAEIOT010000011.1_JDV76_09345	489	77480	JDV76_09385	24968	25633	MBI9001173.1	221	NA	gcu167__gcu167B	NA	NA	NA
JAEIOT010000011.1	JAEIOT010000011.1_JDV76_09345	489	77480	JDV76_09390	25761	26171	MBI9001174.1	136	NA	NA	NA	NA	NA
JAEIOT010000011.1	JAEIOT010000011.1_JDV76_09345	489	77480	JDV76_09395	26555	27514	MBI9001175.1	319	NA	NA	NA	NA	NA
JAEIOT010000011.1	JAEIOT010000011.1_JDV76_09345	489	77480	JDV76_09400	27807	28766	MBI9001176.1	319	NA	NA	NA	NA	NA
JAEIOT010000011.1	JAEIOT010000011.1_JDV76_09345	489	77480	JDV76_09405	28940	29611	MBI9001177.1	223	NA	NA	NA	NA	NA
JAEIOT010000011.1	JAEIOT010000011.1_JDV76_09345	489	77480	JDV76_09410	29647	30561	MBI9001178.1	304	NA	NA	NA	NA	NA
JAEIOT010000011.1	JAEIOT010000011.1_JDV76_09345	489	77480	JDV76_09415	30644	32002	MBI9001179.1	452	NA	NA	NA	NA	NA
JAEIOT010000011.1	JAEIOT010000011.1_JDV76_09345	489	77480	JDV76_09420	32023	32703	MBI9001180.1	226	NA	NA	NA	NA	NA
JAEIOT010000011.1	JAEIOT010000011.1_JDV76_09345	489	77480	JDV76_09425	32784	34022	MBI9001181.1	412	NA	NA	NA	NA	NA
JAEIOT010000011.1	JAEIOT010000011.1_JDV76_09345	489	77480	JDV76_09430	34081	34929	MBI9001182.1	282	NA	NA	NA	NA	NA
JAEIOT010000011.1	JAEIOT010000011.1_JDV76_09345	489	77480	JDV76_09435	35244	36503	MBI9001183.1	419	NA	NA	NA	NA	NA
JAEIOT010000011.1	JAEIOT010000011.1_JDV76_09345	489	77480	JDV76_09440	36525	39470	MBI9001184.1	981	NA	NA	NA	NA	NA
JAEIOT010000011.1	JAEIOT010000011.1_JDV76_09345	489	77480	JDV76_09445	39538	40902	MBI9001185.1	454	NA	NA	NA	NA	NA
JAEIOT010000011.1	JAEIOT010000011.1_JDV76_09345	489	77480	JDV76_09450	41006	41872	MBI9001186.1	288	NA	NA	NA	NA	NA
JAEIOT010000011.1	JAEIOT010000011.1_JDV76_09345	489	77480	JDV76_09455	41906	42757	MBI9001187.1	283	NA	NA	NA	NA	NA
JAEIOT010000011.1	JAEIOT010000011.1_JDV76_09345	489	77480	JDV76_09460	42810	43007	MBI9001188.1	65	NA	NA	NA	NA	NA
JAEIOT010000011.1	JAEIOT010000011.1_JDV76_09345	489	77480	JDV76_09465	43866	45038	MBI9001189.1	390	NA	NA	NA	NA	NA
JAEIOT010000011.1	JAEIOT010000011.1_JDV76_09345	489	77480	JDV76_09470	45022	46305	MBI9001190.1	427	NA	NA	NA	NA	NA
JAEIOT010000011.1	JAEIOT010000011.1_JDV76_09345	489	77480	JDV76_09475	46962	48095	MBI9001191.1	377	NA	NA	NA	NA	NA
JAEIOT010000011.1	JAEIOT010000011.1_JDV76_09345	489	77480	JDV76_09480	48284	49000	MBI9001192.1	238	NA	NA	NA	NA	NA
JAEIOT010000011.1	JAEIOT010000011.1_JDV76_09345	489	77480	JDV76_09485	49034	49834	MBI9001193.1	266	NA	NA	NA	NA	NA
JAEIOT010000011.1	JAEIOT010000011.1_JDV76_09345	489	77480	JDV76_09490	49881	51161	MBI9001194.1	426	NA	NA	NA	NA	NA
JAEIOT010000011.1	JAEIOT010000011.1_JDV76_09345	489	77480	JDV76_09495	51535	54024	MBI9001195.1	829	NA	NA	NA	NA	NA
JAEIOT010000011.1	JAEIOT010000011.1_JDV76_09345	489	77480	JDV76_09500	54021	54827	MBI9001196.1	268	NA	NA	NA	NA	NA
JAEIOT010000011.1	JAEIOT010000011.1_JDV76_09345	489	77480	JDV76_09505	55281	57065	MBI9001197.1	594	NA	NA	NA	NA	NA
JAEIOT010000011.1	JAEIOT010000011.1_JDV76_09345	489	77480	JDV76_09510	57093	57437	MBI9001198.1	114	NA	NA	NA	NA	NA
JAEIOT010000011.1	JAEIOT010000011.1_JDV76_09345	489	77480	JDV76_09515	57467	58492	MBI9001199.1	341	NA	NA	NA	NA	NA
JAEIOT010000011.1	JAEIOT010000011.1_JDV76_09345	489	77480	JDV76_09520	58583	59350	MBI9001200.1	255	NA	NA	NA	NA	NA
JAEIOT010000011.1	JAEIOT010000011.1_JDV76_09345	489	77480	JDV76_09525	59452	60711	MBI9001201.1	419	NA	NA	NA	NA	NA
JAEIOT010000011.1	JAEIOT010000011.1_JDV76_09345	489	77480	JDV76_09530	60801	61769	MBI9001202.1	322	NA	NA	NA	NA	NA
JAEIOT010000011.1	JAEIOT010000011.1_JDV76_09345	489	77480	JDV76_09535	61766	62590	MBI9001203.1	274	NA	NA	NA	NA	NA
JAEIOT010000011.1	JAEIOT010000011.1_JDV76_09345	489	77480	JDV76_09540	62894	63538	MBI9001204.1	214	NA	NA	NA	NA	NA
JAEIOT010000011.1	JAEIOT010000011.1_JDV76_09345	489	77480	JDV76_09545	63616	65640	MBI9001205.1	674	NA	NA	NA	NA	NA
JAEIOT010000011.1	JAEIOT010000011.1_JDV76_09345	489	77480	JDV76_09550	65837	66022	MBI9001206.1	61	NA	NA	NA	NA	NA
JAEIOT010000011.1	JAEIOT010000011.1_JDV76_09345	489	77480	JDV76_09555	66019	67218	MBI9001207.1	399	NA	NA	NA	NA	NA
JAEIOT010000011.1	JAEIOT010000011.1_JDV76_09345	489	77480	JDV76_09560	67220	68629	MBI9001208.1	469	NA	NA	NA	NA	NA
JAEIOT010000011.1	JAEIOT010000011.1_JDV76_09345	489	77480	JDV76_09565	68838	70865	MBI9001209.1	675	NA	NA	NA	NA	NA
JAEIOT010000011.1	JAEIOT010000011.1_JDV76_09345	489	77480	JDV76_09570	70858	71370	MBI9001210.1	170	NA	NA	NA	NA	NA
JAEIOT010000011.1	JAEIOT010000011.1_JDV76_09345	489	77480	JDV76_09575	71367	72347	MBI9001211.1	326	NA	NA	NA	NA	NA
JAEIOT010000011.1	JAEIOT010000011.1_JDV76_09345	489	77480	JDV76_09580	72488	73513	MBI9001212.1	341	NA	NA	NA	NA	NA
JAEIOT010000011.1	JAEIOT010000011.1_JDV76_09345	489	77480	JDV76_09585	73967	75955	MBI9001213.1	662	NA	NA	NA	NA	NA
JAEIOT010000011.1	JAEIOT010000011.1_JDV76_09345	489	77480	JDV76_09590	75955	76494	MBI9001214.1	179	NA	NA	NA	NA	NA
JAEIOT010000011.1	JAEIOT010000011.1_JDV76_09345	489	77480	JDV76_09595	76500	77480	MBI9001215.1	326	NA	NA	NA	NA	NA
JAENIP010000007.1	JAENIP010000007.1_JIM95_01240	270	77028	JIM95_01155	270	530	MBK1843185.1	86	NA	NA	NA	NA	NA
JAENIP010000007.1	JAENIP010000007.1_JIM95_01240	270	77028	JIM95_01160	589	1101	MBK1843186.1	170	NA	AbiEii__AbiEii	AbiE	NA	NA
JAENIP010000007.1	JAENIP010000007.1_JIM95_01240	270	77028	JIM95_01165	1182	2261	MBK1843187.1	359	NA	AbiEii__AbiEi_4	AbiE	NA	NA
JAENIP010000007.1	JAENIP010000007.1_JIM95_01240	270	77028	JIM95_01170	2940	5537	MBK1843188.1	865	NA	NA	NA	NA	NA
JAENIP010000007.1	JAENIP010000007.1_JIM95_01240	270	77028	JIM95_01175	5545	6318	MBK1843189.1	257	NA	NA	NA	NA	NA
JAENIP010000007.1	JAENIP010000007.1_JIM95_01240	270	77028	JIM95_01180	6484	7497	MBK1843190.1	337	NA	NA	NA	NA	NA
JAENIP010000007.1	JAENIP010000007.1_JIM95_01240	270	77028	JIM95_01185	7478	7630	MBK1843191.1	50	NA	NA	NA	NA	NA
JAENIP010000007.1	JAENIP010000007.1_JIM95_01240	270	77028	JIM95_01190	7646	8662	MBK1843192.1	338	NA	NA	NA	NA	NA
JAENIP010000007.1	JAENIP010000007.1_JIM95_01240	270	77028	JIM95_01195	8783	9709	MBK1843193.1	308	NA	NA	NA	NA	NA
JAENIP010000007.1	JAENIP010000007.1_JIM95_01240	270	77028	JIM95_01200	9990	10241	MBK1843194.1	83	NA	NA	NA	NA	NA
JAENIP010000007.1	JAENIP010000007.1_JIM95_01240	270	77028	JIM95_01205	10460	11119	MBK1843195.1	219	NA	NA	NA	NA	NA
JAENIP010000007.1	JAENIP010000007.1_JIM95_01240	270	77028	JIM95_01210	11107	12438	MBK1843196.1	443	NA	NA	NA	NA	NA
JAENIP010000007.1	JAENIP010000007.1_JIM95_01240	270	77028	JIM95_01215	12577	13416	MBK1843197.1	279	NA	NA	NA	NA	NA
JAENIP010000007.1	JAENIP010000007.1_JIM95_01240	270	77028	JIM95_01220	13418	13570	MBK1843198.1	50	NA	NA	NA	NA	NA
JAENIP010000007.1	JAENIP010000007.1_JIM95_01240	270	77028	JIM95_01225	13567	14169	MBK1843199.1	200	NA	NA	NA	NA	NA
JAENIP010000007.1	JAENIP010000007.1_JIM95_01240	270	77028	JIM95_01230	14168	15457	MBK1843200.1	429	NA	NA	NA	NA	NA
JAENIP010000007.1	JAENIP010000007.1_JIM95_01240	270	77028	JIM95_01235	15546	16184	MBK1843201.1	212	NA	Detocs__dtcB	NA	NA	NA
JAENIP010000007.1	JAENIP010000007.1_JIM95_01240	270	77028	JIM95_01240	16427	16765	MBK1843202.1	112	NA	NA	NA	NA	NA
JAENIP010000007.1	JAENIP010000007.1_JIM95_01240	270	77028	JIM95_01245	17317	17955	MBK1843203.1	212	NA	NA	NA	NA	NA
JAENIP010000007.1	JAENIP010000007.1_JIM95_01240	270	77028	JIM95_01250	18040	19569	MBK1843204.1	509	NA	NA	NA	NA	NA
JAENIP010000007.1	JAENIP010000007.1_JIM95_01240	270	77028	JIM95_01255	19559	20929	MBK1843205.1	456	NA	NA	NA	NA	NA
JAENIP010000007.1	JAENIP010000007.1_JIM95_01240	270	77028	JIM95_01260	20939	22189	MBK1843206.1	416	NA	NA	NA	NA	NA
JAENIP010000007.1	JAENIP010000007.1_JIM95_01240	270	77028	JIM95_01265	22272	23192	MBK1843207.1	306	NA	NA	NA	NA	NA
JAENIP010000007.1	JAENIP010000007.1_JIM95_01240	270	77028	JIM95_01270	23344	24381	MBK1843208.1	345	NA	NA	NA	NA	NA
JAENIP010000007.1	JAENIP010000007.1_JIM95_01240	270	77028	JIM95_01275	24474	25452	NA	326	NA	NA	NA	NA	NA
JAENIP010000007.1	JAENIP010000007.1_JIM95_01240	270	77028	JIM95_01280	25509	26558	MBK1843209.1	349	NA	NA	NA	NA	NA
JAENIP010000007.1	JAENIP010000007.1_JIM95_01240	270	77028	JIM95_01285	26555	27391	MBK1843210.1	278	NA	NA	NA	NA	NA
JAENIP010000007.1	JAENIP010000007.1_JIM95_01240	270	77028	JIM95_01290	27465	28073	MBK1843211.1	202	NA	NA	NA	NA	NA
JAENIP010000007.1	JAENIP010000007.1_JIM95_01240	270	77028	JIM95_01295	28330	29022	MBK1843212.1	230	NA	NA	NA	NA	NA
JAENIP010000007.1	JAENIP010000007.1_JIM95_01240	270	77028	JIM95_01300	29130	30323	MBK1843213.1	397	NA	NA	NA	NA	NA
JAENIP010000007.1	JAENIP010000007.1_JIM95_01240	270	77028	JIM95_01305	30493	31236	MBK1843214.1	247	NA	gcu167__gcu167B	NA	NA	NA
JAENIP010000007.1	JAENIP010000007.1_JIM95_01240	270	77028	JIM95_01310	31364	31969	MBK1843215.1	201	NA	NA	NA	NA	NA
JAENIP010000007.1	JAENIP010000007.1_JIM95_01240	270	77028	JIM95_01315	32146	33108	MBK1843216.1	320	NA	NA	NA	NA	NA
JAENIP010000007.1	JAENIP010000007.1_JIM95_01240	270	77028	JIM95_01320	33266	34018	MBK1843217.1	250	NA	NA	NA	NA	NA
JAENIP010000007.1	JAENIP010000007.1_JIM95_01240	270	77028	JIM95_01325	34054	34968	MBK1843218.1	304	NA	NA	NA	NA	NA
JAENIP010000007.1	JAENIP010000007.1_JIM95_01240	270	77028	JIM95_01330	35051	36412	MBK1843219.1	453	NA	NA	NA	NA	NA
JAENIP010000007.1	JAENIP010000007.1_JIM95_01240	270	77028	JIM95_01335	36433	37113	MBK1843220.1	226	NA	NA	NA	NA	NA
JAENIP010000007.1	JAENIP010000007.1_JIM95_01240	270	77028	JIM95_01340	37194	38432	MBK1843221.1	412	NA	NA	NA	NA	NA
JAENIP010000007.1	JAENIP010000007.1_JIM95_01240	270	77028	JIM95_01345	38492	39334	MBK1843222.1	280	NA	NA	NA	NA	NA
JAENIP010000007.1	JAENIP010000007.1_JIM95_01240	270	77028	JIM95_01350	39794	40138	MBK1843223.1	114	NA	NA	NA	NA	NA
JAENIP010000007.1	JAENIP010000007.1_JIM95_01240	270	77028	JIM95_01355	40168	41187	MBK1843224.1	339	NA	NA	NA	NA	NA
JAENIP010000007.1	JAENIP010000007.1_JIM95_01240	270	77028	JIM95_01360	41266	42033	MBK1843225.1	255	NA	AbiEii__AbiEi_4	NA	NA	NA
JAENIP010000007.1	JAENIP010000007.1_JIM95_01240	270	77028	JIM95_01365	42134	43393	MBK1843226.1	419	NA	NA	NA	NA	NA
JAENIP010000007.1	JAENIP010000007.1_JIM95_01240	270	77028	JIM95_01370	43483	44451	MBK1843227.1	322	NA	NA	NA	NA	NA
JAENIP010000007.1	JAENIP010000007.1_JIM95_01240	270	77028	JIM95_01375	44448	45272	MBK1843228.1	274	NA	NA	NA	NA	NA
JAENIP010000007.1	JAENIP010000007.1_JIM95_01240	270	77028	JIM95_01380	45574	46218	MBK1843229.1	214	NA	NA	NA	NA	NA
JAENIP010000007.1	JAENIP010000007.1_JIM95_01240	270	77028	JIM95_01385	46309	48402	MBK1843230.1	697	NA	NA	NA	NA	NA
JAENIP010000007.1	JAENIP010000007.1_JIM95_01240	270	77028	JIM95_01390	48791	49993	MBK1843231.1	400	NA	NA	NA	NA	NA
JAENIP010000007.1	JAENIP010000007.1_JIM95_01240	270	77028	JIM95_01395	49995	51398	MBK1843232.1	467	NA	NA	NA	NA	NA
JAENIP010000007.1	JAENIP010000007.1_JIM95_01240	270	77028	JIM95_01400	51585	53612	MBK1843233.1	675	NA	NA	NA	NA	NA
JAENIP010000007.1	JAENIP010000007.1_JIM95_01240	270	77028	JIM95_01405	53605	54117	MBK1843234.1	170	NA	NA	NA	NA	NA
JAENIP010000007.1	JAENIP010000007.1_JIM95_01240	270	77028	JIM95_01410	54114	55094	MBK1843235.1	326	NA	NA	NA	NA	NA
JAENIP010000007.1	JAENIP010000007.1_JIM95_01240	270	77028	JIM95_01415	55251	56279	MBK1843236.1	342	NA	NA	NA	NA	NA
JAENIP010000007.1	JAENIP010000007.1_JIM95_01240	270	77028	JIM95_01420	56737	58725	MBK1843237.1	662	NA	NA	NA	NA	NA
JAENIP010000007.1	JAENIP010000007.1_JIM95_01240	270	77028	JIM95_01425	58725	59279	MBK1843238.1	184	NA	NA	NA	NA	NA
JAENIP010000007.1	JAENIP010000007.1_JIM95_01240	270	77028	JIM95_01430	59285	60265	MBK1843239.1	326	NA	NA	NA	NA	NA
JAENIP010000007.1	JAENIP010000007.1_JIM95_01240	270	77028	JIM95_01435	60375	62219	MBK1843240.1	614	NA	NA	NA	NA	NA
JAENIP010000007.1	JAENIP010000007.1_JIM95_01240	270	77028	JIM95_01440	62414	67219	MBK1843241.1	1601	NA	NA	NA	NA	NA
JAENIP010000007.1	JAENIP010000007.1_JIM95_01240	270	77028	JIM95_01445	67244	68794	MBK1843242.1	516	NA	NA	NA	NA	NA
JAENIP010000007.1	JAENIP010000007.1_JIM95_01240	270	77028	JIM95_01450	68916	69170	MBK1843243.1	84	NA	NA	NA	NA	NA
JAENIP010000007.1	JAENIP010000007.1_JIM95_01240	270	77028	JIM95_01455	70076	70564	MBK1843244.1	162	NA	NA	NA	NA	NA
JAENIP010000007.1	JAENIP010000007.1_JIM95_01240	270	77028	JIM95_01460	70655	71821	MBK1843245.1	388	NA	NA	NA	NA	NA
JAENIP010000007.1	JAENIP010000007.1_JIM95_01240	270	77028	JIM95_01465	71923	72759	MBK1843246.1	278	NA	NA	NA	NA	NA
JAENIP010000007.1	JAENIP010000007.1_JIM95_01240	270	77028	JIM95_01470	72897	73733	MBK1843247.1	278	NA	NA	NA	NA	NA
JAENIP010000007.1	JAENIP010000007.1_JIM95_01240	270	77028	JIM95_01475	73761	74720	MBK1843248.1	319	NA	NA	NA	NA	NA
JAENIP010000007.1	JAENIP010000007.1_JIM95_01240	270	77028	JIM95_01480	74752	75648	MBK1843249.1	298	NA	NA	NA	NA	NA
JAENIP010000007.1	JAENIP010000007.1_JIM95_01240	270	77028	JIM95_01485	76244	76687	MBK1843250.1	147	NA	NA	NA	NA	NA
JAENIP010000007.1	JAENIP010000007.1_JIM95_01240	270	77028	JIM95_01490	76744	77028	MBK1843251.1	94	NA	NA	NA	NA	NA
JAGINY010000001.1	JAGINY010000001.1_JOF33_000128	89646	224953	JOF33_000078	89646	90656	MBP2331379.1	336	NA	NA	NA	NA	NA
JAGINY010000001.1	JAGINY010000001.1_JOF33_000128	89646	224953	JOF33_000079	90614	91801	MBP2331380.1	395	NA	NA	NA	NA	NA
JAGINY010000001.1	JAGINY010000001.1_JOF33_000128	89646	224953	JOF33_000080	91872	92192	MBP2331381.1	106	NA	NA	NA	NA	NA
JAGINY010000001.1	JAGINY010000001.1_JOF33_000128	89646	224953	JOF33_000081	92234	93169	MBP2331382.1	311	NA	NA	NA	NA	NA
JAGINY010000001.1	JAGINY010000001.1_JOF33_000128	89646	224953	JOF33_000082	93279	93917	MBP2331383.1	212	NA	NA	NA	NA	NA
JAGINY010000001.1	JAGINY010000001.1_JOF33_000128	89646	224953	JOF33_000083	93935	94576	MBP2331384.1	213	NA	NA	NA	NA	NA
JAGINY010000001.1	JAGINY010000001.1_JOF33_000128	89646	224953	JOF33_000084	94651	98271	MBP2331385.1	1206	NA	NA	NA	NA	NA
JAGINY010000001.1	JAGINY010000001.1_JOF33_000128	89646	224953	JOF33_000085	98264	100978	MBP2331386.1	904	NA	NA	NA	NA	NA
JAGINY010000001.1	JAGINY010000001.1_JOF33_000128	89646	224953	JOF33_000086	101002	102123	MBP2331387.1	373	NA	NA	NA	NA	NA
JAGINY010000001.1	JAGINY010000001.1_JOF33_000128	89646	224953	JOF33_000087	102173	103654	MBP2331388.1	493	NA	NA	NA	NA	NA
JAGINY010000001.1	JAGINY010000001.1_JOF33_000128	89646	224953	JOF33_000088	103760	104392	MBP2331389.1	210	NA	NA	NA	NA	NA
JAGINY010000001.1	JAGINY010000001.1_JOF33_000128	89646	224953	JOF33_000089	104382	105281	MBP2331390.1	299	NA	NA	NA	NA	NA
JAGINY010000001.1	JAGINY010000001.1_JOF33_000128	89646	224953	JOF33_000090	105278	105628	MBP2331391.1	116	NA	NA	NA	NA	NA
JAGINY010000001.1	JAGINY010000001.1_JOF33_000128	89646	224953	JOF33_000091	105914	107026	MBP2331392.1	370	NA	NA	NA	NA	NA
JAGINY010000001.1	JAGINY010000001.1_JOF33_000128	89646	224953	JOF33_000092	107218	108213	MBP2331393.1	331	NA	NA	NA	NA	NA
JAGINY010000001.1	JAGINY010000001.1_JOF33_000128	89646	224953	JOF33_000093	108388	109047	MBP2331394.1	219	NA	NA	NA	NA	NA
JAGINY010000001.1	JAGINY010000001.1_JOF33_000128	89646	224953	JOF33_000094	109102	112812	MBP2331395.1	1236	NA	RM__Type_I_REases_FAM_2.einsi_trimmed	RM_Type_I	NA	NA
JAGINY010000001.1	JAGINY010000001.1_JOF33_000128	89646	224953	JOF33_000095	112925	114055	MBP2331396.1	376	NA	RM__Type_I_S_03	RM_Type_I	NA	NA
JAGINY010000001.1	JAGINY010000001.1_JOF33_000128	89646	224953	JOF33_000096	114052	115623	MBP2331397.1	523	NA	RM__Type_I_MTases_FAM_1	RM_Type_I	NA	NA
JAGINY010000001.1	JAGINY010000001.1_JOF33_000128	89646	224953	JOF33_000097	115863	117635	MBP2331398.1	590	NA	NA	NA	NA	NA
JAGINY010000001.1	JAGINY010000001.1_JOF33_000128	89646	224953	JOF33_000098	117703	120636	MBP2331399.1	977	NA	NA	NA	NA	NA
JAGINY010000001.1	JAGINY010000001.1_JOF33_000128	89646	224953	JOF33_000099	121217	121633	MBP2331400.1	138	NA	NA	NA	NA	NA
JAGINY010000001.1	JAGINY010000001.1_JOF33_000128	89646	224953	JOF33_000100	121792	122640	MBP2331401.1	282	NA	NA	NA	NA	NA
JAGINY010000001.1	JAGINY010000001.1_JOF33_000128	89646	224953	JOF33_000101	122807	123298	MBP2331402.1	163	NA	NA	NA	NA	NA
JAGINY010000001.1	JAGINY010000001.1_JOF33_000128	89646	224953	JOF33_000102	123641	124723	MBP2331403.1	360	NA	NA	NA	NA	NA
JAGINY010000001.1	JAGINY010000001.1_JOF33_000128	89646	224953	JOF33_000103	124903	125274	MBP2331404.1	123	NA	NA	NA	NA	NA
JAGINY010000001.1	JAGINY010000001.1_JOF33_000128	89646	224953	JOF33_000104	125301	127727	MBP2331405.1	808	NA	NA	NA	NA	NA
JAGINY010000001.1	JAGINY010000001.1_JOF33_000128	89646	224953	JOF33_000105	127867	128055	MBP2331406.1	62	NA	NA	NA	NA	NA
JAGINY010000001.1	JAGINY010000001.1_JOF33_000128	89646	224953	JOF33_000106	128311	128598	MBP2331407.1	95	NA	NA	NA	NA	NA
JAGINY010000001.1	JAGINY010000001.1_JOF33_000128	89646	224953	JOF33_000107	128699	129292	MBP2331408.1	197	NA	vcrx091	NA	NA	NA
JAGINY010000001.1	JAGINY010000001.1_JOF33_000128	89646	224953	JOF33_000108	129353	129805	MBP2331409.1	150	NA	NA	NA	NA	NA
JAGINY010000001.1	JAGINY010000001.1_JOF33_000128	89646	224953	JOF33_000109	129934	130200	MBP2331410.1	88	NA	NA	NA	NA	NA
JAGINY010000001.1	JAGINY010000001.1_JOF33_000128	89646	224953	JOF33_000110	130393	131922	MBP2331411.1	509	NA	NA	NA	NA	NA
JAGINY010000001.1	JAGINY010000001.1_JOF33_000128	89646	224953	JOF33_000111	132090	133262	MBP2331412.1	390	NA	NA	NA	NA	NA
JAGINY010000001.1	JAGINY010000001.1_JOF33_000128	89646	224953	JOF33_000112	133259	134113	MBP2331413.1	284	NA	NA	NA	NA	NA
JAGINY010000001.1	JAGINY010000001.1_JOF33_000128	89646	224953	JOF33_000113	134311	134709	MBP2331414.1	132	NA	NA	NA	NA	NA
JAGINY010000001.1	JAGINY010000001.1_JOF33_000128	89646	224953	JOF33_000114	134781	135860	MBP2331415.1	359	NA	NA	NA	NA	NA
JAGINY010000001.1	JAGINY010000001.1_JOF33_000128	89646	224953	JOF33_000115	136034	136981	MBP2331416.1	315	NA	Type-III-B_CnuA	NA	NA	NA
JAGINY010000001.1	JAGINY010000001.1_JOF33_000128	89646	224953	JOF33_000116	137091	138599	MBP2331417.1	502	NA	NA	NA	NA	NA
JAGINY010000001.1	JAGINY010000001.1_JOF33_000128	89646	224953	JOF33_000117	138750	139952	MBP2331418.1	400	NA	NA	NA	NA	NA
JAGINY010000001.1	JAGINY010000001.1_JOF33_000128	89646	224953	JOF33_000118	145837	146292	MBP2331419.1	151	NA	NA	NA	NA	NA
JAGINY010000001.1	JAGINY010000001.1_JOF33_000128	89646	224953	JOF33_000119	146391	149093	MBP2331420.1	900	NA	NA	NA	NA	NA
JAGINY010000001.1	JAGINY010000001.1_JOF33_000128	89646	224953	JOF33_000120	149090	149854	MBP2331421.1	254	NA	NA	NA	NA	NA
JAGINY010000001.1	JAGINY010000001.1_JOF33_000128	89646	224953	JOF33_000121	149900	150916	MBP2331422.1	338	NA	NA	NA	NA	NA
JAGINY010000001.1	JAGINY010000001.1_JOF33_000128	89646	224953	JOF33_000122	150934	151992	MBP2331423.1	352	NA	NA	NA	NA	NA
JAGINY010000001.1	JAGINY010000001.1_JOF33_000128	89646	224953	JOF33_000123	152115	153017	MBP2331424.1	300	NA	NA	NA	NA	NA
JAGINY010000001.1	JAGINY010000001.1_JOF33_000128	89646	224953	JOF33_000124	153261	153554	MBP2331425.1	97	NA	NA	NA	NA	NA
JAGINY010000001.1	JAGINY010000001.1_JOF33_000128	89646	224953	JOF33_000125	153779	154756	MBP2331426.1	325	NA	AbiEii__AbiEi_1	NA	NA	NA
JAGINY010000001.1	JAGINY010000001.1_JOF33_000128	89646	224953	JOF33_000126	155139	155750	MBP2331427.1	203	NA	NA	NA	NA	NA
JAGINY010000001.1	JAGINY010000001.1_JOF33_000128	89646	224953	JOF33_000127	155692	157053	MBP2331428.1	453	NA	NA	NA	NA	NA
JAGINY010000001.1	JAGINY010000001.1_JOF33_000128	89646	224953	JOF33_000128	157199	157552	MBP2331429.1	117	NA	NA	NA	NA	NA
JAGINY010000001.1	JAGINY010000001.1_JOF33_000128	89646	224953	JOF33_000129	157875	159191	MBP2331430.1	438	NA	NA	NA	NA	NA
JAGINY010000001.1	JAGINY010000001.1_JOF33_000128	89646	224953	JOF33_000130	159350	161050	MBP2331431.1	566	NA	NA	NA	NA	NA
JAGINY010000001.1	JAGINY010000001.1_JOF33_000128	89646	224953	JOF33_000131	161258	162010	MBP2331432.1	250	NA	NA	NA	NA	NA
JAGINY010000001.1	JAGINY010000001.1_JOF33_000128	89646	224953	JOF33_000132	162110	163924	MBP2331433.1	604	NA	NA	NA	NA	NA
JAGINY010000001.1	JAGINY010000001.1_JOF33_000128	89646	224953	JOF33_000133	163966	164832	MBP2331434.1	288	NA	NA	NA	NA	NA
JAGINY010000001.1	JAGINY010000001.1_JOF33_000128	89646	224953	JOF33_000134	165037	165585	MBP2331435.1	182	NA	NA	NA	NA	NA
JAGINY010000001.1	JAGINY010000001.1_JOF33_000128	89646	224953	JOF33_000135	165586	166971	MBP2331436.1	461	NA	NA	NA	NA	NA
JAGINY010000001.1	JAGINY010000001.1_JOF33_000128	89646	224953	JOF33_000136	167562	168164	MBP2331437.1	200	NA	NA	NA	NA	NA
JAGINY010000001.1	JAGINY010000001.1_JOF33_000128	89646	224953	JOF33_000137	168488	169105	MBP2331438.1	205	NA	NA	NA	NA	NA
JAGINY010000001.1	JAGINY010000001.1_JOF33_000128	89646	224953	JOF33_000138	169153	169356	MBP2331439.1	67	NA	NA	NA	NA	NA
JAGINY010000001.1	JAGINY010000001.1_JOF33_000128	89646	224953	JOF33_000139	169545	169715	MBP2331440.1	56	NA	NA	NA	NA	NA
JAGINY010000001.1	JAGINY010000001.1_JOF33_000128	89646	224953	JOF33_000140	169876	171708	MBP2331441.1	610	NA	NA	NA	NA	NA
JAGINY010000001.1	JAGINY010000001.1_JOF33_000128	89646	224953	JOF33_000141	171966	172934	MBP2331442.1	322	NA	NA	NA	NA	NA
JAGINY010000001.1	JAGINY010000001.1_JOF33_000128	89646	224953	JOF33_000142	173011	173787	MBP2331443.1	258	NA	NA	NA	NA	NA
JAGINY010000001.1	JAGINY010000001.1_JOF33_000128	89646	224953	JOF33_000143	173997	175991	MBP2331444.1	664	NA	NA	NA	NA	NA
JAGINY010000001.1	JAGINY010000001.1_JOF33_000128	89646	224953	JOF33_000144	175988	177091	MBP2331445.1	367	NA	NA	NA	NA	NA
JAGINY010000001.1	JAGINY010000001.1_JOF33_000128	89646	224953	JOF33_000145	177091	178122	MBP2331446.1	343	NA	NA	NA	NA	NA
JAGINY010000001.1	JAGINY010000001.1_JOF33_000128	89646	224953	JOF33_000146	178172	179101	MBP2331447.1	309	NA	NA	NA	NA	NA
JAGINY010000001.1	JAGINY010000001.1_JOF33_000128	89646	224953	JOF33_000147	179143	180621	MBP2331448.1	492	NA	NA	NA	NA	NA
JAGINY010000001.1	JAGINY010000001.1_JOF33_000128	89646	224953	JOF33_000148	180690	181517	MBP2331449.1	275	NA	NA	NA	NA	NA
JAGINY010000001.1	JAGINY010000001.1_JOF33_000128	89646	224953	JOF33_000149	181554	183014	MBP2331450.1	486	NA	NA	NA	NA	NA
JAGINY010000001.1	JAGINY010000001.1_JOF33_000128	89646	224953	JOF33_000150	183335	183925	MBP2331451.1	196	NA	NA	NA	NA	NA
JAGINY010000001.1	JAGINY010000001.1_JOF33_000128	89646	224953	JOF33_000151	183991	184788	MBP2331452.1	265	NA	NA	NA	NA	NA
JAGINY010000001.1	JAGINY010000001.1_JOF33_000128	89646	224953	JOF33_000152	184785	186236	MBP2331453.1	483	NA	NA	NA	NA	NA
JAGINY010000001.1	JAGINY010000001.1_JOF33_000128	89646	224953	JOF33_000153	186274	187209	MBP2331454.1	311	NA	NA	NA	NA	NA
JAGINY010000001.1	JAGINY010000001.1_JOF33_000128	89646	224953	JOF33_000154	187206	187982	MBP2331455.1	258	NA	NA	NA	NA	NA
JAGINY010000001.1	JAGINY010000001.1_JOF33_000128	89646	224953	JOF33_000155	188009	188353	MBP2331456.1	114	NA	NA	NA	NA	NA
JAGINY010000001.1	JAGINY010000001.1_JOF33_000128	89646	224953	JOF33_000156	188437	189519	MBP2331457.1	360	NA	NA	NA	NA	NA
JAGINY010000001.1	JAGINY010000001.1_JOF33_000128	89646	224953	JOF33_000157	189685	190335	MBP2331458.1	216	NA	NA	NA	NA	NA
JAGINY010000001.1	JAGINY010000001.1_JOF33_000128	89646	224953	JOF33_000158	190462	191739	MBP2331459.1	425	NA	NA	NA	NA	NA
JAGINY010000001.1	JAGINY010000001.1_JOF33_000128	89646	224953	JOF33_000159	191743	192666	MBP2331460.1	307	NA	NA	NA	NA	NA
JAGINY010000001.1	JAGINY010000001.1_JOF33_000128	89646	224953	JOF33_000160	192673	193572	MBP2331461.1	299	NA	NA	NA	NA	NA
JAGINY010000001.1	JAGINY010000001.1_JOF33_000128	89646	224953	JOF33_000161	193666	195933	MBP2331462.1	755	NA	NA	NA	NA	NA
JAGINY010000001.1	JAGINY010000001.1_JOF33_000128	89646	224953	JOF33_000162	196301	197503	MBP2331463.1	400	NA	NA	NA	NA	NA
JAGINY010000001.1	JAGINY010000001.1_JOF33_000128	89646	224953	JOF33_000163	197639	199642	MBP2331464.1	667	NA	NA	NA	NA	NA
JAGINY010000001.1	JAGINY010000001.1_JOF33_000128	89646	224953	JOF33_000164	199997	202003	MBP2331465.1	668	NA	NA	NA	NA	NA
JAGINY010000001.1	JAGINY010000001.1_JOF33_000128	89646	224953	JOF33_000165	202065	202646	MBP2331466.1	193	NA	NA	NA	NA	NA
JAGINY010000001.1	JAGINY010000001.1_JOF33_000128	89646	224953	JOF33_000166	202643	203704	MBP2331467.1	353	NA	NA	NA	NA	NA
JAGINY010000001.1	JAGINY010000001.1_JOF33_000128	89646	224953	JOF33_000167	204121	205155	MBP2331468.1	344	NA	NA	NA	NA	NA
JAGINY010000001.1	JAGINY010000001.1_JOF33_000128	89646	224953	JOF33_000168	205674	207743	MBP2331469.1	689	NA	NA	NA	NA	NA
JAGINY010000001.1	JAGINY010000001.1_JOF33_000128	89646	224953	JOF33_000169	207740	208303	MBP2331470.1	187	NA	NA	NA	NA	NA
JAGINY010000001.1	JAGINY010000001.1_JOF33_000128	89646	224953	JOF33_000170	208309	209229	MBP2331471.1	306	NA	NA	NA	NA	NA
JAGINY010000001.1	JAGINY010000001.1_JOF33_000128	89646	224953	JOF33_000171	209710	211545	MBP2331472.1	611	NA	NA	NA	NA	NA
JAGINY010000001.1	JAGINY010000001.1_JOF33_000128	89646	224953	JOF33_000172	211579	216546	MBP2331473.1	1655	NA	NA	NA	NA	NA
JAGINY010000001.1	JAGINY010000001.1_JOF33_000128	89646	224953	JOF33_000173	216552	218102	MBP2331474.1	516	NA	NA	NA	NA	NA
JAGINY010000001.1	JAGINY010000001.1_JOF33_000128	89646	224953	JOF33_000174	218231	218959	MBP2331475.1	242	NA	NA	NA	NA	NA
JAGINY010000001.1	JAGINY010000001.1_JOF33_000128	89646	224953	JOF33_000175	219070	220671	MBP2331476.1	533	NA	NA	NA	NA	NA
JAGINY010000001.1	JAGINY010000001.1_JOF33_000128	89646	224953	JOF33_000176	220786	221163	MBP2331477.1	125	NA	NA	NA	NA	NA
JAGINY010000001.1	JAGINY010000001.1_JOF33_000128	89646	224953	JOF33_000177	221205	222374	MBP2331478.1	389	NA	NA	NA	NA	NA
JAGINY010000001.1	JAGINY010000001.1_JOF33_000128	89646	224953	JOF33_000178	222371	224953	MBP2331479.1	860	NA	NA	NA	NA	NA
JAKJKU010000005.1	JAKJKU010000005.1_L3H44_10470	1	63329	L3H44_10305	1	193	MCF6774789.1	64	NA	NA	NA	NA	NA
JAKJKU010000005.1	JAKJKU010000005.1_L3H44_10470	1	63329	L3H44_10310	594	2090	MCF6774790.1	498	NA	NA	NA	NA	NA
JAKJKU010000005.1	JAKJKU010000005.1_L3H44_10470	1	63329	L3H44_10315	2090	3405	NA	438	NA	NA	NA	NA	NA
JAKJKU010000005.1	JAKJKU010000005.1_L3H44_10470	1	63329	L3H44_10320	3402	4244	MCF6774791.1	280	NA	NA	NA	NA	NA
JAKJKU010000005.1	JAKJKU010000005.1_L3H44_10470	1	63329	L3H44_10325	4258	5721	MCF6774792.1	487	NA	NA	NA	NA	NA
JAKJKU010000005.1	JAKJKU010000005.1_L3H44_10470	1	63329	L3H44_10330	5909	6091	MCF6774793.1	60	NA	NA	NA	NA	NA
JAKJKU010000005.1	JAKJKU010000005.1_L3H44_10470	1	63329	L3H44_10335	6195	7355	MCF6774794.1	386	NA	NA	NA	NA	NA
JAKJKU010000005.1	JAKJKU010000005.1_L3H44_10470	1	63329	L3H44_10345	8062	9048	MCF6774795.1	328	NA	NA	NA	NA	NA
JAKJKU010000005.1	JAKJKU010000005.1_L3H44_10470	1	63329	L3H44_10350	9359	9868	MCF6774796.1	169	NA	NA	NA	NA	NA
JAKJKU010000005.1	JAKJKU010000005.1_L3H44_10470	1	63329	L3H44_10355	9883	11592	MCF6774797.1	569	NA	Type-III-A_PP2C	NA	NA	NA
JAKJKU010000005.1	JAKJKU010000005.1_L3H44_10470	1	63329	L3H44_10360	11593	13050	MCF6774798.1	485	NA	NA	NA	NA	NA
JAKJKU010000005.1	JAKJKU010000005.1_L3H44_10470	1	63329	L3H44_10365	13047	14510	MCF6774799.1	487	NA	NA	NA	NA	NA
JAKJKU010000005.1	JAKJKU010000005.1_L3H44_10470	1	63329	L3H44_10370	14514	16400	MCF6774800.1	628	NA	PD-T4-6__PD-T4-6	NA	NA	NA
JAKJKU010000005.1	JAKJKU010000005.1_L3H44_10470	1	63329	L3H44_10375	16404	18548	MCF6774801.1	714	NA	PD-T4-6__PD-T4-6	NA	NA	NA
JAKJKU010000005.1	JAKJKU010000005.1_L3H44_10470	1	63329	L3H44_10380	18654	19322	MCF6774802.1	222	NA	NA	NA	NA	NA
JAKJKU010000005.1	JAKJKU010000005.1_L3H44_10470	1	63329	L3H44_10385	19395	20321	MCF6774803.1	308	NA	NA	NA	NA	NA
JAKJKU010000005.1	JAKJKU010000005.1_L3H44_10470	1	63329	L3H44_10390	20403	21365	NA	320	NA	NA	NA	NA	NA
JAKJKU010000005.1	JAKJKU010000005.1_L3H44_10470	1	63329	L3H44_10395	21704	23167	MCF6774804.1	487	NA	NA	NA	NA	NA
JAKJKU010000005.1	JAKJKU010000005.1_L3H44_10470	1	63329	L3H44_10400	23223	23912	MCF6774805.1	229	NA	NA	NA	NA	NA
JAKJKU010000005.1	JAKJKU010000005.1_L3H44_10470	1	63329	L3H44_10405	24167	27127	MCF6774806.1	986	NA	TIR-VIII__TIR-VIII_A	NA	NA	NA
JAKJKU010000005.1	JAKJKU010000005.1_L3H44_10470	1	63329	L3H44_10410	27154	27552	MCF6774807.1	132	NA	NA	NA	NA	NA
JAKJKU010000005.1	JAKJKU010000005.1_L3H44_10470	1	63329	L3H44_10415	27720	28592	MCF6774808.1	290	NA	NA	NA	NA	NA
JAKJKU010000005.1	JAKJKU010000005.1_L3H44_10470	1	63329	L3H44_10420	28597	29517	MCF6774809.1	306	NA	NA	NA	NA	NA
JAKJKU010000005.1	JAKJKU010000005.1_L3H44_10470	1	63329	L3H44_10425	29655	30398	MCF6774810.1	247	NA	NA	NA	NA	NA
JAKJKU010000005.1	JAKJKU010000005.1_L3H44_10470	1	63329	L3H44_10430	30437	32446	MCF6774811.1	669	NA	NA	NA	NA	NA
JAKJKU010000005.1	JAKJKU010000005.1_L3H44_10470	1	63329	L3H44_10435	32489	33475	MCF6774812.1	328	NA	NA	NA	NA	NA
JAKJKU010000005.1	JAKJKU010000005.1_L3H44_10470	1	63329	L3H44_10440	33964	34569	MCF6774813.1	201	NA	NA	NA	NA	NA
JAKJKU010000005.1	JAKJKU010000005.1_L3H44_10470	1	63329	L3H44_10445	34817	36052	MCF6774814.1	411	NA	NA	NA	NA	NA
JAKJKU010000005.1	JAKJKU010000005.1_L3H44_10470	1	63329	L3H44_10450	36029	36691	MCF6774815.1	220	NA	NA	NA	NA	NA
JAKJKU010000005.1	JAKJKU010000005.1_L3H44_10470	1	63329	L3H44_10455	36807	39806	MCF6774816.1	999	NA	NA	NA	NA	NA
JAKJKU010000005.1	JAKJKU010000005.1_L3H44_10470	1	63329	L3H44_10460	39799	41754	MCF6774817.1	651	NA	NA	NA	NA	NA
JAKJKU010000005.1	JAKJKU010000005.1_L3H44_10470	1	63329	L3H44_10465	41961	42587	MCF6774818.1	208	NA	NA	NA	NA	NA
JAKJKU010000005.1	JAKJKU010000005.1_L3H44_10470	1	63329	L3H44_10470	43090	43458	MCF6774819.1	122	NA	NA	NA	NA	NA
JAKJKU010000005.1	JAKJKU010000005.1_L3H44_10470	1	63329	L3H44_10475	43641	44261	MCF6774820.1	206	NA	NA	NA	NA	NA
JAKJKU010000005.1	JAKJKU010000005.1_L3H44_10470	1	63329	L3H44_10480	44287	45630	MCF6774821.1	447	NA	NA	NA	NA	NA
JAKJKU010000005.1	JAKJKU010000005.1_L3H44_10470	1	63329	L3H44_10485	45848	46813	MCF6774822.1	321	NA	NA	NA	NA	NA
JAKJKU010000005.1	JAKJKU010000005.1_L3H44_10470	1	63329	L3H44_10490	46826	46978	MCF6774823.1	50	NA	NA	NA	NA	NA
JAKJKU010000005.1	JAKJKU010000005.1_L3H44_10470	1	63329	L3H44_10495	47018	47638	MCF6774824.1	206	NA	NA	NA	NA	NA
JAKJKU010000005.1	JAKJKU010000005.1_L3H44_10470	1	63329	L3H44_10500	47817	48716	MCF6774825.1	299	NA	NA	NA	NA	NA
JAKJKU010000005.1	JAKJKU010000005.1_L3H44_10470	1	63329	L3H44_10505	48959	49204	MCF6774826.1	81	NA	NA	NA	NA	NA
JAKJKU010000005.1	JAKJKU010000005.1_L3H44_10470	1	63329	L3H44_10510	49201	50118	MCF6774827.1	305	NA	NA	NA	NA	NA
JAKJKU010000005.1	JAKJKU010000005.1_L3H44_10470	1	63329	L3H44_10515	50302	51384	MCF6774828.1	360	NA	NA	NA	NA	NA
JAKJKU010000005.1	JAKJKU010000005.1_L3H44_10470	1	63329	L3H44_10520	51437	53707	MCF6774829.1	756	NA	NA	NA	NA	NA
JAKJKU010000005.1	JAKJKU010000005.1_L3H44_10470	1	63329	L3H44_10525	53716	54483	MCF6774830.1	255	NA	NA	NA	NA	NA
JAKJKU010000005.1	JAKJKU010000005.1_L3H44_10470	1	63329	L3H44_10530	54480	57098	MCF6774831.1	872	NA	NA	NA	NA	NA
JAKJKU010000005.1	JAKJKU010000005.1_L3H44_10470	1	63329	L3H44_10535	57140	58816	MCF6774832.1	558	NA	NA	NA	NA	NA
JAKJKU010000005.1	JAKJKU010000005.1_L3H44_10470	1	63329	L3H44_10540	58930	60024	MCF6774833.1	364	NA	NA	NA	NA	NA
JAKJKU010000005.1	JAKJKU010000005.1_L3H44_10470	1	63329	L3H44_10545	60017	60943	MCF6774834.1	308	NA	NA	NA	NA	NA
JAKJKU010000005.1	JAKJKU010000005.1_L3H44_10470	1	63329	L3H44_10550	60980	62611	MCF6774835.1	543	NA	NA	NA	NA	NA
JAKJKU010000005.1	JAKJKU010000005.1_L3H44_10470	1	63329	L3H44_10555	62901	63329	MCF6774836.1	142	NA	NA	NA	NA	NA
JAKMUZ010000021.1	JAKMUZ010000021.1_L8V22_10275	21	46117	L8V22_10100	21	1034	MCZ9296894.1	337	NA	NA	NA	NA	NA
JAKMUZ010000021.1	JAKMUZ010000021.1_L8V22_10275	21	46117	L8V22_10105	1174	2868	MCZ9296895.1	564	NA	NA	NA	NA	NA
JAKMUZ010000021.1	JAKMUZ010000021.1_L8V22_10275	21	46117	L8V22_10110	2922	3902	MCZ9296896.1	326	NA	NA	NA	NA	NA
JAKMUZ010000021.1	JAKMUZ010000021.1_L8V22_10275	21	46117	L8V22_10115	3895	4410	MCZ9296897.1	171	NA	NA	NA	NA	NA
JAKMUZ010000021.1	JAKMUZ010000021.1_L8V22_10275	21	46117	L8V22_10120	4400	6352	MCZ9296898.1	650	NA	NA	NA	NA	NA
JAKMUZ010000021.1	JAKMUZ010000021.1_L8V22_10275	21	46117	L8V22_10125	6459	7721	MCZ9296899.1	420	NA	NA	NA	NA	NA
JAKMUZ010000021.1	JAKMUZ010000021.1_L8V22_10275	21	46117	L8V22_10130	7718	8305	MCZ9296900.1	195	NA	NA	NA	NA	NA
JAKMUZ010000021.1	JAKMUZ010000021.1_L8V22_10275	21	46117	L8V22_10135	8371	8571	MCZ9296901.1	66	NA	NA	NA	NA	NA
JAKMUZ010000021.1	JAKMUZ010000021.1_L8V22_10275	21	46117	L8V22_10140	8612	9808	MCZ9296902.1	398	NA	NA	NA	NA	NA
JAKMUZ010000021.1	JAKMUZ010000021.1_L8V22_10275	21	46117	L8V22_10145	9955	11853	MCZ9296903.1	632	NA	NA	NA	NA	NA
JAKMUZ010000021.1	JAKMUZ010000021.1_L8V22_10275	21	46117	L8V22_10150	11850	12680	MCZ9296904.1	276	NA	NA	NA	NA	NA
JAKMUZ010000021.1	JAKMUZ010000021.1_L8V22_10275	21	46117	L8V22_10155	12703	14250	MCZ9296905.1	515	NA	NA	NA	NA	NA
JAKMUZ010000021.1	JAKMUZ010000021.1_L8V22_10275	21	46117	L8V22_10160	14279	15016	MCZ9296906.1	245	NA	NA	NA	NA	NA
JAKMUZ010000021.1	JAKMUZ010000021.1_L8V22_10275	21	46117	L8V22_10165	15020	16744	MCZ9296907.1	574	NA	NA	NA	NA	NA
JAKMUZ010000021.1	JAKMUZ010000021.1_L8V22_10275	21	46117	L8V22_10170	17043	18578	MCZ9296908.1	511	NA	NA	NA	NA	NA
JAKMUZ010000021.1	JAKMUZ010000021.1_L8V22_10275	21	46117	L8V22_10175	18680	19936	MCZ9296909.1	418	NA	NA	NA	NA	NA
JAKMUZ010000021.1	JAKMUZ010000021.1_L8V22_10275	21	46117	L8V22_10180	20002	20751	MCZ9296910.1	249	NA	AbiEii__AbiEi_4	NA	NA	NA
JAKMUZ010000021.1	JAKMUZ010000021.1_L8V22_10275	21	46117	L8V22_10185	20788	21861	MCZ9296911.1	357	NA	NA	NA	NA	NA
JAKMUZ010000021.1	JAKMUZ010000021.1_L8V22_10275	21	46117	L8V22_10190	21861	22208	MCZ9296912.1	115	NA	NA	NA	NA	NA
JAKMUZ010000021.1	JAKMUZ010000021.1_L8V22_10275	21	46117	L8V22_10195	22205	22858	MCZ9296913.1	217	NA	NA	NA	NA	NA
JAKMUZ010000021.1	JAKMUZ010000021.1_L8V22_10275	21	46117	L8V22_10200	22868	23764	MCZ9296914.1	298	NA	NA	NA	NA	NA
JAKMUZ010000021.1	JAKMUZ010000021.1_L8V22_10275	21	46117	L8V22_10205	23798	24934	MCZ9296915.1	378	NA	NA	NA	NA	NA
JAKMUZ010000021.1	JAKMUZ010000021.1_L8V22_10275	21	46117	L8V22_10210	24931	25629	MCZ9296916.1	232	NA	NA	NA	NA	NA
JAKMUZ010000021.1	JAKMUZ010000021.1_L8V22_10275	21	46117	L8V22_10215	25693	26937	MCZ9296917.1	414	NA	NA	NA	NA	NA
JAKMUZ010000021.1	JAKMUZ010000021.1_L8V22_10275	21	46117	L8V22_10220	26986	27906	MCZ9296918.1	306	NA	NA	NA	NA	NA
JAKMUZ010000021.1	JAKMUZ010000021.1_L8V22_10275	21	46117	L8V22_10225	27927	28631	MCZ9296919.1	234	NA	NA	NA	NA	NA
JAKMUZ010000021.1	JAKMUZ010000021.1_L8V22_10275	21	46117	L8V22_10230	28631	29578	MCZ9296920.1	315	NA	NA	NA	NA	NA
JAKMUZ010000021.1	JAKMUZ010000021.1_L8V22_10275	21	46117	L8V22_10235	29666	31408	MCZ9296921.1	580	NA	NA	NA	NA	NA
JAKMUZ010000021.1	JAKMUZ010000021.1_L8V22_10275	21	46117	L8V22_10240	31405	32052	MCZ9296922.1	215	NA	NA	NA	NA	NA
JAKMUZ010000021.1	JAKMUZ010000021.1_L8V22_10275	21	46117	L8V22_10245	32217	32819	MCZ9296923.1	200	NA	NA	NA	NA	NA
[truncated: 11,417 more rows]
