# Supplementary material
Source: Research Square preprint supplement (doi:10.21203/rs.3.rs-9446490/v1)
Supplement: Supplementary file 2 [file 5f745f84224e358b68cbf86f.xlsx]

## Sheet: bacterial_phage_lsr2_genomes_fi
Table S8 | Genome sequences encoding Lsr2 homologues included in phylogenetic analysis. For each candidate, the table lists the genome ID, locus tag and protein accession of the Lsr2 homologue, source organism, genome or contig length, and strain designation. These sequences were used to construct the phylogenetic tree shown in Supplementary Figure 6.
genome_id	lrs2_locus_tag	lsr2_protein_id	db_source	genome_length_bp	strain_name
NC_003450	CGL_RS08730	WP_011014593.1	RefSeq	3309401	Corynebacterium glutamicum ATCC 13032, complete sequence
NC_006958	CGTRNA_RS08740	WP_011014593.1	RefSeq	3282708	Corynebacterium glutamicum ATCC 13032, complete sequence
NC_020519	WA5_RS08710	WP_011014593.1	RefSeq	3309400	Corynebacterium glutamicum K051, complete sequence
NZ_AP017369	N24_RS09370	WP_096456367.1	RefSeq	3537507	Corynebacterium suranareeae strain N24 chromosome
NZ_CP020658	B7P23_RS04135	WP_011014593.1	RefSeq	3306634	Corynebacterium glutamicum strain TQ2223 chromosome, complete genome
NZ_CP047200	CDUR_RS12410	WP_040358883.1	RefSeq	2786863	Corynebacterium durum strain DSM 45333 chromosome, complete genome
NZ_CP115148	O5J82_RS08730	WP_011014593.1	RefSeq	3282349	Corynebacterium glutamicum strain ATCC 13032 chromosome, complete genome
NZ_CP199749	ACTRLV_RS12200	WP_040358883.1	RefSeq	2747552	Corynebacterium durum strain JJ1 chromosome
NZ_JAAOYZ010000001	FHU42_RS15255	WP_011014593.1	RefSeq	3309796	Corynebacterium glutamicum strain ATCC 13287 Ga0374125_01, whole genome shotgun sequence
NZ_JACENH010000001	H2C41_RS03130	WP_011014593.1	RefSeq	711541	Corynebacterium glutamicum strain 116 Scaffolds_1_711541, whole genome shotgun sequence
NZ_JACENI010000007	H2C42_RS08260	WP_011014593.1	RefSeq	121465	Corynebacterium glutamicum strain 53 Scaffolds_7_121465, whole genome shotgun sequence
NZ_JACENJ010000009	H2J98_RS08655	WP_011014593.1	RefSeq	118876	Corynebacterium glutamicum strain 52 Scaffolds_9_118876, whole genome shotgun sequence
NZ_JACENK010000002	H2C40_RS01985	WP_011014593.1	RefSeq	273705	Corynebacterium glutamicum strain 51 Scaffolds_2_273705, whole genome shotgun sequence
NZ_JACENL010000006	H2C44_RS05785	WP_011014593.1	RefSeq	170036	Corynebacterium glutamicum strain 50 Scaffolds_6_170036, whole genome shotgun sequence
NZ_JACENM010000002	H2C38_RS02405	WP_011014593.1	RefSeq	459996	Corynebacterium glutamicum strain 115 Scaffolds_2_459996, whole genome shotgun sequence
NZ_JACENN010000008	H2C39_RS07680	WP_011014593.1	RefSeq	119712	Corynebacterium glutamicum strain 38 Scaffolds_8_119712, whole genome shotgun sequence
NZ_JACENO010000008	H2C56_RS07585	WP_011014593.1	RefSeq	121464	Corynebacterium glutamicum strain 37 Scaffolds_8_121464, whole genome shotgun sequence
NZ_JACENQ010000008	H2C43_RS08180	WP_011014593.1	RefSeq	118879	Corynebacterium glutamicum strain 35 Scaffolds_8_118879, whole genome shotgun sequence
NZ_JACEQW010000008	H2N52_RS07565	WP_011014593.1	RefSeq	121734	Corynebacterium glutamicum strain 39 Scaffolds_8_121734, whole genome shotgun sequence
NZ_JADDRO010000003	IC236_RS04150	WP_011014593.1	RefSeq	274059	Corynebacterium glutamicum strain LEGU1 contig3, whole genome shotgun sequence
NZ_JAFLEQ010000018	JZY06_RS12000	WP_207279811.1	RefSeq	55966	Corynebacterium mendelii strain CCM 8862 GCM70011437_18, whole genome shotgun sequence
NZ_JBHUKW010000008	ACFSSC_RS11760	WP_207279811.1	RefSeq	55775	Corynebacterium mendelii strain CCM 8862 GCM70020007_3, whole genome shotgun sequence
NZ_JBQSWR010000017	ACT3SZ_RS16290	WP_444620387.1	RefSeq	11356	Corynebacterium sp. AOP40-9SA-29 AOP40-9SA-29_17, whole genome shotgun sequence
NZ_JACENP010000010	H2C54_RS08540	WP_011014593.1	RefSeq	121463	Corynebacterium glutamicum strain 36 Scaffolds_10_121463, whole genome shotgun sequence
DWUR01000158	H9907_09105	HJD50225.1	GenBank	8737	MAG TPA_asm: Candidatus Corynebacterium intestinavium isolate 5925 CHK44__C223722_L8737_SAMEA104467233, whole genome shotgun sequence
DWVP01000009	H9751_04065	HJC84716.1	GenBank	143235	MAG TPA_asm: Candidatus Corynebacterium faecigallinarum isolate ChiHjej13B12-4958 ChiHjej13B12M5__C140736_L143235_SAMN08009879, whole genome shotgun sequence
DXFZ01000085	H9867_06820	HIW96177.1	GenBank	10969	MAG TPA_asm: Candidatus Corynebacterium gallistercoris isolate 4376 ChiHile6__C131192_L10969_SAMN08009807, whole genome shotgun sequence
DXGC01000117	H9870_13445	HIW92651.1	GenBank	48814	MAG TPA_asm: Candidatus Corynebacterium avicola isolate CHK32-1732 CHK32__C305737_L48814_SAMEA104467200, whole genome shotgun sequence
JAAYSN010000027	GX356_01305	NLP38349.1	GenBank	9711	MAG: Corynebacterium pollutisoli isolate AS23ysBPME_344 10000_AS23, whole genome shotgun sequence
JAAYYP010000470	GX570_12740	NLF92189.1	GenBank	8755	MAG: Corynebacterium marinum isolate AS06rmzACSIP_235 679235_AS06, whole genome shotgun sequence
JAAZHI010000111	GX859_05110	NLA55666.1	GenBank	24445	MAG: Corynebacterium humireducens isolate AS15tlH2ME_198 84449_AS15, whole genome shotgun sequence
JADKMY010000003	IRY30_09745	MBF4554352.1	GenBank	315509	Corynebacterium suicordis DSM 45110 Scaffold3_1, whole genome shotgun sequence
JADQUG010000016	I4J41_05330	MBG9354045.1	GenBank	44065	Corynebacterium belfantii strain 04-17 NODE_16_length_44065_cov_36.287177, whole genome shotgun sequence
JAEIOT010000011	JDV76_09345	MBI9001165.1	GenBank	245211	Corynebacterium marambiense strain CCM 8864 GCM70020042_11, whole genome shotgun sequence
JAENIP010000007	JIM95_01240	MBK1843202.1	GenBank	357193	Corynebacterium sp. CCM 8835 Contig_7_189.003, whole genome shotgun sequence
JAGINY010000001	JOF33_000128	MBP2331429.1	GenBank	2881812	Corynebacterium freneyi strain DSM 44506 Ga0451115_01, whole genome shotgun sequence
JAKJKU010000005	L3H44_10470	MCF6774819.1	GenBank	63487	Corynebacterium parakroppenstedtii strain MC-12 NODE_5_length_63487_cov_245.834474, whole genome shotgun sequence
JAKMUZ010000021	L8V22_10275	MCZ9296929.1	GenBank	46458	Corynebacterium yonathiae strain c21Ua_68 21Ua_68_A_contig_21, whole genome shotgun sequence
JAMKFF010000005	M5J06_06925	MCL8493862.1	GenBank	173124	Corynebacterium intestinale strain B5-R-101 contig5, whole genome shotgun sequence
JANWTC010000024	NYP18_14820	MCS5480915.1	GenBank	21195	Corynebacterium lemuris strain YIM 101645 contig_22_length_21195_cov_262.314090, whole genome shotgun sequence
JAUKFM010000009	Q0N36_11295	MDN8621152.1	GenBank	153814	Corynebacterium kefirresidentii strain P7_F1 9c, whole genome shotgun sequence
JAVDYF010000001	J2S37_000669	MDR7354131.1	GenBank	3236053	Corynebacterium felinum strain DSM 44508 Ga0480138_01, whole genome shotgun sequence
JAYWMA010000012	VVR64_09865	MEX3529360.1	GenBank	71963	Corynebacterium xerosis strain LK2569 12, whole genome shotgun sequence
JBAHUZ010000041	V5S76_10935	MEJ4139615.1	GenBank	8115	Corynebacterium marquesiae strain PCR27 NODE_41_length_8115_cov_68.947002, whole genome shotgun sequence
JBAHVJ010000009	V5S96_09195	MEJ4100526.1	GenBank	130235	Corynebacterium mastitidis strain PCRF NODE_9_length_130235_cov_67.935640, whole genome shotgun sequence
JBAHVJ010000012	V5S96_10630	MEJ4100805.1	GenBank	71259	Corynebacterium mastitidis strain PCRF NODE_12_length_71259_cov_67.855483, whole genome shotgun sequence
JBBMGJ010000035	WMQ01_11040	MEK0146588.1	GenBank	8124	Corynebacterium yonathiae strain KPL2619 NODE_35_length_8124_cov_56.108736_pilon, whole genome shotgun sequence
JBHRZN010000003	ACFORJ_10910	MFC3850672.1	GenBank	439213	Corynebacterium hansenii strain CCUG 53252 spades_K_17_127_3, whole genome shotgun sequence
JBHSQE010000005	ACFPUZ_07590	MFC6146665.1	GenBank	158551	Corynebacterium nasicanis strain CCUG 65455 platanus_K_17_124_5, whole genome shotgun sequence
PKHR02000018	CYJ44_009525	MEM5986400.1	GenBank	174910	Corynebacterium hesseae strain UMB0043 NODE_5_length_174910_cov_95.018375, whole genome shotgun sequence
NZ_JBLWZQ010000023	ACN0T4_RS12905	WP_014011300.1	RefSeq	43728	MAG: Corynebacterium variabile isolate EC03-01 C03maxbin.001RE.5K@23, whole genome shotgun sequence
NC_010545	CU_RS00615	WP_012359384.1	RefSeq	2369219	Corynebacterium urealyticum DSM 7109, complete sequence
NZ_EQ973330	CORMATOL_RS08625	WP_005522018.1	RefSeq	528914	Corynebacterium matruchotii ATCC 33806 Scfld2, whole genome shotgun sequence
NZ_AENJ01000334	CBOV_RS0109215	WP_029158004.1	RefSeq	15396	Corynebacterium bovis DSM 20582 = CIP 54.80 strain DSM 20582 contig00336, whole genome shotgun sequence
NC_015859	CVAR_RS14670	WP_014011300.1	RefSeq	3433007	Corynebacterium variabile DSM 44702, complete sequence
NC_015859	CVAR_RS14905	WP_014011300.1	RefSeq	3433007	Corynebacterium variabile DSM 44702, complete sequence
NZ_HF541867	BN46_RS07410	WP_004601358.1	RefSeq	448435	Corynebacterium otitidis ATCC 51513, whole genome shotgun sequence
NC_020302	A605_RS13550	WP_015402078.1	RefSeq	3135752	Corynebacterium halotolerans YIM 70093 = DSM 44683, complete sequence
NZ_AQUX01000005	A3E9_RS0107585	WP_018022005.1	RefSeq	169049	Corynebacterium doosanense CAU 212 = DSM 45436 A3E9DRAFT_scaffold_4.5_C, whole genome shotgun sequence
NC_021663	A606_RS00845	WP_020440184.1	RefSeq	2751233	Corynebacterium terpenotabidum Y-11, complete sequence
NC_021915	B841_RS12385	WP_020936490.1	RefSeq	2787574	Corynebacterium maris DSM 45190, complete sequence
NC_021920	B841_RS13015	WP_020935833.1	RefSeq	45973	Corynebacterium maris DSM 45190 plasmid pCmaris1, complete sequence
NZ_JRNE01000023	HMPREF1650_RS01785	WP_035120234.1	RefSeq	37303	Corynebacterium freneyi DNF00450 contig23, whole genome shotgun sequence
NZ_CP006842	CGLY_RS15515	WP_038550531.1	RefSeq	3509786	Corynebacterium glyciniphilum AJ 3170 chromosome, complete genome
NZ_CP006842	CGLY_RS15820	WP_038550599.1	RefSeq	3509786	Corynebacterium glyciniphilum AJ 3170 chromosome, complete genome
NZ_CP004353	B843_RS12530	WP_025253836.1	RefSeq	2931780	Corynebacterium vitaeruminis DSM 20294 chromosome, complete genome
NZ_CP010827	CSING_RS12310	WP_042532733.1	RefSeq	2830519	Corynebacterium singulare strain IBS B52218 chromosome, complete genome
NZ_CP007790	B840_RS11665	WP_042622273.1	RefSeq	2607268	Corynebacterium marinum DSM 44953 chromosome, complete genome
NZ_CP007792	B840_RS12415	WP_042622795.1	RefSeq	96094	Corynebacterium marinum DSM 44953 plasmid pCmarinum1, complete sequence
NZ_CP011311	UL81_RS10770	WP_035106272.1	RefSeq	2451810	Corynebacterium camporealensis strain DSM 44610 chromosome, complete genome
NZ_CP011541	CEPID_RS11445	WP_047241069.1	RefSeq	2692072	Corynebacterium epidermidicanis strain DSM 45586 chromosome, complete genome
NZ_CP011545	CTEST_RS06760	WP_047254283.1	RefSeq	2721226	Corynebacterium testudinoris strain DSM 44614 chromosome, complete genome
NZ_CP011545	CTEST_RS12455	WP_047254008.1	RefSeq	2721226	Corynebacterium testudinoris strain DSM 44614 chromosome, complete genome
NZ_CP011546	CUTER_RS10505	WP_047260377.1	RefSeq	2419437	Corynebacterium uterequi strain DSM 45634 chromosome, complete genome
NZ_CP011542	CMUST_RS14590	WP_047263123.1	RefSeq	3391554	Corynebacterium mustelae strain DSM 45274 chromosome, complete genome
NZ_LDYE01000009	Crcip5296_RS08205	WP_048381145.1	RefSeq	120859	Corynebacterium renale strain CIP 52.96 contig_9, whole genome shotgun sequence
NZ_JUMN01000022	ADI95_RS01880	WP_049154631.1	RefSeq	10494	Corynebacterium aurimucosum strain 945_CAUR 117_10494_171623, whole genome shotgun sequence
NZ_CP006841	CLAC_RS11860	WP_053413089.1	RefSeq	2769745	Corynebacterium lactis RW2-5 chromosome, complete genome
NZ_LKST01000002	Cocul_RS04095	WP_055122059.1	RefSeq	721185	Corynebacterium oculi strain NML 130210 Cocul_contig000002, whole genome shotgun sequence
NZ_LKST01000004	Cocul_RS11425	WP_055123403.1	RefSeq	392289	Corynebacterium oculi strain NML 130210 Cocul_contig000004, whole genome shotgun sequence
NZ_LKEV01000009	Clow_RS10805	WP_055179111.1	RefSeq	72279	Corynebacterium lowii strain NML 130206 Clow_contig000009, whole genome shotgun sequence
NZ_BCSU01000013	CHU01S_RS08635	WP_040086997.1	RefSeq	46182	Corynebacterium humireducens NBRC 106098 = DSM 45392 strain NBRC 106098, whole genome shotgun sequence
NZ_LT160593	BN3906_RS06605	WP_066586336.1	RefSeq	1519244	Corynebacterium provencense strain SN15, whole genome shotgun sequence
NZ_LT596207	BN9444_RS01475	WP_068801305.1	RefSeq	878083	Corynebacterium phoceense strain MC1, whole genome shotgun sequence
NZ_CP009248	CSPHI_RS11540	WP_075693457.1	RefSeq	2594799	Corynebacterium sphenisci DSM 44792 chromosome, complete genome
NZ_CP009245	CAQU_RS11930	WP_075728041.1	RefSeq	2926437	Corynebacterium aquilae DSM 44791 strain S-613 chromosome, complete genome
NZ_CP009249	CPHO_RS11850	WP_075736043.1	RefSeq	2779609	Corynebacterium phocae strain M408/89/1 chromosome, complete genome
NZ_FXAR01000003	B9Y70_RS05060	WP_085549180.1	RefSeq	275142	Corynebacterium pollutisoli strain VDS11, whole genome shotgun sequence
NZ_NDHS01000007	B1A54_RS08300	WP_014302564.1	RefSeq	147745	Corynebacterium diphtheriae strain c319 c319_contig000007, whole genome shotgun sequence
NZ_LSYN01000048	AY547_RS09735	WP_014302564.1	RefSeq	8652	Corynebacterium diphtheriae bv. gravis strain 209 contig_52, whole genome shotgun sequence
NZ_LSZF01000025	AY602_RS07190	WP_010935715.1	RefSeq	179536	Corynebacterium diphtheriae bv. mitis strain 1438 contig_7, whole genome shotgun sequence
NZ_FOPJ01000015	BMZ01_RS09645	WP_092286852.1	RefSeq	66744	Corynebacterium spheniscorum strain J11, PG 39, whole genome shotgun sequence
NZ_PJAF01000036	CXB45_RS09910	WP_018117763.1	RefSeq	19697	Corynebacterium mastitidis strain 16-1433 36, whole genome shotgun sequence
NZ_PNHF01000015	CJ204_RS07210	WP_102212974.1	RefSeq	76354	Corynebacterium xerosis strain UMB0908 ERR1203674.17957_1_86.15, whole genome shotgun sequence
NZ_PNHI01000014	CJ201_RS10355	WP_070517764.1	RefSeq	60436	Corynebacterium aurimucosum strain UMB1300 ERR1203643.17957_1_55.14, whole genome shotgun sequence
NZ_LS483460	DQN65_RS00750	WP_039672644.1	RefSeq	2695970	Corynebacterium minutissimum strain NCTC10288 chromosome 1, complete sequence
NZ_QHCV01000105	DLJ54_RS08705	WP_113631328.1	RefSeq	6659	Corynebacterium heidelbergense strain 647 NODE_105_length_6659_cov_42.0912_ID_3916, whole genome shotgun sequence
NZ_UFXR01000001	DYC58_RS07145	WP_013912582.1	RefSeq	2520890	Corynebacterium ulcerans strain NCTC8666, whole genome shotgun sequence
NZ_CP032788	D4R08_RS09405	WP_120983627.1	RefSeq	2738835	Corynebacterium xerosis strain GS 1 chromosome, complete genome
NZ_PTJO01000001	C5L39_RS01320	WP_123047082.1	RefSeq	308615	Corynebacterium alimapuense strain VA37-3 69366_contig_0000001, whole genome shotgun sequence
NZ_PQNX01000005	CXF46_RS08245	WP_029158004.1	RefSeq	202707	Corynebacterium bovis strain 4826 5, whole genome shotgun sequence
NZ_RXHJ01000004	EAH68_RS03975	WP_126120031.1	RefSeq	186500	Corynebacterium hylobatis strain YIM 101343 Scaffold2_2, whole genome shotgun sequence
NZ_CP039247	CENDO_RS10645	WP_136141993.1	RefSeq	2477061	Corynebacterium endometrii strain LMM-1653 chromosome, complete genome
NZ_VDHJ01000019	FHE74_RS10185	WP_139466407.1	RefSeq	20060	Corynebacterium tapiri strain LMG 28165 Scaffold16_1, whole genome shotgun sequence
NZ_VYVF01000011	F6I42_RS05780	WP_069359719.1	RefSeq	65252	Corynebacterium amycolatum strain UMB9184 NODE_11_length_65252_cov_12.152353, whole genome shotgun sequence
NZ_WBMK01000021	F8196_RS10740	WP_005522018.1	RefSeq	42191	Corynebacterium matruchotii strain ATCC 14265 C_matruchotii_ATCC_14265_Contig_21, whole genome shotgun sequence
NZ_CP045032	CUROG_RS00835	WP_151902056.1	RefSeq	2351892	Corynebacterium urogenitale strain LMM-1652 chromosome, complete genome
NZ_VYWH01000011	F6I11_RS06645	WP_016421684.1	RefSeq	89920	Corynebacterium amycolatum strain UMB1182 NODE_11_length_89920_cov_19.426915, whole genome shotgun sequence
NZ_CP046322	FOB82_RS05135	WP_155868506.1	RefSeq	2816211	Corynebacterium xerosis strain FDAARGOS_674 chromosome, complete genome
NZ_CP046322	FOB82_RS10975	WP_155870354.1	RefSeq	2816211	Corynebacterium xerosis strain FDAARGOS_674 chromosome, complete genome
NZ_CP046452	CKALI_RS11445	WP_156193472.1	RefSeq	2510218	Corynebacterium kalinowskii strain 1959 chromosome, complete genome
NZ_CP046453	CETAM_RS00485	WP_156226583.1	RefSeq	2803752	Corynebacterium comes strain 2019 chromosome, complete genome
NZ_CP046453	CETAM_RS12555	WP_156229163.1	RefSeq	2803752	Corynebacterium comes strain 2019 chromosome, complete genome
NZ_CP046454	CETAM_RS13385	WP_156229548.1	RefSeq	83516	Corynebacterium comes strain 2019 plasmid pCETAM, complete sequence
NZ_CP046455	COCCU_RS13285	WP_156232202.1	RefSeq	3109186	Corynebacterium occultum strain 2039 chromosome, complete genome
NZ_VMTX01000006	FQN05_RS05385	WP_158381404.1	RefSeq	157770	Corynebacterium aurimucosum strain 15-4290 NODE_6_length_157770_cov_150.205, whole genome shotgun sequence
NC_017301	CPC231_RS10090	WP_013242863.1	RefSeq	2337250	Corynebacterium pseudotuberculosis C231, complete sequence
NZ_CP059833	HW450_RS06870	WP_182384919.1	RefSeq	2680694	Corynebacterium hindlerae strain NML 93-0612 chromosome
NZ_CP046883	GP473_RS00480	WP_185769666.1	RefSeq	2208656	Corynebacterium anserum strain 23H37-10 chromosome, complete genome
NZ_CP046884	GP475_RS11925	WP_187974571.1	RefSeq	2617997	Corynebacterium poyangense strain 4H37-19 chromosome, complete genome
NZ_CP068292	GWO70_RS11130	WP_121912174.1	RefSeq	2431961	Corynebacterium macginleyi strain 160811 chromosome, complete genome
NZ_JAKGSI010000004	L1O03_RS09435	WP_236119522.1	RefSeq	391163	Corynebacterium uropygiale strain JCM 32435 Scaffold4, whole genome shotgun sequence
NZ_JALIEA010000004	MUN33_RS00090	WP_244802875.1	RefSeq	9853	Corynebacterium kalidii strain LD5P10 113, whole genome shotgun sequence
NZ_JALIEA010000010	MUN33_RS02330	WP_244803302.1	RefSeq	200781	Corynebacterium kalidii strain LD5P10 121, whole genome shotgun sequence
NZ_JALNJB010000004	M0E78_RS09650	WP_248113816.1	RefSeq	373004	Corynebacterium antarcticum strain P6145 4, whole genome shotgun sequence
NZ_JAEUWV010000024	JMN37_RS10430	WP_252932114.1	RefSeq	25688	Corynebacterium lipophilum strain MC-18 Scaffold24, whole genome shotgun sequence
NZ_JAGPYX010000005	KBX29_RS05655	WP_070361746.1	RefSeq	165969	Corynebacterium pseudogenitalium strain CCUG 18816 NODE_5_length_165969_cov_307.868824, whole genome shotgun sequence
NZ_JAKMUT010000009	L8V00_RS09145	WP_070488437.1	RefSeq	75011	Corynebacterium evansiae strain c8Ua_174 8Ua_174_A_contig_9, whole genome shotgun sequence
NZ_JAKMUV010000011	L8U58_RS08385	WP_034968386.1	RefSeq	69735	Corynebacterium macclintockiae strain c9Ua_112 9Ua_112_A_contig_11, whole genome shotgun sequence
NZ_JAKMUS010000019	L8U60_RS09755	WP_269966182.1	RefSeq	41085	Corynebacterium meitnerae strain c8Ua_172 8Ua_172_A_contig_19, whole genome shotgun sequence
NZ_CP063191	CHEID_RS00530	WP_112770197.1	RefSeq	2313070	Corynebacterium heidelbergense strain DSM 104638 chromosome, complete genome
NZ_CP046976	CAPP_RS10660	WP_076599456.1	RefSeq	2284440	Corynebacterium appendicis CIP 107643 chromosome, complete genome
NZ_CP047046	CAURIC_RS00805	WP_035115974.1	RefSeq	2599172	Corynebacterium auriscanis strain DSM 44609 chromosome, complete genome
NZ_JARUHM010000015	P8T80_RS11640	WP_155874377.1	RefSeq	143444	Corynebacterium rouxii strain 70862 NODE_8_length_143444_cov_25.417864, whole genome shotgun sequence
NZ_JAVBIH010000005	RAE08_RS04595	WP_005325354.1	RefSeq	135567	Corynebacterium tuberculostearicum strain CTNIH17 NODE_5_length_135567_cov_22.452793_pilon, whole genome shotgun sequence
NZ_JAVBIB010000015	RAE03_RS09165	WP_316993670.1	RefSeq	70115	Corynebacterium tuberculostearicum strain CTNIH22 NODE_15_length_70115_cov_21.603909_pilon, whole genome shotgun sequence
NZ_JBAHVF010000014	V5S77_RS10190	WP_005279679.1	RefSeq	47138	Corynebacterium accolens strain PCR31 NODE_14_length_47138_cov_66.632881, whole genome shotgun sequence
NZ_JBIPJZ010000002	ACHFB7_RS00595	WP_070644472.1	RefSeq	71545	Corynebacterium aurimucosum strain UMB9212 NODE_11_length_71545_cov_138.772318, whole genome shotgun sequence
NZ_JBKGEB010000012	ACLEFB_RS06260	WP_005510529.1	RefSeq	216026	Corynebacterium amycolatum strain UMB9865 NODE_4_length_216026_cov_68.755961, whole genome shotgun sequence
NZ_CBCRUA010000011	ACM9IR_RS06865	WP_025401821.1	RefSeq	77552	Corynebacterium falsenii strain CIP105466T isolate CIP105466T NODE_0011, whole genome shotgun sequence
NC_002935	DIP_RS22445	WP_010935715.1	RefSeq	2488635	Corynebacterium diphtheriae NCTC 13129, complete sequence
NC_007164	JK_RS00550	WP_011272853.1	RefSeq	2462499	Corynebacterium jeikeium K411, complete sequence
NZ_ACLH01000042	RH39_RS04555	WP_010188467.1	RefSeq	25084	Corynebacterium aurimucosum ATCC 700975 contig00104, whole genome shotgun sequence
NC_012704	CKROP_RS00540	WP_012730789.1	RefSeq	2446804	Corynebacterium kroppenstedtii DSM 44385, complete sequence
NZ_GL542878	HMPREF0305_RS09420	WP_005325354.1	RefSeq	218428	Corynebacterium pseudogenitalium ATCC 33035 SCAFFOLD5, whole genome shotgun sequence
NC_015673	CRES_RS02615	WP_013887892.1	RefSeq	2601311	Corynebacterium resistens DSM 45100, complete sequence
NC_022198	CARG_RS09135	WP_021012366.1	RefSeq	2031902	Corynebacterium argentoratense DSM 44202, complete sequence
NZ_CP033896	CCHOA_RS00370	WP_164472325.1	RefSeq	2986773	Corynebacterium choanae strain 200CH chromosome, complete genome
NZ_VOHM01000029	FRX94_RS11060	WP_027012861.1	RefSeq	30509	Corynebacterium canis strain CCUG 58627 Scaffold29, whole genome shotgun sequence
NZ_JAEIOS010000015	JDV75_RS10195	WP_198739143.1	RefSeq	407517	Corynebacterium meridianum strain CCM 8863 GCM70020041_18, whole genome shotgun sequence
NZ_JAENIQ020000007	JIM94_RS11010	WP_200253300.1	RefSeq	66870	Corynebacterium pygosceleis strain CCM 8836 7, whole genome shotgun sequence
NZ_CAKZHK010000004	Q7P45_RS01420	WP_303735264.1	RefSeq	82388	MAG: Corynebacterium kroppenstedtii isolate SRR2005651_bin.5_CONCOCT_v1.1_MAG ERZ782904.26, whole genome shotgun sequence
NZ_CP137757	Q0N40_RS00500	WP_012730789.1	RefSeq	2512499	Corynebacterium pseudokroppenstedtii strain P15_C1 chromosome, complete genome
ACVP01000005	CORTU0001_2113	EET78091.1	GenBank	73572	Corynebacterium tuberculostearicum SK141 contig00424, whole genome shotgun sequence
ACSH02000004	HMPREF0299_7220	EFM49665.1	GenBank	507076	Corynebacterium matruchotii ATCC 14266 gcontig_1125149795839, whole genome shotgun sequence
AMEM01000040	HMPREF9997_02385	EKX88022.1	GenBank	159701	Corynebacterium durum F0235 C_durum-1.0_Cont189.1, whole genome shotgun sequence
CP006842	CGLY_15365	AHW65509.1	GenBank	3509786	Corynebacterium glyciniphilum AJ 3170, complete genome
CP006842	CGLY_15650	AHW65566.1	GenBank	3509786	Corynebacterium glyciniphilum AJ 3170, complete genome
CP008944	CATYP_10085	AIG64839.1	GenBank	2311380	Corynebacterium atypicum strain R2070, complete genome
CP009622	CulFRC11_2104	AIU33652.1	GenBank	2442826	Corynebacterium ulcerans FRC11, complete genome
CP011913	CulFRC58_2239	AKN78093.1	GenBank	2542597	Corynebacterium ulcerans FRC58, complete genome
CP009247	CFRA_11185	APT89695.1	GenBank	2604152	Corynebacterium frankenforstense DSM 45800 strain ST18, complete genome
QFNY01000109	DI609_05625	PZP00812.1	GenBank	7161	MAG: Corynebacterium urealyticum isolate S2_012_000_R3_87 S2_012_000_R3_scaffold_2419, whole genome shotgun sequence
UFXP01000001	NCTC10289_02501	STC81695.1	GenBank	2722656	Corynebacterium minutissimum strain NCTC10289 genome assembly, contig: ERS1681014SCcontig000001, whole genome shotgun sequence
LR134408	NCTC934_02150	VEH73832.1	GenBank	2373440	Corynebacterium segmentosum strain NCTC934 genome assembly, chromosome: 1
VKDI01000003	FNY88_01605	TRX50503.1	GenBank	156400	Corynebacterium guaraldiae strain 2299 NODE_3_length_156400_cov_208.157, whole genome shotgun sequence
VSZI01000001	FYJ87_01945	TYR19784.1	GenBank	1971299	Corynebacterium urealyticum strain VH4248 SCF_001, whole genome shotgun sequence
WBZJ01000003	F8377_08885	KAB3520004.1	GenBank	304726	Corynebacterium zhongnanshanii strain zg-336 Scaffold3_1, whole genome shotgun sequence
CP046453	CETAM_00495	QGU03392.1	GenBank	2803752	Corynebacterium comes strain 2019 chromosome, complete genome
CP046453	CETAM_12615	QGU05754.1	GenBank	2803752	Corynebacterium comes strain 2019 chromosome, complete genome
CP021417	CBE74_11385	ARU46944.1	GenBank	2572864	Corynebacterium silvaticum strain PO100/5 chromosome, complete genome
CP063189	CMASS_09870	WCZ33385.1	GenBank	2237865	Corynebacterium massiliense DSM 45435 chromosome, complete genome
CP126969	QP027_10775	WIM67561.1	GenBank	2567397	Corynebacterium breve strain R4 chromosome, complete genome
CP126970	QP029_03410	WIM70883.1	GenBank	2858263	Corynebacterium suedekumii strain LM112 chromosome, complete genome
NC_000962	Rv3597c	NP_218114.1	RefSeq	4411532	Mycobacterium tuberculosis H37Rv, complete genome
NC_002677	ML_RS01180	WP_010907618.1	RefSeq	3268203	Mycobacterium leprae TN, complete sequence
NC_010397	MAB_RS02915	WP_005065018.1	RefSeq	5067172	Mycobacteroides abscessus ATCC 19977, complete sequence
NC_022663	MKAN_RS11800	WP_023368518.1	RefSeq	6432277	Mycobacterium kansasii ATCC 12478, complete sequence
NZ_CP080274	KZ780_RS29110	WP_011731033.1	RefSeq	6895172	Mycolicibacterium smegmatis strain Jucho chromosome, complete genome
PQ559664	PQ559664_00039	PQ559664_00039	INPHARED	75250	Mycobacterium phage AmericanBeauty
PQ201086	PQ201086_00033	PQ201086_00033	INPHARED	52161	Mycobacterium phage Darrell
PP978894	PP978894_00045	PP978894_00045	INPHARED	48953	Streptomyces phage Conan
PP978847	PP978847_00037	PP978847_00037	INPHARED	70942	Mycobacterium phage Teaspoon
PP978831	PP978831_00037	PP978831_00037	INPHARED	75722	Mycobacterium phage StellaBean
PP978826	PP978826_00037	PP978826_00037	INPHARED	76419	Mycobacterium phage Balomoji
PP978812	PP978812_00046	PP978812_00046	INPHARED	48922	Streptomyces phage ElGato
PP750964	PP750964_00037	PP750964_00037	INPHARED	75006	Mycobacterium Phage BigBubba
PP750963	PP750963_00040	PP750963_00040	INPHARED	75925	Mycobacterium phage Stank
PP750962	PP750962_00038	PP750962_00038	INPHARED	75179	Mycobacterium Phage Xandras
PP750867	PP750867_00047	PP750867_00047	INPHARED	48381	Streptomyces phage Kamino
PP405124	PP405124_00036	PP405124_00036	INPHARED	76734	Mycobacterium phage Bazzle
PP465982	PP465982_00036	PP465982_00036	INPHARED	68809	Mycobacterium phage MS810
PP208932	PP208932_00037	PP208932_00037	INPHARED	75585	Mycobacterium phage SophKB
OR464710	OR464710_00002	OR464710_00002	INPHARED	74463	Mycobacterium phage mushipu
OR553905	OR553905_00077	OR553905_00077	INPHARED	133228	Microbacterium phage Magritte
OM203161	OM203161_00033	OM203161_00033	INPHARED	53516	Mycobacterium phage SororFago
MT657341	MT657341_00003	MT657341_00003	INPHARED	83601	Mycobacterium phage Estes
MT658802	MT658802_00003	MT658802_00003	INPHARED	83412	Mycobacterium phage Aziz
MN369764	MN369764_00031	MN369764_00031	INPHARED	52816	Mycobacterium phage Rahalelujah
MN310541	MN310541_00032	MN310541_00032	INPHARED	52466	Mycobacterium phage Jeeves
OR813930	OR813930_00053	OR813930_00053	INPHARED	115158	Mycobacterium phage WXIN
OR521086	OR521086_00037	OR521086_00037	INPHARED	73415	Mycobacterium phage Highbury
OR521083	OR521083_00003	OR521083_00003	INPHARED	80037	Mycobacterium phage Diminimus
OR521082	OR521082_00038	OR521082_00038	INPHARED	76740	Mycobacterium phage Marshmallow
OR521061	OR521061_00037	OR521061_00037	INPHARED	73415	Mycobacterium phage Saints25
OR553916	OR553916_00003	OR553916_00003	INPHARED	80038	Mycobacterium phage Dulcita
OR553909	OR553909_00003	OR553909_00003	INPHARED	81156	Mycobacterium phage Glaske16
OR553904	OR553904_00039	OR553904_00039	INPHARED	75270	Mycobacterium phage StolenFromERC
MK524501	MK524501_00047	MK524501_00047	INPHARED	91510	Gordonia phage BrutonGaster
OR253916	OR253916_00003	OR253916_00003	INPHARED	81421	Mycobacterium phage Auspice
OR253902	OR253902_00037	OR253902_00037	INPHARED	75915	Mycobacterium Phage Holt
OR195048	OR195048_00055	OR195048_00055	INPHARED	110129	Mycobacterium phage Bombitas
OR475265	OR475265_00059	OR475265_00059	INPHARED	93062	Gordonia phage Culver
OQ995440	OQ995440_00033	OQ995440_00033	INPHARED	74900	Mycobacterium phage Calm
OQ995439	OQ995439_00047	OQ995439_00047	INPHARED	48907	Streptomyces phage Dexers
OQ995429	OQ995429_00047	OQ995429_00047	INPHARED	49042	Streptomyces phage Provolone
OP751148	OP751148_00067	OP751148_00067	INPHARED	57163	Streptomyces phage Success
ON970615	ON970615_00038	ON970615_00038	INPHARED	74943	Mycobacterium phage Baudelaire
ON755181	ON755181_00032	ON755181_00032	INPHARED	75593	Mycobacterium phage DuncansLeg
OP021679	OP021679_00032	OP021679_00032	INPHARED	52861	Gordonia phage Anaysia
ON456345	ON456345_00039	ON456345_00039	INPHARED	76092	Mycobacterium Phage Bench
OM818328	OM818328_00032	OM818328_00032	INPHARED	52206	Gordonia phage Switzerland
OL455899	OL455899_00036	OL455899_00036	INPHARED	76520	Mycobacterium phage Vetrix
MZ958748	MZ958748_00057	MZ958748_00057	INPHARED	113075	Mycobacterium phage JuicyJay
OK040786	OK040786_00037	OK040786_00037	INPHARED	76731	Gordonia phage Kudefre
MZ681508	MZ681508_00032	MZ681508_00032	INPHARED	52178	Gordonia Phage Boohoo
MZ681505	MZ681505_00039	MZ681505_00039	INPHARED	75998	Mycobacterium phage Tarkin
MZ622183	MZ622183_00032	MZ622183_00032	INPHARED	69480	Mycobacterium phage Moostard
MZ622176	MZ622176_00032	MZ622176_00032	INPHARED	51468	Gordonia phage Looper
MZ622158	MZ622158_00038	MZ622158_00038	INPHARED	76192	Mycobacterium phage Thresher
MZ171373	MZ171373_00036	MZ171373_00036	INPHARED	76652	Mycobacterium phage DrSeegs
MZ388552	MZ388552_00055	MZ388552_00055	INPHARED	92405	Gordonia phage Norvs
MZ274305	MZ274305_00037	MZ274305_00037	INPHARED	75933	Mycobacterium phage ShamWow
MZ005679	MZ005679_00032	MZ005679_00032	INPHARED	76685	Mycobacterium phage Chaser
MW822149	MW822149_00033	MW822149_00033	INPHARED	73949	Mycobacterium phage Rose5
MZ028625	MZ028625_00032	MZ028625_00032	INPHARED	52969	Gordonia phage DekHockey33
MW578835	MW578835_00036	MW578835_00036	INPHARED	76366	Mycobacterium phage Netyap
MW435855	MW435855_00033	MW435855_00033	INPHARED	72623	Mycobacterium phage OhShagHennessy
MW132714	MW132714_00056	MW132714_00056	INPHARED	109901	Mycobacterium phage Pound
MW291024	MW291024_00033	MW291024_00033	INPHARED	75782	Mycobacterium phage Jubie
MW291023	MW291023_00036	MW291023_00036	INPHARED	76859	Mycobacterium phage Harella
MT889391	MT889391_00032	MT889391_00032	INPHARED	70064	Mycobacterium phage MiniMac
MT889383	MT889383_00032	MT889383_00032	INPHARED	75793	Mycobacterium phage MiniLon
MT771349	MT771349_00033	MT771349_00033	INPHARED	74429	Mycobacterium phage Tyson
MT684599	MT684599_00037	MT684599_00037	INPHARED	76058	Gordonia Phage Sephiroth
MT657339	MT657339_00043	MT657339_00043	INPHARED	94031	Gordonia phage SpeedDemon
MT658805	MT658805_00039	MT658805_00039	INPHARED	76821	Gordonia phage Rabbitrun
MT658803	MT658803_00003	MT658803_00003	INPHARED	82356	Mycobacterium phage Reindeer
MT639645	MT639645_00032	MT639645_00032	INPHARED	52698	Mycobacterium phage PainterBoy
MT522007	MT522007_00032	MT522007_00032	INPHARED	52314	Gordonia phage Epsocamisio
MT522005	MT522005_00036	MT522005_00036	INPHARED	76169	Mycobacterium phage Misfit
MT522004	MT522004_00034	MT522004_00034	INPHARED	53702	Mycobacterium phage Gail
MT498054	MT498054_00057	MT498054_00057	INPHARED	93340	Gordonia Phage Engineer
MT310862	MT310862_00047	MT310862_00047	INPHARED	50426	Streptomyces phage Itza
MT114165	MT114165_00038	MT114165_00038	INPHARED	75679	Mycobacterium phage BadStone
MN908691	MN908691_00043	MN908691_00043	INPHARED	92498	Gordonia phage DatBoi
MN586043	MN586043_00035	MN586043_00035	INPHARED	76688	Mycobacterium phage Buck
MN586037	MN586037_00039	MN586037_00039	INPHARED	75129	Mycobacterium phage GooberAzure
MN586029	MN586029_00051	MN586029_00051	INPHARED	111740	Mycobacterium phage Hannaconda
MN586024	MN586024_00003	MN586024_00003	INPHARED	81039	Mycobacterium phage TyDawg
MN369756	MN369756_00032	MN369756_00032	INPHARED	52661	Gordonia phage Anon
MN444870	MN444870_00036	MN444870_00036	INPHARED	75606	Gordonia phage Syleon
MN428059	MN428059_00039	MN428059_00039	INPHARED	75453	Mycobacterium phage Kanye
MN284898	MN284898_00032	MN284898_00032	INPHARED	52549	Gordonia phage MinecraftSteve
MN234209	MN234209_00029	MN234209_00029	INPHARED	53055	Mycobacterium phage Toaka
MN234188	MN234188_00029	MN234188_00029	INPHARED	52202	Mycobacterium phage Anthony
MN234187	MN234187_00033	MN234187_00033	INPHARED	77566	Mycobacterium phage DyoEdafos
MN234167	MN234167_00032	MN234167_00032	INPHARED	53370	Mycobacterium phage Vanisoa
MN310542	MN310542_00033	MN310542_00033	INPHARED	53549	Mycobacterium phage Keziacharles14
MN204498	MN204498_00046	MN204498_00046	INPHARED	48883	Streptomyces phage Saftant
MK967382	MK967382_00032	MK967382_00032	INPHARED	52601	Gordonia phage ReMo
MK967379	MK967379_00052	MK967379_00052	INPHARED	113067	Mycobacterium phage HokkenD
MN096382	MN096382_00033	MN096382_00033	INPHARED	73721	Mycobacterium phage AvadaKedavra
MN096380	MN096380_00036	MN096380_00036	INPHARED	76734	Mycobacterium phage Lewan
MN096377	MN096377_00032	MN096377_00032	INPHARED	75632	Mycobacterium phage Finnry
MN096376	MN096376_00032	MN096376_00032	INPHARED	52987	Mycobacterium phage Lucyedi
MN096364	MN096364_00036	MN096364_00036	INPHARED	74707	Mycobacterium phage Tomaszewski
MN096361	MN096361_00035	MN096361_00035	INPHARED	76351	Mycobacterium phage Gator
MK937600	MK937600_00036	MK937600_00036	INPHARED	76414	Mycobacterium phage Wigglewiggle
MK937593	MK937593_00034	MK937593_00034	INPHARED	75248	Mycobacterium phage Flypotenuse
MK801726	MK801726_00036	MK801726_00036	INPHARED	76145	Mycobacterium phage ChotaBhai
MK878900	MK878900_00033	MK878900_00033	INPHARED	75617	Mycobacterium phage MsGreen
MK977705	MK977705_00044	MK977705_00044	INPHARED	90669	Gordonia phage Mollymur
MK757445	MK757445_00038	MK757445_00038	INPHARED	75360	Mycobacterium phage Lilizi
MK494100	MK494100_00033	MK494100_00033	INPHARED	73871	Mycobacterium phage Halena
MK559429	MK559429_00038	MK559429_00038	INPHARED	75240	Mycobacterium phage Moldemort
MK468591	MK468591_00033	MK468591_00033	INPHARED	53365	Mycobacterium phage Arissanae
MK524529	MK524529_00057	MK524529_00057	INPHARED	114320	Mycobacterium phage Phoebus
MK524527	MK524527_00056	MK524527_00056	INPHARED	113254	Mycobacterium phage ThreeRngTarjay
MK524516	MK524516_00058	MK524516_00058	INPHARED	110636	Mycobacterium phage Bobby
MK524504	MK524504_00055	MK524504_00055	INPHARED	112884	Mycobacterium phage Hughesyang
MK433262	MK433262_00036	MK433262_00036	INPHARED	76435	Mycobacterium phage Nimrod
MK359320	MK359320_00037	MK359320_00037	INPHARED	76340	Mycobacterium phage Cookies
MK359309	MK359309_00038	MK359309_00038	INPHARED	75075	Mycobacterium phage Czyszczon1
MK310144	MK310144_00033	MK310144_00033	INPHARED	71059	Mycobacterium phage CicholasNage
MK376959	MK376959_00055	MK376959_00055	INPHARED	93276	Gordonia phage Aphelion
MK376956	MK376956_00056	MK376956_00056	INPHARED	92688	Gordonia phage WilliamBoone
MK279849	MK279849_00057	MK279849_00057	INPHARED	111970	Mycobacterium phage Duke13
MH976515	MH976515_00037	MH976515_00037	INPHARED	76358	Gordonia phage Octobien14
MK016502	MK016502_00036	MK016502_00036	INPHARED	75675	Mycobacterium phage Pat3
MK016501	MK016501_00037	MK016501_00037	INPHARED	85613	Mycobacterium phage Nebkiss
MK016498	MK016498_00035	MK016498_00035	INPHARED	76023	Mycobacterium phage Manda
MK016491	MK016491_00036	MK016491_00036	INPHARED	76377	Mycobacterium phage BaboJay
MH834600	MH834600_00036	MH834600_00036	INPHARED	72810	Mycobacterium phage BigCheese
MH779511	MH779511_00036	MH779511_00036	INPHARED	75440	Mycobacterium phage LilDestine
MH779503	MH779503_00039	MH779503_00039	INPHARED	75649	Mycobacterium phage Gemini
MH744425	MH744425_00033	MH744425_00033	INPHARED	74392	Mycobacterium phage Wamburgrxpress
MH727559	MH727559_00032	MH727559_00032	INPHARED	75307	Mycobacterium phage Samty
MH727557	MH727557_00039	MH727557_00039	INPHARED	75640	Mycobacterium phage Paperbeatsrock
MH727551	MH727551_00053	MH727551_00053	INPHARED	110713	Mycobacterium phage Kalah2
MH651182	MH651182_00037	MH651182_00037	INPHARED	75813	Gordonia phage Neville
MH651174	MH651174_00037	MH651174_00037	INPHARED	75598	Mycobacterium phage Easy2Say
MH669017	MH669017_00057	MH669017_00057	INPHARED	111740	Mycobacterium phage Zelink
MH669002	MH669002_00037	MH669002_00037	INPHARED	75295	Mycobacterium phage Emmina
MH697587	MH697587_00003	MH697587_00003	INPHARED	81036	Mycobacterium phage IPhane7
MH697583	MH697583_00058	MH697583_00058	INPHARED	113536	Mycobacterium phage EricMillard
MH697582	MH697582_00057	MH697582_00057	INPHARED	111924	Mycobacterium phage Ejimix
MH590603	MH590603_00039	MH590603_00039	INPHARED	90490	Gordonia phage Daredevil
MH590587	MH590587_00037	MH590587_00037	INPHARED	76915	Mycobacterium phage xkcd
MH576973	MH576973_00034	MH576973_00034	INPHARED	70183	Mycobacterium phage Bromden
MH576956	MH576956_00036	MH576956_00036	INPHARED	74070	Mycobacterium phage Inca
MH576953	MH576953_00039	MH576953_00039	INPHARED	75586	Mycobacterium phage Hopey
MH513983	MH513983_00039	MH513983_00039	INPHARED	76133	Mycobacterium phage ShereKhan
MH513978	MH513978_00035	MH513978_00035	INPHARED	75685	Mycobacterium phage Phaja
MH513974	MH513974_00032	MH513974_00032	INPHARED	52619	Gordonia phage LastResort
MH513972	MH513972_00035	MH513972_00035	INPHARED	75668	Mycobacterium phage IHOP
MH536829	MH536829_00039	MH536829_00039	INPHARED	75359	Mycobacterium phage TBrady12
MH536827	MH536827_00037	MH536827_00037	INPHARED	75366	Mycobacterium phage Simpliphy
MH536820	MH536820_00035	MH536820_00035	INPHARED	76498	Mycobacterium phage Glexan
MH399778	MH399778_00036	MH399778_00036	INPHARED	74169	Mycobacterium phage Icee
MH399774	MH399774_00036	MH399774_00036	INPHARED	75070	Mycobacterium phage DoctorDiddles
MH371112	MH371112_00039	MH371112_00039	INPHARED	75208	Mycobacterium phage Adnama
MH248947	MH248947_00049	MH248947_00049	INPHARED	50129	Streptomyces phage Yosif
MH316566	MH316566_00031	MH316566_00031	INPHARED	53140	Gordonia phage Nedarya
MH077579	MH077579_00058	MH077579_00058	INPHARED	112351	Mycobacterium phage Halley
JN699628	JN699628_00003	JN699628_00003	INPHARED	80228	Mycobacterium phage Bongo
MH020247	MH020247_00035	MH020247_00035	INPHARED	75605	Mycobacterium phage MPhalcon
MH000607	MH000607_00037	MH000607_00037	INPHARED	75565	Mycobacterium phage RiverMonster
MH001454	MH001454_00032	MH001454_00032	INPHARED	52856	Gordonia phage Waits
MG872843	MG872843_00037	MG872843_00037	INPHARED	76299	Mycobacterium phage Sotrice96
MG872837	MG872837_00039	MG872837_00039	INPHARED	71650	Mycobacterium phage Gage
MG872832	MG872832_00036	MG872832_00036	INPHARED	74594	Mycobacterium phage Barbarian
MG872831	MG872831_00036	MG872831_00036	INPHARED	74594	Mycobacterium phage Asriel
MG757160	MG757160_00039	MG757160_00039	INPHARED	75829	Mycobacterium phage Kimchi
KM400683	KM400683_00054	KM400683_00054	INPHARED	109801	Mycobacterium phage Ariel
KC691255	KC691255_00038	KC691255_00038	INPHARED	75736	Mycobacterium phage Dumbo
JF937091	JF937091_00037	JF937091_00037	INPHARED	74997	Mycobacterium phage Bask21
MF919537	MF919537_00056	MF919537_00056	INPHARED	92546	Gordonia phage Toniann
MG099953	MG099953_00037	MG099953_00037	INPHARED	75896	Mycobacterium phage Youngblood
MG298964	MG298964_00047	MG298964_00047	INPHARED	48803	Streptomyces phage Alsaber
MF919534	MF919534_00055	MF919534_00055	INPHARED	109799	Mycobacterium phage Superphikiman
MF919524	MF919524_00035	MF919524_00035	INPHARED	75808	Mycobacterium phage MISSy
MF919541	MF919541_00038	MF919541_00038	INPHARED	73697	Mycobacterium phage YassJohnny
MF919540	MF919540_00035	MF919540_00035	INPHARED	74576	Mycobacterium phage Willez
MF919535	MF919535_00036	MF919535_00036	INPHARED	76169	Mycobacterium phage Terminus
MF919529	MF919529_00035	MF919529_00035	INPHARED	73495	Mycobacterium phage Sassay
MF919525	MF919525_00035	MF919525_00035	INPHARED	77053	Mycobacterium phage Murica
MF919520	MF919520_00056	MF919520_00056	INPHARED	93201	Gordonia phage Lozinak
MF919512	MF919512_00059	MF919512_00059	INPHARED	112329	Mycobacterium phage Klein
MF919506	MF919506_00036	MF919506_00036	INPHARED	76217	Mycobacterium phage FireRed
MF919504	MF919504_00057	MF919504_00057	INPHARED	112285	Mycobacterium phage DmpstrDiver
MG009575	MG009575_00004	MG009575_00004	INPHARED	70373	Mycobacterium phage Kumao
MF185728	MF185728_00036	MF185728_00036	INPHARED	77031	Mycobacterium phage Finemlucis
MF668284	MF668284_00053	MF668284_00053	INPHARED	110240	Mycobacterium phage Squint
MF668282	MF668282_00032	MF668282_00032	INPHARED	51238	Gordonia phage ShayRa
MF668277	MF668277_00037	MF668277_00037	INPHARED	75554	Mycobacterium phage MadamMonkfish
MF324910	MF324910_00036	MF324910_00036	INPHARED	76315	Mycobacterium phage GuuelaD
MF140422	MF140422_00036	MF140422_00036	INPHARED	75822	Mycobacterium phage Nicholasp3
MF140421	MF140421_00033	MF140421_00033	INPHARED	70413	Mycobacterium phage Nicholas
MF140414	MF140414_00032	MF140414_00032	INPHARED	76075	Mycobacterium phage Krypton555
MF140413	MF140413_00033	MF140413_00033	INPHARED	69537	Mycobacterium phage Kingsolomon
MF185726	MF185726_00033	MF185726_00033	INPHARED	73808	Mycobacterium phage Appletree2
MF140405	MF140405_00033	MF140405_00033	INPHARED	72055	Mycobacterium phage Clautastrophe
MF185730	MF185730_00036	MF185730_00036	INPHARED	76653	Mycobacterium phage Miley16
KY783914	KY783914_00003	KY783914_00003	INPHARED	80309	Mycobacterium phage GardenSalsa
KY549152	KY549152_00037	KY549152_00037	INPHARED	75215	Mycobacterium phage Maxxinista
KY319168	KY319168_00037	KY319168_00037	INPHARED	76483	Mycobacterium phage CrystalP
KY223999	KY223999_00003	KY223999_00003	INPHARED	84303	Mycobacterium phage MrMagoo
KX817173	KX817173_00038	KX817173_00038	INPHARED	76944	Mycobacterium phage Tuco
KX611831	KX611831_00038	KX611831_00038	INPHARED	75779	Mycobacterium phage Pharsalus
KX580962	KX580962_00036	KX580962_00036	INPHARED	75806	Mycobacterium phage Wilder
KX580961	KX580961_00036	KX580961_00036	INPHARED	76363	Mycobacterium phage Zakai
KX557284	KX557284_00032	KX557284_00032	INPHARED	52738	Gordonia phage Strosahl
KX557283	KX557283_00032	KX557283_00032	INPHARED	52738	Gordonia phage Remus
KX557280	KX557280_00032	KX557280_00032	INPHARED	52726	Gordonia phage JSwag
KX557276	KX557276_00059	KX557276_00059	INPHARED	93686	Gordonia phage Cucurbita
KX557272	KX557272_00040	KX557272_00040	INPHARED	92580	Gordonia phage Bantam
KX507361	KX507361_00036	KX507361_00036	INPHARED	76012	Mycobacterium phage Gardann
KX344445	KX344445_00047	KX344445_00047	INPHARED	50082	Streptomyces phage Nanodon
KU997639	KU997639_00036	KU997639_00036	INPHARED	76492	Mycobacterium phage Loadrie
KU998251	KU998251_00032	KU998251_00032	INPHARED	52689	Gordonia phage KatherineG
KU998250	KU998250_00032	KU998250_00032	INPHARED	52684	Gordonia phage Rosalind
KU998249	KU998249_00032	KU998249_00032	INPHARED	52924	Gordonia phage Soups
KU998247	KU998247_00057	KU998247_00057	INPHARED	93843	Gordonia phage Bachita
KU998246	KU998246_00057	KU998246_00057	INPHARED	92618	Gordonia phage ClubL
KU998245	KU998245_00051	KU998245_00051	INPHARED	93577	Gordonia phage OneUp
KU998244	KU998244_00056	KU998244_00056	INPHARED	93139	Gordonia phage Smoothie
KU865303	KU865303_00036	KU865303_00036	INPHARED	74896	Mycobacterium phage TeardropMSU
KU234099	KU234099_00036	KU234099_00036	INPHARED	75844	Mycobacterium phage MkaliMitinis3
KT588442	KT588442_00032	KT588442_00032	INPHARED	53141	Mycobacterium phage LadyBird
KT281794	KT281794_00033	KT281794_00033	INPHARED	75626	Mycobacterium phage Snenia
KT591491	KT591491_00003	KT591491_00003	INPHARED	81128	Mycobacterium phage Bricole
KT591489	KT591489_00037	KT591489_00037	INPHARED	76271	Mycobacterium phage Archie
KT281791	KT281791_00032	KT281791_00032	INPHARED	75816	Mycobacterium phage Lolly9
KT372003	KT372003_00033	KT372003_00033	INPHARED	75586	Mycobacterium phage Lumos
KT373978	KT373978_00038	KT373978_00038	INPHARED	75114	Mycobacterium phage Ukulele
KT186229	KT186229_00048	KT186229_00048	INPHARED	49483	Streptomyces phage Verse
KT186228	KT186228_00048	KT186228_00048	INPHARED	49452	Streptomyces phage Amela
KT020852	KT020852_00037	KT020852_00037	INPHARED	74655	Mycobacterium phage NoSleep
KT222942	KT222942_00037	KT222942_00037	INPHARED	75339	Mycobacterium phage Dusk
KT222941	KT222941_00036	KT222941_00036	INPHARED	72790	Mycobacterium phage NelitzaMV
KR080204	KR080204_00036	KR080204_00036	INPHARED	75796	Mycobacterium phage Mindy
KR080193	KR080193_00035	KR080193_00035	INPHARED	53387	Mycobacterium phage Luchador
KM925136	KM925136_00055	KM925136_00055	INPHARED	110764	Mycobacterium phage MiaZeal
KM101123	KM101123_00062	KM101123_00062	INPHARED	109871	Mycobacterium phage Minerva
KJ567043	KJ567043_00038	KJ567043_00038	INPHARED	90460	Mycobacterium phage Gaia
KF861510	KF861510_00033	KF861510_00033	INPHARED	52974	Mycobacterium phage EagleEye
KF493883	KF493883_00036	KF493883_00036	INPHARED	74533	Mycobacterium phage Mosby
KF562102	KF562102_00036	KF562102_00036	INPHARED	76217	Mycobacterium phage PhatBacter
KF562101	KF562101_00036	KF562101_00036	INPHARED	75894	Mycobacterium phage Nala
KF562100	KF562100_00035	KF562100_00035	INPHARED	76323	Mycobacterium phage HufflyPuff
KF562099	KF562099_00037	KF562099_00037	INPHARED	74210	Mycobacterium phage Bruin
KF416343	KF416343_00037	KF416343_00037	INPHARED	76483	Mycobacterium phage Goku
KF306380	KF306380_00039	KF306380_00039	INPHARED	77367	Mycobacterium phage DrDrey
KF024732	KF024732_00036	KF024732_00036	INPHARED	74533	Mycobacterium phage Contagion
KF024731	KF024731_00036	KF024731_00036	INPHARED	76129	Mycobacterium phage Crossroads
KF024725	KF024725_00032	KF024725_00032	INPHARED	76050	Mycobacterium phage Whirlwind
KF006818	KF006818_00062	KF006818_00062	INPHARED	109960	Mycobacterium phage Wanda
KF114875	KF114875_00055	KF114875_00055	INPHARED	108297	Mycobacterium phage Redno2
KF188414	KF188414_00037	KF188414_00037	INPHARED	76131	Mycobacterium phage ABCat
KC748971	KC748971_00037	KC748971_00037	INPHARED	76179	Mycobacterium phage Murphy
KC748969	KC748969_00036	KC748969_00036	INPHARED	76479	Mycobacterium phage Phaux
KC691254	KC691254_00036	KC691254_00036	INPHARED	76652	Mycobacterium phage Breezona
KC900379	KC900379_00003	KC900379_00003	INPHARED	80955	Mycobacterium phage PegLeg
KC661277	KC661277_00038	KC661277_00038	INPHARED	74711	Mycobacterium phage Phrux
KC661276	KC661276_00036	KC661276_00036	INPHARED	76653	Mycobacterium phage Winky
JN698997	JN698997_00055	JN698997_00055	INPHARED	110569	Mycobacterium phage Courthouse
JN680858	JN680858_00036	JN680858_00036	INPHARED	69279	Mycobacterium phage Rumpelstiltskin
JN412590	JN412590_00036	JN412590_00036	INPHARED	76174	Mycobacterium phage Eureka
JN391441	JN391441_00037	JN391441_00037	INPHARED	74675	Mycobacterium phage Elph10
JN382248	JN382248_00038	JN382248_00038	INPHARED	76260	Mycobacterium phage Lilac
JF937106	JF937106_00035	JF937106_00035	INPHARED	75973	Mycobacterium phage SirDuracell
JF937105	JF937105_00003	JF937105_00003	INPHARED	83724	Mycobacterium phage Rey
JF937101	JF937101_00055	JF937101_00055	INPHARED	109086	Mycobacterium phage LittleE
JF937096	JF937096_00038	JF937096_00038	INPHARED	76049	Mycobacterium phage Henry
JF937090	JF937090_00059	JF937090_00059	INPHARED	111688	Mycobacterium phage Baka
JF704113	JF704113_00033	JF704113_00033	INPHARED	73784	Mycobacterium phage UPIE
JF704108	JF704108_00033	JF704108_00033	INPHARED	74914	Mycobacterium phage JoeDirt
JN006062	JN006062_00038	JN006062_00038	INPHARED	75706	Mycobacterium phage Rakim
JN006061	JN006061_00037	JN006061_00037	INPHARED	75933	Mycobacterium phage Toto
JF957059	JF957059_00059	JF957059_00059	INPHARED	109270	Mycobacterium phage Optimus
JF744988	JF744988_00036	JF744988_00036	INPHARED	75960	Mycobacterium phage Faith1
HM152763	HM152763_00033	HM152763_00033	INPHARED	73453	Mycobacterium phage LeBron
GQ303265	GQ303265_00040	GQ303265_00040	INPHARED	74491	Mycobacterium phage Pumpkin
EU816591	EU816591_00038	EU816591_00038	INPHARED	75811	Mycobacterium phage Kostya
EU816588	EU816588_00037	EU816588_00037	INPHARED	76312	Mycobacterium phage Porky
DQ398041	DQ398041_00039	DQ398041_00039	INPHARED	74483	Mycobacterium phage 244
AY129338	AY129338_00058	AY129338_00058	INPHARED	110865	Mycobacterium phage Omega
AY129331	AY129331_00038	AY129331_00038	INPHARED	75931	Mycobacterium phage Cjw1
OQ970438	OQ970438_00043	OQ970438_00043	INPHARED	50426	Streptomyces phage Vanseggelen
OR159677	OR159677_00032	OR159677_00032	INPHARED	52175	Gordonia phage Nebulosus
OR159668	OR159668_00038	OR159668_00038	INPHARED	74943	Mycobacterium phage Aegeus
OR159663	OR159663_00057	OR159663_00057	INPHARED	92817	Gordonia Phage PhinkBoden
OQ672752	OQ672752_00047	OQ672752_00047	INPHARED	48427	Streptomyces phage phiScoe56
OQ672751	OQ672751_00047	OQ672751_00047	INPHARED	48461	Streptomyces phage phiScoe55
OQ672750	OQ672750_00046	OQ672750_00046	INPHARED	48721	Streptomyces phage phiScoe54
OQ672749	OQ672749_00047	OQ672749_00047	INPHARED	48816	Streptomyces phage phiScoe45
OQ672748	OQ672748_00047	OQ672748_00047	INPHARED	48760	Streptomyces phage phiScoe44
OQ672747	OQ672747_00047	OQ672747_00047	INPHARED	48350	Streptomyces phage phiScoe3
OQ672746	OQ672746_00048	OQ672746_00048	INPHARED	49465	Streptomyces phage phiScoe25
OQ672744	OQ672744_00047	OQ672744_00047	INPHARED	49387	Streptomyces phage phiScoe2
OQ672743	OQ672743_00046	OQ672743_00046	INPHARED	49356	Streptomyces phage phiScoe15
OQ672742	OQ672742_00051	OQ672742_00051	INPHARED	51094	Streptomyces phage phiScoe10
OQ129411	OQ129411_00032	OQ129411_00032	INPHARED	52753	Gordonia phage Battleship
ON970600	ON970600_00038	ON970600_00038	INPHARED	75908	Mycobacterium phage Quallification
ON970597	ON970597_00039	ON970597_00039	INPHARED	75132	Mycobacterium phage Argent26
ON526983	ON526983_00047	ON526983_00047	INPHARED	50193	Streptomyces phage VieEnRose
MN703410	MN703410_00036	MN703410_00036	INPHARED	74937	Mycobacterium phage Itos
MN703406	MN703406_00036	MN703406_00036	INPHARED	75383	Mycobacterium phage Gabriela
MN586052	MN586052_00036	MN586052_00036	INPHARED	75952	Mycobacterium phage Kahlid
MN586051	MN586051_00037	MN586051_00037	INPHARED	76419	Mycobacterium phage Myrale
MN586032	MN586032_00037	MN586032_00037	INPHARED	76025	Mycobacterium phage Command613
MN586030	MN586030_00036	MN586030_00036	INPHARED	68102	Mycobacterium phage BobsGarage
MN586023	MN586023_00033	MN586023_00033	INPHARED	74365	Mycobacterium phage Zaria
MN586018	MN586018_00033	MN586018_00033	INPHARED	74010	Mycobacterium phage Wyatt2
MN586013	MN586013_00035	MN586013_00035	INPHARED	75423	Mycobacterium phage Traaww1
MN617841	MN617841_00033	MN617841_00033	INPHARED	68021	Mycobacterium phage DirkDirk
MN234228	MN234228_00037	MN234228_00037	INPHARED	77876	Mycobacterium phage Tourach
MN234189	MN234189_00047	MN234189_00047	INPHARED	50448	Streptomyces phage Urza
MN062705	MN062705_00047	MN062705_00047	INPHARED	50493	Streptomyces phage Celia
MK494092	MK494092_00033	MK494092_00033	INPHARED	73210	Mycobacterium phage Silverleaf
MK279905	MK279905_00033	MK279905_00033	INPHARED	73639	Mycobacterium phage Acquire49
OL742559	OL742559_00039	OL742559_00039	INPHARED	75132	Mycobacterium phage GoldenSpark
MT952854	MT952854_00037	MT952854_00037	INPHARED	74961	Mycobacterium phage Miniwave
MT723943	MT723943_00038	MT723943_00038	INPHARED	75603	Mycobacterium phage Cactus
MN183286	MN183286_00055	MN183286_00055	INPHARED	111437	Mycobacterium phage Yeet
MN062701	MN062701_00053	MN062701_00053	INPHARED	111843	Mycobacterium phage Dallas
MK967402	MK967402_00056	MK967402_00056	INPHARED	110439	Mycobacterium phage NihilNomen
MK967378	MK967378_00036	MK967378_00036	INPHARED	75943	Gordonia phage Trax
MK937612	MK937612_00003	MK937612_00003	INPHARED	81071	Mycobacterium phage LilhomieP
MK524521	MK524521_00054	MK524521_00054	INPHARED	111345	Mycobacterium phage Schatzie
MK620893	MK620893_00038	MK620893_00038	INPHARED	75528	Mycobacterium phage HanKaySha
MH399772	MH399772_00049	MH399772_00049	INPHARED	110169	Mycobacterium phage Constella
MF319184	MF319184_00003	MF319184_00003	INPHARED	80123	Mycobacterium phage GenevaB15
JN201525	JN201525_00047	JN201525_00047	INPHARED	106327	Mycobacterium phage Thibault
MZ958746	MZ958746_00033	MZ958746_00033	INPHARED	66420	Mycobacterium phage Enceladus
MZ622163	MZ622163_00038	MZ622163_00038	INPHARED	75692	Mycobacterium phage Filch
MZ622169	MZ622169_00057	MZ622169_00057	INPHARED	113128	Mycobacterium phage Beem
MZ622157	MZ622157_00039	MZ622157_00039	INPHARED	74903	Mycobacterium phage Wiggin
MZ322024	MZ322024_00039	MZ322024_00039	INPHARED	75099	Mycobacterium phage JeTaime
MW713383	MW713383_00003	MW713383_00003	INPHARED	81714	Mycobacterium phage SirSheldon
MW314846	MW314846_00051	MW314846_00051	INPHARED	111628	Mycobacterium phage KashFlow
MT701598	MT701598_00043	MT701598_00043	INPHARED	48481	Streptomyces phage Sitrop
MF133445	MF133445_00054	MF133445_00054	INPHARED	108627	Mycobacterium phage Lucky2013
MF072690	MF072690_00055	MF072690_00055	INPHARED	109575	Mycobacterium phage Porcelain
MN586050	MN586050_00036	MN586050_00036	INPHARED	74969	Mycobacterium phage Lilpickle
MN586044	MN586044_00035	MN586044_00035	INPHARED	75660	Mycobacterium phage Rimmer
MN586041	MN586041_00036	MN586041_00036	INPHARED	74969	Mycobacterium phage Elite2014
MN586035	MN586035_00038	MN586035_00038	INPHARED	74970	Mycobacterium phage ChosenOne
MN586034	MN586034_00039	MN586034_00039	INPHARED	75267	Mycobacterium phage Hoonter
MN586019	MN586019_00037	MN586019_00037	INPHARED	74731	Mycobacterium phage Stark
MN586017	MN586017_00038	MN586017_00038	INPHARED	75101	Mycobacterium phage OrionPax
MT758688	MT758688_00036	MT758688_00036	INPHARED	77086	Mycobacterium phage CELFI
MT711979	MT711979_00047	MT711979_00047	INPHARED	48829	Streptomyces phage Endor2
MT711978	MT711978_00046	MT711978_00046	INPHARED	49395	Streptomyces phage Endor1
KJ410134	KJ410134_00031	KJ410134_00031	INPHARED	52963	Mycobacterium phage CRB1
KJ192196	KJ192196_00033	KJ192196_00033	INPHARED	53396	Mycobacterium phage 40AC
KX815338	KX815338_00048	KX815338_00048	INPHARED	48941	Streptomyces phage Joe
KX834009	KX834009_00037	KX834009_00037	INPHARED	75728	Mycobacterium phage Goldilocks
KF279417	KF279417_00038	KF279417_00038	INPHARED	76586	Mycobacterium phage Quink
JX889246	JX889246_00049	JX889246_00049	INPHARED	50348	Streptomyces phage phiCAM
JN600672	JN600672_00033	JN600672_00033	INPHARED	74155	Mycobacterium phage Fezzik
PQ184822	PQ184822_00033	PQ184822_00033	INPHARED	73874	Mycobacterium phage MAckerman
PQ184818	PQ184818_00032	PQ184818_00032	INPHARED	74574	Mycobacterium phage Douge
PQ184790	PQ184790_00053	PQ184790_00053	INPHARED	108976	Mycobacterium phage Dove
PV165875	PV165875_00036	PV165875_00036	INPHARED	75894	Mycobacterium phage Policronamos
PQ723757	PQ723757_00047	PQ723757_00047	INPHARED	48901	Streptomyces phage Pavo
PQ723756	PQ723756_00058	PQ723756_00058	INPHARED	56760	Streptomyces phage Ponzi
PQ723754	PQ723754_00051	PQ723754_00051	INPHARED	49789	Streptomyces phage Speedwell
PQ723753	PQ723753_00047	PQ723753_00047	INPHARED	48825	Streptomyces phage Kaine
