# Supplementary material
Source: Research Square preprint supplement (doi:10.21203/rs.3.rs-9446490/v1)
Supplement: Supplementary file 3 [file 66ddd54d15c6b2e09a8f415e.xlsx]

## Sheet: (a) Annotation
Supplementary Table 3,a. Genome annotation of bacteriophage JeanGrey. Final genome annotation including ORF number, strand orientation, start and stop coordinates, ORF length, and predicted function. Predicted transmembrane domains and transcriptional terminators are indicated. Consecutive genes sharing the same color are assigned to putative operons based on RNA-seq data.
FINAL ORF Number	Direction	Start coordinates *	Stop coordinates *	Feature length	Comments structural annotation/ Predicted terminators (PhageScope performed on 2025-09-08)	TM domain withDeep TMHMM	Orpham in Phagedb	Functional annotation	Comment on functional annotation
1	FOR	1	2082	2082	--	NO	--	terminase
2	FOR	2186	2725	540	--	NO	Orpham	nucleic acid binding protein	based on AlphaFold 3
3	FOR	2777	3004	228	--	NO	Orpham	NKF
4	FOR	3004	3936	933	--	NO	--	NKF
5	FOR	4112	4678	567	--	NO	Orpham	NKF
6	FOR	4686	4949	264	--	NO	Orpham	NKF
7	FOR	4957	5592	636	TERM_1_5321:5652	YES (6 TMD)	Orpham	membrane protein	putative queuosine precursor transporter
8	FOR	5678	5929	252	longer by 3 nt, score slightly better	NO	Orpham	NKF
9	FOR	5919	6149	231	--	NO	Orpham	NKF
10	FOR	6249	6560	312		NO	--	NKF
11	FOR	6643	7221	579	--	NO	Orpham	NKF
12	FOR	7218	7916	699	--	NO	Orpham	NKF
13	FOR	7975	8169	195	--	NO	--	NKF
14	FOR	8180	8278	99	--	YES (1 TMD)	Orpham	membrane protein
15	FOR	8279	8611	333	--	NO	Orpham	NKF
16	FOR	8608	8763	156	--	NO	Orpham	NKF
17	FOR	8765	9097	333	--	NO	Orpham	NKF
18	FOR	9097	9705	609	--	NO	--	metallophosphatase
19	FOR	9759	10466	708	longest ORF	NO	--	ThyX-like thymidylate synthase
20	FOR	10459	10809	351	--	NO	--	NKF
21	FOR	10812	10976	165	--	NO	Orpham	NKF
22	FOR	11036	11455	420	--	NO	Orpham	NKF
23	FOR	11436	11876	441	--	YES (4 TMD)	Orpham	membrane protein
24	FOR	11878	12306	429	Avoids excessive overlap (prediction glimmer 11845, prediction genemark 11878), also compatible with BLASTP alignments with similar start	YES (1 TMD)	Orpham	membrane protein
25	FOR	12411	13904	1494	--	NO	Orpham	NKF
26	FOR	13907	14257	351	--	NO	--	NKF
27	FOR	14251	16443	2193	--	NO	--	Portal Protein
28	FOR	16437	16595	159	--	YES (1 TMD)	Orpham	membrane protein
29	FOR	16745	18226	1482	--	NO	Orpham	NKF
30	FOR	18216	20945	2730	--	NO	--	Capsid maturation protease
31	FOR	20957	21463	507	--	NO	--	Minor capsid protein	putative capsid decoration protein
32	FOR	21492	22487	996	TERM_2_22518:22569	NO	--	Major Capsid protein
33	FOR	22622	24025	1404	--	NO	Orpham	Methylcarbamoylase DNA modification
34	FOR	24105	24635	531	--	NO	Orpham	NKF
35	FOR	24645	24986	342	--	NO	Orpham	NKF
36	FOR	25076	25645	570	Longer ORF (gap 89 instead of 131), also gain 1 more hit with Hhpred	NO	--	NKF
37	FOR	25632	26186	555	TERM_3_26220-26237	NO	Orpham	NKF
38	FOR	26291	27214	924	--	NO	--	NKF	minor tail protein ? (protein with jelly roll fold similar to C1q complement component and spore surface)
39	FOR	27223	28194	972	--	NO	--	NKF
40	FOR	28199	28783	585	Chose longer orf with start 28199 (Genemark) instead of 28253 (Glimmer) despite worse score	NO	--	Head-to-tail stopper
41	FOR	28770	29225	456	--	NO	--	NKF
42	FOR	29222	29896	675	--	NO	--	NKF
43	FOR	29954	31402	1449	--	NO	--	tail sheath protein
44	FOR	31415	31885	471	--	NO	--	NKF
45	FOR	31894	32058	165	--	NO	Orpham	NKF
46	FOR	32158	32673	516	--	NO	--	tail assembly chaperone
47	FOR	32158	32990	833	Join(32158..32664,32264..32990) for -1 frameshift of tail assembly chaperone	NO	--	tail assembly chaperone	-1 frameshift in position 32661
48	FOR	32990	35143	2154	--	NO	Orpham	tape measure protein
49	FOR	35143	35772	630	--	NO	--	Minor tail protein
50	FOR	35782	35952	171	--	NO	--	NKF
51	FOR	35945	36532	588	--	NO	--	NKF
52	FOR	36533	39103	2571	--	NO	--	Minor tail protein
53	FOR	39103	39750	648	--	NO	Orpham	NKF
54	FOR	39805	40224	420	--	NO	--	baseplate wedge protein
55	FOR	40230	41975	1746	--	NO	--	baseplate J protein
56	FOR	41972	43339	1368	--	NO	--	Minor tail protein
57	FOR	43320	46577	3258		NO	--	Minor tail protein
58	REV	48575	46650	-1926	--	NO		DNA helicase
59	REV	49689	48535	-1155	--	NO	Orpham	NKF
60	REV	49910	49695	-216	added gene	NO	ND	NKF
61	FOR	50122	50343	222	--	NO	Orpham	NKF
62	FOR	50374	50751	378	--	NO	Orpham	NKF	Tad4-like Thoeris defense inhibitor
63	FOR	50744	51130	387	--	NO	Orpham	WhiB family transcription factor
64	FOR	51123	52082	960	--	NO	Orpham	DNA ligase
65	FOR	52192	52446	255	--	NO	--	NKF
66	FOR	52457	53137	681	--	NO	--	NKF
67	FOR	53144	53446	303	--	NO	--	helix-turn-helix DNA binding domain
68	FOR	53439	54056	618	--	NO	Orpham	thymidylate kinase
69	FOR	54053	54874	822	--	NO	Orpham	NKF
70	FOR	54874	55521	648	--	NO	ND	folE-like GTP cyclohydrolase I	first step in 7-Deazaguanine nucleotide modifications
71	FOR	55886	57124	1239	Could not find small orf in 364-bp gap	NO	Orpham	NFK	acyl-CoA ligase (AMP-forming); same phrog as gene 83
72	FOR	57117	58211	1095	--	NO	Orpham	NKF	pyridoxal-dependent decarboxylase
73	FOR	58211	58435	225	--	NO	Orpham	NKF
74	FOR	58428	59096	669	--	NO	Orpham	GNAT family acetyltransferase
75	FOR	59093	59746	654	--	NO	Orpham	NKF	homology with ORF 79
76	FOR	59733	60440	708	--	NO	Orpham	GNAT family acetyltransferase
77	FOR	60437	61318	882	--	NO	Orpham	NFK	Amidoligase
78	FOR	61311	61928	618	--	NO	Orpham	methyltransferase
79	FOR	61925	62632	708	--	NO	Orpham	NFK	homology with ORF 75
80	FOR	62742	63656	915	--	NO	Orpham	dpdA-like tRNA-guanine transglycosylase
81	FOR	63631	64521	891	Glimmer start chosen (longer ORF)	NO	--	exonuclease
82	FOR	64535	65332	798	--	NO	Orpham	PreQ0 pathway, queE-like
83	FOR	65515	66582	1068	--	NO	Orpham	NKF	AMP ligase to carboxylate (Cter domain missing normally involved in transfer to CoA); same phrog as gene 71
84	FOR	66590	67627	1038	Glimmer start chosen (GeneMark 66572 start leads to 11 bp overlap, with only slightly better score RBS -4,234)	NO	Orpham	NKF	acyl-CoA reductase
85	FOR	67624	68880	1257	--	NO	--	aminotransferase	(pyridoxal-dependent) aminotransferase
86	FOR	68880	69377	498	--	NO	Orpham	dUTPase
87	FOR	69433	69756	324	--	NO	--	RNA binding protein
88	FOR	69770	70168	399		NO	--	NKF
89	FOR	70168	70959	792	--	NO	--	DnaC-like helicase loader
90	FOR	70969	72213	1245	--	NO	--	DnaB-like dsDNA helicase
91	FOR	72203	73294	1092	--	NO	--	DNA primase
92	FOR	73284	73421	138	--	NO	Orpham	NKF
93	FOR	73402	73989	588	--	NO	--	chaperonin, DnaJ-like
94	FOR	74069	74923	855	--	NO	--	SSB protein
95	FOR	74979	78152	3174	--	NO	--	DnaE-like DNA polymerase III (alpha)
96	FOR	78248	79381	1134	--	NO	--	RecA-like DNA recombinase
97	FOR	79368	79865	498	Glimmer start chosen (GeneMark leads to longer overlap)	NO	Orpham	Holliday junction resolvase
98	FOR	79852	80628	777	--	NO	--	Cas4 exonuclease
99	FOR	80625	81104	480	--	NO	Orpham	RuvC-like resolvase
100	FOR	81104	81811	708	--	NO	--	NKF
101	FOR	81814	82272	459	--	NO	--	DNA Binding protein
102	FOR	82324	82566	243	--	NO	--	NKF
103	FOR	82580	83299	720	--	NO	--	helix-turn-helix DNA binding domain
104	FOR	83299	84198	900	--	NO	Orpham	NKF
105	FOR	84250	85230	981	--	NO	Orpham	NKF
106	FOR	85239	85667	429	--	NO	--	NKF
107	FOR	85667	85882	216	--	NO	Orpham	NKF
108	FOR	85863	86219	357	--	NO	--	PreQ0 pathway, queD-like
109	FOR	86229	86663	435	TERM_4_86671:86692 86229 : gap 9 et 86385 : Gap 165	YES	Orpham	membrane protein
110	FOR	86807	87262	456	start 86807: longest ORF gap 143 / start 86825: Gap 161	NO	Orpham	lipoprotein	Spannin? HHPRED just below threshold
111	FOR	87278	87592	315	--	NO	Orpham	NKF
112	FOR	87695	88102	408	--	NO	--	MazG-like nucleotide pyrophosphohydrolase
113	FOR	88104	88217	114	Decided to keep this short ORF (coding potential present)	NO	Orpham	NFK
114	FOR	88210	88503	294	--	NO	--	NKF
115	FOR	88594	88845	252	Could not lengthen the ORF	NO	Orpham	NKF
116	FOR	88848	89342	495	--	NO	Orpham	nucleotide pyrophosphohydrolase
117	FOR	89459	89932	474	--	NO	Orpham	NKF
118	FOR	89957	90370	414	--	NO	Orpham	NKF
119	FOR	90447	90677	231	--	YES	Orpham	Membrane protein
120	FOR	90656	90760	105	added gene	NO	ND	NKF
121	FOR	90781	91077	297	Shortened according to Genemark profile and to prevent overlap with gene 120 (58 bp)	NO	--	NKF
122	FOR	91233	91598	366	--	NO	--	NKF
123	FOR	91601	91666	66	added gene	NO	ND	NKF
124	FOR	91833	91982	150	--	NO	--	NKF
125	FOR	92133	93134	1002	--	NO	--	ribonucleotide reductase
126	FOR	93188	93526	339	--	YES	Orpham	Membrane protein
127	FOR	93523	94017	495	TERM_5_94037:94074	NO	Orpham	NKF
128	FOR	94221	96071	1851	--	NO	Orpham	minor tail protein	whiskers or collar protein
129	FOR	96146	96520	375	TERM_6_96607:96654 ou TERM_7_96615:96646	NO, Signal Peptide 1-25	Orpham	NKF	Protein with signal peptide
130	FOR	96714	98393	1680	--	NO	Orpham	minor tail protein	whiskers or collar protein
131	FOR	98395	98775	381	--	NO	Not Orpham because homologous to gene 132	minor tail protein	collagen like structure predicted with AlphaFold 3
132	FOR	98786	99136	351	--	NO	Not Orpham because homologous to gene 131	minor tail protein	collagen like structure predicted with AlphaFold 3
133	FOR	99191	99985	795	--	NO	--	lysin B
134	FOR	99978	101846	1869	--	NO	Orpham	minor tail protein	tail collar fiber
135	FOR	101855	102646	792	--	NO	Orpham	NKF
136	FOR	102646	103443	798	--	NO	Orpham	NKF
137	FOR	103436	104125	690	--	NO	Orpham	NKF
138	FOR	104169	105656	1488	--	NO	Orpham	lysin A
139	FOR	105656	105889	234	--	NO	--	Anti-CBASS inhibitor (Acb2)
140	FOR	105876	106370	495	--	YES 2 TMD: aa40-57 and aa65-82	Orpham	Holin

## Sheet: (b) TranscriptionTerminators
Supplementary Table 3,b. Genome annotation of bacteriophage JeanGrey. Predicted phage terminator analysis performed with PhageScope and further validation via RNA Seq profile analysis.
Phage_id	Terminator_Id	Start	Stop	Sense	Loc	Confidence	Confirmed via RNA Seq
JeanGrey	TERM_1	5621	5652	+	F	81
JeanGrey	TERM_2	22518	22539	+	F	100
JeanGrey	TERM_3	26220	26237	+	F	100
JeanGrey	TERM_4	86671	86692	+	F	86
JeanGrey	TERM_5	94037	94074	+	F	100
JeanGrey	TERM_6	96607	96654	+	F	83
JeanGrey	TERM_7	96615	96646	+	F	100
PhageScope performed on 2025-09-08

## Sheet: (c) tRNA
Supplementary Table 3,c. Genome annotation of bacteriophage JeanGrey. tRNA Sequence analysis.
trna_id	source	trnatype	start	end	strand	length	permutation	seq	phage_accid
JeanGrey-1-tRNAscanSE	tRNAscanSE	tRNA-Undet(nnn)	91705	91779	reverse	75	-	gccctagtattggcccggtcttctaaaccagaggtgcataactggacgatgtaggttcgaatcctacctagggca	JeanGrey
JeanGrey-2-tRNAscanSE	tRNAscanSE	tRNA-Undet(nnn)	92025	92095	reverse	71	-	gggagggtagttcagtcaggtagaacaggacggtcgacaccaggacgagggttcaaatccctctcctccca	JeanGrey
Aragorn did not find any tRNA (last checked on 2025-09-25 with ARAGORN v1.2.41)
