# Supplementary material
Source: Research Square preprint supplement (doi:10.21203/rs.3.rs-9446490/v1)
Supplement: Supplementary file 4 [file 6e07a18d7bd4b78ccd884df1.xlsx]

## Sheet: Tabelle1
Table S4. Oligonucleotides used in this study for cloning, sequencing, (RT)-qPCR, and EMSA studies.
Name	Sequence (5' to 3')	Description
Deletion Library CGP3
D1-fw-1	GCCTGCAGGTCGACTCTAGAGGATCCGTGATGCGCTACCAACTGC	Generation of Left (pk19 BamHI Digested) flank for Deletion D1 and D30%
D1-rv-2	CCCATCCACTAAACTTAAACAATAAAACCCCTGCAAGCAG
D1-fw-3	TGTTTAAGTTTAGTGGATGGGTTAACCTGCGTTAACAAGCTC	Generation of Right (pk19 EcoRI Digested) flank for Deletion D1
D1-rv-4	GTTGTAAAACGACGGCCAGTGAATTCGAGGTCACTATCCCAGCG
D2-fw-1	GCCTGCAGGTCGACTCTAGAGGATCCCACCATATGCTGGAATTCTGGC	Generation of Left (pk19 BamHI Digested) flank for Deletion D2
D2-rv-2	CCCATCCACTAAACTTAAACACGCCAGTGTAATGCTGG
D2-fw-3	TGTTTAAGTTTAGTGGATGGGACTGGATCTTTTGTGCGC	Generation of Right (pk19 EcoRI Digested) flank for Deletion D2
D2-rv-4	GTTGTAAAACGACGGCCAGTGAATTCCGCGTGAGCCGGCC
D3-fw-1	GCCTGCAGGTCGACTCTAGAGGATCCGAACTCCTGTTGGATAGCCATG	Generation of Left (pk19 BamHI Digested) flank for Deletion D3
D3-rv-2	CCCATCCACTAAACTTAAACATTCTAAAGGCTAAATGACAGGC
D3-fw-3	TGTTTAAGTTTAGTGGATGGGAGAAAAGAAGTACCTCATTATGGC	Generation of Right (pk19 EcoRI Digested) flank for Deletion D3
D3-rv-4	GTTGTAAAACGACGGCCAGTGAATTCTCTGCAGGATGGATGCTC
D4-fw-1	GCCTGCAGGTCGACTCTAGAGGATCCCTACTGCCGCCACTTGC	Generation of Left (pk19 BamHI Digested) flank for Deletion D4
D4-rv-2	CCCATCCACTAAACTTAAACAGGTGTGGTGGTTATCCTTC
D4-fw-3	TGTTTAAGTTTAGTGGATGGGCACTTAAGTACCTTTTATCGGTCG	Generation of Right (pk19 EcoRI Digested) flank for Deletion D4
D4-rv-4	GTTGTAAAACGACGGCCAGTGAATTCTCGGCGCCGTAGTATTC
D5-neu-fw-1	GCCTGCAGGTCGACTCTAGAGGATCCACGTCTCAGCGATCTTTACGG	Generation of Left (pk19 BamHI Digested) flank for Deletion D5
D5-neu-rv-2	CCCATCCACTAAACTTAAACACCAAAAACAAACGAATAAAAAATTACC
D5-neu-fw-3	TGTTTAAGTTTAGTGGATGGGAGCGATCTCGTGCGCCTC	Generation of Right (pk19 EcoRI Digested) flank for Deletion D5
D5-neu-rv-4	GTTGTAAAACGACGGCCAGTGAATTCGTTAGTCAAATGGCGCGAGTTC
D6-fw-1	GCCTGCAGGTCGACTCTAGAGGATCCTGTGCGCATCAAGTAAGTG	Generation of Left (pk19 BamHI Digested) flank for Deletion D6
D6-rv-2	CCCATCCACTAAACTTAAACAATGGCTTTTCTATAGATAGATGTTGAG
D6-fw-3	TGTTTAAGTTTAGTGGATGGGGTTGCTATGTTTGTGGTCGTTAAG	Generation of Right (pk19 EcoRI Digested) flank for Deletion D6
D6-rv-4	GTTGTAAAACGACGGCCAGTGAATTCACGAGAGCTGCGTGAGC
D7-fw-1	GCCTGCAGGTCGACTCTAGAGGATCCCGGGAAGCACAGCCG	Generation of Left (pk19 BamHI Digested) flank for Deletion D7
D7-rv-2	CCCATCCACTAAACTTAAACAAACCCCCAACTGCCTGTG
D7-fw-3	TGTTTAAGTTTAGTGGATGGGGTCCAAGACTTTCCCCACC	Generation of Right (pk19 EcoRI Digested) flank for Deletion D7
D7-rv-4	GTTGTAAAACGACGGCCAGTGAATTCGATCAGCGAGATTGCGTTAACAG
D8-fw-1	GCCTGCAGGTCGACTCTAGAGGATCCAAGAAACTTAATTTATTAACAACTCTTAAAAG	Generation of Left (pk19 BamHI Digested) flank for Deletion D8.1
D8-rv-2	CCCATCCACTAAACTTAAACAAAGTATACCTTAACGGTGTTTGTC
D8-fw-3	TGTTTAAGTTTAGTGGATGGGCAACCCTTAGACCCCAGAC	Generation of Right (pk19 EcoRI Digested) flank for Deletion D8.2
D8-rv-4	GTTGTAAAACGACGGCCAGTGAATTCGGGGACAGGTTTTTTCAATATC
B123_D8.1_RF_for	TGTTTAAGTTTAGTGGATGGG AGAACCACCAGCATCCTAAG	Generation of Right (pk19 EcoRI Digested) flank for Deletion D8.1 and D30%
B124_D8.1_RF_rev	GTT GTA AAA CGA CGG CCA GTG AAT TC GTCGGTCGAATACACATCTG
B125_D8.2_LF_for	GCCTGCAGGTCGACTCTAGAGGATCC GCCATGTCCATAGTCCTAAC	Generation of Left (pk19 BamHI Digested) flank for Deletion D8.2 and D70%
B126_D8.2_LF_rev	CCC ATC CAC TAA ACT TAA ACA TGC TCG GCG ATG CGA ATA AG
D9-fw-1	GCCTGCAGGTCGACTCTAGAGGATCCCAGCAGTACCAGGCCCC	Generation of Left (pk19 BamHI Digested) flank for Deletion D9
D9-rv-2	CCCATCCACTAAACTTAAACATGCTGGTTGTTATGCCGG
D9-fw-3	TGTTTAAGTTTAGTGGATGGGACCTTATTTTTCTTTGGTTAAGGGG	Generation of Right (pk19 EcoRI Digested) flank for Deletion D9
D9-rv-4	GTTGTAAAACGACGGCCAGTGAATTCTTTTTCAGCTGCTGCGTCTAC
D10-fw-1	GCCTGCAGGTCGACTCTAGAGGATCCGATACCACTGCTAACAGCAC	Generation of Left (pk19 BamHI Digested) flank for Deletion D10
D10-rv-2	CCCATCCACTAAACTTAAACACAAGGGGTGTTAGTGGTACTC
D10-fw-3	TGTTTAAGTTTAGTGGATGGGGCTCATACCTTAACCAAAGCTAAAG	Generation of Right (pk19 EcoRI Digested) flank for Deletion D10
D10-rv-4	GTTGTAAAACGACGGCCAGTGAATTCCTATGGTTCGACCTCAAGAAAATC
D11-fw-1	GCCTGCAGGTCGACTCTAGAGGATCCTACCGAAGCTGGTTGGC	Generation of Left (pk19 BamHI Digested) flank for Deletion D11
D11-rv-2	CCCATCCACTAAACTTAAACATGTTGAGCAAAAAAATAACCCCC
D11-fw-3	TGTTTAAGTTTAGTGGATGGGTTTTAAGTGTTAGCGATTAAAGCG	Generation of Right (pk19 EcoRI Digested) flank for Deletion D11
D11-rv-4	GTTGTAAAACGACGGCCAGTGAATTCGTAGTAATCCTGGCGATCTAC
D12-fw-1	GCCTGCAGGTCGACTCTAGAGGATCCATATCGTCAGTGATGTAGAGATG	Generation of Left (pk19 BamHI Digested) flank for Deletion D12
D12-rv-2	CCCATCCACTAAACTTAAACACACTTCTCAACGCTTCTATCTG
D12-fw-3	TGTTTAAGTTTAGTGGATGGGCTTAATAACTTAATAAGTTTGTCGAGAATC	Generation of Right (pk19 EcoRI Digested) flank for Deletion D12
D12-rv-4	GTTGTAAAACGACGGCCAGTGAATTCTCAAAACCAGAGGACGCC
D13-fw-1	GCCTGCAGGTCGACTCTAGAGGATCCGCAGCCTGCTTGCGCATC	Generation of Left (pk19 BamHI Digested) flank for Deletion D13
D13-rv-2	CCCATCCACTAAACTTAAACACACTTAAGATGAACATATAATCTC
D13-fw-3	TGTTTAAGTTTAGTGGATGGGATAAAGCGCTTACGCTTCG	Generation of Right (pk19 EcoRI Digested) flank for Deletion D13
D13-rv-4	GTTGTAAAACGACGGCCAGTGAATTCAGTGCTTATTCTGCCATTGC
D14-fw-1	GCCTGCAGGTCGACTCTAGAGGATCCACTTGATGCCCTCCCAGATC	Generation of Left (pk19 BamHI Digested) flank for Deletion D14
D14-rv-2	CCCATCCACTAAACTTAAACAAACAACCCCGTTTTCAGC
D14-fw-3	TGTTTAAGTTTAGTGGATGGGTGCTGAATCTTAGCCACCTG	Generation of Right (pk19 EcoRI Digested) flank for Deletion D14
D14-rv-4	GTTGTAAAACGACGGCCAGTGAATTCAAATAATAAATGTATTTAGGAATTGAAAC
D15-fw-1	GCCTGCAGGTCGACTCTAGAGGATCCGTGTGCCCTCTACATTTTTCC	Generation of Left (pk19 BamHI Digested) flank for Deletion D15
D15-rv-2	CCCATCCACTAAACTTAAACACCGCACAAAAAGCACATTC
D15-fw-3	TGTTTAAGTTTAGTGGATGGGTTTTACACGCTATTTAACGCCTTTATC	Generation of Right (pk19 EcoRI Digested) flank for Deletion D15
D15-rv-4	GTTGTAAAACGACGGCCAGTGAATTCCCTGGTCAGGCTCACTAC
D16-fw-1	GCCTGCAGGTCGACTCTAGAGGATCCCCCTTTCTTTTCCCATCGTC	Generation of Left (pk19 BamHI Digested) flank for Deletion D16
D16-rv-2	CCCATCCACTAAACTTAAACACACAATGACCGTGGAGAGG
D16-fw-3	TGTTTAAGTTTAGTGGATGGGTCTCAGAACTCATTTTTCAATCTCTTC	Generation of Right (pk19 EcoRI Digested) flank for Deletion D16
D16-rv-4	GTTGTAAAACGACGGCCAGTGAATTCAATCTGCATTTGGATAAGCTTG
D17-fw-1	GCCTGCAGGTCGACTCTAGAGGATCCTCCGTTACGCTCTTAACATGTG	Generation of Left (pk19 BamHI Digested) flank for Deletion D17
D17-rv-2	CCCATCCACTAAACTTAAACATCTTGATTTAATTGCGCCATCTG
D17-fw-3	TGTTTAAGTTTAGTGGATGGGCCCACATCATCTCTAGAAAAAGTC	Generation of Right (pk19 EcoRI Digested) flank for Deletion D17
D17-rv-4	GTTGTAAAACGACGGCCAGTGAATTCACACCGTGAGCTCAGTGAG
D18-fw-1	GCCTGCAGGTCGACTCTAGAGGATCCAACCTACACGTCACGTCAG	Generation of Left (pk19 BamHI Digested) flank for Deletion D18
D18-rv-2	CCCATCCACTAAACTTAAACAACTACCCGGTTAGCTGTCC
D18-fw-3	TGTTTAAGTTTAGTGGATGGGTGACGAAGCTCAGCTACTC	Generation of Right (pk19 EcoRI Digested) flank for Deletion D18
D18-rv-4	GTTGTAAAACGACGGCCAGTGAATTCTGAGCTAGAAGTGGATCTTATCTAC
D19-fw-1	GCCTGCAGGTCGACTCTAGAGGATCCGAGATACTCTATGCCACCTCACAG	Generation of Left (pk19 BamHI Digested) flank for Deletion D19
D19-rv-2	CCCATCCACTAAACTTAAACAATAGATAGTCTGGTTCTGTAAAGG
D19-fw-3	TGTTTAAGTTTAGTGGATGGGCAACACCATTTAGCGCGC	Generation of Right (pk19 EcoRI Digested) flank for Deletion D19
D19-rv-4	GTTGTAAAACGACGGCCAGTGAATTCTGCCTTATTGTCACAGCAGC
D20-fw-1	GCCTGCAGGTCGACTCTAGAGGATCCCTTCCGTTCTATTTCAATAGCC	Generation of Left (pk19 BamHI Digested) flank for Deletion D20
D20-rv-2	CCCATCCACTAAACTTAAACAATGTGTGGGGTAGTGGTGG
D20-fw-3	TGTTTAAGTTTAGTGGATGGGCGCGTTTTATGAAGGCACC	Generation of Right (pk19 EcoRI Digested) flank for Deletion D20 and D70%
D20-rv-4	GTTGTAAAACGACGGCCAGTGAATTCTTGGCAAAGTTCCGTATTGC
M19-M13-for	CGCCAGGGTTTTCCCAGTCAC	Sequencing of pk19 Plasmids
M20-M13-rev	AGCGGATAACAATTTCACACAGGA
D1-Seq-fw	CCGCATGCACTACTTAGAAC	Sequencing of D1 in Genomic Locus
D1-Seq-rv1	CTGTGTCCTAGCTGGGTTTG
D1-2-Seq-rv	CGGTGCTCGCTGATGATTTC	Sequencing of D2 in Genomic Locus
D2-Seq-fw	GAATCTGGGACACCATATGC
D2-3-Seq-rv	CGTGTTGCGCGAGTGGTAAG	Sequencing of D3 in Genomic Locus
D3-Seq-fw	CCATGTGCGCTGTGTATTTG
D3-4-Seq-rv	TTATGAGGTGCCTGCTCAAG	Sequencing of D4 in Genomic Locus
D4-Seq-fw	AAGGCGATTGGCTCGATGTG
D4-5-Seq-rv	CAGCTTCGCTGTCATTTGTC	Sequencing of D5 in Genomic Locus
D5-Seq-fw	TGCGTCAACATCAACCACTG
D5-6-Seq-rv	CTGTGGATGTGCGGCAACTC	Sequencing of D6 in Genomic Locus
D6-Seq-fw	AACAGACGTGGACTGCAGAG
D6-7-Seq-rv	CACGGTTGGTTGCTTAAAGG	Sequencing of D7 in Genomic Locus
D7-Seq-fw	TGAGTACGCCTGTGGTATGC
D7-8-Seq-rv	GAATGAGTGTCTGCGCTGAG	Sequencing of D8.1 and D8.2 in Genomic Locus
D8-Seq-fw	AACCGGAGAGGAGGGTGAAG
D8-9-Seq-rv	GGCCCAAGTGATTGATAAGC	Sequencing of D9 in Genomic Locus
D9-Seq-fw	AGGCGCAGCCTCAGTATCAG
D9-10-Seq-rv	GAGTCGTCGTCAGAATTGAG	Sequencing of D10 in Genomic Locus
D10-Seq-fw	ATCGCATCCTTGCTGATGTG
D10-11-Seq-rv	GACAAACCGCGACACCCAAG	Sequencing of D11 in Genomic Locus
D11-Seq-fw	GATACCGCAAAGCAAATCCC
B493_D12Seq_rev	TCCGACTCAAATCCCAGAAG	Sequencing of D12 in Genomic Locus
D12-Seq-fw	GTCGCTCACCTGACCAATCC
D13-Seq-fw	TGTAGAGCGTGACCTTACCC	Sequencing of D13 in Genomic Locus
D13-14-Seq-rv	GTCACTGGTGCTGGTATTGG
D14-Seq-fw	GACGCAAGGACGCGATATAG	Sequencing of D14 in Genomic Locus
B492_D14Seq_rev	TTCACTGCACGTCCATAGAG
D15-Seq-fw	GACATATTGGCGGGAACAGC	Sequencing of D15 in Genomic Locus
D15-16-Seq-rv	GCAGCGGTGTCAGTGCTAAG
D16-seq-fw	AGGCGGGAATCATTTCACTC	Sequencing of D16 in Genomic Locus
B491_D16Seq_rev	ATCGGAGCGACTCCTCAATC
D17-Seq-fw	GTGGGCTTGCAACATCTTAC	Sequencing of D17 in Genomic Locus
D17-18-Seq-rv	CCGATACCTGTGCTTCATAG
D18-Seq-fw	AAGCACGGTCACTACGACAG	Sequencing of D18 in Genomic Locus
D18-19-Seq-rv	ACCATGTGGGTTGCCTATTG
B489_D19Seq_rev	GGCGTAACTGCCTTATTGTC	Sequencing of D19 in Genomic Locus
D19-20-Seq-rv	GCACAAGGGTGTGCTTTATG
D20-Seq-fw	CTACCGTTACAGCAGCTCAG	Sequencing of D20 in Genomic Locus
B488_D20Seq_rev	ACGCCATTGCCATGAAACCC
Generation of EMSA Fragments
B171_JG1_for	TCGCTACGACGATAACCTAC	Generation of Fragment A
B172_JG1_rev	CTACTGCGTGAACGTTAGAC
B173_JG23_for	ACAGAGACCGCCTTAACTAC	Generation of Fragment S1
B174_JG23_rev	CTTCGTGATCATCGGCTAAC
B179_JG64_for	CACGACACCCTCAGTTCATC	Generation of Fragment B
B180_JG64_rev	CTGGACCTCTTCCTGAAATC
B181_JG83_for	AAAGGGCGAGTCGTTCGATG	Generation of Fragment C
B182_JG83_rev	GCTCAACTTCGACTCCTTACTG
B183_JG110_for	ACAAGAGTCGACGAAGGAAG	Generation of Fragment S2
B184_JG110_rev	GTGAGCCCGCTAACACTATC
B189_JG121_for	CAGAACTTTGGCGAGAAGTC	Generation of Fragment D
B190_JG121_rev	TCAGCTTAACGGCCACTTTG
B191_EMSA_cgps_for	ATTGGTGATGCGCTCATGTG	Generation of Fragment +Control cgpS; Also used for sequencing of D8.2
B192_EMSA_cgps_rev	TCGCTGTAGGTATTGGTGTC
B193_EMSA_gntK_for	CCAGGAAGTATCCGCTCCAC	Generation of Fragment -Control gntK; Also used for sequencing of D8.1
B194_EMSA_gntK_rev	CCAGAAACGCCCATGACGAC
ChAP-qPCR Confirmation Primers
B456_ddhCHAP_for	TGTATTCCACGGTGTGGTTG	qPCR for genomic target ddh
B457_ddhCHAP_rev	GACGAAGCAACCTTCGACTC
B458_JG121CH_for	GGTCTTCCAGCCTTAAAACCA	qPCR for plasmid target D
B459_JG121CH_rev	CACCCCGGTGAACAGCT
B460_JG64CH_for	GATCCGTGTGACGGCTATG	qPCR for plasmid target B
B461_JG64CH_rev	GAC TAC ACT CTG TAA CCG CC
B462_cgpSCH_for	CTTCTTTCATCAAGCCTTTTCTTC	qPCR for genomic target cgpS
B463_cgpSCH_rev	GACCAATAAGAGTCGATTAGATTGC
Generation of CgpS Localization Plasmid
B330_Pcgps_Loc_for	CGAGGGCGATCAGCGACGCCGCAGGGGGATCC GAA TAA GCA CTT TAA AAG TCA C	Fragment of PcgpS:cgpS without STOP codon and with Gibson Overhangs for pJC1 and Linker
B331_cgps_Loc_rev	GCC GCC GCC GCC TGA GCC GCC GCC GCC TTC GAA AGG AAT GCC TTC TTT T
B332_flexLink_loc_for	GGC GGC GGC GGC TCA GGC	Fragment of Flexible Linker for Gibson
B333_flexLink_loc_rev	TGA GCC GCC GCC GCC TGA G
B334_mvenus_loc_for	GGCGGCGGCGGCTCAGGCGGCGGCGGCTCA ATG GTG AGC AAG GGC GAG G	Fragment of mvenus with Gibson Overhangs for pJC1 and Linker
B335_mvenus_loc_rev	GCA ACG TTG TTG CCA TTG CTG CAG GTC GAC CTA GTT ACT TGT ACA GCT CGT C
R12-pJC1-MCS-for	CAGCGACAAGCCACCCGCACA	Sequencing Primers of all pJC1-based plasmids
R13-pJC1-MCS-rev	GGAAGCTAGAGTAAGTAGTTCGC
Generation of Overexpression plasmid of cgpS
B195_pAN6-cgps_for	GCATGCCTGCAGAAGGAGATATACAT ATGGACATGGCCATTATTCAGT	Generation of cgpS Fragment with overhangs to pAN6 Vector
B196_pAN6-cgps_rev	TAC TTC TCG AAC TGT GGG TGG GAC CAG CTA GC TTC GAA AGG AAT GCC TTC TTT TTC
pEKEx2_pAN_fw	CGGCGTTTCACTTCTGAGTTCGGC	Sequencing Primers of all pAN6-based plasmids
pEKEx2_pAN_rev	GATATGACCATGATTACGCCAAGC
Generation of Promoter Reporter Constructs
B320_JG121Prom_for	CGATCAGCGACGCCGCAGGGGGATCCTGG CGA GAA GTC TAA AAG TAG	Generation of reporter construct with Promoter exchange of plasmid 2307 (cut BamHI NdeI) for Region D
B321_JG121Prom_rev	AAC AGC TCC TCG CCC TTG CTC ACC ATA TGA TAT C CAT TCA GCT TAA CGG CCA C
B322_JG64Prom_for	CGATCAGCGACGCCGCAGGGGGATCC GTG TGA CGG CTA TGA ATT TAG	Generation of reporter construct with Promoter exchange of plasmid 2307 (cut BamHI NdeI) for Region B
B323_JG64Prom_rev	AAC AGC TCC TCG CCC TTG CTC ACC ATA TGA TAT C TCT TCT GGA CCT CTT CCT G
RT-qPCR Various
B197_qPCRJG1_for	GTC CGG TGT TGA AAA GAA GC	qPCR Primers to measure intracellular phage DNA
B198_qPCRJG1_rev	ACC GGG TTC TAG TGG GTC TT
B146_qPCR_CgpS_fw1	CGATATGATCACGCTCAAAGA	RTqPCR Primers to measure cgpS transcript levels in the cell
B148_qPCR_CgpS_rev2	ATTTCCTGTGGCACGATACC
B121_qPCR_ddh_fw	CAACCACACCGTGGAATACA	Control Primers for qPCR and RT-qPCR for ddh
B122_qPCR_ddh_rev	TTCTCTGGGGAGAGCAGGTA
