# Supplementary material
Source: Research Square preprint supplement (doi:10.21203/rs.3.rs-9446490/v1)
Supplement: Supplementary file 5 [file 7cc56f4d3c5d0c9081495cf2.xlsx]

## Sheet: (a) Overview
Supplementary Table 7,a. RNA-seq analysis across all targets and time points. Sample overview including strain background and infection conditions
		+Phage						-Phage
		15		30		60		15		30		60
Cell Background Strain	+CGP3	B3_R1_001	B4_R1_001	B7_R1_001	B15_R1_001	B11_R1_001	B12_R1_001	B5_R1_001	B6_R1_001	B8_R1_001	B16_R1_001	B13_R1_001	B14_R1_001
	-CGP3	B1_R1_001	B2_R1_001			B9_R1_001	B10_R1_001

## Sheet: (b) T15 -CGP3 Log2
Supplementary Table 7,b. RNA-seq analysis across all targets and time points. Log₂ fold changes for −CGP3 cells under infection at 15 min post infection.Differential expression values were filtered using the following criteria: maximum group mean > 10, false discovery rate (FDR) < 0.05, and log₂ fold change > 1 (overexpression) and log₂ fold change < 1 (reductions).
Name	Region	Log₂ fold change	FDR p-value		Name	Region	Log₂ fold change	FDR p-value
cg2320	complement(2202045..2202488)	1.18994	0.0460097		atpC	1280619..1280993	-1.29924	0.0428977
cg2360	complement(2246142..2246360)	1.03484	0.0456395		cg2938	2795684..2796649	-1.13035	0.0334345
uraA	complement(2017366..2018655)	1.02693	0.028704		ggtB	complement(1013264..1014967)	-1.12796	0.0316993
cg0105	complement(85096..85404)	1.20873	0.0249987		cg3233	complement(3097645..3098193)	-1.02508	0.030161
ftsE	845968..846657	1.19882	0.0245117		cg3192	3055869..3057269	-1.12305	0.0297891
cg1255	1152654..1153841	1.07794	0.0229248		cg2478	complement(2362856..2363665)	-1.22768	0.0285493
cg1044	971490..971822	1.10446	0.0227693		cg0830	complement(744301..744525)	-1.05329	0.0180807
cg0606	complement(538377..538646)	1.14872	0.0215178		cg1604	1493614..1494579	-1.42533	0.0157782
JeanGrey_28	16437..16595	9.69149	0.0198332		cg3274	complement(3134027..3134245)	-1.0193	0.0148501
cg2089	complement(1979325..1979618)	1.20121	0.0192159		whiB1	complement(807005..807265)	-1.00132	0.013826
cg0635	complement(558196..558519)	1.07256	0.0175982		cg2165	2052177..2052866	-1.00209	0.0127606
manA	787116..788300	1.25425	0.0142284		cg1383	1293167..1294048	-1.34849	0.0121842
cg1033	963126..963722	1.13517	0.0142065		cg2131	complement(2023655..2024332)	-1.09377	0.0121842
cg1171	1085849..1086934	1.06033	0.0137554		rmpA	complement(3215184..3215996)	-1.22188	0.0112893
lmrB	complement(2830918..2832363)	1.13591	0.0135417		cg1277	1172161..1172658	-1.36889	0.0110609
cg1244	complement(1142366..1142713)	1.15471	0.012691		cg1118	1041466..1041798	-1.30539	0.0103417
JeanGrey_24	11878..12306	10.3265	0.0120973		cg0365	317893..318468	-1.21031	0.00963637
JeanGrey_21	10812..10976	10.7479	0.00872647		pgp2	2346217..2346873	-1.00947	0.009361
cg2439	complement(2326849..2327064)	1.69797	0.00816331		cg3001	2853852..2854298	-1.05658	0.00932632
JeanGrey_23	11436..11876	10.9599	0.00735403		cg0852	complement(783632..784090)	-1.37543	0.00790558
cg3322	complement(3168514..3170376)	1.11315	0.00695993		ufaA	1546443..1547759	-1.01828	0.00612564
cg2747	2621266..2621841	1.12001	0.00615825		cg0198	169997..170920	-1.11954	0.00605765
cg2348	2231721..2232725	1.22451	0.00560358		cg0238	complement(209990..211456)	-1.19281	0.00532852
rplT	1450112..1450495	1.21515	0.00497652		cg2519	complement(2398448..2399128)	-1.60736	0.00525669
JeanGrey_22	11036..11455	11.6479	0.0039694		cg1603	1492411..1493604	-1.61177	0.00491308
ftsX	846671..847573	1.52668	0.00366761		cg1485	1380470..1381036	-1.11363	0.00481974
cg2088	complement(1978921..1979130)	1.44976	0.00289912		cg2952	complement(2808589..2809278)	-1.1798	0.00430707
rpmB	complement(926368..926604)	1.06744	0.0028661		idhA1	3237450..3238457	-1.08853	0.00427318
tnp1b(ISCg1b)	complement(2595722..2597032)	1.16068	0.00231737		cg0780	694501..695586	-1.46372	0.00421778
nrdH	complement(2652090..2652323)	1.04929	0.00229452		cg0963	898894..899163	-1.05607	0.00415023
JeanGrey_124	91833..91982	12.4233	0.00188867		cg1291	1192555..1193013	-1.01651	0.00405593
JeanGrey_29	16745..18226	12.4183	0.00184639		dnaK	complement(2957847..2959703)	-1.02881	0.00383679
JeanGrey_128	94221..96071	12.4516	0.00178245		pmmB	complement(701854..703446)	-1.0576	0.00233263
cg0499	441219..441593	1.50032	0.00129821		cg0845	complement(775620..778508)	-1.04956	0.00227401
JeanGrey_9	5919..6149	12.7931	0.00122235		tnp3b(ISCg3b)	1647128..1647838	-2.09293	0.00224135
cg2651	2532791..2533042	2.21211	0.00105743		cg3203	3069618..3070733	-1.04982	0.00211209
JeanGrey_101	81814..82272	12.9508	0.00104787		cg1392	complement(1301610..1301837)	-1.73696	0.00181869
cg1110	1035448..1036212	1.05176	0.00103776		cg2118	2011777..2012571	-1.44189	0.00161109
JeanGrey_16	8608..8763	13.0019	0.00102493		gluB	2030669..2031556	-1.43747	0.00129192
cg0394	complement(340567..341277)	1.08571	0.000784973		cg2080	1971537..1972163	-2.11861	0.00102547
cg1717	complement(1606294..1606728)	1.15504	0.000666835		cg1484	complement(1379930..1380409)	-1.55522	0.000827146
cg0168	complement(145516..146340)	1.18384	0.000642489		eno	1036419..1037696	-1.25322	0.000807743
pitA	complement(481390..482667)	1.39911	0.000599902		cg0212	184078..185091	-1.75096	0.000778913
cg1833	1724339..1725298	1.0116	0.000567029		cg3292	3146931..3147167	-1.47749	0.000544128
cg1095	1017539..1018033	1.4616	0.000542073		cg0530	471598..471849	-1.2463	0.000505366
cg0244	214122..214526	1.0024	0.00051653		cg0757	671946..672149	-1.36556	0.000450879
cg0472	complement(417541..418299)	1.1573	0.000482855		mcmB	complement(1613698..1615911)	-1.08364	0.000444973
JeanGrey_99	80625..81104	13.7505	0.000461127		cg2565	2448174..2449172	-1.07368	0.00039583
JeanGrey_102	82324..82566	13.7808	0.000450596		cg3164	3020539..3021357	-1.01538	0.00032853
cg1444	1346402..1346890	1.52395	0.000444973		ctpA	complement(407707..409974)	-1.12215	0.00028352
cg2191	complement(2082764..2083684)	1.42624	0.000444973		cg1486	complement(1381019..1381726)	-1.25891	0.00026891
cg2362	complement(2248022..2248309)	1.19709	0.000377424		cg0999	933176..933763	-1.0468	0.000208178
cg1053	complement(979267..979848)	1.16293	0.000333847		cg0316	complement(277984..278277)	-1.66715	0.000197871
JeanGrey_100	81104..81811	14.1564	0.00032028		thiM	complement(1543583..1544389)	-1.96627	0.000187952
cg1304	1208842..1209609	1.64023	0.000272629		ldh	complement(3085753..3086697)	-1.93736	0.000174304
cg3102	complement(2961517..2962152)	1.45373	0.000271		sseA2	1503177..1504046	-1.11576	0.000174304
JeanGrey_103	82580..83299	14.4005	0.00022293		mog	1255617..1256105	-1.75047	0.000158496
JeanGrey_107	85667..85882	14.4378	0.000214356		moaA	complement(1263153..1264361)	-1.81308	0.000152743
cg2893	2752274..2753758	1.15693	0.000205631		dapE	1157199..1158308	-1.04774	0.000134914
JeanGrey_93	73402..73989	14.6803	0.00016839		msiK1	complement(2581184..2582314)	-1.46548	0.000118159
cg1542	complement(1429268..1429516)	1.88091	0.000159073		cg0046	32699..33460	-1.14577	0.00010148
cg1735	complement(1624491..1626305)	1.01139	0.000159073		cg2380	complement(2268182..2268571)	-1.16316	8.81931e-05
cg1398	1306400..1307392	1.02001	0.00015889		cg2939	2796650..2798653	-1.32699	8.21882e-05
JeanGrey_104	83299..84198	14.7619	0.000149408		ptsH	2015811..2016080	-1.14435	8.16235e-05
JeanGrey_8	5678..5929	14.8166	0.000140124		ribG	complement(1693740..1694726)	-1.02577	8.01605e-05
JeanGrey_26	13907..14257	14.8705	0.00013156		cg2707	complement(2579857..2581101)	-1.0818	6.99521e-05
cg0245	214528..215163	1.22413	0.000129693		cg2520	complement(2399479..2399859)	-1.13082	6.92251e-05
JeanGrey_87	69433..69756	15.1586	9.00497e-05		cg0867	796921..797586	-1.58909	5.81606e-05
cg2124	complement(2016760..2017344)	1.14689	6.74312e-05		cg0207	179690..180715	-1.05682	5.29262e-05
JeanGrey_13	7975..8169	15.4138	6.74312e-05		cg2748	2622115..2622579	-1.63455	5.08294e-05
JeanGrey_97	79368..79865	15.428	6.68784e-05		cg3138	2997685..2998662	-1.353	3.749e-05
JeanGrey_98	79852..80628	15.4341	6.63707e-05		uppS1	1049204..1049974	-1.32764	3.63171e-05
cmt3	977756..979207	1.03187	6.57546e-05		pfkA	1316523..1317554	-1.14069	3.42158e-05
rnhB	complement(2116613..2117281)	1.5216	6.20933e-05		ftn	2646478..2646966	-1.49171	3.26121e-05
cg2859	complement(2720988..2721365)	2.36621	5.42857e-05		idhA2	3238492..3239577	-1.32905	3.15595e-05
JeanGrey_20	10459..10809	15.8487	3.89729e-05		thtR	complement(722017..722922)	-1.1327	2.49258e-05
JeanGrey_86	68880..69377	15.9236	3.55858e-05		cg0538	complement(478985..479302)	-1.9251	1.86406e-05
JeanGrey_61	50122..50343	15.9764	3.35804e-05		cg0242	212726..213661	-1.18492	1.81693e-05
JeanGrey_108	85863..86219	15.9742	3.34378e-05		nadE	2653220..2654053	-1.13152	1.76045e-05
JeanGrey_88	69770..70168	15.9732	3.34378e-05		cg0844	complement(771017..775615)	-1.01556	1.61331e-05
cg2351	2235041..2235334	1.24887	3.04674e-05		cg2701	complement(2575617..2576258)	-1.09324	1.31806e-05
JeanGrey_111	87278..87592	16.0694	3.04261e-05		cg2686	2561241..2561981	-1.22677	1.29486e-05
JeanGrey_58	complement(46650..48575)	16.1122	2.91542e-05		narJ	complement(1247973..1248659)	-1.27004	1.19467e-05
JeanGrey_3	2777..3004	16.1861	2.63935e-05		cg1646	1534508..1535251	-1.19951	1.04563e-05
JeanGrey_78	61311..61928	16.2239	2.53039e-05		fdxA	complement(3134391..3134714)	-1.44649	9.37927e-06
JeanGrey_59	complement(48535..49689)	16.2657	2.50404e-05		gidB	complement(3279169..3279798)	-1.03348	9.01205e-06
cg1836	complement(1726925..1728094)	1.0233	2.49258e-05		cg1195	1101429..1103126	-1.2976	8.67795e-06
JeanGrey_35	24645..24986	16.2818	2.44912e-05		narH	complement(1248664..1250259)	-1.21219	4.17078e-06
cg3135	complement(2994511..2995299)	1.14904	2.37984e-05		cg2902	complement(2761893..2762708)	-1.28529	3.99503e-06
cg0847	complement(778628..780184)	1.14016	2.37657e-05		cg2601	2482722..2483102	-1.20463	3.99415e-06
JeanGrey_17	8765..9097	16.3605	2.2688e-05		cg0264	230675..230932	-1.32869	3.28348e-06
cg0544	complement(481127..481390)	1.7796	2.23664e-05		cg3402	3256488..3256694	-1.99811	2.82137e-06
JeanGrey_67	53144..53446	16.4026	2.23664e-05		serS	complement(3067382..3068680)	-1.26557	2.66862e-06
JeanGrey_106	85239..85667	16.4217	2.15143e-05		cg3317	3164661..3165158	-1.19938	2.50603e-06
JeanGrey_89	70168..70959	16.5206	1.9073e-05		glpQ1	complement(3080255..3081016)	-1.38461	2.35136e-06
JeanGrey_62	50374..50751	16.5454	1.86406e-05		ftsY	complement(2143806..2145536)	-1.21012	2.30336e-06
JeanGrey_115	88594..88845	16.5751	1.80179e-05		dnaB	complement(3154641..3156173)	-1.16643	2.19359e-06
JeanGrey_79	61925..62632	16.6014	1.80179e-05		pvdS1	972334..973296	-1.1562	2.18521e-06
JeanGrey_63	50744..51130	16.6341	1.66053e-05		whiB2	783037..783351	-1.37418	1.49996e-06
JeanGrey_90	70969..72213	16.7635	1.37063e-05		msrA	complement(3098799..3099452)	-1.29469	1.1536e-06
JeanGrey_112	87695..88102	16.7891	1.31919e-05		trpP	3205904..3206416	-1.23354	1.09305e-06
JeanGrey_15	8279..8611	16.8603	1.20573e-05		cg0188	complement(161361..162275)	-1.65791	1.06053e-06
JeanGrey_96	78248..79381	16.9066	1.13537e-05		dadA	complement(3187239..3188471)	-1.51955	1.05042e-06
JeanGrey_77	60437..61318	16.9039	1.1347e-05		cg3367	3216153..3217070	-2.09476	7.99707e-07
cg1287	complement(1186683..1187156)	1.72606	1.06458e-05		cg0704	623178..623621	-1.5348	4.64565e-07
JeanGrey_121	90781..91077	17.0129	1.02586e-05		rmpC	complement(3213618..3215159)	-1.75027	3.80111e-07
JeanGrey_18	9097..9705	17.0374	9.90874e-06		cg3264	complement(3127198..3128073)	-1.5609	3.46318e-07
JeanGrey_37	25632..26186	17.0306	9.87001e-06		cg1279	complement(1173334..1173867)	-1.6512	2.4166e-07
JeanGrey_126	93188..93526	17.0594	9.75675e-06		cg3267	complement(3129610..3130530)	-1.64563	2.33381e-07
JeanGrey_109	86229..86663	17.0744	9.73229e-06		cg3254	complement(3115013..3115276)	-1.34909	1.50141e-07
JeanGrey_74	58428..59096	17.108	9.20736e-06		cg1635	complement(1523896..1524408)	-1.52323	1.39075e-07
JeanGrey_119	90447..90677	17.1934	8.69051e-06		cg1125	complement(1045944..1046282)	-1.45856	6.45346e-08
cg2072	complement(1965828..1966136)	2.54439	8.5131e-06		cg1647	1535248..1535991	-1.36264	5.55017e-08
cg0924	852821..853837	1.26388	8.20985e-06		narG	complement(1250259..1254005)	-1.37791	1.66861e-08
JeanGrey_116	88848..89342	17.267	7.58795e-06		gabT	501576..502922	-1.61745	1.47958e-08
JeanGrey_19	9759..10466	17.3813	6.5644e-06		cg0175	complement(150964..151455)	-1.3972	1.29316e-08
JeanGrey_33	22622..24025	17.387	6.50409e-06		cg3272	complement(3132385..3133107)	-1.97647	4.35546e-09
JeanGrey_27	14251..16443	17.4253	6.3381e-06		fda	complement(2927544..2928578)	-1.48167	6.73994e-10
JeanGrey_36	25076..25645	17.4687	5.84584e-06		cg1045	971888..972211	-1.63024	6.64498e-10
JeanGrey_76	59733..60440	17.5021	5.5866e-06		gabD2	502924..504285	-1.59043	2.27456e-10
cg1417	1322944..1323582	1.8542	4.43443e-06		cg3303	complement(3153855..3154433)	-1.55654	1.40634e-10
JeanGrey_110	86807..87262	17.8512	3.28348e-06		cg0537	complement(478088..478972)	-2.32455	5.23517e-11
JeanGrey_64	51123..52082	17.9031	3.19525e-06		cg1447	1346935..1347909	-1.89071	3.27476e-12
JeanGrey_82	64535..65332	17.9159	3.12861e-06		dps	complement(3174564..3175061)	-2.10626	1.25657e-12
JeanGrey_68	53439..54056	17.9294	3.03833e-06		cg0568	504324..505571	-1.69591	8.36034e-13
JeanGrey_7	4957..5592	17.9303	3.03833e-06		pgi	complement(909227..910849)	-1.80062	1.96927e-13
JeanGrey_66	52457..53137	18.0279	2.67794e-06		lexA	2006798..2007559	-2.4485	3.23507e-14
cg2145	complement(2035440..2035676)	3.82499	2.40813e-06		cg1328	1234071..1234307	-2.04914	1.97766e-14
cg1360	1272720..1273169	1.3416	2.18521e-06		hmp	complement(2999445..3000605)	-7.53534	0
cg1305	complement(1209677..1211083)	1.31935	1.78055e-06		cg3242	3103092..3104705	-4.24398	0
JeanGrey_127	93523..94017	18.3832	1.71506e-06		uspA3	complement(3115758..3116663)	-3.22775	0
JeanGrey_5	4112..4678	18.3483	1.71506e-06		cg3202	3068797..3069597	-3.19433	0
JeanGrey_12	7218..7916	18.3857	1.68301e-06		cg2793	complement(2654050..2654799)	-3.13626	0
JeanGrey_84	66590..67627	18.6137	1.15101e-06		cg2962	complement(2816737..2817030)	-3.10406	0
JeanGrey_83	65515..66582	18.7028	1.04491e-06		cg0569	505697..507649	-2.80578	0
metX	complement(666641..667774)	1.40168	1.04491e-06		cg1327	1233198..1233950	-2.65424	0
JeanGrey_72	57117..58211	18.7481	1.01406e-06		narK	complement(1254022..1255359)	-2.55253	0
JeanGrey_4	3004..3936	18.9217	7.42287e-07		cg2794	complement(2654802..2655215)	-2.49485	0
JeanGrey_80	62742..63656	18.9631	7.11904e-07		mdh	complement(2493938..2494924)	-2.32814	0
cg0772	686723..687856	1.71286	4.87634e-07		modA	complement(229709..230515)	-2.18501	0
JeanGrey_125	92133..93134	19.3312	3.92954e-07		cg0683	602812..604413	-2.15007	0
ccpA1	complement(1433039..1434079)	2.56574	3.58358e-07		cg2425	2316103..2317722	-2.04231	0
cg1615	1504746..1505708	1.29249	2.42719e-07
ppiB	1751563..1752405	1.49071	1.3349e-07
cg0455	401149..402798	1.72629	9.12645e-08
gapX	994644..996086	1.65394	5.2333e-08
cg2438	2326855..2327073	2.32573	2.22146e-09
cg2336	2216424..2216927	1.44293	1.35936e-09
cg0936	complement(869271..869852)	1.53576	6.86283e-10
cg2851	complement(2713304..2714209)	1.69127	5.23631e-10
gntP	3081438..3082829	2.09638	9.76066e-11
cg2911	2770174..2771118	2.52584	2.0903e-12
cg1410	1317806..1318915	4.85232	0
cg1411	1318902..1320476	4.04536	0
cg1412	1320473..1321447	3.48159	0
cg1413	1321469..1322413	3.2877	0
cg1414	1322420..1322791	3.52139	0
cg1545	complement(1430658..1432109)	3.22228	0
cg1745	complement(1637708..1638184)	3.43032	0
cg2402	complement(2291637..2292266)	2.28348	0
cg3022	2882539..2883099	2.54718	0
iunH3	complement(1429688..1430626)	3.65641	0
JeanGrey_10	6249..6560	14.473	0
JeanGrey_105	84250..85230	14.7692	0
JeanGrey_11	6643..7221	15.7526	0
JeanGrey_114	88210..88503	13.8819	0
JeanGrey_117	89459..89932	14.5238	0
JeanGrey_118	89957..90370	13.6768	0
JeanGrey_122	91233..91598	14.9715	0
JeanGrey_2	2186..2725	15.5926	0
JeanGrey_25	12411..13904	15.1235	0
JeanGrey_34	24105..24635	14.3958	0
JeanGrey_6	4686..4949	13.9382	0
JeanGrey_65	52192..52446	14.3279	0
JeanGrey_69	54053..54874	14.6723	0
JeanGrey_70	54874..55521	15.1876	0
JeanGrey_71	55886..57124	16.8031	0
JeanGrey_73	58211..58435	12.1437	0
JeanGrey_75	59093..59746	13.641	0
JeanGrey_81	63631..64521	13.9555	0
JeanGrey_85	67624..68880	14.7732	0
JeanGrey_91	72203..73294	12.8125	0
JeanGrey_94	74069..74923	15.3266	0
JeanGrey_95	74979..78152	15.507	0
prpB2	674129..675052	3.86224	0
prpC2	675081..676232	3.5277	0
prpD2	672615..674129	4.02566	0
rbsK1	complement(1432123..1433046)	3.13444	0

## Sheet: (c) T60 -CGP3 Log2
Supplementary Table 7,c. RNA-seq analysis across all targets and time points. Log₂ fold changes for −CGP3 cells under infection at 60 min post infection.Differential expression values were filtered using the following criteria: maximum group mean > 10, false discovery rate (FDR) < 0.05, and log₂ fold change > 1 (overexpression) and log₂ fold change < 1 (reductions).
Name	Region	Max group mean	Log₂ fold change	FDR p-value		Name	Region	Max group mean	Log₂ fold change	FDR p-value
cg1325	1232087..1232302	94.4775	1.15517	0.0148426		cg0660	complement(580917..581222)	10.0897	-1.01378	0.0474132
tnp1c(ISCg1c)	611123..612433	10.0503	1.00817	0.00139836		porC	complement(1034227..1034598)	98.5589	-1.26581	0.0115023
cg0027	19705..20076	14.1464	1.06913	0.000855543		cg0222	189921..190325	12.1714	-1.04163	0.00609543
cg1745	complement(1637708..1638184)	15.3279	1.02542	0.00021962		cg3260	complement(3124673..3124882)	2904.75	-1.06723	0.00231463
cg1033	963126..963722	14.6969	1.12732	7.97156e-05		cg1392	complement(1301610..1301837)	32.9113	-1.04127	0.00204241
cg3338	complement(3185209..3185820)	19.5027	1.03392	4.83721e-05		cg2480	complement(2364251..2364814)	12.334	-1.0132	0.00174476
cg1241	1140825..1141088	73.294	1.09611	2.54715e-05		cg2957	complement(2814064..2814249)	31.403	-1.09376	0.000941028
cg0924	852821..853837	389.523	1.21319	2.2654e-05		cg0752	complement(663840..665222)	216.469	-1.21888	0.000446734
cg3117	complement(2976538..2976786)	15.3303	1.73774	1.90321e-05		tnp2c(ISCg2c)	complement(2716287..2717801)	20.0678	-1.42382	0.00016271
cg1884	complement(1775926..1776540)	389.142	1.04074	1.54081e-05		cg3402	3256488..3256694	42.4833	-1.04431	0.000161027
cg1638	complement(1526032..1526925)	25.3252	1.01202	5.69607e-06		cg1746	1638548..1639912	22.7055	-12.3394	0.000105443
cg1542	complement(1429268..1429516)	15.0233	1.72013	5.4635e-06		cg0955	complement(886017..886859)	47.469	-1.93681	5.71595e-05
cg3127	complement(2985111..2986115)	12.2737	1.16572	5.31054e-06		cg2540	complement(2421995..2422519)	26.8766	-1.02879	4.65124e-05
cg2557	complement(2437711..2438685)	13.0187	1.17787	2.75672e-06		cg1419	1325001..1326008	123.616	-1.1419	4.38124e-05
cg2390	2277987..2279297	16.6983	1.0944	2.49221e-06		cg0907	840792..841106	35.9934	-1.16179	3.10643e-05
mqo	complement(2083911..2085413)	619.381	1.04726	1.83345e-06		cg2493	2376198..2376524	22.9114	-1.33656	2.79292e-05
cg2556	2436020..2437447	17.1575	1.1498	1.35418e-06		cg0177	152441..152818	70.0444	-1.01547	1.65558e-05
ispD	complement(2801685..2802455)	114.175	1.00187	1.14735e-06		pta	complement(2909813..2911198)	38.0297	-1.07138	9.26098e-06
vanB	2497909..2498886	15.9169	1.05253	9.29677e-07		cg1418	1323861..1324877	115.92	-1.21195	7.73089e-06
cg1668	complement(1556355..1556546)	52.8711	1.245	7.83777e-07		cg2772	complement(2634554..2634928)	90.2731	-1.10101	7.5212e-06
cg0625	complement(552944..554128)	642.314	1.15242	7.4737e-07		cg3233	complement(3097645..3098193)	31.6275	-1.25068	5.81622e-06
proP	complement(3245868..3247382)	34.7462	1.2105	5.74629e-07		cg3212	3077233..3077562	169.482	-1.03229	5.61106e-06
catA3	complement(3229776..3230681)	46.9061	1.19525	5.50436e-07		cg2960	2815802..2816545	24.1272	-1.16464	4.96175e-06
cg0611	541107..542081	12.2858	1.16206	5.49847e-07		cg0272	complement(235449..236213)	22.206	-1.10674	4.94341e-06
cg2860	2721403..2722422	354.151	1.03751	4.62157e-07		cg3267	complement(3129610..3130530)	40.7079	-1.13037	4.90281e-06
groES	610349..610648	2678.55	1.07875	3.58827e-07		cg2183	2072992..2074026	292.335	-1.0298	3.76502e-06
cg1846	1742782..1743378	10.4237	1.40209	3.2582e-07		galU2	389249..390172	300.685	-1.04078	2.3218e-06
cg0026	complement(18733..19479)	42.5214	1.31326	2.07212e-07		cg1112	1037786..1038328	77.9046	-1.07662	2.12455e-06
cg0607	complement(538714..539412)	47.1926	1.32356	1.29621e-07		cg1483	complement(1379130..1379882)	22.1975	-1.17441	1.91879e-06
cg1700	complement(1588276..1588971)	78.899	1.07149	1.25221e-07		cg1106	1033442..1033654	100.057	-1.27048	1.06131e-06
cg1389	complement(1299807..1300121)	42.8318	1.26698	1.01201e-07		cg0134	114094..115482	73.0205	-1.08148	9.32488e-07
cg1218	complement(1120552..1121196)	20.1665	1.35556	6.82701e-08		dnaQ2	1359087..1359680	119.864	-1.01948	7.8959e-07
nanE	2790672..2791370	36.596	1.32554	6.42362e-08		cg1393	1302020..1302526	67.8474	-1.20633	7.62976e-07
cg0025	complement(17857..18729)	44.545	1.14387	5.72213e-08		cg3090	2947773..2948900	57.9172	-1.0692	6.59809e-07
cg2132	2024452..2025813	370.304	1.11035	5.01139e-08		gpmA	425176..425922	1696.95	-1.04817	4.74554e-07
cg1070	996120..996311	93.2984	1.19779	3.67995e-08		cg1082	1005423..1006256	54.7232	-1.05234	4.66514e-07
cg1735	complement(1624491..1626305)	88.0036	1.1036	3.25012e-08		cg2381	complement(2268901..2269326)	24.0259	-1.36745	4.21052e-07
cg2912	2771129..2771821	50.864	1.10145	3.07651e-08		cg0133	112564..114087	64.1531	-1.10234	3.90143e-07
cg1665	complement(1555534..1556151)	170.508	1.10623	2.87562e-08		putP	complement(1219496..1221070)	730.9	-1.07234	3.46708e-07
cg2106	1995471..1996430	95.1407	1.07942	2.71482e-08		cg1486	complement(1381019..1381726)	39.6141	-1.18971	3.00496e-07
cg1669	complement(1556550..1557293)	116.316	1.08892	2.28118e-08		cg3261	complement(3125146..3125511)	33.1196	-1.50432	2.07141e-07
cg2913	2771822..2772703	60.7866	1.16132	2.13609e-08		cg3292	3146931..3147167	65.532	-1.27167	2.01099e-07
cg2851	complement(2713304..2714209)	47.6035	1.08355	2.11309e-08		cg1081	1004477..1005403	46.251	-1.08647	1.7949e-07
cg2965	2822077..2823090	20.8768	1.33764	2.10426e-08		cg0467	412556..413635	62.4375	-1.20664	1.51805e-07
cg2329	2210713..2211759	36.1914	1.13109	1.51088e-08		cg0264	230675..230932	103.921	-1.20833	1.13643e-07
cysS2	complement(1597713..1598975)	53.3054	1.00534	1.33578e-08		cg0831	complement(744537..745373)	111.063	-1.05853	1.13288e-07
cg3131	complement(2989130..2990455)	72.477	1.14234	1.07721e-08		cg3264	complement(3127198..3128073)	695.218	-1.11939	1.10431e-07
cg2348	2231721..2232725	27.8486	1.21136	7.18188e-09		cg3347	3196030..3196461	51.9212	-1.332	1.02285e-07
cysJ	2978851..2980224	25.8878	1.18376	6.94999e-09		cg0590	complement(529588..530754)	58.2653	-1.40882	9.33491e-08
groEL'	610660..611034	2638.58	1.26428	5.60189e-09		cg0352	complement(307724..307918)	119.919	-1.30184	9.07943e-08
cg1009	939896..941098	22.9754	1.22251	4.18768e-09		whiB1	complement(807005..807265)	1100.47	-1.29776	8.2071e-08
serB	complement(2641228..2642568)	205.99	1.30676	3.58291e-09		cg3239	complement(3100798..3101724)	17.881	-1.36225	6.48276e-08
tcbF	complement(3230708..3231799)	47.0048	1.27611	2.83079e-09		cg2707	complement(2579857..2581101)	359.5	-1.14534	5.58677e-08
purD	complement(2739464..2740729)	235.095	1.32692	2.79863e-09		cg0867	796921..797586	2494.58	-1.10448	4.16957e-08
mez	3181586..3182764	248.537	1.22717	2.20502e-09		butA	2814384..2815160	1702.39	-1.11279	4.07337e-08
ilvB	1339600..1341480	518.44	1.29866	2.04084e-09		cg3087	complement(2946533..2947102)	11.3002	-1.82468	4.04151e-08
cg3113	complement(2972781..2973506)	18.3497	1.53096	1.60628e-09		narI	complement(1247185..1247964)	184.347	-1.09324	3.6776e-08
cg2401	complement(2290473..2291492)	110.887	1.08942	1.47393e-09		cg1736	complement(1626892..1627392)	32.2974	-1.42059	3.48407e-08
uspA2	complement(1479393..1479860)	242.244	1.00692	1.28949e-09		cg0194	165718..166461	158.751	-1.0181	3.34871e-08
cg1506	complement(1400021..1401001)	99.7502	1.10545	1.02548e-09		catA1	complement(2515695..2516552)	195.08	-1.0678	3.25375e-08
aspA	complement(1585377..1586957)	433.701	1.38111	9.49769e-10		cg2250	2133148..2133798	153.21	-1.10146	2.46388e-08
cg0444	complement(390784..392208)	235.572	1.27661	9.26693e-10		cg2685	complement(2560398..2561108)	173.731	-1.11584	2.45742e-08
cg1837	complement(1728091..1728639)	85.9785	1.19945	7.67808e-10		cg0527	complement(470653..471012)	120.27	-1.31553	1.6071e-08
bacA	complement(1599209..1600012)	133.698	1.19097	5.3446e-10		moeA3	complement(1261458..1262669)	40.1283	-1.0519	1.46838e-08
pitA	complement(481390..482667)	153.047	1.05757	3.97516e-10		cg0243	213665..214111	117.476	-1.1584	1.4157e-08
cg1370	1281238..1281711	253.715	1.2044	2.99847e-10		cg3091	2948860..2949669	58.5885	-1.17002	1.10616e-08
cg0773	687863..688822	215.275	1.10106	1.52459e-10		cg0176	151591..152373	52.3948	-1.1154	8.90845e-09
cg2402	complement(2291637..2292266)	773.064	1.48328	1.51196e-10		cg1328	1234071..1234307	157.794	-1.38344	7.36955e-09
thrB	1245323..1246252	313.204	1.38672	1.07439e-10		cg0238	complement(209990..211456)	845.54	-1.17368	5.22419e-09
cg0472	complement(417541..418299)	92.5409	1.27823	9.36484e-11		ptsF	2013557..2015623	130.353	-1.09285	4.88962e-09
cmr	2934648..2936027	49.2183	1.21	3.19855e-11		glpQ1	complement(3080255..3081016)	127.554	-1.11383	4.44119e-09
cg1240	1140348..1140716	77.3696	1.13037	2.48583e-11		sucD	complement(2696146..2697030)	512.269	-1.32764	3.98987e-09
cg1664	1553925..1555442	75.0782	1.18524	1.30725e-11		cg0842	complement(762376..764676)	53.2717	-1.03058	3.92106e-09
cg3132	2990790..2992529	74.6004	1.09774	1.25072e-11		cg0780	694501..695586	252.497	-1.14722	3.66491e-09
cmt2	complement(3048843..3049868)	1903.61	1.32539	2.78826e-12		cg2703	complement(2576281..2577195)	1771.18	-1.15611	3.63136e-09
dfp	complement(1701973..1703148)	69.1522	1.0844	2.03586e-12		cg2184	2074023..2075756	309.42	-1.11761	3.56149e-09
cg2778	complement(2640510..2641133)	113.118	1.38734	9.11006e-13		ctpA	complement(407707..409974)	31.6202	-1.23357	3.09928e-09
lppS	complement(2592644..2593855)	180.744	1.20341	9.10549e-13		cg0844	complement(771017..775615)	87.6326	-1.18809	3.08609e-09
cg2087	1978271..1978849	207.31	1.24433	6.25048e-13		cg0316	complement(277984..278277)	33.1317	-1.74564	1.41346e-09
cg3334	3180156..3181334	36.0775	1.42107	5.31893e-13		cg2704	complement(2577199..2578044)	2163.32	-1.23014	1.41205e-09
recF	3585..4769	114.828	1.15824	4.0051e-13		cg3272	complement(3132385..3133107)	82.4639	-1.21573	1.3135e-09
cg1289	1188511..1189860	18.2758	1.76174	3.74191e-13		narK	complement(1254022..1255359)	185.884	-1.20136	1.26806e-09
cg0456	402798..404432	18.4703	1.32763	1.86665e-13		cg3159	3015300..3015746	237.704	-1.20436	5.69002e-10
cgtR3	complement(2747416..2748123)	183.721	1.14852	1.76752e-13		thiM	complement(1543583..1544389)	71.9562	-1.35397	4.53214e-10
cg2666	2543186..2543854	24.4375	1.71533	1.09591e-13		gluD	2032364..2033311	289.11	-1.18015	4.53214e-10
fixB	1297721..1298674	324.162	1.26523	9.69542e-14		mraW	complement(2265786..2266799)	125.006	-1.12531	4.24573e-10
cg0455	401149..402798	17.1118	1.59425	5.59481e-14		cg0843	complement(764707..771009)	56.2978	-1.12875	3.90457e-10
cg2186	2077702..2078439	39.6069	1.25062	5.25551e-14		gntV	2602310..2602813	12.0774	-2.52445	2.60766e-10
cg2651	2532791..2533042	76.9232	1.66579	4.91389e-14		gluC	2031678..2032364	402.981	-1.19807	2.27331e-10
cg0936	complement(869271..869852)	510.894	1.62169	3.26945e-14		cg2380	complement(2268182..2268571)	2405.47	-1.35003	1.34782e-10
cg1494	complement(1387757..1388680)	99.0139	1.45218	1.24086e-14		rne	complement(2476504..2479569)	108.582	-1.0407	1.32404e-10
cg2073	1966229..1966588	12.1385	3.41106	7.52493e-15		cg3192	3055869..3057269	227.258	-1.40377	7.13131e-11
cg3375	3224066..3224716	29.7496	1.72013	5.07095e-15		cg2823	2682310..2682984	94.5186	-1.29009	6.99976e-11
cg2072	complement(1965828..1966136)	16.4532	3.20252	3.83088e-15		udgA1	381949..383112	212.517	-1.12031	6.56073e-11
cg2439	complement(2326849..2327064)	66.1986	2.24991	3.83088e-15		cg1097	complement(1018741..1019340)	66	-1.61184	5.07614e-11
cg0207	179690..180715	20.6231	1.91406	2.57263e-15		cg2601	2482722..2483102	132.215	-1.25133	4.86738e-11
cg0211	182820..184055	13.8391	1.76577	2.57263e-15		mraZ	complement(2267045..2267476)	1479.33	-1.42534	4.5276e-11
cg1833	1724339..1725298	60.3898	1.54695	2.57263e-15		cg3317	3164661..3165158	292.683	-1.28567	4.44485e-11
groEL	complement(2862202..2863848)	6762.29	1.58227	1.31031e-15		cg3226	3091591..3092892	133.867	-1.1708	3.36537e-11
cg2691	complement(2565641..2566270)	192.464	1.50155	1.31031e-15		cg2612	complement(2493340..2493927)	252.44	-1.04918	1.60585e-11
fixA	1296903..1297691	323.194	1.39423	1.31031e-15		cg1277	1172161..1172658	251.256	-1.28427	9.08919e-12
metE	complement(1189853..1192090)	1327.18	6.84314	0		cg0282	244016..244219	563.211	-1.66724	7.55327e-12
cg0772	686723..687856	209.628	4.75933	0		cg1179	1091632..1094688	55.1018	-1.16265	6.60688e-12
gabT	501576..502922	881.873	4.20314	0		cg0242	212726..213661	257.913	-1.16374	5.71132e-12
msmA	170934..172448	62.8213	3.99352	0		cg1007	938851..939873	366.71	-1.14474	4.57716e-12
cg0223	complement(190701..192176)	64.253	3.70993	0		cgtR2	929518..930285	152.895	-1.23864	3.39275e-12
gabD2	502924..504285	770.287	3.63968	0		prpD2	672615..674129	20.3744	-1.91663	1.16085e-12
cg0198	169997..170920	60.5377	3.49016	0		psp5	3061854..3063974	178.724	-3.39604	9.10549e-13
metB	complement(2561985..2563145)	249.705	3.47936	0		nth	307955..308737	69.5579	-1.45043	8.30332e-13
iolH	177329..178207	141.764	3.37944	0		moaB	complement(226758..227231)	244.161	-1.24949	3.44233e-13
iolG	176309..177322	163.05	3.34121	0		cg0815	732785..733273	186.143	-1.12541	2.03976e-13
cg1410	1317806..1318915	106.206	3.32568	0		gluB	2030669..2031556	859.068	-1.57453	1.98838e-13
cg3399	complement(3254971..3255480)	184.853	3.31814	0		cg2229	complement(2116311..2116616)	173.421	-1.54684	6.05045e-14
metY	complement(667918..669231)	431.019	3.31672	0		cg2118	2011777..2012571	73.7584	-1.43906	4.56994e-14
metX	complement(666641..667774)	113.237	3.29625	0		int3	2583267..2583950	28.7749	-1.67499	4.34429e-14
cg1413	1321469..1322413	450.626	3.26549	0		cg2252	2134440..2134790	87.7978	-1.78857	2.4302e-14
iolE	175320..176276	157.537	3.22848	0		cg1045	971888..972211	623.188	-1.19867	2.19477e-14
cg1414	1322420..1322791	204.128	3.1711	0		cg0646	complement(568271..569077)	40.2013	-1.25372	2.08006e-14
cg0568	504324..505571	973.563	3.09295	0		cg3096	complement(2953484..2955004)	301.158	-1.64273	1.47858e-14
idhA1	3237450..3238457	98.5616	3.08932	0		cg0683	602812..604413	202.143	-1.62358	1.47858e-14
cg1412	1320473..1321447	350.655	3.07218	0		cg3138	2997685..2998662	87.3029	-1.15559	8.74785e-15
cg3390	3236545..3237426	73.0957	3.06023	0		gluA	2029823..2030551	778.147	-1.4093	7.52493e-15
metK	complement(1700642..1701865)	531.796	3.02808	0		cg0845	complement(775620..778508)	65.4766	-1.01567	6.31589e-15
cg1411	1318902..1320476	184.281	3.00854	0		cg2748	2622115..2622579	817.004	-1.4063	5.07095e-15
cg0737	complement(651850..652749)	2067.44	2.99087	0		pfkB	2012568..2013560	82.1089	-1.34763	2.57263e-15
dctA	complement(2731168..2732508)	149.215	2.96436	0		mog	1255617..1256105	44.0188	-1.87386	1.31031e-15
cg3022	2882539..2883099	128.021	2.94324	0		cg3368	3217067..3218653	43.222	-1.31749	1.31031e-15
rbsK1	complement(1432123..1433046)	300.779	2.89818	0		cg2363	complement(2248550..2249008)	426.032	-1.28827	1.31031e-15
iolD	173366..175279	86.7731	2.89749	0		cg2177	complement(2066891..2067229)	500.467	-1.04346	1.31031e-15
cg1545	complement(1430658..1432109)	381.975	2.87329	0		hmp	complement(2999445..3000605)	1271.57	-6.51937	0
nrdE	complement(2649149..2651296)	735.605	2.79773	0		cg3323	3170719..3171810	372.719	-4.34256	0
cg0206	178286..179662	24.7501	2.75666	0		cg2425	2316103..2317722	364.898	-3.25347	0
iolB	172469..173359	76.0506	2.75525	0		cg2962	complement(2816737..2817030)	691.914	-3.1729	0
cysD	complement(2974845..2975759)	32.2606	2.66458	0		cg3242	3103092..3104705	54.7795	-2.81888	0
cg0196	complement(167835..168596)	23.919	2.65722	0		cg1279	complement(1173334..1173867)	269.125	-2.81506	0
idhA2	3238492..3239577	102.501	2.59684	0		cg2610	complement(2490071..2491648)	273.765	-2.787	0
nagA1	complement(2787387..2788553)	36.3377	2.55075	0		cg3202	3068797..3069597	562.372	-2.7122	0
iunH3	complement(1429688..1430626)	361.971	2.53107	0		cg1327	1233198..1233950	325.208	-2.6916	0
cysH	complement(2975756..2976541)	20.8641	2.51209	0		cg3303	complement(3153855..3154433)	280.664	-2.63169	0
hom	1243975..1245312	441.793	2.47095	0		cg1604	1493614..1494579	139.162	-2.61033	0
cg3389	3235453..3236532	58.8047	2.46664	0		prpB2	674129..675052	25.5697	-2.57032	0
cysI	complement(2976783..2978468)	23.9315	2.45904	0		cg0538	complement(478985..479302)	243.464	-2.52147	0
cg2911	2770174..2771118	39.3662	2.36842	0		cg1603	1492411..1493604	115.52	-2.50499	0
cysN	complement(2973544..2974845)	31.8982	2.34856	0		cg0852	complement(783632..784090)	75.3304	-2.49734	0
cg0736	complement(650572..651654)	235.84	2.33761	0		cg0045	31677..32702	178.929	-2.49377	0
nanA	2788767..2789705	38.2042	2.32075	0		cg2080	1971537..1972163	292.961	-2.43161	0
iolC	168976..169995	51.0735	2.24587	0		prpC2	675081..676232	30.1238	-2.37422	0
cg3387	complement(3231866..3233392)	40.3769	2.233	0		cg0044	30697..31680	123.734	-2.36394	0
cg1417	1322944..1323582	71.4587	2.23072	0		ldh	complement(3085753..3086697)	568.987	-2.22787	0
nrdH	complement(2652090..2652323)	960.578	2.18676	0		cg3367	3216153..3217070	60.5457	-2.12331	0
cg2438	2326855..2327073	92.1582	2.10491	0		modA	complement(229709..230515)	152.386	-2.09568	0
nrdI	complement(2651355..2651801)	257.733	2.07292	0		cg0528	complement(471117..471419)	96.9182	-2.07585	0
betP	946465..948252	76.8528	2.06891	0		cg3195	3058567..3060357	577.082	-2.06708	0
metH	complement(1589037..1592627)	82.2514	2.06196	0		cg1080	1002796..1004337	107.272	-2.04178	0
recB	1582274..1583110	59.5631	2.01168	0		cg0537	complement(478088..478972)	97.3178	-2.03422	0
cg0735	complement(649898..650575)	160.618	1.98742	0		cg2519	complement(2398448..2399128)	379.989	-2.01859	0
cg2678	complement(2552384..2554093)	144.41	1.9807	0		whiB2	783037..783351	794.821	-1.9333	0
cg1626	complement(1516872..1517261)	96.3579	1.93938	0		mdh	complement(2493938..2494924)	1035.68	-1.92137	0
cg0212	184078..185091	14.7226	1.88473	0		cg2500	2384255..2384626	390.804	-1.89317	0
cg1832	1723249..1724325	62.496	1.86544	0		uspA3	complement(3115758..3116663)	3828.43	-1.89244	0
tnp1a(ISCg1a)	1115955..1117265	204.94	1.81935	0		cg2478	complement(2362856..2363665)	59.0766	-1.88883	0
cg2677	complement(2551442..2552383)	151.625	1.81931	0		cg1484	complement(1379930..1380409)	100.565	-1.86716	0
cg2675	complement(2548905..2550548)	139.453	1.78246	0		ackA	complement(2908620..2909813)	64.4767	-1.86652	0
uraA	complement(2017366..2018655)	133.144	1.77623	0		cg0081	complement(63591..64040)	145.458	-1.81849	0
cg2676	complement(2550552..2551436)	169.354	1.76967	0		tagA1	2998858..2999448	116.994	-1.77745	0
ccpA1	complement(1433039..1434079)	79.0684	1.68907	0		cg2952	complement(2808589..2809278)	346.282	-1.76251	0
cg3322	complement(3168514..3170376)	103.481	1.65299	0		cg3092	2949926..2951083	80.373	-1.72236	0
cg2124	complement(2016760..2017344)	149.649	1.59766	0		cg0963	898894..899163	2188.7	-1.71673	0
purC	complement(2735090..2735983)	210.415	1.58067	0		cg0704	623178..623621	162.06	-1.64968	0
cmt3	977756..979207	73.1195	1.42257	0		cg0834	complement(747092..748366)	999.754	-1.64817	0
cg0156	complement(132969..134114)	130.685	1.3623	0		cg0906	840398..840829	167.148	-1.6287	0
cg1312	complement(1218369..1218842)	351.474	1.35023	0		cg1291	1192555..1193013	159.221	-1.62126	0
cg2336	2216424..2216927	273.465	1.3239	0		moaA	complement(1263153..1264361)	166.691	-1.61254	0
cg0783	complement(698239..699468)	150.179	1.31982	0		cg3043	complement(2902561..2903055)	188.195	-1.57245	0
cg2127	2020370..2021158	225.8	1.24276	0		lexA	2006798..2007559	280.454	-1.54674	0
aroC	complement(1721135..1722367)	106.36	1.22188	0		pacL	1635033..1637711	59.2574	-1.53205	0
cg2089	complement(1979325..1979618)	267.489	1.21329	0		cg0840	complement(759100..759753)	141.985	-1.45748	0
cg1809	complement(1703497..1703784)	505.858	1.16304	0		cg2794	complement(2654802..2655215)	967.19	-1.45666	0
cg1590	1475586..1477163	50.7362	1.15914	0		cg2793	complement(2654050..2654799)	375.515	-1.41396	0
galE	1993007..1993996	138.751	1.08941	0		dps	complement(3174564..3175061)	264.999	-1.39799	0
						trpP	3205904..3206416	259.164	-1.39397	0
						cg3190	complement(3053151..3053657)	328.793	-1.36426	0
						cg1383	1293167..1294048	105.682	-1.31709	0
						moaC	complement(227216..227686)	69.3677	-1.29668	0
						cg0360	complement(313622..314464)	111.634	-1.26401	0
						cg2128	2021355..2021894	306.906	-1.17463	0
						fur	2384667..2385101	402.853	-1.1647	0
						pbp	complement(2091343..2093211)	48.2267	-1.16114	0
						cg0046	32699..33460	233.878	-1.13073	0
						cg2134	complement(2027166..2027837)	270.185	-1.0571	0

## Sheet: (d) T15 +CGP3 Log2
Supplementary Table 7,d. RNA-seq analysis across all targets and time points. Log₂ fold changes for +CGP3 cells under infection at timepoint 15 min. Differential expression values were filtered using the following criteria: maximum group mean > 10, false discovery rate (FDR) < 0.05, and log₂ fold change > 1 (overexpression) and log₂ fold change < 1 (reductions).
Name	Region	Max group mean	Log2 fold change	FDR p-value		Name	Region	Max group mean	Log2 fold change	FDR p-value
cg1139	complement(1057789..1058670)	309.588	1.06102	0.0484472		cg2004	complement(1889700..1890917)	12.4168	-1.26499	0.0401771
cg1141	complement(1059310..1060068)	421.914	1.02084	0.0300227		cg2519	complement(2398448..2399128)	98.5112	-1.02796	0.031333
cg1070	996120..996311	107.767	1.07023	0.0183502		mog	1255617..1256105	11.6583	-1.14281	0.0284374
cg2894	2753748..2754281	27.307	1.31293	0.0131749		cg3138	2997685..2998662	19.1946	-1.05388	0.0182851
JeanGrey_111	87278..87592	14.6861	9.13316	0.0127104		cg1392	complement(1301610..1301837)	16.6478	-1.26839	0.0159398
tnp1b(ISCg1b)	complement(2595722..2597032)	14.9397	1.0135	0.0120183		cg0537	complement(478088..478972)	22.7842	-1.34648	0.0120183
JeanGrey_63	50744..51130	13.3529	9.29219	0.0109157		cg2266	complement(2153139..2153423)	11.3007	-1.08449	0.009057
JeanGrey_121	90781..91077	17.8678	9.32708	0.0104256		cg2080	1971537..1972163	114.724	-1.6093	0.006933
cg2679	2554240..2556183	148.028	1.31019	0.009756		cg0081	complement(63591..64040)	14.8715	-1.00913	0.006775
JeanGrey_62	50374..50751	19.2649	9.7787	0.006553		cg3402	3256488..3256694	29.8816	-1.3922	0.003729
JeanGrey_66	52457..53137	15.2712	10.2979	0.003514		thiM	complement(1543583..1544389)	85.5366	-1.22132	0.001849
JeanGrey_116	88848..89342	22.1101	10.3721	0.003191		cg1635	complement(1523896..1524408)	124.249	-1.04162	0.001685
JeanGrey_115	88594..88845	46.938	10.4869	0.002748		cg1484	complement(1379930..1380409)	17.3364	-1.30833	0.00152
sucD	complement(2696146..2697030)	30.3405	1.35635	0.002732		fas-IB	887143..896052	176.178	-1.01014	0.001354
JeanGrey_80	62742..63656	13.3658	10.5321	0.002634		cg0538	complement(478985..479302)	22.8614	-1.17066	0.001266
JeanGrey_7	4957..5592	20.6279	10.6372	0.002356		glpQ1	complement(3080255..3081016)	34.8301	-1.20832	0.001147
cg0210	complement(181685..182680)	26.8866	1.08382	0.002129		cg3292	3146931..3147167	36.7049	-1.127	0.000682
cg0689	609748..610179	10.6809	1.18435	0.001864		tagA1	2998858..2999448	139.044	-1.11843	0.0006143
cg2911	2770174..2771118	20.7694	1.53251	0.0009187		cg1328	1234071..1234307	104.268	-1.48297	0.000582
cg2248	complement(2131554..2132246)	33.9483	1.24335	0.0006977		cg1418	1323861..1324877	28.3646	-1.06919	0.0005615
JeanGrey_83	65515..66582	25.1869	11.6675	0.0006129		cg0704	623178..623621	63.6743	-1.29153	0.0004932
ptsG	1424684..1426735	253.786	1.03275	0.0006014		cg3367	3216153..3217070	13.9325	-1.52756	0.0002382
JeanGrey_119	90447..90677	121.907	11.7341	0.0005615		cg1265	1161103..1161270	20.7628	-1.39753	0.0002107
JeanGrey_110	86807..87262	62.3323	11.7448	0.0005553		cg2425	2316103..2317722	81.1243	-1.2792	0.0001732
cg0544	complement(481127..481390)	111.424	1.19533	0.0005069		cg3202	3068797..3069597	191.859	-1.73775	0.0001495
JeanGrey_61	50122..50343	141.026	11.8919	0.0004626		dps	complement(3174564..3175061)	163.909	-1.15633	0.0001378
trxB1	complement(3151416..3151790)	874.654	1.40024	0.0003927		cg1647	1535248..1535991	34.5284	-1.20799	7.778e-05
cg3125	complement(2983013..2984545)	213.921	1.67699	0.0003806		poxB	complement(2750074..2751813)	43.9635	-1.04838	5.567e-05
cg0223	complement(190701..192176)	614.43	1.09831	0.0002539		cg1279	complement(1173334..1173867)	82.0439	-1.25934	3.982e-05
cg2438	2326855..2327073	37.0235	1.74064	0.0002085		cg0242	212726..213661	40.7476	-1.03187	3.53e-05
cg1735	complement(1624491..1626305)	259.821	1.05392	0.0001987		ftn	2646478..2646966	393.537	-1.21531	3.282e-05
gapX	994644..996086	300.941	1.16266	0.0001888		cg1080	1002796..1004337	26.5025	-1.16786	2.522e-05
cg1255	1152654..1153841	32.3582	1.11099	0.0001715		ldh	complement(3085753..3086697)	73.0372	-1.50656	1.487e-05
cg0047	complement(33462..34274)	141.314	1.07622	0.0001269		cg2962	complement(2816737..2817030)	203.512	-1.67945	1.29e-05
cg0195	166458..167423	128.517	1.03632	9.65e-05		cg1966	complement(1847802..1848158)	379.328	-1.15836	6.383e-06
cg0936	complement(869271..869852)	187.274	1.15175	7.654e-05		cg1277	1172161..1172658	139.455	-1.38342	6.244e-06
cg1138	1057253..1057792	229.711	1.07063	6.423e-05		lexA	2006798..2007559	112.899	-1.61138	3.408e-06
cg1142	complement(1060090..1061400)	479.788	1.14278	5.307e-05		cg2793	complement(2654050..2654799)	166.532	-1.91968	4.172e-07
sirR	658008..658679	59.5129	1.2174	4.678e-05		uspA3	complement(3115758..3116663)	985.936	-2.11008	2.493e-07
cg1717	complement(1606294..1606728)	389.945	1.05036	3.743e-05		hmp	complement(2999445..3000605)	1874.86	-3.76906	2.136e-07
fmu	complement(1695432..1696967)	325.895	1.17779	3.31e-05		cg1291	1192555..1193013	99.2565	-1.33622	1.983e-07
aroF	1048080..1049180	34.2874	1.10219	3.286e-05		cg3272	complement(3132385..3133107)	92.1496	-1.64951	1.983e-07
JeanGrey_5	4112..4678	183.226	13.6174	3.139e-05		cg3264	complement(3127198..3128073)	105.138	-1.1446	8.925e-08
cg3031	complement(2890935..2892065)	100.416	1.02193	2.382e-05		cg2794	complement(2654802..2655215)	287.921	-1.61901	5.66e-08
pyrE	complement(2930788..2931342)	660.295	1.33914	1.112e-05		cg0683	602812..604413	75.3373	-1.56335	1.38e-09
mdh2	complement(676552..677595)	18.3674	2.27672	6.626e-06		narK	complement(1254022..1255359)	73.4717	-1.36943	4.213e-10
cg0046	32699..33460	72.0829	1.23535	3.771e-06		cg1327	1233198..1233950	224.217	-1.78792	1.39e-10
cg2431	complement(2322581..2322982)	76.013	1.54199	3.408e-06		cg3303	complement(3153855..3154433)	177.809	-1.47103	3.059e-11
cg2432	complement(2322979..2323515)	238.637	1.22841	3.294e-06		cg1447	1346935..1347909	62.5504	-1.74653	2.083e-11
cg3387	complement(3231866..3233392)	14.8969	1.33475	1.941e-06		mdh	complement(2493938..2494924)	220.329	-1.74858	4.32e-12
cg0688	607959..609683	81.6828	1.257	1.789e-06		cg0569	505697..507649	76.1699	-2.161	1.342e-14
fmt	complement(1696964..1697911)	391.192	1.74572	1.751e-06		cg3242	3103092..3104705	196.841	-3.15334	0
cg3015	complement(2866405..2868369)	60.5522	1.11744	1.527e-06
cg1664	1553925..1555442	84.6325	1.23012	1.225e-06
tmk	791569..792180	175.598	1.18262	8.294e-07
JeanGrey_6	4686..4949	23.2828	7.24575	6.944e-07
cg0836	749586..749918	88.2014	2.04889	4.407e-07
cg2184	2074023..2075756	254.445	1.5599	2.424e-07
cg1020	complement(953300..954460)	19.0044	2.14233	1.883e-07
cg0890	complement(822760..823560)	22.9817	1.55234	1.196e-07
cg1103	complement(1027972..1030470)	21.6189	1.34146	1.091e-07
fadD4	complement(1264351..1266078)	170.048	2.03835	8.198e-08
cg3070	complement(2930133..2930801)	382.915	1.56403	7.731e-08
cg1915	1802345..1802782	44.7922	2.77176	5.792e-08
cg1449	1349927..1351546	120.142	1.32157	4.937e-08
cg0265	complement(230929..231843)	124.725	1.45345	8.159e-09
cg1429	1333422..1334480	154.912	1.47455	6.304e-09
JeanGrey_65	52192..52446	49.9553	8.30838	6.213e-09
cg3016	complement(2868377..2870833)	195.726	1.62366	5.595e-09
cg1542	complement(1429268..1429516)	18.5308	2.29672	4.763e-09
cg0712	complement(628035..629000)	30.5627	1.72107	4.192e-09
cg0514	456640..457152	141.09	1.58827	2.322e-09
gntP	3081438..3082829	30.1697	2.22374	1.629e-09
cg2610	complement(2490071..2491648)	19.2396	1.83079	1.042e-09
ornA	2590556..2591215	130.193	1.68303	2.027e-10
cg1285	1185075..1185728	71.332	1.66317	1.069e-10
cg2107	1996542..1999094	108.295	1.82649	9.561e-11
cg1417	1322944..1323582	68.7324	1.73416	7.469e-11
def2	complement(1697931..1698440)	272.357	1.6055	4.184e-11
cg2402	complement(2291637..2292266)	343.699	1.59807	4.113e-11
cg3195	3058567..3060357	18.2096	1.52403	2.08e-11
cg3022	2882539..2883099	49.2172	2.30905	1.691e-11
cg2959	2815439..2815765	91.4521	2.35804	1.174e-11
JeanGrey_71	55886..57124	25.3029	9.60111	1.085e-11
cg1607	1496654..1497331	359.999	1.69975	9.136e-12
gluD	2032364..2033311	84.9454	1.87039	4.288e-12
cg2183	2072992..2074026	224.657	1.65387	1.382e-12
cg2181	2070290..2071894	868.007	1.96388	4.546e-13
cgtS7	625132..626403	47.4372	1.90453	3.33e-13
papA	604429..605712	307.161	2.68935	1.998e-13
JeanGrey_105	84250..85230	17.7615	7.90687	7.68e-14
cg3126	complement(2984545..2985111)	136.579	2.10534	3.23e-14
JeanGrey_2	2186..2725	106.546	10.4748	2.934e-14
JeanGrey_11	6643..7221	99.4487	10.4808	2.934e-14
pcrA	912697..914988	140.434	2.79323	2.659e-14
tagA2	157585..158142	38.1758	3.69676	1.342e-14
cg2951	2807497..2808597	291.261	2.86695	1.342e-14
cg0266	complement(231846..232268)	133.438	2.04928	6.912e-15
JeanGrey_10	6249..6560	217.527	10.7136	6.912e-15
cg1609	complement(1498259..1499791)	45.1332	1.8761	3.527e-15
cg2027	complement(1918798..1918986)	68.9614	3.16566	3.527e-15
cg0183	158155..158835	59.6436	2.70498	0
pat	complement(232258..233283)	190.057	2.15219	0
cyaB	complement(326693..328336)	663.6	2.97014	0
cg0451	398278..399582	323.703	4.30498	0
cg0452	399598..400020	219.677	2.25259	0
hemB	454966..455985	172.543	2.07367	0
cg0513	456015..456599	79.7307	2.04272	0
cg0685	605719..606396	189.767	2.84637	0
cg0686	606393..606902	166.939	2.71808	0
gcp	606906..607940	231.977	2.11374	0
cg0742	complement(658663..659457)	193.862	3.97151	0
prpD2	672615..674129	93.8555	4.75711	0
prpB2	674129..675052	120.704	4.94466	0
prpC2	675081..676232	173.08	4.76587	0
cg0837	749919..750290	112.901	4.6181	0
cg0838	complement(750356..755158)	319.172	5.06499	0
cg0839	complement(755167..758868)	468.734	5.27126	0
cg0840	complement(759100..759753)	177.78	2.19685	0
cg0841	complement(759834..762269)	308.007	4.68965	0
cg0885	812643..815693	619.945	5.14817	0
cg0886	815686..818898	454.711	5.14192	0
cg0887	818938..819999	288.235	2.92649	0
cg0888	819996..820712	200.955	2.40012	0
cg0889	820727..822763	105.524	2.18299	0
cg1018	950260..952311	279.299	4.87786	0
cg1019	complement(952294..952929)	138.349	4.20046	0
cg1263	1160007..1160723	130.666	2.62484	0
cg1286	1185823..1186626	266.938	1.8584	0
cg1287	complement(1186683..1187156)	959.331	6.86918	0
cg1318	1225355..1226530	199.274	4.30577	0
cg1319	1226534..1229164	195.038	3.98438	0
lipP	1229331..1230107	60.9844	4.53996	0
cg1399	complement(1307389..1308852)	163.167	2.25808	0
cg1400	complement(1308927..1309640)	179.39	3.56631	0
ligA	1309798..1311840	730.357	4.40741	0
cg1410	1317806..1318915	148.519	6.03049	0
cg1411	1318902..1320476	368.08	5.91636	0
cg1412	1320473..1321447	448.452	5.39103	0
cg1413	1321469..1322413	486.179	5.12409	0
cg1414	1322420..1322791	235.106	5.12677	0
cg1427	1332571..1333347	373.5	4.49187	0
iunH3	complement(1429688..1430626)	400.054	4.06108	0
cg1545	complement(1430658..1432109)	535.881	4.12721	0
rbsK1	complement(1432123..1433046)	482.408	4.06543	0
ccpA1	complement(1433039..1434079)	155.182	3.3373	0
uvrB	1435509..1437671	383.256	2.87863	0
cg1567	1451671..1452162	128.194	5.15551	0
ugpA	1452358..1453290	130.724	4.69962	0
ugpE	1453287..1454123	26.718	4.52362	0
ugpB	1454225..1455541	25.4204	3.64674	0
ugpC	1455582..1456808	35.4192	3.28904	0
xerD	1497328..1498242	202.787	2.30518	0
cg1742	1633139..1633396	212.82	3.59835	0
cg1743	1633406..1634794	398.636	3.38935	0
cg1916	1802966..1803571	313.099	2.99198	0
cg1917	complement(1803624..1804049)	188.232	3.34553	0
cg1962	1844276..1844812	431.365	4.52084	0
cg2026	1918416..1918640	3902.94	4.42072	0
cg2028	complement(1919033..1919680)	137.761	2.7765	0
cg2112	complement(2005476..2005928)	391.574	3.75294	0
cg2113	complement(2006036..2006458)	386.912	6.34989	0
recX	complement(2033344..2033991)	232.399	4.9191	0
recA	complement(2034035..2035165)	2988.76	5.23953	0
cg2182	2072073..2072999	198.39	1.89459	0
cg2190	2081288..2082712	53.9678	3.18168	0
cg2191	complement(2082764..2083684)	110.412	4.15621	0
cg2277	2161575..2163200	103.715	4.22417	0
cg2279	2163197..2164729	75.8162	3.07149	0
cg2321	2202675..2204105	177.645	2.60537	0
cg2322	2204190..2204798	18.631	2.96547	0
cg2381	complement(2268901..2269326)	1021.04	5.5385	0
cg2417	complement(2306697..2307413)	408.27	2.78215	0
cg2664	2540887..2541972	181.127	4.7472	0
cg2665	complement(2541982..2542959)	64.9932	2.73762	0
cg2717	2589746..2590546	187.589	1.99344	0
cg2893	2752274..2753758	23.0103	1.91624	0
radA	2806099..2807493	638.553	5.33614	0
cg2960	2815802..2816545	91.9322	3.1717	0
cg3017	complement(2870833..2873634)	301.174	2.07034	0
cg3018	complement(2873635..2877228)	330.522	2.4622	0
cg3019	complement(2877269..2879950)	609.919	2.84709	0
cg3020	complement(2879944..2880558)	665.419	3.33482	0
cg3102	complement(2961517..2962152)	78.5971	3.74056	0
cg3103	complement(2962149..2963255)	186.311	5.04602	0
cg3104	complement(2963257..2966592)	347.016	5.80375	0
cg3105	complement(2966589..2967227)	220.342	6.04746	0
cg3106	complement(2967224..2968711)	391.543	6.76031	0
cg3127	complement(2985111..2986115)	114.281	2.3529	0
cg3208	3072869..3074008	195.465	3.79902	0
cg3345	3192085..3193011	314.417	4.77284	0
JeanGrey_34	24105..24635	49.7902	8.5077	0
JeanGrey_94	74069..74923	115.416	9.87821	0
JeanGrey_117	89459..89932	174.95	9.24765	0
JeanGrey_118	89957..90370	59.136	7.48211	0
JeanGrey_122	91233..91598	829.757	12.0365	0

## Sheet: (e) T30 +CGP3 Log2
Supplementary Table 7,e. RNA-seq analysis across all targets and time points. Log₂ fold changes for +CGP3 cells under infection at timepoint 30 min. Differential expression values were filtered using the following criteria: maximum group mean > 10, false discovery rate (FDR) < 0.05, and log₂ fold change > 1 (overexpression) and log₂ fold change < 1 (reductions).
Name	Region	Max group mean	Log₂ fold change	FDR p-value		Name	Region	Max group mean	Log₂ fold change	FDR p-value
tagA2	157585..158142	24.9297	2.45694	0.000111828		narI	complement(1247185..1247964)	101.836	-0.961614	0.0326748
cg0183	158155..158835	41.7008	1.68147	0.00241385		cg1418	1323861..1324877	94.5839	-1.36206	0.00282979
cg0407	complement(353747..354388)	61.5491	1.4421	0.0172526		cg1464	complement(1364390..1364605)	23.9545	-1.64306	0.0334873
cg0451	398278..399582	165.759	1.41857	0.00178888		cg1603	1492411..1493604	37.6985	-2.11429	0.000163152
cg0685	605719..606396	93.6757	1.20402	0.0200082		tnp13b(ISCg13b)	1673190..1674593	10.3351	-6.55082	0
cg0686	606393..606902	85.1261	1.2846	0.0127256		cg2080	1971537..1972163	108.687	-1.96146	2.46089e-06
cg0742	complement(658663..659457)	77.5869	2.1694	7.24627e-05		cg2425	2316103..2317722	76.5013	-1.54885	0.00396183
cg0836	749586..749918	115.69	2.39691	8.36264e-05		cg2610	complement(2490071..2491648)	128.049	-1.06624	0.0351561
cg0837	749919..750290	133.183	4.88455	0		mdh	complement(2493938..2494924)	249.122	-1.39181	0.00416866
cg0838	complement(750356..755158)	274.859	4.35219	0		cg2962	complement(2816737..2817030)	213.03	-2.02364	0.00722331
cg0839	complement(755167..758868)	268.324	3.9273	0		hmp	complement(2999445..3000605)	60.4686	-2.27256	8.36264e-05
cg0841	complement(759834..762269)	140.083	3.04555	7.08119e-13		cg3202	3068797..3069597	236.864	-2.46022	2.00797e-08
cg0885	812643..815693	257.783	2.85122	5.81066e-07		uspA3	complement(3115758..3116663)	1119.87	-1.4465	0.013544
cg0886	815686..818898	250.065	3.31217	3.57239e-11		rmpC	complement(3213618..3215159)	115.04	-1.34942	0.00123382
cg0887	818938..819999	255.887	2.18722	3.95371e-07
cg0888	819996..820712	211.34	1.86448	0.000139961
cg0889	820727..822763	123.435	1.97033	2.03439e-07
betP	946465..948252	62.9916	1.0725	0.0388776
cg1018	950260..952311	111.966	3.34653	0
cg1019	complement(952294..952929)	67.0794	2.84527	1.4442e-06
cg1020	complement(953300..954460)	12.9741	1.79848	0.0118513
cg1096	1018027..1018491	193.727	1.31686	0.00262172
cg1287	complement(1186683..1187156)	268.219	5.06134	0
cg1318	1225355..1226530	84.6381	2.54869	7.47374e-11
cg1319	1226534..1229164	101.618	2.59971	2.26084e-12
lipP	1229331..1230107	28.3483	3.34273	1.51775e-07
cg1370	1281238..1281711	400.601	1.38376	0.00338641
cg1400	complement(1308927..1309640)	88.1516	1.48304	0.0296786
ligA	1309798..1311840	398.41	1.90563	0.000541864
cg1410	1317806..1318915	131.789	4.82658	0
cg1411	1318902..1320476	375.528	4.59969	0
cg1412	1320473..1321447	645.746	4.45147	0
cg1413	1321469..1322413	858.175	4.77274	0
cg1414	1322420..1322791	419.184	4.83122	0
cg1417	1322944..1323582	106.41	1.8616	0.00275736
cg1427	1332571..1333347	260.688	3.68399	8.07285e-12
cg1542	complement(1429268..1429516)	14.7075	1.7483	0.0316894
iunH3	complement(1429688..1430626)	268.34	2.52832	2.49923e-09
cg1545	complement(1430658..1432109)	304.351	2.53069	2.11569e-11
rbsK1	complement(1432123..1433046)	244.441	2.29333	1.79323e-10
ccpA1	complement(1433039..1434079)	65.1896	2.72761	2.49739e-05
uvrB	1435509..1437671	198.879	1.35121	0.0200727
cg1567	1451671..1452162	81.1333	4.73724	0
ugpA	1452358..1453290	73.3684	3.70089	6.60636e-14
ugpE	1453287..1454123	17.0377	3.59394	1.57988e-09
ugpB	1454225..1455541	18.2491	3.26058	1.7514e-06
ugpC	1455582..1456808	29.9056	2.70106	1.2379e-06
cg1609	complement(1498259..1499791)	25.878	1.48182	0.00817152
cg1717	complement(1606294..1606728)	790.804	1.16961	0.012174
cg1743	1633406..1634794	266.524	1.41595	0.00437977
cg1915	1802345..1802782	21.6674	3.1166	8.36264e-05
cg1916	1802966..1803571	128.938	2.157	1.31259e-05
cg1917	complement(1803624..1804049)	74.8135	2.29458	3.60863e-07
cg1962	1844276..1844812	164.032	3.56475	1.95614e-12
cg2025	1917900..1918208	89.0113	1.40225	0.0376962
cg2026	1918416..1918640	3686.56	4.52162	5.23936e-11
cg2027	complement(1918798..1918986)	42.9158	2.0864	0.00980881
cg2089	complement(1979325..1979618)	340.881	1.49085	0.0104755
cg2112	complement(2005476..2005928)	145.643	2.74284	4.80469e-07
cg2113	complement(2006036..2006458)	140.594	4.66669	0
recX	complement(2033344..2033991)	108.886	3.12582	7.16185e-09
recA	complement(2034035..2035165)	1154.68	3.64165	0
cg2191	complement(2082764..2083684)	71.9051	1.42443	0.00148595
cg2277	2161575..2163200	42.9628	1.85089	5.71604e-05
cg2279	2163197..2164729	37.1979	1.33905	0.0399771
cg2381	complement(2268901..2269326)	346.171	5.12045	0
cg2417	complement(2306697..2307413)	274.528	1.24001	0.00623241
cg2439	complement(2326849..2327064)	61.4444	1.88017	0.0151741
cg2664	2540887..2541972	74.9126	3.21964	5.38831e-12
cg2665	complement(2541982..2542959)	44.1787	1.29541	0.0270179
radA	2806099..2807493	204.402	3.91338	0
cg2951	2807497..2808597	120.637	1.30376	0.00290509
cg2960	2815802..2816545	35.1902	2.08695	0.000862671
cg3013	complement(2864235..2865446)	341.662	1.69971	4.50482e-05
cg3014	complement(2865443..2866408)	226.169	1.90888	3.7221e-07
cg3015	complement(2866405..2868369)	166.118	2.14595	3.99584e-08
cg3016	complement(2868377..2870833)	288.617	1.9253	0.000428129
cg3017	complement(2870833..2873634)	268.359	1.73393	0.00457485
cg3020	complement(2879944..2880558)	275.976	1.82226	0.00196908
cg3022	2882539..2883099	127.397	1.9004	9.26179e-05
cg3102	complement(2961517..2962152)	72.4069	1.71797	0.000329153
cg3103	complement(2962149..2963255)	123.584	3.73741	0
cg3104	complement(2963257..2966592)	177.861	3.7043	0
cg3105	complement(2966589..2967227)	98.1437	4.17776	6.48428e-13
cg3106	complement(2967224..2968711)	154.34	4.00223	0
cg3208	3072869..3074008	104.64	1.61596	0.000560593
cg3345	3192085..3193011	132.775	3.14365	2.26084e-12

## Sheet: (f) T60 +CGP3 Log2
Supplementary Table 7,f. RNA-seq analysis across all targets and time points. Log₂ fold changes for +CGP3 cells under infection at timepoint 60 min. Differential expression values were filtered using the following criteria: maximum group mean > 10, false discovery rate (FDR) < 0.05, and log₂ fold change > 1 (overexpression) and log₂ fold change < 1 (reductions).
Name	Region	Max group mean	Log₂ fold change	FDR p-value		Name	Region	Max group mean	Log₂ fold change	FDR p-value
cg0852	complement(783632..784090)	75.3304	-1.13423	0.0402195		cg0405	352694..353641	90.9497	1.0956	0.0379123
fdxA	complement(3134391..3134714)	74.9266	-1.2159	0.0371093		cg3399	complement(3254971..3255480)	53.6068	1.24602	0.0280358
porC	complement(1034227..1034598)	98.5589	-1.56331	0.0290343		recB	1582274..1583110	39.9952	1.14556	0.0249914
cg0955	complement(886017..886859)	47.469	-1.6751	0.016654		cg3022	2882539..2883099	48.15	1.24038	0.0171917
cg2962	complement(2816737..2817030)	691.914	-1.00905	0.0125593		cg1427	1332571..1333347	35.1416	1.32909	0.0110656
cg1199	1104662..1104997	11.385	-1.07613	0.00988871		cg3106	complement(2967224..2968711)	24.8802	1.33346	0.00469485
prpC2	675081..676232	30.1238	-1.44142	0.00593073		cg0466	410706..412547	55.3765	1.04192	0.00319231
cg3274	complement(3134027..3134245)	34.1815	-1.09442	0.00266923		cg0924	852821..853837	528.993	1.36121	0.00157937
cg1340	complement(1246308..1247000)	71.5416	-1.09904	0.00234988		cg2911	2770174..2771118	18.8429	1.01602	9.4691e-05
cg1524	complement(1414090..1414383)	66.4891	-1.02528	0.000870783		cg3105	complement(2966589..2967227)	26.0192	1.1468	6.16168e-05
cg2320	complement(2202045..2202488)	24.4667	-1.02678	0.000284338		radA	2806099..2807493	39.4803	1.32194	3.3951e-05
tnp13b(ISCg13b)	1673190..1674593	15.4099	-1.35545	0.000226761		cg1494	complement(1387757..1388680)	93.579	1.07962	2.08917e-05
psp5	3061854..3063974	178.724	-2.1433	0.000154098		cg1070	996120..996311	104.644	1.07347	9.05699e-06
cg0272	complement(235449..236213)	22.206	-1.08545	0.000148369		cg0838	complement(750356..755158)	69.2268	1.11492	6.80805e-06
cg1478	1374140..1374601	22.6901	-1.09576	0.000115936		cg2556	2436020..2437447	19.8646	1.06345	2.68926e-06
mog	1255617..1256105	44.0188	-1.22421	0.00010774		cg0611	541107..542081	16.4741	1.27997	1.68692e-06
cg2004	complement(1889700..1890917)	15.8508	-1.16687	8.91138e-05		cg3103	complement(2962149..2963255)	36.3052	1.10779	1.61446e-06
cg2380	complement(2268182..2268571)	2405.47	-1.02997	8.91138e-05		cg0837	749919..750290	34.2946	1.21482	5.09215e-07
cg2748	2622115..2622579	817.004	-1.05917	8.91138e-05		cg3334	3180156..3181334	40.5995	1.30457	4.19643e-08
cg3202	3068797..3069597	562.372	-1.08441	4.08414e-05		cg2113	complement(2006036..2006458)	29.5464	1.51239	8.90977e-09
prpB2	674129..675052	25.5697	-1.51377	3.83742e-05		cg3104	complement(2963257..2966592)	40.3923	1.14918	5.01436e-09
ldh	complement(3085753..3086697)	568.987	-1.07256	1.16801e-05		cg0254	complement(222208..223695)	162.382	1.02615	2.20194e-13
mdh	complement(2493938..2494924)	1035.68	-1.19484	8.93957e-06		gabT	501576..502922	298.805	2.35116	0
cg1097	complement(1018741..1019340)	66	-1.02571	2.09796e-06		gabD2	502924..504285	382.944	2.3419	0
cg1483	complement(1379130..1379882)	22.1975	-1.40158	1.62498e-06		cg0568	504324..505571	678.871	2.28511	0
cg2252	2134440..2134790	87.7978	-1.32017	1.44658e-06		cg0783	complement(698239..699468)	153.647	1.06046	0
glpQ1	complement(3080255..3081016)	127.554	-1.02991	6.97649e-07		cg1287	complement(1186683..1187156)	45.0476	2.35217	0
gntV	2602310..2602813	12.0774	-1.56911	2.08326e-07		metE	complement(1189853..1192090)	59.2175	2.06371	0
cg3367	3216153..3217070	60.5457	-1.15151	1.70207e-07		cg1410	1317806..1318915	150.459	3.53988	0
cg1080	1002796..1004337	107.272	-1.2173	7.54062e-08		cg1411	1318902..1320476	334.011	3.57534	0
cg1291	1192555..1193013	159.221	-1.71114	2.28891e-08		cg1412	1320473..1321447	597.096	3.54784	0
cg1484	complement(1379930..1380409)	100.565	-1.48292	6.91266e-09		cg1413	1321469..1322413	766.075	3.73883	0
cg2519	complement(2398448..2399128)	379.989	-1.02132	2.28038e-09		cg1414	1322420..1322791	415.485	3.90246	0
uspA3	complement(3115758..3116663)	3828.43	-1.20181	2.21538e-09		cg1417	1322944..1323582	73.5714	1.97471	0
narK	complement(1254022..1255359)	185.884	-1.24768	9.9849e-10		iunH3	complement(1429688..1430626)	250.697	1.71077	0
cg0569	505697..507649	82.043	-1.58959	6.17696e-10		cg1545	complement(1430658..1432109)	241.069	1.91687	0
cg2425	2316103..2317722	364.898	-1.65279	5.58678e-10		rbsK1	complement(1432123..1433046)	168.185	1.76651	0
cg2610	complement(2490071..2491648)	273.765	-1.30731	5.03661e-10		cg2026	1918416..1918640	2401.31	1.7841	0
cg0704	623178..623621	162.06	-1.26074	4.75073e-11		recA	complement(2034035..2035165)	195.07	1.51401	0
tagA1	2998858..2999448	116.994	-1.50458	3.5788e-12
cg1279	complement(1173334..1173867)	269.125	-1.53808	1.86919e-12
cg1327	1233198..1233950	325.208	-1.66653	2.69016e-14
cg3303	complement(3153855..3154433)	280.664	-1.76426	2.69016e-14
modA	complement(229709..230515)	152.386	-1.49538	0
cg0538	complement(478985..479302)	243.464	-1.15708	0
moaA	complement(1263153..1264361)	166.691	-1.42344	0
hmp	complement(2999445..3000605)	1271.57	-5.85345	0
cg3242	3103092..3104705	54.7795	-2.1158	0
cg3272	complement(3132385..3133107)	82.4639	-1.32614	0

## Sheet: (g) T15 TPM
					Supplementary Table 7,g. RNA-seq analysis across all targets and time points. Transcript abundance values (TPM) for 15 min Samples without filtering. For each sample, total transcript counts, RPKM, TPM, and CPM values are provided.
Name	Chromosome	Region	Identifier	B1_R1_001 (GE) - Total counts	B1_R1_001 (GE) - RPKM	B1_R1_001 (GE) - TPM	B1_R1_001 (GE) - CPM	B2_R1_001 (GE) - Total counts	B2_R1_001 (GE) - RPKM	B2_R1_001 (GE) - TPM	B2_R1_001 (GE) - CPM	B3_R1_001 (GE) - Total counts	B3_R1_001 (GE) - RPKM	B3_R1_001 (GE) - TPM	B3_R1_001 (GE) - CPM	B4_R1_001 (GE) - Total counts	B4_R1_001 (GE) - RPKM	B4_R1_001 (GE) - TPM	B4_R1_001 (GE) - CPM	B5_R1_001 (GE) - Total counts	B5_R1_001 (GE) - RPKM	B5_R1_001 (GE) - TPM	B5_R1_001 (GE) - CPM	B6_R1_001 (GE) - Total counts	B6_R1_001 (GE) - RPKM	B6_R1_001 (GE) - TPM	B6_R1_001 (GE) - CPM
dnaA	CGbielefeld-CDS-genome-2	1..1575		2842	66.4291	45.5631	128.953	3246	54.6779	53.7486	120.144	2717	94.0618	67.9861	141.264	1869	73.7862	54.6938	116.121	1270	42.943	25.2636	87.9877	1118	41.7502	31.4578	63.9992
cg0002	CGbielefeld-CDS-genome-2	complement(1594..1920)		3	0.337745	0.231656	0.136122	5	0.405664	0.398769	0.185064	2	0.333493	0.241042	0.103986	8	1.52121	1.12759	0.497038	1	0.162863	0.095813	0.0692817	6	1.0792	0.813149	0.343466
dnaN	CGbielefeld-CDS-genome-2	2292..3476		10729	333.316	228.618	486.818	10717	239.938	235.86	396.667	7919	364.381	263.368	411.731	6198	325.222	241.07	385.08	4367	196.261	115.461	302.553	4991	247.723	186.653	285.707
recF	CGbielefeld-CDS-genome-2	3585..4769		2719	84.4707	57.9377	123.372	3202	71.688	70.4696	118.515	2108	96.9966	70.1073	109.601	1528	80.1773	59.4312	94.9343	960	43.1442	25.3819	66.5104	982	48.7406	36.7248	56.214
cg0006	CGbielefeld-CDS-genome-2	4814..5302		758	57.0657	39.1409	34.3935	749	40.6365	39.9459	27.7227	601	67.0147	48.4369	31.2476	517	65.7398	48.7294	32.1211	605	65.8895	38.7631	41.9154	619	74.4525	56.0982	35.4343
gyrB	CGbielefeld-CDS-genome-2	5435..7489		14895	266.836	183.02	675.846	17639	227.722	223.852	652.871	15244	404.475	292.347	792.578	13017	393.863	291.95	808.743	9785	253.582	149.184	677.921	10098	289.015	217.766	578.054
cg0008	CGbielefeld-CDS-genome-2	7830..8798		190	7.21847	4.95108	8.62106	384	10.5136	10.3349	14.213	156	8.77819	6.34471	8.11087	87	5.58267	4.13814	5.40529	103	5.66087	3.33032	7.13601	89	5.40211	4.07036	5.09475
cg0009	CGbielefeld-CDS-genome-2	complement(8795..9466)		222	12.1618	8.34168	10.073	303	11.9624	11.759	11.2149	143	11.603	8.38644	7.43496	105	9.71553	7.20161	6.52363	125	9.90627	5.82791	8.66021	118	10.3279	7.78179	6.75484
cg0010	CGbielefeld-CDS-genome-2	complement(9471..9914)		665	55.1384	37.8189	30.1737	948	56.646	55.6832	35.0882	642	78.8418	56.9853	33.3793	493	69.0416	51.1768	30.63	334	40.062	23.5687	23.1401	474	62.7903	47.311	27.1338
cg0012	CGbielefeld-CDS-genome-2	complement(10104..11177)		64	2.19377	1.50469	2.90394	101	2.49494	2.45254	3.7383	32	1.62461	1.17424	1.66377	29	1.67896	1.24452	1.80176	21	1.04132	0.612614	1.45492	49	2.68342	2.02189	2.80497
cg0013	CGbielefeld-CDS-genome-2	complement(11260..11523)		19	2.64951	1.81727	0.862106	14	1.40691	1.383	0.518181	5	1.03269	0.746409	0.259964	13	3.06187	2.2696	0.807687	8	1.61382	0.949419	0.554253	11	2.45068	1.84653	0.629688
cg0014	CGbielefeld-CDS-genome-2	complement(11520..11768)		15	2.21772	1.52111	0.68061	24	2.55715	2.51368	0.88831	12	2.62776	1.8993	0.623913	10	2.49717	1.85102	0.621298	12	2.56656	1.50992	0.83138	18	4.25178	3.20361	1.0304
gyrA	CGbielefeld-CDS-genome-2	11831..14401		7148	102.352	70.2025	324.334	7227	74.5761	73.3086	267.492	6526	138.404	100.036	339.305	5782	139.837	103.654	359.234	4881	101.106	59.4811	338.164	6441	147.349	111.024	368.711
cg0016	CGbielefeld-CDS-genome-2	14405..14749		572	61.0368	41.8646	25.9539	820	63.0578	61.986	30.3506	503	79.4974	57.4592	26.1524	441	79.4815	58.9154	27.3992	450	69.4645	40.8663	31.1768	448	76.3759	57.5474	25.6455
tRNA_3528	CGbielefeld-CDS-genome-2	14851..14927		0	0	0	0	0	0	0	0	0	0	0	0	0	0	0	0	0	0	0	0	0	0	0	0
tRNA_3529	CGbielefeld-CDS-genome-2	14939..15011		0	0	0	0	0	0	0	0	0	0	0	0	0	0	0	0	0	0	0	0	0	0	0	0
cg0018	CGbielefeld-CDS-genome-2	complement(15206..16243)		89	3.15651	2.16502	4.03829	121	3.09266	3.04009	4.47856	59	3.09927	2.24009	3.06757	82	4.91205	3.64104	5.09464	67	3.43753	2.02232	4.64187	100	5.66631	4.26943	5.72444
cg0019	CGbielefeld-CDS-genome-2	16314..17210		138	5.66372	3.88469	6.26162	226	6.68436	6.57075	8.36491	112	6.80816	4.92081	5.82319	109	7.5558	5.60072	6.77215	95	5.64028	3.3182	6.58176	155	10.1633	7.65784	8.87288
cg0021	CGbielefeld-CDS-genome-2	17251..17673		137	11.9233	8.17806	6.21624	255	15.9935	15.7217	9.43829	95	12.2458	8.85104	4.93931	92	13.5237	10.0244	5.71594	81	10.198	5.99952	5.61182	111	15.4341	11.6292	6.35413
cg0025	CGbielefeld-CDS-genome-2	complement(17857..18729)		867	36.5612	25.077	39.3393	1017	30.9065	30.3812	37.6421	832	51.9653	37.5595	43.258	498	35.47	26.2921	30.9406	489	29.8307	17.5496	33.8787	388	26.1406	19.6963	22.2108
cg0026	CGbielefeld-CDS-genome-2	complement(18733..19479)		1027	50.6133	34.7152	46.5991	1308	46.4548	45.6653	48.4129	812	59.2706	42.8397	42.2181	463	38.5396	28.5673	28.7661	515	36.7161	21.6002	35.6801	340	26.7704	20.1709	19.4631
cg0027	CGbielefeld-CDS-genome-2	19705..20076		108	10.688	7.33079	4.90039	110	7.84501	7.71167	4.07142	58	8.50138	6.14463	3.01558	29	4.84732	3.59306	1.80176	34	4.86749	2.86357	2.35558	38	6.00811	4.52697	2.17529
cg0029	CGbielefeld-CDS-genome-2	20199..21068		222	9.39396	6.44323	10.073	265	8.0811	7.94375	9.80842	209	13.0988	9.46756	10.8665	136	9.72	7.20492	8.44965	154	9.42694	5.54592	10.6694	115	7.77456	5.85795	6.5831
cg0031	CGbielefeld-CDS-genome-2	complement(21071..21247)		12	2.49588	1.7119	0.544488	14	2.09845	2.06278	0.518181	10	3.08057	2.22658	0.519928	7	2.45907	1.82278	0.434908	13	3.91147	2.30114	0.900662	4	1.32918	1.00151	0.228978
cg0033	CGbielefeld-CDS-genome-2	21426..21527		0	0	0	0	0	0	0	0	0	0	0	0	0	0	0	0	0	0	0	0	0	0	0	0
cg0034	CGbielefeld-CDS-genome-2	21597..22127		68	4.71443	3.23359	3.08543	70	3.49742	3.43797	2.5909	47	4.82622	3.4883	2.44366	52	6.08913	4.51355	3.23075	39	3.91147	2.30114	2.70199	43	4.7629	3.58873	2.46151
cg0035	CGbielefeld-CDS-genome-2	22164..23402		575	17.0849	11.7184	26.0901	625	13.383	13.1555	23.1331	444	19.5396	14.1229	23.0848	404	20.2748	15.0286	25.1004	409	17.5801	10.3425	28.3362	483	22.9284	17.276	27.649
tRNA_3530	CGbielefeld-CDS-genome-2	23500..23572		0	0	0	0	1	0.36343	0.357253	0.0370129	0	0	0	0	0	0	0	0	0	0	0	0	0	0	0	0
tnp22a(ISCg22a)	CGbielefeld-CDS-genome-2	complement(23612..23779)		4	0.876528	0.601202	0.181496	6	0.947514	0.93141	0.222077	3	0.97368	0.703757	0.155978	1	0.370116	0.274347	0.0621298	3	0.951002	0.559479	0.207845	3	1.05029	0.791368	0.171733
tRNA_3531	CGbielefeld-CDS-genome-2	23903..23979		0	0	0	0	0	0	0	0	0	0	0	0	0	0	0	0	0	0	0	0	0	0	0	0
tRNA_3532	CGbielefeld-CDS-genome-2	23991..24063		0	0	0	0	0	0	0	0	0	0	0	0	0	0	0	0	0	0	0	0	0	0	0	0
cg0038	CGbielefeld-CDS-genome-2	24214..24732		91	6.4549	4.42735	4.12904	74	3.78275	3.71846	2.73895	56	5.88335	4.25238	2.91159	52	6.22992	4.61791	3.23075	47	4.82281	2.83728	3.25624	62	7.02622	5.29409	3.54915
cg0039	CGbielefeld-CDS-genome-2	complement(24882..26573)		378	8.22444	5.64107	17.1514	442	6.93052	6.81272	16.3597	299	9.63552	6.96437	15.5458	225	8.26854	6.12903	13.9792	298	9.37962	5.51808	20.6459	443	15.3993	11.603	25.3593
cg0040	CGbielefeld-CDS-genome-2	complement(26819..28099)		27	0.775943	0.532212	1.2251	46	0.952692	0.936499	1.70259	28	1.19183	0.86143	1.4558	24	1.16495	0.863518	1.49111	25	1.03935	0.611453	1.73204	47	2.15797	1.62598	2.69049
cg0041	CGbielefeld-CDS-genome-2	complement(28161..29117)		5	0.192342	0.131925	0.22687	9	0.249502	0.245261	0.333116	22	1.25347	0.905986	1.14384	6	0.38984	0.288967	0.372779	7	0.389543	0.22917	0.484972	19	1.16772	0.87985	1.08764
cg0042	CGbielefeld-CDS-genome-2	complement(29114..29965)		6	0.259255	0.17782	0.272244	6	0.186834	0.183658	0.222077	1	0.0639977	0.0462563	0.0519928	2	0.145961	0.108193	0.12426	2	0.125014	0.0735466	0.138563	3	0.207099	0.156044	0.171733
cg0043	CGbielefeld-CDS-genome-2	29995..30654		20	1.11558	0.765167	0.907481	39	1.56771	1.54106	1.4435	19	1.56969	1.13454	0.987862	11	1.03632	0.768172	0.683428	20	1.61382	0.949419	1.38563	16	1.42585	1.07434	0.91591
cg0044	CGbielefeld-CDS-genome-2	30697..31680		241	9.01648	6.18432	10.9351	256	6.90222	6.7849	9.4753	176	9.75263	7.04902	9.15072	161	10.1737	7.5412	10.0029	161	8.71365	5.12629	11.1544	240	14.3454	10.8089	13.7387
cg0045	CGbielefeld-CDS-genome-2	31677..32702		123	4.4134	3.02711	5.58101	169	4.37002	4.29574	6.25518	172	9.14082	6.60681	8.94275	173	10.4844	7.77156	10.7485	108	5.60591	3.29798	7.48242	165	9.45875	7.12694	9.44532
cg0046	CGbielefeld-CDS-genome-2	32699..33460		258	12.4646	8.54938	11.7065	261	9.08718	8.93273	9.66037	839	60.0359	43.3928	43.6219	1031	84.1299	62.361	64.0558	317	22.1551	13.034	21.9623	414	31.9553	24.0775	23.6992
cg0047	CGbielefeld-CDS-genome-2	complement(33462..34274)		551	24.9503	17.1132	25.0011	1183	38.6045	37.9484	43.7863	1825	122.399	88.4674	94.8868	2095	160.229	118.769	130.162	612	40.0895	23.5848	42.4004	1122	81.1708	61.1602	64.2282
ppiA	CGbielefeld-CDS-genome-2	34378..34902		4767	334.273	229.275	216.298	6213	313.968	308.632	229.961	4623	480.141	347.037	240.363	3670	434.664	322.193	228.016	2748	278.758	163.995	190.386	5065	567.437	427.55	289.943
cg0049	CGbielefeld-CDS-genome-2	34982..35671		267	14.2455	9.77085	12.1149	237	9.11261	8.95773	8.77206	218	17.2271	12.4514	11.3344	166	14.9591	11.0884	10.3135	106	8.18137	4.81314	7.34386	155	13.2123	9.95519	8.87288
cg0051	CGbielefeld-CDS-genome-2	complement(36244..37242)		48	1.76885	1.21324	2.17795	60	1.59342	1.56633	2.22077	34	1.85574	1.3413	1.76775	21	1.30707	0.968865	1.30473	40	2.13238	1.25449	2.77127	35	2.06063	1.55263	2.00355
cg0052	CGbielefeld-CDS-genome-2	37182..38201		46	1.66025	1.13875	2.08721	66	1.71667	1.6875	2.44285	53	2.83322	2.0478	2.75562	40	2.43841	1.80746	2.48519	49	2.55838	1.50511	3.3948	51	2.94081	2.21583	2.91946
cg0053	CGbielefeld-CDS-genome-2	38202..38981		22	1.03835	0.712194	0.998229	24	0.81632	0.802445	0.88831	25	1.74763	1.26315	1.29982	10	0.797172	0.590901	0.621298	14	0.955879	0.562348	0.969944	8	0.603244	0.45453	0.457955
cg0054	CGbielefeld-CDS-genome-2	38978..39802		36	1.60644	1.10184	1.63346	69	2.21891	2.18119	2.55389	21	1.38794	1.00317	1.09185	27	2.03496	1.50841	1.6775	21	1.35561	0.797512	1.45492	9	0.641632	0.483454	0.515199
cg0055	CGbielefeld-CDS-genome-2	complement(40186..40458)		699	94.2605	64.6524	31.7164	1008	97.9584	96.2934	37.309	686	137.014	99.0313	35.667	546	124.359	92.1806	33.9229	658	128.361	75.5154	45.5873	502	108.153	81.4907	28.7367
pknB	CGbielefeld-CDS-genome-2	complement(40573..42513)		2137	40.5316	27.8003	96.9643	2273	31.0683	30.5403	84.1303	1703	47.8402	34.578	88.5437	1699	54.427	40.3439	105.558	1365	37.4521	22.0333	94.5695	1906	57.7557	43.5175	109.108
pknA	CGbielefeld-CDS-genome-2	complement(42510..43919)		1616	42.1927	28.9396	73.3244	1923	36.1829	35.568	71.1758	1393	53.8687	38.9352	72.4259	1380	60.8564	45.1097	85.7391	1254	47.3639	27.8644	86.8792	1865	77.796	58.6174	106.761
pbpA	CGbielefeld-CDS-genome-2	complement(43923..45347)		2145	55.415	38.0087	97.3273	2251	41.9087	41.1964	83.316	1865	71.3622	51.5792	96.9665	1942	84.7385	62.8122	120.656	1702	63.6083	37.4211	117.917	2508	103.517	77.9973	143.569
rodA	CGbielefeld-CDS-genome-2	complement(45344..46669)		2533	70.3245	48.2349	114.932	2594	51.9003	51.0182	96.0115	2123	87.2993	63.0983	110.381	2202	103.257	76.5391	136.81	2287	91.8527	54.0374	158.447	3271	145.089	109.321	187.246
ppp	CGbielefeld-CDS-genome-2	complement(46666..48021)		3807	103.357	70.8913	172.739	3703	72.4499	71.2185	137.059	3466	139.371	100.735	180.207	3363	154.21	114.308	208.942	2763	108.515	63.84	191.425	4361	189.158	142.526	249.643
cg0063	CGbielefeld-CDS-genome-2	complement(48021..48485)		1636	129.523	88.8383	74.2319	1993	113.71	111.777	73.7667	1263	148.1	107.044	65.6668	1346	179.986	133.414	83.6267	1080	123.692	72.7684	74.8242	1358	171.769	129.424	77.7379
cg0064	CGbielefeld-CDS-genome-2	complement(48502..49398)		4137	169.788	116.456	187.712	4468	132.149	129.903	165.374	3621	220.11	159.092	188.266	3838	266.047	197.207	238.454	3704	219.911	129.375	256.619	5012	328.637	247.62	286.909
tRNA_3533	CGbielefeld-CDS-genome-2	49705..49791		0	0	0	0	0	0	0	0	0	0	0	0	0	0	0	0	0	0	0	0	0	0	0	0
cg0065	CGbielefeld-CDS-genome-2	complement(49894..50616)		861	43.841	30.0701	39.067	838	30.7503	30.2277	31.0168	496	37.4065	27.0367	25.7884	659	56.6753	42.0104	40.9435	563	41.4705	24.3973	39.0056	901	73.2966	55.2272	51.5772
cg0066	CGbielefeld-CDS-genome-2	complement(50963..51436)		437	33.9405	23.2795	19.8284	559	31.288	30.7562	20.6902	345	39.6867	28.6848	17.9375	262	34.3692	25.4761	16.278	326	36.6276	21.5482	22.5858	400	49.634	37.398	22.8978
gabD3	CGbielefeld-CDS-genome-2	complement(51623..53095)		399	9.97207	6.83975	18.1042	530	9.5459	9.38365	19.6168	351	12.993	9.39107	18.2495	306	12.9171	9.57477	19.0117	370	13.3773	7.86993	25.6342	490	19.5655	14.7421	28.0497
cg0070	CGbielefeld-CDS-genome-2	53055..54011		25	0.961708	0.659626	1.13435	42	1.16434	1.14455	1.55454	27	1.53835	1.11189	1.4038	25	1.62433	1.20403	1.55324	38	2.11466	1.24407	2.6327	45	2.76565	2.08385	2.576
cg0071	CGbielefeld-CDS-genome-2	54179..55549		22	0.590745	0.405187	0.998229	66	1.27717	1.25547	2.44285	39	1.55107	1.12108	2.02772	28	1.26989	0.941304	1.73963	12	0.466137	0.274231	0.83138	37	1.58731	1.196	2.11804
cg0072	CGbielefeld-CDS-genome-2	complement(55626..56372)		133	6.5546	4.49574	6.03475	94	3.3385	3.28175	3.47921	110	8.02927	5.80341	5.7192	122	10.1551	7.52746	7.57983	123	8.76908	5.15889	8.52165	159	12.5191	9.43286	9.10186
cg0073	CGbielefeld-CDS-genome-2	complement(56383..56676)		29	3.63133	2.4907	1.31585	21	1.89503	1.86282	0.777271	21	3.89472	2.81503	1.09185	20	4.22989	3.13539	1.2426	11	1.99258	1.17224	0.762099	20	4.00111	3.01474	1.14489
cg0074	CGbielefeld-CDS-genome-2	complement(56677..57270)		29	1.79733	1.23277	1.31585	31	1.38458	1.36105	1.1474	15	1.37692	0.995212	0.779891	11	1.15147	0.853524	0.683428	23	2.0621	1.21315	1.59348	22	2.17838	1.64136	1.25938
cg0075	CGbielefeld-CDS-genome-2	57397..57654		20	2.85381	1.9574	0.907481	38	3.90758	3.84116	1.40649	45	9.51036	6.87391	2.33967	35	8.43519	6.25256	2.17454	30	6.19257	3.64312	2.07845	36	8.20692	6.18372	2.0608
cg0076	CGbielefeld-CDS-genome-2	58087..58944		43	1.845	1.26547	1.95108	95	2.93751	2.88759	3.51623	46	2.92331	2.11291	2.39167	32	2.31905	1.71899	1.98815	37	2.29659	1.3511	2.56342	81	5.55258	4.18374	4.6368
cg0077	CGbielefeld-CDS-genome-2	59091..59933		24	1.04809	0.718876	1.08898	57	1.79387	1.76338	2.10974	21	1.3583	0.981754	1.09185	18	1.32767	0.984134	1.11834	30	1.89523	1.11498	2.07845	31	2.16288	1.62967	1.77458
cg0078	CGbielefeld-CDS-genome-2	59952..60665		40	2.06242	1.41459	1.81496	48	1.78356	1.75324	1.77662	17	1.29824	0.938343	0.883877	25	2.17715	1.61381	1.55324	20	1.49177	0.877615	1.38563	23	1.89464	1.42757	1.31662
cg0079	CGbielefeld-CDS-genome-2	60699..62324		60	1.35846	0.931753	2.72244	190	3.10011	3.04742	7.03245	67	2.24677	1.62392	3.48351	62	2.37092	1.75744	3.85205	53	1.7359	1.02124	3.67193	63	2.27886	1.71707	3.6064
cg0080	CGbielefeld-CDS-genome-2	complement(62387..63508)		1114	36.5517	25.0705	50.5467	1169	27.6417	27.1719	43.2681	896	43.5431	31.4721	46.5855	804	44.5564	33.0273	49.9523	817	38.7792	22.814	56.6031	828	43.4045	32.7043	47.3984
cg0081	CGbielefeld-CDS-genome-2	complement(63591..64040)		66	5.39941	3.70341	2.99469	235	13.8548	13.6193	8.69803	85	10.2994	7.44419	4.41938	48	6.63247	4.9163	2.98223	121	14.32	8.42451	8.38308	118	15.4229	11.6208	6.75484
cg0082	CGbielefeld-CDS-genome-2	64163..65461		378	10.7127	7.34772	17.1514	421	8.59838	8.45224	15.5824	243	10.2	7.37239	12.6342	165	7.89808	5.85443	10.2514	95	3.89479	2.29132	6.58176	180	8.15006	6.14087	10.304
cg0083	CGbielefeld-CDS-genome-2	complement(65505..66197)		186	9.88086	6.77719	8.43957	294	11.2553	11.064	10.8818	138	10.858	7.84796	7.175	141	12.6512	9.37768	8.7603	141	10.8357	6.37467	9.76872	179	15.1921	11.4469	10.2467
phoH1	CGbielefeld-CDS-genome-2	66699..67976		67	1.93001	1.32377	3.04006	67	1.39087	1.36723	2.47986	63	2.68791	1.94277	3.27554	63	3.06518	2.27206	3.91418	32	1.33349	0.784497	2.21701	55	2.53122	1.90721	3.14844
cg0087	CGbielefeld-CDS-genome-2	complement(68249..68635)		127	12.0811	8.28634	5.7625	175	11.9969	11.793	6.47726	115	16.2028	11.7111	5.97917	96	15.4244	11.4333	5.96446	62	8.53199	5.01941	4.29546	65	9.8787	7.44336	3.72089
citP	CGbielefeld-CDS-genome-2	complement(68718..70298)		10224	238.07	163.29	463.904	5976	100.282	98.5774	221.189	12004	413.998	299.23	624.121	8355	328.595	243.57	519.094	5857	197.293	116.069	405.783	4664	173.51	130.735	266.988
citA	CGbielefeld-CDS-genome-2	70507..72162		352	7.82524	5.36726	15.9717	339	5.43104	5.33873	12.5474	352	11.5901	8.37709	18.3014	293	11.0016	8.15487	18.204	336	10.8056	6.35698	23.2786	438	15.5565	11.7214	25.073
citB	CGbielefeld-CDS-genome-2	72162..72818		349	19.5558	13.4131	15.8355	424	17.1216	16.8306	15.6935	340	28.2175	20.395	17.6775	222	21.0104	15.5739	13.7928	248	20.1028	11.8266	17.1819	348	31.1538	23.4737	19.921
cg0091	CGbielefeld-CDS-genome-2	complement(72815..73729)		425	17.0995	11.7284	19.284	498	14.4395	14.1941	18.4324	413	24.6112	17.7885	21.473	324	22.0176	16.3205	20.13	351	20.4294	12.0187	24.3179	374	24.0407	18.1141	21.4094
cg0092	CGbielefeld-CDS-genome-2	73845..74276		481	40.9899	28.1146	21.8249	568	34.8826	34.2897	21.0233	464	58.565	42.3297	24.1246	273	39.2939	29.1265	16.9614	278	34.2713	20.162	19.2603	394	53.6426	40.4184	22.5543
bioB	CGbielefeld-CDS-genome-2	74491..75495		317	11.612	7.96459	14.3836	392	10.3482	10.1723	14.5091	331	17.9583	12.9799	17.2096	297	18.3754	13.6207	18.4525	171	9.06149	5.33092	11.8472	318	18.6105	14.0226	18.2037
cg0096	CGbielefeld-CDS-genome-2	75507..75746		13	1.9941	1.36774	0.589862	10	1.10543	1.08664	0.370129	11	2.49911	1.80631	0.57192	5	1.2954	0.960215	0.310649	11	2.4409	1.436	0.762099	7	1.71547	1.29257	0.400711
cg0097	CGbielefeld-CDS-genome-2	75746..76039		18	2.25393	1.54595	0.816732	15	1.35359	1.33059	0.555193	15	2.78194	2.01074	0.779891	11	2.32644	1.72447	0.683428	3	0.54343	0.319702	0.207845	13	2.60072	1.95958	0.744177
16S rRNA copy A	CGbielefeld-CDS-genome-2	76644..78167		69	1.66678	1.14323	3.13081	2386	41.5364	40.8305	88.3128	111	3.97139	2.87044	5.7712	391	15.9529	11.825	24.2927	17	0.594064	0.349491	1.17779	380	14.6655	11.0501	21.7529
23S rRNA copy A	CGbielefeld-CDS-genome-2	78556..81642		86518	1031.77	707.685	3925.67	1856957	15959.1	15687.9	68731.4	62898	1110.98	802.992	3270.24	77572	1562.48	1158.18	4819.53	58250	1004.91	591.196	4035.66	104551	1992	1500.92	5984.96
5S rRNA copy A	CGbielefeld-CDS-genome-2	81755..81874		0	0	0	0	0	0	0	0	1	0.454384	0.32842	0.0519928	0	0	0	0	0	0	0	0	0	0	0	0
cg0103	CGbielefeld-CDS-genome-2	complement(82118..83569)		75	1.90156	1.30426	3.40305	128	2.33877	2.29902	4.73765	55	2.06538	1.49282	2.8596	90	3.8541	2.85684	5.59168	40	1.46711	0.863109	2.77127	49	1.98485	1.49553	2.80497
codA	CGbielefeld-CDS-genome-2	complement(83689..84960)		74	2.14171	1.46898	3.35768	91	1.89801	1.86575	3.36817	54	2.31479	1.67308	2.80761	57	2.78634	2.06537	3.5414	36	1.50725	0.886722	2.49414	57	2.63563	1.98589	3.26293
cg0105	CGbielefeld-CDS-genome-2	complement(85096..85404)		90	10.7226	7.35452	4.08366	129	11.0758	10.8875	4.77466	56	9.88175	7.14234	2.91159	51	10.2626	7.60714	3.16862	31	5.34285	3.14322	2.14773	29	5.51997	4.15917	1.66009
cg0107	CGbielefeld-CDS-genome-2	complement(85661..86221)		1735	113.855	78.092	78.7239	2844	134.496	132.21	105.265	1404	136.461	98.6314	72.9978	1033	114.494	84.8686	64.1801	881	83.6339	49.2023	61.0372	1164	122.036	91.9511	66.6325
cg0108	CGbielefeld-CDS-genome-2	86412..87245		185	8.16622	5.60113	8.39419	300	9.54331	9.38111	11.1039	140	9.15306	6.61566	7.27899	109	8.12657	6.02379	6.77215	117	7.47118	4.39533	8.10596	150	10.5785	7.97062	8.58666
cg0109	CGbielefeld-CDS-genome-2	complement(87559..88533)		248	9.36402	6.42269	11.2528	539	14.6665	14.4173	19.95	233	13.0303	9.41808	12.1143	211	13.4563	9.97441	13.1094	280	15.2941	8.99757	19.3989	308	18.5799	13.9995	17.6313
cg0110	CGbielefeld-CDS-genome-2	complement(88543..89445)		22	0.896913	0.615184	0.998229	36	1.05769	1.03971	1.33246	20	1.20766	0.872877	1.03986	16	1.10174	0.816661	0.994076	17	1.00261	0.589839	1.17779	17	1.10728	0.834311	0.973155
cg0111	CGbielefeld-CDS-genome-2	89598..90449		102	4.40733	3.02295	4.62815	125	3.89237	3.82621	4.62661	96	6.14378	4.44061	4.9913	92	6.71421	4.97689	5.71594	122	7.62587	4.48634	8.45237	66	4.55619	3.43298	3.77813
ureR	CGbielefeld-CDS-genome-2	complement(90459..90974)		104	7.41991	5.08925	4.7189	164	8.43214	8.28882	6.07012	90	9.51036	6.87391	4.67935	49	5.90463	4.37679	3.04436	71	7.32787	4.31103	4.919	93	10.6006	7.9873	5.32373
ureA	CGbielefeld-CDS-genome-2	91175..91477		53	6.43944	4.41675	2.40482	72	6.30425	6.1971	2.66493	35	6.29839	4.55236	1.81975	17	3.48861	2.58592	1.05621	31	5.44864	3.20547	2.14773	36	6.98807	5.26534	2.0608
ureB	CGbielefeld-CDS-genome-2	91504..91992		52	3.9148	2.68512	2.35945	100	5.42544	5.33323	3.70129	66	7.35935	5.3192	3.43152	50	6.35781	4.71271	3.10649	55	5.98995	3.52392	3.81049	67	8.05867	6.07201	3.83537
ureC	CGbielefeld-CDS-genome-2	91993..93705		319	6.85565	4.70222	14.4743	351	5.43618	5.34378	12.9915	246	7.83036	5.65964	12.7902	196	7.11452	5.27361	12.1774	210	6.52877	3.84091	14.5492	255	8.75548	6.59705	14.5973
ureE	CGbielefeld-CDS-genome-2	93730..94203		74	5.74736	3.94206	3.35768	98	5.48519	5.39196	3.62726	67	7.70727	5.57067	3.48351	50	6.55901	4.86185	3.10649	67	7.52776	4.42862	4.64187	92	11.4158	8.60154	5.26648
ureF	CGbielefeld-CDS-genome-2	94203..94883		104	5.62214	3.85617	4.7189	142	5.53204	5.43801	5.25583	126	10.0885	7.29179	6.55109	105	9.58713	7.10643	6.52363	111	8.68051	5.10679	7.69027	176	15.2007	11.4533	10.075
ureG	CGbielefeld-CDS-genome-2	94900..95517		78	4.64645	3.18696	3.53917	89	3.82072	3.75578	3.29415	61	5.38202	3.89002	3.17156	45	4.52763	3.35609	2.79584	60	5.1705	3.04183	4.1569	97	9.23168	6.95585	5.55271
ureD	CGbielefeld-CDS-genome-2	95518..96369		119	5.14189	3.52677	5.39951	149	4.63971	4.56085	5.51492	93	5.95179	4.30184	4.83533	95	6.93315	5.13918	5.90233	90	5.62564	3.3096	6.23535	139	9.59561	7.23006	7.95697
cg0120	CGbielefeld-CDS-genome-2	complement(96366..97145)		97	4.57817	3.14013	4.40128	135	4.5918	4.51375	4.99674	79	5.52251	3.99157	4.10743	83	6.61653	4.90448	5.15677	110	7.51048	4.41845	7.62099	116	8.74703	6.59068	6.64035
cg0121	CGbielefeld-CDS-genome-2	complement(97317..98471)		124	3.95235	2.71088	5.62638	204	4.68589	4.60624	7.55063	130	6.13713	4.4358	6.75906	113	6.08335	4.50927	7.02067	119	5.48699	3.22803	8.24452	126	6.41632	4.83454	7.21279
cg0122	CGbielefeld-CDS-genome-2	complement(98806..101583)		839	11.1185	7.62605	38.0688	1023	9.76983	9.60378	37.8642	711	13.9554	10.0867	36.9668	584	13.0716	9.68925	36.2838	502	9.62367	5.66166	34.7794	647	13.6984	10.3214	37.0371
cg0123	CGbielefeld-CDS-genome-2	complement(101610..103436)		504	10.1556	6.96566	22.8685	745	10.8184	10.6345	27.5746	465	13.8777	10.0306	24.1766	381	12.9668	9.61161	23.6714	322	9.38613	5.52191	22.3087	419	13.4888	10.1635	23.9854
amn	CGbielefeld-CDS-genome-2	103480..104913		227	5.82763	3.99712	10.2999	273	5.05077	4.96492	10.1045	179	6.80625	4.91943	9.3067	173	7.50142	5.56041	10.7485	110	4.0852	2.40334	7.62099	208	8.53123	6.42808	11.9068
cg0126	CGbielefeld-CDS-genome-2	complement(105171..105752)		38	2.40368	1.64866	1.72421	61	2.78068	2.73342	2.25779	61	5.71493	4.13064	3.17156	24	2.5641	1.90063	1.49111	32	2.92817	1.72266	2.21701	44	4.44659	3.3504	2.51875
cg0127	CGbielefeld-CDS-genome-2	complement(105839..106393)		27	1.79096	1.2284	1.2251	48	2.29452	2.25552	1.77662	25	2.45613	1.77524	1.29982	18	2.01663	1.49482	1.11834	17	1.63127	0.959683	1.17779	26	2.75536	2.07609	1.48835
cg0128	CGbielefeld-CDS-genome-2	complement(106628..107179)		12	0.800308	0.548924	0.544488	23	1.10543	1.08664	0.851297	15	1.48169	1.07094	0.779891	11	1.23908	0.918466	0.683428	6	0.578871	0.340553	0.41569	18	1.91792	1.44511	1.0304
putA	CGbielefeld-CDS-genome-2	107436..110894		334	3.55477	2.43818	15.1549	459	3.52051	3.46068	16.9889	517	8.14975	5.89048	26.8803	399	7.17247	5.31657	24.7898	419	6.45109	3.79521	29.029	415	7.05659	5.31697	23.7564
cg0131	CGbielefeld-CDS-genome-2	111375..112322		83	3.22318	2.21075	3.76604	168	4.70159	4.62168	6.21817	80	4.60136	3.32577	4.15942	83	5.44398	4.03533	5.15677	115	6.46039	3.80068	7.96739	200	12.4085	9.3495	11.4489
cg0133	CGbielefeld-CDS-genome-2	112564..114087		133	3.21279	2.20362	6.03475	115	2.00197	1.96794	4.25648	86	3.07693	2.22395	4.47138	96	3.91681	2.90333	5.96446	91	3.17999	1.8708	6.30463	141	5.44166	4.10016	8.07146
cg0134	CGbielefeld-CDS-genome-2	114094..115482		108	2.86244	1.96332	4.90039	160	3.05606	3.00411	5.92206	105	4.12184	2.97919	5.45924	83	3.71554	2.75414	5.15677	95	3.64243	2.14286	6.58176	108	4.57319	3.44579	6.18239
cg0135	CGbielefeld-CDS-genome-2	115579..115947		114	11.3735	7.80097	5.17264	174	12.5103	12.2976	6.44024	104	15.3678	11.1075	5.40725	75	12.6381	9.36795	4.65973	104	15.0098	8.83037	7.2053	80	12.7515	9.60794	4.57955
cg0136	CGbielefeld-CDS-genome-2	115950..116267		153	17.7125	12.1488	6.94223	185	15.4343	15.172	6.84739	111	19.0327	13.7565	5.7712	62	12.123	8.98616	3.85205	76	12.7279	7.48787	5.26541	93	17.201	12.9605	5.32373
cg0138	CGbielefeld-CDS-genome-2	complement(116546..118501)		1034	19.4611	13.3482	46.9167	1347	18.2702	17.9596	49.8564	899	25.0608	18.1135	46.7415	840	26.7028	19.7934	52.189	656	17.8609	10.5077	45.4488	806	24.2361	18.2614	46.139
cg0139	CGbielefeld-CDS-genome-2	complement(118808..119590)		1031	48.4744	33.2481	46.7806	1381	46.7924	45.9971	51.1148	1010	70.3338	50.8359	52.5127	894	70.9941	52.6242	55.544	796	54.1403	31.851	55.1482	1223	91.8675	69.22	70.0099
cg0141	CGbielefeld-CDS-genome-2	119971..120414		131	10.8618	7.45004	5.944	274	16.3724	16.0941	10.1415	143	17.5613	12.693	7.43496	85	11.9037	8.82359	5.28103	112	13.434	7.90327	7.75955	132	17.4859	13.1752	7.55626
sixA	CGbielefeld-CDS-genome-2	complement(120411..120923)		117	8.39622	5.75889	5.30876	235	12.1533	11.9467	8.69803	143	15.1993	10.9857	7.43496	82	9.93901	7.36726	5.09464	99	10.2775	6.0463	6.85889	98	11.2359	8.46595	5.60995
mtlD	CGbielefeld-CDS-genome-2	complement(120949..122460)		86	2.09393	1.43621	3.90217	113	1.98276	1.94906	4.18246	73	2.63254	1.90275	3.79547	55	2.26182	1.67657	3.41714	86	3.02912	1.78205	5.95822	63	2.45068	1.84653	3.6064
rbtT	CGbielefeld-CDS-genome-2	complement(122505..123842)		63	1.7334	1.18892	2.85856	117	2.31992	2.28049	4.33051	57	2.32286	1.67892	2.96359	46	2.13771	1.58457	2.85797	52	2.06974	1.21764	3.60265	96	4.22	3.17967	5.49546
cg0146	CGbielefeld-CDS-genome-2	124122..124970		326	14.136	9.69572	14.7919	348	10.8746	10.6898	12.8805	226	14.5146	10.4909	11.7504	163	11.9379	8.8489	10.1272	157	9.8483	5.79381	10.8772	146	10.1145	7.621	8.35768
xylB	CGbielefeld-CDS-genome-2	124972..126354		980	26.0867	17.8926	44.4665	1062	20.3726	20.0263	39.3077	809	31.8956	23.0535	42.0621	617	27.7402	20.5623	38.3341	589	22.681	13.3434	40.8069	552	23.4755	17.6882	31.5989
panC	CGbielefeld-CDS-genome-2	complement(126351..127190)		535	23.4471	16.0822	24.2751	548	17.3079	17.0138	20.2831	593	38.4928	27.8219	30.8317	467	34.5688	25.624	29.0146	321	20.3514	11.9729	22.2394	324	22.6863	17.0936	18.5472
panB	CGbielefeld-CDS-genome-2	complement(127190..128005)		876	39.5211	27.1072	39.7476	876	28.4812	27.9971	32.4233	965	64.4824	46.6067	50.173	713	54.3308	40.2725	44.2985	623	40.66	23.9205	43.1625	769	55.4285	41.7641	44.0209
cg0150	CGbielefeld-CDS-genome-2	complement(128097..129050)		109	4.20623	2.88502	4.94577	227	6.31279	6.20549	8.40193	73	4.17233	3.01568	3.79547	82	5.34456	3.96164	5.09464	76	4.24262	2.49596	5.26541	134	8.2614	6.22477	7.67075
mag	CGbielefeld-CDS-genome-2	complement(129487..130056)		53	3.42307	2.34785	2.40482	125	5.81807	5.71918	4.62661	51	4.87865	3.52619	2.65163	40	4.36347	3.23441	2.48519	33	3.08325	1.81389	2.2863	63	6.50074	4.89815	3.6064
cg0152	CGbielefeld-CDS-genome-2	130146..130802		50	2.80169	1.92165	2.2687	96	3.87659	3.8107	3.55324	71	5.89247	4.25896	3.69149	55	5.20528	3.8584	3.41714	49	3.97192	2.3367	3.3948	67	5.998	4.51935	3.83537
hde	CGbielefeld-CDS-genome-2	complement(130813..131739)		59	2.34308	1.6071	2.67707	102	2.9192	2.86959	3.77532	101	5.94081	4.29391	5.25127	71	4.76239	3.53011	4.41121	60	3.447	2.02789	4.1569	60	3.80688	2.86839	3.43466
cg0154	CGbielefeld-CDS-genome-2	131823..132428		104	6.31795	4.33342	4.7189	201	8.79969	8.65012	7.43959	112	10.0774	7.28377	5.82319	117	12.0049	8.89862	7.26918	114	10.0185	5.89392	7.89811	177	17.179	12.944	10.1323
cg0155	CGbielefeld-CDS-genome-2	132425..132985		158	10.3683	7.11155	7.1691	260	12.2957	12.0867	9.62335	130	12.6353	9.13254	6.75906	113	12.5246	9.28379	7.02067	138	13.1004	7.70705	9.56087	149	15.6214	11.7704	8.52941
cg0156	CGbielefeld-CDS-genome-2	complement(132969..134114)		1190	38.2276	26.22	53.9951	2277	52.7135	51.8176	84.2784	574	27.3106	19.7396	29.8438	750	40.6933	30.1638	46.5973	909	42.2424	24.8514	62.9771	900	46.1908	34.8036	51.5199
cg0158	CGbielefeld-CDS-genome-2	complement(134205..135479)		498	14.3792	9.86255	22.5963	655	13.6293	13.3977	24.2434	424	18.1326	13.1059	22.0449	320	15.6058	11.5678	19.8815	292	12.1967	7.17538	20.2303	407	18.7751	14.1466	23.2985
cg0159	CGbielefeld-CDS-genome-2	complement(135516..136034)		9	0.638396	0.43787	0.408366	5	0.255591	0.251247	0.185064	6	0.630359	0.455612	0.311957	1	0.119806	0.088806	0.0621298	0	0	0	0	3	0.339978	0.256166	0.171733
cg0160	CGbielefeld-CDS-genome-2	complement(136120..136566)		4	0.329433	0.225955	0.181496	10	0.593521	0.583433	0.370129	3	0.365947	0.264499	0.155978	4	0.556415	0.412441	0.248519	2	0.238282	0.140183	0.138563	8	1.05264	0.793139	0.457955
cg0161	CGbielefeld-CDS-genome-2	136805..138748		2070	39.2003	26.8871	93.9242	2209	30.1469	29.6345	81.7615	1763	49.4493	35.741	91.6632	1739	55.6224	41.23	108.044	1289	35.3123	20.7744	89.3041	2118	64.0807	48.2832	121.244
cg0162	CGbielefeld-CDS-genome-2	138792..140333		1255	29.9623	20.5508	56.9444	1417	24.3797	23.9654	52.4473	1156	40.8769	29.545	60.1036	1332	53.7114	39.8134	82.7569	986	34.0535	20.0339	68.3117	1805	68.8478	51.8752	103.326
cg0163	CGbielefeld-CDS-genome-2	140330..141793		1043	26.2276	17.9893	47.3251	1158	20.9851	20.6284	42.8609	965	35.941	25.9775	50.173	988	41.9626	31.1047	61.3842	823	29.9384	17.6129	57.0188	1517	60.9455	45.921	86.8397
cg0165	CGbielefeld-CDS-genome-2	141797..143530		1385	29.4046	20.1684	62.843	1307	19.9972	19.6574	48.3759	1008	31.6968	22.9099	52.4087	1114	39.9469	29.6105	69.2126	943	28.9622	17.0386	65.3326	1597	54.1693	40.8153	91.4193
cg0166	CGbielefeld-CDS-genome-2	143576..144643		355	12.2369	8.39319	16.1078	477	11.8492	11.6479	17.6552	310	15.8269	11.4394	16.1178	241	14.0311	10.4005	14.9733	260	12.965	7.62736	18.0132	317	17.4576	13.1539	18.1465
cg0167	CGbielefeld-CDS-genome-2	144726..145484		1942	94.1939	64.6067	88.1164	1639	57.2903	56.3165	60.6641	1221	87.7159	63.3994	63.4832	908	74.3859	55.1383	56.4138	759	53.2561	31.3308	52.5848	827	64.0857	48.287	47.3411
cg0168	CGbielefeld-CDS-genome-2	complement(145516..146340)		478	21.3299	14.63	21.6888	658	21.16	20.8004	24.3545	358	23.661	17.1017	18.6134	248	18.6915	13.855	15.4082	183	11.8132	6.94975	12.6785	125	8.91155	6.71464	7.15555
cg0170	CGbielefeld-CDS-genome-2	146523..147242		229	11.709	8.03106	10.3907	180	6.6326	6.51987	6.66232	146	11.0567	7.99156	7.59094	153	13.2131	9.79419	9.50586	164	12.1306	7.13647	11.3622	210	17.1547	12.9257	12.0213
cg0171	CGbielefeld-CDS-genome-2	147239..147574		416	45.5795	31.2625	18.8756	409	32.2944	31.7455	15.1383	373	60.5304	43.7502	19.3933	283	52.3714	38.8201	17.5827	275	43.5876	25.6428	19.0525	378	66.1683	49.8562	21.6384
panD	CGbielefeld-CDS-genome-2	complement(147571..147981)		373	33.4104	22.9159	16.9245	533	34.4056	33.8208	19.7279	253	33.5647	24.2599	13.1542	149	22.5419	16.7091	9.25734	124	16.0675	9.45261	8.59093	177	25.3296	19.0853	10.1323
cg0173	CGbielefeld-CDS-genome-2	148123..149784		7092	157.092	107.748	321.793	8665	138.319	135.968	320.717	5945	195.041	140.972	309.097	4443	166.223	123.213	276.043	2614	83.7614	49.2773	181.102	3379	119.579	90.0998	193.429
cg0174	CGbielefeld-CDS-genome-2	complement(149792..150931)		1189	38.3965	26.3358	53.9497	1704	39.656	38.9819	63.07	1059	50.6519	36.6102	55.0603	893	48.7072	36.1041	55.4819	539	25.1799	14.8134	37.3428	687	35.4445	26.7066	39.3269
cg0175	CGbielefeld-CDS-genome-2	complement(150964..151455)		262	19.6043	13.4464	11.888	289	15.5839	15.319	10.6967	257	28.4821	20.5863	13.3621	300	37.9143	28.1038	18.6389	372	40.2668	23.6892	25.7728	557	66.5867	50.1715	31.8851
cg0176	CGbielefeld-CDS-genome-2	151591..152373		156	7.33463	5.03075	7.07835	163	5.52293	5.42906	6.0331	124	8.63504	6.24124	6.4471	103	8.17941	6.06296	6.39937	112	7.61773	4.48155	7.75955	160	12.0186	9.05576	9.1591
cg0177	CGbielefeld-CDS-genome-2	152441..152818		140	13.6349	9.35204	6.35236	261	18.3186	18.0073	9.66037	100	14.4249	10.426	5.19928	85	13.9821	10.3642	5.28103	85	11.9756	7.04529	5.88894	146	22.7174	17.117	8.35768
hrpB	CGbielefeld-CDS-genome-2	complement(153224..155653)		560	8.48393	5.81905	25.4095	802	8.75612	8.6073	29.6843	523	11.7354	8.48216	27.1922	429	10.9774	8.13693	26.6537	312	6.83782	4.02272	21.6159	339	8.20523	6.18244	19.4058
cg0179	CGbielefeld-CDS-genome-2	155854..156171		120	13.8921	9.52849	5.44488	195	16.2686	15.9921	7.21752	102	17.4895	12.6411	5.30326	82	16.0337	11.8849	5.09464	116	19.4268	11.4289	8.03668	182	33.6621	25.3636	10.4185
maa	CGbielefeld-CDS-genome-2	complement(156145..156831)		192	10.2887	7.05691	8.71181	272	10.504	10.3255	10.0675	152	12.064	8.71962	7.9029	198	17.9207	13.2837	12.3017	177	13.721	8.07214	12.2629	274	23.458	17.675	15.685
cg0181	CGbielefeld-CDS-genome-2	156849..157541		152	8.07468	5.53835	6.89685	170	6.50818	6.39756	6.29219	134	10.5433	7.62048	6.96703	76	6.8191	5.05464	4.72186	67	5.14886	3.0291	4.64187	97	8.23258	6.20305	5.55271
tagA2	CGbielefeld-CDS-genome-2	157585..158142		46	3.03486	2.08158	2.08721	74	3.51837	3.45857	2.73895	421	41.1388	29.7344	21.8889	316	35.2127	26.1013	19.633	27	2.57691	1.51601	1.87061	24	2.52973	1.90609	1.37387
cg0183	CGbielefeld-CDS-genome-2	158155..158835		206	11.1362	7.63818	9.34705	236	9.19409	9.03782	8.73504	760	60.8514	43.9822	39.5145	640	58.4359	43.3154	39.7631	69	5.39599	3.17449	4.78044	125	10.7959	8.13448	7.15555
cg0184	CGbielefeld-CDS-genome-2	158870..159163		568	71.124	48.7833	25.7724	576	51.9779	51.0945	21.3194	656	121.664	87.9362	34.1072	504	106.593	79.0119	31.3134	448	81.1522	47.7422	31.0382	508	101.628	76.5743	29.0801
cg0185	CGbielefeld-CDS-genome-2	159163..160017		1623	69.8824	47.9317	73.642	1926	59.7632	58.7474	71.2868	1647	105.034	75.9169	85.6321	1470	106.905	79.243	91.3308	1225	76.3026	44.8892	84.8701	1300	89.4282	67.382	74.4177
cg0186	CGbielefeld-CDS-genome-2	160030..160374		449	47.9118	32.8622	20.3729	600	46.1398	45.3556	22.2077	430	67.96	49.1202	22.3569	389	70.1095	51.9685	24.1685	363	56.0347	32.9655	25.1493	542	92.4012	69.6221	31.0265
cg0187	CGbielefeld-CDS-genome-2	160549..161364		440	19.8508	13.6155	19.9646	610	19.8328	19.4957	22.5779	425	28.399	20.5263	22.0969	401	30.5563	22.6498	24.914	355	23.169	13.6305	24.595	324	23.3535	17.5963	18.5472
cg0188	CGbielefeld-CDS-genome-2	complement(161361..162275)		465	18.7088	12.8322	21.0989	462	13.3957	13.168	17.1	567	33.7883	24.4215	29.4799	686	46.6176	34.5551	42.621	750	43.6525	25.681	51.9613	1135	72.9579	54.972	64.9724
cg0191	CGbielefeld-CDS-genome-2	162440..162871		27	2.30089	1.57816	1.2251	65	3.99184	3.92399	2.40584	19	2.39814	1.73333	0.987862	25	3.59835	2.66726	1.55324	20	2.46556	1.4505	1.38563	34	4.62906	3.48788	1.94631
cg0192	CGbielefeld-CDS-genome-2	162984..163607		79	4.66077	3.19678	3.58455	201	8.54585	8.4006	7.43959	62	5.41765	3.91578	3.22355	58	5.7795	4.28403	3.60353	60	5.12078	3.01258	4.1569	71	6.69223	5.04244	4.06435
pepO	CGbielefeld-CDS-genome-2	complement(163687..165615)		723	13.7982	9.46403	32.8054	888	12.2131	12.0055	32.8675	609	17.2143	12.4422	31.6636	525	16.9229	12.544	32.6181	551	15.2121	8.94935	38.1742	703	21.4348	16.1506	40.2428
cg0194	CGbielefeld-CDS-genome-2	165718..166461		1056	52.2524	35.8394	47.915	1203	42.8979	42.1688	44.5265	2494	182.78	132.11	129.67	2912	243.369	180.396	180.922	1179	84.3937	49.6493	81.6831	1352	106.881	80.5324	77.3944
cg0195	CGbielefeld-CDS-genome-2	166458..167423		1428	54.421	37.3268	64.7941	1884	51.7425	50.8631	69.7323	2062	116.39	84.1245	107.209	2185	140.644	104.252	135.754	991	54.6344	32.1417	68.6582	871	53.032	39.9584	49.8599
cg0196	CGbielefeld-CDS-genome-2	complement(167835..168596)		3748	181.076	124.198	170.062	4280	149.016	146.483	158.415	3543	253.525	183.243	184.21	2494	203.511	150.852	154.952	1637	114.41	67.3079	113.414	1748	134.922	101.661	100.063
iolC	CGbielefeld-CDS-genome-2	168976..169995		20829	751.767	515.63	945.096	13882	361.073	354.937	513.813	25939	1386.62	1002.22	1348.64	20240	1233.83	914.576	1257.51	11370	593.649	349.247	787.733	15785	910.21	685.822	903.603
cg0198	CGbielefeld-CDS-genome-2	169997..170920		19664	783.457	537.366	892.235	12418	356.552	350.492	459.626	30071	1774.52	1282.59	1563.47	29926	2013.83	1492.75	1859.3	18131	1045.01	614.783	1256.15	27713	1764.04	1329.16	1586.41
msmA	CGbielefeld-CDS-genome-2	170934..172448		20364	494.841	339.407	923.997	16224	284.112	279.283	600.497	30856	1110.53	802.672	1604.29	35353	1450.98	1075.53	2196.47	21271	747.73	439.893	1473.69	25040	972.118	732.468	1433.4
iolB	CGbielefeld-CDS-genome-2	172469..173359		8923	368.679	252.873	404.872	8261	245.979	241.799	305.764	13370	818.197	591.377	695.143	15257	1064.73	789.225	947.914	8835	528.078	310.671	612.104	10901	719.591	542.195	624.021
iolD	CGbielefeld-CDS-genome-2	173366..175279		17600	338.521	232.189	798.583	13923	192.99	189.71	515.331	24142	687.758	497.098	1255.21	30378	986.879	731.521	1887.38	15467	430.362	253.184	1071.58	20488	629.586	474.378	1172.82
iolE	CGbielefeld-CDS-genome-2	175320..176276		8985	345.638	237.07	407.686	6396	177.313	174.299	236.734	11389	648.9	469.013	592.145	14517	943.217	699.157	901.938	7260	404.012	237.682	502.985	10717	658.656	496.281	613.488
iolG	CGbielefeld-CDS-genome-2	176309..177322		6109	221.793	152.126	277.19	5457	142.777	140.351	201.979	7802	419.539	303.235	405.647	8659	530.978	393.586	537.982	5412	284.243	167.221	374.952	6425	372.677	280.803	367.795
iolH	CGbielefeld-CDS-genome-2	177329..178207		3720	155.801	106.862	168.791	3618	109.2	107.344	133.913	5220	323.807	234.041	271.402	5941	420.259	311.516	369.113	3579	216.841	127.569	247.959	4460	298.431	224.86	255.31
cg0206	CGbielefeld-CDS-genome-2	178286..179662		679	18.1531	12.451	30.809	717	13.8143	13.5795	26.5382	782	30.9654	22.3812	40.6583	857	38.6984	28.6851	53.2452	514	19.8792	11.695	35.6108	734	31.3516	23.6227	42.0174
cg0207	CGbielefeld-CDS-genome-2	179690..180715		307	11.0155	7.55546	13.9298	324	8.37802	8.23562	11.9922	358	19.0257	13.7514	18.6134	414	25.0899	18.5978	25.7217	340	17.6482	10.3825	23.5558	500	28.6629	21.5968	28.6222
cg0208	CGbielefeld-CDS-genome-2	180843..181301		344	27.5906	18.9241	15.6087	320	18.4961	18.1818	11.8441	258	30.6486	22.1523	13.4141	255	34.5441	25.6057	15.8431	324	37.5925	22.1159	22.4473	461	59.0725	44.5097	26.3897
cg0209	CGbielefeld-CDS-genome-2	181304..181651		149	15.7624	10.8113	6.76073	162	12.3504	12.1404	5.99609	161	25.2261	18.233	8.37083	131	23.4066	17.3501	8.139	75	11.4776	6.75234	5.19613	135	22.8166	17.1918	7.72799
cg0210	CGbielefeld-CDS-genome-2	complement(181685..182680)		586	21.6597	14.8562	26.5892	635	16.9145	16.627	23.5032	574	31.4237	22.7124	29.8438	358	22.3496	16.5666	22.2425	209	11.1752	6.57444	14.4799	178	10.5113	7.92004	10.1895
cg0211	CGbielefeld-CDS-genome-2	182820..184055		681	20.2835	13.9123	30.8997	626	13.4369	13.2085	23.1701	935	41.2475	29.8129	48.6132	1050	52.8223	39.1544	65.2363	578	24.9046	14.6515	40.0448	1106	52.6301	39.6555	63.3123
cg0212	CGbielefeld-CDS-genome-2	184078..185091		367	13.3243	9.13899	16.6523	359	9.39291	9.23326	13.2876	666	35.813	25.8849	34.6272	928	56.9058	42.1813	57.6564	535	28.0986	16.5306	37.0657	1063	61.6585	46.4582	60.8508
cg0214	CGbielefeld-CDS-genome-2	185215..185646		59	5.02786	3.44856	2.67707	97	5.95706	5.85581	3.59025	47	5.93223	4.28771	2.44366	52	7.48456	5.54791	3.23075	44	5.42423	3.1911	3.04839	55	7.48818	5.64216	3.14844
cspA	CGbielefeld-CDS-genome-2	186509..186712		7402	1335.78	916.197	335.859	7446	968.359	951.901	275.598	7387	1974.43	1427.08	384.07	5967	1818.75	1348.14	370.728	6057	1581.24	930.249	419.639	5115	1474.73	1111.17	292.805
cg0216	CGbielefeld-CDS-genome-2	186770..187306		40	2.74221	1.88086	1.81496	144	7.1143	6.99338	5.32986	37	3.75692	2.71543	1.92373	29	3.35792	2.48905	1.80176	26	2.57851	1.51695	1.80132	37	4.05252	3.05347	2.11804
cg0217	CGbielefeld-CDS-genome-2	187303..187611		58	6.91011	4.73958	2.63169	101	8.67175	8.52436	3.7383	42	7.41131	5.35675	2.1837	23	4.62824	3.43067	1.42898	41	7.06634	4.15717	2.84055	24	4.56825	3.44207	1.37387
cg0218	CGbielefeld-CDS-genome-2	187688..188104		89	7.85722	5.3892	4.03829	136	8.6526	8.50554	5.03375	108	14.1219	10.207	5.61522	85	12.6745	9.3949	5.28103	89	11.3664	6.68692	6.16607	161	22.7084	17.1103	9.21635
cg0219	CGbielefeld-CDS-genome-2	188123..188260		0	0	0	0	0	0	0	0	0	0	0	0	0	0	0	0	0	0	0	0	0	0	0	0
cg0220	CGbielefeld-CDS-genome-2	complement(188298..188726)		59	5.06302	3.47268	2.67707	89	5.50397	5.41043	3.29415	66	8.38863	6.06314	3.43152	68	9.85594	7.30569	4.22483	87	10.8002	6.35381	6.02751	86	11.7907	8.88399	4.92302
cg0221	CGbielefeld-CDS-genome-2	complement(188745..189848)		147	4.90189	3.36216	6.66998	216	5.19073	5.10251	7.99479	139	6.86515	4.962	7.22699	118	6.64599	4.92632	7.33131	104	5.01688	2.95146	7.2053	210	11.1879	8.42979	12.0213
cg0222	CGbielefeld-CDS-genome-2	189921..190325		18	1.63619	1.12224	0.816732	68	4.45449	4.37878	2.51688	17	2.28875	1.65426	0.883877	11	1.68882	1.25184	0.683428	12	1.57796	0.928321	0.83138	34	4.93766	3.72041	1.94631
cg0223	CGbielefeld-CDS-genome-2	complement(190701..192176)		10373	258.722	177.455	470.665	7002	125.858	123.718	259.164	17050	629.857	455.249	886.476	14219	599.003	444.009	883.423	7638	275.59	162.131	529.174	5198	207.132	156.069	297.556
tnp2f(ISCg2f)	CGbielefeld-CDS-genome-2	192954..194468		160	3.88797	2.66672	7.25984	194	3.39729	3.33955	7.1805	112	4.03097	2.91351	5.82319	41	1.68274	1.24733	2.54732	32	1.12488	0.661773	2.21701	127	4.93047	3.71499	7.27004
cg0228	CGbielefeld-CDS-genome-2	complement(194602..195039)		175	14.7089	10.0887	7.94045	170	10.2972	10.1222	6.29219	160	19.9182	14.3965	8.31884	134	19.0229	14.1007	8.32539	118	14.3475	8.44073	8.17524	198	26.5882	20.0335	11.3344
gltB	CGbielefeld-CDS-genome-2	195241..199773		279	2.26586	1.55413	12.6594	206	1.20566	1.18517	7.62466	269	3.23572	2.33872	13.9861	240	3.29209	2.44025	14.9111	155	1.82102	1.07132	10.7387	222	2.88048	2.17037	12.7083
gltD	CGbielefeld-CDS-genome-2	199773..201293		89	2.15415	1.47751	4.03829	73	1.27332	1.25168	2.70194	53	1.89999	1.37328	2.75562	63	2.57548	1.90907	3.91418	54	1.89075	1.11234	3.74121	56	2.16549	1.63164	3.20569
cg0231	CGbielefeld-CDS-genome-2	complement(201339..201581)		32	4.84796	3.32517	1.45197	26	2.83864	2.7904	0.962335	23	5.1609	3.7302	1.19583	35	8.95588	6.63852	2.17454	20	4.38322	2.57867	1.38563	31	7.50331	5.65356	1.77458
cg0232	CGbielefeld-CDS-genome-2	complement(201618..201776)		1	0.231536	0.158808	0.045374	7	1.168	1.14815	0.25909	3	1.02879	0.743593	0.155978	5	1.95533	1.44938	0.310649	4	1.33978	0.788197	0.277127	1	0.369914	0.278721	0.0572444
cg0233	CGbielefeld-CDS-genome-2	complement(201758..203245)		627	15.5124	10.6398	28.4495	763	13.604	13.3727	28.2408	482	17.6623	12.766	25.0605	469	19.5982	14.5271	29.1389	357	12.7772	7.51687	24.7336	503	19.8821	14.9807	28.7939
embC	CGbielefeld-CDS-genome-2	complement(203539..207012)		17190	182.163	124.944	779.98	17907	136.753	134.429	662.79	12014	188.565	136.291	624.641	10511	188.131	139.452	653.046	10810	165.716	97.4918	748.935	10818	183.153	138.002	619.27
cg0236	CGbielefeld-CDS-genome-2	complement(207005..209038)		3068	55.529	38.0868	139.208	3167	41.3086	40.6065	117.22	2418	64.8201	46.8507	125.718	1872	57.2271	42.4194	116.307	1667	43.647	25.6777	115.493	1684	48.6955	36.6909	96.3995
cg0237	CGbielefeld-CDS-genome-2	complement(209208..209969)		1527	73.7733	50.6004	69.2861	1781	62.0087	60.9548	65.92	1201	85.9394	62.1154	62.4433	1258	102.653	76.0913	78.1593	1366	95.4696	56.1653	94.6388	2139	165.102	124.401	122.446
cg0238	CGbielefeld-CDS-genome-2	complement(209990..211456)		3434	86.1758	59.1072	155.814	4868	88.0368	86.5405	180.179	2871	106.711	77.1283	149.271	3783	160.344	118.855	235.037	4878	177.085	104.18	337.956	7196	288.508	217.384	411.931
cg0239	CGbielefeld-CDS-genome-2	complement(211533..211760)		31	5.00544	3.43318	1.40659	85	9.89072	9.72261	3.1461	50	11.9575	8.64263	2.59964	27	7.36335	5.45806	1.6775	9	2.10221	1.23674	0.623535	20	5.15932	3.88742	1.14489
cg0240	CGbielefeld-CDS-genome-2	211778..212287		113	8.15687	5.59472	5.12726	173	8.99953	8.84657	6.40323	99	10.5845	7.65026	5.14728	66	8.04675	5.96463	4.10057	122	12.7397	7.49483	8.45237	125	14.4157	10.8619	7.15555
cg0241	CGbielefeld-CDS-genome-2	212284..212739		77	6.21643	4.26379	3.4938	88	5.1199	5.03288	3.25714	59	7.05491	5.09915	3.06757	66	8.99965	6.67096	4.10057	78	9.1096	5.35922	5.40397	72	9.28678	6.99736	4.1216
cg0242	CGbielefeld-CDS-genome-2	212726..213661		406	15.9685	10.9527	18.4219	525	14.8808	14.6279	19.4318	391	22.7775	16.4631	20.3292	335	22.2544	16.496	20.8135	551	31.3505	18.4437	38.1742	798	50.1446	37.7828	45.681
cg0243	CGbielefeld-CDS-genome-2	213665..214111		489	40.2732	27.623	22.1879	721	42.7929	42.0655	26.6863	352	42.9378	31.0346	18.3014	287	39.9228	29.5927	17.8312	281	33.4787	19.6957	19.4682	282	37.1056	27.9581	16.1429
cg0244	CGbielefeld-CDS-genome-2	214122..214526		440	39.9957	27.4326	19.9646	543	35.5704	34.9658	20.098	280	37.697	27.2467	14.558	188	28.8635	21.395	11.6804	151	19.856	11.6814	10.4615	160	23.236	17.5078	9.1591
cg0245	CGbielefeld-CDS-genome-2	214528..215163		613	35.4829	24.3374	27.8143	976	40.7133	40.0213	36.1246	382	32.7499	23.671	19.8612	301	29.4277	21.8132	18.7011	200	16.7472	9.85247	13.8563	226	20.9001	15.7477	12.9372
cg0246	CGbielefeld-CDS-genome-2	complement(215160..216101)		777	30.3658	20.8276	35.2556	1154	32.5011	31.9487	42.7129	610	35.3088	25.5205	31.7156	493	32.5419	24.1216	30.63	504	28.4937	16.763	34.918	623	38.8986	29.3092	35.6633
cg0247	CGbielefeld-CDS-genome-2	complement(216114..216713)		249	15.2779	10.479	11.2981	504	22.2855	21.9068	18.6545	216	19.6294	14.1877	11.2304	171	17.7211	13.1357	10.6242	119	10.5625	6.21395	8.24452	140	13.7238	10.3405	8.01421
cg0248	CGbielefeld-CDS-genome-2	complement(217139..217930)		1899	88.2704	60.5438	86.1653	1723	57.717	56.736	63.7732	1400	96.3845	69.6649	72.7899	1160	91.0709	67.506	72.0705	983	66.0994	38.8866	68.1039	1092	81.0951	61.1032	62.5109
cg0249	CGbielefeld-CDS-genome-2	complement(217941..218837)		2156	88.4854	60.6913	97.8264	2712	80.2123	78.849	100.379	1538	93.4906	67.5733	79.9649	1330	92.1947	68.339	82.6326	1270	75.4016	44.3592	87.9877	1389	91.0767	68.6241	79.5125
cg0250	CGbielefeld-CDS-genome-2	218950..220155		3089	94.2944	64.6756	140.16	3383	74.4215	73.1566	125.215	3470	156.887	113.395	180.415	4214	217.267	161.049	261.815	3132	138.307	81.3667	216.99	3677	179.326	135.118	210.488
cg0251	CGbielefeld-CDS-genome-2	complement(220152..221108)		894	34.3907	23.5882	40.5644	992	27.5007	27.0333	36.7168	769	43.8146	31.6683	39.9824	810	52.6283	39.0106	50.3251	621	34.558	20.3307	43.0239	749	46.0328	34.6846	42.876
cg0252	CGbielefeld-CDS-genome-2	complement(221129..221656)		321	22.3813	15.3512	14.5651	389	19.5461	19.2139	14.398	224	23.1323	16.7196	11.6464	218	25.6726	19.0297	13.5443	107	10.7924	6.34924	7.41314	147	16.375	12.3382	8.41492
tRNA_3534	CGbielefeld-CDS-genome-2	221751..221838		0	0	0	0	0	0	0	0	0	0	0	0	0	0	0	0	0	0	0	0	0	0	0	0
cg0253	CGbielefeld-CDS-genome-2	221930..222211		627	81.8528	56.1421	28.4495	765	71.9708	70.7475	28.3149	557	107.699	77.8425	28.96	435	95.9151	71.0967	27.0265	337	63.6429	37.4415	23.3479	323	67.3675	50.7598	18.4899
cg0254	CGbielefeld-CDS-genome-2	complement(222208..223695)		8092	200.202	137.317	367.167	8276	147.557	145.05	306.319	6645	243.498	175.996	345.492	4833	201.958	149.701	300.273	3490	124.908	73.4843	241.793	3158	124.826	94.0537	180.778
cg0255	CGbielefeld-CDS-genome-2	complement(223790..224161)		0	0	0	0	1	0.0713183	0.0701061	0.0370129	0	0	0	0	2	0.334298	0.247797	0.12426	5	0.715808	0.421113	0.346408	1	0.158108	0.119131	0.0572444
cg0256	CGbielefeld-CDS-genome-2	224355..225248		59	2.42957	1.66642	2.67707	126	3.73918	3.67563	4.66363	47	2.86658	2.07191	2.44366	40	2.78208	2.06221	2.48519	22	1.31055	0.771005	1.5242	43	2.82897	2.13156	2.46151
cg0257	CGbielefeld-CDS-genome-2	complement(225240..226313)		428	14.6708	10.0626	19.4201	532	13.1417	12.9183	19.6909	384	19.4954	14.0909	19.9652	344	19.9159	14.7626	21.3726	282	13.9834	8.22653	19.5374	379	20.7555	15.6387	21.6956
moaE	CGbielefeld-CDS-genome-2	complement(226310..226768)		227	18.2066	12.4877	10.2999	249	14.3923	14.1477	9.21621	210	24.9466	18.0309	10.9185	176	23.8422	17.673	10.9348	186	21.5809	12.6962	12.8864	252	32.2913	24.3307	14.4256
moaB	CGbielefeld-CDS-genome-2	complement(226758..227231)		348	27.0281	18.5383	15.7902	434	24.2915	23.8787	16.0636	300	34.5102	24.9433	15.5978	202	26.4984	19.6419	12.5502	308	34.6052	20.3584	21.3388	430	53.3565	40.2029	24.6151
moaC	CGbielefeld-CDS-genome-2	complement(227216..227686)		122	9.53573	6.54047	5.53563	192	10.8149	10.6311	7.10648	121	14.0078	10.1245	6.29112	117	15.4458	11.4492	7.26918	134	15.1514	8.91366	9.28375	199	24.8502	18.724	11.3916
moeA1	CGbielefeld-CDS-genome-2	complement(227701..228888)		250	7.74709	5.31366	11.3435	352	7.86086	7.72725	13.0285	210	9.63845	6.96649	10.9185	144	7.5369	5.5867	8.94669	126	5.64837	3.32297	8.72949	127	6.2876	4.73755	7.27004
modB	CGbielefeld-CDS-genome-2	complement(228889..229728)		69	3.02402	2.07415	3.13081	72	2.27403	2.23538	2.66493	86	5.58243	4.03488	4.47138	84	6.21794	4.60903	5.2189	87	5.51581	3.24498	6.02751	85	5.95164	4.48442	4.86577
modA	CGbielefeld-CDS-genome-2	complement(229709..230515)		149	6.79717	4.66211	6.76073	203	6.67369	6.56026	7.51362	253	17.0943	12.3554	13.1542	409	31.5135	23.3593	25.4111	382	25.2092	14.8307	26.4656	645	47.0093	35.4204	36.9226
cg0264	CGbielefeld-CDS-genome-2	230675..230932		188	26.8258	18.3996	8.53032	216	22.2115	21.834	7.99479	188	39.7322	28.7177	9.77464	214	51.5752	38.2299	13.2958	306	63.1642	37.1598	21.2002	338	77.0538	58.0582	19.3486
cg0265	CGbielefeld-CDS-genome-2	complement(230929..231843)		748	30.0951	20.6419	33.9398	801	23.225	22.8302	29.6473	1773	105.655	76.3657	92.1832	2116	143.794	106.587	131.467	542	31.5462	18.5588	37.5507	769	49.4314	37.2453	44.0209
cg0266	CGbielefeld-CDS-genome-2	complement(231846..232268)		319	27.7629	19.0423	14.4743	345	21.6383	21.2705	12.7694	800	103.123	74.5351	41.5942	1114	163.754	121.382	69.2126	185	23.2917	13.7026	12.8171	243	33.7881	25.4585	13.9104
pat	CGbielefeld-CDS-genome-2	complement(232258..233283)		946	33.9437	23.2817	42.9238	1023	26.4528	26.0032	37.8642	2940	156.244	112.93	152.859	3694	223.87	165.943	229.507	588	30.521	17.9557	40.7376	790	45.2874	34.1229	45.2231
tRNA_3535	CGbielefeld-CDS-genome-2	233410..233498		0	0	0	0	0	0	0	0	0	0	0	0	0	0	0	0	0	0	0	0	0	0	0	0
tRNA_3536	CGbielefeld-CDS-genome-2	233528..233603		0	0	0	0	0	0	0	0	0	0	0	0	0	0	0	0	0	0	0	0	0	0	0	0
cg0269	CGbielefeld-CDS-genome-2	233914..234822		283	11.4614	7.86127	12.8408	405	11.8205	11.6196	14.9902	342	20.5148	14.8277	17.7815	354	24.2151	17.9494	21.9939	219	12.8307	7.54835	15.1727	365	23.6171	17.7949	20.8942
cg0270	CGbielefeld-CDS-genome-2	complement(234908..235192)		28	3.61683	2.48075	1.27047	58	5.39917	5.3074	2.14675	47	8.99202	6.49926	2.44366	38	8.29059	6.14537	2.36093	18	3.36354	1.97879	1.24707	35	7.22305	5.44239	2.00355
cg0272	CGbielefeld-CDS-genome-2	complement(235449..236213)		100	4.81231	3.30072	4.5374	198	6.86669	6.74998	7.32855	77	5.48825	3.9668	4.00344	97	7.88419	5.84413	6.02659	64	4.45541	2.62114	4.43403	161	12.3783	9.32677	9.21635
cg0273	CGbielefeld-CDS-genome-2	236327..237346		61	2.20163	1.51008	2.76782	37	0.962377	0.94602	1.36948	42	2.24519	1.62278	2.1837	29	1.76785	1.31041	1.80176	31	1.61857	0.952212	2.14773	45	2.59483	1.95515	2.576
cg0274	CGbielefeld-CDS-genome-2	237346..238149		26	1.19051	0.816559	1.17972	35	1.15493	1.1353	1.29545	13	0.88164	0.637233	0.675906	18	1.39208	1.03187	1.11834	18	1.1923	0.701437	1.24707	16	1.17047	0.881923	0.91591
mgtE2	CGbielefeld-CDS-genome-2	238219..239529		546	15.3322	10.5162	24.7742	564	11.4135	11.2195	20.8753	499	20.754	15.0006	25.9444	436	20.679	15.3283	27.0886	351	14.2585	8.38835	24.3179	513	23.0151	17.3413	29.3664
cg0277	CGbielefeld-CDS-genome-2	239936..241519		19329	449.231	308.123	877.035	17189	287.898	283.005	636.215	15062	518.48	374.747	783.115	9949	390.545	289.49	618.129	10362	348.384	204.956	717.897	6984	259.326	195.396	399.795
tRNA_3537	CGbielefeld-CDS-genome-2	241638..241710		0	0	0	0	0	0	0	0	0	0	0	0	0	0	0	0	0	0	0	0	0	0	0	0
tyrA	CGbielefeld-CDS-genome-2	complement(241881..242921)		644	22.7746	15.6209	29.2209	753	19.1906	18.8644	27.8707	479	25.0893	18.1341	24.9045	385	22.9962	17.0459	23.92	246	12.585	7.40383	17.0433	379	21.4134	16.1345	21.6956
cg0280	CGbielefeld-CDS-genome-2	242941..243435		897	66.7118	45.757	40.7005	853	45.718	44.941	31.572	847	93.3002	67.4356	44.0379	754	94.7137	70.2062	46.8459	863	92.8485	54.6233	59.7901	904	107.414	80.9338	51.7489
cg0281	CGbielefeld-CDS-genome-2	243483..243914		365	31.1046	21.3343	16.5615	318	19.5293	19.1974	11.7701	325	41.0208	29.649	16.8976	409	58.8689	43.6364	25.4111	331	40.805	24.0058	22.9322	380	51.7365	38.9822	21.7529
cg0282	CGbielefeld-CDS-genome-2	244016..244219		120	21.6554	14.8532	5.44488	437	56.8323	55.8663	16.1746	94	25.1248	18.1597	4.88732	97	29.5657	21.9155	6.02659	115	30.0218	17.662	7.96739	180	51.8967	39.1029	10.304
tRNA_3538	CGbielefeld-CDS-genome-2	244295..244385		0	0	0	0	0	0	0	0	0	0	0	0	0	0	0	0	0	0	0	0	0	0	0	0
cg0283	CGbielefeld-CDS-genome-2	244569..244820		25	3.6522	2.50501	1.13435	37	3.89534	3.82913	1.36948	41	8.87131	6.41201	2.1317	24	5.92185	4.38955	1.49111	21	4.43801	2.6109	1.45492	47	10.9697	8.2654	2.69049
cg0284	CGbielefeld-CDS-genome-2	244903..247308		4057	62.0761	42.5774	184.082	4654	51.3186	50.4463	172.258	3424	77.5965	56.0853	178.023	2700	69.7774	51.7223	167.75	2492	55.1597	32.4507	172.65	2632	64.341	48.4794	150.667
tgt	CGbielefeld-CDS-genome-2	247311..248576		5486	159.528	109.419	248.922	5762	120.749	118.697	213.268	3821	164.569	118.947	198.664	3323	163.209	120.978	206.457	2634	110.803	65.186	182.488	2975	138.214	104.141	170.302
cg0286	CGbielefeld-CDS-genome-2	complement(248555..249307)		3714	181.578	124.542	168.519	4715	166.123	163.3	174.516	2405	174.15	125.873	125.043	1944	160.527	118.99	120.78	1618	114.433	67.3218	112.098	2033	158.796	119.649	116.378
cg0287	CGbielefeld-CDS-genome-2	249429..250511		33	1.12176	0.769406	1.49734	35	0.8574	0.842827	1.29545	14	0.704862	0.509461	0.727899	18	1.03345	0.766044	1.11834	19	0.934318	0.549664	1.31635	23	1.2491	0.941166	1.31662
cg0288	CGbielefeld-CDS-genome-2	250504..251943		72	1.84071	1.26253	3.26693	111	2.04505	2.01029	4.10843	64	2.42338	1.75157	3.32754	39	1.68403	1.24828	2.42306	38	1.40537	0.826786	2.6327	63	2.57321	1.93885	3.6064
gltX	CGbielefeld-CDS-genome-2	251953..252834		177	7.38788	5.06728	8.0312	236	7.09884	6.97818	8.73504	146	9.02586	6.52372	7.59094	159	11.2092	8.3088	9.87863	167	10.0836	5.93226	11.57	327	21.806	16.4303	18.7189
cg0291	CGbielefeld-CDS-genome-2	complement(252828..253820)		354	13.1241	9.00169	16.0624	415	11.0877	10.8993	15.3604	287	15.7593	11.3905	14.9219	292	18.2844	13.5532	18.1419	290	15.5531	9.14999	20.0917	275	16.2885	12.273	15.7422
tnp16a(ISCg16a)	CGbielefeld-CDS-genome-2	complement(254327..255487)		141	4.47097	3.0666	6.39774	200	4.57027	4.49259	7.40258	110	5.16612	3.73397	5.7192	110	5.89125	4.36687	6.83428	82	3.76141	2.21286	5.6811	125	6.3325	4.77139	7.15555
cg0293	CGbielefeld-CDS-genome-2	complement(255490..255795)		0	0	0	0	6	0.520204	0.511362	0.222077	0	0	0	0	0	0	0	0	0	0	0	0	0	0	0	0
tRNA_3539	CGbielefeld-CDS-genome-2	complement(256223..256310)		0	0	0	0	0	0	0	0	0	0	0	0	0	0	0	0	0	0	0	0	0	0	0	0
aspB	CGbielefeld-CDS-genome-2	256618..257898		4595	132.054	90.5746	208.494	5870	121.572	119.505	217.266	3916	166.685	120.477	203.604	3115	151.201	112.077	193.534	2763	114.869	67.5778	191.425	3316	152.252	114.718	189.822
cg0295	CGbielefeld-CDS-genome-2	257901..258533		1351	78.5718	53.8917	61.3003	1411	59.1381	58.1329	52.2252	1067	91.9105	66.4311	55.4763	936	91.943	68.1525	58.1535	883	74.2893	43.7048	61.1757	1038	96.4475	72.6709	59.4197
dnaZX	CGbielefeld-CDS-genome-2	258552..260879		4503	71.2089	48.8415	204.319	5348	60.947	59.9111	197.945	3503	82.0467	59.3018	182.131	3055	81.5971	60.4836	189.806	2442	55.864	32.8651	169.186	3055	77.1837	58.1561	174.882
cg0297	CGbielefeld-CDS-genome-2	260988..261299		787	92.8614	63.6928	35.7094	1068	90.8156	89.272	39.5298	656	114.645	82.8629	34.1072	488	97.255	72.09	30.3193	557	95.0758	55.9336	38.5899	551	103.871	78.2643	31.5417
recR	CGbielefeld-CDS-genome-2	261403..262059		406	22.7497	15.6038	18.4219	550	22.2096	21.8321	20.3571	270	22.408	16.1961	14.038	183	17.3194	12.8379	11.3697	160	12.9695	7.63004	11.0851	225	20.1426	15.1769	12.88
cobQ	CGbielefeld-CDS-genome-2	complement(262544..263296)		420	20.5338	14.0839	19.0571	669	23.5708	23.1702	24.7616	313	22.6649	16.3818	16.2737	300	24.7727	18.3627	18.6389	217	15.3474	9.02894	15.0341	282	22.0268	16.5967	16.1429
cg0300	CGbielefeld-CDS-genome-2	complement(263296..264567)		906	26.2214	17.985	41.1089	1136	23.6938	23.2911	42.0467	659	28.249	20.4178	34.2632	560	27.3746	20.2913	34.7927	432	18.087	10.6407	29.9297	611	28.2521	21.2873	34.9763
cg0302	CGbielefeld-CDS-genome-2	complement(264597..265679)		997	33.8908	23.2454	45.2379	1342	32.8752	32.3164	49.6713	929	46.7726	33.8063	48.3013	883	50.6966	37.5787	54.8606	803	39.4872	23.2305	55.6332	828	44.9675	33.882	47.3984
leuA	CGbielefeld-CDS-genome-2	complement(266152..268002)		2897	57.6179	39.5196	131.449	2722	39.0144	38.3513	100.749	2650	78.0627	56.4222	137.781	2177	73.1305	54.2078	135.257	1403	40.3665	23.7478	97.2022	2690	85.4758	64.404	153.987
cg0304	CGbielefeld-CDS-genome-2	complement(268256..268948)		736	39.0985	26.8173	33.3953	931	35.6418	35.0361	34.459	551	43.3533	31.335	28.648	464	41.6324	30.8599	28.8282	427	32.8144	19.3049	29.5833	470	39.8898	30.056	26.9049
cg0305	CGbielefeld-CDS-genome-2	269030..269128		0	0	0	0	0	0	0	0	0	0	0	0	0	0	0	0	0	0	0	0	0	0	0	0
lysC	CGbielefeld-CDS-genome-2	269371..270636		8937	259.88	178.249	405.508	7906	165.679	162.863	292.624	7779	335.038	242.159	404.452	7157	351.515	260.559	444.663	6278	264.093	155.367	434.95	6862	318.797	240.206	392.811
asd	CGbielefeld-CDS-genome-2	270660..271694		5610	199.544	136.865	254.548	7418	190.147	186.915	274.562	5034	265.202	191.683	261.732	3952	237.423	175.989	245.537	3701	190.436	112.034	256.412	3970	225.604	169.987	227.26
cg0308	CGbielefeld-CDS-genome-2	271980..273197		365	11.0322	7.56686	16.5615	485	10.5642	10.3847	17.9513	243	10.8784	7.86267	12.6342	191	9.75063	7.22762	11.8668	195	8.52622	5.01602	13.5099	214	10.3339	7.78634	12.2503
sigC	CGbielefeld-CDS-genome-2	complement(273539..274120)		661	41.8113	28.678	29.9922	977	44.5364	43.7795	36.1616	650	60.8968	44.0151	33.7953	521	55.6623	41.2595	32.3696	553	50.6024	29.7697	38.3128	781	78.927	59.4696	44.7079
katA	CGbielefeld-CDS-genome-2	274324..275874		4196	99.5953	68.3115	190.389	5118	87.5452	86.0572	189.432	3007	105.712	76.4069	156.342	2936	117.704	87.2477	182.413	2019	69.3256	40.7846	139.88	4218	159.953	120.521	241.457
cg0311	CGbielefeld-CDS-genome-2	complement(275954..276247)		68	8.51484	5.84025	3.08543	56	5.05341	4.96752	2.07272	60	11.1278	8.04294	3.11957	53	11.2092	8.3088	3.29288	62	11.2309	6.60718	4.29546	80	16.0044	12.0589	4.57955
lrp	CGbielefeld-CDS-genome-2	complement(276299..276754)		22	1.77612	1.21823	0.998229	56	3.25812	3.20274	2.07272	31	3.70682	2.67922	1.61178	20	2.72717	2.0215	1.2426	11	1.28469	0.755788	0.762099	44	5.67525	4.27617	2.51875
brnF	CGbielefeld-CDS-genome-2	276829..277584		517	25.1758	17.2679	23.4584	531	18.6344	18.3177	19.6538	403	29.0661	21.0085	20.9531	365	30.0205	22.2526	22.6774	339	23.8807	14.0491	23.4865	314	24.429	18.4066	17.9747
brnE	CGbielefeld-CDS-genome-2	277581..277907		128	14.4104	9.88399	5.80788	162	13.1435	12.9201	5.99609	89	14.8404	10.7264	4.62736	74	14.0712	10.4302	4.5976	52	8.46886	4.98227	3.60265	57	10.2524	7.72492	3.26293
cg0316	CGbielefeld-CDS-genome-2	complement(277984..278277)		37	4.63308	3.17778	1.67884	52	4.69245	4.6127	1.92467	44	8.16036	5.89816	2.28768	66	13.9586	10.3468	4.10057	74	13.4046	7.88599	5.12684	106	21.2059	15.9781	6.0679
cg0317	CGbielefeld-CDS-genome-2	complement(278385..278732)		41	4.3373	2.97492	1.86034	68	5.1841	5.09599	2.51688	30	4.70052	3.39745	1.55978	34	6.075	4.50308	2.11241	28	4.28497	2.52087	1.93989	37	6.25345	4.71183	2.11804
arsC1	CGbielefeld-CDS-genome-2	278814..279896		241	8.19226	5.61899	10.9351	276	6.76121	6.64629	10.2156	137	6.89757	4.98543	7.12301	129	7.40641	5.48998	8.01474	101	4.96664	2.9219	6.99745	128	6.9515	5.23779	7.32728
arsX	CGbielefeld-CDS-genome-2	279893..280282		159	15.0089	10.2944	7.21447	230	15.6461	15.3802	8.51297	120	16.7773	12.1263	6.23913	108	17.2189	12.7635	6.71002	92	12.563	7.39086	6.37392	106	15.986	12.045	6.0679
cg0321	CGbielefeld-CDS-genome-2	complement(280346..280666)		343	39.3373	26.9811	15.5633	473	39.0931	38.4286	17.5071	270	45.8631	33.1489	14.038	204	39.5159	29.291	12.6745	206	34.1768	20.1064	14.272	156	28.5836	21.5371	8.93012
cg0322	CGbielefeld-CDS-genome-2	complement(280667..280939)		253	34.1172	23.4006	11.4796	307	29.8345	29.3275	11.363	156	31.1578	22.5202	8.11087	115	26.1928	19.4153	7.14492	127	24.7748	14.5752	8.79877	101	21.7599	16.3955	5.78168
cg0323	CGbielefeld-CDS-genome-2	complement(280946..281401)		814	65.7165	45.0744	36.9345	822	47.8245	47.0117	30.4246	548	65.5269	47.3616	28.492	486	66.2702	49.1226	30.1951	465	54.3072	31.9492	32.216	402	51.8512	39.0686	23.0122
mnhD	CGbielefeld-CDS-genome-2	complement(281401..282933)		2260	54.2727	37.2251	102.545	2422	41.9156	41.2032	89.6452	1832	65.161	47.0971	95.2507	1436	58.245	43.174	89.2184	1578	54.8194	32.2505	109.327	1432	54.9412	41.3969	81.974
cg0325	CGbielefeld-CDS-genome-2	complement(282934..283317)		594	56.9469	39.0594	26.9522	720	49.7445	48.899	26.6493	435	61.7678	44.6446	22.6168	336	54.407	40.329	20.8756	333	46.183	27.1697	23.0708	287	43.959	33.1221	16.4291
nuoL	CGbielefeld-CDS-genome-2	complement(283314..286208)		6092	77.4687	53.1351	276.419	5776	52.9325	52.0328	213.786	5246	98.8061	71.4152	272.754	4102	88.1036	65.3065	254.856	3855	70.9162	41.7203	267.081	4257	86.4873	65.1661	243.689
cg0327	CGbielefeld-CDS-genome-2	286373..287860		452	11.1828	7.67018	20.5091	440	7.84501	7.71167	16.2857	333	12.2024	8.81967	17.3136	343	14.333	10.6243	21.3105	271	9.6992	5.70609	18.7753	426	16.8385	12.6874	24.3861
cg0328	CGbielefeld-CDS-genome-2	complement(287963..288829)		173	7.34585	5.03845	7.84971	148	4.52883	4.45186	5.47791	93	5.84882	4.22741	4.83533	89	6.38289	4.7313	5.52955	69	4.23837	2.49346	4.78044	69	4.68088	3.52693	3.94986
cgtR1	CGbielefeld-CDS-genome-2	complement(289128..289796)		72	3.96206	2.71754	3.26693	90	3.56911	3.50845	3.33116	78	6.3573	4.59494	4.05543	63	5.85546	4.34034	3.91418	53	4.21909	2.48211	3.67193	57	5.01125	3.77586	3.26293
cgtS1	CGbielefeld-CDS-genome-2	complement(289774..291243)		249	6.23587	4.27713	11.2981	302	5.45046	5.35782	11.1779	219	8.12327	5.87135	11.3864	172	7.27541	5.39288	10.6863	182	6.59361	3.87906	12.6093	194	7.76214	5.84859	11.1054
cg0332	CGbielefeld-CDS-genome-2	complement(291270..291617)		8	0.846303	0.580471	0.362992	21	1.60097	1.57376	0.777271	7	1.09679	0.792738	0.363949	5	0.893382	0.662217	0.310649	5	0.765174	0.450156	0.346408	6	1.01407	0.76408	0.343466
cg0333	CGbielefeld-CDS-genome-2	291800..292420		118	6.99529	4.798	5.35414	203	8.67258	8.52517	7.51362	95	8.34135	6.02897	4.93931	106	10.6136	7.86726	6.58576	94	8.06131	4.74251	6.51248	77	7.29284	5.49498	4.40782
tRNA_3540	CGbielefeld-CDS-genome-2	complement(292466..292542)		0	0	0	0	0	0	0	0	0	0	0	0	0	0	0	0	0	0	0	0	0	0	0	0
cg0334	CGbielefeld-CDS-genome-2	complement(292594..293511)		530	21.2544	14.5782	24.0482	670	19.3631	19.034	24.7986	396	23.5211	17.0006	20.5891	353	23.9099	17.7232	21.9318	248	14.3873	8.4641	17.1819	369	23.6418	17.8135	21.1232
cg0335	CGbielefeld-CDS-genome-2	293539..293994		248	20.0217	13.7327	11.2528	730	42.4719	41.75	27.0194	195	23.3171	16.8531	10.1386	162	22.0901	16.3742	10.065	111	12.9637	7.62659	7.69027	243	31.3429	23.6161	13.9104
ponA	CGbielefeld-CDS-genome-2	complement(294001..296388)		3981	61.3724	42.0947	180.634	4712	52.3498	51.46	174.405	3333	76.1036	55.0062	173.292	2567	66.8403	49.5451	159.487	2078	46.3426	27.2636	143.967	2388	58.8162	44.3166	136.7
whiB4	CGbielefeld-CDS-genome-2	297055..297405		6063	635.91	436.165	275.103	4242	320.632	315.183	157.009	6326	982.712	710.286	328.906	4075	721.884	535.094	253.179	3329	505.098	297.152	230.639	2613	437.854	329.913	149.58
cg0338	CGbielefeld-CDS-genome-2	297631..297786		1	0.235988	0.161862	0.045374	2	0.340133	0.334352	0.0740258	7	2.44668	1.76842	0.363949	1	0.398586	0.295451	0.0621298	1	0.341385	0.200839	0.0692817	0	0	0	0
cg0339	CGbielefeld-CDS-genome-2	297792..298253		1326	105.661	72.4722	60.166	1318	75.6863	74.3999	48.783	1277	150.714	108.933	66.3947	1245	167.561	124.204	77.3516	1246	143.63	84.4983	86.325	1713	218.078	164.317	98.0596
cg0340	CGbielefeld-CDS-genome-2	complement(298329..299684)		103	2.79636	1.918	4.67352	140	2.73913	2.69257	5.18181	91	3.6592	2.6448	4.73134	85	3.89768	2.88914	5.28103	61	2.39574	1.40943	4.22618	106	4.59773	3.46428	6.0679
fadD1	CGbielefeld-CDS-genome-2	complement(299723..301255)		26	0.624376	0.428254	1.17972	54	0.934534	0.918651	1.9987	28	0.99591	0.719825	1.4558	32	1.29794	0.962094	1.98815	36	1.25063	0.735754	2.49414	30	1.151	0.867253	1.71733
cg0343	CGbielefeld-CDS-genome-2	complement(301509..301976)		126	9.91151	6.79821	5.71713	227	12.8684	12.6497	8.40193	82	9.55371	6.90524	4.26341	103	13.6848	10.1438	6.39937	113	12.8588	7.56492	7.82883	191	24.0041	18.0865	10.9337
fabG1	CGbielefeld-CDS-genome-2	302167..303102		30	1.17994	0.809311	1.36122	48	1.36053	1.33741	1.77662	39	2.27192	1.6421	2.02772	21	1.39505	1.03408	1.30473	28	1.59313	0.937247	1.93989	46	2.89054	2.17795	2.63324
cg0345	CGbielefeld-CDS-genome-2	303133..304077		78	3.03863	2.08417	3.53917	63	1.76869	1.73863	2.33181	44	2.53878	1.83498	2.28768	39	2.56613	1.90214	2.42306	40	2.25423	1.32617	2.77127	41	2.55182	1.92273	2.34702
fadE	CGbielefeld-CDS-genome-2	304070..305266		57	1.75306	1.2024	2.58632	107	2.37156	2.33125	3.96038	51	2.32317	1.67914	2.65163	61	3.16871	2.3488	3.78992	43	1.91313	1.1255	2.97911	61	2.99732	2.25841	3.49191
cg0347	CGbielefeld-CDS-genome-2	305288..305761		30	2.33001	1.59813	1.36122	33	1.84705	1.81566	1.22143	21	2.41571	1.74603	1.09185	21	2.75478	2.04198	1.30473	15	1.68532	0.991482	1.03923	36	4.46706	3.36582	2.0608
cg0349	CGbielefeld-CDS-genome-2	305858..306703		12789	556.521	381.712	580.288	15617	489.746	481.422	578.03	10409	670.877	484.897	541.193	7466	548.737	406.75	463.861	7281	458.342	269.645	504.44	5509	383.001	288.582	315.359
cg0350	CGbielefeld-CDS-genome-2	complement(306779..307462)		1395	75.0816	51.4977	63.2968	1536	59.577	58.5644	56.8518	1551	123.64	89.3648	80.6408	1207	109.723	81.3319	74.9906	784	61.0421	35.9114	54.3168	1346	115.741	87.2079	77.0509
cg0352	CGbielefeld-CDS-genome-2	complement(307724..307918)		180	33.9823	23.3082	8.16732	216	29.3875	28.888	7.99479	116	32.436	23.4441	6.03116	107	34.119	25.2906	6.64789	139	37.962	22.3333	9.63015	204	61.5308	46.362	11.6779
nth	CGbielefeld-CDS-genome-2	307955..308737		471	22.1449	15.189	21.3712	713	24.1586	23.748	26.3902	509	35.4454	25.6193	26.4643	473	37.5618	27.8425	29.3874	534	36.3203	21.3674	36.9964	945	70.9851	53.4856	54.0959
cg0354	CGbielefeld-CDS-genome-2	308745..309305		853	55.9759	38.3934	38.704	714	33.766	33.1921	26.4272	666	64.7315	46.7867	34.6272	651	72.1547	53.4845	40.4465	734	69.6791	40.9926	50.8528	1030	107.987	81.3657	58.9617
cg0355	CGbielefeld-CDS-genome-2	309262..310041		633	29.8761	20.4918	28.7218	768	26.1222	25.6783	28.4259	462	32.2962	23.3431	24.0207	357	28.459	21.0952	22.1803	316	21.5755	12.693	21.893	319	24.0543	18.1244	18.261
cg0356	CGbielefeld-CDS-genome-2	310177..311328		1736	55.4769	38.0511	78.7693	1991	45.8524	45.0731	73.6927	1269	60.0639	43.413	65.9788	979	52.8417	39.1688	60.8251	620	28.6621	16.8621	42.9546	628	32.063	24.1587	35.9495
cg0358	CGbielefeld-CDS-genome-2	complement(311896..312891)		1507	55.7018	38.2053	68.3787	1698	45.2295	44.4608	62.8479	1232	67.4459	48.7486	64.0551	984	61.4303	45.535	61.1357	939	50.2083	29.5378	65.0555	1279	75.5281	56.9086	73.2156
cg0359	CGbielefeld-CDS-genome-2	complement(312906..313511)		1805	109.653	75.2098	81.9001	2563	112.207	110.3	94.8641	1610	144.863	104.704	83.7083	1247	127.95	94.8426	77.4758	1466	128.834	75.7937	101.567	2282	221.483	166.882	130.632
cg0360	CGbielefeld-CDS-genome-2	complement(313622..314464)		1030	44.9806	30.8517	46.7352	1273	40.0631	39.3822	47.1174	923	59.7006	43.1504	47.9893	977	72.0632	53.4166	60.7008	975	61.5951	36.2367	67.5496	1396	97.3991	73.3879	79.9132
cg0362	CGbielefeld-CDS-genome-2	314908..316005		39	1.30761	0.896876	1.76959	47	1.13564	1.11633	1.73961	18	0.89387	0.646072	0.93587	28	1.58563	1.17534	1.73963	19	0.921554	0.542155	1.31635	44	2.35694	1.77589	2.51875
cg0363	CGbielefeld-CDS-genome-2	316002..317135		29	0.941456	0.645736	1.31585	43	1.006	0.988904	1.59155	18	0.865493	0.625562	0.93587	20	1.09664	0.81288	1.2426	22	1.03319	0.607829	1.5242	35	1.81532	1.3678	2.00355
cg0364	CGbielefeld-CDS-genome-2	317120..317896		26	1.23188	0.844933	1.17972	20	0.682893	0.671286	0.740258	10	0.701751	0.507212	0.519928	12	0.9603	0.711819	0.745557	14	0.959569	0.56452	0.969944	18	1.36254	1.02664	1.0304
cg0365	CGbielefeld-CDS-genome-2	317893..318468		72	4.60177	3.15631	3.26693	76	3.50054	3.44104	2.81298	56	5.30115	3.83157	2.91159	82	8.85193	6.56147	5.09464	88	8.13635	4.78666	6.09679	130	13.2745	10.002	7.44177
cg0366	CGbielefeld-CDS-genome-2	318492..318692		8	1.46524	1.005	0.362992	0	0	0	0	0	0	0	0	4	1.2374	0.91722	0.248519	2	0.529911	0.31175	0.138563	2	0.585236	0.440962	0.114489
cg0368	CGbielefeld-CDS-genome-2	318696..319016		28	3.21121	2.20254	1.27047	37	3.05802	3.00605	1.36948	25	4.24658	3.06935	1.29982	43	8.32933	6.17409	2.67158	20	3.31814	1.95208	1.38563	41	7.51236	5.66038	2.34702
cg0369	CGbielefeld-CDS-genome-2	318991..319338		114	12.0598	8.27172	5.17264	102	7.77615	7.64398	3.77532	82	12.8481	9.28636	4.26341	96	17.1529	12.7146	5.96446	107	16.3747	9.63333	7.41314	117	19.7744	14.8996	6.69759
cg0370	CGbielefeld-CDS-genome-2	complement(319333..321729)		1345	20.6571	14.1685	61.0281	1511	16.724	16.4398	55.9265	1187	27.0014	19.5161	61.7154	1040	26.9781	19.9975	64.615	971	21.5735	12.6918	67.2725	1362	33.42	25.1812	77.9669
cspA2	CGbielefeld-CDS-genome-2	322007..322210		4799	866.036	594.006	217.75	5259	683.938	672.313	194.651	5208	1392.02	1006.12	270.778	4499	1371.3	1016.47	279.522	3752	979.495	576.242	259.945	3689	1063.59	801.392	211.175
cg0372	CGbielefeld-CDS-genome-2	complement(322294..322452)		3	0.694607	0.476425	0.136122	28	4.67202	4.59261	1.03636	0	0	0	0	0	0	0	0	2	0.669888	0.394099	0.138563	0	0	0	0
topA	CGbielefeld-CDS-genome-2	322911..325901		6419	79.0071	54.1902	291.256	7208	63.9355	62.8488	266.789	6407	116.8	84.4208	333.118	5175	107.582	79.745	321.522	5203	92.6418	54.5016	360.473	5933	116.669	87.9072	339.631
cg0374	CGbielefeld-CDS-genome-2	325905..326618		442	22.7897	15.6313	20.0553	614	22.8147	22.4269	22.7259	457	34.8997	25.2249	23.7607	428	37.2728	27.6284	26.5915	398	29.6862	17.4645	27.5741	491	40.4465	30.4754	28.107
cyaB	CGbielefeld-CDS-genome-2	complement(326693..328336)		2483	55.602	38.1369	112.664	2390	38.5691	37.9136	88.4608	16585	550.07	397.58	862.3	20547	777.129	576.045	1276.58	2234	72.3687	42.5749	154.775	2065	73.8781	55.6654	118.21
dnaX	CGbielefeld-CDS-genome-2	328284..329543		486	14.1998	9.73948	22.0518	519	10.928	10.7423	19.2097	491	21.2479	15.3575	25.5284	475	23.4407	17.3753	29.5116	400	16.9067	9.9463	27.7127	669	31.2286	23.53	38.2965
tRNA_3541	CGbielefeld-CDS-genome-2	329630..329705		0	0	0	0	0	0	0	0	0	0	0	0	0	0	0	0	0	0	0	0	0	0	0	0
cg0378	CGbielefeld-CDS-genome-2	329934..330380		242	19.9307	13.6703	10.9805	616	36.5609	35.9395	22.7999	243	29.6417	21.4245	12.6342	153	21.2829	15.7759	9.50586	169	20.1349	11.8454	11.7086	162	21.316	16.0611	9.27359
cg0380	CGbielefeld-CDS-genome-2	330574..330813		116	17.7935	12.2044	5.26339	140	15.4761	15.213	5.18181	132	29.9893	21.6757	6.86304	89	23.0582	17.0918	5.52955	87	19.3053	11.3574	6.02751	88	21.566	16.2494	5.03751
cg0382	CGbielefeld-CDS-genome-2	330974..331537		88	5.74406	3.93979	3.99291	180	8.46715	8.32324	6.66232	122	11.7946	8.52495	6.34312	95	10.4735	7.76344	5.90233	75	7.08193	4.16633	5.19613	69	7.1956	5.42172	3.94986
rluC1	CGbielefeld-CDS-genome-2	331553..332437		67	2.78706	1.91162	3.04006	122	3.6573	3.59514	4.51557	31	1.90995	1.38048	1.61178	34	2.38881	1.7707	2.11241	33	1.98582	1.16827	2.2863	30	1.99377	1.50226	1.71733
bglS'	CGbielefeld-CDS-genome-2	332920..334566		60	1.34114	0.919873	2.72244	73	1.17591	1.15592	2.70194	66	2.18502	1.57929	3.43152	74	2.79373	2.07085	4.5976	49	1.58443	0.932126	3.3948	104	3.71396	2.79838	5.95342
'bglS	CGbielefeld-CDS-genome-2	334550..334957		36	3.24831	2.22799	1.63346	63	4.09661	4.02698	2.33181	37	4.94477	3.57398	1.92373	22	3.35281	2.48526	1.36686	30	3.91589	2.30374	2.07845	35	5.04551	3.80167	2.00355
adhE	CGbielefeld-CDS-genome-2	335010..336116		367	12.2049	8.37121	16.6523	515	12.3425	12.1327	19.0616	265	13.0528	9.43429	13.7781	273	15.3342	11.3664	16.9614	275	13.2298	7.78318	19.0525	381	20.243	15.2526	21.8101
cg0388	CGbielefeld-CDS-genome-2	336117..336752		225	13.0239	8.93296	10.2092	268	11.1795	10.9895	9.91946	144	12.3455	8.92311	7.48696	137	13.394	9.92826	8.51178	154	12.8953	7.5864	10.6694	185	17.1085	12.8908	10.5902
cg0389	CGbielefeld-CDS-genome-2	336773..337453		185	10.0009	6.85953	8.39419	315	12.2718	12.0632	11.6591	192	15.373	11.1113	9.98261	144	13.1481	9.74597	8.94669	156	12.1996	7.17711	10.8079	146	12.6097	9.50107	8.35768
cg0390	CGbielefeld-CDS-genome-2	337540..338772		394	11.7638	8.06869	17.8774	490	10.5433	10.3641	18.1363	398	17.6005	12.7213	20.6931	334	16.8434	12.4851	20.7513	214	9.24315	5.43779	14.8263	358	17.0772	12.8673	20.4935
rmlB2	CGbielefeld-CDS-genome-2	338794..339729		803	31.5831	21.6626	36.4353	1101	31.2072	30.6768	40.7512	689	40.1372	29.0104	35.823	600	39.8586	29.5451	37.2779	438	24.9211	14.6612	30.3454	551	34.6237	26.0881	31.5417
cg0393	CGbielefeld-CDS-genome-2	complement(340193..340570)		716	69.7327	47.829	32.4878	646	45.3403	44.5697	23.9103	561	80.9236	58.4901	29.1679	451	74.1876	54.9913	28.0205	415	58.469	34.3976	28.7519	511	79.5109	59.9095	29.2519
cg0394	CGbielefeld-CDS-genome-2	complement(340567..341277)		697	36.0893	24.7533	31.6257	1433	53.4712	52.5624	53.0395	464	35.5838	25.7193	24.1246	335	29.2969	21.7162	20.8135	266	19.9242	11.7215	18.4289	361	29.8631	22.5011	20.6652
cg0395	CGbielefeld-CDS-genome-2	341348..342379		816	29.1089	19.9655	37.0252	956	24.5766	24.1589	35.3843	677	35.7695	25.8535	35.1991	591	35.6086	26.3947	36.7187	448	23.1189	13.601	31.0382	531	30.263	22.8025	30.3968
cg0396	CGbielefeld-CDS-genome-2	342418..343455		1080	38.3038	26.2722	49.0039	1411	36.064	35.451	52.2252	965	50.6914	36.6388	50.173	692	41.4529	30.7269	42.9938	686	35.1962	20.7061	47.5272	798	45.2171	34.07	45.681
cg0397	CGbielefeld-CDS-genome-2	343637..345721		476	8.40458	5.76462	21.598	479	6.09499	5.9914	17.7292	439	11.4805	8.29792	22.8248	442	13.1814	9.7707	27.4614	404	10.3192	6.07082	27.9898	385	10.8606	8.18317	22.0391
cg0398	CGbielefeld-CDS-genome-2	complement(345812..345910)		0	0	0	0	0	0	0	0	0	0	0	0	0	0	0	0	0	0	0	0	0	0	0	0
cg0399	CGbielefeld-CDS-genome-2	complement(346108..346461)		123	12.7914	8.77348	5.58101	326	24.4319	24.0167	12.0662	90	13.8626	10.0196	4.67935	72	12.6467	9.3743	4.47334	71	10.6813	6.28387	4.919	108	17.9439	13.5203	6.18239
adhC	CGbielefeld-CDS-genome-2	complement(346959..348020)		1303	45.1684	30.9806	59.1224	2025	50.5876	49.7278	74.9511	1263	64.846	46.8694	65.6668	935	54.7436	40.5786	58.0913	1057	53.0054	31.1833	73.2307	1113	61.6408	46.4448	63.713
rmlA1	CGbielefeld-CDS-genome-2	complement(348096..348953)		741	31.7941	21.8073	33.6222	1100	34.0133	33.4352	40.7142	498	31.648	22.8746	25.8924	327	23.6977	17.5659	20.3164	378	23.4625	13.8031	26.1885	355	24.3354	18.3361	20.3218
rmlCD	CGbielefeld-CDS-genome-2	complement(348950..350311)		1487	40.1929	27.5679	67.4712	1871	36.4452	35.8258	69.2511	1103	44.1573	31.9161	57.348	863	39.3986	29.2041	53.618	843	32.9625	19.392	58.4045	828	35.7561	26.9414	47.3984
rmlB1	CGbielefeld-CDS-genome-2	complement(350311..351330)		1391	50.2044	34.4348	63.1153	1575	40.9661	40.2698	58.2953	1068	57.092	41.265	55.5283	757	46.1469	34.2062	47.0322	523	27.3068	16.0647	36.2343	647	37.308	28.1106	37.0371
cg0404	CGbielefeld-CDS-genome-2	complement(351368..351949)		89	5.62966	3.86133	4.03829	112	5.10551	5.01873	4.14544	66	6.18337	4.46922	3.43152	73	7.79914	5.78109	4.53547	55	5.03279	2.96082	3.81049	132	13.3398	10.0512	7.55626
cg0405	CGbielefeld-CDS-genome-2	352694..353641		485	18.8343	12.9182	22.0064	595	16.6515	16.3684	22.0227	381	21.914	15.839	19.8092	281	18.4308	13.6618	17.4585	211	11.8534	6.97343	14.6184	374	23.2039	17.4836	21.4094
cg0407	CGbielefeld-CDS-genome-2	complement(353747..354388)		1117	64.0521	43.9327	50.6828	1008	41.6552	40.9472	37.309	679	57.6685	41.6817	35.3031	476	46.1019	34.1729	29.5738	432	35.8359	21.0824	29.9297	392	35.9127	27.0594	22.4398
cg0408	CGbielefeld-CDS-genome-2	complement(354597..355847)		1261	37.1085	25.4523	57.2166	1181	25.0459	24.6202	43.7122	1003	43.7167	31.5976	52.1487	841	41.8009	30.9848	52.2511	778	33.1201	19.4847	53.9012	1182	55.5722	41.8723	67.6629
cg0409	CGbielefeld-CDS-genome-2	complement(355847..357229)		1436	38.225	26.2182	65.1571	1625	31.1727	30.6429	60.146	1063	41.9098	30.2916	55.2683	949	42.6669	31.6267	58.9612	902	34.7339	20.4341	62.4921	1116	47.4613	35.7609	63.8847
cg0410	CGbielefeld-CDS-genome-2	complement(357235..359241)		1394	25.57	17.5382	63.2514	2184	28.8701	28.3795	80.8362	1181	32.0853	23.1907	61.4034	1070	33.15	24.5723	66.4789	1104	29.2948	17.2343	76.487	1177	34.4926	25.9894	67.3766
cg0411	CGbielefeld-CDS-genome-2	complement(359760..360335)		480	30.6785	21.0421	21.7795	679	31.2745	30.743	25.1318	350	33.1322	23.9473	18.1975	237	25.5842	18.9642	14.7248	184	17.0124	10.0085	12.7478	189	19.2991	14.5414	10.8192
cg0412	CGbielefeld-CDS-genome-2	complement(360812..361906)		265	8.90937	6.11085	12.0241	467	11.3148	11.1225	17.285	193	9.61053	6.94631	10.0346	176	9.99413	7.40812	10.9348	157	7.63581	4.49218	10.8772	180	9.66842	7.28493	10.304
cmt1	CGbielefeld-CDS-genome-2	complement(362055..363152)		9660	323.884	222.149	438.313	11205	270.741	266.139	414.73	7540	374.432	270.632	392.025	6147	348.103	258.03	381.912	5524	267.93	157.624	382.712	6036	323.329	243.62	345.527
wzz	CGbielefeld-CDS-genome-2	363825..365261		5505	141.031	96.7321	249.784	5752	106.195	104.39	212.898	4168	158.152	114.309	216.706	4124	178.447	132.273	256.223	3378	125.191	73.6504	234.034	4445	181.933	137.082	254.451
ptpA2	CGbielefeld-CDS-genome-2	365251..365856		1730	105.097	72.0848	78.4971	1837	80.423	79.0561	67.9927	1375	123.718	89.4213	71.49	1135	116.458	86.3242	70.5173	937	82.3448	48.4439	64.9169	1262	122.485	92.2898	72.2424
cg0416	CGbielefeld-CDS-genome-2	365856..366842		2591	96.6419	66.2858	117.564	3162	84.994	83.5494	117.035	2136	118.002	85.2894	111.057	1797	113.208	83.9152	111.647	1811	97.7171	57.4875	125.469	2340	139.443	105.067	133.952
capD	CGbielefeld-CDS-genome-2	366833..368647		6152	124.783	85.5874	279.141	6062	88.6101	87.104	224.372	4951	148.738	107.505	257.416	4280	146.627	108.687	265.915	4905	143.924	84.6709	339.827	6990	226.515	170.674	400.138
cg0418	CGbielefeld-CDS-genome-2	368648..369805		2726	86.6627	59.4412	123.69	3305	75.7193	74.4323	122.328	2160	101.707	73.5116	112.304	1761	94.5578	70.0907	109.411	2467	113.457	66.7471	170.918	3443	174.874	131.764	197.092
cg0419	CGbielefeld-CDS-genome-2	369795..370409		1660	99.3684	68.1558	75.3209	1731	74.6734	73.4042	64.0693	1358	120.401	87.0233	70.6062	988	99.8915	74.0443	61.3842	1502	130.066	76.5186	104.061	1874	179.222	135.04	107.276
cg0420	CGbielefeld-CDS-genome-2	370614..371777		757	23.9419	16.4215	34.3481	1417	32.2969	31.7479	52.4473	680	31.8537	23.0233	35.3551	550	29.3803	21.7781	34.1714	593	27.1313	15.9615	41.084	698	35.2695	26.5748	39.9566
wzx	CGbielefeld-CDS-genome-2	371930..373423		1064	26.2184	17.983	48.278	1651	29.3184	28.8201	61.1083	941	34.3434	24.8228	48.9252	776	32.2967	23.9398	48.2127	773	27.5549	16.2107	53.5547	865	34.0536	25.6586	49.5164
murA	CGbielefeld-CDS-genome-2	373501..374817		2470	69.0441	47.3567	112.074	5178	104.309	102.536	191.653	1928	79.8225	57.6942	100.242	1580	74.5964	55.2944	98.1651	1726	69.795	41.0608	119.58	2000	89.3185	67.2994	114.489
murB	CGbielefeld-CDS-genome-2	374834..375841		2475	90.392	61.999	112.301	2875	75.6695	74.3834	106.412	2119	114.624	82.8479	110.173	1784	110.048	81.5725	110.84	1948	102.92	60.5481	134.961	2276	132.803	100.064	130.288
cg0424	CGbielefeld-CDS-genome-2	375843..376880		2014	71.4294	48.9928	91.3833	2991	76.4474	75.1481	110.706	1767	92.8204	67.0888	91.8712	1309	78.4132	58.1235	81.3279	1437	73.7274	43.3742	99.5578	1638	92.8141	69.9332	93.7663
tnp17a(ISCg17a)	CGbielefeld-CDS-genome-2	377684..377836		0	0	0	0	2	0.346803	0.340908	0.0740258	0	0	0	0	0	0	0	0	0	0	0	0	0	0	0	0
tnp17b(ISCg17a)	CGbielefeld-CDS-genome-2	378094..378231		0	0	0	0	0	0	0	0	0	0	0	0	0	0	0	0	0	0	0	0	0	0	0	0
tnp17c(ISCG17a)	CGbielefeld-CDS-genome-2	378186..378515		591	65.9309	45.2214	26.816	506	40.6799	39.9885	18.7285	273	45.1079	32.6032	14.194	257	48.4246	35.8946	15.9674	163	26.3053	15.4755	11.2929	250	44.5578	33.5732	14.3111
cg0431	CGbielefeld-CDS-genome-2	complement(378666..379838)		815	25.5785	17.544	36.9798	1114	25.196	24.7677	41.2324	859	39.93	28.8606	44.6618	693	36.7352	27.2298	43.0559	710	32.2352	18.9641	49.19	770	38.6091	29.0911	44.0782
cg0432	CGbielefeld-CDS-genome-2	complement(379848..380843)		2324	85.8998	58.9178	105.449	2588	68.9364	67.7647	95.7894	2024	110.804	80.087	105.233	1674	104.506	77.465	104.005	2252	120.414	70.8404	156.022	1748	103.224	77.7766	100.063
udgA1	CGbielefeld-CDS-genome-2	381949..383112		1468	46.4289	31.8451	66.6091	2265	51.6249	50.7474	83.8342	1346	63.0516	45.5725	69.9822	1108	59.188	43.8729	68.8398	1073	49.0926	28.8814	74.3392	1198	60.5342	45.6111	68.5788
cg0436	CGbielefeld-CDS-genome-2	complement(383494..383769)		276	36.8142	25.2505	12.5232	340	32.6824	32.1269	12.5844	274	54.131	39.1248	14.246	236	53.1679	39.4105	14.6626	202	38.9773	22.9305	13.9949	212	45.1777	34.0403	12.1358
cg0437	CGbielefeld-CDS-genome-2	complement(383980..385191)		1443	43.8307	30.0631	65.4747	2633	57.6358	56.6561	97.455	1253	56.3706	40.7436	65.1469	879	45.0955	33.4269	54.6121	1001	43.9846	25.8764	69.351	1178	57.1663	43.0734	67.4339
cg0438	CGbielefeld-CDS-genome-2	complement(385372..386196)		1011	45.1141	30.9433	45.8731	1997	64.2196	63.1281	73.9148	828	54.7243	39.5537	43.05	604	45.5229	33.7437	37.5264	598	38.6026	22.7101	41.4304	715	50.9741	38.4077	40.9297
cg0439	CGbielefeld-CDS-genome-2	386557..387204		1078	61.2433	42.0062	48.9132	1903	77.9126	76.5883	70.4355	1051	88.4366	63.9203	54.6444	761	73.0224	54.1276	47.2808	982	80.706	47.4798	68.0346	1391	126.255	95.1303	79.6269
cg0440	CGbielefeld-CDS-genome-2	complement(387461..387607)		0	0	0	0	0	0	0	0	0	0	0	0	0	0	0	0	0	0	0	0	0	0	0	0
lpd	CGbielefeld-CDS-genome-2	387693..389102		4876	127.309	87.3202	221.244	5342	100.514	98.8061	197.723	3900	150.817	109.008	202.772	3836	169.163	125.392	238.33	3758	141.941	83.5045	260.361	5544	231.26	174.249	317.363
galU2	CGbielefeld-CDS-genome-2	389249..390172		1934	77.0548	52.8512	87.7534	1685	48.3806	47.5583	62.3667	1511	89.1655	64.4471	78.5611	1986	133.645	99.0642	123.39	1960	112.967	66.4594	135.792	2472	157.353	118.561	141.508
cg0443	CGbielefeld-CDS-genome-2	390213..390734		327	23.0618	15.8178	14.8373	472	23.9892	23.5814	17.4701	292	30.5012	22.0457	15.1819	258	30.7324	22.7803	16.0295	239	24.3835	14.345	16.5583	273	30.7602	23.1771	15.6277
cg0444	CGbielefeld-CDS-genome-2	complement(390784..392208)		1335	34.4891	23.6557	60.5743	885	16.4768	16.1967	32.7564	1196	45.7636	33.0771	62.1833	766	33.4242	24.7756	47.5914	600	22.4236	13.1919	41.569	671	27.6952	20.8677	38.411
sdhCD	CGbielefeld-CDS-genome-2	392705..393478		25153	1196.37	820.576	1141.29	27358	937.75	921.812	1012.6	23217	1635.57	1182.16	1207.12	21205	1703.51	1262.72	1317.46	16168	1112.46	654.466	1120.15	19410	1474.97	1111.35	1111.11
sdhA	CGbielefeld-CDS-genome-2	393495..395516		80642	1468.23	1007.05	3659.05	70868	929.85	914.046	2623.03	70338	1896.76	1370.94	3657.07	72095	2217.03	1643.36	4479.25	52828	1391.4	818.569	3660.01	68708	1998.59	1505.89	3933.15
sdhB	CGbielefeld-CDS-genome-2	395516..396265		21809	1070.51	734.251	989.562	24721	874.477	859.614	914.996	19249	1399.43	1011.48	1000.81	18344	1520.83	1127.31	1139.71	14388	1021.67	601.051	996.825	18349	1438.96	1084.22	1050.38
cg0448	CGbielefeld-CDS-genome-2	396315..396653		10922	1186.09	813.528	495.575	11144	872.138	857.315	412.472	10655	1713.79	1238.7	553.983	10207	1872.17	1387.74	634.159	8842	1389.06	817.19	612.589	10575	1834.75	1382.44	605.359
cg0449	CGbielefeld-CDS-genome-2	complement(396408..397040)		1097	63.7996	43.7596	49.7753	2023	84.7883	83.3472	74.8771	1293	111.378	80.5018	67.2266	824	80.9413	59.9975	51.1949	929	78.1594	45.9816	64.3627	773	71.8246	54.1181	44.2499
cg4001	CGbielefeld-CDS-genome-2	396672..396935		0	0	0	0	0	0	0	0	0	0	0	0	0	0	0	0	0	0	0	0	0	0	0	0
cg0450	CGbielefeld-CDS-genome-2	complement(397229..398206)		171	6.43684	4.41497	7.75896	260	7.05307	6.93319	9.62335	145	8.08413	5.84306	7.53895	124	7.88369	5.84376	7.70409	123	6.69785	3.94038	8.52165	138	8.29922	6.25327	7.89973
cg0451	CGbielefeld-CDS-genome-2	398278..399582		703	19.8317	13.6024	31.8979	712	14.4748	14.2288	26.3532	6552	273.758	197.867	340.657	7842	373.648	276.966	487.222	258	10.5288	6.19414	17.8747	418	18.8392	14.1949	23.9282
cg0452	CGbielefeld-CDS-genome-2	399598..400020		335	29.1554	19.9974	15.2003	382	23.9589	23.5517	14.1389	1569	202.249	146.182	81.5766	1613	237.105	175.753	100.215	273	34.371	20.2206	18.9139	335	46.5802	35.0971	19.1769
cg0453	CGbielefeld-CDS-genome-2	400039..400344		1093	131.496	90.1922	49.5938	1021	88.5214	87.0168	37.7902	1519	270.67	195.635	78.977	1313	266.803	197.767	81.5764	620	107.905	63.4808	42.9546	706	135.7	102.247	40.4145
cg0454	CGbielefeld-CDS-genome-2	400499..401152		402	22.6289	15.521	18.2404	395	16.0237	15.7514	14.6201	90	7.50359	5.42345	4.67935	90	8.5568	6.3427	5.59168	131	10.6675	6.27575	9.0759	178	16.0081	12.0617	10.1895
cg0455	CGbielefeld-CDS-genome-2	401149..402798		859	19.1657	13.1456	38.9763	952	15.3072	15.0471	35.2363	285	9.41814	6.80725	14.8179	196	7.38616	5.47497	12.1774	183	5.90659	3.47487	12.6785	163	5.81033	4.37795	9.33083
cg0456	CGbielefeld-CDS-genome-2	402798..404432		1047	23.5746	16.1696	47.5066	968	15.7073	15.4403	35.8285	430	14.3402	10.3648	22.3569	327	12.4359	9.21806	20.3164	350	11.4004	6.70691	24.2486	341	12.2669	9.2428	19.5203
purU	CGbielefeld-CDS-genome-2	complement(404504..405418)		2697	108.511	74.4269	122.374	4718	136.798	134.473	174.627	2266	135.034	97.6	117.816	1895	128.776	95.4548	117.736	1768	102.904	60.5387	122.49	1795	115.383	86.9381	102.754
deoC	CGbielefeld-CDS-genome-2	405479..406147		359	19.7553	13.55	16.2893	489	19.3922	19.0626	18.0993	330	26.8963	19.4401	17.1576	234	21.7489	16.1213	14.5384	234	18.6277	10.9588	16.2119	243	21.3637	16.0971	13.9104
cg0462	CGbielefeld-CDS-genome-2	406549..407418		54	2.28502	1.56727	2.4502	140	4.26926	4.1967	5.18181	34	2.1309	1.54018	1.76775	21	1.50088	1.11252	1.30473	25	1.53035	0.900311	1.73204	20	1.3521	1.01877	1.14489
cg0463	CGbielefeld-CDS-genome-2	complement(407405..407707)		202	24.5428	16.8337	9.16555	262	22.9405	22.5506	9.69738	152	27.353	19.7702	7.9029	89	18.2639	13.5381	5.52955	83	14.5883	8.58238	5.75038	86	16.6937	12.5783	4.92302
ctpA	CGbielefeld-CDS-genome-2	complement(407707..409974)		295	4.78844	3.28435	13.3853	374	4.37494	4.30058	13.8428	291	6.99607	5.05663	15.1299	254	6.96366	5.16179	15.781	365	8.57076	5.04222	25.2878	566	14.6781	11.0596	32.4003
cg0465	CGbielefeld-CDS-genome-2	complement(410023..410475)		21	1.70662	1.17055	0.952855	26	1.52272	1.49684	0.962335	10	1.20367	0.869987	0.519928	15	2.05892	1.52617	0.931947	8	0.940505	0.553304	0.554253	13	1.68788	1.27178	0.744177
cg0466	CGbielefeld-CDS-genome-2	410706..412547		584	11.6718	8.00559	26.4984	720	10.3702	10.1939	26.6493	355	10.5086	7.59538	18.4574	299	10.0932	7.48154	18.5768	189	5.46439	3.21473	13.0942	329	10.5052	7.9154	18.8334
cg0467	CGbielefeld-CDS-genome-2	412556..413635		352	11.9987	8.22979	15.9717	509	12.5037	12.2912	18.8396	285	14.3888	10.4	14.8179	322	18.5387	13.7417	20.0058	301	14.8427	8.73202	20.8538	656	35.7254	26.9183	37.5523
cg0468	CGbielefeld-CDS-genome-2	413636..414712		422	14.4249	9.89388	19.1478	529	13.0312	12.8097	19.5798	389	19.6942	14.2346	20.2252	395	22.8049	16.9041	24.5413	406	20.0761	11.8109	28.1284	755	41.2314	31.0669	43.2195
cg0469	CGbielefeld-CDS-genome-2	414713..415528		213	9.60958	6.59112	9.66467	240	7.80306	7.67043	8.8831	138	9.22132	6.665	7.175	176	13.4112	9.94104	10.9348	154	10.0508	5.91293	10.6694	241	17.371	13.0886	13.7959
cg0470	CGbielefeld-CDS-genome-2	415642..416601		38	1.45723	0.999499	1.72421	88	2.43195	2.39062	3.25714	36	2.04473	1.47789	1.87174	36	2.33173	1.72839	2.23667	36	1.9971	1.17491	2.49414	42	2.57321	1.93885	2.40426
cg0471	CGbielefeld-CDS-genome-2	416602..417441		51	2.23515	1.53307	2.31408	76	2.40037	2.35957	2.81298	30	1.94736	1.40751	1.55978	29	2.14667	1.59121	1.80176	13	0.824202	0.484882	0.900662	36	2.5207	1.89928	2.0608
cg0472	CGbielefeld-CDS-genome-2	complement(417541..418299)		667	32.3519	22.1898	30.2645	946	33.0669	32.5049	35.0142	451	32.3996	23.4178	23.4487	317	25.9695	19.2498	19.6951	229	16.068	9.45291	15.8655	224	17.3582	13.079	12.8227
cg0474	CGbielefeld-CDS-genome-2	complement(418437..419252)		538	24.2721	16.648	24.4112	660	21.4584	21.0937	24.4285	420	28.0649	20.2848	21.837	416	31.6993	23.497	25.846	332	21.6679	12.7474	23.0015	528	38.0576	28.6755	30.225
cg0475	CGbielefeld-CDS-genome-2	complement(419253..419756)		2045	149.375	102.455	92.7899	2832	149.076	146.542	104.821	1787	193.33	139.735	92.9111	1510	186.292	138.088	93.816	1429	150.998	88.8329	99.0035	2382	277.977	209.449	136.356
murB2	CGbielefeld-CDS-genome-2	419781..420887		679	22.5807	15.4879	30.809	734	17.5911	17.2921	27.1675	509	25.0712	18.121	26.4643	430	24.1528	17.9032	26.7158	359	17.2709	10.1606	24.8721	480	25.503	19.2159	27.4773
cg0477	CGbielefeld-CDS-genome-2	420880..421518		257	14.8063	10.1555	11.6611	352	14.6146	14.3662	13.0285	158	13.4822	9.74467	8.21486	153	14.888	11.0357	9.50586	118	9.83446	5.78566	8.17524	136	12.518	9.43202	7.78524
cg0478	CGbielefeld-CDS-genome-2	421558..421716		0	0	0	0	0	0	0	0	0	0	0	0	0	0	0	0	0	0	0	0	1	0.369914	0.278721	0.0572444
cg0479	CGbielefeld-CDS-genome-2	421857..422033		28	5.82371	3.99443	1.27047	20	2.99778	2.94683	0.740258	12	3.69668	2.67189	0.623913	26	9.1337	6.77033	1.61537	16	4.81411	2.83217	1.10851	12	3.98754	3.00452	0.686933
fadD5	CGbielefeld-CDS-genome-2	complement(422086..423792)		2947	63.5568	43.593	133.717	3597	55.905	54.9548	133.135	2444	78.0678	56.4259	127.07	2159	78.644	58.2946	134.138	2156	67.2643	39.5719	149.371	2430	83.7279	63.0869	139.104
cg0481	CGbielefeld-CDS-genome-2	423871..425133		622	18.1302	12.4353	28.2226	826	17.3508	17.0559	30.5727	493	21.2837	15.3835	25.6324	565	27.8158	20.6184	35.1033	621	26.1853	15.4049	43.0239	847	39.4437	29.7199	48.486
gpmA	CGbielefeld-CDS-genome-2	425176..425922		2705	133.31	91.4359	122.737	4342	154.21	151.589	160.71	2592	189.199	136.749	134.765	2340	194.779	144.379	145.384	2770	197.482	116.18	191.91	3804	299.514	225.677	217.758
cgtS4	CGbielefeld-CDS-genome-2	425933..427174		1915	56.7626	38.9329	86.8913	2055	43.8969	43.1508	76.0615	1620	71.121	51.4049	84.2283	1656	82.9059	61.4537	102.887	1746	74.8673	44.0448	120.966	2054	97.2694	73.2901	117.58
cgtR4	CGbielefeld-CDS-genome-2	427171..427869		914	48.1376	33.0171	41.4719	1244	47.2158	46.4133	46.044	881	68.7231	49.6718	45.8056	650	57.8206	42.8594	40.3844	605	46.0943	27.1175	41.9154	947	79.6838	60.0398	54.2104
cg0485	CGbielefeld-CDS-genome-2	428560..429441		72	3.00524	2.06127	3.26693	117	3.51934	3.45952	4.33051	58	3.58561	2.59161	3.01558	47	3.31342	2.45606	2.9201	32	1.93219	1.13672	2.21701	34	2.26729	1.70835	1.94631
cg0486	CGbielefeld-CDS-genome-2	complement(429434..432022)		1284	18.2578	12.5228	58.2602	1513	15.5042	15.2407	56.0005	1050	22.1137	15.9834	54.5924	1062	25.5058	18.9061	65.9818	1043	21.4547	12.6219	72.2608	999	22.695	17.1002	57.1871
cg0487	CGbielefeld-CDS-genome-2	complement(432122..433027)		415	16.863	11.5662	18.8302	591	17.3063	17.0121	21.8746	340	20.4623	14.7898	17.6775	258	17.7067	13.1251	16.0295	301	17.6933	10.409	20.8538	415	26.9412	20.2996	23.7564
ppx1	CGbielefeld-CDS-genome-2	433061..433990		6515	257.897	176.889	295.612	5749	164.003	161.216	212.787	5277	309.391	223.622	274.366	4699	314.173	232.88	291.948	4282	245.207	144.257	296.664	5966	377.309	284.294	341.52
cg0489	CGbielefeld-CDS-genome-2	434018..434824		4863	221.843	152.16	220.654	4490	147.61	145.101	166.188	3862	260.941	188.603	200.796	3698	284.931	211.204	229.756	3439	226.949	133.515	238.26	4357	317.549	239.266	249.414
proC	CGbielefeld-CDS-genome-2	434885..435697		1409	63.8022	43.7613	63.932	1734	56.5851	55.6234	64.1804	1233	82.6945	59.77	64.1071	1111	84.9709	62.9844	69.0262	1130	74.0214	43.5472	78.2883	1678	121.394	91.4678	96.0561
cg0491	CGbielefeld-CDS-genome-2	435887..435955		0	0	0	0	0	0	0	0	0	0	0	0	0	0	0	0	0	0	0	0	0	0	0	0
cg0492	CGbielefeld-CDS-genome-2	435948..436139		2585	495.649	339.961	117.292	2145	296.394	291.357	79.3927	1752	497.55	359.62	91.0913	1721	557.348	413.132	106.925	1461	405.246	238.408	101.221	1778	544.663	410.39	101.781
cg0493	CGbielefeld-CDS-genome-2	436309..436446		1	0.266769	0.182975	0.045374	0	0	0	0	1	0.395116	0.285583	0.0519928	2	0.901151	0.667975	0.12426	0	0	0	0	1	0.426205	0.321135	0.0572444
cg0494	CGbielefeld-CDS-genome-2	436462..436563		0	0	0	0	0	0	0	0	0	0	0	0	0	0	0	0	0	0	0	0	0	0	0	0
cg0495	CGbielefeld-CDS-genome-2	complement(436976..438043)		271	9.34143	6.4072	12.2964	570	14.1595	13.9188	21.0974	260	13.2741	9.59429	13.5181	242	14.0893	10.4437	15.0354	248	12.3666	7.27533	17.1819	369	20.3213	15.3116	21.1232
cg0496	CGbielefeld-CDS-genome-2	438190..438426		58	9.00938	6.17945	2.63169	131	14.6645	14.4152	4.84869	59	13.574	9.81103	3.06757	52	13.6427	10.1126	3.23075	50	11.2355	6.60988	3.46408	66	16.3792	12.3413	3.77813
hemA	CGbielefeld-CDS-genome-2	438515..439906		3030	80.1343	54.9634	137.483	3557	67.7935	66.6413	131.655	2639	103.372	74.7156	137.209	1805	80.6278	59.7651	112.144	2255	86.2734	50.7551	156.23	1939	81.9287	61.7313	110.997
hemC	CGbielefeld-CDS-genome-2	439908..440816		2392	96.8752	66.4458	108.535	2467	72.0027	70.7789	91.3108	2054	123.209	89.0528	106.793	1484	101.512	75.2453	92.2006	1559	91.338	53.7346	108.01	1849	119.638	90.1446	105.845
cg0499	CGbielefeld-CDS-genome-2	441219..441593		163	16.0019	10.9756	7.39597	479	33.8882	33.3122	17.7292	143	20.7926	15.0285	7.43496	63	10.4461	7.74317	3.91418	70	9.94114	5.84842	4.84972	68	10.6653	8.03608	3.89262
cg0500	CGbielefeld-CDS-genome-2	complement(441597..442481)		102	4.24299	2.91023	4.62815	134	4.01703	3.94876	4.95973	106	6.53081	4.72034	5.51123	80	5.62074	4.16635	4.97038	72	4.3327	2.54895	4.98828	55	3.65525	2.75414	3.14844
cg0501	CGbielefeld-CDS-genome-2	442757..444160		803	21.0554	14.4417	36.4353	703	13.2841	13.0583	26.0201	881	34.2147	24.7298	45.8056	751	33.2598	24.6537	46.6595	663	25.1487	14.7951	45.9338	533	22.3284	16.8239	30.5113
cg0502	CGbielefeld-CDS-genome-2	444184..446040		680	13.4807	9.24628	30.8543	665	9.50065	9.33918	24.6136	808	23.7249	17.1479	42.0101	787	26.3517	19.5332	48.8961	631	18.0962	10.6461	43.7167	628	19.8905	14.987	35.9495
aroD	CGbielefeld-CDS-genome-2	446086..446523		121	10.1701	6.9756	5.49026	181	10.9635	10.7771	6.69933	117	14.5652	10.5274	6.08315	108	15.3319	11.3647	6.71002	69	8.38966	4.93568	4.78044	104	13.9655	10.5227	5.95342
aroE	CGbielefeld-CDS-genome-2	446537..447388		588	25.407	17.4264	26.6799	615	19.1505	18.825	22.7629	564	36.0947	26.0886	29.3239	506	36.9281	27.3729	31.4377	447	27.9407	16.4377	30.9689	539	37.2089	28.036	30.8547
cg0505	CGbielefeld-CDS-genome-2	complement(447394..447669)		104	13.872	9.51468	4.7189	143	13.7458	13.5122	5.29284	104	20.5461	14.8503	5.40725	106	23.8805	17.7013	6.58576	115	22.19	13.0545	7.96739	120	25.5723	19.2681	6.86933
cg0506	CGbielefeld-CDS-genome-2	complement(448126..449178)		230	8.04108	5.5153	10.436	258	6.50032	6.38984	9.54933	187	9.68317	6.99881	9.72265	141	8.32602	6.17164	8.7603	130	6.57483	3.868	9.00662	172	9.60721	7.2388	9.84603
cg0507	CGbielefeld-CDS-genome-2	complement(449179..450825)		258	5.76688	3.95545	11.7065	365	5.87954	5.7796	13.5097	192	6.35641	4.59429	9.98261	146	5.51196	4.08572	9.07095	123	3.97723	2.33983	8.52165	99	3.5354	2.66384	5.66719
cg0508	CGbielefeld-CDS-genome-2	complement(450833..451912)		414	14.1121	9.67936	18.7848	412	10.1209	9.94884	15.2493	320	16.1559	11.6772	16.6377	226	13.0116	9.64482	14.0413	151	7.44599	4.38052	10.4615	235	12.798	9.64297	13.4524
hemD	CGbielefeld-CDS-genome-2	452636..454432		21038	430.994	295.615	954.579	21145	312.179	306.873	782.638	16502	500.717	361.909	857.984	12067	417.54	309.5	749.72	7014	207.868	122.29	485.942	8557	280.073	211.028	489.84
cg0511	CGbielefeld-CDS-genome-2	454458..454877		205	17.9688	12.3246	9.30168	381	24.0669	23.6578	14.1019	191	24.7964	17.9224	9.93062	140	20.7265	15.3634	8.69817	97	12.2996	7.23593	6.72032	113	15.8244	11.9233	6.46862
hemB	CGbielefeld-CDS-genome-2	454966..455985		975	35.19	24.1365	44.2397	1037	26.9726	26.5141	38.3824	2666	142.516	103.008	138.613	3323	202.571	150.155	206.457	581	30.3351	17.8463	40.2527	728	41.9787	31.6299	41.6739
cg0513	CGbielefeld-CDS-genome-2	456015..456599		398	25.0462	17.179	18.0589	470	21.315	20.9527	17.3961	851	79.3191	57.3304	44.2458	754	80.1424	59.4053	46.8459	184	16.7506	9.85449	12.7478	167	16.7903	12.6511	9.55981
cg0514	CGbielefeld-CDS-genome-2	456640..457152		458	32.8672	22.5433	20.7813	453	23.4274	23.0292	16.7668	1210	128.609	92.9563	62.9112	1267	153.57	113.833	78.7184	328	34.0507	20.0322	22.7244	424	48.6123	36.6282	24.2716
cg0515	CGbielefeld-CDS-genome-2	457266..459902		2396	33.4497	22.9428	108.716	2969	29.8706	29.3629	109.891	3495	72.2672	52.2334	181.715	3369	79.4397	58.8844	209.315	1934	39.0585	22.9783	133.991	2321	51.7681	39.006	132.864
hemE	CGbielefeld-CDS-genome-2	460019..461095		2736	93.5224	64.1461	124.143	3744	92.2282	90.6607	138.576	2228	112.799	81.5287	115.84	1485	85.7348	63.5507	92.2627	1699	84.0131	49.4253	117.71	1095	59.7992	45.0573	62.6826
hemY	CGbielefeld-CDS-genome-2	461111..462457		3176	86.8017	59.5364	144.108	3554	69.9993	68.8095	131.544	2468	99.9037	72.2085	128.318	1768	81.6134	60.4957	109.845	1936	76.5433	45.0308	134.129	1404	61.3051	46.1919	80.3711
hemL	CGbielefeld-CDS-genome-2	462556..463869		11865	332.42	228.004	538.363	15558	314.125	308.786	575.847	8933	370.686	267.925	464.451	4873	230.594	170.927	302.758	7622	308.918	181.738	528.065	2901	129.852	97.8406	166.066
cg0519	CGbielefeld-CDS-genome-2	463866..464474		6977	421.761	289.282	316.575	9859	429.496	422.196	364.91	4472	400.395	289.398	232.512	2807	286.597	212.439	174.398	5253	459.367	270.248	363.937	1793	173.165	130.476	102.639
cg0520	CGbielefeld-CDS-genome-2	464481..465104		6745	397.935	272.94	306.048	8776	373.126	366.784	324.825	4497	392.955	284.02	233.811	2526	251.707	186.577	156.94	4106	350.432	206.161	284.471	1520	143.27	107.951	87.0115
ccsA	CGbielefeld-CDS-genome-2	465105..465911		6952	317.14	217.524	315.44	10087	331.614	325.977	373.349	4939	333.71	241.2	256.792	2567	197.788	146.609	159.487	4624	305.15	179.521	320.359	1255	91.4676	68.9187	71.8417
cg0523	CGbielefeld-CDS-genome-2	465948..467573		16619	376.27	258.08	754.071	20746	338.499	332.746	767.87	10669	357.773	258.591	554.711	5734	219.272	162.535	356.252	9211	301.686	177.484	638.154	3041	110	82.8825	174.08
ccsB	CGbielefeld-CDS-genome-2	467647..468660		11334	411.491	282.238	514.269	16032	419.463	412.333	593.391	6329	340.331	245.985	329.062	3052	187.151	138.725	189.62	7238	380.146	223.642	501.461	2106	122.157	92.0422	120.557
cg0525	CGbielefeld-CDS-genome-2	469369..470172		15	0.686832	0.471091	0.68061	15	0.49497	0.486557	0.555193	18	1.22073	0.882323	0.93587	21	1.62409	1.20385	1.30473	13	0.861106	0.506593	0.900662	17	1.24363	0.937043	0.973155
cg0526	CGbielefeld-CDS-genome-2	470183..470656		53	4.11635	2.82337	2.40482	67	3.75008	3.68634	2.47986	58	6.67197	4.82237	3.01558	89	11.675	8.65409	5.52955	50	5.61773	3.30494	3.46408	59	7.32101	5.51621	3.37742
cg0527	CGbielefeld-CDS-genome-2	complement(470653..471012)		123	12.5782	8.62725	5.58101	253	18.645	18.3281	9.36426	144	21.8104	15.7642	7.48696	115	19.8629	14.7233	7.14492	101	14.9413	8.79004	6.99745	125	20.4223	15.3877	7.15555
cg0528	CGbielefeld-CDS-genome-2	complement(471117..471419)		116	14.0939	9.66686	5.26339	382	33.4476	32.8791	14.1389	100	17.9954	13.0067	5.19928	87	17.8535	13.2338	5.40529	102	17.9278	10.547	7.06673	130	25.2347	19.0137	7.44177
cg0530	CGbielefeld-CDS-genome-2	471598..471849		272	39.7359	27.2545	12.3417	210	22.1087	21.7329	7.77271	257	55.6079	40.1924	13.3621	251	61.9327	45.9074	15.5946	248	52.4108	30.8335	17.1819	507	118.333	89.1608	29.0229
menA	CGbielefeld-CDS-genome-2	complement(471911..472807)		1688	69.278	47.5171	76.5914	2027	59.9522	58.9332	75.0251	1434	87.1688	63.0039	74.5576	1251	86.7184	64.2798	77.7244	1136	67.4459	39.6787	78.704	1259	82.5526	62.2014	72.0707
cg0532	CGbielefeld-CDS-genome-2	472947..473813		633	26.8782	18.4355	28.7218	659	20.1655	19.8228	24.3915	453	28.4894	20.5916	23.5527	510	36.5761	27.1119	31.6862	476	29.2386	17.2012	32.9781	586	39.7535	29.9533	33.5452
menE	CGbielefeld-CDS-genome-2	complement(473810..475036)		362	10.8612	7.44962	16.4254	555	12.0003	11.7963	20.5422	329	14.6203	10.5673	17.1056	250	12.669	9.39085	15.5324	205	8.89772	5.23457	14.2027	273	13.0863	9.86018	15.6277
cg0534	CGbielefeld-CDS-genome-2	complement(474993..475406)		33	2.93446	2.01272	1.49734	26	1.66616	1.63784	0.962335	26	3.42434	2.47505	1.35181	24	3.6046	2.6719	1.49111	12	1.54366	0.90814	0.83138	31	4.40412	3.3184	1.77458
cg0535	CGbielefeld-CDS-genome-2	complement(475485..477047)		83	1.95494	1.34088	3.76604	121	2.05386	2.01895	4.47856	63	2.19779	1.58852	3.27554	71	2.82453	2.09367	4.41121	53	1.80587	1.0624	3.67193	75	2.82228	2.12652	4.29333
cg0536	CGbielefeld-CDS-genome-2	complement(477044..477994)		53	2.05168	1.40723	2.40482	64	1.78543	1.75509	2.36883	55	3.15345	2.27926	2.8596	62	4.05376	3.00484	3.85205	55	3.08001	1.81198	3.81049	87	5.38067	4.0542	4.98026
cg0537	CGbielefeld-CDS-genome-2	complement(478088..478972)		96	3.9934	2.73904	4.35591	118	3.53739	3.47726	4.36752	102	6.28436	4.54222	5.30326	185	12.998	9.63469	11.494	194	11.6742	6.868	13.4406	510	33.8941	25.5384	29.1946
cg0538	CGbielefeld-CDS-genome-2	complement(478985..479302)		45	5.20955	3.57318	2.04183	60	5.00573	4.92066	2.22077	62	10.6309	7.68379	3.22355	62	12.123	8.98616	3.85205	93	15.5749	9.16279	6.4432	163	30.148	22.7158	9.33083
cg0540	CGbielefeld-CDS-genome-2	complement(479448..480191)		232	11.4797	7.87381	10.5268	231	8.23726	8.09726	8.54998	168	12.3123	8.89912	8.73478	139	11.6169	8.61096	8.63604	135	9.66341	5.68503	9.35303	120	9.48649	7.14784	6.86933
cg0542	CGbielefeld-CDS-genome-2	complement(480204..480623)		61	5.34682	3.66733	2.76782	63	3.97956	3.91192	2.33181	43	5.58243	4.03488	2.23569	46	6.81013	5.04798	2.85797	27	3.42361	2.01413	1.87061	27	3.78104	2.84893	1.5456
cg0543	CGbielefeld-CDS-genome-2	complement(480620..481000)		93	8.98614	6.16351	4.21978	79	5.50105	5.40755	2.92402	74	10.5904	7.65452	3.84746	73	11.9136	8.83095	4.53547	45	6.29009	3.70049	3.11768	71	10.9605	8.25848	4.06435
cg0544	CGbielefeld-CDS-genome-2	complement(481127..481390)		946	131.917	90.481	42.9238	1204	120.995	118.938	44.5635	673	139	100.467	34.9911	356	83.848	62.1521	22.1182	208	41.9594	24.6849	14.4106	185	41.2159	31.0552	10.5902
pitA	CGbielefeld-CDS-genome-2	complement(481390..482667)		9926	285.929	196.116	450.383	10950	227.314	223.451	405.291	6151	262.433	189.682	319.807	3629	176.564	130.878	225.469	2576	107.346	63.152	178.47	2398	110.361	83.1544	137.272
menB	CGbielefeld-CDS-genome-2	complement(484102..485061)		386	14.8024	10.1528	17.5144	462	12.7678	12.5507	17.1	289	16.4146	11.8642	15.0259	236	15.2858	11.3305	14.6626	272	15.0892	8.87707	18.8446	351	21.5047	16.2033	20.0928
cg0549	CGbielefeld-CDS-genome-2	complement(485073..485354)		20	2.61093	1.79082	0.907481	31	2.91646	2.86689	1.1474	8	1.54684	1.11803	0.415942	8	1.76396	1.30753	0.497038	8	1.51081	0.888818	0.554253	23	4.79707	3.61448	1.31662
cg0550	CGbielefeld-CDS-genome-2	485353..485988		341	19.7384	13.5384	15.4725	451	18.8132	18.4935	16.6928	331	28.3776	20.5108	17.2096	238	23.2684	17.2476	14.7869	275	23.0274	13.5471	19.0525	315	29.1307	21.9493	18.032
menC	CGbielefeld-CDS-genome-2	486000..487016		457	16.5429	11.3466	20.7359	706	18.4174	18.1043	26.1311	598	32.0615	23.1735	31.0917	540	33.0156	24.4727	33.5501	285	14.9243	8.78003	19.7453	385	22.2657	16.7767	22.0391
menD	CGbielefeld-CDS-genome-2	487027..488658		3486	78.6362	53.9358	158.174	3388	55.0766	54.1405	125.4	2850	95.2202	68.8233	148.179	2359	89.8782	66.6219	146.564	1950	63.6332	37.4357	135.099	2150	77.4846	58.3828	123.075
cg0553	CGbielefeld-CDS-genome-2	488674..489102		410	35.1837	24.1322	18.6034	593	36.6726	36.0492	21.9486	309	39.274	28.3865	16.0658	248	35.9452	26.6443	15.4082	194	24.0832	14.1683	13.4406	185	25.3636	19.1109	10.5902
cg0554	CGbielefeld-CDS-genome-2	489208..490449		1118	33.1387	22.7295	50.7282	1735	37.0614	36.4315	64.2174	962	42.2336	30.5256	50.017	729	36.4966	27.053	45.2926	628	26.9282	15.842	43.5089	602	28.5084	21.4804	34.4611
cg0555	CGbielefeld-CDS-genome-2	490579..491940		811	21.9209	15.0354	36.7983	1102	21.4659	21.101	40.7882	594	23.7801	17.1878	30.8837	473	21.5939	16.0064	29.3874	406	15.8752	9.33944	28.1284	437	18.8713	14.2191	25.0158
ubiE	CGbielefeld-CDS-genome-2	491965..492657		1487	78.9938	54.1811	67.4712	1396	53.4436	52.5353	51.67	1235	97.1713	70.2336	64.2111	1088	97.6208	72.3611	67.5972	942	72.3914	42.5882	65.2633	1263	107.193	80.7675	72.2997
cg0557	CGbielefeld-CDS-genome-2	complement(492641..493915)		1779	51.3666	35.2319	80.7204	1739	36.1854	35.5704	64.3654	1512	64.6615	46.7361	78.613	1543	75.2493	55.7783	95.8663	1733	72.3865	42.5854	120.065	1988	91.7072	69.0992	113.802
ispB	CGbielefeld-CDS-genome-2	494060..495112		2800	97.8915	67.1428	127.047	3600	90.7022	89.1606	133.246	2526	130.8	94.5401	131.334	2348	138.649	102.773	145.881	2004	101.353	59.6268	138.84	2399	133.998	100.964	137.329
tRNA_3542	CGbielefeld-CDS-genome-2	495198..495283		0	0	0	0	0	0	0	0	0	0	0	0	0	0	0	0	0	0	0	0	0	0	0	0
tRNA_3543	CGbielefeld-CDS-genome-2	495903..495975		0	0	0	0	0	0	0	0	0	0	0	0	0	0	0	0	0	0	0	0	0	0	0	0
tRNA_3544	CGbielefeld-CDS-genome-2	496228..496300		0	0	0	0	0	0	0	0	0	0	0	0	0	0	0	0	0	0	0	0	0	0	0	0
tRNA_3545	CGbielefeld-CDS-genome-2	496339..496413		0	0	0	0	0	0	0	0	0	0	0	0	0	0	0	0	0	0	0	0	0	0	0	0
tRNA_3546	CGbielefeld-CDS-genome-2	496507..496582		0	0	0	0	0	0	0	0	0	0	0	0	0	0	0	0	0	0	0	0	0	0	0	0
secE	CGbielefeld-CDS-genome-2	496809..497144		5560	609.187	417.836	252.28	4533	357.923	351.84	167.779	4401	714.194	516.206	228.82	3973	735.235	544.99	246.842	4049	641.768	377.555	280.522	3826	669.735	504.629	219.017
nusG	CGbielefeld-CDS-genome-2	497373..498329		4881	187.764	128.785	221.471	3712	102.906	101.157	137.392	4030	229.613	165.96	209.531	3853	250.342	185.565	239.386	3233	179.913	105.844	223.988	6047	371.642	280.024	346.157
rplK	CGbielefeld-CDS-genome-2	498597..499034		43187	3629.9	2489.71	1959.57	57722	3496.32	3436.89	2136.46	29591	3683.75	2662.54	1538.52	21188	3007.89	2229.59	1316.41	19447	2364.55	1391.07	1347.32	25020	3359.78	2531.51	1432.25
rplA	CGbielefeld-CDS-genome-2	499161..499871		103977	5383.72	3692.65	4717.86	78281	2920.99	2871.35	2897.41	71628	5493.1	3970.31	3724.14	68239	5967.74	4423.57	4239.67	58282	4365.5	2568.25	4037.88	111445	9219.1	6946.37	6379.6
cg0565	CGbielefeld-CDS-genome-2	complement(499921..501435)		385	9.35542	6.41679	17.469	439	7.68769	7.55702	16.2487	266	9.57355	6.91958	13.8301	209	8.57789	6.35833	12.9851	158	5.5541	3.26751	10.9465	278	10.7927	8.13203	15.9139
gabT	CGbielefeld-CDS-genome-2	501576..502922		2748	75.1042	51.5133	124.688	1773	34.9209	34.3273	65.6239	4061	164.388	118.816	211.143	5500	253.888	188.193	341.714	3797	150.121	88.3171	263.063	5275	230.331	173.549	301.964
gabD2	CGbielefeld-CDS-genome-2	502924..504285		1559	42.139	28.9027	70.7381	1428	27.816	27.3432	52.8544	2321	92.9185	67.1597	120.675	3377	154.17	114.278	209.812	2555	99.9041	58.7741	177.015	3217	138.922	104.674	184.155
cg0568	CGbielefeld-CDS-genome-2	504324..505571		1332	39.2921	26.9501	60.4382	1250	26.5729	26.1213	46.2661	2075	90.6583	65.5261	107.885	2881	143.541	106.399	178.996	2515	107.323	63.1387	174.243	2818	132.808	100.068	161.315
cg0569	CGbielefeld-CDS-genome-2	505697..507649		596	11.2346	7.70573	27.0429	532	7.22692	7.10409	19.6909	562	15.6906	11.3408	29.2199	673	21.4269	15.8826	41.8133	1603	43.712	25.716	111.059	3607	108.628	81.8485	206.481
cg0570	CGbielefeld-CDS-genome-2	507668..509083		865	22.4889	15.4249	39.2485	1480	27.7295	27.2582	54.7791	776	29.8815	21.5978	40.3464	678	29.7723	22.0687	42.124	613	23.0551	13.5634	42.4697	712	29.5743	22.2835	40.758
cg0571	CGbielefeld-CDS-genome-2	509093..509698		259	15.7341	10.7919	11.7519	439	19.2192	18.8926	16.2487	287	25.8234	18.6647	14.9219	282	28.935	21.448	17.5206	270	23.728	13.9593	18.7061	386	37.4638	28.2281	22.0963
rplJ	CGbielefeld-CDS-genome-2	509997..510512		208774	14895	10216.4	9472.92	234022	12032.4	11827.8	8661.83	142688	15077.9	10898	7418.74	128958	15539.8	11518.8	8012.13	118023	12181.1	7166.2	8176.83	184893	21075	15879.5	10584.1
rplL	CGbielefeld-CDS-genome-2	510590..510976		120234	11437.5	7844.88	5455.5	126293	8657.89	8510.74	4674.47	92691	13059.6	9439.25	4819.26	79045	12700.2	9413.97	4911.05	74020	10186.1	5992.53	5128.23	93850	14263.3	10747.1	5372.39
cg0575	CGbielefeld-CDS-genome-2	511535..512509		2693	101.683	69.7432	122.192	3096	84.2442	82.8124	114.592	2357	131.813	95.2721	122.547	1880	119.895	88.8715	116.804	1482	80.9493	47.6229	102.675	1667	100.561	75.7701	95.4264
rpoB	CGbielefeld-CDS-genome-2	512912..516409		98724	1039.01	712.645	4479.51	116426	883.027	868.018	4309.26	78381	1221.79	883.084	4075.24	64606	1148.42	851.261	4013.96	50867	774.436	455.605	3524.15	75430	1268.3	955.633	4317.94
rpoC	CGbielefeld-CDS-genome-2	516493..520494		162672	1496.41	1026.37	7381.08	172265	1141.99	1122.58	6376.03	129803	1768.53	1278.26	6748.82	115074	1787.91	1325.29	7149.52	106777	1420.92	835.935	7397.69	140816	2069.53	1559.34	8060.93
cg0578	CGbielefeld-CDS-genome-2	520670..520852		19	3.82224	2.62164	0.862106	16	2.3196	2.28017	0.592206	12	3.57548	2.58429	0.623913	21	7.13534	5.28905	1.30473	10	2.91017	1.71207	0.692817	24	7.71361	5.81202	1.37387
cg0579	CGbielefeld-CDS-genome-2	520864..521646		252	11.8482	8.1266	11.4343	387	13.1127	12.8899	14.324	202	14.0668	10.1672	10.5025	198	15.7235	11.655	12.3017	149	10.1343	5.96206	10.323	192	14.4224	10.8669	10.9909
cg0580	CGbielefeld-CDS-genome-2	complement(521675..522475)		373	17.1432	11.7583	16.9245	435	14.4079	14.163	16.1006	306	20.8302	15.0557	15.9098	242	18.7858	13.9249	15.0354	172	11.4358	6.72772	11.9164	293	21.5146	16.2107	16.7726
rpsL	CGbielefeld-CDS-genome-2	522693..523061		36480	3639.52	2496.31	1655.24	40213	2891.24	2842.1	1488.4	25264	3733.19	2698.28	1313.54	19666	3313.88	2456.4	1221.84	14145	2041.48	1201.02	979.989	21031	3352.21	2525.81	1203.91
rpsG	CGbielefeld-CDS-genome-2	523068..523535		54516	4288.38	2941.36	2473.61	52720	2988.64	2937.84	1951.32	40526	4721.63	3412.71	2107.06	37100	4929.18	3653.74	2305.01	27044	3077.47	1810.49	1873.65	43362	5449.55	4106.11	2482.23
fusA	CGbielefeld-CDS-genome-2	523883..526012		150732	2605.2	1786.88	6839.32	149715	1864.79	1833.09	5541.39	118002	3020.74	2183.34	6135.25	101194	2954.08	2189.7	6287.16	81193	2030.06	1194.29	5625.19	117905	3255.74	2453.12	6749.4
tuf	CGbielefeld-CDS-genome-2	526375..527565		319330	9870.59	6770.15	14489.3	317221	7066.33	6946.23	11741.3	228542	10463.1	7562.5	11882.5	192791	10065.2	7460.78	11978.1	175926	7866.61	4627.97	12188.4	245301	12113.9	9127.55	14042.1
cg0588	CGbielefeld-CDS-genome-2	528039..528770		285	14.3334	9.83114	12.9316	826	29.9373	29.4285	30.5727	232	17.2815	12.4907	12.0623	203	17.2437	12.7819	12.6123	172	12.5137	7.36189	11.9164	208	16.7128	12.5927	11.9068
cg0589	CGbielefeld-CDS-genome-2	complement(528775..529569)		307	14.2163	9.75082	13.9298	479	15.985	15.7133	17.7292	282	19.3413	13.9795	14.662	275	21.5086	15.9432	17.0857	209	14.0007	8.23666	14.4799	310	22.9346	17.2807	17.7458
cg0590	CGbielefeld-CDS-genome-2	complement(529588..530754)		359	11.325	7.76772	16.2893	573	13.0265	12.8051	21.2084	322	15.0449	10.8742	16.7417	293	15.6115	11.5719	18.204	263	12.002	7.06085	18.2211	434	21.8734	16.4811	24.8441
cg0591	CGbielefeld-CDS-genome-2	complement(530744..531790)		277	9.73976	6.68041	12.5686	517	13.1005	12.8778	19.1357	245	12.7592	9.22211	12.7382	181	10.7493	7.96785	11.2455	142	7.22289	4.24926	9.838	189	10.6173	7.99985	10.8192
cg0592	CGbielefeld-CDS-genome-2	532007..532525		34	2.41172	1.65418	1.54272	56	2.86262	2.81397	2.07272	27	2.83662	2.05025	1.4038	22	2.63574	1.95373	1.36686	18	1.84703	1.08662	1.24707	57	6.45959	4.86714	3.26293
rpsJ	CGbielefeld-CDS-genome-2	533071..533403		58041	6416.61	4401.09	2633.55	62587	4986.36	4901.61	2316.53	45100	7384.76	5337.57	2344.87	42623	7958.78	5899.42	2648.16	28476	4554.12	2679.21	1972.87	48342	8538.42	6433.5	2767.31
rplC	CGbielefeld-CDS-genome-2	533436..534092		132033	7398.31	5074.43	5990.87	143250	5784.6	5686.28	5302.1	93155	7731.17	5587.94	4843.39	80600	7628.1	5654.3	5007.66	57722	4678.92	2752.63	3999.08	91128	8158	6146.86	5216.57
rplD	CGbielefeld-CDS-genome-2	534089..534745		157850	8844.93	6066.65	7162.29	178649	7214.05	7091.43	6612.32	111962	9292.01	6716.09	5821.21	103735	9817.63	7277.29	6445.03	72007	5836.85	3433.85	4988.77	125759	11258.3	8482.82	7199
rplW	CGbielefeld-CDS-genome-2	534745..535050		33410	4019.48	2756.93	1515.95	41249	3576.31	3515.53	1526.75	26369	4698.69	3396.12	1371	20524	4170.49	3091.36	1275.15	18414	3204.76	1885.38	1275.75	27412	5268.86	3969.96	1569.18
rplB	CGbielefeld-CDS-genome-2	535075..535917		112428	4909.78	3367.57	5101.31	143036	4501.54	4425.03	5294.18	86175	5573.88	4028.7	4480.48	73363	5411.23	4011.06	4558.03	67018	4233.83	2490.78	4643.12	103298	7207.12	5430.39	5913.23
rpsS	CGbielefeld-CDS-genome-2	535934..536212		27801	3668.36	2516.09	1261.44	47494	4516.25	4439.49	1757.89	20600	4025.94	2909.87	1071.05	13178	2936.92	2176.98	818.746	14494	2766.64	1627.63	1004.17	16257	3427.15	2582.28	930.622
rplV	CGbielefeld-CDS-genome-2	536216..536578		69849	7083.84	4858.74	3169.33	73049	5338.89	5248.15	2703.76	51867	7790.92	5631.13	2696.71	44823	7677.87	5691.2	2784.84	42284	6203.53	3649.57	2929.51	62949	10199.5	7685.09	3603.48
rpsC	CGbielefeld-CDS-genome-2	536578..537324		139161	6858.23	4704	6314.29	169597	6023.39	5921.02	6277.28	101326	7396.13	5345.78	5268.22	88798	7391.44	5478.88	5517	83222	5933.17	3490.52	5765.76	124600	9810.58	7392.04	7132.65
rplP	CGbielefeld-CDS-genome-2	537327..537743		40821	3603.82	2471.82	1852.21	87874	5590.72	5495.7	3252.47	29362	3839.32	2774.98	1526.61	19152	2855.78	2116.84	1189.91	19439	2482.6	1460.53	1346.77	22336	3150.41	2373.76	1278.61
rpmC	CGbielefeld-CDS-genome-2	537743..537973		47502	7570.33	5192.42	2155.36	46181	5303.9	5213.75	1709.29	31339	7397.37	5346.68	1629.4	28726	7732.32	5731.56	1784.74	26244	6050.45	3559.51	1818.23	44121	11233.9	8464.48	2525.68
rpsQ	CGbielefeld-CDS-genome-2	537976..538254		90052	11882.4	8150.03	4086.02	89163	8478.6	8334.49	3300.18	69776	13636.6	9856.27	3627.85	65129	14515	10759.2	4046.45	72491	13837.2	8140.52	5022.3	103354	21788.2	16416.9	5916.44
cg0606	CGbielefeld-CDS-genome-2	complement(538377..538646)		90	12.2714	8.41683	4.08366	189	18.5713	18.2556	6.99544	53	10.7033	7.73612	2.75562	49	11.2844	8.36454	3.04436	24	4.73388	2.78496	1.66276	56	12.1989	9.1916	3.20569
cg0607	CGbielefeld-CDS-genome-2	complement(538714..539412)		201	10.5861	7.26087	9.12018	279	10.5894	10.4094	10.3266	147	11.4669	8.28803	7.64294	122	10.8525	8.04437	7.57983	87	6.62844	3.89955	6.02751	120	10.0972	7.60801	6.86933
rplN	CGbielefeld-CDS-genome-2	539740..540108		67650	6749.27	4629.26	3069.55	71674	5153.22	5065.64	2652.86	47859	7071.99	5111.5	2488.32	37075	6247.43	4630.89	2303.46	34304	4950.94	2912.66	2376.64	51777	8252.92	6218.38	2963.94
rplX	CGbielefeld-CDS-genome-2	540111..540425		37752	4412.09	3026.21	1712.96	28353	2387.99	2347.4	1049.43	25335	4385.45	3169.72	1317.24	23314	4602.07	3411.27	1448.49	21162	3577.8	2104.84	1466.14	37043	6916.6	5211.5	2120.5
rplE	CGbielefeld-CDS-genome-2	540425..541000		79520	5082.4	3485.97	3608.14	89224	4109.63	4039.78	3302.44	59482	5630.76	4069.81	3092.63	53337	5757.75	4267.91	3313.82	44216	4088.15	2405.08	3063.36	69968	7144.54	5383.24	4005.28
cg0611	CGbielefeld-CDS-genome-2	541107..542081		61	2.30325	1.57978	2.76782	119	3.23807	3.18303	4.40453	46	2.57251	1.85936	2.39167	37	2.35963	1.74907	2.2988	30	1.63865	0.964026	2.07845	37	2.232	1.68176	2.11804
dkg	CGbielefeld-CDS-genome-2	complement(542086..542895)		154	6.99924	4.80071	6.9876	311	10.1864	10.0132	11.511	114	7.67404	5.54665	5.92717	87	6.67853	4.95044	5.40529	124	8.15279	4.79633	8.59093	133	9.65748	7.27668	7.6135
cg0614	CGbielefeld-CDS-genome-2	complement(542917..543411)		104	7.7347	5.30516	4.7189	195	10.4514	10.2737	7.21752	90	9.91383	7.16553	4.67935	71	8.91866	6.61093	4.41121	54	5.80976	3.41791	3.74121	74	8.79273	6.62511	4.23608
fdhD	CGbielefeld-CDS-genome-2	complement(543411..544328)		99	3.97016	2.72309	4.49203	178	5.14424	5.0568	6.5883	107	6.35544	4.59359	5.56322	69	4.67362	3.4643	4.28695	59	3.42278	2.01364	4.08762	74	4.74118	3.57236	4.23608
cg0617	CGbielefeld-CDS-genome-2	complement(544331..544669)		31	3.36649	2.30904	1.40659	91	7.12173	7.00068	3.36817	26	4.18194	3.02263	1.35181	17	3.11814	2.31131	1.05621	34	5.34132	3.14233	2.35558	31	5.37848	4.05255	1.77458
fdhF	CGbielefeld-CDS-genome-2	complement(544753..547041)		588	9.45685	6.48637	26.6799	631	7.31353	7.18923	23.3551	583	13.8876	10.0377	30.3118	457	12.4142	9.20195	28.3933	351	8.1664	4.80434	24.3179	607	15.597	11.7519	34.7473
cg0620	CGbielefeld-CDS-genome-2	547457..548086		2234	130.544	89.5391	101.366	1855	78.1173	76.7896	68.6589	1840	159.251	115.103	95.6667	1563	154.264	114.348	97.1088	1519	128.406	75.5421	105.239	1995	186.251	140.336	114.203
cg0621	CGbielefeld-CDS-genome-2	complement(548183..548989)		2610	119.064	81.6652	118.426	2339	76.8954	75.5885	86.5732	2042	137.971	99.7225	106.169	1553	119.659	88.6967	96.4875	1518	100.177	58.9346	105.17	1670	121.714	91.7085	95.5981
cg0622	CGbielefeld-CDS-genome-2	complement(548986..550695)		9474	203.963	139.897	429.874	6863	106.478	104.669	254.02	7130	227.351	164.325	370.708	6404	232.864	172.61	397.879	5934	184.808	108.724	411.118	7526	258.86	195.045	430.821
cg0623	CGbielefeld-CDS-genome-2	complement(550695..551843)		10443	334.596	229.496	473.841	9085	209.773	206.207	336.262	8470	401.946	290.519	440.379	7508	406.304	301.171	466.47	7043	326.443	192.048	487.951	7804	399.48	300.998	446.735
cg0624	CGbielefeld-CDS-genome-2	complement(551850..552926)		9820	335.669	230.232	445.573	7882	194.162	190.862	291.736	7640	386.796	279.569	397.225	6187	357.2	264.773	384.397	5062	250.309	147.258	350.704	6090	332.582	250.593	348.618
cg0625	CGbielefeld-CDS-genome-2	complement(552944..554128)		11433	355.187	243.619	518.761	11623	260.222	255.799	430.201	7945	365.578	264.233	413.082	4945	259.474	192.335	307.232	3814	171.408	100.84	264.24	3757	186.475	140.504	215.067
cg0627	CGbielefeld-CDS-genome-2	complement(554451..554975)		37	2.59452	1.77956	1.67884	56	2.82991	2.78181	2.07272	29	3.01192	2.17696	1.50779	26	3.07936	2.28257	1.61537	16	1.62304	0.954845	1.10851	37	4.14514	3.12327	2.11804
rpsH	CGbielefeld-CDS-genome-2	555339..555731		46407	4347.16	2981.68	2105.67	79720	5381.69	5290.22	2950.67	32155	4461.29	3224.53	1671.83	21950	3472.87	2574.25	1363.75	18510	2508.32	1475.66	1282.4	22514	3369.44	2538.79	1288.8
rplF	CGbielefeld-CDS-genome-2	555751..556287		111971	7676.2	5265.04	5080.58	93453	4617.03	4538.56	3458.97	75449	7660.96	5537.2	3922.8	75080	8693.54	6444.06	4664.7	54183	5373.51	3161.26	3753.89	96458	10564.8	7960.32	5521.68
rplR	CGbielefeld-CDS-genome-2	556291..556695		71708	6518.2	4470.77	3253.68	71399	4677.14	4597.65	2642.68	48151	6482.68	4685.56	2503.5	41072	6305.76	4674.13	2551.79	36485	4797.65	2822.48	2527.74	54753	7951.52	5991.28	3134.3
rpsE	CGbielefeld-CDS-genome-2	556736..557371		109408	6332.97	4343.72	4964.28	139659	5825.8	5726.78	5169.18	77225	6620.72	4785.33	4015.14	68129	6660.73	4937.24	4232.84	55292	4629.93	2723.81	3830.72	82036	7586.56	5716.29	4696.1
rpmD	CGbielefeld-CDS-genome-2	557375..557560		38755	7670.61	5261.2	1758.47	24537	3499.87	3440.39	908.185	25509	7477.99	5404.95	1326.28	24271	8113.75	6014.29	1507.95	20845	5968.41	3511.24	1444.18	35635	11268.4	8490.45	2039.9
rplO	CGbielefeld-CDS-genome-2	557567..558013		81496	6711.88	4603.61	3697.8	80393	4771.49	4690.4	2975.58	69518	8479.96	6129.16	3614.43	60830	8461.69	6272.2	3779.35	64836	7724.64	4544.44	4491.95	79627	10477.3	7894.41	4558.2
cg0635	CGbielefeld-CDS-genome-2	complement(558196..558519)		111	12.6123	8.65064	5.03652	205	16.7862	16.5009	7.58764	81	13.6315	9.8526	4.21141	53	10.1713	7.53946	3.29288	34	5.5886	3.2878	2.35558	61	11.0734	8.34356	3.49191
cg0636	CGbielefeld-CDS-genome-2	complement(558606..558971)		33	3.31931	2.27668	1.49734	57	4.13178	4.06156	2.10974	25	3.72446	2.69197	1.29982	28	4.7569	3.52603	1.73963	14	2.03712	1.19845	0.969944	24	3.8568	2.90601	1.37387
betB	CGbielefeld-CDS-genome-2	complement(559143..560636)		95	2.34093	1.60562	4.31053	126	2.2375	2.19947	4.66363	90	3.2847	2.37412	4.67935	96	3.99546	2.96163	5.96446	97	3.45773	2.0342	6.72032	115	4.52735	3.41125	6.5831
cg0638	CGbielefeld-CDS-genome-2	complement(560633..561370)		43	2.145	1.47124	1.95108	47	1.68961	1.66089	1.73961	19	1.40379	1.01463	0.987862	26	2.1906	1.62378	1.61537	52	3.75246	2.20759	3.60265	41	3.26757	2.46204	2.34702
cg0639	CGbielefeld-CDS-genome-2	complement(561367..562635)		43	1.24745	0.855612	1.95108	54	1.12895	1.10976	1.9987	41	1.76168	1.27331	2.1317	37	1.81295	1.34385	2.2988	34	1.42688	0.839439	2.35558	41	1.90029	1.43182	2.34702
fdxB	CGbielefeld-CDS-genome-2	complement(562645..562965)		14	1.6056	1.10127	0.635236	9	0.743843	0.7312	0.333116	9	1.52877	1.10496	0.467935	6	1.16223	0.861501	0.372779	5	0.829534	0.488019	0.346408	16	2.93165	2.20893	0.91591
fabG2	CGbielefeld-CDS-genome-2	complement(562992..563738)		31	1.52776	1.04788	1.40659	25	0.887898	0.872807	0.925322	14	1.02191	0.738615	0.727899	23	1.91449	1.41911	1.42898	13	0.926813	0.545249	0.900662	27	2.12589	1.60181	1.5456
cg0642	CGbielefeld-CDS-genome-2	complement(563731..565638)		103	1.98735	1.3631	4.67352	104	1.4461	1.42152	3.84934	78	2.22905	1.61112	4.05543	64	2.08568	1.54601	3.97631	41	1.14439	0.673252	2.84055	78	2.40444	1.81169	4.46506
cg0644	CGbielefeld-CDS-genome-2	complement(565679..566773)		20	0.672405	0.461196	0.907481	28	0.678403	0.666872	1.03636	22	1.0955	0.791807	1.14384	27	1.53319	1.13647	1.6775	27	1.31316	0.772541	1.87061	20	1.07427	0.809436	1.14489
cytP	CGbielefeld-CDS-genome-2	complement(566798..568090)		38	1.08193	0.742087	1.72421	68	1.39526	1.37154	2.51688	45	1.89766	1.37159	2.33967	26	1.25032	0.926796	1.61537	25	1.0297	0.605778	1.73204	45	2.04697	1.54234	2.576
cg0646	CGbielefeld-CDS-genome-2	complement(568271..569077)		107	4.88119	3.34796	4.85502	160	5.26005	5.17065	5.92206	85	5.74314	4.15103	4.41938	85	6.54926	4.85462	5.28103	106	6.99523	4.11533	7.34386	154	11.2239	8.45695	8.81564
secY	CGbielefeld-CDS-genome-2	569454..570776		11907	331.328	227.255	540.269	13340	267.51	262.963	493.752	8981	370.143	267.532	466.947	8850	415.939	308.314	549.849	6664	268.253	157.815	461.693	7268	323.111	243.457	416.052
adk	CGbielefeld-CDS-genome-2	570776..571321		5831	393.157	269.662	264.576	6303	306.266	301.06	233.292	4830	482.346	348.631	251.125	3725	424.209	314.444	231.433	3444	335.923	197.625	238.606	4699	506.186	381.399	268.991
map1	CGbielefeld-CDS-genome-2	571478..572272		2188	101.32	69.4945	99.2784	2182	72.8168	71.5791	80.7621	1898	130.177	94.0893	98.6822	1725	134.918	100.007	107.174	1632	109.326	64.3169	113.068	2374	175.635	132.337	135.898
cg0650	CGbielefeld-CDS-genome-2	572432..573181		11707	574.645	394.144	531.194	11982	423.85	416.646	443.489	9115	662.674	478.968	473.914	7731	640.945	475.099	480.325	12048	855.506	503.299	834.706	11064	867.657	653.759	633.352
infA	CGbielefeld-CDS-genome-2	573409..573627		35109	5901.87	4048.04	1593.04	61798	7486.42	7359.17	2287.32	26222	6528.69	4718.81	1363.35	18091	5136.47	3807.4	1123.99	20393	4959.14	2917.49	1412.86	20572	5524.97	4162.93	1177.63
rpsM	CGbielefeld-CDS-genome-2	573818..574186		36957	3687.1	2528.95	1676.89	51808	3724.9	3661.59	1917.56	29436	4349.67	3143.86	1530.46	23334	3931.96	2914.56	1449.74	18684	2696.58	1586.41	1294.46	23920	3812.7	2872.77	1369.29
rpsK	CGbielefeld-CDS-genome-2	574189..574593		46610	4236.81	2905.99	2114.88	58787	3850.97	3785.52	2175.88	35106	4726.4	3416.15	1825.26	29197	4482.6	3322.71	1814	24864	3269.53	1923.48	1722.62	34953	5076.06	3824.69	2000.86
rpsD	CGbielefeld-CDS-genome-2	574617..575222		101169	6145.96	4215.46	4590.44	112146	4909.7	4826.25	4150.85	74221	6678.18	4826.86	3858.95	66024	6774.48	5021.56	4102.06	52979	4655.87	2739.07	3670.47	80843	7846.34	5912.03	4627.81
rpoA	CGbielefeld-CDS-genome-2	575340..576356		156753	5674.27	3891.93	7112.51	136471	3560.11	3499.6	5051.19	125431	6724.94	4860.66	6521.5	121722	7442.09	5516.42	7562.56	101893	5335.72	3139.03	7059.32	164133	9492.32	7152.23	9395.69
rplQ	CGbielefeld-CDS-genome-2	576412..576903		51410	3846.78	2638.47	2332.68	76801	4141.38	4071	2842.63	43521	4823.23	3486.14	2262.78	35941	4542.26	3366.93	2233.01	30393	3289.86	1935.44	2105.68	39584	4732.08	3565.51	2265.96
truA	CGbielefeld-CDS-genome-2	577044..577928		1708	71.0493	48.732	77.4988	1991	59.6859	58.6714	73.6927	1216	74.9194	54.1503	63.2232	1061	74.545	55.2563	65.9197	803	48.3216	28.4279	55.6332	979	65.0634	49.0237	56.0423
cg0658	CGbielefeld-CDS-genome-2	578193..580433		3641	59.8128	41.025	165.207	4009	47.4611	46.6544	148.385	3262	79.3682	57.3658	169.6	2754	76.4133	56.6411	171.105	2647	62.9045	37.007	183.389	3288	86.2953	65.0215	188.22
cg0659	CGbielefeld-CDS-genome-2	complement(580434..580892)		698	55.9832	38.3984	31.6711	789	45.6045	44.8294	29.2032	539	64.0295	46.2793	28.0241	379	51.342	38.0571	23.5472	333	38.6368	22.7302	23.0708	374	47.9243	36.1098	21.4094
cg0660	CGbielefeld-CDS-genome-2	complement(580917..581222)		105	12.6323	8.66439	4.76427	107	9.27697	9.11929	3.96038	80	14.2552	10.3034	4.15942	68	13.8176	10.2423	4.22483	48	8.3539	4.91464	3.32552	66	12.6859	9.55849	3.77813
cg0661	CGbielefeld-CDS-genome-2	581407..582666		76	2.22054	1.52305	3.44843	108	2.27403	2.23538	3.99739	36	1.55789	1.12601	1.87174	58	2.86223	2.12162	3.60353	58	2.45147	1.44221	4.01834	97	4.52792	3.41168	5.55271
cg0662	CGbielefeld-CDS-genome-2	582685..584232		302	7.18209	4.92613	13.703	338	5.79281	5.69436	12.5104	232	8.17187	5.90647	12.0623	216	8.6762	6.4312	13.42	258	8.87602	5.22181	17.8747	311	11.8164	8.90341	17.803
cma	CGbielefeld-CDS-genome-2	584344..585624		318	9.13888	6.26827	14.4289	463	9.58905	9.42607	17.137	259	11.0244	7.96822	13.4661	220	10.6787	7.91559	13.6686	201	8.35634	4.91608	13.9256	207	9.50426	7.16124	11.8496
cg0664	CGbielefeld-CDS-genome-2	585824..586252		354	30.3781	20.8361	16.0624	584	36.116	35.5021	21.6155	293	37.2404	26.9167	15.2339	247	35.8003	26.5368	15.3461	247	30.6626	18.039	17.1126	321	44.0094	33.16	18.3754
cg0665	CGbielefeld-CDS-genome-2	complement(586397..587641)		148	4.3763	3.00167	6.71536	306	6.52072	6.40989	11.3259	122	5.34312	3.8619	6.34312	72	3.59592	2.66546	4.47334	63	2.69489	1.58542	4.36475	58	2.74003	2.06455	3.32017
cg0666	CGbielefeld-CDS-genome-2	complement(587643..589025)		24	0.638858	0.438187	1.08898	39	0.748146	0.73543	1.4435	23	0.906797	0.655415	1.19583	26	1.16896	0.866484	1.61537	36	1.38628	0.815553	2.49414	48	2.04134	1.5381	2.74773
cg0668	CGbielefeld-CDS-genome-2	589240..592866		51	0.517652	0.355053	2.31408	82	0.599805	0.58961	3.03506	45	0.676502	0.488963	2.33967	40	0.685739	0.508302	2.48519	59	0.866311	0.509655	4.08762	41	0.664865	0.50096	2.34702
cg0669	CGbielefeld-CDS-genome-2	592863..593765		41	1.67152	1.14648	1.86034	76	2.2329	2.19495	2.81298	33	1.99265	1.44025	1.71576	32	2.20348	1.63332	1.98815	38	2.24112	1.31846	2.6327	48	3.12645	2.3557	2.74773
cg0671	CGbielefeld-CDS-genome-2	593936..594262		40	4.50326	3.08875	1.81496	37	3.00191	2.95089	1.36948	24	4.00191	2.89251	1.24783	14	2.66212	1.97328	0.869817	18	2.93153	1.72463	1.24707	17	3.05773	2.30392	0.973155
cg0672	CGbielefeld-CDS-genome-2	594294..594584		7	0.885565	0.6074	0.317618	17	1.54989	1.52354	0.629219	10	1.87375	1.35431	0.519928	2	0.42735	0.316772	0.12426	3	0.549032	0.322998	0.207845	4	0.808471	0.609163	0.228978
rplM	CGbielefeld-CDS-genome-2	594940..595383		68107	5647.08	3873.28	3090.29	82025	4901.25	4817.95	3035.98	44851	5507.99	3981.07	2331.93	35641	4991.3	3699.78	2214.37	28606	3431.18	2018.58	1981.87	47801	6332.15	4771.12	2736.34
rpsI	CGbielefeld-CDS-genome-2	595383..595931		35469	2378.44	1631.35	1609.37	65552	3167.8	3113.96	2426.27	25063	2489.23	1799.17	1303.09	18330	2076.04	1538.86	1138.84	13372	1297.16	763.126	926.435	19893	2131.21	1605.81	1138.76
mrsA	CGbielefeld-CDS-genome-2	596110..597453		1587	43.4703	29.8159	72.0086	1649	32.5511	31.9978	61.0343	1340	54.3638	39.2931	69.6703	1268	58.6633	43.484	78.7806	880	34.8701	20.5142	60.9679	1802	78.8593	59.4186	103.154
cg0676	CGbielefeld-CDS-genome-2	597893..598198		8	0.962462	0.660144	0.362992	11	0.953707	0.937497	0.407142	8	1.42552	1.03034	0.415942	5	1.016	0.753109	0.310649	4	0.696158	0.409553	0.277127	5	0.96105	0.724128	0.286222
cg0678	CGbielefeld-CDS-genome-2	598195..599706		51	1.24175	0.851703	2.31408	74	1.29845	1.27638	2.73895	48	1.73099	1.25112	2.49565	42	1.72721	1.28029	2.60945	32	1.12711	0.663087	2.21701	60	2.33398	1.7586	3.43466
cg0679	CGbielefeld-CDS-genome-2	599700..599936		20	3.10668	2.13084	0.907481	39	4.36576	4.29156	1.4435	9	2.07061	1.4966	0.467935	20	5.24721	3.88948	1.2426	21	4.7189	2.77615	1.45492	31	7.69326	5.79669	1.77458
cg0680	CGbielefeld-CDS-genome-2	complement(600020..600877)		1164	49.9437	34.2559	52.8154	1742	53.8647	52.9492	64.4765	1051	66.7913	48.2755	54.6444	889	64.426	47.7556	55.2334	960	59.5872	35.0555	66.5104	1464	100.358	75.6172	83.8058
alr	CGbielefeld-CDS-genome-2	600972..602057		522	17.6952	12.137	23.6852	615	15.0241	14.7688	22.7629	476	23.8991	17.2738	24.7486	379	21.6998	16.0849	23.5472	297	14.5645	8.56838	20.5767	421	22.8008	17.1798	24.0999
cg0682	CGbielefeld-CDS-genome-2	602081..602578		314	23.2122	15.921	14.2474	379	20.1908	19.8476	14.0279	314	34.3799	24.8491	16.3257	334	41.7027	30.912	20.7513	242	25.8795	15.225	16.7662	433	51.1394	38.5323	24.7868
cg0683	CGbielefeld-CDS-genome-2	602812..604413		753	17.304	11.8687	34.1666	731	12.1059	11.9002	27.0564	677	23.0425	16.6547	35.1991	872	33.8455	25.0879	54.1772	1661	55.2175	32.4847	115.077	2600	95.4571	71.9246	148.835
papA	CGbielefeld-CDS-genome-2	604429..605712		939	26.9225	18.4659	42.6062	817	16.8811	16.5942	30.2395	6039	256.451	185.358	313.984	7390	357.871	265.27	459.139	734	30.4439	17.9103	50.8528	1204	55.1517	41.5555	68.9222
cg0685	CGbielefeld-CDS-genome-2	605719..606396		582	31.6016	21.6752	26.4077	815	31.8913	31.3492	30.1655	2109	169.61	122.591	109.653	2289	209.924	155.606	142.215	240	18.8517	11.0906	16.6276	320	27.7599	20.9164	18.3182
cg0686	CGbielefeld-CDS-genome-2	606393..606902		378	27.2858	18.7151	17.1514	556	28.9233	28.4317	20.5792	1434	153.314	110.813	74.5576	1481	180.564	133.843	92.0142	157	16.3945	9.64498	10.8772	250	28.8315	21.7238	14.3111
gcp	CGbielefeld-CDS-genome-2	606906..607940		1130	40.1933	27.5682	51.2726	1324	33.9384	33.3616	49.0051	3821	201.299	145.495	198.664	4372	262.655	194.693	271.631	677	34.8352	20.4937	46.9037	1077	61.203	46.115	61.6522
cg0688	CGbielefeld-CDS-genome-2	607959..609683		990	21.1281	14.4916	44.9203	1073	16.5027	16.2222	39.7148	2225	70.3307	50.8337	115.684	2581	93.0348	68.9618	160.357	830	25.6247	15.0751	57.5038	1012	34.5055	25.9991	57.9313
cg0689	CGbielefeld-CDS-genome-2	609748..610179		39	3.3235	2.27956	1.76959	51	3.13206	3.07883	1.88766	86	10.8547	7.84559	4.47138	73	10.5072	7.78841	4.53547	32	3.9449	2.3208	2.21701	31	4.22061	3.18013	1.77458
groES	CGbielefeld-CDS-genome-2	610349..610648		779	95.5942	65.5671	35.3464	1072	94.8019	93.1906	39.6778	370	67.2488	48.6062	19.2373	308	63.8375	47.3194	19.136	384	68.1678	40.1035	26.6042	625	122.534	92.3263	35.7777
groEL'	CGbielefeld-CDS-genome-2	610660..611034		1203	118.1	81.0036	54.585	1114	78.813	77.4734	41.2324	688	100.037	72.305	35.771	645	106.949	79.2753	40.0737	844	119.862	70.5153	58.4737	1274	199.818	150.558	72.9293
tnp1c(ISCg1c)	CGbielefeld-CDS-genome-2	611123..612433		36	1.01092	0.693378	1.63346	72	1.45705	1.43228	2.66493	28	1.16455	0.841717	1.4558	21	0.996009	0.738289	1.30473	15	0.609338	0.358476	1.03923	31	1.39077	1.04791	1.77458
'groEL	CGbielefeld-CDS-genome-2	612457..613737		68	1.95423	1.34039	3.08543	80	1.65686	1.62869	2.96103	58	2.46878	1.78439	3.01558	55	2.66969	1.9789	3.41714	60	2.49443	1.46749	4.1569	47	2.15797	1.62598	2.69049
whiB3	CGbielefeld-CDS-genome-2	complement(613876..614175)		18	2.20885	1.51503	0.816732	9	0.795912	0.782384	0.333116	6	1.09052	0.788208	0.311957	2	0.414529	0.307269	0.12426	12	2.13024	1.25323	0.83138	9	1.76449	1.3295	0.515199
sigD	CGbielefeld-CDS-genome-2	614617..615183		344	22.3352	15.3195	15.6087	522	24.4248	24.0097	19.3207	287	27.5996	19.9485	14.9219	277	30.3769	22.5168	17.2099	150	14.0889	8.28858	10.3923	229	23.7547	17.8986	13.109
cg0697	CGbielefeld-CDS-genome-2	615183..616211		3463	123.895	84.9781	157.13	3208	82.7109	81.3051	118.737	3120	165.327	119.495	162.217	2787	168.41	124.833	173.156	2554	132.183	77.7638	176.945	2112	120.719	90.9589	120.9
cg0698	CGbielefeld-CDS-genome-2	complement(616261..616641)		481	46.4767	31.8779	21.8249	576	40.1089	39.4272	21.3194	406	58.1039	41.9964	21.1091	264	43.0849	31.9366	16.4023	431	60.2451	35.4425	29.8604	378	58.3531	43.9677	21.6384
guaB2	CGbielefeld-CDS-genome-2	616797..618317		21062	509.783	349.656	955.668	24291	423.701	416.5	899.08	19116	685.286	495.312	993.894	13908	568.568	421.449	864.101	12796	448.038	263.583	886.528	10951	423.469	319.074	626.883
guaB3	CGbielefeld-CDS-genome-2	618434..619558		4607	150.758	103.404	209.038	5369	126.615	124.463	198.722	5438	263.567	190.501	282.737	4477	247.446	183.419	278.155	3042	144.004	84.7186	210.755	3430	179.324	135.116	196.348
cg0701	CGbielefeld-CDS-genome-2	complement(619551..620456)		374	15.197	10.4235	16.9699	657	19.2389	18.9119	24.3175	420	25.277	18.2697	21.837	366	25.1188	18.6193	22.7395	224	13.1671	7.74626	15.5191	194	12.5942	9.48943	11.1054
cg0702	CGbielefeld-CDS-genome-2	620547..621458		23	0.928428	0.6368	1.0436	24	0.698168	0.686302	0.88831	11	0.657661	0.475345	0.57192	18	1.22723	0.909677	1.11834	18	1.05111	0.618372	1.24707	37	2.38619	1.79793	2.11804
guaA	CGbielefeld-CDS-genome-2	621465..623036		15381	360.203	247.06	697.898	15969	269.506	264.926	591.059	12941	448.869	324.434	672.838	10984	434.465	322.046	682.434	9827	332.918	195.858	680.831	13023	487.254	367.135	745.494
cg0704	CGbielefeld-CDS-genome-2	623178..623621		213	17.6609	12.1134	9.66467	323	19.3003	18.9722	11.9552	174	21.3683	15.4446	9.04674	258	36.1313	26.7822	16.0295	356	42.7008	25.1211	24.6643	639	84.6477	63.78	36.5792
cg0705	CGbielefeld-CDS-genome-2	623739..623921		3	0.603511	0.413943	0.136122	14	2.02965	1.99515	0.518181	7	2.0857	1.5075	0.363949	3	1.01933	0.755579	0.186389	9	2.61915	1.54086	0.623535	8	2.5712	1.93734	0.457955
cg0706	CGbielefeld-CDS-genome-2	complement(623918..624991)		257	8.80935	6.04225	11.6611	1304	32.212	31.6645	48.2648	230	11.6769	8.43985	11.9583	233	13.4896	9.99911	14.4762	266	13.1901	7.75978	18.4289	315	17.2506	12.9979	18.032
cgtS7	CGbielefeld-CDS-genome-2	625132..626403		257	7.43809	5.10171	11.6611	514	10.7206	10.5384	19.0246	895	38.3654	27.7298	46.5335	1156	56.509	41.8871	71.822	254	10.6345	6.25632	17.5975	245	11.3286	8.53583	14.0249
cgtR7	CGbielefeld-CDS-genome-2	626446..627138		401	21.3023	14.611	18.195	610	23.3529	22.956	22.5779	444	34.9345	25.25	23.0848	423	37.9537	28.133	26.2809	291	22.363	13.1562	20.161	384	32.5908	24.5564	21.9818
cg0710	CGbielefeld-CDS-genome-2	627138..627464		143	16.0992	11.0423	6.48849	236	19.1473	18.8219	8.73504	111	18.5089	13.3778	5.7712	112	21.2969	15.7863	6.95854	104	16.9377	9.96455	7.2053	87	15.6484	11.7907	4.98026
cg0711	CGbielefeld-CDS-genome-2	complement(627528..628019)		327	24.468	16.7823	14.8373	446	24.0499	23.6411	16.5078	432	47.8766	34.6043	22.4609	308	38.9253	28.8533	19.136	140	15.1542	8.91528	9.69944	203	24.2677	18.2851	11.6206
cg0712	CGbielefeld-CDS-genome-2	complement(628035..629000)		324	12.3476	8.46911	14.7012	429	11.7821	11.5819	15.8785	523	29.5208	21.3371	27.1922	491	31.6047	23.4268	30.5057	127	7.00158	4.11906	8.79877	151	9.19384	6.92734	8.6439
cg0713	CGbielefeld-CDS-genome-2	629269..630015		81	3.9919	2.73801	3.6753	105	3.72917	3.66579	3.88635	171	12.4819	9.02166	8.89076	120	9.98866	7.40406	7.45557	49	3.49337	2.05517	3.3948	127	9.99955	7.53442	7.27004
cg0714	CGbielefeld-CDS-genome-2	630012..631604		254	5.86993	4.02613	11.525	330	5.49594	5.40253	12.2143	210	7.18799	5.19535	10.9185	238	9.28983	6.88606	14.7869	154	5.14842	3.02884	10.6694	275	10.1535	7.65039	15.7422
cg0715	CGbielefeld-CDS-genome-2	complement(631609..632247)		3501	201.7	138.344	158.854	4452	184.841	181.699	164.781	2207	188.324	136.117	114.748	1636	159.195	118.003	101.644	1171	97.5945	57.4154	81.1289	1468	135.121	101.81	84.0348
cg0716	CGbielefeld-CDS-genome-2	632410..633273		268	11.4192	7.83233	12.1602	463	14.2171	13.9755	17.137	274	17.2918	12.4982	14.246	234	16.8403	12.4828	14.5384	218	13.4373	7.90523	15.1034	263	17.9036	13.4899	15.0553
crtEb	CGbielefeld-CDS-genome-2	complement(633282..634145)		369	15.7227	10.7841	16.743	618	18.9766	18.6541	22.874	279	17.6074	12.7263	14.506	187	13.4578	9.97556	11.6183	184	11.3416	6.67231	12.7478	194	13.2064	9.95073	11.1054
crtYf	CGbielefeld-CDS-genome-2	complement(634148..634540)		122	11.4283	7.83858	5.53563	211	14.2441	14.002	7.80972	90	12.4869	9.02528	4.67935	61	9.65126	7.15396	3.78992	80	10.8409	6.37778	5.54253	100	14.966	11.2765	5.72444
crtYe	CGbielefeld-CDS-genome-2	complement(634537..634986)		177	14.4802	9.93186	8.0312	313	18.4534	18.1397	11.585	153	18.5389	13.3995	7.95489	141	19.4829	14.4416	8.7603	171	20.2373	11.9057	11.8472	277	36.2047	27.2793	15.8567
crtI2	CGbielefeld-CDS-genome-2	complement(634990..636639)		558	12.4499	8.53926	25.3187	888	14.2782	14.0355	32.8675	481	15.8952	11.4887	25.0085	424	15.9782	11.8438	26.343	338	10.9094	6.41807	23.4172	701	24.988	18.8279	40.1283
crtB2	CGbielefeld-CDS-genome-2	complement(636636..637550)		234	9.41477	6.45751	10.6175	339	9.82929	9.66223	12.5474	215	12.8121	9.26037	11.1784	223	15.1541	11.2329	13.8549	233	13.5614	7.97824	16.1426	278	17.8699	13.4645	15.9139
cg0722	CGbielefeld-CDS-genome-2	complement(637547..639739)		1029	17.274	11.848	46.6899	1370	16.5739	16.2922	50.7077	1036	25.7588	18.618	53.8645	930	26.3688	19.5458	57.7807	712	17.2906	10.1722	49.3286	1176	31.5403	23.7649	67.3194
crtE	CGbielefeld-CDS-genome-2	complement(639775..640893)		199	6.54694	4.49048	9.02943	441	10.4557	10.278	16.3227	184	8.96586	6.48035	9.56667	163	9.05741	6.71378	10.1272	106	5.04481	2.96789	7.34386	255	13.4032	10.099	14.5973
cg0725	CGbielefeld-CDS-genome-2	641085..641672		828	51.8404	35.5568	37.5697	1144	51.617	50.7397	42.3428	609	56.4734	40.8179	31.6636	539	56.9978	42.2494	33.488	437	39.5798	23.285	30.2761	700	70.0193	52.7579	40.0711
cg0726	CGbielefeld-CDS-genome-2	complement(641690..642340)		916	51.8	35.5291	41.5626	1485	60.5186	59.49	54.9642	799	66.9222	48.3701	41.5422	785	74.9782	55.5774	48.7719	580	47.4478	27.9138	40.1834	1242	112.212	84.5488	71.0975
cg0727	CGbielefeld-CDS-genome-2	642408..644021		681	15.5331	10.654	30.8997	1393	22.8977	22.5085	51.559	576	19.4591	14.0647	29.9478	432	16.6428	12.3364	26.8401	368	12.1427	7.14359	25.4957	528	19.241	14.4976	30.225
phr	CGbielefeld-CDS-genome-2	complement(644014..645462)		565	14.3547	9.84578	25.6363	851	15.5813	15.3165	31.498	500	18.8151	13.5992	25.9964	412	17.6797	13.105	25.5975	340	12.4963	7.35161	23.5558	426	17.2917	13.0289	24.3861
cg0730	CGbielefeld-CDS-genome-2	645487..646242		652	31.7498	21.7769	29.5839	1177	41.3046	40.6026	43.5642	525	37.8653	27.3683	27.2962	383	31.5009	23.35	23.7957	377	26.5576	15.624	26.1192	556	43.2564	32.5927	31.8279
cg0732	CGbielefeld-CDS-genome-2	complement(646634..649051)		3961	60.3064	41.3636	179.727	4653	51.0529	50.1852	172.221	3197	72.0926	52.1071	166.221	2721	69.9711	51.8659	169.055	2570	56.6039	33.3004	178.054	2763	67.2081	50.6397	158.166
cg0733	CGbielefeld-CDS-genome-2	complement(649051..649770)		1184	60.5389	41.523	53.7228	1603	59.067	58.063	59.3317	851	64.4468	46.5809	44.2458	586	50.6071	37.5124	36.4081	511	37.797	22.2362	35.4029	472	38.5573	29.052	27.0194
cg0734	CGbielefeld-CDS-genome-2	complement(649773..649892)		0	0	0	0	0	0	0	0	0	0	0	0	0	0	0	0	0	0	0	0	0	0	0	0
cg0735	CGbielefeld-CDS-genome-2	complement(649898..650575)		1088	59.0764	40.52	49.3669	1122	43.9043	43.1581	41.5285	748	60.1556	43.4793	38.8906	594	54.4758	40.38	36.9051	583	45.794	26.9408	40.3912	737	63.9345	48.1731	42.1891
cg0736	CGbielefeld-CDS-genome-2	complement(650572..651654)		2266	77.0276	52.8325	102.818	2187	53.5752	52.6646	80.9472	1508	75.9237	54.8762	78.4051	1186	68.0931	50.4738	73.6859	1022	50.2565	29.5661	70.8059	1640	89.0662	67.1092	93.8808
cg0737	CGbielefeld-CDS-genome-2	complement(651850..652749)		8677	354.93	243.443	393.71	8009	236.091	232.078	296.436	3872	234.583	169.552	201.316	4041	279.186	206.945	251.066	3206	189.71	111.607	222.117	4695	306.825	231.185	268.762
dnaE2	CGbielefeld-CDS-genome-2	652909..656076		94	1.09234	0.749226	4.26516	138	1.15568	1.13604	5.10778	53	0.91221	0.659328	2.75562	66	1.2954	0.960215	4.10057	73	1.22718	0.721954	5.05756	134	2.48781	1.8745	7.67075
cg0739	CGbielefeld-CDS-genome-2	656095..656586		327	24.468	16.7823	14.8373	424	22.8636	22.475	15.6935	270	29.9228	21.6277	14.038	273	34.502	25.5745	16.9614	296	32.0403	18.8494	20.5074	333	39.8086	29.9948	19.0624
cg0740	CGbielefeld-CDS-genome-2	656583..657998		678	17.6271	12.0903	30.7636	902	16.9	16.6128	33.3856	527	20.2932	14.6676	27.4002	535	23.4929	17.4141	33.2394	437	16.4357	9.66919	30.2761	536	22.2638	16.7752	30.683
sirR	CGbielefeld-CDS-genome-2	658008..658679		293	16.0514	11.0095	13.2946	419	16.542	16.2609	15.5084	647	52.4976	37.9442	33.6393	719	66.5283	49.3139	44.6713	201	15.9293	9.37128	13.9256	343	30.0208	22.6199	19.6348
cg0742	CGbielefeld-CDS-genome-2	complement(658663..659457)		198	9.16882	6.2888	8.98406	247	8.24278	8.10268	9.14219	2362	162.001	117.091	122.807	2886	225.723	167.316	179.307	105	7.03382	4.13804	7.27458	208	15.3884	11.5948	11.9068
cg0745	CGbielefeld-CDS-genome-2	659616..660392		409	19.3784	13.2914	18.558	369	12.5994	12.3852	13.6578	412	28.9122	20.8972	21.421	453	36.2513	26.8712	28.1448	323	22.1386	13.0243	22.378	553	41.8602	31.5407	31.6561
cg0747	CGbielefeld-CDS-genome-2	660394..660888		108	8.03219	5.5092	4.90039	104	5.57406	5.47932	3.84934	93	10.2443	7.40438	4.83533	94	11.8078	8.7525	5.8402	47	5.05664	2.97485	3.25624	63	7.4857	5.6403	3.6064
cg0748	CGbielefeld-CDS-genome-2	661004..662002		353	13.0084	8.92235	16.017	494	13.1191	12.8962	18.2844	277	15.1188	10.9276	14.402	223	13.8799	10.2884	13.8549	181	9.649	5.67656	12.54	191	11.2451	8.47295	10.9337
spoU	CGbielefeld-CDS-genome-2	complement(662108..662581)		617	47.9206	32.8683	27.9958	848	47.4637	46.6569	31.3869	449	51.6502	37.3318	23.3447	346	45.3883	33.644	21.4969	245	27.5269	16.1942	16.974	293	36.3569	27.394	16.7726
folD	CGbielefeld-CDS-genome-2	662627..663481		8353	359.659	246.687	379.009	7972	247.369	243.164	295.067	6786	432.765	312.794	352.823	5715	415.62	308.077	355.072	6190	385.562	226.828	428.854	6826	469.567	353.807	390.75
cg0751	CGbielefeld-CDS-genome-2	663488..663838		777	81.4946	55.8964	35.2556	798	60.317	59.2918	29.5363	628	97.5566	70.5121	32.6515	470	83.2602	61.7164	29.201	495	75.1048	44.1845	34.2944	477	79.9298	60.2252	27.3056
cg0752	CGbielefeld-CDS-genome-2	complement(663840..665222)		1136	30.2393	20.7408	51.5449	1489	28.5638	28.0783	55.1122	1122	44.2359	31.9729	58.3359	967	43.4761	32.2265	60.0795	715	27.533	16.1978	49.5364	1212	51.544	38.8371	69.3802
cg0753	CGbielefeld-CDS-genome-2	complement(665584..666549)		1006	38.3386	26.2961	45.6463	1554	42.6793	41.9539	57.518	934	52.7198	38.1049	48.5612	625	40.23	29.8203	38.8311	475	26.187	15.406	32.9088	467	28.4339	21.4243	26.7331
metX	CGbielefeld-CDS-genome-2	complement(666641..667774)		844	27.3996	18.7931	38.2957	1417	33.1513	32.5878	52.4473	395	18.9928	13.7276	20.5371	373	20.4523	15.1602	23.1744	248	11.6468	6.85189	17.1819	287	14.8856	11.2159	16.4291
metY	CGbielefeld-CDS-genome-2	complement(667918..669231)		1263	35.3853	24.2705	57.3074	1790	36.1411	35.5268	66.2531	592	24.5658	17.7557	30.7797	841	39.7967	29.4992	52.2511	694	28.1277	16.5476	48.0815	982	43.9555	33.1194	56.214
cstA	CGbielefeld-CDS-genome-2	669663..671942		7720	124.652	85.4973	350.287	7229	84.1176	82.6879	267.566	9538	228.101	164.867	495.907	8953	244.163	180.985	556.248	5142	120.107	70.6593	356.246	6905	178.126	134.213	395.272
cg0757	CGbielefeld-CDS-genome-2	671946..672149		179	32.3026	22.1561	8.12195	114	14.8258	14.5738	4.21947	240	64.1483	46.3652	12.4783	317	96.6219	71.6207	19.6951	218	56.9109	33.481	15.1034	272	78.4217	59.0888	15.5705
cg0758	CGbielefeld-CDS-genome-2	672355..672474		0	0	0	0	0	0	0	0	0	0	0	0	0	0	0	0	0	0	0	0	0	0	0	0
prpD2	CGbielefeld-CDS-genome-2	672615..674129		994	24.154	16.567	45.1018	3420	59.8904	58.8725	126.584	1279	46.0322	33.2712	66.4987	3452	141.679	105.019	214.472	67	2.35522	1.38559	4.64187	100	3.88226	2.92519	5.72444
prpB2	CGbielefeld-CDS-genome-2	674129..675052		807	32.1526	22.0532	36.6168	1870	53.6925	52.7799	69.2141	1118	65.9742	47.6849	58.1279	2607	175.435	130.04	161.972	50	2.88182	1.69539	3.46408	64	4.07385	3.06955	3.66364
prpC2	CGbielefeld-CDS-genome-2	675081..676232		1766	56.4356	38.7087	80.1305	2442	56.2389	55.283	90.3855	2053	97.1719	70.234	106.741	4613	248.988	184.561	286.605	106	4.9003	2.88287	7.34386	124	6.33092	4.77019	7.0983
mdh2	CGbielefeld-CDS-genome-2	complement(676552..677595)		207	7.29936	5.00657	9.39242	343	8.7164	8.56826	12.6954	278	14.5194	10.4943	14.454	373	22.2154	16.4671	23.1744	59	3.00968	1.77061	4.08762	64	3.60559	2.71673	3.66364
cg0764	CGbielefeld-CDS-genome-2	complement(677688..678410)		353	17.9743	12.3284	16.017	399	14.6413	14.3924	14.7681	299	22.5495	16.2984	15.5458	246	21.1565	15.6822	15.2839	237	17.4574	10.2703	16.4198	267	21.7205	16.3659	15.2843
cg0765	CGbielefeld-CDS-genome-2	complement(678517..679221)		248	12.9502	8.88245	11.2528	421	15.843	15.5737	15.5824	205	15.8551	11.4598	10.6585	173	15.2582	11.3101	10.7485	191	14.4282	8.48821	13.2328	180	15.0169	11.3149	10.304
icd	CGbielefeld-CDS-genome-2	complement(679301..681517)		10686	177.445	121.708	484.867	13586	162.581	159.818	502.857	9448	232.369	167.952	491.228	7520	210.911	156.337	467.216	6791	163.131	95.971	470.492	8142	216.004	162.754	466.084
cg0767	CGbielefeld-CDS-genome-2	complement(681601..682500)		112	4.58132	3.14228	5.08189	182	5.36504	5.27385	6.73635	92	5.57378	4.02862	4.78333	75	5.18162	3.84086	4.65973	77	4.55636	2.68053	5.33469	131	8.56103	6.45053	7.49901
cg0768	CGbielefeld-CDS-genome-2	complement(682510..683319)		67	3.04512	2.08862	3.04006	170	5.56811	5.47347	6.29219	73	4.91408	3.5518	3.79547	65	4.98971	3.6986	4.03844	66	4.33939	2.55288	4.57259	71	5.1555	3.88454	4.06435
cg0769	CGbielefeld-CDS-genome-2	complement(683316..684344)		305	10.9119	7.48436	13.8391	393	10.1326	9.96038	14.5461	275	14.5721	10.5324	14.298	267	16.134	11.9593	16.5887	208	10.7651	6.33315	14.4106	382	21.8346	16.4519	21.8674
cg0770	CGbielefeld-CDS-genome-2	complement(684341..685336)		510	18.8506	12.9295	23.1408	786	20.9366	20.5808	29.0921	457	25.0185	18.0829	23.7607	406	25.3462	18.7878	25.2247	212	11.3356	6.66881	14.6877	456	26.9279	20.2895	26.1034
irp1	CGbielefeld-CDS-genome-2	complement(685346..686398)		963	33.6677	23.0923	43.6952	1576	39.7074	39.0325	58.3323	791	40.9593	29.6046	41.1263	749	44.2283	32.7841	46.5352	355	17.9543	10.5626	24.595	595	33.2343	25.0412	34.0604
cg0772	CGbielefeld-CDS-genome-2	686723..687856		2960	96.0935	65.9096	134.307	2938	68.7357	67.5675	108.744	1063	51.1122	36.9429	55.2683	788	43.2076	32.0275	48.9583	563	26.4402	15.5549	39.0056	579	30.0305	22.6273	33.1445
cg0773	CGbielefeld-CDS-genome-2	687863..688822		3955	151.667	104.027	179.454	3331	92.0549	90.4903	123.29	2646	150.287	108.625	137.573	2075	134.398	99.6223	128.919	1690	93.7529	55.1553	117.086	1921	117.694	88.6794	109.966
cg0774	CGbielefeld-CDS-genome-2	688824..689483		1073	59.8509	41.0512	48.6863	1269	51.0107	50.1437	46.9694	939	77.5757	56.0703	48.8212	727	68.4916	50.7692	45.1683	625	50.4319	29.6694	43.3011	535	47.6768	35.9233	30.6257
cg0775	CGbielefeld-CDS-genome-2	689620..689811		847	162.404	111.392	38.4318	1010	139.561	137.189	37.383	767	217.82	157.436	39.8784	547	177.147	131.309	33.985	615	170.586	100.357	42.6082	402	123.147	92.788	23.0122
cg0776	CGbielefeld-CDS-genome-2	complement(690386..691363)		584	21.9831	15.078	26.4984	857	23.248	22.8529	31.7201	409	22.8028	16.4814	21.265	234	14.8773	11.0277	14.5384	460	25.0489	14.7364	31.8696	284	17.0796	12.869	16.2574
cg0777	CGbielefeld-CDS-genome-2	complement(691387..692169)		356	16.738	11.4804	16.1532	396	13.4177	13.1896	14.6571	335	23.3285	16.8614	17.4176	206	16.3588	12.1259	12.7987	247	16.7998	9.88342	17.1126	158	11.8684	8.94256	9.04461
cg0778	CGbielefeld-CDS-genome-2	complement(692176..693195)		2627	94.8146	65.0324	119.198	2924	76.0538	74.7612	108.226	2004	107.128	77.4299	104.193	1876	114.361	84.77	116.555	1850	96.5919	56.8255	128.171	1899	109.502	82.5071	108.707
trpS	CGbielefeld-CDS-genome-2	693355..694392		1460	51.781	35.5161	66.2461	1618	41.3547	40.6518	59.8869	1354	71.1255	51.4082	70.3982	1099	65.8335	48.7989	68.2806	1150	59.0024	34.7114	79.6739	1802	102.107	76.935	103.154
cg0780	CGbielefeld-CDS-genome-2	694501..695586		529	17.9325	12.2997	24.0029	781	19.0794	18.7551	28.9071	593	29.7734	21.5197	30.8317	703	40.2506	29.8356	43.6772	875	42.9089	25.2435	60.6215	1432	77.5551	58.4359	81.974
cg0781	CGbielefeld-CDS-genome-2	695645..696550		812	32.9946	22.6307	36.8437	1368	40.0591	39.3783	50.6336	701	42.1885	30.493	36.4469	703	48.2474	35.7632	43.6772	794	46.6726	27.4577	55.0097	1245	80.8237	60.8987	71.2693
dac	CGbielefeld-CDS-genome-2	complement(696547..697857)		271	7.60995	5.21959	12.2964	400	8.0947	7.95712	14.8052	214	8.90052	6.43313	11.1264	253	11.9995	8.89462	15.7188	166	6.74334	3.96714	11.5008	361	16.1958	12.2031	20.6652
cg0783	CGbielefeld-CDS-genome-2	complement(698239..699468)		2309	69.1089	47.4011	104.769	2763	59.5963	58.5834	102.267	1640	72.7014	52.5472	85.2681	1160	58.6407	43.4673	72.0705	842	36.4566	21.4476	58.3352	812	38.8283	29.2562	46.4824
cg0784	CGbielefeld-CDS-genome-2	complement(699535..700395)		13	0.555847	0.38125	0.589862	27	0.831964	0.817823	0.999348	12	0.759945	0.549274	0.623913	6	0.433306	0.321187	0.372779	9	0.556684	0.3275	0.623535	13	0.88805	0.669125	0.744177
cg0785	CGbielefeld-CDS-genome-2	complement(700392..700655)		5	0.697238	0.478229	0.22687	5	0.50247	0.493929	0.185064	2	0.413076	0.298564	0.103986	2	0.471056	0.349169	0.12426	0	0	0	0	2	0.445578	0.335732	0.114489
upp	CGbielefeld-CDS-genome-2	700754..701389		2017	116.752	80.079	91.5194	2348	97.9455	96.2808	86.9063	1710	146.603	105.962	88.9076	1232	120.448	89.2818	76.5439	911	76.2835	44.878	63.1156	1198	110.789	83.4769	68.5788
cg0787	CGbielefeld-CDS-genome-2	701483..701857		654	64.2039	44.0369	29.6746	888	62.824	61.7562	32.8675	574	83.4612	60.3242	29.8438	485	80.4187	59.6101	30.1329	415	58.9368	34.6728	28.7519	577	90.4986	68.1885	33.03
pmmB	CGbielefeld-CDS-genome-2	complement(701854..703446)		983	22.7171	15.5814	44.6027	1448	24.1155	23.7056	53.5947	945	32.346	23.3791	49.1332	1124	43.873	32.5207	69.8339	1473	49.2443	28.9707	102.052	1708	63.0622	47.5159	97.7734
amiA	CGbielefeld-CDS-genome-2	703551..704738		2393	74.1552	50.8623	108.58	2695	60.1847	59.1618	99.7498	1764	80.963	58.5185	91.7152	1271	66.5236	49.3104	78.9669	1141	51.1492	30.0913	79.0504	1106	54.7565	41.2577	63.3123
lpdA	CGbielefeld-CDS-genome-2	704878..706287		4904	128.04	87.8216	222.514	6110	114.965	113.011	226.149	3759	145.364	105.066	195.441	3027	133.487	98.947	188.067	2593	97.9383	57.6176	179.647	3701	154.382	116.323	211.861
pyc	CGbielefeld-CDS-genome-2	706684..710106		6171	66.3688	45.5217	280.003	4997	38.7299	38.0716	184.953	5376	85.636	61.8961	279.513	5021	91.2074	67.6072	311.954	3515	54.6875	32.1729	243.525	4925	84.6246	63.7626	281.929
cg0792	CGbielefeld-CDS-genome-2	710312..711184		46	1.93981	1.3305	2.08721	31	0.942087	0.926075	1.1474	16	0.999332	0.722298	0.831884	29	2.06552	1.53106	1.80176	18	1.09806	0.645997	1.24707	25	1.68431	1.26909	1.43111
cg0793	CGbielefeld-CDS-genome-2	711266..711754		228	17.1649	11.7732	10.3453	316	17.1444	16.853	11.6961	133	14.8302	10.719	6.91504	134	17.0389	12.6301	8.32539	153	16.663	9.8029	10.6001	282	33.9186	25.5568	16.1429
cg0794	CGbielefeld-CDS-genome-2	complement(711990..713078)		57	1.92691	1.32165	2.58632	103	2.5093	2.46665	3.81233	46	2.30321	1.66472	2.39167	88	5.0246	3.72447	5.46742	34	1.66272	0.97819	2.35558	44	2.37641	1.79057	2.51875
cg0795	CGbielefeld-CDS-genome-2	713197..714123		57	2.26366	1.55262	2.58632	64	1.83166	1.80052	2.36883	35	2.0587	1.48799	1.81975	48	3.21965	2.38655	2.98223	59	3.38955	1.99409	4.08762	62	3.93377	2.964	3.54915
prpD1	CGbielefeld-CDS-genome-2	714211..715707		43	1.05745	0.725298	1.95108	77	1.36462	1.34143	2.84999	84	3.05958	2.21141	4.36739	45	1.86912	1.38548	2.79584	57	2.02779	1.19296	3.94906	62	2.43594	1.83543	3.54915
prpB1	CGbielefeld-CDS-genome-2	715704..716621		97	3.88995	2.66808	4.40128	110	3.17902	3.12499	4.07142	141	8.37492	6.05323	7.33098	166	11.2438	8.33441	10.3135	85	4.93112	2.901	5.88894	60	3.8442	2.89651	3.43466
prpC1	CGbielefeld-CDS-genome-2	716614..717759		137	4.401	3.0186	6.21624	215	4.97734	4.89275	7.95777	151	7.1845	5.19282	7.85091	163	8.84402	6.5556	10.1272	70	3.25299	1.91375	4.84972	91	4.6704	3.51903	5.20924
cg0799	CGbielefeld-CDS-genome-2	complement(717756..718133)		75	7.3044	5.01002	3.40305	75	5.26397	5.1745	2.77597	76	10.9629	7.92379	3.95145	48	7.8958	5.85274	2.98223	36	5.07201	2.98389	2.49414	34	5.29035	3.98615	1.94631
cg0800	CGbielefeld-CDS-genome-2	complement(718157..719482)		223	6.19122	4.2465	10.1184	348	6.96273	6.84439	12.8805	172	7.07276	5.11206	8.94275	171	8.01861	5.94377	10.6242	117	4.69907	2.76449	8.10596	148	6.56471	4.94635	8.47217
cg0801	CGbielefeld-CDS-genome-2	719644..719826		43	8.65033	5.93318	1.95108	78	11.308	11.1158	2.88701	27	8.04483	5.81465	1.4038	29	9.85357	7.30393	1.80176	7	2.03712	1.19845	0.484972	19	6.1066	4.60118	1.08764
accBC	CGbielefeld-CDS-genome-2	complement(720050..721825)		24739	512.807	351.73	1122.51	24714	369.185	362.91	914.737	20870	640.743	463.117	1085.09	17392	608.91	451.353	1080.56	16438	492.919	289.987	1138.85	18264	604.854	455.743	1045.51
thtR	CGbielefeld-CDS-genome-2	complement(722017..722922)		2225	90.4101	62.0114	100.957	2041	59.7666	58.7508	75.5433	2473	148.833	107.574	128.578	2633	180.705	133.947	163.588	2531	148.776	87.5258	175.352	3500	227.215	171.201	200.355
cg0806	CGbielefeld-CDS-genome-2	723250..724317		1670	57.5652	39.4835	75.7746	1623	40.3173	39.632	60.0719	1260	64.3285	46.4954	65.5109	1139	66.3131	49.1544	70.7658	926	46.1752	27.1651	64.1548	1160	63.8828	48.1342	66.4035
cg0807	CGbielefeld-CDS-genome-2	complement(724395..724811)		921	81.309	55.7691	41.7895	876	55.7329	54.7857	32.4233	725	94.7995	68.5193	37.6947	611	91.107	67.5328	37.9613	630	80.4589	47.3344	43.6475	832	117.35	88.4207	47.6273
wbpC	CGbielefeld-CDS-genome-2	724885..727035		1989	34.0416	23.3488	90.2489	2428	29.9469	29.4379	89.8673	1880	47.6564	34.4452	97.7464	1634	47.2344	35.0123	101.52	1304	32.2854	18.9937	90.3433	1601	43.7772	32.9851	91.6483
cg0809	CGbielefeld-CDS-genome-2	complement(727342..727935)		2253	139.634	95.7734	102.228	2953	131.893	129.651	109.299	1767	162.201	117.236	91.8712	1425	149.168	110.57	88.5349	1076	96.4706	56.7542	74.5471	1404	139.02	104.748	80.3711
cg0810	CGbielefeld-CDS-genome-2	complement(727940..728188)		1338	197.821	135.683	60.7104	1299	138.406	136.053	48.0798	1103	241.535	174.577	57.348	789	197.026	146.045	49.0204	659	140.947	82.9198	45.6566	949	224.163	168.902	54.3249
dtsR2	CGbielefeld-CDS-genome-2	complement(728212..729825)		10133	231.126	158.527	459.775	12927	212.49	208.878	478.466	9279	313.474	226.573	482.441	8038	309.664	229.538	499.399	5983	197.417	116.142	414.512	6798	247.728	186.657	389.147
dtsR1	CGbielefeld-CDS-genome-2	complement(730166..731797)		15532	350.366	240.313	704.749	17213	279.821	275.065	637.103	11810	394.579	285.194	614.034	10762	410.034	303.936	668.641	15758	514.222	302.519	1091.74	13318	479.972	361.648	762.381
birA	CGbielefeld-CDS-genome-2	731909..732775		346	14.6917	10.0769	15.6994	448	13.7089	13.4759	16.5818	242	15.2195	11.0004	12.5822	191	13.6981	10.1537	11.8668	167	10.2581	6.03489	11.57	231	15.6708	11.8075	13.2235
cg0815	CGbielefeld-CDS-genome-2	732785..733273		620	46.6765	32.015	28.1319	735	39.877	39.1992	27.2045	509	56.7562	41.0223	26.4643	529	67.2657	49.8605	32.8667	719	78.305	46.0672	49.8135	838	100.793	75.9455	47.9708
purK	CGbielefeld-CDS-genome-2	733294..734493		3101	95.134	65.2515	140.705	4179	92.3921	90.8218	154.677	2276	103.418	74.7484	118.336	1829	94.7718	70.2493	113.635	1479	65.6381	38.6153	102.468	1621	79.4509	59.8644	92.7931
kup	CGbielefeld-CDS-genome-2	734533..736419		851	16.6025	11.3875	38.6133	1155	16.2388	15.9628	42.7499	802	23.1743	16.7499	41.6982	571	18.8153	13.9468	35.4761	338	9.53925	5.61199	23.4172	291	9.07023	6.8342	16.6581
cg0819	CGbielefeld-CDS-genome-2	736457..736816		206	21.0659	14.4489	9.34705	250	18.4239	18.1107	9.25322	157	23.7794	17.1873	8.16286	135	23.3173	17.2839	8.38752	121	17.9	10.5306	8.38308	174	28.4279	21.4197	9.96052
purE	CGbielefeld-CDS-genome-2	736875..737372		588	43.4673	29.8138	26.6799	871	46.4016	45.6129	32.2382	509	55.7305	40.2809	26.4643	446	55.6868	41.2777	27.7099	494	52.8283	31.0792	34.2252	717	84.6812	63.8053	41.0442
cg0821	CGbielefeld-CDS-genome-2	737372..737827		333	26.884	18.4395	15.1096	556	32.3485	31.7987	20.5792	299	35.7528	25.8415	15.5458	263	35.8623	26.5828	16.3401	221	25.8105	15.1845	15.3113	248	31.9878	24.102	14.1966
cg0822	CGbielefeld-CDS-genome-2	737886..738680		484	22.4127	15.3726	21.961	564	18.8216	18.5017	20.8753	419	28.7376	20.771	21.785	418	32.6931	24.2336	25.9702	384	25.7237	15.1334	26.6042	402	29.741	22.4092	23.0122
ntaA	CGbielefeld-CDS-genome-2	complement(738686..740002)		134	3.74571	2.56915	6.08012	181	3.64617	3.58419	6.69933	129	5.34082	3.86025	6.70707	129	6.09047	4.51454	8.01474	83	3.35631	1.97453	5.75038	93	4.15331	3.12942	5.32373
tnp5a(ISCg5a)	CGbielefeld-CDS-genome-2	complement(740143..741645)		19	0.465382	0.319201	0.862106	18	0.317729	0.312329	0.666232	0	0	0	0	0	0	0	0	0	0	0	0	56	2.19142	1.65119	3.20569
cg0825	CGbielefeld-CDS-genome-2	complement(741698..742489)		66	3.06785	2.10421	2.99469	81	2.71334	2.66722	2.99804	36	2.47846	1.79138	1.87174	25	1.96273	1.45487	1.55324	31	2.08452	1.22633	2.14773	43	3.19331	2.40608	2.46151
cg0826	CGbielefeld-CDS-genome-2	742870..743241		709	70.1647	48.1253	32.1702	606	43.2189	42.4843	22.4298	655	96.0069	69.392	34.0553	488	81.5687	60.4625	30.3193	707	101.215	59.5454	48.9822	711	112.415	84.702	40.7008
cg0828	CGbielefeld-CDS-genome-2	complement(743288..743857)		288	18.6008	12.7581	13.0677	505	23.505	23.1055	18.6915	304	29.0806	21.0189	15.8058	251	27.3808	20.2959	15.5946	223	20.8353	12.2575	15.4498	220	22.701	17.1047	12.5938
cg0829	CGbielefeld-CDS-genome-2	743882..744304		108	9.39937	6.44694	4.90039	158	9.9097	9.74127	5.84804	73	9.40994	6.80132	3.79547	105	15.4346	11.4409	6.52363	72	9.06487	5.33291	4.98828	97	13.4874	10.1624	5.55271
cg0830	CGbielefeld-CDS-genome-2	complement(744301..744525)		62	10.1444	6.95792	2.81319	66	7.78225	7.64998	2.44285	58	14.0556	10.1591	3.01558	65	17.9629	13.315	4.03844	62	14.675	8.63339	4.29546	108	28.2318	21.272	6.18239
cg0831	CGbielefeld-CDS-genome-2	complement(744537..745373)		175	7.69711	5.27938	7.94045	267	8.4631	8.31926	9.88244	214	13.941	10.0763	11.1264	176	13.0748	9.69163	10.9348	118	7.50803	4.41701	8.17524	147	10.3297	7.78321	8.41492
cg0832	CGbielefeld-CDS-genome-2	complement(745370..746404)		261	9.28358	6.36752	11.8426	278	7.12604	7.00492	10.2896	271	14.2769	10.3191	14.09	196	11.775	8.72821	12.1774	171	8.79883	5.1764	11.8472	205	11.6496	8.77769	11.7351
cg0833	CGbielefeld-CDS-genome-2	complement(746516..746971)		33	2.66418	1.82734	1.49734	41	2.38541	2.34486	1.51753	25	2.98937	2.16066	1.29982	16	2.18173	1.6172	0.994076	22	2.56937	1.51158	1.5242	39	5.03034	3.79024	2.23253
cg0834	CGbielefeld-CDS-genome-2	complement(747092..748366)		368	10.6256	7.28799	16.6976	380	7.9071	7.77271	14.0649	524	22.4091	16.1969	27.2442	531	25.8959	19.1953	32.9909	346	14.4522	8.50233	23.9715	541	24.9565	18.8042	30.9692
msiK2	CGbielefeld-CDS-genome-2	complement(748501..749499)		1005	37.0353	25.4022	45.6009	974	25.8665	25.4268	36.0506	1213	66.2063	47.8527	63.0672	1333	82.9681	61.4999	82.819	516	27.5077	16.1829	35.7493	658	38.7398	29.1895	37.6668
cg0836	CGbielefeld-CDS-genome-2	749586..749918		108	11.9397	8.18935	4.90039	82	6.53301	6.42197	3.03506	441	72.2102	52.1922	22.9288	558	104.193	77.2324	34.6684	127	20.3109	11.949	8.79877	90	15.8963	11.9775	5.15199
cg0837	CGbielefeld-CDS-genome-2	749919..750290		25	2.47407	1.69694	1.13435	30	2.13955	2.10318	1.11039	732	107.293	77.5495	38.0587	709	118.509	87.8441	44.05	23	3.29272	1.93712	1.59348	30	4.74325	3.57392	1.71733
cg0838	CGbielefeld-CDS-genome-2	complement(750356..755158)		1211	9.28211	6.36651	54.9479	1238	6.83836	6.72213	45.822	25874	293.735	212.306	1345.26	26619	344.608	255.44	1653.83	605	6.7083	3.94652	41.9154	831	10.1762	7.66752	47.5701
cg0839	CGbielefeld-CDS-genome-2	complement(755167..758868)		1412	14.0415	9.63093	64.0681	1269	9.09429	8.93972	46.9694	30244	445.458	321.969	1572.47	29293	492.01	364.701	1819.97	612	8.80409	5.17949	42.4004	792	12.5831	9.48103	45.3376
cg0840	CGbielefeld-CDS-genome-2	complement(759100..759753)		320	18.0131	12.355	14.5197	381	15.4558	15.1931	14.1019	1903	158.659	114.676	98.9422	2071	196.901	145.953	128.671	260	21.1722	12.4557	18.0132	551	49.5531	37.3371	31.5417
cg0841	CGbielefeld-CDS-genome-2	complement(759834..762269)		841	12.7097	8.71744	38.1596	918	9.99791	9.82798	33.9778	12946	289.776	209.445	673.098	12781	326.238	241.823	794.081	392	8.56995	5.04174	27.1584	517	12.4828	9.40546	29.5953
cg0842	CGbielefeld-CDS-genome-2	complement(762376..764676)		187	2.99185	2.05208	8.48494	271	3.12461	3.07151	10.0305	191	4.52607	3.27136	9.93062	138	3.72914	2.76422	8.57391	179	4.14291	2.4373	12.4014	163	4.16647	3.13934	9.33083
cg0843	CGbielefeld-CDS-genome-2	complement(764707..771009)		595	3.47524	2.38363	26.9975	653	2.74859	2.70187	24.1694	609	5.26834	3.80786	31.6636	542	5.34686	3.96334	33.6743	570	4.81612	2.83335	39.4906	921	8.59428	6.47559	52.7221
cg0844	CGbielefeld-CDS-genome-2	complement(771017..775615)		997	7.98081	5.47396	45.2379	1002	5.78027	5.68202	37.0869	897	10.6349	7.6867	46.6375	870	11.7626	8.71897	54.0529	1062	12.2979	7.23491	73.5772	1537	19.6566	14.8108	87.9846
cg0845	CGbielefeld-CDS-genome-2	complement(775620..778508)		610	7.77316	5.33154	27.6782	673	6.18032	6.07528	24.9097	650	12.2679	8.867	33.7953	652	14.0329	10.4018	40.5086	720	13.2725	7.80831	49.8828	972	19.7886	14.9103	55.6415
cg0847	CGbielefeld-CDS-genome-2	complement(778628..780184)		2834	67.008	45.9601	128.59	3070	52.3111	51.422	113.63	2164	75.7832	54.7746	112.512	1529	61.0612	45.2614	94.9964	968	33.1098	19.4786	67.0647	696	26.2917	19.8101	39.8421
wbbL	CGbielefeld-CDS-genome-2	780442..781386		792	30.8538	21.1623	35.9362	1148	32.2295	31.6817	42.4908	648	37.3893	27.0243	33.6913	513	33.7545	25.0204	31.8726	311	17.5266	10.311	21.5466	615	38.2772	28.841	35.2053
rmlA2	CGbielefeld-CDS-genome-2	781559..782647		1823	61.6274	42.2697	82.7168	2282	55.5945	54.6495	84.4634	1500	75.1048	54.2843	77.9891	1409	80.4507	59.6338	87.5409	808	39.5142	23.2464	55.9796	1399	75.5592	56.932	80.0849
whiB2	CGbielefeld-CDS-genome-2	783037..783351		1745	203.939	139.88	79.1777	1619	136.358	134.04	59.9239	1952	337.889	244.219	101.49	2147	423.807	314.146	133.393	1992	336.781	198.13	138.009	3710	692.725	521.951	212.377
cg0851	CGbielefeld-CDS-genome-2	783492..783635		1	0.255654	0.175351	0.045374	0	0	0	0	0	0	0	0	2	0.863603	0.640143	0.12426	0	0	0	0	0	0	0	0
cg0852	CGbielefeld-CDS-genome-2	complement(783632..784090)		138	11.0683	7.59165	6.26162	103	5.95344	5.85226	3.81233	117	13.8988	10.0458	6.08315	196	26.5516	19.6813	12.1774	93	10.7905	6.34808	6.4432	330	42.2862	31.8616	18.8906
cg0853	CGbielefeld-CDS-genome-2	784185..784577		1287	120.559	82.6906	58.3964	1413	95.3879	93.7667	52.2992	1079	149.704	108.203	56.1002	1048	165.812	122.907	65.112	701	94.9937	55.8853	48.5665	1065	159.388	120.095	60.9653
pmmA	CGbielefeld-CDS-genome-2	784657..786033		8699	232.568	159.516	394.709	10614	204.498	201.022	392.855	7093	280.867	203.005	368.785	6184	279.243	206.988	384.211	5345	206.72	121.615	370.311	5981	255.468	192.489	342.379
cg0855	CGbielefeld-CDS-genome-2	786108..787115		1350	49.3047	33.8176	61.2549	1696	44.6384	43.8797	62.7739	1174	63.5056	45.9006	61.0395	1076	66.3741	49.1996	66.8516	762	40.2591	23.6846	52.7926	816	47.6132	35.8754	46.7114
manA	CGbielefeld-CDS-genome-2	787116..788300		1479	45.9478	31.5152	67.1082	2364	52.9265	52.0269	87.4985	1093	50.2928	36.3507	56.8281	874	45.8606	33.994	54.3014	456	20.4935	12.0564	31.5924	555	27.5468	20.7559	31.7706
cg0858	CGbielefeld-CDS-genome-2	complement(788640..789425)		668	31.2874	21.4597	30.3098	957	32.3023	31.7533	35.4213	636	44.1203	31.8893	33.0674	594	46.9905	34.8316	36.9051	582	39.4339	23.1992	40.3219	563	42.1292	31.7433	32.2286
cg0859	CGbielefeld-CDS-genome-2	789669..790022		938	97.5472	66.9067	42.5608	1307	97.9526	96.2878	48.3759	760	117.062	84.6099	39.5145	546	95.9038	71.0884	33.9229	694	104.406	61.4226	48.0815	901	149.699	112.795	51.5772
sahH	CGbielefeld-CDS-genome-2	790133..791569		6391	163.73	112.301	289.985	7069	130.51	128.292	261.644	7847	297.75	215.208	407.987	6934	300.036	222.401	430.808	3600	133.418	78.4906	249.414	4077	166.871	125.733	233.385
tmk	CGbielefeld-CDS-genome-2	791569..792180		1503	90.4113	62.0123	68.1972	1448	62.7713	61.7044	53.5947	1904	169.637	122.61	98.9942	1787	181.56	134.581	111.026	663	57.6941	33.9417	45.9338	811	77.9411	58.7268	46.4252
mtrA	CGbielefeld-CDS-genome-2	792205..792885		1807	97.6846	67.001	81.9909	1966	76.5914	75.2896	72.7674	2059	164.859	119.157	107.053	1847	168.642	125.006	114.754	1052	82.2693	48.3995	72.8843	1563	134.992	101.714	89.473
mtrB	CGbielefeld-CDS-genome-2	792985..794484		1408	34.5562	23.7018	63.8866	1468	25.9644	25.5231	54.3349	2065	75.0642	54.255	107.365	1751	72.5841	53.8027	108.789	1130	40.1196	23.6026	78.2883	1229	48.1901	36.3101	70.3534
cg0865	CGbielefeld-CDS-genome-2	794481..796187		1835	39.5747	27.1439	83.2613	2159	33.5554	32.9851	79.9108	1926	61.5215	44.4666	100.138	1739	63.3451	46.9543	108.044	1666	51.977	30.5783	115.423	1963	67.637	50.9628	112.371
cg0866	CGbielefeld-CDS-genome-2	796187..796777		167	10.4027	7.13508	7.57746	197	8.84347	8.69316	7.29154	226	20.8509	15.0706	11.7504	206	21.6734	16.0653	12.7987	215	19.374	11.3979	14.8956	225	22.392	16.8718	12.88
cg0867	CGbielefeld-CDS-genome-2	796921..797586		2569	142.005	97.4002	116.566	3157	125.76	123.623	116.85	3966	324.7	234.687	206.203	3872	361.5	267.96	240.567	4430	354.241	208.402	306.918	6594	582.334	438.775	377.469
secA	CGbielefeld-CDS-genome-2	797723..800260		10582	153.494	105.28	480.148	12567	131.366	129.133	465.141	8732	187.597	135.592	454.001	6889	168.776	125.105	428.012	6846	143.653	84.5118	474.302	8039	186.298	140.371	460.188
cg0869	CGbielefeld-CDS-genome-2	complement(800257..800640)		222	21.2832	14.5979	10.073	229	15.8215	15.5526	8.47595	108	15.3355	11.0842	5.61522	93	15.0591	11.1625	5.77807	107	14.8396	8.73021	7.41314	121	18.5332	13.9644	6.92657
cg0870	CGbielefeld-CDS-genome-2	800757..801167		2477	221.87	152.179	112.391	1964	126.778	124.623	72.6933	1830	242.78	175.477	95.1467	1493	225.873	167.428	92.7598	1393	180.501	106.189	96.5094	2043	292.364	220.289	116.95
cg0871	CGbielefeld-CDS-genome-2	801170..801676		1298	94.2501	64.6453	58.8955	1687	88.2777	86.7773	62.4408	882	94.856	68.5601	45.8576	705	86.4625	64.0901	43.8015	482	50.6301	29.7859	33.3938	517	59.9763	45.1907	29.5953
cg0872	CGbielefeld-CDS-genome-2	complement(801678..802667)		1881	69.9469	47.976	85.3485	2268	60.7787	59.7457	83.9453	1430	78.7599	56.9261	74.3496	1385	86.9884	64.4799	86.0497	1212	65.1984	38.3565	83.9694	1591	94.5219	71.22	91.0758
aroA	CGbielefeld-CDS-genome-2	complement(802660..803952)		2063	58.7376	40.2875	93.6066	2479	50.8653	50.0008	91.755	1721	72.5749	52.4558	89.4795	1441	69.2966	51.3659	89.529	1207	49.7139	29.247	83.623	1713	77.9213	58.7118	98.0596
cg0874	CGbielefeld-CDS-genome-2	803963..804604		199	11.4112	7.82687	9.02943	309	12.7693	12.5523	11.437	186	15.7973	11.418	9.67065	204	19.7579	14.6455	12.6745	214	17.752	10.4436	14.8263	307	28.1255	21.1919	17.574
cg0875	CGbielefeld-CDS-genome-2	complement(804601..805713)		166	5.4907	3.76602	7.53209	249	5.93537	5.83449	9.21621	191	9.35712	6.76315	9.93062	177	9.88837	7.32972	10.997	143	6.84243	4.02544	9.90728	182	9.61775	7.24675	10.4185
sigH	CGbielefeld-CDS-genome-2	805881..806501		1567	92.895	63.7158	71.1011	1725	73.6955	72.443	63.8472	2501	219.597	158.721	130.034	2241	224.387	166.326	139.233	1081	92.7051	54.5389	74.8935	1459	138.185	104.119	83.5196
cg0877	CGbielefeld-CDS-genome-2	806504..806773		811	110.579	75.845	36.7983	861	84.6025	83.1645	31.8681	1224	247.185	178.661	63.6391	979	225.458	167.12	60.8251	774	152.667	89.8151	53.624	647	140.941	106.196	37.0371
whiB1	CGbielefeld-CDS-genome-2	complement(807005..807265)		1447	204.1	139.99	65.6562	1091	110.899	109.014	40.3811	1214	253.619	183.311	63.1192	1780	424.059	314.332	110.591	836	170.583	100.355	57.9195	2587	582.979	439.261	148.091
cg0879	CGbielefeld-CDS-genome-2	807791..808213		120	10.4437	7.16326	5.44488	198	12.4185	12.2074	7.32855	81	10.4412	7.54667	4.21141	109	16.0226	11.8767	6.77215	61	7.67996	4.51816	4.22618	50	6.95228	5.23837	2.86222
cg0880	CGbielefeld-CDS-genome-2	complement(808210..809412)		875	26.7767	18.3659	39.7023	1079	23.7958	23.3913	39.9369	759	34.4017	24.8649	39.4625	675	34.8887	25.8611	41.9376	662	29.3064	17.2411	45.8645	589	28.797	21.6978	33.7169
rhlE	CGbielefeld-CDS-genome-2	complement(809416..810690)		1423	41.0875	28.1815	64.5672	1915	39.8476	39.1703	70.8797	1401	59.9145	43.3051	72.8419	1309	63.8375	47.3194	81.3279	943	39.3886	23.1725	65.3326	1094	50.4666	38.0254	62.6254
cg0882	CGbielefeld-CDS-genome-2	810759..810986		360	58.1277	39.8692	16.3346	444	51.6645	50.7863	16.4337	323	77.2453	55.8314	16.7937	272	74.179	54.9849	16.8993	277	64.7015	38.0642	19.191	347	89.5142	67.4468	19.8638
cg0883	CGbielefeld-CDS-genome-2	811001..811870		1522	64.4037	44.1739	69.0593	1509	46.0165	45.2344	55.8525	1430	89.6233	64.778	74.3496	1277	91.2679	67.6521	79.3397	1206	73.824	43.431	83.5537	1298	87.7511	66.1184	74.3032
cg0884	CGbielefeld-CDS-genome-2	811878..812639		1167	56.3808	38.671	52.9515	1337	46.5501	45.7589	49.4862	1118	80.0002	57.8226	58.1279	891	72.7059	53.893	55.3576	720	50.3207	29.6039	49.8828	880	67.9243	51.1793	50.3751
cg0885	CGbielefeld-CDS-genome-2	812643..815693		1263	15.2397	10.4528	57.3074	1160	10.0869	9.9155	42.935	29179	521.474	376.911	1517.1	35251	718.416	532.523	2190.14	589	10.2812	6.04846	40.8069	1112	21.4368	16.1521	63.6558
cg0886	CGbielefeld-CDS-genome-2	815686..818898		1056	12.0995	8.29895	47.915	1043	8.61226	8.46589	38.6045	23467	398.246	287.844	1220.11	26414	511.176	378.907	1641.1	499	8.27102	4.86589	34.5716	810	14.8276	11.1723	46.368
cg0887	CGbielefeld-CDS-genome-2	818938..819999		917	31.7878	21.8029	41.608	920	22.983	22.5924	34.0519	5022	257.844	186.364	261.108	5442	318.626	236.18	338.11	550	27.5808	16.226	38.1049	710	39.3216	29.6279	40.6435
cg0888	CGbielefeld-CDS-genome-2	819996..820712		508	26.0831	17.8902	23.05	615	22.7562	22.3694	22.7629	2279	173.312	125.267	118.491	2636	228.598	169.448	163.774	340	25.2539	14.857	23.5558	521	42.7382	32.2022	29.8243
cg0889	CGbielefeld-CDS-genome-2	820727..822763		1006	18.1812	12.4703	45.6463	1259	16.3975	16.1188	46.5992	3510	93.9551	67.909	182.495	3836	117.094	86.7955	238.33	655	17.1246	10.0745	45.3795	825	23.821	17.9486	47.2266
cg0890	CGbielefeld-CDS-genome-2	complement(822760..823560)		101	4.64199	3.1839	4.58278	181	5.99501	5.89311	6.69933	316	21.5109	15.5477	16.4297	315	24.4526	18.1254	19.5709	75	4.98653	2.9336	5.19613	121	8.88485	6.69452	6.92657
cg0891	CGbielefeld-CDS-genome-2	823657..824145		44	3.31252	2.27203	1.99646	143	7.75838	7.62651	5.29284	26	2.89914	2.09544	1.35181	22	2.79744	2.07359	1.36686	22	2.39598	1.40957	1.5242	21	2.52585	1.90317	1.20213
cg0892	CGbielefeld-CDS-genome-2	complement(824150..825598)		1056	26.8294	18.402	47.915	1408	25.7797	25.3415	52.1142	933	35.1089	25.3761	48.5092	844	36.2177	26.8462	52.4375	1353	49.7277	29.2551	93.7381	1639	66.5285	50.1276	93.8235
cg0893	CGbielefeld-CDS-genome-2	825663..826715		1525	53.3159	36.5689	69.1954	1910	48.1226	47.3046	70.6946	959	49.6586	35.8923	49.8611	698	41.2167	30.5518	43.3666	618	31.2557	18.3879	42.8161	784	43.791	32.9955	44.8796
cg0894	CGbielefeld-CDS-genome-2	complement(826712..827389)		1378	74.8229	51.3203	62.5254	1434	56.113	55.1592	53.0765	1027	82.5933	59.6969	53.3966	830	76.1193	56.4232	51.5677	850	66.7665	39.2791	58.8894	1089	94.4703	71.1811	62.3391
cg0895	CGbielefeld-CDS-genome-2	complement(827466..827990)		555	38.9178	26.6934	25.1826	582	29.4108	28.911	21.5415	389	40.4012	29.2012	20.2252	274	32.4517	24.0547	17.0236	362	36.7214	21.6034	25.08	453	50.75	38.2389	25.9317
cg0896	CGbielefeld-CDS-genome-2	828089..831046		13273	165.191	113.303	602.249	12586	112.884	110.966	465.844	10409	191.874	138.683	541.193	8100	170.268	126.211	503.251	10973	197.559	116.225	760.228	9680	192.475	145.025	554.126
pdxR	CGbielefeld-CDS-genome-2	complement(831097..832458)		237	6.40599	4.39381	10.7536	243	4.7334	4.65295	8.99413	117	4.68396	3.38548	6.08315	125	5.70663	4.23002	7.76622	125	4.88767	2.87544	8.66021	149	6.43438	4.84815	8.52941
cg0898	CGbielefeld-CDS-genome-2	832548..833447		640	26.179	17.9559	29.0394	734	21.637	21.2693	27.1675	520	31.504	22.7705	27.0362	519	35.8568	26.5787	32.2454	353	20.8882	12.2887	24.4564	674	44.0468	33.1882	38.5827
cg0899	CGbielefeld-CDS-genome-2	833444..834046		343	20.9407	14.3631	15.5633	312	13.7272	13.4939	11.548	285	25.771	18.6268	14.8179	338	34.8535	25.835	20.9999	206	18.1936	10.7034	14.272	346	33.7486	25.4288	19.8066
tRNA_3547	CGbielefeld-CDS-genome-2	834140..834216		0	0	0	0	0	0	0	0	0	0	0	0	0	0	0	0	0	0	0	0	0	0	0	0
cg0900	CGbielefeld-CDS-genome-2	complement(834265..834630)		88	8.8515	6.07116	3.99291	119	8.626	8.47939	4.40453	85	12.6632	9.15269	4.41938	36	6.11601	4.53347	2.23667	43	6.25686	3.68095	2.97911	59	9.48131	7.14394	3.37742
cg0901	CGbielefeld-CDS-genome-2	835045..836109		1813	62.6705	42.9851	82.2631	2043	50.8935	50.0285	75.6174	1766	90.416	65.351	91.8192	1633	95.3418	70.6718	101.458	1288	64.4074	37.8912	89.2348	1637	90.4058	68.1186	93.7091
cg0902	CGbielefeld-CDS-genome-2	836391..836864		16	1.24267	0.852338	0.725984	38	2.12691	2.09076	1.40649	13	1.49544	1.08088	0.675906	13	1.70534	1.26408	0.807687	5	0.561773	0.330494	0.346408	10	1.24085	0.93495	0.572444
cg0903	CGbielefeld-CDS-genome-2	836858..837313		46	3.71371	2.5472	2.08721	59	3.43266	3.37432	2.18376	29	3.46767	2.50636	1.50779	20	2.72717	2.0215	1.2426	26	3.03653	1.78641	1.80132	23	2.96661	2.23527	1.31662
cg0904	CGbielefeld-CDS-genome-2	837563..837724		0	0	0	0	6	0.982607	0.965906	0.222077	1	0.336581	0.243274	0.0519928	2	0.767647	0.569016	0.12426	1	0.328741	0.1934	0.0692817	2	0.726127	0.547119	0.114489
psp2	CGbielefeld-CDS-genome-2	838785..840368		359	8.34362	5.72281	16.2893	831	13.9184	13.6818	30.7577	296	10.1892	7.36457	15.3899	178	6.98733	5.17934	11.0591	177	5.95097	3.50098	12.2629	279	10.3597	7.80577	15.9712
cg0906	CGbielefeld-CDS-genome-2	840398..840829		418	35.6211	24.4322	18.9663	809	49.6831	48.8386	29.9434	562	70.9344	51.27	29.2199	491	70.6715	52.385	30.5057	575	70.8849	41.7019	39.837	729	99.2524	74.7843	41.7312
cg0907	CGbielefeld-CDS-genome-2	840792..841106		74	8.64841	5.93186	3.35768	178	14.9918	14.737	6.5883	92	15.9251	11.5103	4.78333	92	18.1603	13.4613	5.71594	64	10.8203	6.36563	4.43403	116	21.6593	16.3198	6.64035
cg0908	CGbielefeld-CDS-genome-2	841103..841615		366	26.2651	18.015	16.6069	705	36.4599	35.8402	26.0941	295	31.3551	22.6629	15.3379	236	28.605	21.2033	14.6626	170	17.6482	10.3825	11.7779	199	22.8157	17.1911	11.3916
cg0909	CGbielefeld-CDS-genome-2	complement(841907..842077)		14	3.01403	2.06729	0.635236	16	2.48238	2.44018	0.592206	9	2.86979	2.07423	0.467935	4	1.45449	1.07814	0.248519	10	3.11439	1.83221	0.692817	4	1.37582	1.03665	0.228978
cg0910	CGbielefeld-CDS-genome-2	complement(842987..843769)		1043	49.0386	33.6351	47.3251	961	32.5616	32.0081	35.5694	839	58.4258	42.229	43.6219	824	65.4353	48.5037	51.1949	678	46.1145	27.1294	46.973	1002	75.2668	56.7117	57.3589
cg0911	CGbielefeld-CDS-genome-2	complement(843776..844651)		486	20.4243	14.0088	22.0518	504	15.2641	15.0046	18.6545	410	25.5202	18.4455	21.317	406	28.8183	21.3615	25.2247	435	26.4457	15.5581	30.1375	665	44.6493	33.6422	38.0675
prfB	CGbielefeld-CDS-genome-2	844730..845836		3281	109.112	74.8391	148.872	3646	87.3801	85.895	134.949	2460	121.169	87.5787	127.902	2185	122.73	90.9732	135.754	1740	83.7088	49.2463	120.55	1865	99.0897	74.6617	106.761
ftsE	CGbielefeld-CDS-genome-2	845968..846657		1878	100.199	68.7253	85.2124	2087	80.2448	78.881	77.2459	1249	98.7001	71.3386	64.939	863	77.7693	57.6463	53.618	617	47.6218	28.0161	42.7468	457	38.9551	29.3517	26.1607
ftsX	CGbielefeld-CDS-genome-2	846671..847573		1101	44.8864	30.7872	49.9568	1461	42.9246	42.195	54.0758	733	44.2609	31.991	38.1107	455	31.3307	23.2238	28.269	311	18.3418	10.7906	21.5466	240	15.6322	11.7785	13.7387
smpB	CGbielefeld-CDS-genome-2	847610..848104		1356	100.849	69.1711	61.5272	2355	126.22	124.075	87.1654	1281	141.107	101.989	66.6027	952	119.585	88.6423	59.1476	768	82.6276	48.6103	53.2083	793	94.2248	70.9961	45.3948
cg0918	CGbielefeld-CDS-genome-2	848105..848458		989	102.851	70.5445	44.8749	885	66.326	65.1987	32.7564	733	112.903	81.604	38.1107	678	119.089	88.2746	42.124	519	78.0789	45.9342	35.9572	521	86.5629	65.2231	29.8243
ssrA	CGbielefeld-CDS-genome-2	848547..848922		7121944	697310	478278	323151	4292786	302897	297749	158888	4446985	644885	466110	231211	3814461	630800	467579	236992	8133709	1.15205e+06	677755	563517	3586135	560965	422674	205286
tnp18a(ISCg18a)	CGbielefeld-CDS-genome-2	849198..849500		132	16.0379	11.0002	5.98937	111	9.71906	9.55387	4.10843	94	16.9157	12.2263	4.88732	96	19.7004	14.6029	5.96446	122	21.4431	12.6151	8.45237	178	34.5521	26.0342	10.1895
tRNA_3548	CGbielefeld-CDS-genome-2	849823..849899		0	0	0	0	0	0	0	0	0	0	0	0	0	0	0	0	0	0	0	0	0	0	0	0
cg0921	CGbielefeld-CDS-genome-2	complement(849967..850794)		147	6.53585	4.48288	6.66998	167	5.35094	5.25999	6.18115	85	5.59748	4.04575	4.41938	119	8.93641	6.62409	7.39344	62	3.98778	2.34603	4.29546	139	9.87374	7.43963	7.95697
cg0922	CGbielefeld-CDS-genome-2	complement(850794..851714)		121	4.83661	3.31738	5.49026	157	4.52255	4.44569	5.81102	97	5.7427	4.15072	5.0433	87	5.87363	4.35381	5.40529	79	4.56811	2.68744	5.47325	109	6.96088	5.24486	6.23964
cg0923	CGbielefeld-CDS-genome-2	complement(851879..852469)		1402	87.3325	59.9005	63.6144	1924	86.3697	84.9017	71.2128	987	91.0613	65.8174	51.3168	726	76.3828	56.6185	45.1062	996	89.7514	52.8012	69.0046	848	84.3929	63.588	48.5432
cg0924	CGbielefeld-CDS-genome-2	852821..853837		3056	110.624	75.8756	138.663	4292	111.965	110.062	158.859	2177	116.719	84.3623	113.188	1532	93.6665	69.43	95.1828	627	32.8334	19.3161	43.4396	1354	78.306	59.0017	77.5089
cg0926	CGbielefeld-CDS-genome-2	854088..855089		1991	73.1507	50.1734	90.3397	2623	69.4503	68.2699	97.0848	1480	80.5375	58.211	76.9493	1010	62.6759	46.4583	62.7511	742	39.4372	23.2011	51.407	961	56.4096	42.5033	55.0119
cg0927	CGbielefeld-CDS-genome-2	855076..856197		2003	65.7209	45.0773	90.8842	2310	54.6214	53.693	85.4998	1589	77.221	55.8138	82.6165	1268	70.2705	52.0878	78.7806	1151	54.6326	32.1406	79.7432	1431	75.0143	56.5215	81.9167
cg0928	CGbielefeld-CDS-genome-2	856194..856949		1247	60.7239	41.65	56.5814	1622	56.921	55.9536	60.0349	934	67.3642	48.6896	48.5612	846	69.5817	51.5772	52.5618	760	53.5379	31.4966	52.6541	1016	79.0441	59.5578	58.1603
16S rRNA copy B	CGbielefeld-CDS-genome-2	857589..859113		223	5.38332	3.69237	10.1184	3627	63.0988	62.0264	134.246	136	4.86265	3.51463	7.07101	324	13.2106	9.7923	20.13	51	1.78102	1.04779	3.53337	259	9.98912	7.52656	14.8263
23S rRNA copy B	CGbielefeld-CDS-genome-2	859504..862583		852972	10195.3	6992.85	38702.8	4787024	41234.3	40533.5	177182	624182	11050.1	7986.78	32452.9	664360	13412.2	9941.74	41276.5	590112	10203.6	6002.83	40884	965121	18430.1	13886.7	55247.8
5S rRNA copy B	CGbielefeld-CDS-genome-2	862694..862813		0	0	0	0	0	0	0	0	3	1.36315	0.98526	0.155978	0	0	0	0	0	0	0	0	0	0	0	0
cg0931	CGbielefeld-CDS-genome-2	863063..864226		101	3.19436	2.19098	4.58278	359	8.18248	8.04341	13.2876	45	2.10797	1.5236	2.33967	60	3.20512	2.37579	3.72779	41	1.87586	1.10358	2.84055	70	3.53706	2.66509	4.00711
cg0932	CGbielefeld-CDS-genome-2	complement(864221..864862)		1338	76.7249	52.6249	60.7104	1459	60.2926	59.2678	54.0018	878	74.5699	53.8977	45.6496	715	69.2497	51.3311	44.4228	601	49.855	29.33	41.6383	736	67.428	50.8054	42.1319
cg0933	CGbielefeld-CDS-genome-2	complement(864864..866537)		2227	48.9756	33.5919	101.048	2479	39.2884	38.6207	91.755	1651	53.7769	38.8689	85.84	1282	47.6189	35.2973	79.6504	938	29.8412	17.5558	64.9862	1275	44.7973	33.7537	72.9866
cg0934	CGbielefeld-CDS-genome-2	complement(866587..868788)		704	11.7698	8.07282	31.9433	837	10.0844	9.91304	30.9798	606	15.0058	10.8459	31.5076	564	15.9261	11.8051	35.0412	605	14.6321	8.60816	41.9154	697	18.6171	14.0276	39.8993
cg0935	CGbielefeld-CDS-genome-2	868824..869045		149	24.7086	16.9474	6.76073	437	52.2242	51.3366	16.1746	194	47.6489	34.4397	10.0866	130	36.4114	26.9898	8.07687	97	23.2696	13.6896	6.72032	81	21.46	16.1696	4.6368
cg0936	CGbielefeld-CDS-genome-2	complement(869271..869852)		3173	200.707	137.663	143.972	3777	172.174	169.248	139.798	2423	227.005	164.075	125.978	1381	147.543	109.365	85.8012	548	50.1449	29.5005	37.9664	1001	101.16	76.2216	57.3016
cg0938	CGbielefeld-CDS-genome-2	870409..870792		4035	386.837	265.328	183.084	2498	172.586	169.652	92.4582	2403	341.214	246.623	124.939	2382	385.707	285.904	147.993	1910	264.894	155.838	132.328	2157	330.382	248.935	123.476
cg0939	CGbielefeld-CDS-genome-2	complement(870847..871374)		1089	75.9292	52.0792	49.4123	1339	67.2807	66.1371	49.5603	1006	103.889	75.0888	52.3047	789	92.9158	68.8736	49.0204	1344	135.561	79.7512	93.1146	896	99.8094	75.204	51.291
cg0940	CGbielefeld-CDS-genome-2	complement(871386..872162)		378	17.9096	12.284	17.1514	620	21.1697	20.8099	22.948	370	25.9648	18.7669	19.2373	259	20.7265	15.3634	16.0916	270	18.506	10.8872	18.7061	282	21.3464	16.084	16.1429
cg0941	CGbielefeld-CDS-genome-2	complement(872189..872890)		460	24.1233	16.5459	20.8721	835	31.5568	31.0205	30.9058	347	26.9523	19.4806	18.0415	208	18.4235	13.6564	12.923	308	23.3659	13.7463	21.3388	372	31.1676	23.484	21.2949
cg0944	CGbielefeld-CDS-genome-2	873224..874684		8260	208.135	142.758	374.789	8484	154.062	151.443	314.017	7719	288.081	208.22	401.332	6607	281.191	208.432	410.491	5295	193.012	113.55	366.847	4581	184.42	138.956	262.237
cg0945	CGbielefeld-CDS-genome-2	874684..875514		3293	145.883	100.06	149.417	3161	100.918	99.2024	116.998	2905	190.612	137.77	151.039	2350	175.838	130.34	146.005	2143	137.338	80.7966	148.471	2266	160.382	120.844	129.716
cg0946	CGbielefeld-CDS-genome-2	complement(875537..876415)		435	18.2186	12.496	19.7377	526	15.876	15.6061	19.4688	347	21.5251	15.5579	18.0415	257	18.1799	13.4758	15.9674	212	12.8445	7.55647	14.6877	372	24.8915	18.7552	21.2949
cg0947	CGbielefeld-CDS-genome-2	complement(876419..877354)		821	32.2911	22.1481	37.2521	1328	37.6414	37.0016	49.1531	700	40.778	29.4736	36.3949	550	36.537	27.083	34.1714	540	30.7247	18.0755	37.4121	912	57.3081	43.1803	52.2069
serC	CGbielefeld-CDS-genome-2	complement(877453..878583)		11507	374.554	256.903	522.119	13034	305.745	300.548	482.426	8537	411.573	297.477	443.862	5630	309.523	229.433	349.791	5425	255.45	150.283	375.853	5427	282.224	212.649	310.665
gltA	CGbielefeld-CDS-genome-2	879309..880622		7535	211.107	144.796	341.893	9310	187.974	184.779	344.59	6876	285.328	206.23	357.502	4762	225.341	167.033	295.862	3850	156.04	91.7989	266.734	4871	218.032	164.282	278.837
fkpA	CGbielefeld-CDS-genome-2	880747..881103		13273	1368.72	938.795	602.249	16903	1256.14	1234.79	625.629	12641	1930.71	1395.48	657.24	8067	1405.05	1041.49	501.201	13499	2013.74	1184.69	935.233	5385	887.186	668.474	308.261
accDA	CGbielefeld-CDS-genome-2	complement(881110..882564)		1136	28.7429	19.7145	51.5449	1280	23.3395	22.9428	47.3765	1005	37.6623	27.2216	52.2527	818	34.9572	25.9119	50.8222	647	23.6816	13.932	44.8253	903	36.5025	27.5037	51.6917
cg0952	CGbielefeld-CDS-genome-2	883118..883459		722	77.7188	53.3066	32.76	704	54.6123	53.6841	26.0571	946	150.824	109.012	49.1851	648	117.814	87.329	40.2601	520	80.9742	47.6375	36.0265	444	76.3579	57.5339	25.4165
cg0953	CGbielefeld-CDS-genome-2	883466..885121		6868	152.681	104.722	311.629	5104	81.77	80.3802	188.914	8256	271.84	196.481	429.252	6827	256.34	190.011	424.16	5201	167.261	98.4008	360.334	5233	185.861	140.042	299.56
cg0954	CGbielefeld-CDS-genome-2	885203..886015		345	15.6223	10.7152	15.654	512	16.7079	16.424	18.9506	299	20.0533	14.4941	15.5458	257	19.6557	14.5697	15.9674	198	12.9701	7.63039	13.7178	314	22.7162	17.1161	17.9747
cg0955	CGbielefeld-CDS-genome-2	complement(886017..886859)		1154	50.3957	34.5659	52.3616	1159	36.4754	35.8554	42.8979	724	46.829	33.8471	37.6428	756	55.7623	41.3336	46.9701	461	29.1234	17.1335	31.9389	682	47.5833	35.8528	39.0407
fas-IB	CGbielefeld-CDS-genome-2	887143..896052		24565	101.497	69.616	1114.61	26462	78.7932	77.454	979.435	16907	103.465	74.7825	879.042	13346	93.1365	69.0372	829.184	22057	131.837	77.5605	1528.15	33406	220.518	166.155	1912.31
cg0958	CGbielefeld-CDS-genome-2	896174..896665		245	18.3323	12.5739	11.1166	426	22.9714	22.581	15.7675	206	22.83	16.5011	10.7105	173	21.8639	16.2065	10.7485	106	11.4739	6.75014	7.34386	227	27.1368	20.4469	12.9945
cg0960	CGbielefeld-CDS-genome-2	896879..897067		17	3.31133	2.27121	0.771358	24	3.36894	3.31168	0.88831	17	4.90446	3.54485	0.883877	23	7.56681	5.60887	1.42898	11	3.09956	1.82349	0.762099	16	4.97915	3.75167	0.91591
cg0961	CGbielefeld-CDS-genome-2	complement(897064..898113)		251	8.80034	6.03607	11.3889	323	8.16125	8.02254	11.9552	336	17.4483	12.6113	17.4696	236	13.9756	10.3593	14.6626	128	6.49217	3.81938	8.86806	162	9.07451	6.83742	9.27359
cg0962	CGbielefeld-CDS-genome-2	complement(898187..898615)		47	4.03326	2.76637	2.13258	91	5.62766	5.53201	3.36817	35	4.44851	3.2153	1.81975	41	5.94255	4.4049	2.54732	29	3.60006	2.11794	2.00917	32	4.38723	3.30567	1.83182
tRNA_3549	CGbielefeld-CDS-genome-2	complement(898698..898773)		0	0	0	0	0	0	0	0	0	0	0	0	0	0	0	0	0	0	0	0	0	0	0	0
cg0963	CGbielefeld-CDS-genome-2	898894..899163		552	75.2645	51.6232	25.0465	742	72.9095	71.6703	27.4636	766	154.692	111.809	39.8265	568	130.807	96.9603	35.2897	892	175.942	103.508	61.7993	783	170.567	128.518	44.8224
cg0964	CGbielefeld-CDS-genome-2	complement(899195..899434)		513	78.6903	53.9729	23.2769	826	91.3088	89.7569	30.5727	402	91.3312	66.0124	20.9011	339	87.8284	65.1025	21.062	351	77.887	45.8214	24.3179	426	104.399	78.662	24.3861
folA	CGbielefeld-CDS-genome-2	complement(899447..899905)		1237	99.2138	68.0498	56.1277	1428	82.539	81.1361	52.8544	973	115.586	83.5432	50.589	860	116.502	86.3565	53.4316	727	84.3512	49.6242	50.3678	622	79.7031	60.0543	35.606
thyA	CGbielefeld-CDS-genome-2	complement(899902..900702)		2459	113.016	77.5168	111.575	3751	124.239	122.127	138.835	2101	143.02	103.372	109.237	1584	122.962	91.1449	98.4136	1487	98.8662	58.1635	103.022	1173	86.1317	64.8981	67.1477
cysQ	CGbielefeld-CDS-genome-2	complement(900721..901479)		1822	88.3734	60.6145	82.6715	2769	96.7888	95.1437	102.489	1809	129.957	93.9307	94.0549	1851	151.639	112.402	115.002	1912	134.158	78.9256	132.467	2215	171.644	129.33	126.796
cg0968	CGbielefeld-CDS-genome-2	901514..906076		1456	11.747	8.05714	66.0646	1613	9.37838	9.21898	59.7018	1227	14.6622	10.5975	63.7951	1206	16.434	12.1817	74.9285	1307	15.2544	8.97423	90.5512	1473	18.9867	14.306	84.321
nei	CGbielefeld-CDS-genome-2	906086..906856		856	40.8728	28.0343	38.8402	809	27.838	27.3648	29.9434	633	44.7665	32.3564	32.9114	533	42.9853	31.8627	33.1152	514	35.5041	20.8872	35.6108	582	44.3983	33.453	33.3162
cg0970	CGbielefeld-CDS-genome-2	906860..907270		694	62.1631	42.6371	31.4896	671	43.3136	42.5774	24.8357	545	72.3034	52.2595	28.3361	443	67.0206	49.6788	27.5235	463	59.9941	35.2948	32.0774	482	68.9767	51.9723	27.5918
cg0971	CGbielefeld-CDS-genome-2	complement(907260..907862)		414	25.2754	17.3362	18.7848	564	24.8145	24.3927	20.8753	294	26.5849	19.215	15.2859	254	26.1917	19.4145	15.781	200	17.6637	10.3917	13.8563	181	17.6546	13.3023	10.3612
cg0972	CGbielefeld-CDS-genome-2	complement(908027..909202)		254	7.95136	5.45376	11.525	345	7.78315	7.65087	12.7694	240	11.1278	8.04294	12.4783	270	14.2759	10.582	16.775	267	12.0913	7.11338	18.4982	282	14.1039	10.6269	16.1429
pgi	CGbielefeld-CDS-genome-2	complement(909227..910849)		1267	28.7391	19.7119	57.4889	1291	21.1034	20.7447	47.7837	1549	52.04	37.6135	80.5368	1882	72.1021	53.4454	116.928	2326	76.3239	44.9017	161.149	3410	123.576	93.1113	195.203
cg0974	CGbielefeld-CDS-genome-2	complement(910989..912167)		63	1.96717	1.34926	2.85856	112	2.52028	2.47744	4.14544	79	3.65357	2.64073	4.10743	63	3.32256	2.46284	3.91418	41	1.85199	1.08954	2.84055	69	3.44217	2.59359	3.94986
cg0975	CGbielefeld-CDS-genome-2	complement(912323..912628)		399	48.0028	32.9247	18.1042	826	71.6147	70.3975	30.5727	370	65.9302	47.6531	19.2373	318	64.6178	47.8978	19.7573	312	54.3003	31.9452	21.6159	491	94.3751	71.1094	28.107
pcrA	CGbielefeld-CDS-genome-2	912697..914988		1315	21.1216	14.4871	59.6668	1376	15.9275	15.6568	50.9297	5020	119.424	86.3177	261.004	5951	161.444	119.67	369.734	615	14.2899	8.40684	42.6082	844	21.6583	16.319	48.3143
cg0977	CGbielefeld-CDS-genome-2	complement(914945..917170)		1608	26.5935	18.2403	72.9614	2016	24.0275	23.6191	74.618	1362	33.3623	24.1136	70.8141	1163	32.4864	24.0804	72.2569	937	22.4173	13.1882	64.9169	1057	27.9285	21.0434	60.5073
cg0978	CGbielefeld-CDS-genome-2	complement(917167..917835)		57	3.13663	2.15139	2.58632	60	2.37941	2.33897	2.22077	43	3.50467	2.53311	2.23569	29	2.69537	1.99794	1.80176	39	3.10462	1.82646	2.70199	66	5.8025	4.37204	3.77813
cg0979	CGbielefeld-CDS-genome-2	complement(917836..918345)		65	4.692	3.2182	2.94931	80	4.16163	4.0909	2.96103	60	6.41483	4.63652	3.11957	41	4.99874	3.7053	2.54732	25	2.61059	1.53583	1.73204	61	7.03488	5.30062	3.49191
cg0980	CGbielefeld-CDS-genome-2	complement(918438..919151)		4071	209.903	143.97	184.718	4552	169.141	166.266	168.483	2522	192.598	139.206	131.126	1959	170.602	126.458	121.712	1115	83.166	48.927	77.2491	1911	157.42	118.612	109.394
cg0982	CGbielefeld-CDS-genome-2	919507..920826		333	9.28721	6.37001	15.1096	401	8.05961	7.92263	14.8422	270	11.1531	8.06122	14.038	227	10.693	7.92613	14.1035	220	8.87602	5.22181	15.242	357	15.9071	11.9856	20.4362
purN	CGbielefeld-CDS-genome-2	920798..921430		3505	203.845	139.815	159.036	5549	232.571	228.618	205.385	2997	258.159	186.592	155.822	2006	197.049	146.062	124.632	2213	186.186	109.534	153.32	1633	151.733	114.327	93.4801
purH	CGbielefeld-CDS-genome-2	921438..923000		19194	452.087	310.082	870.909	17404	295.416	290.395	644.172	16867	588.414	425.295	876.962	14150	562.917	417.26	879.136	14932	508.778	299.317	1034.51	17006	639.942	482.181	973.498
citE	CGbielefeld-CDS-genome-2	923065..923886		401	17.9592	12.3181	18.195	616	19.8817	19.5437	22.7999	325	21.5584	15.582	16.8976	238	18.0033	13.3449	14.7869	146	9.45911	5.56484	10.1151	178	12.7364	9.59655	10.1895
amtR	CGbielefeld-CDS-genome-2	complement(923864..924532)		3122	171.8	117.836	141.658	3420	135.626	133.321	126.584	2301	187.54	135.551	119.635	1947	180.962	134.137	120.967	1201	95.6062	56.2456	83.2073	1353	118.951	89.6269	77.4517
cg0987	CGbielefeld-CDS-genome-2	complement(924605..925459)		2639	113.629	77.9369	119.742	2405	74.6264	73.358	89.016	3709	236.535	170.963	192.841	3847	279.771	207.379	239.013	2314	144.134	84.7948	160.318	2872	197.568	148.862	164.406
rpsR	CGbielefeld-CDS-genome-2	complement(925626..925877)		27047	3951.24	2710.12	1227.23	25308	2664.41	2619.12	936.722	24522	5305.91	3835.01	1274.97	24688	6091.61	4515.39	1533.86	19146	4046.2	2380.4	1326.47	25301	5905.2	4449.43	1448.34
rpsN	CGbielefeld-CDS-genome-2	complement(925892..926197)		33501	4030.43	2764.43	1520.08	34703	3008.77	2957.63	1284.46	26684	4754.82	3436.69	1387.37	21349	4338.13	3215.63	1326.41	15027	2615.29	1538.59	1041.1	22409	4307.23	3245.4	1282.79
rpmG	CGbielefeld-CDS-genome-2	complement(926201..926365)		4207	938.65	643.811	190.889	8588	1380.87	1357.4	317.867	3148	1040.29	751.903	163.673	2232	841.118	623.476	138.674	1750	564.837	332.297	121.243	2614	931.792	702.083	149.637
rpmB	CGbielefeld-CDS-genome-2	complement(926368..926604)		15925	2473.7	1696.68	722.581	28492	3189.47	3135.26	1054.57	11742	2701.46	1952.56	610.499	7640	2004.43	1485.78	474.672	6070	1363.99	802.44	420.54	7147	1773.67	1336.42	409.126
cg0992	CGbielefeld-CDS-genome-2	complement(926792..928405)		245	5.58827	3.83294	11.1166	313	5.14499	5.05754	11.585	176	5.94584	4.29754	9.15072	174	6.70336	4.96884	10.8106	146	4.81747	2.83414	10.1151	173	6.30434	4.75017	9.90328
cg0993	CGbielefeld-CDS-genome-2	complement(928398..928712)		29	3.38924	2.32465	1.31585	55	4.63229	4.55356	2.03571	26	4.50056	3.25292	1.35181	22	4.34269	3.219	1.36686	23	3.88854	2.28765	1.59348	21	3.92108	2.95444	1.20213
rpmE	CGbielefeld-CDS-genome-2	928944..929210		12534	1728.2	1185.36	568.718	26620	2645.09	2600.13	985.283	10855	2216.78	1602.25	564.381	8324	1938.51	1436.91	517.168	7503	1496.56	880.432	519.82	9656	2127.08	1602.7	552.752
rpmF	CGbielefeld-CDS-genome-2	929222..929395		1687	356.928	244.814	76.546	3735	569.489	559.809	138.243	1436	449.997	325.249	74.6616	1048	374.506	277.601	65.112	960	293.827	172.86	66.5104	1177	397.855	299.774	67.3766
cgtR2	CGbielefeld-CDS-genome-2	929518..930285		1248	59.823	41.0321	56.6268	1126	38.8974	38.2363	41.6765	1099	78.0262	56.3959	57.14	1199	97.0744	71.9561	74.4936	1191	82.5886	48.5873	82.5145	1872	143.365	108.022	107.161
cgtS2	CGbielefeld-CDS-genome-2	930282..931721		1074	27.4572	18.8327	48.7317	1138	20.9664	20.61	42.1207	965	36.54	26.4104	50.173	912	39.3803	29.1905	56.6624	842	31.14	18.3198	58.3352	850	34.7179	26.1591	48.6577
cg0998	CGbielefeld-CDS-genome-2	931796..933121		1054	29.2626	20.0709	47.8242	1880	37.6147	36.9754	69.5842	923	37.9544	27.4327	47.9893	889	41.6874	30.9007	55.2334	798	32.0501	18.8552	55.2868	1165	51.6749	38.9358	66.6897
cg0999	CGbielefeld-CDS-genome-2	933176..933763		2205	138.053	94.6894	100.05	1807	81.5313	80.1456	66.8823	2011	186.483	134.786	104.557	2034	215.09	159.435	126.372	2188	198.171	116.585	151.588	3195	319.588	240.802	182.896
cg1000	CGbielefeld-CDS-genome-2	933760..933960		390	71.4305	48.9935	17.6959	342	45.1413	44.374	12.6584	331	89.7917	64.8997	17.2096	296	91.5677	67.8743	18.3904	298	78.9568	46.4507	20.6459	328	95.9788	72.3177	18.7762
mscL	CGbielefeld-CDS-genome-2	complement(934037..934444)		8834	797.099	546.723	400.834	10217	664.365	653.073	378.161	4655	622.105	449.646	242.026	3726	567.844	420.913	231.496	4214	550.052	323.598	291.953	7979	1150.23	866.673	456.753
cg1002	CGbielefeld-CDS-genome-2	complement(934526..935179)		273	15.3674	10.5403	12.3871	343	13.9143	13.6778	12.6954	198	16.5079	11.9316	10.2946	206	19.5856	14.5177	12.7987	219	17.8335	10.4915	15.1727	280	25.1813	18.9735	16.0284
cg1003	CGbielefeld-CDS-genome-2	complement(935199..935771)		301	19.3387	13.2642	13.6576	498	23.0578	22.6659	18.4324	331	31.4976	22.7659	17.2096	242	26.2608	19.4657	15.0354	346	32.1581	18.9188	23.9715	454	46.6014	35.113	25.989
galU1	CGbielefeld-CDS-genome-2	935844..936791		2041	79.2592	54.3632	92.6084	2039	57.0627	56.0929	75.4693	1790	102.955	74.4142	93.067	1537	100.812	74.7266	95.4935	1258	70.6711	41.5762	87.1564	2044	126.815	95.5519	117.008
moeA2	CGbielefeld-CDS-genome-2	936820..938079		2386	69.7132	47.8156	108.262	2530	53.2713	52.3659	93.6426	2437	105.46	76.2247	126.706	2009	99.1416	73.4884	124.819	1783	75.3616	44.3356	123.529	2421	113.011	85.1512	138.589
cg1006	CGbielefeld-CDS-genome-2	938084..938746		721	40.0347	27.4594	32.7147	813	32.5327	31.9798	30.0915	715	58.8026	42.5014	37.1748	577	54.1139	40.1118	35.8489	571	45.8661	26.9833	39.5598	703	62.3647	46.9903	40.2428
cg1007	CGbielefeld-CDS-genome-2	938851..939873		1645	59.1978	40.6032	74.6403	1522	39.4714	38.8005	56.3336	1442	76.8588	55.5521	74.9736	1376	83.6353	61.9944	85.4906	1372	71.4246	42.0195	95.0545	2237	128.614	96.9074	128.056
cg1009	CGbielefeld-CDS-genome-2	939896..941098		539	16.4945	11.3134	24.4566	603	13.2983	13.0723	22.3188	473	21.4388	15.4955	24.5926	310	16.023	11.877	19.2602	268	11.8642	6.97977	18.5675	308	15.0585	11.3462	17.6313
cg1010	CGbielefeld-CDS-genome-2	941155..941562		1022	92.2159	63.25	46.3723	1373	89.28	87.7625	50.8187	960	128.297	92.7304	49.913	744	113.386	84.047	46.2246	578	75.4461	44.3854	40.0448	820	118.209	89.0677	46.9404
cg1011	CGbielefeld-CDS-genome-2	941555..942226		1245	68.2048	46.7811	56.4907	1060	41.8485	41.1373	39.2337	1138	92.3373	66.7397	59.1678	1028	95.1197	70.5072	63.8694	669	53.0184	31.191	46.3494	958	83.8482	63.1776	54.8401
cg1012	CGbielefeld-CDS-genome-2	942237..943397		1632	51.7491	35.4942	74.0504	2233	51.027	50.1597	82.6498	1222	57.3909	41.4811	63.5351	1099	58.8589	43.629	68.2806	857	39.3114	23.1271	59.3744	1073	54.3582	40.9576	61.4232
cg1013	CGbielefeld-CDS-genome-2	complement(943572..943706)		0	0	0	0	0	0	0	0	0	0	0	0	0	0	0	0	0	0	0	0	1	0.435676	0.328271	0.0572444
cg1014	CGbielefeld-CDS-genome-2	complement(943847..945409)		1078	25.3907	17.4153	48.9132	1231	20.895	20.5399	45.5629	780	27.2107	19.6674	40.5543	575	22.8747	16.9558	35.7246	417	14.2084	8.3589	28.8905	439	16.5197	12.4472	25.1303
cg1015	CGbielefeld-CDS-genome-2	945457..946305		478	20.7269	14.2164	21.6888	654	20.4368	20.0895	24.2064	426	27.3594	19.7748	22.1489	409	29.9545	22.2037	25.4111	423	26.534	15.6101	29.3062	553	38.3102	28.8658	31.6561
betP	CGbielefeld-CDS-genome-2	946465..948252		7590	156.275	107.188	344.389	9017	133.795	131.52	333.745	6087	185.627	134.167	316.48	5187	180.383	133.708	322.267	3403	101.359	59.6302	235.766	2752	90.527	68.2099	157.537
metS	CGbielefeld-CDS-genome-2	948309..950141		7166	143.923	98.7153	325.15	7052	102.069	100.334	261.015	6321	188.03	135.905	328.646	4931	167.27	123.989	306.362	3958	114.996	67.6527	274.217	4599	147.57	111.191	263.267
cg1018	CGbielefeld-CDS-genome-2	950260..952311		696	12.4867	8.5645	31.5803	757	9.78729	9.62094	28.0188	9299	247.095	178.595	483.481	10280	311.503	230.901	638.694	272	7.05929	4.15302	18.8446	337	9.65939	7.27812	19.2914
cg1019	CGbielefeld-CDS-genome-2	complement(952294..952929)		159	9.20355	6.31263	7.21447	181	7.55032	7.42199	6.69933	1412	121.055	87.4961	73.4138	1592	155.644	115.371	98.9106	60	5.02416	2.95574	4.1569	90	8.32305	6.27122	5.15199
cg1020	CGbielefeld-CDS-genome-2	complement(953300..954460)		117	3.70996	2.54462	5.30876	138	3.15348	3.09989	5.10778	295	13.8546	10.0138	15.3379	451	24.1541	17.9042	28.0205	55	2.5229	1.48423	3.81049	104	5.26864	3.96979	5.95342
cg1021	CGbielefeld-CDS-genome-2	complement(954509..955042)		110	7.58345	5.20141	4.99114	121	6.01157	5.90939	4.47856	70	7.14761	5.16616	3.63949	82	9.54815	7.07754	5.09464	87	8.67656	5.10446	6.02751	160	17.6228	13.2784	9.1591
tnp6a(ISCg6a)	CGbielefeld-CDS-genome-2	955517..955738		154	25.5378	17.5161	6.9876	0	0	0	0	1	0.245613	0.177524	0.0519928	85	23.8074	17.6472	5.28103	116	27.8275	16.3711	8.03668	112	29.6731	22.3579	6.41137
tnp6b(ISCg6a)	CGbielefeld-CDS-genome-2	955746..956225		280	21.4749	14.7295	12.7047	676	37.3636	36.7286	25.0207	222	25.2183	18.2273	11.5424	178	23.0582	17.0918	11.0591	2	0.2219	0.130545	0.138563	207	25.3645	19.1115	11.8496
tnp7a(ISCg7a)	CGbielefeld-CDS-genome-2	956443..956826		286	27.4189	18.8064	12.977	291	20.1051	19.7634	10.7708	224	31.8069	22.9894	11.6464	203	32.8709	24.3654	12.6123	132	18.3068	10.77	9.14518	274	41.9678	31.6218	15.685
cg1025	CGbielefeld-CDS-genome-2	956823..956969		0	0	0	0	0	0	0	0	0	0	0	0	0	0	0	0	0	0	0	0	0	0	0	0
dld	CGbielefeld-CDS-genome-2	complement(957152..958867)		4445	95.3607	65.407	201.688	4733	73.175	71.9313	175.182	3791	120.459	87.0658	197.105	3454	125.156	92.7715	214.596	3454	107.195	63.0634	239.299	4320	148.069	111.566	247.296
cg1028	CGbielefeld-CDS-genome-2	complement(959310..960467)		861	27.3722	18.7743	39.067	871	19.9551	19.6159	32.2382	703	33.1018	23.9253	36.5509	570	30.6064	22.6869	35.414	659	30.3072	17.8299	45.6566	799	40.5822	30.5777	45.7383
tnp6c(ISCg6c)	CGbielefeld-CDS-genome-2	961626..961847		145	24.0453	16.4924	6.57923	494	59.0361	58.0327	18.2844	235	57.719	41.7182	12.2183	87	24.3676	18.0624	5.40529	123	29.5068	17.359	8.52165	97	25.699	19.3636	5.55271
tnp6d(ISCg6c)	CGbielefeld-CDS-genome-2	961855..962334		276	21.1682	14.519	12.5232	95	5.25081	5.16156	3.51623	210	23.8552	17.2421	10.9185	200	25.9081	19.2043	12.426	268	29.7347	17.4931	18.5675	203	24.8744	18.7422	11.6206
cg1032	CGbielefeld-CDS-genome-2	962767..963126		224	22.9066	15.7114	10.1638	196	14.4443	14.1988	7.25453	211	31.9583	23.0989	10.9705	143	24.699	18.3081	8.88456	117	17.3082	10.1825	8.10596	102	16.6646	12.5564	5.83893
cg1033	CGbielefeld-CDS-genome-2	963126..963722		374	23.0628	15.8186	16.9699	561	24.9306	24.5068	20.7642	278	25.3907	18.3519	14.454	169	17.6019	13.0473	10.4999	157	14.0054	8.23943	10.8772	104	10.246	7.72015	5.95342
cg1035	CGbielefeld-CDS-genome-2	964279..965112		821	36.2403	24.8569	37.2521	1182	37.6006	36.9616	43.7492	636	41.581	30.054	33.0674	637	47.492	35.2033	39.5767	582	37.1643	21.864	40.3219	771	54.3733	40.969	44.1354
cg1037	CGbielefeld-CDS-genome-2	965283..966407		3639	119.082	81.677	165.116	4258	100.415	98.7079	157.601	2915	141.283	102.117	151.559	1879	103.853	76.981	116.742	1480	70.0614	41.2175	102.537	1662	86.8912	65.4704	95.1402
ksgA	CGbielefeld-CDS-genome-2	966444..967325		4863	202.979	139.221	220.654	4983	149.888	147.34	184.435	4088	252.724	182.664	212.546	3075	216.782	160.689	191.049	2663	160.795	94.5964	184.497	2474	164.979	124.308	141.623
cg1039	CGbielefeld-CDS-genome-2	967322..968257		2232	87.7877	60.2127	101.275	2585	73.2704	72.025	95.6783	1822	106.139	76.7156	94.7308	1474	97.9193	72.5824	91.5793	1287	73.2271	43.0799	89.1655	1213	76.2223	57.4317	69.4374
cg1040	CGbielefeld-CDS-genome-2	968298..970133		5619	112.668	77.2781	254.957	6059	87.5532	86.0651	224.261	4364	129.603	93.6748	226.896	3356	113.657	84.2478	208.508	2749	79.7391	46.9109	190.455	2874	92.0686	69.3715	164.52
pdxK	CGbielefeld-CDS-genome-2	970137..970931		1482	68.6272	47.0707	67.2443	1765	58.9008	57.8997	65.3278	1105	75.7878	54.778	57.452	823	64.3694	47.7136	51.1328	866	58.0123	34.1289	59.9979	832	61.5536	46.3792	47.6273
cg1043	CGbielefeld-CDS-genome-2	complement(970928..971410)		167	12.7287	8.7305	7.57746	216	11.8645	11.6629	7.99479	154	17.3851	12.5656	8.00688	156	20.0828	14.8863	9.69225	96	10.5851	6.22725	6.65104	119	14.491	10.9186	6.81208
cg1044	CGbielefeld-CDS-genome-2	971490..971822		183	20.2312	13.8764	8.30345	498	39.6761	39.0017	18.4324	117	19.1578	13.8469	6.08315	81	15.1247	11.2112	5.03251	78	12.4744	7.33876	5.40397	119	21.0184	15.8369	6.81208
cg1045	CGbielefeld-CDS-genome-2	971888..972211		342	38.8594	26.6533	15.5179	380	31.1159	30.587	14.0649	423	71.1868	51.4525	21.9929	363	69.664	51.6382	22.5531	669	109.964	64.6924	46.3494	749	135.967	102.448	42.876
pvdS1	CGbielefeld-CDS-genome-2	972334..973296		1218	46.5625	31.9368	55.2656	1443	39.7543	39.0786	53.4096	1290	73.0412	52.7928	67.0707	1287	83.0996	61.5973	79.961	1392	76.9808	45.2882	96.4401	2437	148.842	112.149	139.505
cg1048	CGbielefeld-CDS-genome-2	complement(973711..974505)		254	11.762	8.06746	11.525	404	13.4821	13.253	14.9532	183	12.5513	9.07183	9.51467	156	12.2012	9.04413	9.69225	121	8.10565	4.76859	8.38308	132	9.76572	7.35823	7.55626
cg1049	CGbielefeld-CDS-genome-2	974609..975628		281	10.1419	6.95627	12.7501	301	7.82907	7.696	11.1409	259	13.8453	10.0072	13.4661	205	12.4968	9.26325	12.7366	220	11.4866	6.75763	15.242	308	17.7602	13.3819	17.6313
cg1050	CGbielefeld-CDS-genome-2	975680..976435		2292	111.611	76.5531	103.997	2915	102.296	100.558	107.893	1628	117.419	84.8679	84.6442	991	81.5077	60.4173	61.5706	1609	113.345	66.6816	111.474	1082	84.1788	63.4267	61.9384
cg1051	CGbielefeld-CDS-genome-2	complement(976432..977628)		694	21.3442	14.6398	31.4896	1059	23.4718	23.0728	39.1967	538	24.5071	17.7133	27.9721	420	21.8173	16.172	26.0945	454	20.1991	11.8832	31.4539	629	30.9068	23.2875	36.0067
cmt3	CGbielefeld-CDS-genome-2	977756..979207		2412	61.1541	41.945	109.442	3062	55.9477	54.9968	113.333	1667	62.5998	45.246	86.6719	1279	54.771	40.5988	79.464	837	30.6993	18.0605	57.9888	846	34.269	25.8208	48.4288
cg1053	CGbielefeld-CDS-genome-2	complement(979267..979848)		2274	143.841	98.6592	103.181	2653	120.937	118.881	98.1952	1494	139.969	101.167	77.6772	854	91.2392	67.6308	53.0588	739	67.6224	39.7826	51.1992	637	64.3745	48.5046	36.4647
mmpL2	CGbielefeld-CDS-genome-2	complement(979835..982210)		189	2.9284	2.00856	8.57569	192	2.14387	2.10743	7.10648	131	3.00628	2.17288	6.81105	112	2.93102	2.17261	6.95854	89	1.99486	1.17359	6.16607	127	3.1438	2.36878	7.27004
menG	CGbielefeld-CDS-genome-2	982457..982963		121	8.78603	6.02625	5.49026	163	8.5295	8.38452	6.0331	90	9.67918	6.99593	4.67935	112	13.7359	10.1817	6.95854	94	9.87391	5.80887	6.51248	182	21.1135	15.9085	10.4185
cg1056	CGbielefeld-CDS-genome-2	983101..983760		975	54.3846	37.3019	44.2397	906	36.419	35.8	33.5337	726	59.9787	43.3514	37.7467	506	47.6709	35.3359	31.4377	483	38.9738	22.9285	33.4631	469	41.7952	31.4917	26.8476
cg1057	CGbielefeld-CDS-genome-2	complement(983761..984036)		100	13.3385	9.14873	4.5374	99	9.51634	9.35459	3.66428	88	17.3851	12.5656	4.57536	63	14.1931	10.5206	3.91418	48	9.26193	5.44884	3.32552	61	12.9992	9.79462	3.49191
cg1059	CGbielefeld-CDS-genome-2	984570..986123		566	13.4085	9.19677	25.6817	867	14.8017	14.5501	32.0902	479	16.8069	12.1477	24.9045	441	17.6455	13.0797	27.3992	294	10.0755	5.92746	20.3688	429	16.2369	12.2341	24.5578
prfC	CGbielefeld-CDS-genome-2	complement(986331..988079)		4263	89.7306	61.5454	193.429	5582	84.6728	83.2336	206.606	3190	99.4501	71.8806	165.857	2419	85.9989	63.7464	150.292	2015	61.3557	36.0958	139.603	2030	68.2659	51.4367	116.206
cg1061	CGbielefeld-CDS-genome-2	988209..989480		58	1.67863	1.15136	2.63169	74	1.54343	1.5172	2.73895	37	1.58606	1.14637	1.92373	53	2.59081	1.92043	3.29288	30	1.25604	0.738935	2.07845	39	1.80333	1.35876	2.23253
cg1062	CGbielefeld-CDS-genome-2	989493..990377		98	4.0766	2.7961	4.44665	130	3.89712	3.83088	4.81168	93	5.72986	4.14143	4.83533	73	5.12892	3.8018	4.53547	78	4.69376	2.76136	5.40397	92	6.11423	4.60693	5.26648
cg1064	CGbielefeld-CDS-genome-2	990374..991453		21	0.715831	0.490982	0.952855	36	0.884347	0.869316	1.33246	21	1.06023	0.766314	1.09185	23	1.32419	0.981553	1.42898	16	0.788979	0.464161	1.10851	33	1.79716	1.35412	1.88906
cg1065	CGbielefeld-CDS-genome-2	991450..992178		35	1.76748	1.2123	1.58809	26	0.946214	0.930132	0.962335	28	2.09428	1.51371	1.4558	27	2.30294	1.70705	1.6775	14	1.02275	0.60169	0.969944	26	2.0977	1.58057	1.48835
cg1066	CGbielefeld-CDS-genome-2	992186..992887		106	5.55884	3.81275	4.80965	126	4.76187	4.68093	4.66363	112	8.69932	6.2877	5.82319	87	7.706	5.71205	5.40529	76	5.76562	3.39194	5.26541	85	7.12163	5.36597	4.86577
pth2	CGbielefeld-CDS-genome-2	complement(992884..993489)		298	18.1033	12.4169	13.5215	364	15.9357	15.6649	13.4727	168	15.1161	10.9257	8.73478	144	14.7753	10.9521	8.94669	110	9.66695	5.68712	7.62099	164	15.9173	11.9933	9.38808
cg1068	CGbielefeld-CDS-genome-2	993528..994553		327	11.7332	8.04767	14.8373	502	12.9808	12.7601	18.5805	309	16.4216	11.8692	16.0658	182	11.0299	8.17586	11.3076	378	19.6207	11.5429	26.1885	430	24.6501	18.5732	24.6151
gapX	CGbielefeld-CDS-genome-2	994644..996086		13297	339.236	232.679	603.338	16570	304.649	299.471	613.304	9661	365.056	263.856	502.302	5496	236.825	175.546	341.465	2907	107.287	63.1176	201.402	3067	125.01	94.192	175.569
cg1070	CGbielefeld-CDS-genome-2	996120..996311		512	98.1712	67.3347	23.2315	401	55.4098	54.4681	14.8422	410	116.436	84.1576	21.317	306	99.0984	73.4564	19.0117	184	51.0371	30.0254	12.7478	114	34.9221	26.313	6.52586
pth1	CGbielefeld-CDS-genome-2	complement(996312..996845)		1726	118.991	81.6149	78.3156	2310	114.766	112.816	85.4998	1358	138.664	100.223	70.6062	959	111.667	82.7727	59.5825	644	64.2265	37.7848	44.6174	709	78.0912	58.8399	40.5863
rplY	CGbielefeld-CDS-genome-2	complement(996994..997596)		50875	3106.01	2130.38	2308.4	48789	2146.59	2110.1	1805.82	34628	3131.23	2263.19	1800.41	28917	2981.83	2210.27	1796.61	25208	2226.33	1309.76	1746.45	38672	3772.04	2842.14	2213.75
cg1073	CGbielefeld-CDS-genome-2	997872..998303		215	18.3219	12.5668	9.75542	226	13.8793	13.6434	8.36491	166	20.9521	15.1438	8.6308	140	20.1507	14.9367	8.69817	133	16.396	9.64584	9.21446	169	23.0091	17.3368	9.6743
cg1074	CGbielefeld-CDS-genome-2	complement(998300..998926)		549	32.2344	22.1093	24.9103	672	28.4345	27.9512	24.8727	559	48.6126	35.1362	29.064	549	54.4442	40.3566	34.1092	477	40.5154	23.8354	33.0474	668	62.6623	47.2145	38.2392
prsA	CGbielefeld-CDS-genome-2	complement(998933..999910)		5980	225.101	154.395	271.337	6317	171.362	168.45	233.81	5178	288.687	208.658	269.218	4138	263.086	195.012	257.093	3881	211.336	124.33	268.882	6593	396.498	298.752	377.412
glmU	CGbielefeld-CDS-genome-2	complement(999922..1001379)		5200	131.299	90.0567	235.945	5676	103.283	101.527	210.085	4089	152.92	110.528	212.598	2880	122.824	91.0426	178.934	1940	70.862	41.6885	134.406	2852	115.051	86.688	163.261
cg1077	CGbielefeld-CDS-genome-2	complement(1001483..1002712)		188	5.62688	3.85943	8.53032	211	4.55115	4.4738	7.80972	148	6.56086	4.74207	7.69493	95	4.80248	3.55982	5.90233	85	3.6803	2.16514	5.88894	103	4.92526	3.71107	5.89617
cg1080	CGbielefeld-CDS-genome-2	1002796..1004337		417	9.95559	6.82844	18.921	754	12.9727	12.7522	27.9077	369	13.0481	9.4309	19.1853	367	14.7989	10.9696	22.8016	850	29.3565	17.2706	58.8894	620	23.6486	17.8186	35.4915
cg1081	CGbielefeld-CDS-genome-2	1004477..1005403		156	6.19527	4.24928	7.07835	255	7.29801	7.17396	9.43829	118	6.94075	5.01664	6.13515	78	5.23192	3.87815	4.84612	183	10.5133	6.18505	12.6785	108	6.85238	5.1631	6.18239
cg1082	CGbielefeld-CDS-genome-2	1005423..1006256		117	5.16458	3.54234	5.30876	224	7.12567	7.00456	8.29089	113	7.38783	5.33978	5.87518	63	4.69701	3.48164	3.91418	125	7.98203	4.69587	8.66021	69	4.86609	3.66648	3.94986
cgtS10	CGbielefeld-CDS-genome-2	1006299..1007558		412	12.0377	8.25651	18.6941	512	10.7806	10.5974	18.9506	324	14.021	10.1341	16.8457	272	13.4229	9.94965	16.8993	288	12.1728	7.16133	19.9531	224	10.4562	7.87851	12.8227
cgtR10	CGbielefeld-CDS-genome-2	1007559..1008170		168	10.1059	6.93151	7.62284	216	9.36367	9.20452	7.99479	159	14.1661	10.239	8.26685	140	14.224	10.5435	8.69817	94	8.17986	4.81225	6.51248	120	11.5326	8.68954	6.86933
cg1085	CGbielefeld-CDS-genome-2	complement(1008201..1008335)		1	0.272698	0.187041	0.045374	0	0	0	0	0	0	0	0	0	0	0	0	0	0	0	0	0	0	0	0
cg1086	CGbielefeld-CDS-genome-2	1008519..1009625		448	14.8986	10.2188	20.3276	594	14.2358	13.9939	21.9857	414	20.3919	14.7389	21.525	373	20.9511	15.53	23.1744	287	13.8071	8.12281	19.8838	382	20.2961	15.2926	21.8674
cg1087	CGbielefeld-CDS-genome-2	1009729..1010004		211	28.1442	19.3038	9.57392	284	27.2994	26.8354	10.5117	260	51.3651	37.1257	13.5181	201	45.2828	33.5658	12.4881	173	33.3815	19.6385	11.9857	245	52.2101	39.339	14.0249
cg1088	CGbielefeld-CDS-genome-2	1010134..1011534		405	10.6422	7.2994	18.3765	551	10.4342	10.2568	20.3941	451	17.5526	12.6867	23.4487	320	14.2023	10.5274	19.8815	235	8.93304	5.25535	16.2812	443	18.5979	14.013	25.3593
cg1089	CGbielefeld-CDS-genome-2	1011527..1013263		246	5.21375	3.57606	11.162	290	4.42937	4.35409	10.7337	231	7.25131	5.24111	12.0103	247	8.84186	6.554	15.3461	218	6.68384	3.93214	15.1034	339	11.4788	8.64901	19.4058
ggtB	CGbielefeld-CDS-genome-2	complement(1013264..1014967)		738	15.9442	10.936	33.486	815	12.6891	12.4735	30.1655	873	27.935	20.1909	45.3897	976	35.6145	26.3991	60.6387	1153	36.0354	21.1998	79.8818	970	33.4811	25.2272	55.5271
cg1091	CGbielefeld-CDS-genome-2	1015486..1015737		448	65.4474	44.8898	20.3276	1551	163.288	160.513	57.407	481	104.076	75.2238	25.0085	984	242.796	179.972	61.1357	851	179.845	105.804	58.9587	1042	243.201	183.246	59.6487
cg1092	CGbielefeld-CDS-genome-2	complement(1015810..1016235)		693	59.8879	41.0765	31.4442	902	56.1747	55.2199	33.3856	565	72.3174	52.2697	29.3759	342	49.9187	37.0021	21.2484	329	41.1297	24.1968	22.7937	257	35.483	26.7356	14.7118
tnp3a(ISCg3a)	CGbielefeld-CDS-genome-2	complement(1016612..1017322)		1075	55.6614	38.1776	48.7771	833	31.0827	30.5544	30.8317	948	72.7014	52.5472	49.2891	980	85.7044	63.5281	60.8872	1048	78.4984	46.181	72.6072	1030	85.205	64.1999	58.9617
cg1095	CGbielefeld-CDS-genome-2	1017539..1018033		1824	135.655	93.0443	82.7622	5682	304.537	299.361	210.307	1130	124.474	89.9672	58.7518	584	73.3591	54.3772	36.2838	971	104.468	61.4591	67.2725	652	77.4711	58.3726	37.3233
cg1096	CGbielefeld-CDS-genome-2	1018027..1018491		2004	158.657	108.822	90.9295	2705	154.333	151.71	100.12	1475	172.959	125.012	76.6893	1140	152.44	112.996	70.8279	1262	144.536	85.0312	87.4335	1181	149.381	112.555	67.6056
cg1097	CGbielefeld-CDS-genome-2	complement(1018741..1019340)		145	8.89676	6.1022	6.57923	252	11.1428	10.9534	9.32725	126	11.4505	8.27619	6.55109	126	13.0577	9.67896	7.82835	112	9.94114	5.84842	7.75955	140	13.7238	10.3405	8.01421
tRNA_3550	CGbielefeld-CDS-genome-2	complement(1019721..1019795)		0	0	0	0	0	0	0	0	0	0	0	0	0	0	0	0	0	0	0	0	0	0	0	0
cg1098	CGbielefeld-CDS-genome-2	1019886..1020539		1165	65.5788	44.9799	52.8607	1499	60.809	59.7754	55.4823	942	78.5376	56.7655	48.9772	820	77.962	57.7891	50.9464	760	61.8878	36.4089	52.6541	806	72.4861	54.6165	46.139
mfd	CGbielefeld-CDS-genome-2	1020536..1024189		6623	66.727	45.7674	300.512	7584	55.0647	54.1288	280.706	5631	84.0275	60.7334	292.771	4904	83.4504	61.8574	304.684	5608	81.7351	48.0852	388.532	5775	92.9567	70.0407	330.586
cg1100	CGbielefeld-CDS-genome-2	complement(1024166..1026136)		1064	19.8733	13.6309	48.278	1254	16.8793	16.5924	46.4142	898	24.8424	17.9556	46.6895	721	22.7455	16.86	44.7956	880	23.7775	13.9884	60.9679	870	25.9615	19.5614	49.8026
cg1101	CGbielefeld-CDS-genome-2	complement(1026133..1027866)		969	20.5726	14.1106	43.9674	1050	16.0651	15.7921	38.8635	834	26.2253	18.9552	43.362	646	23.1649	17.1709	40.1358	695	21.3454	12.5576	48.1508	682	23.133	17.4302	39.0407
cg1103	CGbielefeld-CDS-genome-2	complement(1027972..1030470)		425	6.26092	4.2943	19.284	564	5.98765	5.88588	20.8753	904	19.7245	14.2565	47.0015	945	23.5132	17.4291	58.7126	336	7.16048	4.21255	23.2786	323	7.6021	5.728	18.4899
cg1104	CGbielefeld-CDS-genome-2	complement(1030473..1031753)		674	19.3698	13.2856	30.5821	759	15.7194	15.4522	28.0928	502	21.3678	15.4442	26.1004	404	19.6101	14.5359	25.1004	383	15.9228	9.36746	26.5349	413	18.9626	14.2879	23.6419
lysI	CGbielefeld-CDS-genome-2	complement(1031836..1033341)		1394	34.0763	23.3726	63.2514	1401	24.6807	24.2612	51.8551	1129	40.8765	29.5447	58.6998	937	38.6867	28.6764	58.2156	958	33.8774	19.9302	66.3719	920	35.9302	27.0726	52.6648
cg1106	CGbielefeld-CDS-genome-2	1033442..1033654		27	4.66659	3.20077	1.2251	118	14.6976	14.4478	4.36752	21	5.37581	3.88553	1.09185	12	3.50307	2.59664	0.745557	21	5.2506	3.08896	1.45492	23	6.35105	4.78536	1.31662
cg1107	CGbielefeld-CDS-genome-2	1033666..1034253		168	10.5183	7.21443	7.62284	217	9.79098	9.62457	8.0318	102	9.4586	6.8365	5.30326	89	9.41151	6.97625	5.52955	87	7.87973	4.63569	6.02751	166	16.6046	12.5112	9.50257
porC	CGbielefeld-CDS-genome-2	complement(1034227..1034598)		412	40.7727	27.9656	18.6941	463	33.0204	32.4591	17.137	269	39.4288	28.4984	13.9861	238	39.7815	29.4879	14.7869	137	19.6131	11.5385	9.49159	293	46.3257	34.9053	16.7726
porB	CGbielefeld-CDS-genome-2	complement(1034736..1035116)		766	74.0149	50.7661	34.7565	1553	108.141	106.303	57.481	777	111.199	80.3724	40.3984	572	93.3507	69.1959	35.5382	407	56.8904	33.4689	28.1976	723	111.612	84.0969	41.3877
cg1110	CGbielefeld-CDS-genome-2	1035448..1036212		349	16.795	11.5195	15.8355	626	21.7098	21.3408	23.1701	242	17.2488	12.4671	12.5822	127	10.3226	7.65159	7.89048	127	8.84121	5.20133	8.79877	168	12.9165	9.73228	9.61706
eno	CGbielefeld-CDS-genome-2	1036419..1037696		7157	206.165	141.407	324.742	6879	142.803	140.376	254.612	7498	319.903	231.22	389.842	7170	348.847	258.582	445.471	8597	358.249	210.76	595.615	13043	600.266	452.286	746.639
cg1112	CGbielefeld-CDS-genome-2	1037786..1038328		270	18.3054	12.5555	12.251	428	20.9116	20.5562	15.8415	254	25.5058	18.4351	13.2062	185	21.1845	15.703	11.494	189	18.5367	10.9052	13.0942	206	22.3133	16.8126	11.7923
cg1113	CGbielefeld-CDS-genome-2	1038364..1038918		2048	135.848	93.1766	92.926	2937	140.396	138.01	108.707	1978	194.329	140.457	102.842	1463	163.907	121.496	90.8959	1424	136.643	80.3876	98.6571	1517	160.764	121.132	86.8397
ppx2	CGbielefeld-CDS-genome-2	1038918..1039883		4608	175.611	120.45	209.084	4257	116.915	114.928	157.564	3760	212.234	153.399	195.493	3135	201.793	149.579	194.777	3218	177.41	104.371	222.948	3434	209.084	157.54	196.577
tRNA_3551	CGbielefeld-CDS-genome-2	1039983..1040059		0	0	0	0	0	0	0	0	0	0	0	0	0	0	0	0	0	0	0	0	0	0	0	0
tdcB	CGbielefeld-CDS-genome-2	complement(1040188..1041120)		79	3.11717	2.13804	3.58455	76	2.1611	2.12437	2.81298	41	2.39611	1.73186	2.1317	47	3.1323	2.3218	2.9201	47	2.68278	1.5783	3.25624	55	3.4672	2.61245	3.14844
cg1117	CGbielefeld-CDS-genome-2	1041253..1041450		142	26.4021	18.1089	6.44311	187	25.0565	24.6306	6.92141	144	39.6553	28.6621	7.48696	140	43.9652	32.5891	8.69817	215	57.8286	34.0209	14.8956	115	34.161	25.7395	6.5831
cg1118	CGbielefeld-CDS-genome-2	1041466..1041798		200	22.1106	15.1655	9.07481	148	11.7913	11.5909	5.47791	188	30.7835	22.2497	9.77464	282	52.6564	39.0314	17.5206	268	42.8608	25.2152	18.5675	283	49.985	37.6625	16.2002
cg1119	CGbielefeld-CDS-genome-2	1041964..1042155		6	1.15044	0.789078	0.272244	8	1.10543	1.08664	0.296103	4	1.13596	0.82105	0.207971	5	1.61926	1.20027	0.310649	2	0.554751	0.326363	0.138563	5	1.53167	1.15408	0.286222
cg1120	CGbielefeld-CDS-genome-2	1042395..1043390		226	8.35342	5.72953	10.2545	384	10.2286	10.0547	14.213	166	9.08768	6.5684	8.6308	119	7.42907	5.50677	7.39344	79	4.22413	2.48508	5.47325	98	5.78714	4.36047	5.60995
cg1121	CGbielefeld-CDS-genome-2	1043455..1044315		3317	141.827	97.2775	150.506	6311	194.464	191.159	233.588	3519	222.854	161.075	182.963	3208	231.674	171.728	199.312	4596	284.28	167.243	318.419	4458	304.533	229.458	255.195
cg1122	CGbielefeld-CDS-genome-2	complement(1044765..1045217)		1542	125.314	85.952	69.9667	1839	107.703	105.872	68.0667	1238	149.014	107.704	64.367	1023	140.418	104.085	63.5588	812	95.4613	56.1604	56.2567	1095	142.172	107.123	62.6826
greA	CGbielefeld-CDS-genome-2	complement(1045241..1045765)		2381	166.961	114.517	108.036	2707	136.796	134.471	100.194	1940	201.487	145.631	100.866	1480	175.287	129.931	91.9521	1203	122.033	71.7924	83.3459	2187	245.012	184.61	125.193
cg1125	CGbielefeld-CDS-genome-2	complement(1045944..1046282)		1383	150.189	103.013	62.7523	972	76.0695	74.7765	35.9765	1258	202.342	146.249	65.4069	1144	209.833	155.538	71.0765	1720	270.208	158.965	119.164	2508	435.136	327.865	143.569
cg1127	CGbielefeld-CDS-genome-2	1046619..1047503		2569	106.865	73.2978	116.566	2862	85.7966	84.3384	105.931	2122	130.739	94.4959	110.329	1663	116.841	86.6081	103.322	1484	89.3018	52.5367	102.814	1729	114.908	86.5802	98.9755
cg1128	CGbielefeld-CDS-genome-2	1047543..1047863		6046	693.391	475.59	274.331	4228	349.441	343.502	156.491	5411	919.13	664.329	281.333	4350	842.618	624.588	270.265	5671	940.858	553.511	392.896	3798	695.901	524.344	217.414
aroF	CGbielefeld-CDS-genome-2	1048080..1049180		697	23.3056	15.9851	31.6257	737	17.7592	17.4574	27.2785	713	35.3107	25.5219	37.0708	589	33.264	24.6568	36.5944	233	11.2704	6.63041	16.1426	315	16.8275	12.6791	18.032
uppS1	CGbielefeld-CDS-genome-2	1049204..1049974		815	38.9151	26.6915	36.9798	727	25.0163	24.5911	26.9084	866	61.2446	44.2664	45.0257	910	73.3895	54.3997	56.5381	795	54.9139	32.3061	55.0789	1759	134.186	101.106	100.693
cg1131	CGbielefeld-CDS-genome-2	1049995..1050516		199	14.0345	9.62615	9.02943	346	17.5853	17.2864	12.8065	190	19.8467	14.3448	9.87862	200	23.8235	17.6591	12.426	241	24.5876	14.465	16.6969	295	33.2391	25.0448	16.8871
coaA	CGbielefeld-CDS-genome-2	complement(1050894..1051865)		559	21.1719	14.5216	25.3641	515	14.0567	13.8178	19.0616	481	26.9826	19.5025	25.0085	291	18.6154	13.7986	18.0798	268	14.6838	8.63854	18.5675	414	25.0514	18.8756	23.6992
glyA	CGbielefeld-CDS-genome-2	1052094..1053398		27408	773.182	530.319	1243.61	31604	642.503	631.583	1169.76	22883	956.107	691.056	1189.75	18514	882.138	653.882	1150.27	18932	772.601	454.525	1311.64	18668	841.365	633.949	1068.64
pabAB	CGbielefeld-CDS-genome-2	1053491..1055353		709	14.0103	9.60956	32.1702	955	13.5999	13.3687	35.3473	566	16.5656	11.9733	29.4279	426	14.2182	10.5392	26.4673	438	12.5208	7.36603	30.3454	372	11.7443	8.84905	21.2949
cg1135	CGbielefeld-CDS-genome-2	1055350..1056075		293	14.8575	10.1906	13.2946	383	13.9961	13.7582	14.1759	209	15.6969	11.3454	10.8665	160	13.7035	10.1576	9.94076	171	12.5438	7.37958	11.8472	207	16.7699	12.6357	11.8496
cg1136	CGbielefeld-CDS-genome-2	complement(1056107..1056502)		3403	316.36	216.989	154.408	4862	325.734	320.198	179.957	2449	337.208	243.728	127.33	1905	299.121	221.722	118.357	1453	195.407	114.959	100.666	2177	323.341	243.63	124.621
cg1137	CGbielefeld-CDS-genome-2	1056521..1057195		585	31.9056	21.8838	26.5438	801	31.4827	30.9476	29.6473	811	65.5121	47.3509	42.1661	775	71.3912	52.9185	48.1506	420	33.1371	19.4947	29.0983	434	37.8167	28.494	24.8441
cg1138	CGbielefeld-CDS-genome-2	1057253..1057792		1438	98.0348	67.2412	65.2478	1154	56.6964	55.7328	42.7129	2024	204.372	147.716	105.233	2215	255.051	189.056	137.617	1002	98.8197	58.1361	69.4202	808	88.0065	66.3108	46.2535
cg1139	CGbielefeld-CDS-genome-2	complement(1057789..1058670)		2609	108.898	74.6922	118.381	2067	62.175	61.1182	76.5057	4502	278.318	201.163	234.071	4835	340.859	252.661	300.397	2249	135.797	79.8901	155.815	1754	116.966	88.1308	100.407
cg1140	CGbielefeld-CDS-genome-2	complement(1058667..1059320)		3885	218.69	149.997	176.278	2241	90.9092	89.3641	82.9459	6441	537.007	388.138	334.885	7173	681.977	505.513	445.657	3535	287.86	169.349	244.911	3183	286.257	215.688	182.209
cg1141	CGbielefeld-CDS-genome-2	complement(1059310..1060068)		3424	166.076	113.91	155.361	3186	111.365	109.472	117.923	6026	432.904	312.895	313.308	5016	410.925	304.597	311.643	2697	189.238	111.33	186.853	2118	164.128	123.666	121.244
cg1142	CGbielefeld-CDS-genome-2	complement(1060090..1061400)		8503	238.773	163.772	385.815	6127	123.991	121.883	226.778	12521	520.764	376.398	651.001	9252	438.813	325.269	574.825	4808	195.313	114.904	333.106	3881	174.116	131.192	222.165
cg1143	CGbielefeld-CDS-genome-2	1061611..1062264		359	20.2084	13.8607	16.2893	370	15.0096	14.7544	13.6948	333	27.7633	20.0668	17.3136	239	22.7231	16.8434	14.849	188	15.3091	9.00642	13.025	235	21.1343	15.9242	13.4524
cg1144	CGbielefeld-CDS-genome-2	1062374..1063618		1270	37.5534	25.7575	57.625	1431	30.494	29.9757	52.9655	1254	54.9202	39.6953	65.1989	1143	57.0852	42.3142	71.0143	793	33.9214	19.9561	54.9404	815	38.5022	29.0105	46.6542
fum	CGbielefeld-CDS-genome-2	complement(1063677..1065086)		8338	217.7	149.318	378.329	9176	172.655	169.72	339.63	7750	299.7	216.617	402.944	6310	278.264	206.262	392.039	5812	219.521	129.145	402.665	6932	289.159	217.874	396.818
cg1147	CGbielefeld-CDS-genome-2	1065405..1065896		51	3.8161	2.61743	2.31408	76	4.09819	4.02854	2.81298	25	2.77063	2.00256	1.29982	33	4.17057	3.09142	2.05028	21	2.27313	1.33729	1.45492	25	2.98863	2.25186	1.43111
cg1148	CGbielefeld-CDS-genome-2	complement(1065944..1066207)		4	0.557791	0.382583	0.181496	20	2.00988	1.97572	0.740258	13	2.685	1.94066	0.675906	3	0.706584	0.523753	0.186389	3	0.605183	0.356032	0.207845	10	2.22789	1.67866	0.572444
cg1149	CGbielefeld-CDS-genome-2	complement(1066220..1066645)		89	7.69123	5.27534	4.03829	112	6.97513	6.85657	4.14544	62	7.93572	5.73579	3.22355	40	5.83844	4.32773	2.48519	68	8.50097	5.00117	4.71115	79	10.9072	8.21834	4.52231
cg1150	CGbielefeld-CDS-genome-2	complement(1066770..1067336)		38	2.46726	1.69227	1.72421	37	1.73126	1.70184	1.36948	20	1.92332	1.39014	1.03986	15	1.64496	1.21932	0.931947	32	3.00564	1.76823	2.21701	35	3.63063	2.73559	2.00355
ssiE	CGbielefeld-CDS-genome-2	1067579..1069042		114	2.86668	1.96623	5.17264	90	1.63097	1.60325	3.33116	83	3.0913	2.23433	4.3154	63	2.67575	1.98339	3.91418	88	3.20119	1.88327	6.09679	74	2.97295	2.24005	4.23608
ssiF	CGbielefeld-CDS-genome-2	1069039..1070121		23	0.781834	0.536253	1.0436	35	0.8574	0.842827	1.29545	13	0.654514	0.47307	0.675906	6	0.344484	0.255348	0.372779	8	0.393397	0.231437	0.554253	17	0.923247	0.695644	0.973155
ssiG	CGbielefeld-CDS-genome-2	1070118..1071317		51	1.5646	1.07315	2.31408	44	0.972781	0.956247	1.62857	33	1.49947	1.08379	1.71576	26	1.34722	0.998623	1.61537	44	1.95272	1.1488	3.04839	33	1.61745	1.21871	1.88906
ssuD2	CGbielefeld-CDS-genome-2	1071428..1072606		80	2.49799	1.71335	3.62992	84	1.89021	1.85808	3.10908	65	3.0061	2.17275	3.37953	41	2.1623	1.6028	2.54732	47	2.12302	1.24898	3.25624	38	1.89569	1.42836	2.17529
glpX	CGbielefeld-CDS-genome-2	complement(1072945..1073952)		4179	152.625	104.684	189.618	5116	134.652	132.364	189.358	3515	190.138	137.428	182.755	2868	176.915	131.138	178.188	3235	170.916	100.551	224.126	3839	224.004	168.781	219.761
cg1158	CGbielefeld-CDS-genome-2	1074145..1074717		3927	252.302	173.052	178.184	3017	139.69	137.315	111.668	2678	254.836	184.19	139.237	1933	209.761	155.484	120.097	2199	204.381	120.238	152.35	1559	160.025	120.575	89.244
cg1159	CGbielefeld-CDS-genome-2	complement(1074806..1076710)		242	4.67666	3.20768	10.9805	286	3.98304	3.91534	10.5857	161	4.60824	3.33075	8.37083	159	5.18978	3.84691	9.87863	138	3.85792	2.26964	9.56087	149	4.60033	3.46624	8.52941
cg1160	CGbielefeld-CDS-genome-2	complement(1076795..1077022)		96	15.5007	10.6318	4.35591	66	7.67985	7.54932	2.44285	58	13.8707	10.0255	3.01558	49	13.3631	9.90537	3.04436	66	15.4162	9.06945	4.57259	73	18.8315	14.1891	4.17884
cg1161	CGbielefeld-CDS-genome-2	1077021..1077113		0	0	0	0	0	0	0	0	0	0	0	0	0	0	0	0	0	0	0	0	0	0	0	0
xseB	CGbielefeld-CDS-genome-2	complement(1077133..1077378)		118	17.6588	12.112	5.35414	128	13.8044	13.5698	4.73765	93	20.6135	14.8991	4.83533	75	18.9571	14.0519	4.65973	73	15.8036	9.29736	5.05756	83	19.8445	14.9524	4.75128
xseA	CGbielefeld-CDS-genome-2	complement(1077399..1078652)		907	26.6272	18.2633	41.1542	947	20.0353	19.6948	35.0512	668	29.0458	20.9937	34.7312	558	27.6684	20.5091	34.6684	611	25.9485	15.2657	42.3311	757	35.5055	26.7525	43.334
lytB	CGbielefeld-CDS-genome-2	1078766..1079743		4190	157.721	108.18	190.117	3931	106.637	104.825	145.498	3146	175.398	126.774	163.569	2899	184.313	136.621	180.114	3313	180.406	106.134	229.53	3983	239.535	180.484	228.004
cg1165	CGbielefeld-CDS-genome-2	complement(1079785..1080615)		6799	301.203	206.592	308.498	5728	182.871	179.763	212.01	4731	310.425	224.369	245.978	3433	256.874	190.407	213.292	2986	191.363	112.58	206.875	2267	160.453	120.897	129.773
cg1166	CGbielefeld-CDS-genome-2	complement(1080687..1082168)		1045	25.9587	17.8048	47.4159	1291	23.1112	22.7184	47.7837	1016	37.3809	27.0182	52.8246	858	35.9986	26.6839	53.3074	975	35.0369	20.6124	67.5496	1128	44.767	33.7309	64.5717
cg1167	CGbielefeld-CDS-genome-2	complement(1082252..1082434)		63	12.6737	8.6928	2.85856	39	5.65402	5.55792	1.4435	46	13.706	9.90644	2.39167	43	14.6105	10.83	2.67158	50	14.5508	8.56034	3.46408	50	16.07	12.1084	2.86222
cg1169	CGbielefeld-CDS-genome-2	complement(1082438..1084129)		2012	43.7767	30.026	91.2925	1717	26.9224	26.4648	63.5511	1813	58.4254	42.2288	94.2629	1816	66.7363	49.4681	112.828	1742	54.8299	32.2567	120.689	2252	78.2826	58.9841	128.914
cmt5	CGbielefeld-CDS-genome-2	complement(1084417..1085652)		2496	74.3432	50.9913	113.254	2325	49.9055	49.0573	86.055	2476	109.229	78.9484	128.734	1933	97.2434	72.0813	120.097	1319	56.8324	33.4348	91.3825	1726	82.1334	61.8855	98.8038
cg1171	CGbielefeld-CDS-genome-2	1085849..1086934		7485	253.733	174.033	339.625	9262	226.266	222.42	342.813	5187	260.43	188.234	269.686	3540	202.684	150.239	219.939	2375	116.467	68.5182	164.544	2702	146.337	110.261	154.674
cg1172	CGbielefeld-CDS-genome-2	1086968..1087249		3077	401.692	275.517	139.616	2778	261.353	256.911	102.822	2385	461.151	333.311	124.003	1929	425.334	315.277	119.848	1823	344.276	202.539	126.301	1744	363.743	274.072	99.8342
cg1173	CGbielefeld-CDS-genome-2	1087260..1087559		1130	138.667	95.1102	51.2726	1521	134.509	132.223	56.2966	1000	181.754	131.368	51.9928	758	157.107	116.455	47.0944	544	96.5711	56.8133	37.6892	486	95.2823	71.7929	27.8208
arcB	CGbielefeld-CDS-genome-2	1087556..1088389		2328	102.762	70.4834	105.631	2183	69.4435	68.2632	80.7992	1938	126.704	91.5796	100.762	1740	129.727	96.1596	108.106	1358	86.7168	51.0159	94.0845	1447	102.047	76.8899	82.8326
cg1175	CGbielefeld-CDS-genome-2	complement(1088510..1089013)		560	40.9046	28.0561	25.4095	499	26.2672	25.8207	18.4694	414	44.7893	32.3728	21.525	382	47.128	34.9335	23.7336	337	35.6097	20.9494	23.3479	349	40.7279	30.6875	19.9783
cg1176	CGbielefeld-CDS-genome-2	complement(1089130..1089687)		24	1.58341	1.08604	1.08898	29	1.37882	1.35538	1.07337	31	3.02923	2.18947	1.61178	24	2.67438	1.98238	1.49111	7	0.668087	0.393039	0.484972	9	0.948649	0.714784	0.515199
tnp9a(ISCg9a)	CGbielefeld-CDS-genome-2	complement(1090001..1091209)		364	11.0838	7.6023	16.5161	278	6.10045	5.99677	10.2896	150	6.76502	4.88963	7.79891	147	7.56028	5.60403	9.13308	154	6.78366	3.99086	10.6694	143	6.95676	5.24175	8.18595
cg1179	CGbielefeld-CDS-genome-2	1091632..1094688		765	9.21258	6.31882	34.7111	934	8.10579	7.96802	34.57	667	11.8969	8.59887	34.6792	682	13.8719	10.2825	42.3725	763	13.2922	7.8199	52.8619	1230	23.665	17.831	70.4106
cg1180	CGbielefeld-CDS-genome-2	1094696..1095367		151	8.27223	5.67385	6.85148	171	6.75104	6.63629	6.32921	105	8.5197	6.15788	5.45924	111	10.2707	7.61313	6.89641	154	12.2045	7.17998	10.6694	163	14.2664	10.7494	9.33083
cg1181	CGbielefeld-CDS-genome-2	1095309..1096166		246	10.5551	7.23965	11.162	384	11.8737	11.6719	14.213	216	13.7268	9.9215	11.2304	129	9.34865	6.92966	8.01474	208	12.9106	7.59535	14.4106	189	12.956	9.76206	10.8192
cg1182	CGbielefeld-CDS-genome-2	1096163..1096384		38	6.30153	4.32216	1.72421	50	5.97531	5.87376	1.85064	14	3.43858	2.48534	0.727899	8	2.2407	1.66091	0.497038	15	3.59839	2.11695	1.03923	18	4.76888	3.59324	1.0304
cg1183	CGbielefeld-CDS-genome-2	1096522..1096857		370	40.5394	27.8056	16.7884	333	26.2935	25.8466	12.3253	190	30.8332	22.2856	9.87862	179	33.1253	24.5541	11.1212	245	38.8326	22.8454	16.974	243	42.5367	32.0504	13.9104
tnp10c(ISCg10a)	CGbielefeld-CDS-genome-2	complement(1096854..1097147)		243	30.428	20.8703	11.0259	271	24.4549	24.0392	10.0305	176	32.6415	23.5926	9.15072	152	32.1472	23.829	9.44373	173	31.3378	18.4362	11.9857	155	31.0086	23.3642	8.87288
tnp10b(ISCg10a)	CGbielefeld-CDS-genome-2	complement(1097186..1097563)		39	3.79829	2.60521	1.76959	58	4.0708	4.00161	2.14675	39	5.62571	4.06615	2.02772	31	5.09937	3.77989	1.92602	35	4.93112	2.901	2.42486	38	5.91274	4.45511	2.17529
tnp10a(ISCg10a)	CGbielefeld-CDS-genome-2	complement(1097655..1097801)		0	0	0	0	0	0	0	0	0	0	0	0	0	0	0	0	0	0	0	0	0	0	0	0
cg1189	CGbielefeld-CDS-genome-2	1097918..1098106		10	1.94784	1.33601	0.45374	16	2.24596	2.20779	0.592206	20	5.76995	4.17041	1.03986	9	2.96092	2.19478	0.559168	13	3.66312	2.15503	0.900662	20	6.22394	4.68959	1.14489
cg1190	CGbielefeld-CDS-genome-2	complement(1098213..1098581)		44	4.38977	3.0109	1.99646	109	7.83689	7.70369	4.03441	45	6.64952	4.80615	2.33967	32	5.39225	3.99699	1.98815	49	7.07195	4.16046	3.3948	48	7.65089	5.76477	2.74773
cg1191	CGbielefeld-CDS-genome-2	1098699..1099199		201	14.7698	10.1304	9.12018	254	13.4505	13.2219	9.40128	144	15.6722	11.3275	7.48696	145	17.996	13.3395	9.00882	205	21.7914	12.82	14.2027	331	38.8586	29.2791	18.9479
cg1192	CGbielefeld-CDS-genome-2	1099262..1100065		69	3.15943	2.16702	3.13081	104	3.43179	3.37346	3.84934	77	5.22202	3.77438	4.00344	95	7.34707	5.44599	5.90233	100	6.62389	3.89687	6.92817	86	6.29129	4.74034	4.92302
cg1193	CGbielefeld-CDS-genome-2	1100079..1100402		20	2.27248	1.55867	0.907481	18	1.47391	1.44886	0.666232	11	1.85119	1.33801	0.57192	14	2.68676	1.99156	0.869817	21	3.45178	2.0307	1.45492	17	3.08604	2.32526	0.973155
cg1194	CGbielefeld-CDS-genome-2	complement(1100582..1101238)		27	1.51291	1.03769	1.2251	30	1.21143	1.19084	1.11039	28	2.32379	1.67959	1.4558	19	1.79819	1.3329	1.18047	18	1.45907	0.858379	1.24707	24	2.14854	1.61887	1.37387
cg1195	CGbielefeld-CDS-genome-2	1101429..1103126		906	19.6429	13.4729	41.1089	1041	16.2651	15.9887	38.5304	929	29.832	21.562	48.3013	1010	36.9854	27.4153	62.7511	1438	45.1015	26.5334	99.6271	1594	55.2138	41.6023	91.2476
cg1197	CGbielefeld-CDS-genome-2	1103513..1104112		38	2.33156	1.5992	1.72421	81	3.5816	3.52073	2.99804	40	3.63507	2.62736	2.07971	33	3.41987	2.53497	2.05028	20	1.7752	1.04436	1.38563	48	4.7053	3.54533	2.74773
cg1198	CGbielefeld-CDS-genome-2	1104165..1104665		22	1.61659	1.1088	0.998229	17	0.900233	0.884932	0.629219	15	1.63252	1.17995	0.779891	3	0.372332	0.27599	0.186389	9	0.956696	0.562829	0.623535	18	2.11316	1.59221	1.0304
cg1199	CGbielefeld-CDS-genome-2	1104662..1104997		39	4.27307	2.93086	1.76959	95	7.50115	7.37366	3.51623	40	6.4912	4.69172	2.07971	22	4.07127	3.01782	1.36686	31	4.91351	2.89064	2.14773	43	7.52708	5.67147	2.46151
cg1201	CGbielefeld-CDS-genome-2	1105421..1105576		2	0.471977	0.323724	0.0907481	6	1.0204	1.00306	0.222077	6	2.09716	1.51578	0.311957	1	0.398586	0.295451	0.0621298	0	0	0	0	2	0.754054	0.568162	0.114489
cg1202	CGbielefeld-CDS-genome-2	complement(1105570..1107528)		392	7.36659	5.05268	17.7866	515	6.97456	6.85601	19.0616	345	9.6026	6.94058	17.9375	316	10.03	7.43468	19.633	339	9.21583	5.42172	23.4865	413	12.3997	9.34291	23.6419
cg1203	CGbielefeld-CDS-genome-2	complement(1107553..1108926)		621	16.6387	11.4123	28.1773	644	12.4349	12.2236	23.8363	503	19.9611	14.4275	26.1524	550	24.8899	18.4495	34.1714	505	19.5737	11.5153	34.9873	626	26.7969	20.1908	35.835
cg1204	CGbielefeld-CDS-genome-2	1108973..1109674		93	4.87709	3.34515	4.21978	141	5.32875	5.23818	5.21882	89	6.91285	4.99648	4.62736	59	5.22591	3.87369	3.66566	53	4.02076	2.36543	3.67193	70	5.86487	4.41904	4.00711
cg1205	CGbielefeld-CDS-genome-2	1109671..1110378		72	3.74382	2.56785	3.26693	84	3.14767	3.09417	3.10908	57	4.38981	3.17287	2.96359	50	4.3912	3.25496	3.10649	34	2.5575	1.50459	2.35558	25	2.07684	1.56485	1.43111
cg1206	CGbielefeld-CDS-genome-2	1110463..1111158		328	17.3492	11.8997	14.8827	503	19.1735	18.8477	18.6175	348	27.263	19.7052	18.0935	267	23.8533	17.6812	16.5887	394	30.1479	17.7361	27.297	422	35.6616	26.8701	24.1571
cg1207	CGbielefeld-CDS-genome-2	1111261..1112904		512	11.4652	7.8639	23.2315	669	10.7961	10.6126	24.7616	757	25.1072	18.147	39.3585	780	29.5012	21.8677	48.4612	605	19.5985	11.5299	41.9154	912	32.628	24.5844	52.2069
cg1208	CGbielefeld-CDS-genome-2	complement(1112891..1113289)		103	9.50341	6.5183	4.67352	162	10.7717	10.5887	5.99609	125	17.0821	12.3466	6.49909	89	13.8696	10.2808	5.52955	75	10.0105	5.88926	5.19613	91	13.4142	10.1073	5.20924
phnA	CGbielefeld-CDS-genome-2	1113358..1113702		663	70.7473	48.5249	30.083	737	56.6751	55.7118	27.2785	591	93.4055	67.5117	30.7277	419	75.5164	55.9763	26.0324	389	60.0482	35.3267	26.9506	386	65.806	49.5832	22.0963
cg1210	CGbielefeld-CDS-genome-2	complement(1113709..1113801)		0	0	0	0	0	0	0	0	0	0	0	0	0	0	0	0	0	0	0	0	0	0	0	0
cg1211	CGbielefeld-CDS-genome-2	complement(1113950..1114426)		229	17.6739	12.1224	10.3907	301	16.7414	16.4569	11.1409	164	18.7469	13.5499	8.52681	152	19.814	14.6871	9.44373	113	12.6162	7.42219	7.82883	250	30.8261	23.2267	14.3111
cg1212	CGbielefeld-CDS-genome-2	1114571..1115791		220	6.63319	4.54964	9.98229	350	7.60495	7.47569	12.9545	196	8.75275	6.32632	10.1906	116	5.9073	4.37877	7.20705	127	5.53933	3.25882	8.79877	158	7.61095	5.73467	9.04461
tnp1a(ISCg1a)	CGbielefeld-CDS-genome-2	1115955..1117265		780	21.9032	15.0232	35.3917	611	12.3647	12.1545	22.6149	400	16.6365	12.0245	20.7971	308	14.6081	10.8282	19.136	470	19.0926	11.2323	32.5624	580	26.0209	19.6061	33.2017
cg1214	CGbielefeld-CDS-genome-2	complement(1117298..1118374)		193	6.59716	4.52493	8.75719	249	6.13377	6.02952	9.21621	185	9.36613	6.76966	9.61866	233	13.452	9.97125	14.4762	152	7.51618	4.42181	10.5308	269	14.6904	11.0689	15.3987
nadC	CGbielefeld-CDS-genome-2	complement(1118374..1119213)		136	5.96039	4.08818	6.17087	158	4.99024	4.90542	5.84804	117	7.5947	5.48931	6.08315	157	11.6216	8.6145	9.75438	90	5.70601	3.35688	6.23535	263	18.4151	13.8753	15.0553
nadA	CGbielefeld-CDS-genome-2	complement(1119217..1120503)		168	4.80558	3.2961	7.62284	237	4.88555	4.80251	8.77206	149	6.31265	4.56267	7.74692	201	9.711	7.19825	12.4881	86	3.55868	2.09359	5.95822	230	10.5111	7.91983	13.1662
cg1218	CGbielefeld-CDS-genome-2	complement(1120552..1121196)		72	4.10949	2.81866	3.26693	85	3.49625	3.43683	3.1461	54	4.56497	3.29948	2.80761	85	8.19419	6.07392	5.28103	43	3.55041	2.08872	2.97911	99	9.02761	6.80209	5.66719
cg1219	CGbielefeld-CDS-genome-2	1121353..1122276		252	10.0402	6.8865	11.4343	346	9.93454	9.76569	12.8065	205	12.0972	8.74365	10.6585	188	12.6512	9.37768	11.6804	170	9.7982	5.76433	11.7779	190	12.0942	9.11273	10.8764
cg1220	CGbielefeld-CDS-genome-2	complement(1122299..1122928)		208	12.1545	8.33667	9.4378	268	11.2859	11.0941	9.91946	177	15.3192	11.0724	9.20272	118	11.6463	8.63279	7.33131	148	12.511	7.36026	10.2537	205	19.1386	14.4205	11.7351
cg1221	CGbielefeld-CDS-genome-2	complement(1122934..1123278)		29	3.09453	2.12251	1.31585	17	1.30729	1.28508	0.629219	20	3.16093	2.28466	1.03986	9	1.62207	1.20236	0.559168	16	2.46985	1.45302	1.10851	22	3.7506	2.82599	1.25938
lplA	CGbielefeld-CDS-genome-2	complement(1123284..1124342)		45	1.56434	1.07297	2.04183	77	1.92903	1.89624	2.84999	40	2.05953	1.48859	2.07971	40	2.34861	1.7409	2.48519	35	1.76012	1.03549	2.42486	54	2.99913	2.25977	3.0912
phnB2	CGbielefeld-CDS-genome-2	1124519..1124932		77	6.84708	4.69635	3.4938	97	6.21606	6.11041	3.59025	67	8.82427	6.37801	3.48351	29	4.35556	3.22855	1.80176	25	3.21595	1.89196	1.73204	55	7.81375	5.88748	3.14844
benK3	CGbielefeld-CDS-genome-2	complement(1124999..1126294)		149	4.23249	2.90303	6.76073	244	4.99492	4.91002	9.03115	173	7.27856	5.2608	8.99475	141	6.76489	5.01445	8.7603	114	4.68456	2.75595	7.89811	123	5.5821	4.20598	7.04106
pobB	CGbielefeld-CDS-genome-2	complement(1126301..1127488)		32	0.991628	0.680148	1.45197	53	1.1836	1.16348	1.96168	42	1.92769	1.3933	2.1837	30	1.57019	1.1639	1.86389	32	1.43451	0.843928	2.21701	25	1.23772	0.932589	1.43111
cg1227	CGbielefeld-CDS-genome-2	1127875..1128480		61	3.70572	2.54172	2.76782	81	3.54614	3.48587	2.99804	31	2.78929	2.01604	1.61178	30	3.07819	2.2817	1.86389	36	3.16373	1.86124	2.49414	35	3.39698	2.55954	2.00355
cg1228	CGbielefeld-CDS-genome-2	1128481..1129821		87	2.38839	1.63818	3.94754	99	1.95862	1.92533	3.66428	84	3.4155	2.46866	4.36739	61	2.82844	2.09658	3.78992	56	2.22397	1.30837	3.87977	116	5.08776	3.8335	6.64035
cg1229	CGbielefeld-CDS-genome-2	1129818..1130573		48	2.33741	1.60321	2.17795	60	2.10559	2.0698	2.22077	47	3.38985	2.45012	2.44366	47	3.86565	2.8654	2.9201	37	2.60645	1.53339	2.56342	136	10.5807	7.9723	7.78524
cg1230	CGbielefeld-CDS-genome-2	1130570..1131103		22	1.51669	1.04028	0.998229	20	0.993648	0.976759	0.740258	22	2.24639	1.62365	1.14384	16	1.86305	1.38098	0.994076	31	3.09165	1.81883	2.14773	36	3.96514	2.98764	2.0608
chaA	CGbielefeld-CDS-genome-2	1131123..1132175		485	16.9562	11.6301	22.0064	485	12.2196	12.0119	17.9513	336	17.3986	12.5754	17.4696	275	16.2387	12.0369	17.0857	287	14.5152	8.53936	19.8838	224	12.5117	9.42728	12.8227
cg1232	CGbielefeld-CDS-genome-2	1132195..1132899		963	50.2866	34.4911	43.6952	1006	37.8576	37.2141	37.235	607	46.9466	33.9321	31.5596	614	54.1534	40.1411	38.1477	551	41.6229	24.4869	38.1742	879	73.3326	55.2544	50.3178
cg1233	CGbielefeld-CDS-genome-2	complement(1132866..1133591)		458	23.2244	15.9294	20.7813	478	17.4677	17.1708	17.6922	312	23.4327	16.9367	16.2217	305	26.1222	19.363	18.9496	256	18.779	11.0478	17.7361	281	22.765	17.1529	16.0857
cg1234	CGbielefeld-CDS-genome-2	complement(1133598..1135940)		1443	22.673	15.5512	65.4747	1775	20.0988	19.7572	65.6979	1271	29.5786	21.3788	66.0828	1118	29.6699	21.9927	69.4611	1157	26.2985	15.4715	80.1589	1266	31.7804	23.9457	72.4714
tpx	CGbielefeld-CDS-genome-2	1136020..1136526		1972	143.19	98.213	89.4776	2616	136.891	134.564	96.8257	1692	181.969	131.523	87.9717	1093	134.048	99.3623	67.9078	1344	141.176	83.0545	93.1146	1456	168.908	127.268	83.3478
cg1237	CGbielefeld-CDS-genome-2	complement(1136523..1138301)		1503	31.1027	21.3331	68.1972	1997	29.7814	29.2753	73.9148	1040	31.8758	23.0392	54.0725	815	28.4858	21.115	50.6358	666	19.9374	11.7293	46.1416	874	28.8957	21.7722	50.0316
cg1238	CGbielefeld-CDS-genome-2	complement(1138403..1139359)		672	25.8507	17.7308	30.4913	1050	29.1086	28.6138	38.8635	600	34.1856	24.7087	31.1957	398	25.8594	19.1682	24.7277	421	23.4282	13.783	29.1676	397	24.3992	18.3842	22.726
cg1239	CGbielefeld-CDS-genome-2	1139428..1140330		213	8.68374	5.9561	9.66467	460	13.5149	13.2852	17.0259	189	11.4124	8.24869	9.82663	119	8.19419	6.07392	7.39344	143	8.43369	4.96158	9.90728	127	8.27205	6.23279	7.27004
cg1240	CGbielefeld-CDS-genome-2	1140348..1140716		1337	133.389	91.4903	60.6651	1311	94.2584	92.6563	48.5239	1096	161.953	117.056	56.9841	884	148.961	110.417	54.9227	560	80.8223	47.5482	38.7977	815	129.906	97.8809	46.6542
cg4004	CGbielefeld-CDS-genome-2	1140703..1140963		549	77.4367	53.1131	24.9103	782	79.4895	78.1385	28.9441	382	79.8044	57.6811	19.8612	270	64.3235	47.6796	16.775	211	43.0538	25.3288	14.6184	220	49.5769	37.355	12.5938
cg1241	CGbielefeld-CDS-genome-2	1140825..1141088		746	104.028	71.3518	33.849	726	72.9586	71.7185	26.8714	565	116.694	84.3442	29.3759	403	94.9178	70.3575	25.0383	328	66.1667	38.9262	22.7244	289	64.386	48.5133	16.5436
cg1242	CGbielefeld-CDS-genome-2	complement(1141100..1141489)		759	71.6461	49.1414	34.4389	944	64.2172	63.1257	34.9402	598	83.6066	60.4293	31.0917	465	74.137	54.9538	28.8903	456	62.2687	36.633	31.5924	328	49.466	37.2714	18.7762
cg1243	CGbielefeld-CDS-genome-2	complement(1141493..1142329)		1564	68.7902	47.1825	70.965	1737	55.0577	54.1219	64.2914	1421	92.5705	66.9082	73.8817	1407	104.524	77.478	87.4166	1237	78.707	46.3038	85.7014	1821	127.962	96.4165	104.242
cg1244	CGbielefeld-CDS-genome-2	complement(1142366..1142713)		104	11.0019	7.54613	4.7189	227	17.3057	17.0116	8.40193	80	12.5347	9.05986	4.15942	42	7.50441	5.56262	2.60945	50	7.65174	4.50156	3.46408	41	6.9295	5.22121	2.34702
cg1245	CGbielefeld-CDS-genome-2	1142741..1143943		718	21.9722	15.0705	32.5786	803	17.709	17.408	29.7214	674	30.5491	22.0803	35.0431	685	35.4056	26.2443	42.5589	548	24.2596	14.2721	37.9664	569	27.8192	20.9611	32.5721
cg1246	CGbielefeld-CDS-genome-2	complement(1143944..1144483)		948	64.6293	44.3287	43.0146	735	36.1108	35.4971	27.2045	698	70.48	50.9416	36.2909	776	89.3541	66.2335	48.2127	725	71.5012	42.0646	50.2292	721	78.5306	59.1709	41.2732
cg1247	CGbielefeld-CDS-genome-2	complement(1144491..1145207)		1415	72.6528	49.8319	64.2042	1780	65.8635	64.744	65.883	1098	83.5002	60.3523	57.088	1138	98.6892	73.1531	70.7037	1037	77.0245	45.3139	71.8451	1035	84.9021	63.9717	59.2479
cg1248	CGbielefeld-CDS-genome-2	1145577..1147499		30017	574.65	394.147	1361.99	31917	440.338	432.854	1181.34	22860	648.188	468.498	1188.55	16449	531.872	394.248	1021.97	9597	265.782	156.361	664.896	12027	367.854	277.169	688.478
cg1249	CGbielefeld-CDS-genome-2	1147571..1149073		1242	30.4213	20.8657	56.3545	1896	33.4675	32.8987	70.1765	1105	40.0874	28.9744	57.452	1079	44.6384	33.0881	67.038	989	35.0434	20.6162	68.5196	1265	49.5027	37.2991	72.4141
cg1250	CGbielefeld-CDS-genome-2	1149060..1149932		795	33.5249	22.9944	36.0724	1206	36.6502	36.0273	44.6376	656	40.9726	29.6142	34.1072	526	37.4643	27.7703	32.6803	522	31.8439	18.7339	36.165	765	51.54	38.8342	43.792
cg1251	CGbielefeld-CDS-genome-2	1149940..1150353		286	25.432	17.4436	12.977	404	25.8896	25.4495	14.9532	236	31.0825	22.4658	12.2703	178	26.7341	19.8166	11.0591	229	29.4581	17.3303	15.8655	234	33.244	25.0485	13.3952
fdxC	CGbielefeld-CDS-genome-2	1150421..1150738		4438	513.778	352.395	201.37	3034	253.123	248.821	112.297	3678	630.651	455.822	191.229	2828	552.967	409.885	175.703	2862	479.305	281.978	198.284	3500	647.349	487.762	200.355
dapC	CGbielefeld-CDS-genome-2	1150747..1151850		4199	140.021	96.0388	190.526	4427	106.386	104.578	163.856	3613	178.444	128.976	187.85	3133	176.457	130.798	194.653	2690	129.764	76.3405	186.368	2937	156.47	117.897	168.127
cg1254	CGbielefeld-CDS-genome-2	1151876..1152499		4156	245.192	168.175	188.574	3709	157.694	155.014	137.281	3245	283.553	204.947	168.716	2952	294.156	218.043	183.407	2600	221.9	130.545	180.132	2845	268.161	202.053	162.86
cg1255	CGbielefeld-CDS-genome-2	1152654..1153841		718	22.2496	15.2608	32.5786	1151	25.7041	25.2672	42.6018	703	32.2658	23.3211	36.5509	620	32.4505	24.0539	38.5205	304	13.6278	8.01732	21.0616	241	11.9316	8.99016	13.7959
dapD	CGbielefeld-CDS-genome-2	complement(1153838..1154731)		2437	100.354	68.8316	110.577	2726	80.8969	79.522	100.897	2041	124.483	89.9739	106.117	1829	127.21	94.2944	113.635	1298	77.3226	45.4893	89.9276	1380	90.7902	68.4082	78.9973
aroP	CGbielefeld-CDS-genome-2	complement(1154760..1156151)		3143	83.1228	57.0132	142.611	3429	65.354	64.2432	126.917	2969	116.299	84.0586	154.366	2422	108.189	80.1945	150.478	2433	93.0834	54.7614	168.562	2042	86.2807	65.0105	116.893
dapD2	CGbielefeld-CDS-genome-2	complement(1156194..1157144)		498	19.2781	13.2227	22.5963	645	17.9938	17.688	23.8733	451	25.8583	18.6899	23.4487	458	29.9455	22.197	28.4554	450	25.2	14.8253	31.1768	564	34.8816	26.2824	32.2858
dapE	CGbielefeld-CDS-genome-2	1157199..1158308		621	20.596	14.1266	28.1773	723	17.2806	16.9869	26.7603	600	29.4736	21.3029	31.1957	516	28.905	21.4258	32.059	652	31.282	18.4033	45.1717	1142	60.5119	45.5942	65.3731
cg1261	CGbielefeld-CDS-genome-2	1158370..1159140		199	9.50197	6.51732	9.02943	322	11.0801	10.8918	11.9182	185	13.0834	9.45645	9.61866	151	12.1778	9.02676	9.3816	155	10.7065	6.29868	10.7387	188	14.3417	10.8061	10.7619
folP2	CGbielefeld-CDS-genome-2	1159144..1159995		136	5.87644	4.0306	6.17087	258	8.03385	7.89731	9.54933	175	11.1996	8.09486	9.09873	197	14.3772	10.657	12.2396	126	7.8759	4.63343	8.72949	148	10.2169	7.69819	8.47217
cg1263	CGbielefeld-CDS-genome-2	1160007..1160723		289	14.8386	10.1777	13.1131	271	10.0275	9.85709	10.0305	1540	117.113	84.6472	80.0688	1663	144.218	106.901	103.322	233	17.3064	10.1814	16.1426	238	19.5234	14.7104	13.6242
cg1264	CGbielefeld-CDS-genome-2	1160735..1161043		105	12.5097	8.58027	4.76427	269	23.096	22.7035	9.95647	84	14.8226	10.7135	4.36739	40	8.04912	5.96638	2.48519	47	8.10044	4.76553	3.25624	63	11.9917	9.03543	3.6064
cg1265	CGbielefeld-CDS-genome-2	1161103..1161270		40	8.76528	6.01202	1.81496	95	15.0023	14.7473	3.51623	30	9.7368	7.03757	1.55978	22	8.14254	6.03563	1.36686	57	18.069	10.6301	3.94906	67	23.4565	17.6739	3.83537
rrmA	CGbielefeld-CDS-genome-2	1161333..1162199		3259	138.382	94.9151	147.874	3311	101.317	99.5953	122.55	2720	171.062	123.64	141.42	2425	173.916	128.915	150.665	2482	152.459	89.6922	171.957	3166	214.778	161.83	181.236
cg1267	CGbielefeld-CDS-genome-2	complement(1162203..1163699)		1257	30.9121	21.2023	57.0352	1804	31.9712	31.4278	66.7713	1047	38.1355	27.5636	54.4364	642	26.6661	19.7662	39.8873	702	24.9738	14.6922	48.6357	659	25.8917	19.5088	37.7241
glgA	CGbielefeld-CDS-genome-2	complement(1163844..1165016)		689	21.624	14.8317	31.2627	931	21.0569	20.6991	34.459	679	31.5628	22.813	35.3031	504	26.7165	19.8035	31.3134	602	27.3318	16.0794	41.7076	702	35.1995	26.522	40.1856
glgC	CGbielefeld-CDS-genome-2	1165158..1166387		769	23.0163	15.7867	34.8926	734	15.832	15.5629	27.1675	807	35.7744	25.8571	41.9582	749	37.8637	28.0664	46.5352	719	31.131	18.3145	49.8135	952	45.5228	34.3004	54.4967
cg1270	CGbielefeld-CDS-genome-2	complement(1166439..1167080)		845	48.4548	33.2347	38.3411	1013	41.8618	41.1503	37.4941	751	63.7836	46.1016	39.0466	711	68.8622	51.0439	44.1743	521	43.2187	25.4258	36.0958	1575	144.292	108.721	90.1599
sigE	CGbielefeld-CDS-genome-2	1167205..1167855		2151	121.639	83.4314	97.5995	3514	143.207	140.773	130.063	2300	192.642	139.238	119.583	2096	200.197	148.395	130.224	1533	125.41	73.7791	106.209	2046	184.851	139.281	117.122
cg1272	CGbielefeld-CDS-genome-2	1168044..1168538		1579	117.434	80.5466	71.6456	2776	148.785	146.256	102.748	1661	182.965	132.244	86.36	1491	187.292	138.83	92.6355	2006	215.822	126.969	138.979	2497	296.695	223.553	142.939
cg1273	CGbielefeld-CDS-genome-2	1168578..1169048		653	51.0396	35.0076	29.6292	1525	85.8999	84.4399	56.4447	577	66.7973	48.2798	29.9998	538	71.0245	52.6467	33.4258	581	65.6938	38.648	40.2527	599	74.8003	56.3602	34.2894
mrp	CGbielefeld-CDS-genome-2	complement(1169052..1170179)		6134	200.193	137.311	278.324	7226	169.954	167.066	267.455	5164	249.621	180.421	268.491	4387	241.827	179.254	272.563	3405	160.76	94.5758	235.904	3599	187.659	141.397	206.023
cg1275	CGbielefeld-CDS-genome-2	complement(1170212..1170793)		280	17.7113	12.148	12.7047	318	14.496	14.2496	11.7701	232	21.7355	15.71	12.0623	241	25.7478	19.0855	14.9733	245	22.4188	13.1891	16.974	308	31.1261	23.4528	17.6313
mgtE1	CGbielefeld-CDS-genome-2	complement(1170786..1172078)		1000	28.4719	19.5286	45.374	966	19.8209	19.484	35.7545	730	30.7842	22.2503	37.9547	708	34.0472	25.2374	43.9879	594	24.4657	14.3933	41.1533	758	34.4801	25.9799	43.3912
cg1277	CGbielefeld-CDS-genome-2	1172161..1172658		466	34.4486	23.628	21.1443	1051	55.9909	55.0392	38.9006	449	49.1611	35.5327	23.3447	565	70.5449	52.2912	35.1033	978	104.587	61.5292	67.7575	1476	174.323	131.348	84.4927
cg1278	CGbielefeld-CDS-genome-2	1172674..1173342		840	46.2241	31.7047	38.1142	1164	46.1605	45.3759	43.083	704	57.3787	41.4722	36.6029	627	58.2758	43.1967	38.9554	846	67.3463	39.6202	58.6123	1353	118.951	89.6269	77.4517
cg1279	CGbielefeld-CDS-genome-2	complement(1173334..1173867)		303	20.8889	14.3275	13.7483	454	22.5558	22.1724	16.8039	303	30.939	22.3621	15.7538	378	44.0146	32.6257	23.4851	489	48.7682	28.6906	33.8787	1047	115.319	86.8905	59.9349
odhA	CGbielefeld-CDS-genome-2	complement(1173966..1177739)		52146	508.668	348.89	2366.07	58515	411.348	404.356	2165.81	39097	564.866	408.275	2032.76	28919	476.462	353.176	1796.73	32989	465.518	273.867	2285.53	36532	569.336	428.981	2091.25
cg1281	CGbielefeld-CDS-genome-2	complement(1177773..1181516)		1511	14.8574	10.1906	68.5602	1646	11.6637	11.4655	60.9232	1401	20.4036	14.7473	72.8419	1044	17.3385	12.8521	64.8635	1075	15.2912	8.9959	74.4778	1115	17.5161	13.1979	63.8275
cg1282	CGbielefeld-CDS-genome-2	complement(1181586..1182305)		1480	75.6736	51.9038	67.1536	1425	52.5081	51.6156	52.7434	1290	97.6925	70.6103	67.0707	1083	93.5282	69.3275	67.2866	1071	79.2185	46.6046	74.2007	1155	94.3511	71.0913	66.1173
aroE2	CGbielefeld-CDS-genome-2	complement(1182337..1183143)		2054	93.7005	64.2683	93.1982	3044	100.073	98.3716	112.667	1525	103.039	74.4744	79.289	1108	85.3715	63.2814	68.8398	1067	70.4142	41.425	73.9236	1224	89.2083	67.2163	70.0671
lipT	CGbielefeld-CDS-genome-2	1183395..1185074		365	7.99832	5.48597	16.5615	688	10.8648	10.6802	25.4649	323	10.4833	7.57712	16.7937	295	10.9184	8.09324	18.3283	377	11.9509	7.03079	26.1192	580	20.3056	15.2998	33.2017
cg1285	CGbielefeld-CDS-genome-2	1185075..1185728		374	21.0528	14.4399	16.9699	491	19.9181	19.5795	18.1733	670	55.86	40.3746	34.8351	913	86.804	64.3432	56.7245	217	17.6706	10.3957	15.0341	242	21.7638	16.3985	13.8531
cg1286	CGbielefeld-CDS-genome-2	1185823..1186626		1212	55.496	38.0642	54.9933	2030	66.9859	65.8474	75.1362	3882	263.271	190.288	201.836	3499	270.604	200.585	217.392	965	63.9206	37.6048	66.8568	854	62.474	47.0726	48.8867
cg1287	CGbielefeld-CDS-genome-2	complement(1186683..1187156)		341	26.4845	18.1654	15.4725	284	15.8958	15.6257	10.5117	7132	820.422	592.985	370.812	8372	1098.24	814.067	520.151	42	4.7189	2.77615	2.90983	81	10.0509	7.5731	4.6368
cg1288	CGbielefeld-CDS-genome-2	1187293..1188510		539	16.2913	11.1741	24.4566	523	11.392	11.1983	19.3577	642	28.7403	20.773	33.3793	629	32.1107	23.802	39.0796	580	25.36	14.9194	40.1834	688	33.223	25.0327	39.3841
cg1289	CGbielefeld-CDS-genome-2	1188511..1189860		444	12.1078	8.30461	20.1461	421	8.27355	8.13293	15.5824	399	16.1155	11.648	20.7451	369	16.9957	12.598	22.9259	249	9.82279	5.7788	17.2511	284	12.3732	9.32291	16.2574
metE	CGbielefeld-CDS-genome-2	complement(1189853..1192090)		2955	48.6085	33.3401	134.08	2592	30.7269	30.2046	95.9374	2807	68.389	49.4303	145.944	2736	76.0156	56.3463	169.987	2077	49.4249	29.0769	143.898	2915	76.6083	57.7225	166.867
cg1291	CGbielefeld-CDS-genome-2	1192555..1193013		466	37.3756	25.6356	21.1443	799	46.1825	45.3976	29.5733	301	35.7567	25.8443	15.6498	390	52.8322	39.1617	24.2306	675	78.3178	46.0748	46.7651	938	120.195	90.5643	53.6952
cg1292	CGbielefeld-CDS-genome-2	1193866..1195278		651	16.9611	11.6335	29.5385	1177	22.0993	21.7237	43.5642	606	23.3849	16.9021	31.5076	524	23.0587	17.0922	32.556	359	13.5307	7.96021	24.8721	312	12.987	9.78541	17.8602
cg1293	CGbielefeld-CDS-genome-2	1195335..1195661		119	13.3972	9.18902	5.39951	139	11.2774	11.0858	5.14479	133	22.1773	16.0293	6.91504	120	22.8181	16.9139	7.45557	142	23.1265	13.6054	9.838	122	21.9437	16.534	6.98382
cg1294	CGbielefeld-CDS-genome-2	1195684..1196580		163	6.68976	4.58844	7.39597	243	7.18716	7.06501	8.99413	140	8.5102	6.15101	7.27899	142	9.84334	7.29635	8.82243	119	7.06519	4.15649	8.24452	167	10.9502	8.2507	9.55981
cg1295	CGbielefeld-CDS-genome-2	complement(1196590..1197384)		17	0.787221	0.539948	0.771358	28	0.934404	0.918522	1.03636	22	1.5089	1.0906	1.14384	19	1.48605	1.10153	1.18047	14	0.937843	0.551738	0.969944	15	1.10974	0.836163	0.858666
cg1296	CGbielefeld-CDS-genome-2	1197442..1199091		139	3.10132	2.12716	6.30699	143	2.2993	2.26022	5.29284	74	2.44541	1.7675	3.84746	39	1.4697	1.08941	2.42306	80	2.58211	1.51907	5.54253	36	1.28326	0.966908	2.0608
cydC	CGbielefeld-CDS-genome-2	complement(1199455..1201011)		8650	204.523	140.281	392.485	5663	96.4943	94.8542	209.604	5238	183.435	132.583	272.338	1547	61.7801	45.7943	96.1148	5511	188.5	110.895	381.811	1289	48.6924	36.6886	73.788
cydD	CGbielefeld-CDS-genome-2	complement(1201008..1202543)		8816	211.298	144.927	400.017	6368	109.991	108.121	235.698	5759	204.437	147.763	299.426	1765	71.4497	52.9618	109.659	5878	203.802	119.898	407.238	1403	53.7234	40.4793	80.3139
cydB	CGbielefeld-CDS-genome-2	complement(1202555..1203556)		9148	336.104	230.531	415.082	6127	162.227	159.47	226.778	6406	348.597	251.959	333.066	1909	118.464	87.8108	118.606	6289	334.259	196.646	435.713	1687	99.025	74.6129	96.5713
cydA	CGbielefeld-CDS-genome-2	complement(1203559..1205100)		13193	314.974	216.038	598.62	9997	172	169.077	370.018	9324	329.702	238.303	484.78	3198	128.956	95.588	198.691	8665	299.263	176.058	600.326	2497	95.2427	71.7631	142.939
cg1302	CGbielefeld-CDS-genome-2	complement(1205381..1208296)		767	9.68329	6.64168	34.8019	885	8.05192	7.91507	32.7564	659	12.3226	8.90654	34.2632	455	9.70221	7.19173	28.269	467	8.52901	5.01766	32.3545	580	11.6987	8.81469	33.2017
cg1303	CGbielefeld-CDS-genome-2	complement(1208296..1208691)		139	12.9221	8.86318	6.30699	252	16.883	16.596	9.32725	104	14.32	10.3502	5.40725	56	8.79305	6.51782	3.47927	70	9.41396	5.53828	4.84972	94	13.9614	10.5196	5.38097
cg1304	CGbielefeld-CDS-genome-2	1208842..1209609		826	39.5944	27.1574	37.4789	1442	49.8136	48.9669	53.3726	588	41.7465	30.1736	30.5717	285	23.0744	17.1038	17.707	255	17.6827	10.4028	17.6668	190	14.5509	10.9638	10.8764
cg1305	CGbielefeld-CDS-genome-2	complement(1209677..1211083)		2544	66.5638	45.6555	115.432	3341	62.9979	61.9272	123.66	1836	71.1513	51.4268	95.4587	1173	51.8383	38.425	72.8782	820	31.0377	18.2596	56.811	640	26.7537	20.1582	36.6364
cg1307	CGbielefeld-CDS-genome-2	1211402..1213600		33453	560.048	384.131	1517.9	42346	510.894	502.211	1567.35	25793	639.559	462.261	1341.05	23163	654.962	485.489	1439.11	17959	434.937	255.876	1244.23	20626	551.68	415.678	1180.72
cg1308	CGbielefeld-CDS-genome-2	complement(1213894..1214583)		252	13.4452	9.22192	11.4343	492	18.9173	18.5958	18.2103	239	18.8866	13.6509	12.4263	193	17.3922	12.8919	11.991	196	15.1278	8.89977	13.5792	285	24.2937	18.3047	16.3147
cg1309	CGbielefeld-CDS-genome-2	1214737..1216329		113	2.61143	1.79115	5.12726	83	1.38231	1.35882	3.07207	74	2.53291	1.83074	3.84746	43	1.67841	1.24412	2.67158	64	2.1396	1.25874	4.43403	78	2.87989	2.16993	4.46506
tfdF	CGbielefeld-CDS-genome-2	1216339..1217409		65	2.23429	1.53248	2.94931	104	2.57625	2.53246	3.84934	57	2.90195	2.09747	2.96359	39	2.26424	1.67836	2.42306	37	1.83985	1.08239	2.56342	40	2.19669	1.65515	2.28978
catA2	CGbielefeld-CDS-genome-2	1217420..1218307		62	2.57036	1.76299	2.81319	76	2.27062	2.23203	2.81298	60	3.68419	2.66287	3.11957	49	3.43107	2.54327	3.04436	52	3.1186	1.83469	3.60265	45	2.98055	2.24578	2.576
cg1312	CGbielefeld-CDS-genome-2	complement(1218369..1218842)		3379	262.437	180.003	153.319	3960	221.646	217.879	146.571	2630	302.539	218.67	136.741	1766	231.664	171.72	109.721	1749	196.508	115.607	121.174	1436	178.186	134.259	82.2029
cg1313	CGbielefeld-CDS-genome-2	complement(1218908..1219450)		93	6.30519	4.32467	4.21978	54	2.63838	2.59354	1.9987	67	6.72789	4.86279	3.48351	77	8.81734	6.53582	4.78399	46	4.51157	2.65418	3.18696	75	8.12379	6.12108	4.29333
putP	CGbielefeld-CDS-genome-2	complement(1219496..1221070)		1894	44.2705	30.3647	85.9384	2113	35.5928	34.9879	78.2083	2422	83.849	60.6045	125.926	2034	80.3003	59.5223	126.372	1451	49.0632	28.8642	100.528	1765	65.9115	49.6628	101.036
cg1316	CGbielefeld-CDS-genome-2	1221363..1224467		905	10.7301	7.35965	41.0635	1072	9.15961	9.00393	39.6778	874	15.3481	11.0933	45.4417	741	14.839	10.9993	46.0382	623	10.6855	6.28635	43.1625	1076	20.3821	15.3574	61.595
cg1317	CGbielefeld-CDS-genome-2	1224460..1225314		299	12.8742	8.83029	13.5668	402	12.4739	12.2619	14.8792	318	20.2799	14.6579	16.5337	302	21.9628	16.2798	18.7632	233	14.5131	8.53811	16.1426	454	31.2311	23.5319	25.989
cg1318	CGbielefeld-CDS-genome-2	1225355..1226530		274	8.57745	5.8832	12.4325	346	7.80571	7.67304	12.8065	3520	163.207	117.963	183.014	4451	235.341	174.446	276.54	152	6.88344	4.04956	10.5308	221	11.0531	8.32821	12.651
cg1319	CGbielefeld-CDS-genome-2	1226534..1229164		678	9.48689	6.50697	30.7636	855	8.62162	8.47509	31.646	8065	167.143	120.808	419.322	9433	222.934	165.249	586.07	436	8.82541	5.19204	30.2068	581	12.9883	9.78638	33.259
lipP	CGbielefeld-CDS-genome-2	1229331..1230107		45	2.1321	1.46238	2.04183	69	2.35598	2.31594	2.55389	657	46.1051	33.3239	34.1592	948	75.8637	56.2337	58.899	33	2.26184	1.33065	2.2863	30	2.2709	1.71107	1.71733
atoE	CGbielefeld-CDS-genome-2	1230186..1230566		6	0.579751	0.397646	0.272244	3	0.208901	0.20535	0.111039	8	1.1449	0.827515	0.415942	17	2.77441	2.05652	1.05621	4	0.559119	0.328933	0.277127	2	0.308747	0.232633	0.114489
cg1322	CGbielefeld-CDS-genome-2	complement(1230645..1231184)		295	20.1115	13.7943	13.3853	311	15.2795	15.0198	11.511	229	23.1231	16.7129	11.9063	183	21.0719	15.6195	11.3697	238	23.4721	13.8088	16.489	403	43.8943	33.0733	23.0695
cg1324	CGbielefeld-CDS-genome-2	1231463..1231951		227	17.0896	11.7216	10.2999	418	22.6783	22.2929	15.4714	188	20.963	15.1516	9.77464	142	18.0562	13.3841	8.82243	167	18.1877	10.6999	11.57	323	38.85	29.2725	18.4899
cg1325	CGbielefeld-CDS-genome-2	1232087..1232302		243	41.416	28.4068	11.0259	637	78.2401	76.9103	23.5772	224	56.5456	40.8701	11.6464	166	47.786	35.4212	10.3135	209	51.5302	30.3155	14.4799	262	71.3419	53.7544	14.998
cg1326	CGbielefeld-CDS-genome-2	complement(1232379..1232801)		1743	151.695	104.046	79.0869	1916	120.171	118.128	70.9167	1628	209.854	151.679	84.6442	1345	197.71	146.552	83.5646	1210	152.34	89.6225	83.8308	1892	263.074	198.22	108.306
cg1327	CGbielefeld-CDS-genome-2	1233198..1233950		651	31.8274	21.8301	29.5385	800	28.1863	27.7073	29.6103	764	55.3226	39.9861	39.7225	1054	87.0347	64.5142	65.4848	1977	139.824	82.2591	136.97	3951	308.61	232.53	226.173
cg1328	CGbielefeld-CDS-genome-2	1234071..1234307		161	25.0088	17.1533	7.30522	174	19.478	19.147	6.44024	129	29.6787	21.4512	6.70707	212	55.6204	41.2285	13.1715	420	94.3779	55.523	29.0983	460	114.158	86.0154	26.3324
ctpC	CGbielefeld-CDS-genome-2	1234475..1236352		212	4.15581	2.85043	9.61929	236	3.33396	3.27729	8.73504	183	5.31324	3.84031	9.51467	168	5.56238	4.12309	10.4378	157	4.45219	2.61924	10.8772	138	4.32196	3.25649	7.89973
cg1330	CGbielefeld-CDS-genome-2	1236451..1237083		134	7.79321	5.34529	6.08012	252	10.5619	10.3823	9.32725	117	10.0783	7.28439	6.08315	85	8.34953	6.18906	5.28103	77	6.47823	3.81118	5.33469	82	7.61917	5.74086	4.69404
tRNA_3552	CGbielefeld-CDS-genome-2	complement(1237864..1237936)		0	0	0	0	0	0	0	0	0	0	0	0	0	0	0	0	0	0	0	0	0	0	0	0
cg1332	CGbielefeld-CDS-genome-2	complement(1238010..1239593)		1458	33.8858	23.2419	66.1553	2349	39.3434	38.6747	86.9433	1124	38.6915	27.9655	58.4399	895	35.1329	26.0422	55.6062	639	21.484	12.6391	44.271	844	31.339	23.6132	48.3143
argS	CGbielefeld-CDS-genome-2	1239742..1241394		10994	244.849	167.94	498.842	11245	180.481	177.413	416.21	8795	290.113	209.688	457.276	7349	276.441	204.911	456.592	4766	153.55	90.3344	330.197	6326	225.089	169.599	362.128
lysA	CGbielefeld-CDS-genome-2	1241397..1242734		9270	255.058	174.942	420.617	9496	188.29	185.09	351.474	7856	320.147	231.396	408.455	6707	311.687	231.037	416.704	5508	219.234	128.976	381.604	8042	353.513	266.363	460.359
cg1335	CGbielefeld-CDS-genome-2	complement(1243019..1243624)		96	5.83195	4.00008	4.35591	200	8.75591	8.60709	7.40258	120	10.7972	7.80404	6.23913	85	8.72154	6.46481	5.28103	76	6.67898	3.92928	5.26541	78	7.57041	5.70412	4.46506
cg1336	CGbielefeld-CDS-genome-2	complement(1243621..1243743)		0	0	0	0	0	0	0	0	0	0	0	0	0	0	0	0	0	0	0	0	0	0	0	0
hom	CGbielefeld-CDS-genome-2	1243975..1245312		4405	121.201	83.1304	199.873	4070	80.7016	79.3299	150.642	3212	130.895	94.6085	167.001	2665	123.848	91.8017	165.576	2150	85.5759	50.3448	148.956	2473	108.709	81.9096	141.565
thrB	CGbielefeld-CDS-genome-2	1245323..1246252		2794	110.601	75.8601	126.775	2846	81.1887	79.8088	105.339	2602	152.556	110.264	135.285	2194	146.69	108.733	136.313	1763	100.958	59.3938	122.144	1824	115.356	86.9178	104.414
cg1340	CGbielefeld-CDS-genome-2	complement(1246308..1247000)		581	30.8644	21.1696	26.3623	1123	42.9923	42.2615	41.5655	412	32.4167	23.4301	21.421	564	50.6049	37.5107	35.0412	659	50.6432	29.7937	45.6566	781	66.285	49.9441	44.7079
narI	CGbielefeld-CDS-genome-2	complement(1247185..1247964)		254	11.9882	8.2226	11.525	296	10.0679	9.89683	10.9558	264	18.455	13.3389	13.7261	261	20.8062	15.4225	16.2159	296	20.21	11.8897	20.5074	310	23.3757	17.613	17.7458
narJ	CGbielefeld-CDS-genome-2	complement(1247973..1248659)		220	11.7891	8.08604	9.98229	262	10.1179	9.94588	9.69738	281	22.3025	16.1198	14.61	255	23.0797	17.1078	15.8431	339	26.2792	15.4602	23.4865	399	34.1597	25.7385	22.8405
narH	CGbielefeld-CDS-genome-2	complement(1248664..1250259)		660	15.2239	10.4419	29.9469	687	11.42	11.2259	25.4279	808	27.6047	19.9521	42.0101	681	26.5314	19.6663	42.3104	902	30.0984	17.707	62.4921	1083	39.911	30.072	61.9957
narG	CGbielefeld-CDS-genome-2	complement(1250259..1254005)		1346	13.2244	9.0705	61.0734	1520	10.7623	10.5793	56.2596	1943	28.2744	20.4362	101.022	1716	28.4761	21.1078	106.615	1948	27.6869	16.2884	134.961	2824	44.328	33.4001	161.658
narK	CGbielefeld-CDS-genome-2	complement(1254022..1255359)		406	11.1708	7.66196	18.4219	520	10.3108	10.1355	19.2467	723	29.4636	21.2958	37.5908	740	34.3892	25.4909	45.976	1388	55.2462	32.5016	96.163	2086	91.6971	69.0916	119.412
mog	CGbielefeld-CDS-genome-2	1255617..1256105		29	2.18325	1.49747	1.31585	64	3.47228	3.41326	2.36883	50	5.57526	4.02969	2.59964	48	6.1035	4.5242	2.98223	65	7.07903	4.16463	4.50331	135	16.2376	12.2347	7.72799
cg1347	CGbielefeld-CDS-genome-2	complement(1256202..1258070)		2932	57.7524	39.6118	133.037	3021	42.883	42.1541	111.816	2037	59.4273	42.9529	105.909	1760	58.5531	43.4023	109.348	2019	57.5303	33.8454	139.88	2065	64.9842	48.9641	118.21
cg1348	CGbielefeld-CDS-genome-2	complement(1258316..1259326)		427	15.5486	10.6647	19.3747	636	16.6897	16.4061	23.5402	340	18.3372	13.2537	17.6775	187	11.501	8.52511	11.6183	283	14.9075	8.77016	19.6067	357	20.7689	15.6489	20.4362
cg1349	CGbielefeld-CDS-genome-2	complement(1259330..1260733)		977	25.6178	17.571	44.3304	1486	28.0799	27.6026	55.0012	684	26.564	19.1999	35.563	569	25.1995	18.679	35.3518	662	25.1108	14.7728	45.8645	729	30.5392	23.0106	41.7312
mob	CGbielefeld-CDS-genome-2	complement(1260894..1261457)		127	8.28972	5.68584	5.7625	158	7.43227	7.30595	5.84804	131	12.6647	9.15384	6.81105	128	14.1116	10.4602	7.95261	111	10.4813	6.16618	7.69027	186	19.3968	14.6151	10.6475
moeA3	CGbielefeld-CDS-genome-2	complement(1261458..1262669)		162	4.92071	3.37507	7.35059	226	4.94709	4.863	8.36491	154	6.92823	5.00759	8.00688	178	9.13196	6.76904	11.0591	142	6.23958	3.67077	9.838	284	13.782	10.3844	16.2574
moaA	CGbielefeld-CDS-genome-2	complement(1263153..1264361)		477	14.5247	9.96236	21.6434	661	14.505	14.2585	24.4655	1201	54.1653	39.1496	62.4433	1367	70.3054	52.1137	84.9314	1182	52.0668	30.6311	81.891	1342	65.2865	49.1918	76.822
fadD4	CGbielefeld-CDS-genome-2	complement(1264351..1266078)		1383	29.4641	20.2092	62.7523	1405	21.5713	21.2047	52.0031	4424	139.597	100.898	230.016	5572	200.5	148.62	346.187	982	30.2648	17.8049	68.0346	1261	42.9209	32.3399	72.1852
rho	CGbielefeld-CDS-genome-2	1266610..1268898		16035	257.892	176.886	727.573	18461	213.97	210.333	683.295	14631	348.524	251.906	760.706	11378	309.077	229.102	706.913	7127	165.817	97.5513	493.771	7738	198.829	149.813	442.957
prfA	CGbielefeld-CDS-genome-2	1268898..1269974		8924	305.042	209.225	404.918	8489	209.115	205.56	314.202	8272	418.793	302.695	430.084	8026	463.372	343.473	498.654	7001	346.189	203.665	485.041	7900	431.428	325.071	452.231
cg1356	CGbielefeld-CDS-genome-2	1269975..1270814		2217	97.1631	66.6433	100.594	2093	66.1049	64.9814	77.468	1804	117.101	84.6385	93.7949	1701	125.913	93.3329	105.683	1425	90.3452	53.1505	98.7264	1747	122.324	92.168	100.006
cg1358	CGbielefeld-CDS-genome-2	1270864..1271514		2394	135.381	92.8567	108.625	2763	112.601	110.688	102.267	1973	165.253	119.442	102.582	1485	141.838	105.137	92.2627	1188	97.1863	57.1752	82.3066	1303	117.723	88.7013	74.5894
cg1359	CGbielefeld-CDS-genome-2	1271515..1272663		3980	127.52	87.4648	180.589	4053	93.5837	91.9931	150.013	3507	166.426	120.289	182.339	2888	156.287	115.848	179.431	2846	131.912	77.6045	197.176	2770	141.794	106.838	158.567
cg1360	CGbielefeld-CDS-genome-2	1272720..1273169		4603	376.568	258.285	208.857	6436	379.444	372.994	238.215	2887	349.815	252.84	150.103	1781	246.092	182.415	110.653	1535	181.662	106.873	106.347	1148	150.047	113.057	65.7166
cg1361	CGbielefeld-CDS-genome-2	1273348..1273590		73	11.0594	7.58554	3.3123	85	9.28018	9.12245	3.1461	38	8.52671	6.16294	1.97572	30	7.67647	5.69016	1.86389	23	5.0407	2.96547	1.59348	42	10.1658	7.65966	2.40426
atpB	CGbielefeld-CDS-genome-2	1273652..1274620		149465	5678.46	3894.81	6781.83	183372	5020.57	4935.24	6787.13	110053	6192.73	4475.99	5721.96	79755	5117.77	3793.53	4955.16	90695	4984.58	2932.46	6283.5	93399	5669.12	4271.55	5346.57
atpE	CGbielefeld-CDS-genome-2	1274754..1274996		31918	4835.54	3316.65	1448.25	30939	3377.88	3320.46	1145.14	26629	5975.2	4318.76	1384.52	20046	5129.42	3802.17	1245.45	20107	4406.67	2592.47	1393.05	23314	5642.97	4251.84	1334.6
atpF	CGbielefeld-CDS-genome-2	1275027..1275593		66358	4308.49	2955.15	3010.93	83061	3886.49	3820.44	3074.33	49474	4757.71	3438.78	2572.29	35936	3940.88	2921.17	2232.7	41669	3913.81	2302.51	2886.9	43885	4552.29	3430.04	2512.17
atpH	CGbielefeld-CDS-genome-2	1275599..1276414		109891	4957.78	3400.49	4986.2	93587	3042.77	2991.05	3463.93	84925	5674.79	4101.63	4415.48	72296	5508.97	4083.51	4491.73	84370	5506.39	3239.44	5845.3	118241	8522.66	6421.62	6768.63
atpA	CGbielefeld-CDS-genome-2	1276476..1278119		200442	4488.51	3078.63	9094.86	233043	3760.78	3696.86	8625.6	147600	4895.41	3538.31	7674.13	107376	4061.18	3010.34	6671.25	124659	4038.23	2375.71	8636.59	142695	5105.1	3846.57	8168.49
atpG	CGbielefeld-CDS-genome-2	1278176..1279153		113850	4285.58	2939.44	5165.83	92249	2502.46	2459.92	3414.4	87815	4895.92	3538.68	4565.74	69671	4429.55	3283.39	4328.64	89805	4890.25	2876.96	6221.84	120278	7233.44	5450.22	6885.24
atpD	CGbielefeld-CDS-genome-2	1279156..1280607		173039	4387.25	3009.17	7851.48	179640	3282.31	3226.53	6649	124679	4681.99	3384.06	6482.4	97441	4172.74	3093.03	6053.99	116951	4289.5	2523.54	8102.56	155181	6285.93	4736.29	8883.24
atpC	CGbielefeld-CDS-genome-2	1280619..1280993		70763	6946.89	4764.8	3210.8	40486	2864.29	2815.61	1498.5	61113	8886.01	6422.64	3177.43	51744	8579.76	6359.72	3214.84	85520	12145.2	7145.1	5924.97	92106	14446.2	10884.9	5272.55
cg1370	CGbielefeld-CDS-genome-2	1281238..1281711		4423	343.521	235.618	200.689	3852	215.601	211.937	142.574	2535	291.611	210.771	131.802	1827	239.666	177.652	113.511	1562	175.498	103.246	108.218	1529	189.726	142.954	87.5267
cg1371	CGbielefeld-CDS-genome-2	1281738..1282430		1378	73.2034	50.2095	62.5254	1879	71.9345	70.7119	69.5472	1109	87.2575	63.068	57.66	712	63.8842	47.354	44.2364	577	44.3417	26.0864	39.9755	679	57.628	43.4213	38.8689
cg1372	CGbielefeld-CDS-genome-2	1282435..1282722		236	30.1672	20.6914	10.7083	164	15.1076	14.8508	6.07012	149	28.2097	20.3894	7.74692	187	40.3734	29.9267	11.6183	141	26.0733	15.3391	9.76872	182	37.1686	28.0057	10.4185
cg1373	CGbielefeld-CDS-genome-2	complement(1282727..1283182)		192	15.5007	10.6318	8.71181	341	19.8396	19.5024	12.6214	163	19.4907	14.0875	8.47482	160	21.8173	16.172	9.94076	107	12.4965	7.35175	7.41314	182	23.4749	17.6878	10.4185
cg1374	CGbielefeld-CDS-genome-2	1283271..1283576		21	2.52646	1.73288	0.952855	107	9.27697	9.11929	3.96038	9	1.60371	1.15913	0.467935	6	1.2192	0.903731	0.372779	14	2.43655	1.43344	0.969944	5	0.96105	0.724128	0.286222
cg1375	CGbielefeld-CDS-genome-2	1283662..1284585		1849	73.6682	50.5283	83.8966	1756	50.4192	49.5623	64.9946	1518	89.5785	64.7457	78.925	1383	93.0672	68.9858	85.9255	1175	67.7229	39.8417	81.406	1522	96.8813	72.9977	87.126
ssuD1	CGbielefeld-CDS-genome-2	1284792..1285937		18	0.578233	0.396605	0.816732	13	0.300956	0.29584	0.481168	3	0.142738	0.103169	0.155978	8	0.434062	0.321747	0.497038	7	0.325299	0.191375	0.484972	8	0.410585	0.309366	0.457955
ssuC	CGbielefeld-CDS-genome-2	1285985..1286755		15	0.716229	0.491255	0.68061	19	0.653797	0.642685	0.703245	8	0.56577	0.408928	0.415942	5	0.403239	0.298899	0.310649	4	0.276296	0.162547	0.277127	8	0.610285	0.459835	0.457955
ssuB	CGbielefeld-CDS-genome-2	1286770..1287501		24	1.20702	0.827885	1.08898	29	1.05107	1.0332	1.07337	15	1.11734	0.80759	0.779891	11	0.93439	0.692614	0.683428	19	1.38233	0.813232	1.31635	19	1.52665	1.1503	1.08764
ssuA	CGbielefeld-CDS-genome-2	1287511..1288470		105	4.02655	2.76177	4.76427	98	2.70831	2.66228	3.62726	77	4.37345	3.16104	4.00344	112	7.25427	5.3772	6.95854	56	3.10661	1.82763	3.87977	67	4.10488	3.09293	3.83537
glgB	CGbielefeld-CDS-genome-2	complement(1288746..1290941)		2779	46.5877	31.9541	126.094	3087	37.2948	36.6609	114.259	2453	60.9073	44.0226	127.538	2091	59.2064	43.8865	129.913	2178	52.8196	31.074	150.896	2585	69.235	52.1669	147.977
glgE	CGbielefeld-CDS-genome-2	complement(1290979..1293006)		2699	48.9948	33.6051	122.464	2859	37.4016	36.7659	105.82	2629	70.6849	51.0897	136.689	2304	70.6417	52.3629	143.147	2702	70.9556	41.7436	187.199	3275	94.9819	71.5666	187.475
cg1383	CGbielefeld-CDS-genome-2	1293167..1294048		118	4.92525	3.37819	5.35414	166	4.99325	4.90838	6.14414	114	7.04759	5.09386	5.92717	141	9.94025	7.36818	8.7603	95	5.7362	3.37464	6.58176	385	25.6738	19.3446	22.0391
cg1384	CGbielefeld-CDS-genome-2	1294696..1295496		36	1.65457	1.13485	1.63346	222	7.35299	7.22802	8.21686	19	1.29338	0.934829	0.987862	31	2.40644	1.78377	1.92602	34	2.26056	1.3299	2.35558	32	2.34971	1.77045	1.83182
cg1385	CGbielefeld-CDS-genome-2	1295514..1296677		698	22.0759	15.1416	31.6711	840	19.1456	18.8202	31.0908	570	26.7009	19.2989	29.6359	498	26.6025	19.719	30.9406	412	18.8501	11.0896	28.5441	439	22.1824	16.7139	25.1303
fixA	CGbielefeld-CDS-genome-2	1296903..1297691		1664	77.6411	53.2533	75.5024	2139	71.9246	70.7021	79.1706	959	66.2744	47.9019	49.8611	782	61.6278	45.6814	48.5855	804	54.2686	31.9265	55.7025	961	71.638	53.9775	55.0119
fixB	CGbielefeld-CDS-genome-2	1297721..1298674		1894	73.0881	50.1305	85.9384	2217	61.654	60.6061	82.0576	1304	74.5304	53.8692	67.7986	949	61.8535	45.8487	58.9612	795	44.3801	26.109	55.0789	1162	71.6399	53.979	66.518
nifS1	CGbielefeld-CDS-genome-2	1298680..1299810		2781	90.5219	62.0881	126.185	3353	78.6529	77.3161	124.104	1931	93.0945	67.2869	100.398	1756	96.5403	71.5602	109.1	1628	76.6587	45.0987	112.791	1697	88.2504	66.4945	97.1437
cg1389	CGbielefeld-CDS-genome-2	complement(1299807..1300121)		212	24.7765	16.994	9.61929	251	21.1401	20.7808	9.29024	144	24.9262	18.0162	7.48696	89	17.5682	13.0223	5.52955	85	14.3707	8.45435	5.88894	63	11.7632	8.86333	3.6064
cg1391	CGbielefeld-CDS-genome-2	complement(1300465..1301613)		85	2.72342	1.86797	3.85679	153	3.53277	3.47272	5.66297	75	3.55914	2.57248	3.89946	73	3.95048	2.92828	4.53547	81	3.75435	2.2087	5.61182	145	7.42242	5.59261	8.30044
cg1392	CGbielefeld-CDS-genome-2	complement(1301610..1301837)		26	4.19811	2.87944	1.17972	34	3.95629	3.88904	1.25844	29	6.93533	5.01273	1.50779	29	7.90879	5.86236	1.80176	31	7.24096	4.25989	2.14773	101	26.0546	19.6315	5.78168
cg1393	CGbielefeld-CDS-genome-2	1302020..1302526		173	12.5618	8.61605	7.84971	257	13.4483	13.2198	9.51231	156	16.7773	12.1263	8.11087	124	15.2076	11.2726	7.70409	169	17.752	10.4436	11.7086	240	27.842	20.9783	13.7387
cg1394	CGbielefeld-CDS-genome-2	complement(1302453..1303397)		561	21.8548	14.99	25.4548	634	17.7992	17.4967	23.4662	455	26.2533	18.9754	23.6567	408	26.8457	19.8993	25.349	458	25.8109	15.1847	31.731	446	27.7588	20.9156	25.531
cg1395	CGbielefeld-CDS-genome-2	complement(1303440..1304591)		107	3.41937	2.34532	4.85502	159	3.66175	3.59951	5.88505	60	2.8399	2.05263	3.11957	47	2.53683	1.88042	2.9201	47	2.17277	1.27825	3.25624	57	2.91018	2.19275	3.26293
cg1396	CGbielefeld-CDS-genome-2	1304767..1305165		4	0.369064	0.253138	0.181496	30	1.99477	1.96086	1.11039	6	0.819941	0.592638	0.311957	3	0.467514	0.346544	0.186389	2	0.266948	0.157047	0.138563	8	1.17927	0.888554	0.457955
cg1397	CGbielefeld-CDS-genome-2	1305297..1306394		5368	179.98	123.447	243.568	5312	128.351	126.17	196.613	3745	185.975	134.419	194.713	2592	146.784	108.803	161.04	2719	131.879	77.5852	188.377	2449	131.185	98.8447	140.192
cg1398	CGbielefeld-CDS-genome-2	1306400..1307392		2356	87.3456	59.9096	106.901	2969	79.324	77.9758	109.891	1758	96.5326	69.7719	91.4033	1281	80.2133	59.4579	79.5882	865	46.3913	27.2922	59.9287	775	45.9039	34.5875	44.3644
cg1399	CGbielefeld-CDS-genome-2	complement(1307389..1308852)		1776	44.6598	30.6318	80.5843	1724	31.2421	30.7111	63.8102	3831	142.684	103.129	199.184	4324	183.65	136.13	268.649	697	25.3549	14.9164	48.2893	864	34.7112	26.1541	49.4591
cg1400	CGbielefeld-CDS-genome-2	complement(1308927..1309640)		326	16.8087	11.5289	14.7919	397	14.7515	14.5008	14.6941	2065	157.698	113.981	107.365	2309	201.082	149.051	143.458	135	10.0694	5.9239	9.35303	205	16.887	12.724	11.7351
ligA	CGbielefeld-CDS-genome-2	1309798..1311840		2060	37.1205	25.4606	93.4705	2195	28.5043	28.0198	81.2433	24081	642.703	464.534	1252.04	26877	818.011	606.348	1669.86	873	22.757	13.3881	60.4829	1347	38.779	29.219	77.1082
cg1402	CGbielefeld-CDS-genome-2	complement(1311900..1312565)		782	43.2263	29.6485	35.4825	1006	40.0744	39.3933	37.235	910	74.5026	53.8491	47.3134	903	84.3063	62.4918	56.1032	504	40.3019	23.7098	34.918	842	74.3593	56.0279	48.1998
gatC	CGbielefeld-CDS-genome-2	1312788..1313087		949	116.456	79.8758	43.06	1053	93.1217	91.5389	38.9746	1368	248.639	179.711	71.1261	1075	222.81	165.157	66.7895	459	81.4818	47.9362	31.8003	654	128.219	96.6103	37.4378
gatA	CGbielefeld-CDS-genome-2	1313093..1314586		7008	172.687	118.444	317.981	7321	130.006	127.796	270.971	10226	373.215	269.753	531.678	9528	396.55	293.941	591.973	3822	136.242	80.1516	264.795	5382	211.88	159.647	308.089
cg1405	CGbielefeld-CDS-genome-2	1314738..1315589		299	12.9195	8.86139	13.5668	492	15.3204	15.06	18.2103	249	15.9354	11.5178	12.9462	191	13.9393	10.3324	11.8668	163	10.1887	5.99405	11.2929	148	10.2169	7.69819	8.47217
cg1408	CGbielefeld-CDS-genome-2	complement(1315935..1316249)		678	79.2381	54.3487	30.7636	666	56.0928	55.1395	24.6506	601	104.032	75.1926	31.2476	456	90.0121	66.7212	28.3312	676	114.289	67.237	46.8344	754	140.786	106.079	43.1623
pfkA	CGbielefeld-CDS-genome-2	1316523..1317554		2050	73.1289	50.1585	93.0168	1949	50.1044	49.2528	72.1381	2166	114.441	82.716	112.616	2136	128.697	95.3962	132.709	2454	126.638	74.5018	170.017	3206	182.718	137.674	183.526
cg1410	CGbielefeld-CDS-genome-2	1317806..1318915		1717	56.9459	39.0587	77.9072	1831	43.7632	43.0194	67.7706	3383	166.182	120.113	175.891	2336	130.857	96.9972	145.135	38	1.82318	1.07259	2.6327	40	2.1195	1.597	2.28978
cg1411	CGbielefeld-CDS-genome-2	1318902..1320476		3667	85.7128	58.7896	166.387	4129	69.5517	68.3696	152.826	9466	327.71	236.863	492.163	10346	408.45	302.762	642.795	103	3.48278	2.04894	7.13601	202	7.54342	5.68378	11.5634
cg1412	CGbielefeld-CDS-genome-2	1320473..1321447		2984	112.67	77.2795	135.396	2684	73.0334	71.7921	99.3426	6769	378.551	273.609	351.939	8128	518.353	384.228	504.991	102	5.57141	3.27769	7.06673	232	13.9953	10.5451	13.2807
cg1413	CGbielefeld-CDS-genome-2	1321469..1322413		3283	127.895	87.7221	148.963	2985	83.8024	82.378	110.483	7167	413.533	298.894	372.632	8493	558.825	414.227	527.668	136	7.66437	4.50899	9.42231	285	17.7382	13.3653	16.3147
cg1414	CGbielefeld-CDS-genome-2	1322420..1322791		624	61.7528	42.3557	28.3134	791	56.4127	55.4539	29.2772	1437	210.629	152.239	74.7136	1553	259.582	192.415	96.4875	33	4.72433	2.77935	2.2863	45	7.11487	5.36088	2.576
cg1417	CGbielefeld-CDS-genome-2	1322944..1323582		1027	59.1677	40.5826	46.5991	1315	54.597	53.669	48.672	880	75.0907	54.2741	45.7536	641	62.374	46.2346	39.8252	210	17.502	10.2965	14.5492	198	18.2248	13.7319	11.3344
cg1418	CGbielefeld-CDS-genome-2	1323861..1324877		386	13.9727	9.58377	17.5144	405	10.5652	10.3856	14.9902	266	14.2615	10.3079	13.8301	256	15.6518	11.6019	15.9052	350	18.3281	10.7825	24.2486	664	38.4012	28.9344	38.0103
cg1419	CGbielefeld-CDS-genome-2	1325001..1326008		425	15.5219	10.6463	19.284	547	14.397	14.1523	20.2461	304	16.4444	11.8857	15.8058	249	15.3598	11.3854	15.4703	395	20.8692	12.2775	27.3663	464	27.0741	20.3997	26.5614
gatB	CGbielefeld-CDS-genome-2	1326223..1327728		7065	172.704	118.456	320.567	7470	131.595	129.358	276.486	6848	247.938	179.205	356.046	5780	238.643	176.894	359.11	6206	219.46	129.11	429.962	8480	331.183	249.539	485.432
cg1421	CGbielefeld-CDS-genome-2	1327943..1328521		37	2.35255	1.61359	1.67884	40	1.83284	1.80169	1.48052	16	1.50677	1.08906	0.831884	26	2.79217	2.06969	1.61537	17	1.56365	0.919904	1.17779	26	2.64114	1.99004	1.48835
cg1423	CGbielefeld-CDS-genome-2	1328630..1329715		1321	44.7804	30.7145	59.9391	1418	34.641	34.0522	52.4843	1033	51.865	37.4871	53.7085	806	46.1479	34.207	50.0766	597	29.2761	17.2233	41.3612	447	24.2089	18.2408	25.5882
lysE	CGbielefeld-CDS-genome-2	complement(1329712..1330413)		1810	94.9198	65.1046	82.127	1236	46.7116	45.9177	45.7479	1380	107.188	77.4735	71.75	1304	115.501	85.615	81.0172	1164	88.305	51.9503	80.6439	532	44.573	33.5847	30.454
lysG	CGbielefeld-CDS-genome-2	1330484..1331356		195	8.2231	5.64015	8.84793	211	6.41227	6.30329	7.80972	194	12.1169	8.75787	10.0866	199	14.1738	10.5063	12.3638	104	6.34437	3.73243	7.2053	156	10.5101	7.91912	8.93012
cg1426	CGbielefeld-CDS-genome-2	complement(1331357..1332436)		224	7.63553	5.23714	10.1638	262	6.43608	6.32669	9.69738	215	10.8547	7.84559	11.1784	205	11.8026	8.74862	12.7366	113	5.57217	3.27813	7.82883	165	8.98582	6.7706	9.44532
cg1427	CGbielefeld-CDS-genome-2	1332571..1333347		669	31.6972	21.7408	30.3552	537	18.3357	18.024	19.8759	5333	374.244	270.496	277.277	4658	372.756	276.305	289.401	162	11.1036	6.5323	11.2236	240	18.1672	13.6885	13.7387
cg1429	CGbielefeld-CDS-genome-2	1333422..1334480		758	26.3505	18.0735	34.3935	706	17.6869	17.3863	26.1311	3049	156.988	113.468	158.526	2603	152.836	113.289	161.724	615	30.9278	18.195	42.6082	1267	70.3684	53.0209	72.5286
cg1431	CGbielefeld-CDS-genome-2	complement(1334654..1334893)		16	2.45428	1.68337	0.725984	14	1.54761	1.5213	0.518181	15	3.40788	2.46315	0.779891	10	2.59081	1.92043	0.621298	10	2.219	1.30545	0.692817	6	1.47041	1.10792	0.343466
ilvD	CGbielefeld-CDS-genome-2	complement(1334908..1336749)		9694	193.744	132.887	439.856	10708	154.228	151.606	396.334	8264	244.627	176.812	429.668	6751	227.89	168.923	419.438	5648	163.296	96.0676	391.303	5312	169.616	127.801	304.082
cg1433	CGbielefeld-CDS-genome-2	complement(1336878..1337486)		3204	193.682	132.845	145.378	3459	150.687	148.126	128.028	3227	288.926	208.83	167.781	2703	275.979	204.568	167.937	2904	253.95	149.4	201.194	3056	295.144	222.384	174.939
yggB	CGbielefeld-CDS-genome-2	complement(1337561..1339162)		593	13.6272	9.34678	26.9068	774	12.8181	12.6002	28.648	504	17.1543	12.3988	26.2043	350	13.5848	10.0697	21.7454	375	12.4663	7.334	25.9806	357	13.107	9.8758	20.4362
ilvB	CGbielefeld-CDS-genome-2	1339600..1341480		11416	223.429	153.248	517.99	11957	168.646	165.78	442.563	10724	310.865	224.688	557.57	7429	245.577	182.033	461.562	6256	177.124	104.203	433.426	5972	186.736	140.701	341.863
ilvN	CGbielefeld-CDS-genome-2	1341494..1342012		2163	153.428	105.235	98.144	2799	143.08	140.648	103.599	2355	247.416	178.828	122.443	1607	192.529	142.711	99.8426	1464	150.225	88.3783	101.428	1709	193.674	145.929	97.8307
ilvC	CGbielefeld-CDS-genome-2	1342193..1343209		13315	481.987	330.59	604.155	12492	325.878	320.339	462.365	13404	718.65	519.427	696.911	11120	679.877	503.957	690.883	8896	465.847	274.06	616.33	10851	627.547	472.841	621.159
cg1438	CGbielefeld-CDS-genome-2	complement(1343426..1343926)		31	2.27792	1.56241	1.40659	39	2.06524	2.03014	1.4435	33	3.59154	2.5959	1.71576	23	2.85454	2.11592	1.42898	24	2.55119	1.50088	1.66276	29	3.40453	2.56523	1.66009
cg1440	CGbielefeld-CDS-genome-2	complement(1343927..1344196)		9	1.22714	0.841683	0.408366	14	1.37565	1.35227	0.518181	7	1.41364	1.02175	0.363949	1	0.230294	0.170705	0.0621298	1	0.197245	0.11604	0.0692817	2	0.435676	0.328271	0.114489
cg1441	CGbielefeld-CDS-genome-2	complement(1344258..1345142)		25	1.03995	0.713291	1.13435	22	0.659513	0.648303	0.814284	22	1.35545	0.979694	1.14384	15	1.05389	0.781191	0.931947	17	1.023	0.601835	1.17779	16	1.06334	0.801205	0.91591
cg1442	CGbielefeld-CDS-genome-2	1345500..1345934		761	64.4037	44.1739	34.5296	645	39.3382	38.6696	23.8733	492	61.6709	44.5745	25.5804	472	67.4682	50.0106	29.3253	518	63.4176	37.3089	35.8879	507	68.5513	51.6518	29.0229
cg1443	CGbielefeld-CDS-genome-2	1345907..1346278		35	3.4637	2.37572	1.58809	42	2.99537	2.94446	1.55454	46	6.74247	4.87333	2.39167	37	6.18451	4.58425	2.2988	18	2.57691	1.51601	1.24707	31	4.90135	3.69305	1.77458
cg1444	CGbielefeld-CDS-genome-2	1346402..1346890		170	12.7984	8.77829	7.71358	354	19.2061	18.8796	13.1026	108	12.0426	8.70414	5.61522	63	8.01084	5.93801	3.91418	53	5.77213	3.39578	3.67193	60	7.21672	5.43762	3.43466
cg1447	CGbielefeld-CDS-genome-2	1346935..1347909		415	15.6696	10.7476	18.8302	475	12.9251	12.7054	17.5811	360	20.1327	14.5515	18.7174	330	21.0453	15.5998	20.5028	732	39.983	23.5222	50.7142	1411	85.1177	64.1341	80.7718
cg1448	CGbielefeld-CDS-genome-2	1347925..1349742		1281	25.94	17.792	58.1241	1690	24.6625	24.2433	62.5518	1278	38.3302	27.7043	66.4467	961	32.8682	24.3635	59.7067	1002	29.3524	17.2682	69.4202	1161	37.5609	28.3012	66.4607
cg1449	CGbielefeld-CDS-genome-2	1349927..1351546		1395	31.7011	21.7435	63.2968	1371	22.4526	22.071	50.7447	2947	99.1903	71.6929	153.223	3676	141.094	104.585	228.389	1095	35.9972	21.1773	75.8634	1341	48.6868	36.6843	76.7647
serA	CGbielefeld-CDS-genome-2	1352322..1353914		12606	291.324	199.817	571.985	12696	211.444	207.85	469.916	11954	409.168	295.739	621.521	11089	432.836	320.838	688.957	10078	336.921	198.212	698.221	14496	535.217	403.273	829.815
cg1452	CGbielefeld-CDS-genome-2	1354052..1354921		242	10.2403	7.0237	10.9805	277	8.44703	8.30346	10.2526	188	11.7826	8.51627	9.77464	215	15.3662	11.3901	13.3579	291	17.8132	10.4796	20.161	296	20.011	15.0778	16.9443
leuB	CGbielefeld-CDS-genome-2	1354956..1355978		1210	43.5437	29.8662	54.9026	1317	34.155	33.5745	48.746	1068	56.9246	41.144	55.5283	917	55.7366	41.3146	56.973	948	49.3517	29.0339	65.679	1146	65.888	49.645	65.6021
cg1454	CGbielefeld-CDS-genome-2	complement(1356004..1357068)		777	26.8588	18.4222	35.2556	1163	28.9717	28.4793	43.046	712	36.4531	26.3476	37.0188	506	29.5425	21.8983	31.4377	565	28.2532	16.6215	39.1442	559	30.8716	23.261	31.9996
cg1456	CGbielefeld-CDS-genome-2	1357156..1359024		494	9.73045	6.67402	22.4148	788	11.1856	10.9955	29.1662	513	14.9662	10.8173	26.6723	527	17.5327	12.996	32.7424	443	12.623	7.4262	30.6918	509	16.0179	12.0691	29.1374
dnaQ2	CGbielefeld-CDS-genome-2	1359087..1359680		124	7.68512	5.27115	5.62638	203	9.06678	8.91268	7.51362	112	10.281	7.43092	5.82319	118	12.3521	9.15599	7.33131	127	11.3864	6.69868	8.79877	175	17.328	13.0562	10.0178
cg1458	CGbielefeld-CDS-genome-2	1359726..1360532		2040	93.0619	63.8303	92.563	2708	89.0264	87.5133	100.231	1634	110.403	79.7975	84.9562	1255	96.6979	71.677	77.9729	1102	72.7239	42.7839	76.3484	1611	117.414	88.4685	92.2207
cg1459	CGbielefeld-CDS-genome-2	1360534..1361139		1434	87.1147	59.7512	65.0664	1497	65.538	64.424	55.4083	1330	119.669	86.4948	69.1504	1122	115.124	85.3355	69.7096	914	80.3236	47.2548	63.3235	1158	112.391	84.6843	66.289
entC	CGbielefeld-CDS-genome-2	complement(1361632..1362762)		589	19.172	13.1499	26.7253	813	19.0709	18.7468	30.0915	477	22.9964	16.6214	24.8005	320	17.5928	13.0406	19.8815	238	11.2069	6.59305	16.489	306	15.9131	11.9902	17.5168
gltS	CGbielefeld-CDS-genome-2	1362828..1364318		3688	91.0602	62.4573	167.339	3952	70.3207	69.1255	146.275	3183	116.403	84.1337	165.493	2910	121.356	89.9549	180.798	2422	86.5099	50.8942	167.8	4385	172.977	130.334	251.017
cg1464	CGbielefeld-CDS-genome-2	complement(1364390..1364605)		41	6.98788	4.79292	1.86034	67	8.22934	8.08947	2.47986	27	6.81576	4.9263	1.4038	21	6.04522	4.481	1.30473	23	5.67079	3.33615	1.59348	20	5.44595	4.10339	1.14489
cg1465	CGbielefeld-CDS-genome-2	complement(1364606..1365079)		73	5.66969	3.88879	3.3123	146	8.17181	8.03292	5.40388	65	7.4772	5.40438	3.37953	51	6.69019	4.95908	3.16862	50	5.61773	3.30494	3.46408	73	9.0582	6.82514	4.17884
cg1466	CGbielefeld-CDS-genome-2	complement(1365196..1365720)		589	41.302	28.3287	26.7253	425	21.477	21.112	15.7305	425	44.1402	31.9037	22.0969	478	56.6129	41.9641	29.698	484	49.0971	28.884	33.5323	935	104.749	78.9258	53.5235
cg1467	CGbielefeld-CDS-genome-2	complement(1365804..1366427)		31	1.82891	1.25443	1.40659	32	1.36053	1.33741	1.18441	18	1.57287	1.13684	0.93587	19	1.89328	1.40339	1.18047	8	0.682771	0.401677	0.554253	24	2.26216	1.70449	1.37387
cg1468	CGbielefeld-CDS-genome-2	complement(1366342..1366647)		2	0.240616	0.165036	0.0907481	1	0.0867006	0.085227	0.0370129	0	0	0	0	2	0.406401	0.301244	0.12426	3	0.522119	0.307165	0.207845	0	0	0	0
cg1469	CGbielefeld-CDS-genome-2	complement(1366681..1366863)		0	0	0	0	5	0.724874	0.712554	0.185064	0	0	0	0	1	0.339778	0.25186	0.0621298	0	0	0	0	0	0	0	0
tRNA_3553	CGbielefeld-CDS-genome-2	1367060..1367131		0	0	0	0	0	0	0	0	0	0	0	0	0	0	0	0	0	0	0	0	0	0	0	0
tRNA_3554	CGbielefeld-CDS-genome-2	1367170..1367242		0	0	0	0	0	0	0	0	0	0	0	0	0	0	0	0	0	0	0	0	0	0	0	0
tRNA_3555	CGbielefeld-CDS-genome-2	1367309..1367380		0	0	0	0	0	0	0	0	0	0	0	0	0	0	0	0	0	0	0	0	0	0	0	0
tRNA_3556	CGbielefeld-CDS-genome-2	1367418..1367490		0	0	0	0	0	0	0	0	0	0	0	0	0	0	0	0	0	0	0	0	0	0	0	0
cg1471	CGbielefeld-CDS-genome-2	1368634..1368756		0	0	0	0	0	0	0	0	0	0	0	0	0	0	0	0	0	0	0	0	0	0	0	0
tRNA_3557	CGbielefeld-CDS-genome-2	1369040..1369115		0	0	0	0	0	0	0	0	0	0	0	0	0	0	0	0	0	0	0	0	0	0	0	0
cg1474	CGbielefeld-CDS-genome-2	1369867..1371021		372	11.857	8.13263	16.8791	433	9.94603	9.77698	16.0266	266	12.5575	9.07634	13.8301	270	14.5354	10.7744	16.775	309	14.2477	8.38202	21.408	370	18.8416	14.1967	21.1804
cg1475	CGbielefeld-CDS-genome-2	1371018..1371344		219	24.6554	16.9109	9.93691	195	15.8209	15.552	7.21752	202	33.6828	24.3453	10.5025	183	34.7977	25.7937	11.3697	145	23.6151	13.8929	10.0458	248	44.6068	33.6102	14.1966
thiC	CGbielefeld-CDS-genome-2	complement(1371341..1373104)		232	4.84177	3.32093	10.5268	363	5.45949	5.36669	13.4357	164	5.06932	3.66401	8.52681	142	5.00537	3.71022	8.82243	125	3.77382	2.22016	8.66021	237	7.90218	5.95411	13.5669
cg1478	CGbielefeld-CDS-genome-2	1374140..1374601		445	35.4595	24.3214	20.1914	460	26.4155	25.9666	17.0259	339	40.0094	28.918	17.6255	334	44.9522	33.3207	20.7513	347	39.9997	23.532	24.0407	424	53.9785	40.6715	24.2716
glgP1	CGbielefeld-CDS-genome-2	complement(1374814..1377201)		3269	50.396	34.5661	148.328	3442	38.2402	37.5903	127.398	2742	62.6091	45.2527	142.564	2830	73.6883	54.6212	175.827	1723	38.4256	22.606	119.372	2626	64.6782	48.7334	150.324
cg1481	CGbielefeld-CDS-genome-2	complement(1377397..1377555)		0	0	0	0	0	0	0	0	0	0	0	0	1	0.391066	0.289876	0.0621298	1	0.334944	0.197049	0.0692817	3	1.10974	0.836163	0.171733
cg1482	CGbielefeld-CDS-genome-2	complement(1377613..1379022)		93	2.42817	1.66546	4.21978	86	1.61817	1.59066	3.18311	83	3.20969	2.3199	4.3154	77	3.39561	2.51699	4.78399	54	2.0396	1.1999	3.74121	114	4.75536	3.58305	6.52586
cg1483	CGbielefeld-CDS-genome-2	complement(1379130..1379882)		43	2.10227	1.44193	1.95108	45	1.58548	1.55853	1.66558	26	1.88271	1.36078	1.35181	32	2.64242	1.95868	1.98815	46	3.25336	1.91397	3.18696	104	8.12336	6.12076	5.95342
cg1484	CGbielefeld-CDS-genome-2	complement(1379930..1380409)		65	4.98525	3.41934	2.94931	87	4.80863	4.7269	3.22012	52	5.90699	4.26946	2.70362	72	9.32691	6.91354	4.47334	85	9.43077	5.54817	5.88894	206	25.242	19.0192	11.7923
cg1485	CGbielefeld-CDS-genome-2	1380470..1381036		121	7.85629	5.38856	5.49026	132	6.17639	6.07141	4.8857	133	12.7901	9.24442	6.91504	113	12.392	9.18554	7.02067	120	11.2711	6.63087	8.3138	235	24.3771	18.3676	13.4524
cg1486	CGbielefeld-CDS-genome-2	complement(1381019..1381726)		164	8.52758	5.84899	7.44134	249	9.33061	9.17202	9.21621	167	12.8614	9.29596	8.68279	180	15.8083	11.7179	11.1834	198	14.8937	8.76201	13.7178	441	36.6355	27.604	25.2448
leuC	CGbielefeld-CDS-genome-2	1381907..1383352		515	13.1116	8.99309	23.3676	632	11.5956	11.3985	23.3922	443	16.7047	12.0739	23.0328	364	15.6524	11.6023	22.6152	335	12.338	7.25853	23.2094	459	18.6699	14.0673	26.2752
leuD	CGbielefeld-CDS-genome-2	1383369..1383962		200	12.3953	8.50185	9.07481	305	13.6225	13.391	11.2889	184	16.8902	12.2079	9.56667	170	17.7955	13.1908	10.5621	152	13.6278	8.01732	10.5308	236	23.3681	17.6073	13.5097
cg1490	CGbielefeld-CDS-genome-2	complement(1384309..1385319)		1487	54.1471	37.139	67.4712	1953	51.2501	50.379	72.2862	1396	75.2902	54.4183	72.5819	1089	66.9766	49.6462	67.6593	1227	64.6343	38.0247	85.0086	1255	73.0113	55.0122	71.8417
cg1491	CGbielefeld-CDS-genome-2	1385397..1385555		1	0.231536	0.158808	0.045374	1	0.166858	0.164022	0.0370129	0	0	0	0	0	0	0	0	0	0	0	0	1	0.369914	0.278721	0.0572444
gpsA	CGbielefeld-CDS-genome-2	1385597..1386595		716	26.3853	18.0975	32.4878	850	22.5734	22.1897	31.461	449	24.5067	17.713	23.3447	405	25.2079	18.6853	25.1626	334	17.8053	10.475	23.1401	517	30.4384	22.9346	29.5953
ddlA	CGbielefeld-CDS-genome-2	1386620..1387702		2204	74.9201	51.387	100.004	2152	52.7178	51.8218	79.6518	1802	90.7257	65.5748	93.6909	1587	91.1161	67.5395	98.6	1472	72.385	42.5845	101.983	2345	127.354	95.958	134.238
cg1494	CGbielefeld-CDS-genome-2	complement(1387757..1388680)		3918	156.102	107.069	177.775	3463	99.4316	97.7416	128.176	2817	166.234	120.151	146.464	2027	136.404	101.109	125.937	2007	115.676	68.053	139.048	1181	75.1753	56.6428	67.6056
thiL	CGbielefeld-CDS-genome-2	1388877..1389794		522	20.9336	14.3581	23.6852	617	17.8314	17.5284	22.837	421	25.006	18.0738	21.8889	397	26.8902	19.9323	24.6655	496	28.7745	16.9282	34.3637	765	49.0135	36.9305	43.792
ung	CGbielefeld-CDS-genome-2	1389794..1390543		322	15.8056	10.8409	14.6104	382	13.5128	13.2831	14.1389	256	18.6116	13.4521	13.3101	256	21.2239	15.7322	15.9052	290	20.5924	12.1146	20.0917	290	22.7423	17.1358	16.6009
cg1497	CGbielefeld-CDS-genome-2	1390555..1392258		1417	30.6137	20.9976	64.295	2010	31.2947	30.7628	74.3959	1227	39.2626	28.3783	63.7951	1041	37.9864	28.1573	64.6771	979	30.5973	18.0005	67.8268	1269	43.8015	33.0034	72.6431
cg1498	CGbielefeld-CDS-genome-2	1392263..1394386		1565	27.1253	18.605	71.0104	1907	23.8199	23.415	70.5836	1497	38.4301	27.7765	77.8332	1175	34.3977	25.4972	73.0025	1340	33.5985	19.7662	92.8375	1648	45.6352	34.385	94.3387
cg1499	CGbielefeld-CDS-genome-2	1394406..1394621		296	50.4491	34.6025	13.4307	396	48.6391	47.8124	14.6571	328	82.7989	59.8454	17.0536	231	66.4974	49.291	14.352	245	60.4062	35.5373	16.974	287	78.1494	58.8837	16.4291
cg1500	CGbielefeld-CDS-genome-2	1394621..1395205		1813	114.092	78.255	82.2631	1596	72.3804	71.1502	59.0726	1552	144.657	104.555	80.6928	1387	147.424	109.277	86.174	1460	132.913	78.1932	101.151	1944	195.451	147.268	111.283
coaD	CGbielefeld-CDS-genome-2	1395209..1395691		840	64.0247	43.9139	38.1142	1116	61.3	60.2582	41.3064	764	86.2483	62.3386	39.7225	628	80.8461	59.9269	39.0175	615	67.8106	39.8933	42.6082	580	70.6282	53.2167	33.2017
cg1502	CGbielefeld-CDS-genome-2	complement(1396264..1397028)		2462	118.479	81.2637	111.711	2220	76.9902	75.6816	82.1686	2179	155.31	112.255	113.292	1887	153.376	113.689	117.239	1834	127.675	75.1121	127.063	1932	148.54	111.921	110.596
cg1503	CGbielefeld-CDS-genome-2	complement(1397032..1397982)		2782	107.694	73.8663	126.231	2715	75.7413	74.454	100.49	2291	131.356	94.9414	119.115	2113	138.155	102.407	131.28	1841	103.096	60.652	127.548	1876	116.024	87.4217	107.39
cg1504	CGbielefeld-CDS-genome-2	complement(1398025..1398939)		3163	127.26	87.2867	143.518	3012	87.3328	85.8485	111.483	2639	157.262	113.666	137.209	2124	144.338	106.99	131.964	1754	102.089	60.0593	121.52	1960	125.989	94.9296	112.199
cg1505	CGbielefeld-CDS-genome-2	1399129..1399938		174	7.90823	5.42418	7.89508	277	9.07274	8.91854	10.2526	124	8.3472	6.0332	6.4471	95	7.29265	5.40565	5.90233	100	6.57483	3.868	6.92817	83	6.02685	4.54109	4.75128
cg1506	CGbielefeld-CDS-genome-2	complement(1400021..1401001)		3820	143.354	98.3251	173.329	3745	101.281	99.5593	138.613	2217	123.226	89.0651	115.268	1587	100.59	74.562	98.6	1280	69.4881	40.8802	88.6806	1119	67.0901	50.5508	64.0565
int1	CGbielefeld-CDS-genome-2	complement(1401649..1402329)		0	0	0	0	0	0	0	0	74	5.92501	4.28248	3.84746	59	5.38706	3.99314	3.66566	32	2.50249	1.47223	2.21701	43	3.7138	2.79826	2.46151
cg1508	CGbielefeld-CDS-genome-2	1402348..1402803		0	0	0	0	0	0	0	0	60	7.17448	5.18558	3.11957	31	4.22711	3.13333	1.92602	26	3.03653	1.78641	1.80132	54	6.96508	5.24802	3.0912
cg1509	CGbielefeld-CDS-genome-2	1402800..1403546		0	0	0	0	0	0	0	0	351	25.6207	18.5181	18.2495	307	25.5543	18.9421	19.0738	191	13.617	8.01096	13.2328	304	23.9359	18.0351	17.4023
cg1510	CGbielefeld-CDS-genome-2	1403739..1404173		0	0	0	0	0	0	0	0	381	47.7573	34.5181	19.8092	341	48.7429	36.1306	21.1863	351	42.9722	25.2807	24.3179	350	47.3234	35.6571	20.0355
cg1511	CGbielefeld-CDS-genome-2	1404595..1405461		0	0	0	0	0	0	0	0	700	44.0234	31.8192	36.3949	506	36.2893	26.8993	31.4377	468	28.7472	16.9121	32.4238	458	31.0702	23.4106	26.2179
cg1512	CGbielefeld-CDS-genome-2	1405464..1405685		0	0	0	0	0	0	0	0	191	46.9121	33.9072	9.93062	109	30.5295	22.6299	6.77215	120	28.7871	16.9356	8.3138	111	29.4081	22.1583	6.35413
tnp23a(ISCg23a)	CGbielefeld-CDS-genome-2	complement(1406158..1406352)		0	0	0	0	0	0	0	0	4	1.11848	0.808419	0.207971	3	0.956606	0.709081	0.186389	1	0.273108	0.160671	0.0692817	2	0.603244	0.45453	0.114489
cg4005	CGbielefeld-CDS-genome-2	complement(1406334..1406768)		0	0	0	0	0	0	0	0	157	19.6795	14.224	8.16286	127	18.1535	13.4562	7.89048	105	12.8549	7.56262	7.27458	89	12.0337	9.06708	5.09475
cg1514	CGbielefeld-CDS-genome-2	complement(1406784..1407536)		0	0	0	0	0	0	0	0	186	13.4686	9.73484	9.67065	157	12.9644	9.6098	9.75438	117	8.27485	4.86814	8.10596	136	10.6229	8.00407	7.78524
tnp24a(ISCg24a)	CGbielefeld-CDS-genome-2	complement(1408463..1408576)		0	0	0	0	0	0	0	0	0	0	0	0	0	0	0	0	0	0	0	0	0	0	0	0
cg1516	CGbielefeld-CDS-genome-2	complement(1408631..1409002)		0	0	0	0	0	0	0	0	68	9.96713	7.20405	3.53551	52	8.69175	6.44273	3.23075	34	4.86749	2.86357	2.35558	62	9.80271	7.38611	3.54915
cg1517	CGbielefeld-CDS-genome-2	complement(1409023..1409328)		0	0	0	0	0	0	0	0	62	11.0478	7.98512	3.22355	46	9.34723	6.92861	2.85797	49	8.52794	5.01703	3.3948	82	15.7612	11.8757	4.69404
cg4006	CGbielefeld-CDS-genome-2	1409624..1409920		0	0	0	0	0	0	0	0	80	14.6872	10.6156	4.15942	69	14.4457	10.7078	4.28695	55	9.86224	5.80201	3.81049	85	16.8329	12.6832	4.86577
cg1518	CGbielefeld-CDS-genome-2	complement(1410167..1410490)		0	0	0	0	0	0	0	0	62	10.434	7.5415	3.22355	74	14.2015	10.5268	4.5976	90	14.7934	8.70301	6.23535	150	27.2297	20.517	8.58666
cg1519	CGbielefeld-CDS-genome-2	complement(1410892..1411269)		0	0	0	0	0	0	0	0	80	11.5399	8.34083	4.15942	56	9.21177	6.82819	3.47927	67	9.43957	5.55335	4.64187	90	14.0039	10.5516	5.15199
cg1520	CGbielefeld-CDS-genome-2	complement(1411528..1412478)		0	0	0	0	0	0	0	0	78	4.47217	3.2324	4.05543	54	3.53069	2.61711	3.35501	44	2.464	1.44959	3.04839	67	4.14373	3.1222	3.83537
cg1521	CGbielefeld-CDS-genome-2	complement(1412583..1412891)		0	0	0	0	0	0	0	0	16	2.82336	2.04067	0.831884	13	2.61596	1.93907	0.807687	19	3.27465	1.92649	1.31635	11	2.09378	1.57761	0.629688
cg1522	CGbielefeld-CDS-genome-2	complement(1412901..1413467)		0	0	0	0	0	0	0	0	35	3.36581	2.43274	1.81975	32	3.50924	2.60122	1.98815	36	3.38134	1.98926	2.49414	34	3.5269	2.65743	1.94631
cg1523	CGbielefeld-CDS-genome-2	1413818..1414042		0	0	0	0	0	0	0	0	34	8.2395	5.95535	1.76775	28	7.73788	5.73568	1.73963	45	10.6512	6.26617	3.11768	35	9.14919	6.8937	2.00355
cg1524	CGbielefeld-CDS-genome-2	complement(1414090..1414383)		0	0	0	0	0	0	0	0	94	17.4335	12.6006	4.88732	101	21.361	15.8337	6.27511	74	13.4046	7.88599	5.12684	210	42.0116	31.6547	12.0213
tRNA_3558	CGbielefeld-CDS-genome-2	complement(1415032..1415108)		0	0	0	0	0	0	0	0	0	0	0	0	0	0	0	0	0	0	0	0	0	0	0	0
polA	CGbielefeld-CDS-genome-2	1415287..1417929		3133	43.6394	29.9318	142.157	3495	35.0828	34.4865	129.36	2460	50.7507	36.6817	127.902	2051	48.252	35.7666	127.428	1982	39.937	23.4952	137.316	2938	65.3811	49.2631	168.184
cg1526	CGbielefeld-CDS-genome-2	complement(1417926..1419326)		399	10.4846	7.19126	18.1042	567	10.7371	10.5546	20.9863	329	12.8045	9.25484	17.1056	303	13.4478	9.96814	18.8253	319	12.1261	7.13386	22.1009	396	16.6247	12.5263	22.6688
cg1527	CGbielefeld-CDS-genome-2	1419363..1420340		229	8.62009	5.91244	10.3907	323	8.76208	8.61316	11.9552	202	11.262	8.13998	10.5025	184	11.6984	8.67139	11.4319	162	8.82156	5.18977	11.2236	220	13.2306	9.96898	12.5938
dkgX	CGbielefeld-CDS-genome-2	1420343..1421218		167	7.01823	4.81374	7.57746	274	8.29832	8.15728	10.1415	142	8.8387	6.38845	7.38297	145	10.2923	7.6291	9.00882	148	8.99761	5.29334	10.2537	126	8.45987	6.37431	7.21279
cg1530	CGbielefeld-CDS-genome-2	complement(1421535..1422314)		86	4.059	2.78403	3.90217	135	4.5918	4.51375	4.99674	74	5.17299	3.73894	3.84746	63	5.02218	3.72268	3.91418	41	2.79936	1.64688	2.84055	100	7.54054	5.68162	5.72444
rpsA	CGbielefeld-CDS-genome-2	1422566..1424026		275086	6931.6	4754.32	12481.8	272129	4941.61	4857.62	10072.3	223838	8353.87	6038.02	11638	187923	7997.91	5928.42	11675.6	134989	4920.59	2894.81	9352.27	197473	7949.77	5989.96	11304.2
ptsG	CGbielefeld-CDS-genome-2	1424684..1426735		5450	97.7765	67.064	247.288	4803	62.0982	61.0427	177.773	8039	213.614	154.396	417.97	9701	293.958	217.896	602.721	3779	98.0774	57.6994	261.815	4141	118.693	89.4323	237.049
cg1538	CGbielefeld-CDS-genome-2	1426746..1427348		505	30.8311	21.1468	22.9139	541	23.8026	23.398	20.024	391	35.356	25.5547	20.3292	282	29.0789	21.5547	17.5206	302	26.6722	15.6914	20.9231	324	31.6028	23.8119	18.5472
cg1540	CGbielefeld-CDS-genome-2	1427739..1428824		156	5.28822	3.62714	7.07835	238	5.81421	5.71539	8.80907	151	7.58143	5.47972	7.85091	121	6.92791	5.13529	7.5177	77	3.77599	2.22143	5.33469	103	5.57834	4.20314	5.89617
cg1541	CGbielefeld-CDS-genome-2	complement(1428840..1429277)		73	6.1357	4.20842	3.3123	140	8.48004	8.3359	5.18181	69	8.58972	6.20849	3.5875	72	10.2213	7.57649	4.47334	36	4.37721	2.57514	2.49414	28	3.75994	2.83303	1.60284
cg1542	CGbielefeld-CDS-genome-2	complement(1429268..1429516)		79	11.68	8.0112	3.58455	90	9.5893	9.42632	3.33116	86	18.8323	13.6116	4.47138	73	18.2293	13.5124	4.53547	17	3.63596	2.13905	1.17779	12	2.83452	2.13574	0.686933
iunH3	CGbielefeld-CDS-genome-2	complement(1429688..1430626)		5447	213.554	146.474	247.152	8630	243.831	239.687	319.421	6688	388.36	280.699	347.728	6218	411.748	305.207	386.323	239	13.5551	7.97452	16.5583	477	29.8779	22.5123	27.3056
cg1545	CGbielefeld-CDS-genome-2	complement(1430658..1432109)		9235	234.145	160.598	419.029	11224	205.081	201.595	415.433	12808	480.971	347.637	665.923	13796	590.79	437.921	857.142	489	17.9354	10.5515	33.8787	929	37.6311	28.3541	53.18
rbsK1	CGbielefeld-CDS-genome-2	complement(1432123..1433046)		5121	204.032	139.944	232.36	6404	183.875	180.75	237.031	7114	419.804	303.426	369.876	8099	545.012	403.988	503.189	255	14.6973	8.6465	17.6668	601	38.256	28.825	34.4039
ccpA1	CGbielefeld-CDS-genome-2	complement(1433039..1434079)		1864	65.919	45.2132	84.5772	2832	72.1749	70.9482	104.821	2648	138.698	100.249	137.677	2874	171.665	127.246	178.561	153	7.82727	4.60482	10.6001	360	20.3399	15.3256	20.608
cg1548	CGbielefeld-CDS-genome-2	1434283..1435017		68	3.40594	2.3361	3.08543	181	6.53334	6.42229	6.69933	82	6.08318	4.39681	4.26341	48	4.0607	3.00998	2.98223	23	1.66652	0.980421	1.59348	26	2.08057	1.56766	1.48835
cg1549	CGbielefeld-CDS-genome-2	1435067..1435399		18	1.98996	1.36489	0.816732	55	4.3819	4.30742	2.03571	36	5.89471	4.26058	1.87174	19	3.54777	2.62978	1.18047	12	1.91914	1.12904	0.83138	5	0.883127	0.665415	0.286222
uvrB	CGbielefeld-CDS-genome-2	1435509..1437671		2235	38.0396	26.091	101.411	2689	32.9821	32.4215	99.5277	13810	348.13	251.622	718.02	14554	418.382	310.124	904.237	1743	42.9151	25.2472	120.758	1745	47.45	35.7524	99.8915
uspA1	CGbielefeld-CDS-genome-2	1437802..1438245		5656	468.966	321.66	256.635	6580	393.176	386.493	243.545	4231	519.594	375.553	219.981	3724	521.523	386.577	231.371	3713	445.36	262.008	257.243	5309	703.278	529.903	303.91
cg1552	CGbielefeld-CDS-genome-2	complement(1438333..1438716)		234	22.4336	15.387	10.6175	315	21.7632	21.3933	11.6591	192	27.263	19.7052	9.98261	166	26.8796	19.9245	10.3135	182	25.2412	14.8495	12.6093	236	36.1475	27.2363	13.5097
cg1553	CGbielefeld-CDS-genome-2	1438823..1439671		167	7.24142	4.96682	7.57746	181	5.65607	5.55993	6.69933	147	9.44091	6.82371	7.64294	131	9.59423	7.11169	8.139	134	8.40556	4.94503	9.28375	321	22.2379	16.7558	18.3754
cg1555	CGbielefeld-CDS-genome-2	complement(1439676..1441943)		583	9.46326	6.49076	26.4531	752	8.79667	8.64716	27.8337	476	11.4437	8.27132	24.7486	337	9.23918	6.84851	20.9377	335	7.86631	4.62779	23.2094	439	11.3846	8.57804	25.1303
cg1556	CGbielefeld-CDS-genome-2	complement(1442139..1443053)		2073	83.4052	57.2069	94.0604	3073	89.1015	87.5871	113.741	2211	131.756	95.2311	114.956	1860	126.397	93.6918	115.561	1764	102.671	60.4017	122.213	2272	146.044	110.041	130.059
cg1559	CGbielefeld-CDS-genome-2	complement(1443257..1443859)		215	13.1261	9.00308	9.75542	369	16.235	15.9591	13.6578	193	17.452	12.6139	10.0346	129	13.3021	9.86011	8.01474	130	11.4814	6.75458	9.00662	125	12.1924	9.1867	7.15555
uvrA	CGbielefeld-CDS-genome-2	1443954..1446803		3643	47.0576	32.2763	165.298	3984	37.0867	36.4564	147.459	3032	58.0081	41.9271	157.642	2565	55.9615	41.4813	159.363	2602	48.6219	28.6045	180.271	3575	73.7783	55.5902	204.649
cg1562	CGbielefeld-CDS-genome-2	complement(1446787..1448913)		469	8.11747	5.56769	21.2804	538	6.71056	6.5965	19.9129	427	10.9462	7.91173	22.2009	432	12.6288	9.36108	26.8401	328	8.21251	4.83146	22.7244	485	13.4113	10.1051	27.7635
infC	CGbielefeld-CDS-genome-2	1449259..1449828		68129	4400.2	3018.06	3091.29	94337	4390.87	4316.24	3491.69	47595	4552.93	3290.77	2474.6	34994	3817.38	2829.62	2174.17	26302	2457.44	1445.73	1822.25	29088	3001.49	2261.55	1665.12
rpmI	CGbielefeld-CDS-genome-2	1449857..1450051		36428	6877.27	4717.05	1652.89	19435	2644.2	2599.25	719.346	24687	6903	4989.36	1283.55	22651	7222.7	5353.8	1407.3	15656	4275.78	2515.46	1084.67	25229	7609.62	5733.66	1444.22
rplT	CGbielefeld-CDS-genome-2	1450112..1450495		17756	1702.27	1167.57	805.661	43589	3011.55	2960.36	1613.36	14405	2045.44	1478.4	748.956	9830	1591.73	1179.86	610.736	7869	1091.33	642.037	545.178	8339	1277.26	962.386	477.361
cg1566	CGbielefeld-CDS-genome-2	complement(1450583..1451395)		257	11.6374	7.98202	11.6611	250	8.15818	8.01952	9.25322	138	9.25535	6.68959	7.175	152	11.6252	8.61713	9.44373	74	4.84742	2.85176	5.12684	113	8.17495	6.15963	6.46862
cg1567	CGbielefeld-CDS-genome-2	1451671..1452162		69	5.16296	3.54123	3.13081	114	6.14729	6.0428	4.21947	1083	120.024	86.751	56.3082	1079	136.365	101.08	67.038	21	2.27313	1.33729	1.45492	34	4.06454	3.06253	1.94631
ugpA	CGbielefeld-CDS-genome-2	1452358..1453290		137	5.40573	3.70774	6.21624	150	4.26534	4.19284	5.55193	2169	126.76	91.6197	112.772	2021	134.689	99.8376	125.564	63	3.59607	2.11559	4.36475	83	5.23231	3.94242	4.75128
ugpE	CGbielefeld-CDS-genome-2	1453287..1454123		32	1.40747	0.965372	1.45197	47	1.48976	1.46444	1.73961	420	27.3608	19.7758	21.837	351	26.0752	19.3282	21.8076	21	1.33617	0.786078	1.45492	9	0.632433	0.476523	0.515199
ugpB	CGbielefeld-CDS-genome-2	1454225..1455541		85	2.37601	1.62968	3.85679	65	1.3094	1.28714	2.40584	635	26.2901	19.002	33.0154	520	24.5507	18.1981	32.3075	38	1.53662	0.904003	2.6327	45	2.00967	1.51424	2.576
ugpC	CGbielefeld-CDS-genome-2	1455582..1456808		99	2.97034	2.03733	4.49203	95	2.05411	2.01919	3.51623	716	31.818	22.9974	37.2268	770	39.0205	28.9238	47.8399	76	3.29867	1.94062	5.26541	61	2.92404	2.20319	3.49191
glpQ2	CGbielefeld-CDS-genome-2	complement(1456814..1457521)		55	2.85986	1.96155	2.49557	82	3.07273	3.0205	3.03506	75	5.77607	4.17483	3.89946	68	5.97203	4.42675	4.22483	30	2.25661	1.32758	2.07845	41	3.40603	2.56636	2.34702
tsnR	CGbielefeld-CDS-genome-2	1457570..1458418		1377	59.7092	40.954	62.48	1387	43.3424	42.6057	51.3369	1251	80.3441	58.0712	65.0429	1127	82.5397	61.1823	70.0203	1143	71.6981	42.1804	79.189	1598	110.705	83.4134	91.4765
pheS	CGbielefeld-CDS-genome-2	1458499..1459536		3699	131.19	89.9823	167.839	4254	108.729	106.881	157.453	2842	149.29	107.904	147.763	2153	128.971	95.5996	133.765	1759	90.2481	53.0934	121.866	2069	117.236	88.3344	118.439
pheT	CGbielefeld-CDS-genome-2	1459579..1462086		8443	123.932	85.004	383.093	8517	90.0954	88.5641	315.239	6551	142.424	102.942	340.605	5382	133.433	98.9067	334.382	5639	119.741	70.4444	390.679	7335	172.016	129.61	419.888
cg1577	CGbielefeld-CDS-genome-2	1462624..1463598		8628	325.777	223.448	391.487	8406	228.733	224.845	311.13	6545	366.024	264.555	340.293	4495	286.663	212.488	279.273	3837	209.583	123.299	265.834	3166	190.987	143.904	181.236
cg1578	CGbielefeld-CDS-genome-2	1463601..1464986		12326	327.397	224.558	559.28	12173	233.012	229.052	450.558	8700	342.263	247.381	452.337	6113	274.244	203.283	379.799	6030	231.699	136.309	417.769	4811	204.159	153.829	275.403
cg1579	CGbielefeld-CDS-genome-2	1465000..1465404		2868	260.699	178.811	130.133	3354	219.711	215.977	124.141	2313	311.404	225.077	120.259	1715	263.303	195.172	106.553	1883	247.608	145.669	130.457	1984	288.127	217.097	113.573
argC	CGbielefeld-CDS-genome-2	1465520..1466593		1550	53.1303	36.4416	70.3297	1557	38.4617	37.808	57.6291	1459	74.0722	53.538	75.8574	1312	75.9585	56.304	81.5143	1189	58.9586	34.6856	82.3759	1216	66.5927	50.176	69.6092
argJ	CGbielefeld-CDS-genome-2	1466677..1467843		1328	41.8931	28.7341	60.2567	1389	31.5773	31.0406	51.4109	1262	58.9648	42.6186	65.6149	1138	60.6343	44.945	70.7037	953	43.4902	25.5855	66.0254	1126	56.7499	42.7597	64.4572
argB	CGbielefeld-CDS-genome-2	1467889..1468842		860	33.1868	22.7625	39.0217	1083	30.1178	29.6059	40.085	842	48.1247	34.7836	43.7779	832	54.2277	40.1962	51.692	701	39.1326	23.0219	48.5665	789	48.6436	36.6518	45.1658
argD	CGbielefeld-CDS-genome-2	1468843..1470018		1828	57.2248	39.2499	82.9437	1970	44.4429	43.6876	72.9154	1598	74.0924	53.5526	83.0844	1384	73.1771	54.2423	85.9876	1443	65.3474	38.4442	99.9735	1720	86.0238	64.8168	98.4603
argF	CGbielefeld-CDS-genome-2	1470032..1470991		1106	42.413	29.0907	50.1837	1142	31.5601	31.0237	42.2687	932	52.9357	38.2609	48.4572	855	55.3785	41.0492	53.121	911	50.5378	29.7317	63.1156	987	60.4705	45.563	56.5002
argR	CGbielefeld-CDS-genome-2	1470995..1471510		354	25.2562	17.323	16.0624	485	24.9365	24.5127	17.9513	267	28.2141	20.3926	13.8821	199	23.98	17.7751	12.3638	241	24.8735	14.6332	16.6969	260	29.6361	22.3301	14.8835
argG	CGbielefeld-CDS-genome-2	1471678..1472883		4362	133.154	91.3289	197.921	4381	96.3762	94.7381	162.154	4193	189.575	137.021	218.006	3757	193.705	143.583	233.422	3388	149.612	88.0173	234.726	5371	261.942	197.367	307.46
argH	CGbielefeld-CDS-genome-2	1472944..1474377		2917	74.8863	51.3638	132.356	3015	55.7804	54.8324	111.594	2822	107.303	77.5566	146.724	2491	108.012	80.0634	154.765	2337	86.7918	51.0601	161.911	3147	129.076	97.2555	180.148
cg1589	CGbielefeld-CDS-genome-2	1474444..1475589		664	21.3304	14.6303	30.1284	702	16.2516	15.9754	25.9831	686	32.6395	23.5912	35.667	689	37.3836	27.7105	42.8074	574	26.6745	15.6928	39.7677	768	39.4161	29.6991	43.9637
cg1590	CGbielefeld-CDS-genome-2	1475586..1477163		561	13.0879	8.97689	25.4548	673	11.3149	11.1226	24.9097	569	19.6612	14.2107	29.5839	524	20.6477	15.305	32.556	468	15.7946	9.29204	32.4238	409	15.2445	11.4864	23.413
cg1591	CGbielefeld-CDS-genome-2	1477150..1477764		272	16.282	11.1677	12.3417	376	16.2202	15.9445	13.9168	233	20.6578	14.9311	12.1143	200	20.2209	14.9887	12.426	207	17.9252	10.5455	14.3413	233	22.2832	16.7899	13.3379
cg1592	CGbielefeld-CDS-genome-2	1477810..1477989		188	38.4504	26.3727	8.53032	253	37.2899	36.6561	9.36426	163	49.3764	35.6883	8.47482	140	48.3618	35.848	8.69817	105	31.0661	18.2763	7.27458	162	52.9346	39.885	9.27359
tyrS	CGbielefeld-CDS-genome-2	1478017..1479279		4367	127.29	87.3072	198.148	5271	110.722	108.84	195.095	4098	176.918	127.873	213.066	3599	177.184	131.337	223.605	3557	149.986	88.2374	246.435	4643	216.218	162.915	265.786
uspA2	CGbielefeld-CDS-genome-2	complement(1479393..1479860)		2203	173.294	118.861	99.959	1831	103.797	102.033	67.7706	2698	314.34	227.199	140.276	2140	284.325	210.755	132.958	1773	201.759	118.696	122.836	1406	176.7	133.139	80.4856
16S rRNA copy F	CGbielefeld-CDS-genome-2	1480831..1482354		405	9.7833	6.71027	18.3765	6270	109.151	107.295	232.071	86	3.07693	2.22395	4.47138	642	26.1937	19.416	39.8873	83	2.90043	1.70634	5.75038	809	31.222	23.525	46.3107
23S rRNA copy F	CGbielefeld-CDS-genome-2	1482745..1485830		1454573	17352.2	11901.7	65999.8	3239494	27850	27376.6	119903	1079496	19073.5	13785.9	56126	1080430	21769.4	16136.5	67126.9	1094966	18896.2	11116.7	75861.1	1373514	26177.9	19724.4	78626
5S rRNA copy F	CGbielefeld-CDS-genome-2	1485943..1486062		1	0.306785	0.210421	0.045374	1	0.221087	0.217329	0.0370129	0	0	0	0	2	1.03632	0.768172	0.12426	2	0.887602	0.522181	0.138563	2	0.980271	0.738611	0.114489
cg1597	CGbielefeld-CDS-genome-2	1486811..1487497		2611	139.915	95.9666	118.472	3345	129.176	126.981	123.808	2350	186.516	134.81	122.183	2118	191.697	142.095	131.591	1608	124.652	73.3333	111.405	1844	157.871	118.952	105.559
cg1598	CGbielefeld-CDS-genome-2	1487509..1488495		2156	80.4168	55.1571	97.8264	3154	84.779	83.3381	116.739	2027	111.98	80.9371	105.389	1502	94.6236	70.1394	93.3189	1052	56.7633	33.3942	72.8843	1193	71.092	53.5661	68.2926
cg1599	CGbielefeld-CDS-genome-2	1488499..1488663		23	5.13167	3.51977	1.0436	49	7.87872	7.74481	1.81363	30	9.91383	7.16553	1.55978	13	4.89898	3.63136	0.807687	11	3.55041	2.08872	0.762099	13	4.63401	3.49161	0.744177
cg1600	CGbielefeld-CDS-genome-2	1488705..1489526		1532	68.6123	47.0605	69.513	1347	43.475	42.7361	49.8564	1294	85.8354	62.0402	67.2786	1266	95.7654	70.9858	78.6563	1037	67.1856	39.5256	71.8451	1479	105.826	79.7376	84.6644
ppnK	CGbielefeld-CDS-genome-2	1489526..1490488		1324	50.6147	34.7162	60.0752	1627	44.8234	44.0616	60.22	1056	59.7918	43.2164	54.9043	930	60.0487	44.5109	57.7807	954	52.7584	31.038	66.0947	1153	70.4207	53.0603	66.0028
recN	CGbielefeld-CDS-genome-2	1490570..1492351		373	7.70577	5.28532	16.9245	416	6.1934	6.08814	15.3974	350	10.7094	7.74054	18.1975	338	11.7939	8.74216	20.9999	262	7.83002	4.60644	18.1518	379	12.5092	9.42537	21.6956
cg1603	CGbielefeld-CDS-genome-2	1492411..1493604		304	9.37312	6.42894	13.7937	281	6.24375	6.13763	10.4006	263	12.0103	8.68085	13.6741	348	18.1226	13.4334	21.6212	228	10.1695	5.98277	15.7962	981	48.3239	36.4109	56.1567
cg1604	CGbielefeld-CDS-genome-2	1493614..1494579		356	13.5671	9.30557	16.1532	307	8.4315	8.2882	11.363	319	18.006	13.0144	16.5857	354	22.7862	16.8902	21.9939	229	12.6249	7.42729	15.8655	978	59.5469	44.8672	55.985
pyrG	CGbielefeld-CDS-genome-2	1494980..1496644		3036	67.1278	46.0424	137.756	3444	54.8773	53.9446	127.472	2585	84.6546	61.1867	134.401	1757	65.6152	48.637	109.162	2147	68.6732	40.4008	148.748	2042	72.1338	54.3511	116.893
cg1607	CGbielefeld-CDS-genome-2	1496654..1497331		1291	70.099	48.0802	58.5779	1348	52.7477	51.8512	49.8934	3885	312.439	225.825	201.992	4444	407.559	302.102	276.105	1097	86.1681	50.6931	76.002	1243	107.83	81.2472	71.1548
xerD	CGbielefeld-CDS-genome-2	1497328..1498242		823	33.1126	22.7117	37.3428	955	27.6902	27.2196	35.3473	2915	173.709	125.553	151.559	3412	231.865	171.869	211.987	617	35.9115	21.1269	42.7468	539	34.6469	26.1056	30.8547
cg1609	CGbielefeld-CDS-genome-2	complement(1498259..1499791)		580	13.9284	9.55335	26.3169	600	10.3837	10.2072	22.2077	1158	41.188	29.7699	60.2076	1210	49.0783	36.3792	75.177	269	9.345	5.49771	18.6368	318	12.2006	9.19288	18.2037
parA2	CGbielefeld-CDS-genome-2	1500243..1501115		959	40.4408	27.738	43.5137	1255	38.1393	37.4911	46.4512	814	50.841	36.7469	42.3221	679	48.3618	35.848	42.1861	658	40.1403	23.6148	45.5873	1154	77.7479	58.5812	66.06
cg1611	CGbielefeld-CDS-genome-2	1501398..1502165		472	22.6254	15.5185	21.4165	602	20.796	20.4425	22.2818	421	29.8899	21.6039	21.8889	273	22.1028	16.3837	16.9614	270	18.7228	11.0147	18.7061	300	22.9751	17.3112	17.1733
cg1612	CGbielefeld-CDS-genome-2	complement(1502375..1502938)		374	24.4122	16.7441	16.9699	248	11.6658	11.4676	9.1792	214	20.689	14.9536	11.1264	232	25.5773	18.9591	14.4141	104	9.82027	5.77732	7.2053	144	15.0169	11.3149	8.24319
sseA2	CGbielefeld-CDS-genome-2	1503177..1504046		232	9.81712	6.73347	10.5268	275	8.38604	8.24351	10.1785	301	18.8648	13.6351	15.6498	382	27.3018	20.2373	23.7336	275	16.8338	9.90343	19.0525	428	28.9349	21.8017	24.5006
cg1614	CGbielefeld-CDS-genome-2	1504131..1504646		516	36.8142	25.2505	23.413	594	30.5408	30.0217	21.9857	434	45.8611	33.1475	22.5649	347	41.8145	30.9948	21.559	238	24.5639	14.451	16.489	315	35.9053	27.0538	18.032
cg1615	CGbielefeld-CDS-genome-2	1504746..1505708		4686	179.139	122.87	212.623	6157	169.624	166.741	227.888	3409	193.021	139.512	177.243	2451	158.257	117.308	152.28	1218	67.3582	39.6272	84.3851	1588	96.9888	73.0787	90.9041
cmk	CGbielefeld-CDS-genome-2	1505705..1506415		5683	294.255	201.826	257.861	4712	175.825	172.836	174.405	4066	311.819	225.377	211.403	3750	327.95	243.092	232.987	1555	116.474	68.5224	107.733	3027	250.403	188.673	173.279
cg1617	CGbielefeld-CDS-genome-2	1506412..1508043		22562	508.947	349.082	1023.73	16911	274.911	270.239	625.925	17734	592.503	428.25	922.04	18114	690.146	511.568	1125.42	11671	380.853	224.058	808.587	19651	708.21	533.619	1124.91
cg1618	CGbielefeld-CDS-genome-2	complement(1508126..1508794)		278	15.298	10.4927	12.614	352	13.9592	13.7219	13.0285	230	18.7459	13.5492	11.9583	152	14.1275	10.4719	9.44373	139	11.0652	6.5097	9.63015	144	12.66	9.53901	8.24319
cg1619	CGbielefeld-CDS-genome-2	complement(1508869..1509369)		485	35.6385	24.4441	22.0064	679	35.9564	35.3452	25.1318	356	38.7451	28.0042	18.5094	227	28.1731	20.8832	14.1035	274	29.1261	17.135	18.9832	295	34.6323	26.0946	16.8871
cg1620	CGbielefeld-CDS-genome-2	complement(1509381..1510196)		492	22.1968	15.2246	22.324	603	19.6052	19.272	22.3188	428	28.5995	20.6711	22.2529	342	26.0605	19.3173	21.2484	298	19.4489	11.4419	20.6459	334	24.0743	18.1394	19.1196
cg1621	CGbielefeld-CDS-genome-2	1510280..1511836		664	15.6998	10.7684	30.1284	801	13.6486	13.4166	29.6473	494	17.2999	12.504	25.6844	400	15.9742	11.8408	24.8519	300	10.2613	6.03677	20.7845	366	13.8258	10.4174	20.9514
cg1622	CGbielefeld-CDS-genome-2	1511833..1513602		728	15.1417	10.3855	33.0323	837	12.5457	12.3325	30.9798	552	17.0047	12.2907	28.7	503	17.6702	13.098	31.2513	533	16.037	9.43465	36.9271	630	20.9346	15.7737	36.064
cg1623	CGbielefeld-CDS-genome-2	1513641..1514447		758	34.5789	23.7173	34.3935	664	21.8292	21.4582	24.5766	477	32.2292	23.2946	24.8005	360	27.738	20.5607	22.3667	350	23.0974	13.5883	24.2486	556	40.5227	30.5329	31.8279
cg1624	CGbielefeld-CDS-genome-2	complement(1514444..1515994)		875	20.7688	14.2451	39.7023	1286	21.9975	21.6236	47.5986	790	27.7728	20.0736	41.0743	883	35.3994	26.2397	54.8606	828	28.4307	16.7259	57.3652	1017	38.5662	29.0587	58.2175
cg1625	CGbielefeld-CDS-genome-2	complement(1516438..1516626)		11	2.14262	1.46961	0.499114	53	7.43974	7.31329	1.96168	9	2.59648	1.87669	0.467935	13	4.27689	3.17023	0.807687	14	3.9449	2.3208	0.969944	12	3.73436	2.81375	0.686933
tRNA_3559	CGbielefeld-CDS-genome-2	complement(1516690..1516766)		0	0	0	0	0	0	0	0	0	0	0	0	0	0	0	0	0	0	0	0	0	0	0	0
cg1626	CGbielefeld-CDS-genome-2	complement(1516872..1517261)		1236	116.673	80.0247	56.0823	1290	87.7544	86.2629	47.7466	777	108.633	78.5177	40.3984	659	105.067	77.8808	40.9435	448	61.1762	35.9903	31.0382	600	90.4865	68.1794	34.3466
cg1628	CGbielefeld-CDS-genome-2	complement(1517263..1518465)		3017	92.3262	63.3257	136.893	5056	111.503	109.607	187.137	1772	80.316	58.0509	92.1312	1541	79.6496	59.04	95.742	1440	63.748	37.5032	99.7656	1902	92.9913	70.0667	108.879
secA2	CGbielefeld-CDS-genome-2	1518637..1520928		2135	34.2924	23.5209	96.8735	2566	29.702	29.1972	94.9751	1927	45.8428	33.1343	100.19	1627	44.1387	32.7177	101.085	1437	33.3896	19.6433	99.5578	2069	53.0937	40.0048	118.439
cg1630	CGbielefeld-CDS-genome-2	1521068..1521499		3818	325.362	223.163	173.238	5164	317.136	311.746	191.135	3452	435.704	314.918	179.479	2691	387.326	287.104	167.191	3272	403.366	237.302	226.69	5805	790.343	595.505	332.304
cg1631	CGbielefeld-CDS-genome-2	1521657..1522415		2507	121.598	83.4032	113.753	2851	99.655	97.9612	105.524	2274	163.363	118.075	118.232	1958	160.405	118.9	121.65	1873	131.421	77.3158	129.765	2813	217.984	164.246	161.028
cg1632	CGbielefeld-CDS-genome-2	1522424..1523059		1302	75.3649	51.6921	59.077	1473	61.4454	60.401	54.52	1246	106.823	77.2097	64.783	874	85.4478	63.3379	54.3014	755	63.2207	37.1931	52.3077	847	78.3292	59.0192	48.486
cg1633	CGbielefeld-CDS-genome-2	1523238..1523813		2201	140.674	96.4867	99.8682	3041	140.068	137.687	112.556	2004	189.705	137.115	104.193	1653	178.442	132.27	102.701	1677	155.053	91.2184	116.185	2179	222.501	167.649	124.736
cg1635	CGbielefeld-CDS-genome-2	complement(1523896..1524408)		596	42.7705	29.3359	27.0429	606	31.34	30.8073	22.4298	564	59.9468	43.3284	29.3239	610	73.9365	54.8052	37.8992	810	84.0886	49.4697	56.1182	1434	164.41	123.879	82.0884
cg1636	CGbielefeld-CDS-genome-2	complement(1524516..1525967)		2335	59.2019	40.606	105.948	2406	43.9615	43.2143	89.053	1865	70.0352	50.6201	96.9665	1436	61.4942	45.5824	89.2184	1266	46.434	27.3174	87.7106	1410	57.115	43.0347	80.7146
cg1638	CGbielefeld-CDS-genome-2	complement(1526032..1526925)		2146	88.3705	60.6125	97.3727	2351	69.7684	68.5826	87.0173	1476	90.0229	65.0668	76.7413	1009	70.1779	52.0191	62.6889	711	42.3547	24.9175	49.2593	765	50.3293	37.922	43.792
cg1639	CGbielefeld-CDS-genome-2	complement(1526937..1528001)		1187	41.0314	28.143	53.859	1274	31.7368	31.1974	47.1544	840	43.0065	31.0843	43.6739	693	40.4604	29.9912	43.0559	720	36.0041	21.1814	49.8828	842	46.5007	35.0372	48.1998
cg1640	CGbielefeld-CDS-genome-2	complement(1527998..1529380)		2049	54.5425	37.4102	92.9714	3182	61.041	60.0035	117.775	1880	74.1208	53.5731	97.7464	1477	66.4056	49.223	91.7657	1442	55.5281	32.6674	99.9042	1377	58.5611	44.1244	78.8255
cg1641	CGbielefeld-CDS-genome-2	complement(1529451..1530797)		3686	100.74	69.0968	167.249	3974	78.2716	76.9412	147.089	2703	109.416	79.0841	140.536	2201	101.601	75.3116	136.748	1541	60.9262	35.8432	106.763	1613	70.431	53.0681	92.3352
cg1642	CGbielefeld-CDS-genome-2	1530953..1531690		26	1.29698	0.889584	1.17972	32	1.15037	1.13082	1.18441	36	2.65981	1.92246	1.87174	12	1.01105	0.749436	0.745557	15	1.08244	0.636806	1.03923	14	1.11576	0.840695	0.801421
gnd	CGbielefeld-CDS-genome-2	complement(1531805..1533283)		2659	66.1859	45.3963	120.65	3331	59.7517	58.7361	123.29	2483	91.5404	66.1637	129.098	2036	85.5965	63.4482	126.496	1945	70.0359	41.2025	134.753	2029	80.6884	60.7968	116.149
cg1644	CGbielefeld-CDS-genome-2	1533400..1533864		294	23.2761	15.9648	13.34	495	28.242	27.762	18.3214	183	21.4586	15.5099	9.51467	157	20.9939	15.5617	9.75438	129	14.7743	8.69178	8.93734	179	22.6411	17.0595	10.2467
cg1645	CGbielefeld-CDS-genome-2	1533882..1534466		277	17.4317	11.9562	12.5686	384	17.4148	17.1188	14.213	213	19.8531	14.3494	11.0745	179	19.0258	14.1028	11.1212	203	18.4803	10.8721	14.0642	186	18.7006	14.0904	10.6475
cg1646	CGbielefeld-CDS-genome-2	1534508..1535251		440	21.7718	14.9331	19.9646	521	18.5784	18.2626	19.2837	413	30.2678	21.877	21.473	413	34.5163	25.5851	25.6596	638	45.6685	26.867	44.2017	763	60.3183	45.4484	43.6775
cg1647	CGbielefeld-CDS-genome-2	1535248..1535991		262	12.9641	8.89198	11.888	298	10.6264	10.4458	11.0298	225	16.4897	11.9185	11.6984	213	17.8014	13.1952	13.2336	428	30.6366	18.0237	29.6526	486	38.4203	28.9488	27.8208
cg1648	CGbielefeld-CDS-genome-2	complement(1535993..1536874)		294	12.2714	8.41683	13.34	307	9.2345	9.07755	11.363	215	13.2915	9.60685	11.1784	175	12.3372	9.1449	10.8727	165	9.96288	5.86121	11.4315	189	12.6035	9.49642	10.8192
pctD	CGbielefeld-CDS-genome-2	complement(1536846..1537694)		104	4.50963	3.09311	4.7189	102	3.1874	3.13322	3.77532	56	3.59654	2.59951	2.91159	33	2.41687	1.7915	2.05028	37	2.32094	1.36542	2.56342	66	4.57229	3.44511	3.77813
pctC	CGbielefeld-CDS-genome-2	complement(1537691..1538497)		69	3.14768	2.15896	3.13081	94	3.09028	3.03776	3.47921	62	4.18912	3.02781	3.22355	32	2.4656	1.82762	1.98815	34	2.24375	1.32001	2.35558	54	3.93566	2.96543	3.0912
pctB	CGbielefeld-CDS-genome-2	complement(1538494..1539300)		92	4.19691	2.87862	4.17441	118	3.87929	3.81336	4.36752	66	4.45938	3.22316	3.43152	60	4.623	3.42679	3.72779	69	4.5535	2.67884	4.78044	74	5.39331	4.06373	4.23608
pctA	CGbielefeld-CDS-genome-2	complement(1539334..1540386)		142	4.9645	3.4051	6.44311	140	3.52731	3.46736	5.18181	84	4.34966	3.14385	4.36739	80	4.72398	3.50164	4.97038	71	3.59087	2.11253	4.919	118	6.59099	4.96616	6.75484
pgp1	CGbielefeld-CDS-genome-2	complement(1540427..1541131)		122	6.37068	4.36959	5.53563	131	4.92976	4.84597	4.84869	60	4.64052	3.35408	3.11957	77	6.79123	5.03398	4.78399	78	5.89216	3.46639	5.40397	79	6.59076	4.96598	4.52231
thiD1	CGbielefeld-CDS-genome-2	complement(1541284..1543575)		441	7.08336	4.85841	20.0099	480	5.5561	5.46167	17.7662	381	9.06389	6.55121	19.8092	423	11.4755	8.50619	26.2809	271	6.29686	3.70448	18.7753	620	15.9102	11.9879	35.4915
thiM	CGbielefeld-CDS-genome-2	complement(1543583..1544389)		480	21.8969	15.0189	21.7795	452	14.8597	14.6071	16.7298	517	34.9318	25.2481	26.8803	578	44.5349	33.0114	35.911	685	45.205	26.5943	47.458	1727	125.868	94.8387	98.8611
ndh	CGbielefeld-CDS-genome-2	complement(1544618..1546021)		14022	367.67	252.181	636.235	16156	305.289	300.1	597.98	13766	534.62	386.413	715.732	10831	479.676	355.558	672.928	8423	319.499	187.963	583.56	12559	526.121	396.419	718.932
ufaA	CGbielefeld-CDS-genome-2	1546443..1547759		614	17.1632	11.7721	27.8597	587	11.8249	11.6239	21.7266	568	23.5162	16.997	29.5319	577	27.2419	20.1929	35.8489	543	21.9575	12.9177	37.62	1047	46.7582	35.2312	59.9349
cg1658	CGbielefeld-CDS-genome-2	complement(1547771..1549159)		1167	30.9303	21.2148	52.9515	1216	23.226	22.8313	45.0077	965	37.8817	27.3802	50.173	960	42.975	31.8551	59.6446	841	32.2451	18.9699	58.2659	1358	57.5036	43.3276	77.7379
gpt	CGbielefeld-CDS-genome-2	complement(1549431..1549907)		2488	192.02	131.705	112.891	2752	153.064	150.463	101.859	2094	239.366	173.009	108.873	1665	217.041	160.881	103.446	1743	194.602	114.486	120.758	1761	217.139	163.609	100.807
cg1660	CGbielefeld-CDS-genome-2	1550247..1550819		238	15.2911	10.488	10.799	308	14.2607	14.0183	11.4	162	15.4157	11.1422	8.42283	171	18.5562	13.7547	10.6242	140	13.012	7.655	9.69944	227	23.3007	17.5565	12.9945
cg1661	CGbielefeld-CDS-genome-2	1550870..1551868		205	7.55446	5.18153	9.30168	302	8.0202	7.88388	11.1779	162	8.84207	6.39088	8.42283	89	5.53951	4.10614	5.52955	61	3.25187	1.91309	4.22618	65	3.82688	2.88346	3.72089
cg1662	CGbielefeld-CDS-genome-2	1551936..1552421		1987	150.514	103.236	90.1582	1734	94.6578	93.049	64.1804	1549	173.788	125.611	80.5368	1288	164.788	122.149	80.0232	1192	130.62	76.8444	82.5838	926	112.066	84.4387	53.0083
cg1663	CGbielefeld-CDS-genome-2	1553012..1553707		1625	85.9527	58.9541	73.7328	1559	59.4266	58.4165	57.7031	2358	184.731	133.52	122.599	1910	170.636	126.483	118.668	1148	87.842	51.6779	79.5354	951	80.3653	60.5533	54.4394
cg1664	CGbielefeld-CDS-genome-2	1553925..1555442		1865	45.2295	31.0225	84.6226	1763	30.8123	30.2886	65.2537	2183	78.4127	56.6752	113.5	2218	90.8524	67.3441	137.804	902	31.6449	18.6169	62.4921	781	30.2605	22.8006	44.7079
cg1665	CGbielefeld-CDS-genome-2	complement(1555534..1556151)		667	39.7331	27.2526	30.2645	923	39.6239	38.9504	34.1629	706	62.2903	45.0222	36.7069	476	47.8922	35.5	29.5738	327	28.1792	16.578	22.6551	333	31.6922	23.8794	19.0624
cg1668	CGbielefeld-CDS-genome-2	complement(1556355..1556546)		486	93.1859	63.9153	22.0518	529	73.0968	71.8544	19.5798	341	96.8406	69.9945	17.7295	283	91.6499	67.9352	17.5827	377	104.571	61.5194	26.1192	173	52.9959	39.9311	9.90328
cg1669	CGbielefeld-CDS-genome-2	complement(1556550..1557293)		5073	251.019	172.172	230.182	5675	202.366	198.926	210.048	3902	285.969	206.693	202.876	3306	276.297	204.804	205.401	3350	239.796	141.073	232.094	2577	203.722	153.5	147.519
cg1670	CGbielefeld-CDS-genome-2	complement(1557302..1557649)		2588	273.779	187.782	117.428	3020	230.235	226.322	111.779	2024	317.129	229.215	105.233	1502	268.372	198.93	93.3189	1629	249.294	146.661	112.86	1490	251.828	189.747	85.2941
cg1671	CGbielefeld-CDS-genome-2	1557843..1558241		3358	309.83	212.509	152.366	3523	234.252	230.271	130.396	3135	428.419	309.653	162.997	3019	470.475	348.738	187.57	4593	613.046	360.658	318.211	3256	479.964	361.641	186.388
ppmC	CGbielefeld-CDS-genome-2	complement(1558478..1559290)		4248	192.357	131.936	192.749	4938	161.14	158.402	182.77	4034	270.551	195.549	209.739	3345	255.83	189.634	207.824	3592	235.296	138.426	248.86	3493	252.7	190.403	199.955
ppmN	CGbielefeld-CDS-genome-2	complement(1559323..1560960)		869	19.5308	13.396	39.43	1275	20.6509	20.3	47.1914	689	22.9356	16.5774	35.823	528	20.0432	14.8569	32.8045	512	16.6466	9.79328	35.4722	426	15.2965	11.5256	24.3861
cg1675	CGbielefeld-CDS-genome-2	complement(1560961..1561524)		857	55.9393	38.3682	38.8855	1341	63.0802	62.0081	49.6343	898	86.8163	62.7492	46.6895	775	85.4416	63.3333	48.1506	980	92.5372	54.4401	67.8961	1095	114.191	86.0403	62.6826
lip	CGbielefeld-CDS-genome-2	complement(1561901..1563217)		97	2.71145	1.85976	4.40128	131	2.63894	2.59409	4.84869	89	3.68475	2.66327	4.62736	62	2.9272	2.16978	3.85205	71	2.87106	1.68906	4.919	65	2.90285	2.18723	3.72089
cobG	CGbielefeld-CDS-genome-2	1563247..1564023		113	5.35393	3.67221	5.12726	351	11.9848	11.7811	12.9915	87	6.10524	4.41275	4.52337	85	6.80212	5.04205	5.28103	56	3.83828	2.25808	3.87977	79	5.98003	4.50581	4.52231
cobL	CGbielefeld-CDS-genome-2	complement(1563989..1565317)		435	12.0498	8.26484	19.7377	570	11.3787	11.1853	21.0974	387	15.8778	11.4762	20.1212	402	18.8082	13.9415	24.9762	362	14.5062	8.53406	25.08	460	20.3578	15.3391	26.3324
cg1680	CGbielefeld-CDS-genome-2	complement(1566029..1566769)		922	45.8066	31.4183	41.8349	973	34.8368	34.2447	36.0135	792	58.2789	42.1229	41.1783	660	55.3825	41.0521	41.0057	682	49.0157	28.8362	47.2501	752	59.6894	44.9745	43.0478
pepE	CGbielefeld-CDS-genome-2	complement(1566766..1567905)		1334	43.0791	29.5475	60.529	1591	37.0262	36.3969	58.8875	1149	54.9565	39.7215	59.7397	885	48.2709	35.7806	54.9849	808	37.7464	22.2064	55.9796	1024	52.8314	39.8072	58.6183
cg1682	CGbielefeld-CDS-genome-2	1567935..1568576		252	14.4504	9.91141	11.4343	272	11.2403	11.0492	10.0675	186	15.7973	11.418	9.67065	176	17.0461	12.6353	10.9348	180	14.9316	8.78435	12.4707	225	20.6132	15.5315	12.88
cg1683	CGbielefeld-CDS-genome-2	complement(1568581..1571370)		2402	31.6945	21.739	108.988	3000	28.5273	28.0424	111.039	1948	38.0705	27.5167	101.282	1542	34.3658	25.4736	95.8041	1819	34.7215	20.4268	126.023	1702	35.88	27.0347	97.4299
tatC	CGbielefeld-CDS-genome-2	complement(1571396..1572340)		2991	116.52	79.9198	135.714	2621	73.5832	72.3326	97.0108	2615	150.884	109.056	135.961	2029	133.505	98.96	126.061	1867	105.216	61.8991	129.349	1522	94.7284	71.3756	87.126
tatX	CGbielefeld-CDS-genome-2	complement(1572532..1572849)		2473	286.294	196.366	112.21	3041	253.707	249.395	112.556	1918	328.871	237.702	99.7221	1234	241.287	178.854	76.6681	1315	220.226	129.56	91.1054	1419	262.454	197.753	81.2298
cg1686	CGbielefeld-CDS-genome-2	complement(1572970..1573953)		242	9.05389	6.20998	10.9805	337	9.08612	8.93169	12.4733	212	11.7475	8.49086	11.0225	166	10.4896	7.7754	10.3135	195	10.5538	6.20886	13.5099	212	12.6718	9.54789	12.1358
cg1687	CGbielefeld-CDS-genome-2	complement(1573956..1574933)		447	16.8261	11.5409	20.2822	523	14.1875	13.9464	19.3577	448	24.9772	18.053	23.2928	434	27.5929	20.4532	26.9643	340	18.5144	10.8921	23.5558	525	31.5731	23.7896	30.0533
cg1688	CGbielefeld-CDS-genome-2	complement(1574955..1576403)		1868	47.4596	32.5521	84.7587	1787	32.719	32.1629	66.142	2002	75.3355	54.4511	104.089	1600	68.6591	50.8934	99.4076	1598	58.7324	34.5526	110.712	2072	84.1044	63.3706	118.61
cg1689	CGbielefeld-CDS-genome-2	complement(1576409..1576603)		41	7.74042	5.30908	1.86034	98	13.3332	13.1066	3.62726	48	13.4218	9.70102	2.49565	42	13.3925	9.92714	2.60945	57	15.5672	9.15825	3.94906	55	16.5892	12.4996	3.14844
cg1690	CGbielefeld-CDS-genome-2	complement(1576870..1578414)		960	22.8748	15.6896	43.5591	1084	18.6142	18.2978	40.122	837	29.5394	21.3505	43.5179	699	28.1317	20.8525	43.4287	693	23.8877	14.0533	48.0122	728	27.7141	20.8819	41.6739
cg1691	CGbielefeld-CDS-genome-2	complement(1578415..1579998)		1476	34.3041	23.5289	66.9721	1972	33.029	32.4676	72.9894	1248	42.9599	31.0506	64.887	964	37.8415	28.0499	59.8931	862	28.9815	17.05	59.7208	851	31.5989	23.809	48.715
pimT	CGbielefeld-CDS-genome-2	complement(1580031..1580867)		1376	60.5213	41.511	62.4347	1652	52.3635	51.4735	61.1453	1135	73.9392	53.4418	59.0118	830	61.6594	45.7048	51.5677	707	44.9845	26.4646	48.9822	616	43.2865	32.6153	35.2625
pepC	CGbielefeld-CDS-genome-2	complement(1580913..1582175)		620	18.0719	12.3953	28.1319	844	17.7289	17.4276	31.2389	524	22.6221	16.3508	27.2442	400	19.6926	14.5971	24.8519	373	15.728	9.25289	25.8421	425	19.7917	14.9126	24.3289
recB	CGbielefeld-CDS-genome-2	1582274..1583110		1021	44.9071	30.8014	46.3269	1084	34.3596	33.7756	40.122	697	45.4058	32.8185	36.239	561	41.6758	30.8921	34.8548	352	22.3968	13.1762	24.3872	351	24.6649	18.5844	20.0928
cg1695	CGbielefeld-CDS-genome-2	1583324..1583584		845	119.188	81.7497	38.3411	716	72.7807	71.5437	26.5012	669	139.762	101.017	34.7832	405	96.4853	71.5194	25.1626	397	81.0064	47.6565	27.5048	413	93.0694	70.1256	23.6419
cg1696	CGbielefeld-CDS-genome-2	complement(1583737..1584948)		250	7.59368	5.20844	11.3435	227	4.96898	4.88452	8.40193	169	7.60306	5.49535	8.78678	163	8.36241	6.19861	10.1272	130	5.71229	3.36057	9.00662	259	12.5688	9.4703	14.8263
aspA	CGbielefeld-CDS-genome-2	complement(1585377..1586957)		8054	187.54	128.632	365.442	9390	157.571	154.893	347.551	6327	218.208	157.716	328.958	3600	141.585	104.949	223.667	3713	125.073	73.5809	257.243	2901	107.923	81.3172	166.066
hisG	CGbielefeld-CDS-genome-2	complement(1587067..1587912)		3818	166.142	113.956	173.238	3501	109.791	107.925	129.582	3239	208.759	150.887	168.405	3058	224.757	166.601	189.993	2381	149.885	88.1782	164.96	3857	268.149	202.044	220.792
hisE	CGbielefeld-CDS-genome-2	complement(1587929..1588192)		1036	144.468	99.0891	47.0075	1060	106.524	104.713	39.2337	1013	209.223	151.223	52.6687	858	202.083	149.793	53.3074	853	172.074	101.232	59.0973	1274	283.833	213.861	72.9293
cg1700	CGbielefeld-CDS-genome-2	complement(1588276..1588971)		1314	69.5026	47.6712	59.6215	1534	58.4736	57.4798	56.7778	912	71.448	51.6412	47.4174	767	68.5224	50.792	47.6535	694	53.1031	31.2408	48.0815	740	62.5345	47.1183	42.3608
metH	CGbielefeld-CDS-genome-2	complement(1589037..1592627)		9959	102.098	70.0278	451.88	8830	65.2363	64.1275	326.824	8310	126.18	91.2004	432.06	7447	128.947	95.5819	462.68	5996	88.9233	52.314	415.413	5810	95.1608	71.7014	332.59
cg1702	CGbielefeld-CDS-genome-2	1592810..1593382		205	13.1709	9.03377	9.30168	297	13.7514	13.5176	10.9928	163	15.5109	11.211	8.47482	139	15.0837	11.1807	8.63604	186	17.2873	10.1702	12.8864	105	10.7778	8.12085	6.01066
cg1703	CGbielefeld-CDS-genome-2	complement(1593405..1594433)		414	14.8115	10.1591	18.7848	787	20.291	19.9461	29.1292	423	22.4145	16.2008	21.9929	289	17.4634	12.9447	17.9555	390	20.1845	11.8747	27.0199	377	21.5488	16.2365	21.5811
cg1704	CGbielefeld-CDS-genome-2	complement(1594430..1594789)		151	15.4415	10.5912	6.85148	329	24.2458	23.8337	12.1772	144	21.8104	15.7642	7.48696	108	18.6538	13.8271	6.71002	159	23.5214	13.8378	11.0158	145	23.6899	17.8498	8.30044
arsC2	CGbielefeld-CDS-genome-2	1594870..1595982		511	16.9021	11.593	23.1861	651	15.5178	15.254	24.0954	388	19.0082	13.7388	20.1732	308	17.2069	12.7545	19.136	339	16.2209	9.54282	23.4865	305	16.1177	12.1443	17.4595
cg1706	CGbielefeld-CDS-genome-2	1595999..1596421		351	30.5479	20.9525	15.9263	491	30.7953	30.2719	18.1733	339	43.6982	31.5842	17.6255	222	32.6332	24.1892	13.7928	269	33.8674	19.9243	18.6368	270	37.5423	28.2872	15.456
cg1707	CGbielefeld-CDS-genome-2	1596497..1597138		370	21.2169	14.5525	16.7884	436	18.0175	17.7113	16.1376	278	23.611	17.0656	14.454	225	21.7919	16.1531	13.9792	230	19.0793	11.2244	15.9348	200	18.3228	13.8058	11.4489
cg1708	CGbielefeld-CDS-genome-2	complement(1597308..1597688)		696	67.2511	46.1269	31.5803	858	59.7456	58.7302	31.7571	731	104.616	75.6142	38.0067	497	81.1107	60.123	30.8785	532	74.3629	43.748	36.8579	448	69.1593	52.1098	25.6455
cysS2	CGbielefeld-CDS-genome-2	complement(1597713..1598975)		1131	32.9666	22.6115	51.318	1526	32.0549	31.5101	56.4817	905	39.0705	28.2394	47.0534	577	28.4066	21.0563	35.8489	543	22.8963	13.47	37.62	464	21.6079	16.281	26.5614
bacA	CGbielefeld-CDS-genome-2	complement(1599209..1600012)		2233	102.246	70.1298	101.32	2536	83.6829	82.2606	93.8647	1871	126.888	91.7125	97.2784	1249	96.5946	71.6005	77.6001	929	61.536	36.2019	64.3627	792	57.9384	43.6552	45.3376
[truncated: 1,729 more rows]

## Sheet: (h) T30 +CGP3 TPM
Supplementary Table 7,h. RNA-seq analysis across all targets and time points. Transcript abundance values (TPM) for 30 min Samples without filtering. For each sample, total transcript counts, RPKM, TPM, and CPM values are provided.
[truncated: 3,278 more rows]

[truncated: 1 more sheets: (i) T60 +-CGP3 TPM]
