# Supplementary material
Source: Research Square preprint supplement (doi:10.21203/rs.3.rs-9446490/v1)
Supplement: Supplementary file 6 [file dfb8c7a22fc84f291494fa7b.xlsx]

## Sheet: -CGP3 raw values (a)
Supplementary Table 5.a. Raw values and differential protein abundance during phage infection in -CGP3 cells. Raw protein abundance values for all samples following filtering based on minimum peptide count criteria. Only proteins supported by at least 2 peptides were retained and classified (0_1-3 for t 0 min; 1_1-3 for t = 15 min 2_1-3 for t 30 min; 3_1-3 for t 60 min).
Protein.Group	Protein.Names	Genes	First.Protein.Description	0_1	0_2	0_3	1_1	1_2	1_3	2_1	2_2	2_3	3_1	3_2	3_3
JeanGrey_1	terminase	terminase		0	0	0	0	0	0	0	0	0	238826	466699	145878
JeanGrey_10	hypothetical	hypothetical				750091	10258800	4791370	7533720	7284640	11529000	9468950	6185210	7336160	6768040
JeanGrey_100	hypothetical	hypothetical								2842790	6521850		5180720	6647340	8203270
JeanGrey_101	DNA	DNA					941110	979284	897142	13832300	15580700	20125700	27163000	43798700	66249200
JeanGrey_102	hypothetical	hypothetical					4506280	4839300	3329080	6146630	24214000	9882340	15849900	38466700	15230500
JeanGrey_103	helix-turn-helix	helix-turn-helix		0	0	0	1029620	1668790	3195850	13060800	3781100	13426600	16678500	48731800	16925000
JeanGrey_104	hypothetical	hypothetical									3953880		2801680	3705840	3113540
JeanGrey_105	hypothetical	hypothetical					1617800	1646150	2034450	3406550	14575300	4729150	10340200	18397000	10742300
JeanGrey_106	hypothetical	hypothetical				9770300	2784790	2760040	1926780	8119980	8746470	6836140	14070000	15183800	14933700
JeanGrey_107	hypothetical	hypothetical					1460560			5006440	26655400	5606260	7761680	16039700	5747600
JeanGrey_108	PreQ0	PreQ0		0	0	0	3062770	3317590	2142620	3362610	21269700	18038100	21978200	26273600	13087100
JeanGrey_109	membrane	membrane					647409		1414060	1329690	3855720	2861980	5777250	9119790	6400190
JeanGrey_11	hypothetical	hypothetical					1405920	551444	408239	1062930	1019050	549718	255681	625009	923277
JeanGrey_111	hypothetical	hypothetical		355017		798436	4268270	3512030	3573700	6460110	11685900	6140860	9767730	15300200	8168450
JeanGrey_112	MazG-like	MazG-like		0	0	0	4707820	4810180	7087340	18846000	17306100	10652300	21175800	15614600	28966600
JeanGrey_113	hypothetical	hypothetical					14880800	8943510	13483500	45498700	122275000	36454700	6189250	18410600	12992300
JeanGrey_114	hypothetical	hypothetical					2193230	1813490	2471410	8147790	22050500	7280920	5807310	7026720	10040000
JeanGrey_116	nucleotide	nucleotide		0	0	0	1770240	1770740	1329960	3343470	3714040	3259080	2500690	3200540	3196240
JeanGrey_117	hypothetical	hypothetical				1641020	57333300	43120300	34282500	70107700	119275000	64500000	46111400	60431300	76498100
JeanGrey_118	hypothetical	hypothetical					19296600	8180510	16440500	13905800	34916600	20515500	14521600	28537600	23694400
JeanGrey_119	membrane	membrane					2428740	832386	489181	877223	2087280	1176060	337927	260904	693672
JeanGrey_12	hypothetical	hypothetical					3108230	1992850	5165930	10632200	22822000	11663600	6185980	5392400	11593800
JeanGrey_121	hypothetical	hypothetical					11014700	4035040	4133380	5430380	16566500	7196050	5619470	7666180	7568670
JeanGrey_122	hypothetical	hypothetical		1765560		824455	35978900	16601200	39734300	17312900	78154500	34881800	14020700	19063500	19691000
JeanGrey_125	ribonucleotide	ribonucleotide		0	0	0	245221	204510	365455	0	0	0	2781440	3876670	1301090
JeanGrey_127	hypothetical	hypothetical					36661100	33140800	34328800	210942000	77670500	101119000	269220000	224619000	309177000
JeanGrey_128	minor	minor		0	0	0	7887970	6812530	9893340	2670940	14947800	7072300	2487810	3696100	4064200
JeanGrey_129	hypothetical	hypothetical											2511000	8496550	1928920
JeanGrey_130	minor	minor		0	0	0	4765150	3171850	3589020	1399520	7884630	2482030	2420730	3594980	2188380
JeanGrey_131	minor	minor		0	0	0			137884		192938
JeanGrey_132	minor	minor		0	0	0	1072470	964934	572278	316258	2169880	733541	973618	950348	283739
JeanGrey_133	lysin	lysin		0	0	0	0	0	0	0	0	0	55196.6	199707	244799
JeanGrey_134	minor	minor		0	0	0	26961700	12011000	18988800	5585080	39346800	11678800	7690650	6987100	4643600
JeanGrey_135	hypothetical	hypothetical					118889	111164	111188		22034.9		6032.88	96841.7	60052.9
JeanGrey_137	hypothetical	hypothetical					1265110	1333940	1388450	771999	1903210	1456300	1074150	1683650	931376
JeanGrey_138	lysin	lysin		0	0	0	0	0	0	0	0	0	25358800	45592300	36951300
JeanGrey_139	anti-CBASS	anti-CBASS		0	0	0	0	0	0	0	0	0	22208200	51295100	33261600
JeanGrey_15	hypothetical	hypothetical				651562	11658800	7341870	10142100	9423840	50401500	22201000	12853900	20555400	14256500
JeanGrey_16	hypothetical	hypothetical					23098800	14828900	20610300	14836400	59692800	47431200	7462050	21823900	12819800
JeanGrey_18	metallophosphate	metallophosphate		0	0	0	1614580	1554190	1273860	2721210	3260590	2821860	5908850	8493330	4083150
JeanGrey_19	ThyX-like	ThyX-like		0	0	0	0	0	0	5437800	6635700	5050640	6370410	9295930	12037100
JeanGrey_2	hypothetical	hypothetical					2358470	2582660	1338520	3156810	5901190	3736410	3940110	4995900	4477390
JeanGrey_20	hypothetical	hypothetical								253723	707834	417109	531522	691205	822768
JeanGrey_21	hypothetical	hypothetical					8359200	6446570	8581190	17468800	69822500	32252700	21364700	61012100	31474100
JeanGrey_22	hypothetical	hypothetical									62441		1163030	1356040	942293
JeanGrey_24	membrane	membrane											72501.6	69729.3	110350
JeanGrey_25	hypothetical	hypothetical					27949400	20663200	21951800	36913100	77356700	42489200	49455900	55736800	60336100
JeanGrey_26	hypothetical	hypothetical											583951	698925	653326
JeanGrey_27	portal	portal		0	0	0	4310760	3139720	3332370	3821570	11587100	4625800	8670810	11034700	7932410
JeanGrey_29	hypothetical	hypothetical					4025990	1025950	2829960	770772	6403020	994870	970410	1743240	1362610
JeanGrey_3	hypothetical	hypothetical				625943	45475000	22973300	20125100	12226700	37084300	18394200	10385900	17189800	8766730
JeanGrey_30	capsid	capsid		0	0	0	19455900	22579300	30957700	9783100	34796000	16844600	56783400	73673500	51940300
JeanGrey_31	hypothetical	hypothetical					8579750	4308430	2752150	3394050	10689000	6210680	11693400	24657900	9803970
JeanGrey_32	major	major		0	0	0	309322000	308705000	468688000	126642000	551048000	348239000	553742000	748231000	594478000
JeanGrey_33	Methylcarbamoylase	Methylcarbamoylase		0	0	0	0	0	0	0	0	0	186125	121334	84023.9
JeanGrey_34	hypothetical	hypothetical					230352						1241610	546505	485752
JeanGrey_35	hypothetical	hypothetical					71020.4	24551.5	14161.7	43973.6	59612.6	51403.1	229537	227653	498894
JeanGrey_36	hypothetical	hypothetical					96903900	20994500	34183100	114686000	147799000	143415000	113803000	248783000	209870000
JeanGrey_37	hypothetical	hypothetical					35532200	44417300	40473700	54628600	139797000	73976200	70203100	112908000	71979600
JeanGrey_38	hypothetical	hypothetical					101405	99626	87147.2	56131.7	59221	91195	75824.1	110333	111941
JeanGrey_39	hypothetical	hypothetical					9605810	3887270	4526520	3288950	11877200	3927140	2636280	3247780	2524540
JeanGrey_4	hypothetical	hypothetical				514461	1666290	1582000	3380710	3377830	9694410	5510080	2759990	4179830	2586380
JeanGrey_40	head-to-tail	head-to-tail		0	0	0	2589410	1772840	2287900	0	0	0	766564	2405920	1094200
JeanGrey_41	hypothetical	hypothetical							339315		641560	420620	544889	750024	245721
JeanGrey_42	hypothetical	hypothetical					1745200	447637	1064910	497988	3319380	883483	191616	281056	896323
JeanGrey_43	tail	tail		0	0	0	44947400	64354900	49054300	19009400	106087000	46522100	40126800	53470400	31219400
JeanGrey_44	hypothetical	hypothetical		3798630		3155610	42208300	27333600	23198700	6187730	39025300	13728900	11238100	30754400	15787500
JeanGrey_45	hypothetical	hypothetical								1043080			4695030	14885400	32187300
JeanGrey_46;JeanGrey_47	Nter;tail	Nter;tail		0	0	0	0	0	0	0	0	0	28981800	52833600	38317200
JeanGrey_48	tape	tape		0	0	0	5074790	4608490	7238470	2675080	8447920	4990910	7740140	16930700	8299180
JeanGrey_49	minor	minor		0	0	0	5109580	1839820	2200360	663254	4245930	1605410	1672340	2314350	1532260
JeanGrey_5	hypothetical	hypothetical					2964100	1372190	2263260	3868500	4143060	4377680	6342110	8273120	5856420
JeanGrey_50	hypothetical	hypothetical											137140
JeanGrey_51	hypothetical	hypothetical					1368110	1132500	1882490	781552	2712020	2033490	1688920	1616230	1547680
JeanGrey_52	minor	minor		0	0	0	361208	465923	442562	141321	1001300	450409	420454	671722	387263
JeanGrey_53	hypothetical	hypothetical											853283	1447750
JeanGrey_54	baseplate	baseplate		0	0	0	1367620	1267190	752903	372377	6708580	1111510	3667870	2181540	947671
JeanGrey_55	baseplate	baseplate		0	0	0	36411000	31646500	55464500	13526600	82859200	32340600	11368800	23043400	11697900
JeanGrey_56	minor	minor		0	0	0	4172570	6091080	6284960	2763290	8667650	4090190	2945050	3998330	4843520
JeanGrey_57	minor	minor		0	0	0	5745830	6095700	5843720	2376320	11275400	5132340	1689220	3583260	3104100
JeanGrey_58	DNA	DNA								130644			1236240	932010	592353
JeanGrey_59	hypothetical	hypothetical					1166850	1036100	1507670	983392	3906400	1591540	672983	882111	636449
JeanGrey_6	hypothetical	hypothetical					1052660	1391550	2008300	1123330	6564960	4044990	3061190	9547370	2813420
JeanGrey_61	hypothetical	hypothetical					32597.2					26608.2
JeanGrey_63	WhiB	WhiB		0	0	0	6728340	3735190	6489270	15353300	17997400	10612400	21645800	21770900	14269000
JeanGrey_64	DNA	DNA					4497970	4471560	3261590	7249420	18318000	10441600	28253800	34808400	16600600
JeanGrey_65	hypothetical	hypothetical					43941.6				33953.9		33044.4	50841	64462.8
JeanGrey_66	hypothetical	hypothetical					7141470	2761150	10548000	15943800	16761900	22031800	21067400	34217800	34262600
JeanGrey_67	helix-turn-helix	helix-turn-helix		0	0	0	764570	485300	1251550	4440550	2879990	7333300	4196700	5662580	4425420
JeanGrey_68	thymidylate	thymidylate		0	0	0	1822160	1309420	1351700	2961110	4845740	2748380	5866640	5651350	3213430
JeanGrey_69	hypothetical	hypothetical					194657	471082	591158	1345000	1104020	1789170	3969690	6024630	2324730
JeanGrey_7	membrane	membrane							594164			1339940	1388330	1148110	687129
JeanGrey_70	folE-like	folE-like		0	0	0	10848000	6551320	6661270	21544300	44657100	19323200	33617200	51288600	40913000
JeanGrey_71	hypothetical	hypothetical				1195830	10172600	12301400	8245620	33862000	25203800	17176100	37118000	55942000	51538700
JeanGrey_72	hypothetical	hypothetical					7909530	6520420	9326220	11002300	22797700	8949010	15223600	17147800	25350900
JeanGrey_75	hypothetical	hypothetical					102750			136045	200015		270034	347405	277946
JeanGrey_76	GNAT	GNAT		0	0	0	0	0	0	1441480	2114450	1410280	2800960	3749110	2109570
JeanGrey_77	hypothetical	hypothetical					1519770	1686250	3728170	2920560	11147500	6976380	11933600	22582200	8316910
JeanGrey_78	methyltransferase	methyltransferase		0	0	0	0	0	0	6962270	10966800	8408940	20328800	30164600	21053200
JeanGrey_79	hypothetical	hypothetical					761312			3946770	2624160	1975760	3786030	8227910	6959890
JeanGrey_80	dpdA-like	dpdA-like		0	0	0	0	0	0	2151260	2407290	1348180	6619890	6394200	6043700
JeanGrey_81	exonuclease	exonuclease		0	0	0	3810270	2489060	3183870	15605200	19969200	12367300	18428600	31178000	22476900
JeanGrey_82	PreQ0	PreQ0		0	0	0	1863830		1003930	3273950	5331130	3692090	6494450	9437040	9077400
JeanGrey_83	hypothetical	hypothetical			6828100		12047100	4465690	7673530	16549400	11894100	8624980	12106900	17579600	32127400
JeanGrey_84	hypothetical	hypothetical					1744520						7664190	9140590	7400180
JeanGrey_85	aminotransferase	aminotransferase		0	0	0	0	0	0	0	0	0	2047820	2191060	4505540
JeanGrey_88	hypothetical	hypothetical					1806870	879899	1462260	3045240	7463790	4263790	2300710	6164320	3726970
JeanGrey_89	DnaC-like	DnaC-like		0	0	0	0	0	0	0	0	0	3345600	7402860	4807540
JeanGrey_90	DnaB-like	DnaB-like		0	0	0	2417820	3100410	4763460	4665020	5405610	3229900	9045170	11471200	8177990
JeanGrey_91	DNA	DNA					1175270			4451330			4063740	7441140	10124900
JeanGrey_92	hypothetical	hypothetical					1667140	1380780	1072450	5850630	31393000	11892900	7432440	14244400	8496630
JeanGrey_94	SSB	SSB		0	0	0	6345540	6977430	9495850	22459000	24870900	29688300	43784900	63900600	45259200
JeanGrey_95	DnaE-like	DnaE-like		0	0	0	601851	608726	822134	1434690	4290640	1595300	1999590	4940060	3557050
JeanGrey_96	RecA-like	RecA-like		0	0	0	0	0	0	4162820	11771500	9191000	3579910	4126010	20076600
JeanGrey_97	Holliday	Holliday					0	0	0	860298	730337	839353	1104740	709681	980744
JeanGrey_99	RuvC-like	RuvC-like		0	0	0	0	0	0	1924420	3855780	5827700	5381160	7878510	8760080
accBC	BIOTIN	BIOTIN		216677000	195560000	181928000	206672000	198553000	114677000	178836000	192892000	124342000	165149000	169771000	170874000
accDA	ACETYL-COENZYME	ACETYL-COENZYME		6553360	12230900	3076840	2600440	5379960	4454230	10495800	1873090	6428890	2341080	5719920	11422800
aceA	ISOCITRATE	ISOCITRATE		2176800	2650060	2702680	2138150	1046740	4604590	6182000	4658810	3032700	1104000	1109700	1730270
aceB	MALATE	MALATE		396891	969932	508330	199933	816644	778601	1136390	691469	794385	628215	776352	724823
aceE	PYRUVATE	PYRUVATE		37525900	66298900	49407600	35137300	33576200	33897100	50046500	39769400	33725600	28636900	42145200	42792500
ackA	ACETATE	ACETATE		3976510	1026250	2113160	2307680	1821680	855147	1323990	930812	732240	1421500	1839880	1165170
acn	ACONITASE	ACONITASE		54163200	57447400	50947400	56272100	44548900	63168600	63808800	93737400	45812200	64065300	94106400	69319300
acpM	ACYL	ACYL		13386200	5837960	6927490	18542000	23976800	15391200	11693600	17782200	14934300	6446280	8916560	5483290
actA	BUTYRYL-COA:ACETATE	BUTYRYL-COA:ACETATE		217659000	227588000	202304000	195546000	210593000	193557000	246852000	282709000	177942000	163440000	159485000	187107000
adhA	Zn-dependent	Zn-dependent		4495140	6697500	1554630	2604080	1767940	11939500	14274800	8194280	3237640	5047720	3601970	6083330
adhC	ALCOHOL	ALCOHOL		2174770	2362190	3284920	3284000	1649600	5064630	1813390	5531360	2840990	2730260	3885170	1691230
adhE	PUTATIVE	PUTATIVE		13024200	14531400	14884300	16006300	8103020	20715200	10080300	32066700	10986100	12536200	17798900	10024900
adk	ADENYLATE	ADENYLATE		223599000	105313000	121055000	230245000	234127000	183272000	163807000	220944000	172816000	95303000	155962000	153997000
aecD	Cystathionine	Cystathionine		36617	50268.8	32729.1	23113.5		76376.2	61906.2	132082	53411.4	41224.9	59634.5	51022.7
alaS	ALANYL-TRNA	ALANYL-TRNA		4657470	3776310	3919480	5761590	3426200	3433750	4085610	4667240	3768040	3953670	6605980	5600500
alr	ALANINE	ALANINE			239152	232165	0	0	0	308202	625658	344736	475910	565149	238783
amiA	PUTATIVE	PUTATIVE		11989700	3505790	5971910	4952120	4427250	14015700	9617850	5168240	6996750	1774970	3873940	8807980
amn	AMP	AMP		555153	698087	905060	557749	456548	867454	751435	1239930	577969	818009	1040420	691457
amtR	AMTR	AMTR		2278010	2407640	4886160	2909850	3589170	2570790	0	0	0	2564300	4215450	1327820
amyE	MALTOSE-BINDING	MALTOSE-BINDING		415547000	451100000	437497000	332822000	392790000	413896000	373195000	258387000	305876000	272174000	261724000	296830000
apt	ADENINE	ADENINE		8848060	5252840	4914300	3656340	4048250	3883070	2896360	5369330	4469370	6403790	7868490	3756030
arcB	PROBABLE	PROBABLE		477163	413597	395468	153209	398867	220053		664723	484484	646460	767042	2107920
argB	ACETYLGLUTAMATE	ACETYLGLUTAMATE		4865440	5280400	1312440	1111400	1439030	3179610	1600970	2465300	2610860	3356350	2293960	1704650
argC	N-ACETYL-GAMMA-GLUTAMYL-PHOSPHATE	N-ACETYL-GAMMA-GLUTAMYL-PHOSPHATE		1576760	1149000	1717520	1203580	1296440	2040390	1370900	3644690	1615120	951707	1344340	1298070
argD	ACETYLORNITHINE	ACETYLORNITHINE		532708	559630	778944	1549830	1340270	906839	882126	2776030	968477	689777	2096130	658417
argF	ORNITHINE	ORNITHINE		708537	680676	1039640	0	0	0	0	0	0	1125580	1458630	798029
argG	ARGININOSUCCINATE	ARGININOSUCCINATE		22634600	29642800	26750600	25423700	22899100	24043700	33222000	33518000	27623000	28266500	35288000	37970700
argH	ARGININOSUCCINATE	ARGININOSUCCINATE		7035010	4872250	2540700	4283150	2427990	6923110	8300980	3427440	5779800	3176450	4512080	6142290
argJ	GLUTAMATE	GLUTAMATE		17544100	9348020	9824540	16505000	18252600	15975100	10041200	18084000	9468680	9178410	12172000	7180290
argR	ARGININE	ARGININE		2097550	2250410	1773570	1128980	2470330	1622940	3474220	1033050	1622430	1962000	2566200	3314150
argS	ARGINYL-TRNA	ARGINYL-TRNA		3277480	4533880	2841090	1801060	3038870	2664340	3702790	3469850	1887500	2311590	2999080	5885490
aroA	3-PHOSPHOSHIKIMATE	3-PHOSPHOSHIKIMATE		12289100	9904390	12100600	20067000	18243500	12896400	8183280	18414800	11777000	13767500	23009000	10218100
aroB	PROBABLE	PROBABLE		105631	89826.1		389813		107895	161750	204881		52070.4	246193	211669
aroC	PUTATIVE	PUTATIVE		2026790	3297770	1822950	975688	931812	1522320	576530	993413	928445	2614460	3266840	1809480
aroD	PROBABLE	PROBABLE		147970	136054			187502		132166					138028
aroE	PUTATIVE	PUTATIVE		1329650	1096410	865103	953020	959642	981794	1131570	1522150	756977	759235	1035230	726135
aroE2	PUTATIVE	PUTATIVE		3267100	2883350	1794980	3610110	2567570	2499760	1864030	5369230	1561210	1486660	3352850	1940240
aroE3	PROBABLE	PROBABLE		282231	234990	685401	632067		775532	359152	1035220	955174	312962	1434470	84087.8
aroF	PROBABLE	PROBABLE			57576.1	23989.5	60447.8	56065.8		109175	158209		99697.3	96658	97448.8
aroG	PHOSPHO-2-DEHYDRO-3-DEOXYHEPTONATE	PHOSPHO-2-DEHYDRO-3-DEOXYHEPTONATE		10784100	13839500	11770200	11044600	12932000	14012200	10600800	15735800	14756300	13467100	16646000	8719220
aroK	SHIKIMATE	SHIKIMATE		1132540	1138600	872981	2905180	1540100	1599700	1611300	3551710	1342460	2655290	3213880	2477170
arsX	ARSENATE	ARSENATE		6168560	3811830	2363040	2891500	10121900	2919960	3912970	1792050	2662640	863052	1918940	2715450
asd	ASPARTATE-SEMIALDEHYDE	ASPARTATE-SEMIALDEHYDE		18115900	19365100	14486100	24577900	18404000	26197100	13930100	23067600	31295500	10340800	19672700	22201800
aspA	ASPARTATE	ASPARTATE		2472980	4524780	4740960	3920560	2946610	4777350	4258650	3449900	2978830	2994070	3524770	3902280
aspB	ASPARTATE	ASPARTATE		2536120	3289410	3876480	2685910	2467480	3393340	3419680	5399250	2839820	3674550	4296720	3162700
aspS	PROBABLE	PROBABLE		4684170	4172650	4497010	4905120	4950580	6194960	6470310	13315500	6895850	7759910	9377340	6709630
atpA	PROBABLE	PROBABLE		139156000	155862000	144407000	169763000	125956000	174973000	215175000	170988000	157270000	144547000	202899000	166234000
atpC	PROBABLE	PROBABLE		29202700	22122100	16763800	5292920	32500200	10219600	31027700	11618100	8574760	15431300	34636600	24732700
atpD	ATP	ATP		152621000	175206000	172608000	138749000	171693000	145071000	237165000	233698000	123966000	211123000	265333000	207492000
atpF	ATP	ATP		60703200	79964000	73881100	78811900	84213600	75322800	98556800	102687000	94260500	105588000	80036900	76208200
atpG	ATP	ATP		158357000	137303000	158157000	149867000	166569000	130999000	193128000	130269000	168292000	163299000	140937000	183658000
atpH	H+-ATPASE	H+-ATPASE		23432400	33433600	24983000	14306000	27372300	24148000	47559900	37018300	28467100	23026400	24692500	45584100
bcp	PROBABLE	PROBABLE		17655100	17166000	16856900	18687800	14750000	19151500	25043800	17190000	22439600	15211100	12119900	27719900
bex	BEX	BEX		18135300	21717200	15614200	42377600	27126500	33964100	20692100	18727000	21272200	16474200	14340700	33989400
bioB	BIOTIN	BIOTIN		1620680	988375	1811350	1884170	2099800	1780820	1369490	4929170	1356540	799220	1241800	1025410
bioD	DETHIOBIOTIN	DETHIOBIOTIN		4209340	4933380	3769170	3584710	4331530	4902910	3512170	5603790	5335600	1840850	2023690	2567190
birA	BIFUNCTIONAL	BIFUNCTIONAL		702230	1104590	507837	1405860	1498200	1051750	942930	1177120	758439	493925	892434	609004
butA	L-2,3-butanediol	L-2,3-butanediol		148687000	169375000	194772000	153970000	133303000	131370000	205624000	142884000	175344000	119915000	127278000	103108000
capD	PROBABLE	PROBABLE		2097650	4466590	1627730	4523280	2473550	2960440	5505970	4890480	2644280	2871580	4486710	5754050
carA	CARBAMOYL	CARBAMOYL		694084	962808	1094120	680311	472355	677157	710232	343306	505139	501814	521773	732875
carB	PUTATIVE	PUTATIVE		8930100	9542580	8541880	9557520	9262800	10517800	12280100	21485400	7405920	9401940	15141500	12893300
catA1	CATECHOL	CATECHOL		15815200	15780800	11551500	18551300	17013500	10776500	20834400	13409000	12659000	17948800	12547100	7548970
catA3	CATECHOL	CATECHOL		1150960		949334	729381		2011510			1415080	948977	1054340
catB	CHLOROMUCONATE	CHLOROMUCONATE		312795	404347	620798	0	0	0	0	0	0	0	0	0
ccpA1	PROBABLE	PROBABLE		3924190	2769770	3709720	2165630	2603980	4048370	3529190	2089750	1912630		3696750	897256
cg0008	HYPOTHETICAL	HYPOTHETICAL		481282	403280	314291	658370	450710	372605	160999	170752			327080	242919
cg0010	conserved	conserved		31456300	15958700	30540300	32212700	41861000	37227000	27831200	48480500	32460000	18144300	24404500	20255700
cg0012	PUTATIVE	PUTATIVE								155461			238558	178939	893345
cg0021	hypothetical	hypothetical					88232.5
cg0026	HCCA	HCCA		4639460	2131890	4783080	4749790	4712620	5191820	4749250	2751910	3894460	0	0	0
cg0044	PROBABLE	PROBABLE		859770	765570	916704	672566	910374	854420	694408	845128	840250	746512	697773	624351
cg0046	PROBABLE	PROBABLE		78289.8	155596	40607	99731.6	97741.7	52098.1	67897.1	89407.5	64208.6	52647.4	28740.6	133459
cg0047	conserved	conserved		51943300	72392400	52401500	31144800	39291400	16170700	81411600	22326900	32711000	44315500	31719500	46572700
cg0055	putative	putative		536367	735313	193391		966064	907798	560668		732200	1161550	805454	298764
cg0063	Secreted	Secreted		4678290	4992610	1278630	6492370	2577280	3914330	374462	2302620	1679540	3889840	2526040	435271
cg0064	conserved	conserved		14621600	2613020	7546790	17043600	20775100	33672000	13492500	28223000	21636200	8425210	6223140	2892240
cg0066	hypothetical	hypothetical		18483.8		14401.6	55289.1		9017.06	21605.4	26250.7	17934	8433.39	14152.6	11197.1
cg0075	conserved	conserved		5915940	3096860	2577330	3838340	10705800	6336840	2823300	8233600	4259820	2858390	2944480	1726850
cg0076	hypothetical	hypothetical			90556.1	185282	54634.1	156239	243562	292076	187200	267579	307983	497472	349724
cg0080	CorA-like	CorA-like		0	0	0	0	0	0	0	0	0	418122	566922	416734
cg0081	putative	putative		932518	370135	282665	264333	707146	275661	515585	937663	1413360	616728	620283	172671
cg0091	D-isomer	D-isomer		949780	659704	1107260	281798	993044	395203	470065	609748	208314	121942	321601	644153
cg0092	PUTATIVE	PUTATIVE		5241040	2849380	11392100	5082430	4312910	4358110	13000300	3884530	4076820	7735960	4592030	10405100
cg0096	conserved	conserved		1044250	410254	1169430	2425820	1131560	831380		2149790	533978	176482		280894
cg0107	secreted	secreted		17133900	4652520	7130040	13652100	13238400	27178200	5381810	40514700	18116200	7511860	14154100	10908000
cg0109	TRIACYLGLYCEROL	TRIACYLGLYCEROL		2504200	1052620	1627560	4208300	2553460	1731050	1492980	4324630	2576560	990691	1415970	1422240
cg0111	hypothetical	hypothetical							749537
cg0120	Esterase/lipase/thioesterase	Esterase/lipase/thioesterase		352988	1064170	507379	0	0	0	0	0	0	0	0	0
cg0122	putative	putative		398752	322971	305723	420899	289703	1097320	270317	615264	425881	925812	513773	407990
cg0123	PUTATIVE	PUTATIVE			25859.6		71925						44885.7	128010	38562.7
cg0131	PUTATIVE	PUTATIVE		7048440	5348190	8935930	7573560	3531700	4270510	5126650	4209360	2843830	3801310	4374470	5497860
cg0134	HYDROLASE,	HYDROLASE,			655147	463443	0	0	0	0	0	0	0	0	0
cg0139	Bacterial	Bacterial		2187710	1586500	5200520		1140160	2726770		3441390	1544430	1575560	1935130	2432970
cg0141	Glyoxalase/Bleomycin	Glyoxalase/Bleomycin		47354700	29159200	50248600	28734600	69384600	133374000	34300600	177094000	132929000	23399000	26333100	22190200
cg0146	Bacterial	Bacterial		121246	107599	224647	90836.2	86004.1	264849		175522		196790	137758	82616.2
cg0152	hypothetical	hypothetical		2599860	755465	2096180	1449850	944592	3920900	1795430	1679440	1828000	1024510	1313810	1551000
cg0154	haloacid	haloacid		1486330	1792650	683384	491763	1484010	322768	0	0	0	524511	858614	1707290
cg0155	PUTATIVE	PUTATIVE		582269	547748	852876	1708890	502930	661120	712438	2072770	717142	521023	845483	312717
cg0156	Bacterial	Bacterial		2767510	3565750	7764110	4569730	4787050	2961670	5646070	7723960	5146430	11340600	16092200	12075700
cg0161	putative	putative		6214710	3577220	5052450	7227270	5679210	7541040	7381580	14318600	6758820	5674000	6570350	5463850
cg0162	MEMBRANE	MEMBRANE		409600	183723	114156	391661	348026	677522	459338	522863	527441	156638	322204	436477
cg0166	REPEAT	REPEAT		2306620	2239900	1600470	2739450	1269870	1404860	1574930	1994570	2213070	828596	1763800	1014700
cg0173	CONSERVED	CONSERVED		1450290	1088780	631148	668564	1549260	505412	1791360	2188220	942196	1013550	1521120	2053250
cg0177	hypothetical	hypothetical				20515.7	87313.5						17740.2	64489	35595.5
cg0184	CONSERVED	CONSERVED		7120390	2472150	987383	1804600	5933080	2962420	1409390	5630650	2897240	1250010	2421590	4447790
cg0185	Glyoxalase/Bleomycin	Glyoxalase/Bleomycin		139210	78700.1	365992	203952	285605	273760	237553	183318	193416	138963	261886	72924.3
cg0188	conserved	conserved		238412		112456	271295						165936	224920
cg0191	translation	translation		3033650	1430010	1447960	3131200	3106770	4360750	1422520	2937830	2673430	706690	1043110	1131630
cg0192	conserved	conserved		51828700	33761700	72154900	59589800	68824400	54959200	64661600	29385900	47711300	37759000	80051200	27703400
cg0195	membrane	membrane				533970	684037	559372	1004560	1136920	1498240		825706	577329	546527
cg0196	Bacterial	Bacterial		1837520	2088320	2221400	2043360	2124750	3321320	1485440	3321740	2053660	1700290	2027110	1633830
cg0198	conserved	conserved		7000380	8004140	15702400	13667600	9819330	11206400	7755010	11963200	8743890	5483250	8450390	4411790
cg0207	HYPOTHETICAL	HYPOTHETICAL		336207	361270	432522	278542	371918	948362	201342	665426	352536	410482	717741	183027
cg0208	hypothetical	hypothetical		86550.5	67296.9	87136.5	64005.2	225580	318408	184846	499079		51422.1	55513.5	157206
cg0211	PUTATIVE	PUTATIVE		177024	281363	257404	227272		325571	147292	566991	206682	338183	270537	72327.6
cg0212	phosphate	phosphate		426934	316576	570648	853203		1069810	690073			238742	279096	356958
cg0218	O-METHYL	O-METHYL		1013520	801386	560277	0	0	0	1200420	2405860	1315570	1033340	1607410	917712
cg0220	Acetyltransferase,	Acetyltransferase,			160388				171221				0	0	0
cg0223	METABOLITE	METABOLITE		3200860	1470220	884500	0	0	0	0	0	0	0	0	0
cg0228	SENSOR	SENSOR		18370500	15274800	20129900	11685000	15885800	15707300	16737900	13495600	11637500	10973400	10167200	12694700
cg0233	conserved	conserved		5403690	8595810	9777750	7955560	4153770	4728820	6790690	4663320	4541780	5594850	4546230	5116920
cg0236	membrane	membrane		212651	135556	35091.3	84572.1	274596	320076	97074.6	200423	364514	42849.1	72420.2	69945.2
cg0237	PUTATIVE	PUTATIVE		14764500	21526100	25930100	15093500	17328800	25304800	14649100	15324100	13867800	21248100	19379300	36103500
cg0238	L-GULONOLACTONE	L-GULONOLACTONE		1714600	2004570	1172490	2232220	1138060	2793060	994565	2318720	1804320	2321120	1966320	3072130
cg0239	hypothetical	hypothetical		43585300	27754600	20079100	37274500	132928000	33424700	78273800	85982900	40195100	14451900	33191900	79534100
cg0240	membrane	membrane			79613.4	92955.5	92525.8		61502.9	85909.8				137874
cg0245	conserved	conserved			85159.4	73220	16908		95290.9	147749	275871	88206.5	68977.3		344794
cg0246	GLYCOSYL	GLYCOSYL			105786	191068	160541		51241.3		63476.6	52762.6	161470	108865	130749
cg0247	conserved	conserved			1290850	1087830	2137000	1276870	917077	1372510	2152920		891148	984375	800004
cg0248	PUTATIVE	PUTATIVE		1927050	3380080	4510880	4708680	4625370	4116170	2284750	9001580	4470920	1862500	4460750	3048780
cg0250	AMINOTRANSFERASE	AMINOTRANSFERASE		350729	616112	321549	323909	308774	284549	416453	504085	356779	458168	390412	485436
cg0264	PUTATIVE	PUTATIVE		8329790	5180080	2571880	6941270	10092500	14806400	1479920	21679900	8648320	3221040	5473520	2063290
cg0265	ABC	ABC				39550.6	59216.8		56583.1		45744.1			52949.5	47940.3
cg0280	conserved	conserved		2959890	6155110	7421460	5427790	14112300	6006950	5199140	11231400	5018410	6889520	12970800	2214700
cg0281	PUTATIVE	PUTATIVE		129964	212764	223081	1019630	659848		137322	149566		554316	855756	1103880
cg0282	conserved	conserved		789323000	336899000	464801000	841067000	871591000	1240570000	379438000	1434120000	527017000	215597000	507563000	236149000
cg0295	conserved	conserved		9907470	9465780	9256550	10231600	11375300	14084800	9651370	25786300	13212200	8690140	13601800	7546760
cg0297	Uncharacterized	Uncharacterized		22898700	11778700	14915300	13299300	23857200	39379200	11388100	211285000	27763800	12243600	27078900	35403400
cg0300	hypothetical	hypothetical		446993	238670	206102	244857	338425	186331	300411		159483	244739	353023	444546
cg0302	DNA	DNA		154945	250934	812189	144762	111931	185047	231623	183111	126053	293190	223266	303384
cg0321	Na+/H+	Na+/H+			26473.3	41429.6	0	0	0	0	0	0	0	0	0
cg0325	Na+/H+	Na+/H+		236553	352718	282610	0	0	0	0	0	0	0	0	0
cg0334	secreted	secreted			3886.69									121092
cg0335	conserved	conserved		62796600	32857600	44232700	72549000	81069700	42025200	82558700	105714000	75316000	29096900	44211300	48389600
cg0338	CONSERVED	CONSERVED		93001200	63922100	39309600	102052000	115381000	77104700	47822100	164312000	142575000	38304300	70567600	75079600
cg0339	translation	translation		814886	894472	835177	521581	570923	747943	317691		792453	569056	833379	823149
cg0343	PUTATIVE	PUTATIVE		2657720	4070150	4281670	2273800	3425870	2410870	2363960	1566090	2073780	1972290	2064600	1019120
cg0349	METALLO-BETA-LACTAMASE	METALLO-BETA-LACTAMASE		5698320	7317240	6982800	8848260	8512410	7809400	10899700	9956510	7122710	6282140	8782220	10129800
cg0350	TRANSCRIPTIONAL	TRANSCRIPTIONAL		2977440	2121520	2909140	2550720	2428590	4134870	3055250	4067740	3802230	2404040	2703940	2365400
cg0355	pyrophosphohydrolase	pyrophosphohydrolase		2846230	1074280	2009560	1476960	902819	2859070	1570900	924756	2788930	1246030	611484	1159770
cg0358	hydrolase	hydrolase		592157	484879	293639	979254	448430	609464	953004	890870	696267	406340	443233	569028
cg0359	PUTATIVE	PUTATIVE		31664200	56466000	46205500	37314500	51575800	81075400	56602900	102683000	101957000	64205800	88038000	58048100
cg0378	putative	putative		176759	179264	151410	123755
cg0388	Zn-dependent	Zn-dependent		76664500	74041900	27175000	9139760	115738000	9222500	116312000	7405000	7879450	2355310	19686400	67389500
cg0389	short	short		4811810	3320790	3994550	4000480	3814790	4348320	2023810	3577230	3400860	2377570	4603750	5181290
cg0394	Glycosyl	Glycosyl		981321	800221	750998	1274760	828091		0	0	0	1128300	554526	795756
cg0395	hypothetical	hypothetical		309696	280611	326762	410160		446159	295280		457249	300376		334450
cg0399	hypothetical	hypothetical		20686200	3599120							22007200	1430950		21076400
cg0404	Nitroreductase	Nitroreductase		1575900	1448270	2015180	2112120	2293880	1371780	4108630	2836360	1863250	2515660	2129270	2876220
cg0405	cobalamin/Fe3+-siderophores	cobalamin/Fe3+-siderophores		8128340	4615270	10817200	58948200	10787500	10647000	8060250	10681900	6867100	5407520	8112510	9388000
cg0407	secreted	secreted			653739	135525	563008	308866						227866
cg0409	PROBABLE	PROBABLE						81328.8					87654.4	96082.5	157915
cg0410	PUTATIVE	PUTATIVE		2662440	2975140	3404360	2775590	1291410	3391520	1684760	1469860	1279430	2086450	2033220	2091600
cg0411	putative	putative					1259660				831182
cg0412	membrane	membrane			83784.5
cg0416	secreted	secreted		3856880	5061100	4571080	8380830	6396140	4384030	19295800	8361670	2823040	5389870	4377440	12979800
cg0418	putative	putative		5061160	5408920	6707790	5708800	3823900	5450470	4629530	10203500	6778540	5407440	7023020	6336720
cg0419	glycosyltransferase	glycosyltransferase		0	0	0	0	0	0	0	0	0		497233	144120
cg0424	PUTATIVE	PUTATIVE		2113470	1030110	536360	503271	780333	2369450	848899	1487990	1601930	742136	833045	1691540
cg0438	PUTATIVE	PUTATIVE		1786160	1765440	2108610	1656240	1461950	1652880	1076230	2118090	1413490	1655020	2607730	1841800
cg0439	PUTATIVE	PUTATIVE				44961.2			57194.9	31906.5	57300.2		16987.1	139388
cg0443	PUTATIVE	PUTATIVE		2517760	1562360	1762340	2355200	2541170	2569350	2976840	2541550	3431340	2106800	1857050	2378820
cg0444	transcriptional	transcriptional		1860400	1834090	1750570	2006710	2452160	4008650	1671250	2971610	1610670	959454	1314170	826235
cg0448	conserved	conserved			36502.7	17498.9	91767.5						41259.3		60011.5
cg0450	conserved	conserved		4878340	4957200	6277140	4247220	4315440	5076150	6549380	5013860	7649500	3936730	4199070	4509130
cg0451	PUTATIVE	PUTATIVE		100975	184244	136442	63708.3	180865	134578	159441	114417	162433	75700.2	69211.5	121966
cg0452	hypothetical	hypothetical		126089000	39424100	46174100	102640000	105579000	85864300	74110900	110158000	66999500	34656900	41944600	36062400
cg0463	conserved	conserved			693668	463574	618981	587933	1515180	182361	1211970			1775310	484004
cg0466	conserved	conserved		1542900	1428980	1548410	2754640	3416020	2942550	1460020	5195320	2090820	570954	1674910	865891
cg0467	cobalamin/Fe3+-siderophores	cobalamin/Fe3+-siderophores		1982030	952832	1382680	2900900	978634	1511340	1528820	1234200	971488	878527	855470	858542
cg0470	conserved	conserved		3558840	1900580	3842970	10434400	5545110	9163150	2677440	14618100	3633470	1668210	2749370	1564210
cg0471	conserved	conserved		152058	38514.5	135470	216097	96201.1	177407		244960	81995.5	83103.4	46720.2	114696
cg0472	conserved	conserved		2404740	1903000	387274	609233	1928950	575084	2372830	302554	458937	710649	897013	3113280
cg0475	conserved	conserved		226506000	94089600	107032000	111580000	128393000	188262000	168736000	223190000	156083000	84754000	122235000	171654000
cg0477	hypothetical	hypothetical		613853	1086860	1209880	1276200	1579040	511485	463533	1465980	1051160	374746	1462890	627270
cg0481	PUTATIVE	PUTATIVE		829104	274883	673154	1156510	689922	1229350	488986	2804000	1573680	1460950	1138260	401086
cg0487	conserved	conserved		709509	698457	878417	2027410	641156	682875	784055	1117170	658258	794696	812988	1912360
cg0489	hypothetical	hypothetical		4139270	3555570	4081560	2518640	8138470	3638300	8135170	2414490	4839780	1171620	1986580	4730220
cg0492	extremely	extremely		33646000	18120900	18057300	23529900	49540200	28142400	32819200	78179800	24682000	10823500	15613000	12310400
cg0496	Thiol-disulfide	Thiol-disulfide		9706660	4103540	8441760	7554760	13449100	27820100	5518490	44933000	17964800	5797320	9059590	6479680
cg0499	hypothetical	hypothetical				16554							25679.9	35686.5
cg0500	Bacterial	Bacterial		80948.2	154410	198630	66619.1	40512.9		53352.6			93462.8		38361
cg0505	putative	putative		12537100	5071110	3470620	5501220	8741660	8543210	5593700	11891300	4189090	4555220	3785810	3446160
cg0513	hypothetical	hypothetical				314114	336592		498963		742631		330258		125888
cg0515	PROBABLE	PROBABLE		124533	75727.3	82525.6	129077	85775.1	214696	123010	156692	211240	214572	222335	387827
cg0519	PUTATIVE	PUTATIVE		468753	345886	428858	2161160	570817	519396	1079150	841067	476651	1551610	461013	1295530
cg0520	secreted	secreted					46258.5
cg0523	membrane	membrane		81489.8	44312.8	190892	116639	78071.3	306544	69329.6	244254	142628	168804	220380	62608.5
cg0527	PUTATIVE	PUTATIVE								10317.3					7801.96
cg0528	putative	putative		5521560	3654310	2719700	3356690	4261300	2963830	3355020	3628940	2673880	2909850	4233710	2515950
cg0530	hypothetical	hypothetical		984414	1280230	453841		2540390	565475	536474		1156010	471543	587110	524523
cg0532	PUTATIVE	PUTATIVE			92518.6	321279			384705	75289.7	600313	177459	211827	195522	119606
cg0537	PUTATIVE	PUTATIVE		765105	726758	738670	595607	515799	541608	867824		455766	463097	371756	566661
cg0538	putative	putative		15922100	7753550	8052640	13976600	20843000	18257300	7948900	30073300	21114100	4441000	6145460	6922680
cg0540	PUTATIVE	PUTATIVE		465216	387036	1209840	2141600	538769	596713	1550560	828098	542972	132771	169031	865081
cg0549	PUTATIVE	PUTATIVE			1435340					230438					397920
cg0550	putative	putative		155336	308350	392737	556883	321740	880468	370535	273756	393143	265604	153320	328775
cg0553	conserved	conserved		4388870	2258070	3211610	4335620	11796000	26993300	8014030		21074800	5465020	34247800	13331700
cg0554	GLYCOSYL	GLYCOSYL			22957.4	25938.4	78141.7				57952.7		38589.2		22858
cg0568	Permease	Permease		161340			58403.2	84999.8		0	0	0			131149
cg0570	PUTATIVE	PUTATIVE		190313	150434	118560	72300.7	128273	85441.5	89765.4	139943	117335	135747	201196	170410
cg0575	secreted	secreted		2990750	2913320	2083210	2112120	1826400	2668050	1886610	2057180	1774420	1952900	2675370	1882960
cg0579	transcriptional	transcriptional			64024.1		48619.2						31956.8		63466.7
cg0580	conserved	conserved		4193720	2351650	1784080	5736640	2582990	4304500	1918300	4339610	2382360	932023	1295580	1153090
cg0588	hypothetical	hypothetical		985407	976934	2547330	1406040	948706	1247770	2419100	1870480	1328760	1504950	797274	2781430
cg0607	hypothetical	hypothetical		1912600	1121610	1871740	2022970	5821240	3721010	2445100	3725990	4578260	1268650	1477880	2272220
cg0617	PUTATIVE	PUTATIVE					312840		221037		761166	285562	64016.1
cg0620	secreted	secreted		16002000	2451170	3847770	16449000	10517700	18039300	689189	20643300	5382240	1926680	8012480	3378250
cg0622	cobalt	cobalt		0	0	0	0	0	0	0	0	0	277886	188894	386725
cg0623	cobalt	cobalt		0	0	0	0	0	0	0	0	0	16297.9	12070	9151.56
cg0625	secreted	secreted		70766100	16294500	31537700	103023000	64891400	88960100	21791600	142475000	72943800	31575600	47151900	27449000
cg0646	Bacterial	Bacterial		448416	830357	438571	712214	425348	476831	947991	329879	728083	369315	396626	711955
cg0650	secreted	secreted		68591100	33576000	47861800	104520000	121758000	124606000	47078300	175681000	69574100	33127400	65427000	53520700
cg0680	conserved	conserved		10230000	7375840	11247200	9958300	7449520	10973700	8915930	10724900	9639720	8080410	9057030	8957540
cg0682	ATPase	ATPase		3223890	2801900	2970400	6575490	5333180	5402920	3861770	4433530	4030000	2665860	3502400	2952710
cg0683	permease	permease		707859	1132100	1059160	1158440	540729	1549970	4878690	2016050	720416	2384470	1153780	1628250
cg0685	homolog	homolog			36297.2	40792.8	45251.5			139573			119124	72545.4	116084
cg0688	conserved	conserved			432028	221759	553124	208638	115089	172962			97459.9		123084
cg0689	hypothetical	hypothetical		1142350	89275.6	225373	157095	245739	1152410	445916		787172			248036
cg0697	conserved	conserved		14136700	5930190	6180470	18210200	13850800	12958100	13799500	17415600	16457600	7186320	9765740	8888480
cg0698	conserved	conserved		2142910	2841320		7296060	3745640	2965520	2529740	7291040	4275840	2571210	1430650
cg0704	conserved	conserved		23234800	20834800	21358800	49326600	15455500	19855900	10536500	29034000	17776200	17046100	7575110	14852000
cg0711	membrane	membrane												347050	192612
cg0715	secreted	secreted		1174980	498714	493954	519447	1159220	876396	1583310	2036600	1508000	370735	473716	369090
cg0716	conserved	conserved		877106	406827	360394	249520	611207	599799		1112180	821802	719461	1775300	1022070
cg0725	transcriptional	transcriptional		1616180	1025640	1743030	1691110	1209120	2565880	2531020	1106790	2676570	1603900	1171280	1107230
cg0726	secreted	secreted		41518300	16560100	10882800	26852900	22513900	42896500	8930240	69296200	32409000	7138530	11516100	17294100
cg0727	nucleoside-diphosphate-sugar	nucleoside-diphosphate-sugar		967839	715785	634644	1288580	609224	814468	516349	1025780	754232	1107800	831640	828492
cg0732	PUTATIVE	PUTATIVE		174687	95501.2	74286.1	140262		108994	199726	380280	42897.1	256820	122044	42905.5
cg0733	PUTATIVE	PUTATIVE			518406	323515				1506680				902502
cg0736	ABC-type	ABC-type		1933490	2021050	3547860	3574840	3164100	2025870	9234910	2651190	1385550	4220860	3784780	8400010
cg0737	ABC-type	ABC-type		34332800	41795100	35483700	93238600	64168100	38445600	65637000	37033500	32274600	56173900	79756300	172931000
cg0739	PUTATIVE	PUTATIVE		1852460	1769830	5050730	10578600	2913910	3838520	2462650	5851090	2409180	1837390	4045440	1832310
cg0740	membrane	membrane		306096	330837	137198	223375	250233	234937	7155.97	504032		123642	192828	457760
cg0745	protein	protein		1215750	1358840	1062450	1242630	876483	1793710	812346	518099	1583950	490482	533086	396567
cg0747	Cytidine	Cytidine		131100	36246.6	154063	0	0	0	0	0	0	109929	100529	59415
cg0748	cobalamin/Fe3+-siderophores	cobalamin/Fe3+-siderophores		2496250	1286790	2319290	2383460	962987	2834660	2095350	1328510	1156490	2628920	1203610	1616400
cg0752	PUTATIVE	PUTATIVE		12348100	14677600	14515700	15990100	13888300	16316100	13591400	11026400	12524400	8098970	8343690	8599160
cg0753	secreted	secreted		6386730	2076850	940610	457558	11300800	941488	3840420	994154	1814900	1617750	2630790	4413000
cg0757	conserved	conserved				285442	540333			1048820
cg0764	PUTATIVE	PUTATIVE		215305	160241	167936	235513	219507	231431	144098	264475	222014	193916	242285	239623
cg0765	secreted	secreted		1184560	1259320	2164930	3939750		1752320	427759	929555	690768	1458510	1052650	720852
cg0773	PUTATIVE	PUTATIVE		6009520	8588870	5171770	7938610	5651900	6765990	9014140	6120180	6331160	4450830	5306320	8970740
cg0776	ABC-type	ABC-type		4395830	699599	4400390	4310000	1328570	1483070	4009860	1563630	1107040	1487450	720446	2964040
cg0780	membrane	membrane		3181150	1029350	3338350	4345730	1478310	6130020	3127650	6154330	3760820	620863	1168050	2320930
cg0781	membrane	membrane		12557800	5502630	2660780	15092100	7171130	5182000	3366460	9156950	6560290	2454950	2724120	4886730
cg0783	conserved	conserved		14129600	21177300	42693700	21186900	41214900	30741000	35394100	13925600	26128400	28294300	26322400	44157900
cg0787	transcriptional	transcriptional		1543710	1158980	474944	6239590	659818	2115850	3442120	4071300	1547210	360535	421386	1984070
cg0799	conserved	conserved		506229	414250	149557	186326	397364	185794			253085	162467	232271	224089
cg0806	conserved	conserved		1201820	976280	1194960	693580	785288	1125400	1997670	1760870	753383	2443260	3753310	3102100
cg0807	conserved	conserved		30834300	19347600	24028100	22044000	37800100	21792200	33014000	48499300	34999400	19380000	21961700	14063200
cg0809	Nucleotide-binding	Nucleotide-binding		4801500	2953970	5189820	7985310	5977280	9720130	12146000	6178150	6084250	7801810	5205060	2622570
cg0810	conserved	conserved		46124300	15383900	10532800	36078900	57161600	29768200	23455000	86632100	44865500	10467000	19116500	16565300
cg0821	conserved	conserved			25848		9487.6	23907.1	22366.9		24529.5			35687.7	18737.8
cg0822	conserved	conserved		19350.8	10926.2	519141			544437						14805.3
cg0828	putative	putative		140074	187256			133239		185124		74750.8		83354.6	136325
cg0833	conserved	conserved		111094	209349	190420	242085	164979	171053	157051					142495
cg0834	Bacterial	Bacterial		17523900	9483060	12964000	10913000	10673200	16320300	5918990	7260090	9053890	5883920	4255690	7940210
cg0838	helicase	helicase		1993090	2811640	1423720	1571560	1679890	1606340	629875	1219540	2124720	1369270	1655380	1410010
cg0840	conserved	conserved		12020100	21308300	6998320	27746600	7311900	24986800	9087740	40754000	25760700	4093240	4500630	21898400
cg0841	conserved	conserved		3093800	4827320	1322830	3637910	7670660	6645770	1731960	3118540	4178500	847762	3254910	994621
cg0842	PUTATIVE	PUTATIVE		487027	454282	448269	499564	422817	410832	587029	404008	394995	302157	484221	633848
cg0843	helicase	helicase		714707	975025	687466	434825	668871	1094760	946033	1948550	653453	313300	704170	1207680
cg0844	Type	Type		1080470	1246790	800416	1736500	1448610	878616	359319	1113050	1203030	517919	1237800	1062410
cg0845	Superfamily	Superfamily		823894	1075020	675466	492522	641552	617104	554037	483664	766799	595168	993484	570173
cg0847	putative	putative		8168110	2132690	1888300	3147760	6359930	6399800	1394910	9556610	4994490	5583280	4898100	1302180
cg0852	conserved	conserved		545592	1010340	992034	1418080	746616	1219690	840210	460654	459677	853802	415695	858298
cg0853	conserved	conserved		2403930	1450360	2104160	2060010	2492830	3760980	1380910	1671300	3205150	1656910	2264610	2097130
cg0855	conserved	conserved		5757950	8279120	6718720	10928300	8936040	9092120	5282600	8892390	9306380	2877760	7445060	2924570
cg0858	secreted	secreted		1927700	736353	2178310	17118400	2476090	7473500	6747290	6115640	15902300	1188630	1706660	1670330
cg0859	conserved	conserved		99640500	18867400	28894500	58843800	107691000	90824700	28775500	92099500	108515000	13007600	32409800	15406100
cg0865	secreted	secreted		476371	527749	1025990	968633	830109	1052180	896986	1449970	848657	580746	674775	597976
cg0867	Ribosome-associated	Ribosome-associated		186479000	240836000	208909000	224018000	193774000	163818000	198236000	164023000	147536000	179752000	141095000	144381000
cg0870	Haloacid	Haloacid		5511350	4855180	7252890	7910370	6148680	6035900	7443310	7753580	5272950	2205120	3683720	5472750
cg0871	conserved	conserved		152485000	63922900	97437300	210891000	193390000	227541000	80607700	352728000	168536000	71674100	88494900	61196800
cg0872	putative	putative			586578		837922	635701					473055		507625
cg0874	Uncharacterized	Uncharacterized		2425500	3099820	927885	1549530	1921920	1369160	1336670	5277650	993016	939001	2811440	2747150
cg0877	Putative	Putative		1597480	671770	264981	595182	1097550	1061160		1783310	684494	622520	345137	885291
cg0880	secreted	secreted		679401	303772	313292	343138	423585	849066	185684	882511	265647		225483	321025
cg0882	conserved	conserved		1144930000	427599000	481677000	1694540000	2049070000	1588590000	682230000	3048090000	1717920000	406535000	590312000	482267000
cg0883	conserved	conserved			6997820	10782700	6939710
cg0884	conserved	conserved		3530390	2615250	4909530	3455120	2361210	2859090	3768850	2041710	2902160	2691270	2569530	2140520
cg0885	HELICASE,	HELICASE,		542472	362739	208930	282483	483156	504960	219751		944486	198047	411964	275167
cg0886	PROBABLE	PROBABLE			236413	157845	193002	145322	242555	175479	396173	224525	272422	221247	477772
cg0887	Kef-type	Kef-type		6075520	10097700	5671960	7365900	6369520	7056510	4397500	7072360	7723550	3677840	6336280	8653160
cg0888	NTP	NTP		185964	159948	63524.7	3489.14	350212	140344	125202		130419	124544	200461	162617
cg0889	PUTATIVE	PUTATIVE		241926	65840.4	214511	278481	192608	339720	154317	799866	475976	182948	308852	216081
cg0892	conserved	conserved		51722700	23718200	18521600	18092600	42291100	16974700	28703600	17825300	20447400	14250000	24583200	34050500
cg0893	secreted	secreted		2220510	3904540	2282600	3716700	2960760	2985670	4132470	4800960	3503540	4686530	2191140	3496170
cg0895	conserved	conserved		32932600	35042500	40962300	46134600	46013300	48941300	36731200	56215200	36580700	15518200	23585600	27490300
cg0896	membrane	membrane		5783760	4129090	4619480	4687980	4586370	4228380	5453350	6419320	4356850	3244210	4520040	7759630
cg0898	Pyridoxine	Pyridoxine		75930200	67082400	64952000	56139600	52849200	50753500	68784600	47293800	45658000	41367200	42992800	50008300
cg0901	secreted	secreted		744540	111891	395724	737207	454965	1277950	296418	1004870	918326	931810	1146030	554114
cg0908	putative	putative		271696			808962		219079		829156	314136	72070.8		165055
cg0910	Inositol	Inositol		959728	883462	1291800	2623810	822443	1461770	909095	2172100	1070380	867409	1162350	1006150
cg0911	Inositol	Inositol		753712	535713	801178	316685	1194550	955174	941397	587657	1272790	1069740	1308760	577158
cg0918	PUTATIVE	PUTATIVE		90847.4	120290	39276.6	115411	74797.2	19805	17283.1	208597	128501	95169.1		99095.7
cg0922	ABC-type	ABC-type		324130	154738	468176			456834			484735			62799.3
cg0924	ABC-type	ABC-type		49911800	12744400	23365600	41472600	18379200	46064500	18382500	12146800	24920100	16583400	19081500	15316700
cg0926	ABC-type	ABC-type			572158	355065		348279	1121560	601325			463312	1003730	650258
cg0927	ABC-type	ABC-type			2466420					2378080		2287170	1644450	5951510	1493240
cg0928	ABC-type	ABC-type		58414.3	45863.8	86553.4	47978.2	53277	302526	99642.5	100018	65697.6	406550	97907.2	376416
cg0931	PROBABLE	PROBABLE			382932	357227	216737	648324	277895	478982		536161	298648	404496	298012
cg0932	membrane	membrane		557588	100210	117121			182250		179842		124410	170499	307162
cg0933	DNA	DNA		130127	205108	221017	562057	142935	216152	288129	687128	258970	259760	262123	322168
cg0934	conserved	conserved		997420	1352480	1004130	871685	630452	958075	1398970	695656	1371940	589383	780460	900155
cg0935	conserved	conserved		614554000	136992000	300920000	683790000	908396000	362681000	511880000	705664000	781202000	291973000	383633000	302356000
cg0936	PUTATIVE	PUTATIVE		181809	106078	143062	129761	301630	161309	126983	302025	346671	67317.7		183375
cg0938	Cold	Cold		567219	753300	1191890	1830280	807031	816853	2100820	1474290	688642	1652530	988709	1279730
cg0940	GLUTAMINE	GLUTAMINE		483747	354082	526878	620456	709896	563743	627235	652787	255469	1111380	899550	902800
cg0941	hypothetical	hypothetical		79490.1	56678.2	213149	275377	87853.9		209570	198675	70061	186937	136193	187942
cg0945	23S	23S		4077340	5840270	2881720	2157870	3780020	4882140	11372600	5266100	3886980	2434880	3749590	13212500
cg0946	conserved	conserved		496547	291690	516779	460583	683600	476374	480509	917483	299460	193612	371240	193009
cg0947	conserved	conserved		19026900	7231960	11700800	18538500	8986300	12801500	15593200	7782060	8418340	10111700	6202810	5112040
cg0952	PUTATIVE	PUTATIVE		1406300	3228460	5816440	1678020	1312390	3306190	2008050	2481230	2146920	2918620	1663760	3529530
cg0953	Na+/proline,	Na+/proline,			1245550		255871	439371	438178	1069540	342804	450427	618511	842749	556700
cg0955	secreted	secreted		50955000	16736200	9048330	30114800	16288400	33840600		87922100	27285300	5752850	11571700	12362400
cg0961	alpha/beta	alpha/beta		0	0	0	0	0	0	0	0	0	164627	196299	98259.3
cg0963	hypothetical	hypothetical		431182000	214195000	168288000	549935000	532137000	269210000	242234000	480176000	244761000	65162100	105712000	153395000
cg0964	Glutaredoxin	Glutaredoxin		23879800	2101640	2463710	7086720	6092100	5984760	4500120	11000600	6338440	1963100	2650620	2488670
cg0968	PUTATIVE	PUTATIVE			26414.4	45376.6	18455.9		45974.4	51876.5	60032.2	25256.4	53524.8	10801.1	53665.1
cg0970	membrane	membrane			185862		69544								152501
cg0975	putative	putative		16067400	6730900	8034540	15381700	21166000	14856800	6387950	19919600	10819000	9723890	15298600	9757190
cg0978	ABC-type	ABC-type		632241	2645240	553579	1092450	498572	885945	474542	1031540	537895	579281	562285	466438
cg0980	secreted	secreted		11208700	4585820	5403690	16844500	11530000	19561600	5354400	24595500	9980000	6038390	7188360	5812340
cg0987	conserved	conserved		929660	344188	705102	342017	493095	878762	1278240	505874	595849	989573	636949	406275
cg0998	Trypsin-like	Trypsin-like		0	0	0	22183800	5093390	9451520	3988220	18454100	7123490	6103680	9241010	5644360
cg0999	PUTATIVE	PUTATIVE		509169	347372	613535		425134	596344	682885	1081820	576259	638112	640568	282998
cg1000	conserved	conserved		131030	76953	114191	155585	97422.5	104678	69694.3	235146		109116	106275	84594.7
cg1006	Acetyltransferase	Acetyltransferase		14141.1		38734.8	25489.6	64485.8	56208.6	38006.6			15537.7	25063.1	58591.9
cg1007	putative	putative		1329220	977402	718713	1798640	1143520	1410150	1188600	1210790	1414020	2032680	1496730	2604570
cg1010	putative	putative		1124450	856564	2057350	2778980	984466	3597970	1492880					501074
cg1012	CYCLOMALTODEXTRINASE	CYCLOMALTODEXTRINASE		207636	312434	477650	0	0	0	0	0	0	0	0	0
cg1018	PROBABLE	PROBABLE			24173.1	10806.6	5688.71	13248.4		6813.78			17894.4	34183.4	26863.1
cg1032	Bacterial	Bacterial							391123				673292		97586.2
cg1037	putative	putative			85523.4	91098.8	144954	310578	401139		521881	295956	235728	552550
cg1039	PUTATIVE	PUTATIVE		739242	1265950	978213	932089	1252920	1437510	1115480	1926300	1645370	1097910	1115500	800527
cg1040	ATPase	ATPase		1656740	1749660	1811350	1949220	1208610	4008980	952950	3620740	2719450	2186650	1401020	1093590
cg1043	Thiol-disulfide	Thiol-disulfide		8171020	9017080	10352500	8109470	11560800	15143900	8488850	11429700	7138180	2914060	4414970	3044770
cg1044	conserved	conserved		7338650	3436690	3649160	8986330	6837070	7331220	2512200	9340970	5159920	1843860	2575690	4659280
cg1045	conserved	conserved		2877020	2427770	3489020	2321260	2272670	2665840	1559150	3455040	1635690	1543770	1891550	1371560
cg1048	Haloacid	Haloacid			4232.35					8115.4			6460.55		8086.98
cg1049	Enoyl-CoA	Enoyl-CoA		698441	390681	993090	2446810	496491	734949	378466	1147640	667196	566577	820006	291418
cg1051	hypothetical	hypothetical		18011.6	692703	66188.2			34672.2	732540		46832.8	43273.9	73881.2	844175
cg1068	PROBABLE	PROBABLE			785083	940754	3996.36	793779	961833	1045830	1434920	1108200	748895	948657
cg1070	conserved	conserved		2925310	1653000	4747580	6795760	3870400	3217320	5348620	8971950	2757500	1831870	1463850	970942
cg1073	Predicted	Predicted		1860550	795897	745889	1050820	1893390	1669610	695037	1632860	1697380	921949	687755	1027180
cg1074	conserved	conserved		203957	513249	196349	333475	236665	302101	92723.3	458419	157009	369273	370489	231538
cg1080	Putative	Putative		1373050	1203160	1149130	1736320	716442	959968	888752	893903	862414	644501	850070	856672
cg1081	ABC-type	ABC-type			170643	331982	439066			225113			257455		274010
cg1086	putative	putative		38832.3									18785.6		20556.2
cg1092	putative	putative		860019	354971	957499	1273670	1324360	1993560	857793	1953390	1091330	1018480	445217	1005380
cg1098	Bacterial	Bacterial		921177	804726	1651630	969239	3869880	6390010	735602	5214540	3590760	372087	2588830	1605950
cg1100	ABC	ABC		24674.2	20808.5	59347.4		32138.9	49201.4	51943.1	55060.3	36133.5	61779.6	54994.2	23995.9
cg1101	ABC-type	ABC-type		94784	106742	108758	228809	346105	261908	165287		111950	215990	301861	206849
cg1106	hypothetical	hypothetical		50888100	21060000	40426000	111352000	98284400	67505700	37729700	175909000	50581800	22336600	47564600	22100500
cg1110	conserved	conserved		1123590	114305	472153	220626	335958	991345	379490	278206	592854	234627	274016	286942
cg1112	Septum	Septum		1056130	1330770	914386	678767	1130380	1311060	705148	1056840	1686650	1650090	1477750	748603
cg1113	conserved	conserved		8131130	15225600	9342820	9282330	8588330	15643600	7494760	9537860	8666470	6948350	17284000	6963280
cg1121	Permease	Permease		6977510	5489640	12340800	2840810	8668720	2772350	0	0	0	5198020	7492900	9454970
cg1125	conserved	conserved		380065	298192	366871	1274890	669294	355964	434823	574456	817216	318527	1172710	1112810
cg1127	Uncharacterized	Uncharacterized		3161010	2766050	3279050	5629940	3584540	5810940	6333340	9010540	7908550	4180290	4766630	3340680
cg1128	similar	similar		4084200	7527400	4774480	3710090	4475010	3832350	4796970	3604470	5563920	5401540	5964010	3797390
cg1131	conserved	conserved		916710	805347	2450640	2291160	2286160	1606030	1539380	1200510	1484170	1408990	2055380	1928790
cg1136	conserved	conserved		10363800	10689800	18564900	22488900	13985600	14984600	15161300	23726600	11030500	8946240	13140900	19734500
cg1138	PROBABLE	PROBABLE		466541	570831	908077	901118	1175400	438412	2022110		487599	973212	727259	359732
cg1139	Allophanate	Allophanate		7002240	12434200	8779010	5350230	3023550	5574280	4118930	3763930	4160780	1681750	2339450	1283700
cg1141	homolog	homolog		2419340	2997980	2668420	3125440	2184880	3761720	2091540	6204300	2739490	1842600	1714490	2345620
cg1142	Na+/proline,	Na+/proline,		4550610	2065430	3271860	10906100	5588740	8850650	7956380	12886100	8978980	2880240	2534030	8233040
cg1143	PUTATIVE	PUTATIVE		106554	248182	88611.9							111933		56948
cg1144	hypothetical	hypothetical		2005010	1249760	4281370	2257350	1914270	3988040	5675140	1810720	3001400	4002870	1765640	3393540
cg1147	Conserved	Conserved		0	0	0	0	0	0	0	0	0	1424940	3160880	5320970
cg1150	NADPH-dependent	NADPH-dependent			112321	33174.6	1071840			64615.2			207074	159346	151883
cg1158	putative	putative		531492	410133	309088	735796	774771	478202		1219510	863437	403454	493229	986662
cg1165	Gamma-aminobutyrate	Gamma-aminobutyrate		1051050	1033730	351461	611318	445614	804727	0	0	0	362150	277686	289138
cg1166	putative	putative		36650.4	61931.3	53779.6	32483.3	62829.8	64361.9	76895.7		73304	62608.4	94574.4	54721.5
cg1167	putative	putative		974632			1541860	842558
cg1171	Predicted	Predicted		22224500	39339700	24339300	18453600	17649300	32725700	21904400	28661900	27014000	29126200	31907600	35833100
cg1182	putative	putative		217696	78501.4	188620	195565			211647		206026	227981	122928
cg1190	hypothetical	hypothetical		4156820	2663770	2181300	14861500	5929380	7164360	3130380	18397200	6642980	1052420	2139320	2754940
cg1191	hypothetical	hypothetical		278012	196530	669050	492089	474973	301703	586148			211298	439666	502331
cg1202	conserved	conserved		801397	1119520	1346570	889139	946027	777538	780531	1085650	963608	766934	639138	1777910
cg1203	Mg-chelatase	Mg-chelatase		7763230	8394010	16302400	12792100	6818640	9632850	5989620	7909630	8926600	6480300	7767180	5598240
cg1204	similarity	similarity		186138	176983	221779	77069.4	152449	186654	0	0	0	125942	81276	88802.3
cg1206	PEP	PEP		197284000	176669000	168854000	209214000	163953000	176745000	183673000	129972000	164526000	132646000	134904000	137896000
cg1207	ATPase	ATPase		994106	676269	428075	607277	193160	150709	192487	182980	160464	496513	508288	315250
cg1211	PUTATIVE	PUTATIVE		816692	1203210	1183570	851512	835714	1146790	545200	909688	689684	540936	499323	568211
cg1220	Predicted	Predicted		3793650	6919630	1406350	5174440	1925150	4970980	13736900	15218800	3669160	1135390	2047510	11762400
cg1234	putative	putative		882716	1032000	640138	783840	957096	839024	610415	802722	809444	662713	785324	800061
cg1238	putative	putative		5162520	5708050	10795900	5449110	6031680	10090100	17158400	7414570	7707740	5521160	4437710	10586200
cg1239	SIMILAR	SIMILAR		1338640	1329300	2001580	1419310	2615430	2736050	2385960	2563760	2641090	1179510	1616330	1606790
cg1240	hypothetical	hypothetical		11818400	11013000	8202230	11133800	10297100	8898480	7453050	9841300	6568120	6274480	6170220	7250520
cg1243	secreted	secreted		8196480	3233150	2372770	5305690	17971300	3181290	5474070	9314320	4163480	2044310	7220570	4960170
cg1244	Arsenate	Arsenate		19151900	7086600	15493700	43994000	37753500	18327000	25549700	22292400	17731100	6278090	17110000	16175600
cg1246	conserved	conserved		1577700	1256550	1179650	1325920	825215	2540520	860874	691319	1714320	802777	957940	606264
cg1247	putative	putative		25236800	14819100	2406530	3561930	52500000	5566170	18305200	6529450		1424660	11056300	14474900
cg1248	GTPase	GTPase		19212400	17376200	18271900	25200800	15570600	15858000	17433300	24854300	18264800	17611300	14908200	19050000
cg1249	ABC-type	ABC-type		10851400	15102300	6824100	8380880	9457410	11827800	9850950	36551100	7459970	12669100	10492200	15666900
cg1250	Uncharacterized	Uncharacterized		735080	632229	497333	658104	770235	452475	800655	426253	522126	748435	941130	836424
cg1261	Lysine	Lysine		3630770	3048980	2168220	2662290	1627180	3365500	2017200	2763900	1984520	2649860	1680100	2300410
cg1264	conserved	conserved			4278.07	8269.41			8444.45	6918.91	12765.4	7461.9	7139.65	6444.78
cg1265	conserved	conserved		192922000	63364800	79800600	213901000	289206000	274108000	103194000	416449000	238086000	56289000	123233000	87433800
cg1270	PROBABLE	PROBABLE		32155100	12673900	15411600	14158100	11980700	11295100	12763900	20875900	15081300	11645800	17703300	9567630
cg1272	conserved	conserved		2494990	701699	429966	1127990	2104840		2125190	3221240	1888530	933477	741718	935950
cg1273	conserved	conserved		6956510	3787550	10429000	20762700	10726500	22437700	17442100	35851400	12701000	5858220	9968050	3258690
cg1275	conserved	conserved		1502540	642038	552924	488307	1325810	680696	390048	631603	1433610	297146	1417720	314113
cg1277	conserved	conserved		3528180	3627830	3706840	7015760	8374670	2706300	10088100	10310100	2500640	1452460	4688390	1747230
cg1278	conserved	conserved		1578470	1009940	1428280	1710580	3563170	3525950	1297380	1519020	3105590	1574350	3005520	1080290
cg1279	putative	putative			9724.23	16290									18212.8
cg1282	conserved	conserved		564900	179710	383135	396307	513265		469888		175321	167615	178275	278024
cg1285	conserved	conserved		870182		756901	101740	355354	367126	2838030	350084	750895	1005350	220801	242175
cg1286	conserved	conserved		5021210	2222200	3564160	3380300	6334930	4521030	2855750	3278990	3488130	3205920	3169190	2645990
cg1295	Predicted	Predicted		313033	399396	95387.3	121359	121752	580508		143758	376898		115188	180903
cg1303	NTP	NTP		112191	233649	123069	104671	71424.3	327938		579820	212667	407627	158272	79712.7
cg1304	putative	putative									30339.8		9674.48	22787.3	9702.33
cg1307	Superfamily	Superfamily		175399000	259851000	214793000	266273000	264615000	199693000	357893000	223699000	225690000	180459000	170732000	265895000
cg1308	Bacterial	Bacterial		1108040	534787	610329	911739	1554030	824385	1064780	1770220	494234	845554	715470	2875170
cg1312	putative	putative				3465.62								6145.29
cg1316	Superfamily	Superfamily				26515.3	16011.2		26445.1	23986.6	82823.1	25026.6	43161.4	27202.5	136447
cg1317	putative	putative		3066780	1045620	2061670	1622230	1595240	3570610	1744030	3493120	2054600	1332420	1748990	2470130
cg1318	DNA	DNA		121912	120727	137177	319703		178676			129937	77408.7	54139.6	51593.3
cg1322	conserved	conserved		9333660	14858200	9917200	6182110	7180950	9398940	7704370	7800830	6291110	5238240	6459910	10567600
cg1324	PUTATIVE	PUTATIVE		11360900	2734270	2894220	4795770	8278840	4069860	3157360	10478800	6407340	2269410	9410020	2680630
cg1326	hypothetical	hypothetical		1987690	2544060	1729050	2424990	2303790	1724750	1217870	3525530	2277820	680309	1470650	826992
cg1327	Bacterial	Bacterial			75118.8	24430.1		29776		25316.3			21033.9		36069.5
cg1328	putative	putative		50370200	1903000	6600340	30395900	27947700	6368270	6055440	10769600	20143300	5728200	2985910	15623800
cg1332	PUTATIVE	PUTATIVE		516229	413885	353659	245150	1345040	1165030	165405	864920	1770170	231480	283362	313231
cg1340	conserved	conserved		4721340	2563550	582707	220257	7473310	483971	4470980		707798	888151	1105380	2531060
cg1349	membrane	membrane		83877.5		159742	137871	167226	165065	32251.2	110488	193081		151755
cg1356	Predicted	Predicted		1594110	415423		261281	826730	1137210	392388	1413040	1345030	432224	1311090	377389
cg1358	Putative	Putative		11279000	20327700	11349000	8184350	18526700	12445700	15908900	31170700	9888710	7449190	19179400	13349500
cg1370	conserved	conserved		5373630	4588420	5872190	4578180	3754380	6220540	5640020	3276360	5024330	2286930	2515310	3828120
cg1371	Predicted	Predicted		1094110	721536	557643	2520440	1141260	753821	1094870	2694090	890860	672064	755416	1331440
cg1372	conserved	conserved			24431.3		41890.9						32968.4		35686
cg1373	Glyoxalase/Bleomycin	Glyoxalase/Bleomycin		181517000	116505000	113851000	147818000	190755000	110116000	109449000	136075000	120162000	45945600	59928000	90603500
cg1374	conserved	conserved		21992400	1162300	1714350	11097500	10297000	3223480	2697940	3181840	2659230	1124010	1444720	3433890
cg1375	PUTATIVE	PUTATIVE		4072920	5596660	2849780	2655390	2205750	4426120	2727570	1715050	4078710	1899920	1716590	3306900
cg1383	ABC-type	ABC-type		24293700	21498600	35377000	25208500	21476500	18073100	25263400	13882900	17420600	18120200	12107400	20050000
cg1384	putative	putative		2006590	1926180	2365810	3533990	2120200	1823610	1737430	1379660	1665620	1635340	1411040	1950550
cg1385	SAM-dependent	SAM-dependent		169363	180589	307204	110348		358801	259937	385549	193965	274641	163510	288934
cg1392	TRANSCRIPTIONAL	TRANSCRIPTIONAL		158295	98914.5	391579	324582	149599	158815	225616	184930	168669	54845.1	77200.1	262213
cg1393	Acetyltransferase,	Acetyltransferase,			715378	709247				648688			0	0	0
cg1394	putative	putative		244636	490237	478200	306453		260353	413365	569915	142480	567868	358807	453491
cg1395	conserved	conserved		5235140	9801230	8027190	8105660	7277810	5584700	6053550	10151800	5474760	2897190	5787280	4488290
cg1397	TRNA-METHYLTRANSFERASE	TRNA-METHYLTRANSFERASE		404928	276269	292890	359015	417444	356034	627048	1035660	504493	251954	512462	513387
cg1398	conserved	conserved		3419210	1219580	2440470	2426430	1989740	1877140	2558450	2239240	1571180	1996170	2350100	1329480
cg1400	putative	putative		442826	734706	751699	864459	706511	631250	593133	876409	558826	602001	987616	754143
cg1402	conserved	conserved		54172300	63030900	91528000	73688300	82143400	44088900	66754100	47675800	52016100	42077500	52663400	73637500
cg1408	putative	putative		247287	241068	147979	618426		267490		521949	259058	172275	260924	185318
cg1410	LACI-FAMILY	LACI-FAMILY		4772640	14240400	12090500	6719260	4643430	9212550	4311700	9133840	9997870	3640750	5466520	9483020
cg1411	ABC-type	ABC-type		2175520	3056160	1599460	2144770	2914020	3455580	3168480	5004450	2405970	1476540	2209050	2956390
cg1413	secreted	secreted		588215000	262236000	319704000	284499000	429632000	285434000	258962000	363282000	240754000	172354000	193780000	295389000
cg1414	Uncharacterized	Uncharacterized		5544820	12846900	5137360	4363360	9375490	6497530	4299850	8396520	5302930	3456940	6791020	2352330
cg1417	Acetyltransferase	Acetyltransferase		355205	322934	319405	676314	585735	393244	311162	709296	346257	575124	988736	634656
cg1418	ABC-type	ABC-type		4846630	6913450	6590750	7602360	11488600	9001390	5847660	8368170	11834900	3609940	11226400	4415060
cg1421	putative	putative		1673020	1394780	1666040	1965120	1299380	1903740	2533650	2134560	1704100	1233320	1814660	1500550
cg1423	putative	putative		10477200	21187900	13372000	12860100	12953300	10481300	10592400	13320700	10098900	8861750	10161500	10415100
cg1426	PUTATIVE	PUTATIVE		866576	856219	1155290	802652	1051280	425865	863712		529641	563077	430727	545389
cg1429	putative	putative		9304870	2349560	6027830	9745470	8700020	13019400	4766950	10844900	9025890	2735440	2802390	1986280
cg1433	conserved	conserved		682976	888408	1516720	1039960	1203720	1018400	1266050	1459530	847015	562911	1111080	852654
cg1444	putative	putative			636729	552259	507999	486316	540827	859916	467221	543047	292276	308096	242561
cg1448	conserved	conserved		2954630	2338570	4251070	5339430	4195900	5444290	3662940	9911050	5288960	3287370	6054870	3328410
cg1449	conserved	conserved		4535940	3489350	5472080	2452920	4729480	5311060	3573670	4200500	5037140	3385920	5807580	3229550
cg1452	hypothetical	hypothetical		9654870	2365480	3264520	5423980	4746770	2924920	2634690	5680770	2579150	1095050	6747510	2047700
cg1454	PUTATIVE	PUTATIVE		249487	1210850	221023	1197290	656779	411921	539417	401069	447724	255787	314416	410763
cg1456	Predicted	Predicted		2724270	1502450	2112290	3657260	1998180	1758070	1757530	1493700	2260230	1248880	1575750	1973850
cg1458	2-HYDROXYHEPTA-2,4-DIENE-1,7-DIOATE	2-HYDROXYHEPTA-2,4-DIENE-1,7-DIOATE		5309730	6369680	6029710	8459300	2966160	10560400	3704000	14453200	8661040	7518830	14156400	11754300
cg1459	SAM-dependent	SAM-dependent			504093	232122	797801	555831	434405	1157240	1158310	294188	578954	661047	624061
cg1464	PUTATIVE	PUTATIVE		184285		164185			314333			200714	118492	170656
cg1474	putative	putative		545535	203726	136429	155595	241698	822287	227581	537118	340500	66204.4	112785	171571
cg1486	Bacterial	Bacterial		1019880	454210	724945	971455	622762	961003	536748	549071	595570	840396	767314	783746
cg1490	NTP	NTP		506019	434362	479174	553150	301056	683862	392981	773650	401888	413974	563025	406973
cg1494	putative	putative		142680	69957.8	67767.5	56941.4		121523	89995.7	222726		125706	133116	37834.6
cg1497	Predicted	Predicted		204086	210171	197787	268091	252241	293760	663335	385964	280879	395976	273498	149153
cg1499	similarity	similarity		4972700	4329850	11421300			11186000	0	0	0		5661720
cg1500	N6-adenine-specific	N6-adenine-specific		13569400	27147700	23233400	13993500	22559800	13597500	18596600	10693000	18948800	10793300	18543400	20405000
cg1502	ABC-type	ABC-type		2549260	2142540	1616490	1026750	3276210		1693220	4099210	1343980	1717410	2759130	2572270
cg1503	ABC-type	ABC-type			281181		360215		1549080	599218			1413190	589932	553534
cg1504	ABC-type	ABC-type		7309670	641093	1985090	1925670	1823630	3409270	642294	1638390	5214550	3767600	2791310	695207
cg1505	putative	putative		2724170	5492880	3409260	1316920	3760670	1858780	4521450	2432460	2921110	3085290	3874690	3470490
cg1527	hypothetical	hypothetical			139019	198377				160767			157808		132668
cg1538	Dephospho-CoA	Dephospho-CoA		73077600	55104400	72365000	39507700	78667400	49302000	67089300	40484000	42496600	26219900	32775900	39983800
cg1548	conserved	conserved		36016.7	61430.7	23471.8			66074		101980	83634.6	37837.6
cg1552	Predicted	Predicted		138147	244208	168697				96753.3
cg1553	Predicted	Predicted		3712220	7055720	6597360	3587390	5155730	4069660	2737200	4640270	3789340	2780440	3302110	3135450
cg1555	Superfamily	Superfamily		1004170	1039090	835065	1532800	1415730	1401600	975726	4097230	2605630	1431710	1323770	1507710
cg1556	conserved	conserved		53770900	70048800	57277500	80910900	99927600	89475300	70187700	68811500	88641500	72946200	65397100	62331200
cg1559	Zn-dependent	Zn-dependent		3063980	1930260	3886060	5630130	3902690	4903740	3022140	5713210	2945150	2979440	2784850	2611550
cg1562	putative	putative					1324520	1087100	817079		1677490		725924	717978	1042700
cg1577	putative	putative		379366000	110680000	141022000	396053000	477366000	339282000	122431000	607103000	259575000	110528000	192232000	141295000
cg1589	putative	putative		921426	729287	2110630	1575500	786300	1581220	1219410	1570940	1303270	1067300	655330	585724
cg1590	secreted	secreted		7045010	6918070	4957100	4947700	5353430	5456620	3999990	3129550	3503370	3399800	3239840	3937260
cg1591	putative	putative		2641720	2024430	2326960	5342070	542100	6364880	4327470	4766550	3772720		848850	3647460
cg1592	conserved	conserved		98516300	42821900	29863800	49669800	164781000	98851700	44094100	66340100	60743500	20233800	71132800	56708400
cg1597	conserved	conserved		5691170	5413690	5607560	5975870	5890390	4248290	4949800	4368900	4193200	4120050	4583590	4296060
cg1598	sugar	sugar		5366230	8414630	4307330	4395300	5191710	5795200	2845020	4099390	3526790	3122890	8981220	4656130
cg1599	hypothetical	hypothetical		2118380	1973370	1180830	3373510	2936070	2677850	2364150	9755810	3121830	1400150	3086160	2417790
cg1600	Predicted	Predicted		821638	1481330	1299660	694935	602107	1287130	408910	975423	730022	692066	797785	869931
cg1603	CONSERVED	CONSERVED		12807200	15548200	20387900	11975300	13076700	20150100	13908200	24454300	19544700	10308200	11918800	10393700
cg1604	putative	putative		4723610	2768560	4569690	4117410	4892640	7559690	5667700	8843620	5265660	4194210	2992880	2073890
cg1607	NTP	NTP		187090				103443			150842	116530		236056
cg1612	Acetyltransferase	Acetyltransferase		62957900	58475100	103967000	74178900	62278500	58849000	53243400	46214500	71670100	51932800	43935200	45335300
cg1614	CONSERVED	CONSERVED		267755	233351	354294	243368	282721	376484	515778	483740	525183	384880	441630	282834
cg1615	16S	16S		5131170	4334640	5242940	5055200	4924110	4905840	9369840	4309360	7029600	6138230	4789380	6328700
cg1617	GTPase	GTPase		6756550	9056410	10074200	7068980	4816780	6291210	9155920	11958600	6093560	6768630	8369200	9206210
cg1619	putative	putative					315364	471075		282067					139783
cg1626	conserved	conserved		8732280	5669090	19966100	37433700	6866950	11193600	12526600	10453100	4187330	9669400	3501870	3988950
cg1630	PUTATIVE	PUTATIVE		150784000	65709200	72536700	138457000	217617000	151432000	137298000	218087000	158571000	59070500	63155700	77601400
cg1631	hypothetical	hypothetical		6323790	3536240	5544060	8383090	3657730	8468600	9277820	6884520	7971700	6763490	6335470	7340070
cg1633	Predicted	Predicted					12339.7		12146.6	25703.3		30592.1	43901.6	37296.7	42041
cg1635	putative	putative		356845	60383.7	60251	327644	226940		89853	133370				99271.9
cg1636	putative	putative		40999000	15179300	49369800	72079900	38706900	74397400	38968100	44159400	27703800	21576300	18068100	16295800
cg1638	conserved	conserved			2735920	1218580	1607900		546927		1751620	1344610	5185930	3372850	1574690
cg1639	membrane	membrane		1056380	1242900	625784	1089500	1588740	786698	548748	979020	409260	985325	1543080	274926
cg1640	membrane	membrane			123553	91141.6	110751	52133.7	189001	307623		151286	149172	102898	105780
cg1641	Superfamily	Superfamily		6628920	11815100	6096790	6486060	6133850	7330020	10437100	5016970	6983150	4951500	4473180	10404600
cg1644	Uncharacterized	Uncharacterized		2147390	1975940	700727	471835	2154260	658726	3658410	1822080	863100	757894	894049	2254530
cg1645	SAM-dependent	SAM-dependent		9768190	6564790	18453200	13323300	7148750	10548000	9887260	21115400	8575900	10805700	8443710	5372840
cg1648	transcriptional	transcriptional		1579700		489283	451089		433822			805095	652327
cg1669	putative	putative		2552570	8373450	4257580	5502520	5176290	3692340	3019210	5785840	4782260	4919890	4788830	5159800
cg1670	conserved	conserved					6530.7			5619.99				6959.23	2938.78
cg1671	putative	putative		68170900	35208800	42828100	49342900	53766900	60485200	39755300	53755900	56149800	40060900	68993000	49585700
cg1683	Superfamily	Superfamily		6114910	6578020	3841300	7768320	3400280	3725330	8601150	6264560	5165290	4458860	4030160	6703860
cg1686	Predicted	Predicted		1370460	634080	870454	242254	1979120	1562660	1320870	1094540	1097150	613845	856157	478743
cg1688	Putative	Putative		317353	1298610	416418	129990	355267	449743	502522	597114	461854	276585	400861	663080
cg1690	Putative	Putative				282230	235060						245397	198899	180897
cg1691	ATPases	ATPases		4059670	5286810	4139420	3230810	3728350	6868050	3214110	5325630	2354030	2627560	3177800	2881430
cg1695	Putative	Putative		2157930	1326090	1484020	1873350	1771810	2558230	1257420	3867880	1448990	973355	1342370	2360680
cg1700	putative	putative		2284220	994444	2023970	987185	1670040	2072190	1160630	1721210	2488430	2760620	2868520	1634990
cg1702	hypothetical	hypothetical		648893	354558	502746	397388	629050	408570	550437	457921	466816	356998	373076	444592
cg1704	Bacterial	Bacterial		625591	436483	460908	933802	809895	903292	747747	865044	820556	449011	987603
cg1706	Low	Low		3059330	3997370	6484380	1839620	1992300	6861580	3497580	12848400	3647360	2415160	3949240	2249670
cg1708	conserved	conserved		34962400	9595680	16437900	16563300	24912500	40686200	13552500	27988100	25277200	6418620	20763300	13146500
cg1711	oxidoreductase	oxidoreductase		55676.3	94760.6	34403.6	0	0	0	0	0	0	0	0	0
cg1718	Phospholipid-binding	Phospholipid-binding		4473010	5649000	8540110	4734520	2761730	3675530	4015440	6609900	3476650	3793580	3748270	3206150
cg1722	GCN5-related	GCN5-related		1659380	4428890	2497160	2394090	4152540	2428500	2596970	2364110	4269290	1637510	2424220	1664090
cg1724	putative	putative		1839670	3149850	1876040	5549550	1895840	2083350	3570920	4768590	1904520	1460590	883990	970675
cg1728	conserved	conserved		4924200	1489060	3384460	6191100	1901200	6528220	1927370	5720270	3303180	872458	1201000	2271660
cg1730	secreted	secreted		4870410	4070070	3770220	1520870	1963620	2449210	2534660	2160650	2117610	2435870	2493200	3036830
cg1732	conserved	conserved		735680	944478	2961750	2154430	980362	992704	1049550	1938580	562348	845600	2011530	1573470
cg1733	conserved	conserved		679119	554702	926009	1322130	690531	799643	595066	992323	784138	680755	1046960	583213
cg1735	secreted	secreted		7534690	1685670	2498720	5854450	5653360	5809220	2467110	9195090	3554490	2720500	3887690	2262570
cg1736	putative	putative				46443				58537.3				39521	53537.2
cg1739	Glutamine	Glutamine		3077950	5202310	3683880	5116810	4461880	5521470	5674110	9949280	5829480	2788540	5636400	5587020
cg1740	putative	putative		18207300	27333800	23893600	18986400	21686500	29346900	27967000	17818700	17275900	11440600	13928000	11792100
cg1743	conserved	conserved		14430700	8671130	9146710	15846900	27053600	29214000	10935100	27842400	20748900	6135010	7529530	8644390
cg1753	ATPase	ATPase		8664830	9196350	10751100	23055800	18441800	12802500	10239500	23058400	13683500	9890130	16577400	17821000
cg1758	putative	putative		204306	87527.9	89301.1	132011	151570	278643	86770.7	282008	177556	148427	170250	148798
cg1759	Predicted	Predicted		28060600	8833710	7342800	10203100	21654000	13924700	13807200	21845800	23324000	14629100	20840100	5791590
cg1760	NifU	NifU		1566260	760111	275744	327134	1485520	317643	731765	248546	645813	333277	561644	1179990
cg1765	Predicted	Predicted			11532.2	12355.1	58435.7	13832.9	18490.9	12851.7	18211.4	17381.2	12174.4	15526.2
cg1767	ABC-type	ABC-type		885179	514922	1280330	393761	389860	791048	769879	639539	580466	391490	461405	888167
cg1768	ABC-type	ABC-type			30146.3	35339.2	35444.9								42801.1
cg1792	putative	putative		2136690	2809430	3226930	3595570	3809110	2789760	2338390	2129860	2570350	2936810	4560450	2788790
cg1793	conserved	conserved		4321250	4425270	4007820	2398460	3605490	6691680	5750070	4984500	4288630	4023260	4099850	2920650
cg1794	Uncharacterised	Uncharacterised		608609	570006	528552	818206	770340	1133800	936663	1455750	1347700	468930	1977840	642164
cg1819	nucleoside-diphosphate	nucleoside-diphosphate		1465820	3717730	2626180	2582040	2166850	586964	2283700	2886480	1329700	655790	786336	1514640
cg1821	conserved	conserved			43286.1	36976.6	574342
cg1823	hypothetical	hypothetical		5701900	2966370	2286960	8699990	7952160	7078800	3591750	10270400	8421850	1514730	3269340	2913930
cg1831	Bacterial	Bacterial			245528		353698	304677			869744	323439	246095		338585
cg1833	ABC-type	ABC-type		843036	881778	705856	735826	935722	1405500		1454370	716535	887016	878409	939758
cg1834	ABC-type	ABC-type		128628	317457	377192			248963			120823	225187	198489	49834.5
cg1836	secreted	secreted		1171430	591315	1010030	671555	773452	1318280	747378	1470620	896275	1270370	1238080	690708
cg1837	Predicted	Predicted		11569000	3207910	7169120	9137980	4007780	7025470	10738300	3856530	4705050	8551910	4708470	5250870
cg1839	Uncharacterized	Uncharacterized		146553	237184	334907	230557	105932	138842	174492		120412	164765	136056	141434
cg1840	conserved	conserved		7524280	15168200	13850400	12659600	12088400	11319300	12520100	12938900	11681200	7094590	8303440	11711400
cg1842	putative	putative		115095	29551.5	100233	111320	84888.9	118342	118433	497211	132428	71518.2	65450.2	17779.7
cg1843	Superfamily	Superfamily		85004.5			32067.7						49215.7		34764.7
cg1844	membrane	membrane		622728	253675	478744	650262	674576	658448	564066	581866	376824	507572	537663	389445
cg1845	conserved	conserved		9252300	7376940	5624990	4181000	9724830	5263890	13871000	3115290	7948140	6983510	9996330	14700600
cg1847	conserved	conserved		711362	2195930	2215260	1363240	448122	677349	859944	362007	585817	1521330	526697	1813820
cg1848	Coenzyme	Coenzyme		1165140	917826	3101480	2660810	1140370	2030620	3311490		1143660	1592690	788112	477855
cg1856	Zn-dependent	Zn-dependent		349013	484254	319987	143620	736962	212275	446579	669910	368964	315431	706272	663740
cg1859	putative	putative		44144900	23350000	20269200	45073100	40505800	89390400	26745200	130214000	49891800	5252540	7815940	7261860
cg1864	ABC-type	ABC-type		3263420	2059780	2600230	1684170	2194710	2143860	1035560	1903670	1692070	1954510	3752870	1804220
cg1872	conserved	conserved		61997600	43566600	41094700	77593200	60693000	60656800	54936500	60614100	48352100	41250300	57977000	30295200
cg1875	putative	putative		2205290	1869620	1290730	1574930	1661260	2249830	1495580		1572300	1667790	1254600	1599160
cg1876	GLYCOSYL	GLYCOSYL			7869.94	13377.9					45829.5	48819.2	30043.6		49990.7
cg1879	HIT	HIT		1147160	797759	1018470	919000	975659	1896980	1082720	1817240	1626110	841665	951150	1054630
cg1881	Predicted	Predicted		1055890	854644	382422	662079	1017740	1330790	1318880	2004340	719205	499704	1214880	1066450
cg1883	putative	putative		294816000	194195000	215414000	126571000	97568500	242200000	507507000	71853700	265430000	230708000	76678600	172265000
cg1966	hypothetical	hypothetical		1043630
cg2007	putative	putative				19740.1	16039		11600.5	21421.3			20176.6
cg2078	PEPTIDE	PEPTIDE		4321750	2827790	1752740	4244190	4279680	3793460	1377510	4988830	3958150	1486610	2216860	993836
cg2079	conserved	conserved		6103470	6614740	9804640	8528850	4476560	6065700	4504350	6902840	4678670	4042600	4331220	3843530
cg2080	conserved	conserved		5533400	5552400	11999200	11428500	12141400	6791730	9395570	8540880	6881350	3167840	6400940	6584820
cg2084	PUTATIVE	PUTATIVE		328500	394411	858433	819766	285614	1906550	1458080	1529110	905398	589061	793200	265657
cg2085	conserved	conserved		30294900	19335300	18405400	26046600	28896300	29324600	30464800	23217300	25906800	14941100	21585200	16448700
cg2087	putative	putative		2182690	2303970	812966	3941870	1449210	1420300	5316150	2243820	806395	376698	692038	1986750
cg2089	conserved	conserved		25673100	9191460	7634420	16970500	22483500	26788100	15594900	40555200	23136900	6046010	15427300	16814200
cg2095	putative	putative			141234					228429					363469
cg2097	DNA	DNA		3095200	2798370	3229190	2658170	3155430	2672430	3017010	2840470	2144650	4191740	4175000	3519560
cg2098	conserved	conserved		10575800	4527750	4669020	9501860	13186600	13743900	4659920	15088800	7640090	4817780	4233510	3692250
cg2099	putative	putative		267628	74951.2		161922	287561	250862	110270	412662	143601			52103
cg2101	putative	putative		507349	559638		399534	560261	392972	225068			367517	862766	419507
cg2106	CONSERVED	CONSERVED		2326360	1800570	2774520	3185690	2734340	4092720	3388370	5476160	3470480	4644310	4537500	4551970
cg2107	Superfamily	Superfamily		604477	846018	2355830	2899940	731942	1984170	835333	487380	1617140	1727570	1762860	978485
cg2112	putative	putative			451983	1062360	437500	552846	741987	346347		502812	203826	457424	334931
cg2115	transcriptional	transcriptional		2228970	2541730	3635170	3094850	2835660	1689650	2451080	2239370	3276120	1490090	2611240	1757850
cg2116	PUTATIVE	PUTATIVE			6523.38	987440	5478.45	1206860		190687			1677040	1268330
cg2118	transcriptional	transcriptional		1037440	1142040				1909680		1640670	1393230			1093490
cg2124	hypothetical	hypothetical		7186460	14830500	11382600	13056200	13627000	10201800	16302000	19715600	14936600	9884260	14268400	10483800
cg2126	GTPase	GTPase		1282400	917295	883553	890147	1405860	1303010	954545	2575950	1461060	823411	1917870	1837220
cg2127	conserved	conserved		1714370	986006	2262480	2366820	2175440	2200580	1567870	2964680	1442010	1916110	4676020	3349490
cg2128	putative	putative		306341	298839	207747	507877		299996						384715
cg2131	conserved	conserved		6412250	2313640	2186290	2519300	3469930	3057590	2728440	3114020	4598150	2006760	7083630	2370700
cg2132	conserved	conserved		65800900	71130100	65161800	78499200	66027800	60285000	78794800	52349500	69079200	66395400	69654200	81549700
cg2133	Acetyltransferase,	Acetyltransferase,		111956	224234	97789	180790	148816	141866	118279	318972	138377	0	0	0
cg2134	putative	putative		4347110	4759770	4356150	9078390	5124800	3727110	14269800	5257100	3273930	4507830	4121730	5664550
cg2145	conserved	conserved		1645000	398744	633079	1444810	1974940	2047380	1009850	2762360	1673090	589937	1051640	910295
cg2147	membrane	membrane		816793	5211040	9995020	763171	3469670	1514920	16312300	2548180	1724830		11217700	6507820
cg2148	ABC	ABC		50665.1	15988.3		23493	29786		47495.7		39205.7
cg2151	Similar	Similar		118166000	125736000	153130000	131300000	99488800	101291000	116883000	85648000	122917000	113574000	118497000	114139000
cg2152	Predicted	Predicted		377212	780027	593205	1839290	1050040	643101	2565520	3603630	962014	1167080	481690	522425
cg2153	similar	similar		11971.4									4335.2		10523.4
cg2155	conserved	conserved		83473900	34959600	41323600	100192000	76369600	84949000	38149300	25205300	69409100	28650100	19618600	12355700
cg2159	conserved	conserved		9200280	5427640	5200730	3726400	6687330	13155000	6965040	9109340	11015000	6196890	9459360	6463370
cg2160	HYDROLASE	HYDROLASE		15307000	17093200	16110900	14175600	13676100	13613900	28363500	17518400	13111300	18562200	17408500	22630600
cg2165	putative	putative		2626330	1251890	1102880	2147070	3823830	3032990	1917560	4461220	2601950	948784	1778800	1131030
cg2179	conserved	conserved		33752700	19097000	22844800	26540800	14738800	19857700	17238500	15326200	21535800	11714200	11780500	12530800
cg2181	ABC-type	ABC-type		18519400	19293800	15155200	19680700	16445000	9963790	17456600	11310200	9211180	8474860	11288700	9635180
cg2182	ABC-type	ABC-type		49354.1	46643.3	23904.5		48884.9			126601			30675.4	103903
cg2184	ATPase	ATPase		8533130	4766790	5589290	5177710	4005840	9089720	5477250	6831310	5765910	3392520	3759430	5097700
cg2186	conserved	conserved		7085410	5205210	7919070	3800840	7773520	10112700	7899570	2831720	8449810	10515700	12098400	8802330
cg2188	Mg-chelatase	Mg-chelatase		79459.8	49924.7	29488.6	23460.1		61636.6	38457.4		54369.8	60880.2	70014.4	40872
cg2190	conserved	conserved		1123150	657271	967511	1068780	1456840	1132930	1545370	2008310	1217910	1133260	1554110	1296220
cg2193	putative	putative		1431270	1303280	757912	1031740	1084140	1668180	1273490	728987	990592	852331	1298130	772111
cg2200	Response	Response		5523900	3951460	5454330	4455170	6281350	5562280	3425330	5605520	4290910	4116240	3708170	4300670
cg2201	signal	signal		758352	512041	317219	915771	368357	512805	800362	595355	560281	113225	269046	555346
cg2207	Predicted	Predicted			441197	1703890				694940			1494160	2275890	527538
cg2211	putative	putative		7379240	2525730	3574840	6903350	11195400	6691170	6547430	15289600	8480240	3454690	3252080	3440670
cg2213	ABC-type	ABC-type		369295	208855	237338		300667	308663	213777		242178		852995
cg2214	Predicted	Predicted		24828800	24652700	13298700	21454100	15408500	15582800	19761800	14743100	20675900	15931300	15861200	28372200
cg2215	putative	putative		385924	167222	384418	164091		192286	307214		250138	158208
cg2229	putative	putative		1184420	2161010	2577340	991077	1425520	2275110	1002040	3078020	2056340	1759990	1821590	1199350
cg2234	ABC-type	ABC-type		243070	215577	182236	751433	237111	179831	271392	321633	213576	314578	340515	275419
cg2241	PUTATIVE	PUTATIVE		205389		147876	300053		358642	251341	1173970		242327	326671	200338
cg2247	conserved	conserved		26976.1	5893.63		31194.1	11902.7	10009.3		20956.1
cg2250	PUTATIVE	PUTATIVE			1018310	3790890		1170380	2066770		2770070	1494720	998444	1069710
cg2252	double-stranded	double-stranded		10379600	1037120	1292450	0	0	0	0	0	0	0	0	0
cg2263	conserved	conserved		463544	548498	1239520	1581780	340826	715990	990887	1962270	669972	809314	1429290	2835160
cg2266	PUTATIVE	PUTATIVE		307644	260351	442706	367297		313042	433663	814128	578629	316441	507485	493301
cg2267	putative	putative		696760	876255	609419	826094	663046	742490	749431	734860	704255	370605	608732	726895
cg2274	Predicted	Predicted		38269600	28607700	11387800	64105200	37305900	50121600	22073100	22261200	36997000	17353300	18806500	16065400
cg2275	putative	putative		12080400	14290600	10417200	11683000	13364200	13250100	12197300	12730500	14298500	10490600	10406800	11115500
cg2283	conserved	conserved		5094780	2600450	3569260	3556010	3149030	5909970	3314010	3458960	3830270	2511550	2545040	2205770
cg2284	Galactose-1-phosphate	Galactose-1-phosphate		994494	530928	2299900	1178660	316879	1443860	0	0	0	850746	469062	970465
cg2290	Glyoxalase/Bleomycin	Glyoxalase/Bleomycin			320703	423570	298225	591945		226388			827697	934635
cg2294	putative	putative		328583	2335630	578175		1679140	630978	766822	514945	792125	1969430	2153650	389282
cg2308	putative	putative		79311500	72708000	74646300	68834500	138986000	91941000	108723000	107572000	108351000	94920600	93581500	98218800
cg2309	Bacterial	Bacterial			183414	123116	198070	120661		314490	342681	161163	410899	105903	309085
cg2311	SAM-dependent	SAM-dependent		3561680	8024300	4453880	2309640	5813230	7177380	3260240	10115000	6060290	3031550	4759910	3440920
cg2314	transcriptional	transcriptional		180528	249555		171659				376050	117221		182686	177670
cg2318	ABC-type	ABC-type		41947500	19926400	11659700	20620100	18688000	24316600	10454500	5349950	21875500	10278000	12202600	28978700
cg2321	DNA	DNA		684222	644218	903691	890057	790975	522892	995334	873375	614872	1131090	1257310	1299940
cg2324	conserved	conserved			340785	522458	365332		160135				186059		136682
cg2328	hypothetical	hypothetical			30858.3	11679.8	28603.1			25450.9					19141.8
cg2329	Coenzyme	Coenzyme			75518.5	57896.1		55037.5	65456.7	76795		76811.1	52202.3	49963.7	58820.7
cg2331	putative	putative		1770930	947758	1224670	1189180	1418040	2376620	1488260	1293030		1295820	1732730	2228760
cg2337	similar	similar		4011340	3289150	1603960	1770230	2142960	3345560	1085550	3780020	2139470	973122	3651570	1354650
cg2340	ABC-type	ABC-type		1527330	804922	986722	4140760	1757570	1118690	715143	1895960	1315000	939984	1152810	1212590
cg2342	Dehydrogenase	Dehydrogenase		10552800	7478740	10662500	10572700	11661600	8368530	5868470	11025900	5320670	5221880	10238200	3961820
cg2343	decarboxylase	decarboxylase		0	0	0	0	0	0	0	0	0	39397.7	60932.9	49271.9
cg2345	putative	putative		664295	442242	296987	630264	233593	915811	197204	168269	511070	213844	208579	137357
cg2348	putative	putative		4307170	3866890	2616640	6073420	4051530	4690540	5344110	6531620	4145470	3763540	4290020	3140960
cg2350	conserved	conserved		24327500	25057300	23995700	29133600	22736100	32322200	40528000	24918400	32110000	28936600	18731300	45964100
cg2361	Cell	Cell		411945000	309084000	364762000	475652000	364240000	328060000	445309000	299098000	441591000	285679000	319951000	298987000
cg2362	putative	putative		72694.1	57865.4	111328		55757.6	32179.7	104522		46884.5	155103	102407	149396
cg2363	conserved	conserved		290787	132886	290562	172001	189645	266915	251724	522081	253435	476579	413855	283558
cg2365	conserved	conserved		3178090	2208200	3367600	5436620	1570890	3160570	2313190	5540620	2977360	1108970	3709940	4271880
cg2382	GCN5-related	GCN5-related		929808	1537630	901314	2633300	823169	1171920		1375830	1081460	467135	695136	3469120
cg2386	conserved	conserved		26834900	25780800	28114900	44565900	24904200	21400300	31101900	18341700	24018900	18592600	20738300	22351700
cg2393	putative	putative			131128	57501	52465.8	128718	70199	67741.5			56339.9	205679	53332
cg2400	PUTATIVE	PUTATIVE		823019	586022	1989470	807646	1728460	855539	512014	1163130	1006690	535293	1666800	543931
cg2401	SECRETED	SECRETED		4874240	2546940	3785380	6565060	3513630	6274930	1730430	12553700	8499880	4633330	5912090	2039720
cg2411	Hypothetical	Hypothetical		315080000	68601800	115825000	237209000	412957000	348013000	196691000	428370000	289930000	122583000	203500000	146810000
cg2412	putative	putative		6331730	4755190	16961600	9067540	22486700	8834740	17893100	13793800	9676970	12854000	13808500	5745850
cg2417	SHORT	SHORT		29671700	32008200	39209500	25839700	30013300	23004600	25343000	14275700	28707100	18206100	23068700	18286200
cg2420	conserved	conserved		2692610	4237450	1200000	1798420	1089390	1991470	957582	684745	1664680	1619490	1440770	1657010
cg2424	putative	putative		13303000	19715600	14483600	14393000	16031200	14546600	21441900	10899100	13900900	20974300	18019600	15397600
cg2425	Predicted	Predicted					68288.7					8102.19
cg2428	putative	putative		2864850	967473	361722	3515800		2238390	1683190	1043180	1268340	560639	453149	2821130
cg2431	PUTATIVE	PUTATIVE		13046200	10464500	13154600	23282400	22429100	23478600	5774170	26561600	12627600	8689480	8841650	6504910
cg2432	MUTT/NUDIX	MUTT/NUDIX		7741870	3208450	4640030	5403200	4799960	5221820	3931740	5989900	6130420	4886050	5857520	2806810
cg2444	hypothetical	hypothetical		42762400	44915300	34954800	97537600	25574900	49673800	14039400	39322500	20921100	11828200	17964400	17592600
cg2450	putative	putative		5506620	5933030	7055760	4913290	2950100	5099930	3813410	6570880	3794830	3635970	4122880	4887110
cg2451	conserved	conserved		132086000	59569200	46744100	107016000	139746000	127185000	52539800	231258000	128567000	33072700	61963400	28063700
cg2452	galactokinase	galactokinase		0	0	0	0	0	0	0	0	0	39658.1	159717	91289.1
cg2453	PUTATIVE	PUTATIVE		814896	738218	1333070	846629	490959	673481	974293	1804810	517389	1212790	948209	562267
cg2455	Ribonuclease	Ribonuclease		2261380	1191520	1701310	1706100	1018040	2316780	1487380	1414400	2003180	892588	1581010	1382460
cg2456	Zn-ribbon	Zn-ribbon		158181000	126157000	127235000	143143000	171194000	146791000	274358000	140520000	195709000	102697000	114896000	119307000
cg2457	conserved	conserved		1648430	846613	992671	847669	791801	1048560	852519	1495690	1279440	603126	1650930	586462
cg2460	putative	putative		3944610	136323	200314	699194	2706280	125663	345044	234376	115062	104340	165128	640533
cg2464	conserved	conserved		21842200	11962900	27152500	26537300	17910700	47243600	10148800	53352500	20431700	9847980	15717200	10013700
cg2467	ABC	ABC		3570570	5976770	4484790	3056420	2861490	4742030	4935310	3078700	3759970	4426720	2565700	2810790
cg2470	SECRETED	SECRETED		1075000	469910	1206760	304054	1145310	2435750	494112	1394860	1305980	562308	678109	359334
cg2471	weakly	weakly		394727	164710	342764	0	0	0	0	0	0	0	0	0
cg2475	ATPase	ATPase		9805760	4981020	9763140	9469960	3866970	9170620	3015090	2848260	5928550	6572950	5342100	4553380
cg2477	conserved	conserved		93008.3	17997.9	30025.8	41848.4	42635.6		107188	99221.5	109723	173742	209758	96308.4
cg2478	putative	putative		428736	399409	981236		243334	748347	427508	1220280	891273	628510	738705	330803
cg2479	hypothetical	hypothetical					53663.3	31735.8			65899	45425.6	10514.5
cg2484	hypothetical	hypothetical		105651	96552.9	143746	309755	260251	367894	196178	260522	278841	54374	201615	228648
cg2487	conserved	conserved		511102	537937	428533	334146	365428	438337	623811	827169	359660	439878	642260	721724
cg2488	conserved	conserved		9960540	5893440	12196300	8174610	8123920	7968310	13542100	13146300	11981600	7762790	8013490	7470740
cg2490	secreted	secreted		1671680	428988	944545	1068220	3675990	3806590		2584180	1438920	1185230	1915900
cg2491	conserved	conserved				27942.1	73588.2	52280.8	43059.7		60709.2	18409	12591.3	31355.2	12276.9
cg2495	conserved	conserved		1075050				2069850	941044	838913		821091	491005	2249590	450081
cg2496	putative	putative		8431160	11239800	7510440	10760100	8943650	11381300	5740340	8200810	6534550	4380080	5500860	7738110
cg2497	hypothetical	hypothetical		206861	322482	196955	1135140	425886	340120	220411	639110	766532	235049	1721990	376942
cg2498	conserved	conserved		1864250	3302130	2097580	3252020	2182560	2088500	1669180	1747540	1469130	2088090	2164130	2751910
cg2500	Bacterial	Bacterial		4091350	3553910	3815420	3148360	4050620	2439910	5255970	2854080	3184860	4856840	2828220	3503340
cg2511	putative	putative		6073.2	22666.4	13190	12603.2		9488.85	15545.6		9297.24	9615.4	8215.29	9631.6
cg2514	conserved	conserved					949123
cg2520	hypothetical	hypothetical		3143870	1301380	4508770	6784570	10886200	4028540	2833170	4172310	2749070	1064260	2031590	1975300
cg2524	putative	putative			135904		921928					268289	255721	183384	165509
cg2535	putative	putative		5681470	4621650	4725310	5243020	5223190	13463500	2672010	3174170	6913780	3143890	3075690	4984970
cg2538	ALKANAL	ALKANAL		930256	1047020	1402840	2746310	1227690	1216870	2004270	1555010	1409090	1253090	1380350	1662660
cg2544	Bacterial	Bacterial		532026	582485	859457	730070	542665	765073	601566	764581	637841	555421	588945	544397
cg2549	ABC-type	ABC-type		270522	126334	175314	155765	166495	509796	135965	174805	516220	116212	125988	145800
cg2551	ABC-type	ABC-type								1750360
cg2556	Uncharacterized	Uncharacterized			1433580	2605470	2832910	4193990		5784210	2108260		2208760	8572670	3813880
cg2558	related	related		31001300	29148200	43690500	47617400	24182100	34367400	19685800	26280700	20695000	18157400	26129600	17853600
cg2562	Serine/threonine	Serine/threonine		3894560	3814760	4192240	5680010	2350240	5042470	5201900	5400860	5189830	3430720	3630110	5645680
cg2565	hypothetical	hypothetical		82722.8	101165	115118	140900	158547	133128	76549.3	127359	119608	77334.5	99770.9	65983.4
cg2572	conserved	conserved		556430	1568790	884446	640135	489805	612871	742233	584186	573713	364436	368962	417075
cg2575	Ankyrin	Ankyrin		9609860	3287400	6787400	10685200	10621800	15555200	5259410	18101600	8599570	4804850	6322870	4081350
cg2576	putative	putative		1216570	289861	1625320	512682	639802	860434	996632		758183	582343	443611	678819
cg2579	protein	protein		510790		576192	224608	152209					492554	655588	159009
cg2581	putative	putative		407544	188376	572146	345208	401278	506100	297445	1233850		376597	760755	259025
cg2582	conserved	conserved			259523	305128			881044	439257	547827		602504	409525	309038
cg2585	putative	putative		3549080	1915930	16113000	5722520	18004000	4775610	7852200	21918300	6238810	6369590	15512900	10088000
cg2587	Phosphoglycerate	Phosphoglycerate		6377450	5520510	10119400	10541200	8631190	6350570	6543870	7741810	6873650	4441560	8650680	5746200
cg2589	Predicted	Predicted		7137020	9036010	7804470	7452420	5388380	7151120	7543670	7232050	6691350	7110830	6685950	7525200
cg2592	hypothetical	hypothetical		165922	330423	995300	523119	100149	496807	787031		501662	761150		170841
cg2602	conserved	conserved		947677	591961	523606	1486040	471964	524473	288987	740003	741430	257133	1060710	502963
cg2604	putative	putative		994661	902388	842454	1690630	1112120	1188080	841482	1030780	1190620	532662	534273	376527
cg2605	Predicted	Predicted		6399660	3491710	6653090	9099510	5946070	9535100	3314680	10259200	3665640	1866430	2910800	3702450
cg2606	conserved	conserved						54304.2		47753.5					61386.7
cg2607	putative	putative			6915.43		5744.6								4458.29
cg2610	ABC-type	ABC-type		11140800	14000700	19670900	5769900	8772700	15290900	9921270	8054510	9320640	12429700	9806130	6613900
cg2612	Predicted	Predicted		2165270	4215950	3149830	2837950	3010890	3555310	2485870	6373510	2918360	2642070	6349280	3125860
cg2615	Putative	Putative		1411900	522533	714917	800774	1480320	684114	738829	633307	1245450	865335	1825310	472240
cg2641	Bacterial	Bacterial			1253110	407569			1830960					1199010	467552
cg2648	Bacterial	Bacterial		1388750	1329790	1373980	1861180	2235690	812719	990529	1348830	1340260	1216730	1325490	1198350
cg2651	conserved	conserved		163284000	67227100	131625000	189495000	284525000	327296000	140037000	481491000	185238000	156823000	453209000	216814000
cg2657	putative	putative		1687800	1437210	2604060	1057060	1587410	3416020	2119040	2969370	1808070	2591850	3644500	1245900
cg2661	putative	putative		70182900	50791100	45235800	53716800	53148300	43736800	46359200	43336800	49124700	27112000	35897400	53928800
cg2674	Alkylhydroperoxidase	Alkylhydroperoxidase		3293260	4044530	4929040	7574140	3134660	3205960	6107120	9516640	4238630	4970020	6718060	5444020
cg2675	ATPase	ATPase		2874740	1873210	2346760	2213240	2733860	2633700	2296460	2489260	2382970	3691020	4305350	3404230
cg2676	ABC-type	ABC-type		570645	247480	516948	516584	765073	136867	614863	559274	602164	752908	1081000	774393
cg2677	ABC-type	ABC-type				112342	110466	190712		143152		232582	377681	338798	279866
cg2678	ABC-type	ABC-type		10009300	8801510	6280900	7039800	5597830	7399700	7594130	12190500	8899390	11054300	12776100	14790000
cg2679	hypothetical	hypothetical		2536520	1402480	3797330	1839020	1946220	3616200	1626320	3081190	3374960	3126810	6991920	4398330
cg2680	Aminotransferase	Aminotransferase		781080	1187660	229366	0	0	0	0	0	0	293250	1507090	311102
cg2684	membrane	membrane		146137	29868.6	90335	79284.5	143609	158200	61903.4	342672	129287	68171.7	94955.7	31023.8
cg2685	PUTATIVE	PUTATIVE		5921940	5205010	4380920	5197300	4592790	6396390	6527200	9265970	5758550	3013560	3779030	2918370
cg2686	Bacterial	Bacterial		3330710	2681960	4806270	3542430	2761380	4658440	2962870	2187120	3385240	2388290	1552500	2518780
cg2691	conserved	conserved		2385810	1792250	761186	809366	2228180	2087540	1114260	1767090	1360480	1282760	3628780	1386280
cg2692	Predicted	Predicted		35575200	60073100	18321900	25209800	36202700	29836200	55934300	33184700	32459400	23986700	39206600	48613000
cg2695	ABC-type	ABC-type		15807300	25441400	24641700	23379600	11655800	20005900	33192500	41219800	19294100	17747600	27621900	34553400
cg2699	putative	putative			159712					277216		196206		359980	203693
cg2704	ABC-type	ABC-type			350556	354450	271143		363163	391503	453593	355818	573803	561999	437367
cg2707	conserved	conserved		1585280	3079220	1741220	2197400	1100130	2508620	1030560	2132720	1698330	930039	1762690	1979180
cg2709	Putative	Putative		114136	57745.2	96076	90008.1		98118.9		169605				56857.6
cg2719	PUTATIVE	PUTATIVE				7703.18			26485.6		57636.2	26637.3	10175.4	23038.9
cg2735	putative	putative		146836000	137406000	188598000	279180000	194491000	196651000	196436000	208569000	138194000	283476000	283841000	228293000
cg2747	SECRETED	SECRETED		6153900	4222310	2645280	26759400	6613680	12094000		15695000	7220210		3508960
cg2748	putative	putative		393274	506208	2414170	1607790	526847	897081	1686750		663523	454266	319933	473860
cg2750	putative	putative			4432940	6214700	2404540		5685140	10878800		5106700		3109500	2207900
cg2751	Xanthosine	Xanthosine		1052190	916030	1618720	2523380	1603740	1255840	1265770	1160260	1013020	2233420	1849950	1311150
cg2758	putative	putative				31585.8	142473		27387.9					34145.2
cg2761	Metal-dependent	Metal-dependent		3554390	3194990	6954200	6034000	4990150	4827530	7808570	5639410	5335120	6013290	7635770	9045450
cg2765	putative	putative			8868.16								6223.84	4373.77
cg2766	Bacterial	Bacterial			53584.6	23353	73512		17875.6	54069.1		39487.2		59189	72964.1
cg2770	conserved	conserved		9175210	14205200	13044600	27099300	14697500	13154300	11200100	21300600	14525500	5688160	9808080	5917560
cg2773	Uncharacterized	Uncharacterized		10831500	3394920	5660210	7503220	9167300	18613600	6776830	35731400	10515500	6685940	7758170	3748330
cg2774	Nicotinic	Nicotinic		13609300	11294400	5397740	6112700	5647780	6330390	4579850	6233810	5164080	4903250	7554830	7674370
cg2778	conserved	conserved		393353	463288	327925	689241	443608	492333	329990	330326	276788	206420	393519	538634
cg2783	Bacterial	Bacterial		6230810	4782920	3674450	3897250	4064810	6827880	3858310	3495050	6844010	2825530	3788550	3210620
cg2791	Ribosomal	Ribosomal		149986000	74853600	165549000	430799000	203058000	181302000	187373000	590417000	65510900	136997000	125114000	128070000
cg2794	conserved	conserved		9289470	9412820	26656600	8854990	6925590	15796500	11976600	12112200	9325140	10412000	9742040	9997380
cg2795	NADPH	NADPH		3197310	7672020	5627770	7867530	3757310	2797750	3447270	4090170	3063290	4537970	3938900	4179060
cg2796	MMGE/PRPD	MMGE/PRPD		634981	2570070	1225430	796528	963900	3011760	1058980	1512870	1375390	1378990	1582480	815941
cg2797	conserved	conserved		348899	996878	536314	183679	341255	827643	323746	669243	233454	263981	459218	243342
cg2803	conserved	conserved		431981	2999280	839485		3225450	737877	1570000	4860480	2814090	464107	1623800	1489460
cg2810	Na+/H+-dicarboxylate	Na+/H+-dicarboxylate		0	0	0	0	0	0	0	0	0	514241	399062	800029
cg2811	ABC-type	ABC-type			91145.3								125488	139784
cg2812	ABC-type	ABC-type		9618130	6383960	14490400	12007900	6737370	13352200	6484850	7003910	11340600	11619800	12009700	6816560
cg2831	Bacterial	Bacterial		1650470	3333800	1838200	1411830	2019570	1732900	1522840	2975310	1746900	2179090	2195090	1731190
cg2835	Predicted	Predicted		117707000	59203000	148586000	219379000	155096000	180332000	65515400	261717000	73024300	31656900	65921500	52634100
cg2838	Predicted	Predicted		2088380	1809220	2741090	5732090	3259540	4505210	3969170	3595820	3737580	5574270	5808110	2695670
cg2841	Predicted	Predicted		2488120	2169720	1905450	2324580	1706830	2713940	2246260	2701480	2001290	2637850	3262400	2073630
cg2847	GCN5-related	GCN5-related		36232800	55998600	23959900	20102600	35576900	15532900	43603100	17231400	12494500	10543700	16353200	44507300
cg2848	putative	putative		231130	33325.3	198763	157171	94770.5	58848.1	72621.1		123403	143582	203415	61670.6
cg2849	Predicted	Predicted		654474	690462	182217	700754	239249	285631	367478		282800	246739	245728	836095
cg2850	conserved	conserved		13713100	16841900	20075200	18528400	11694300	12028400	9264600	28878800	12041900	12325700	19757600	9126160
cg2851	Branched-chain	Branched-chain		481107	434956	977734	713634	1223850	783377	0	0	0	1098310	1622350	479006
cg2852	PUTATIVE	PUTATIVE		16558600	11207800	12415600	13179400	14508600	13907300	12427200	14465700	11962100	14088400	17442900	10333100
cg2853	conserved	conserved		29829900	14742300	25138300	58712500	73680000	52372900	31427300	54213700	46677600	19166800	33197300	20484200
cg2859	conserved	conserved		1625930	547651	949132	1102270	742556	1428970	497277	2356130	731445	538072	1857840	1837980
cg2860	PUTATIVE	PUTATIVE		24500800	22339300	13776600	20501100	12795800	30009000	16110500	31141300	22489800	18216200	30051200	16884800
cg2869	Predicted	Predicted					46454.5							22182.3
cg2877	AMINOTRANSFERASE	AMINOTRANSFERASE				738383	1350130	1574360	1150560				1679350	2301520
cg2880	HIT	HIT		1449770	1335820	2518820	2396420	1244590	2968870	1650820	1948410	1945950	1391110	2333470	3154220
cg2883	SAM-dependent	SAM-dependent			150144	219994	246675		264843		252749		151525		195842
cg2889	Bacterial	Bacterial			41087.9	111091	57149.7	88781.3		41314.9			32408.7	72958.5	38925.9
cg2890	PUTATIVE	PUTATIVE		778628	215928	367579	179732	398935	569493	440359	501903	186842	413475	421184	631204
cg2894	Bacterial	Bacterial			134825	94836.7	147398	260102		110257	100124	145797	165657	129129	109524
cg2896	putative	putative		23529800	7495570	7125030	17519500	27317600	14926600	7097200	30962000	14947100	5805930	8156520	7027740
cg2901	Putative	Putative		197228	167774	162075	369784	221191	271646	251582	370276	148712	171984	192657	232942
cg2902	Predicted	Predicted		38202700	18921000	30214000	38930800	26777100	19360500	20693600	30198600	23647700	27351900	20969600	25417700
cg2903	hypothetical	hypothetical		1296750	3272880	3978510	3635840	1970080	3646840	1159900	2932520	1065370		566883	467322
cg2904	hypothetical	hypothetical			69292.2	225678		66822.7	187477	87534.6	87448.7	201666	147991	267786	101726
cg2906	conserved	conserved		555461	416157	233183	679446	326905	239250	517752	1461360	426910	143950	805160	257731
cg2910	Transcriptional	Transcriptional		1494770	2469360	2558540	1383540	2046330	1882690	2608810	3097710	2376210	2108560	2380940	1444070
cg2911	ABC-type	ABC-type		15400000	15861900	4807830	40535100	15629000	24490800	24606500	32844900	16027100	7442450	11939700	12038300
cg2912	ABC-type	ABC-type		1720420	2170940	2283630	1635620	2241630	1641410	3558890	1882830	1622360	1090370	2426780	2916950
cg2923	PUTATIVE	PUTATIVE		5687340	4365590	7203180	7058910	6245530	7863720	5887900	16765200	8914700	5522070	6632600	4020620
cg2932	Transcriptional	Transcriptional			70742.2	6560.19	17744.9			44414.3	20670.5				176288
cg2936	Bacterial	Bacterial		1135910	1852200	4891530	400508	1429370	2818300	1428280	3012120	2300840	2192280	2190920	1241390
cg2937	ABC-type	ABC-type		2446220	3535020	2966550	4789870	2410710	3050660	3148290	5749510	3085670	2637550	3039260	2297370
cg2939	ABC-type	ABC-type			10802.5	28516.1	12265.9	18764.2	18191.8	14892.8	76528.9	24210.7	6373.87	22503.7	12162.2
cg2940	ATPase	ATPase				192792	136680	148723	138014	140610	475448		67661	148819
cg2946	CarD-like	CarD-like		14827700	15387400	6944990	7978170	13082600	20782900	18252000	11060400	13953100	10512300	12333800	14895200
cg2949	putative	putative		12783100	8406800	9279990	3610620	14611200	6192920	9976440	3177230	8729860	11540100	13175400	9492080
cg2951	Predicted	Predicted		1059030	1859320	1253260	1826080	1147310	1006680	1502920	1552900	1616470	1437740	1819720	1007950
cg2952	putative	putative		2022920	2866780	941208	2064790	1502450	3164420	825158	1554200	1391820	309839	513341	194346
cg2956	putative	putative			176327	7550
cg2957	conserved	conserved		17337800	6574940	19269700	21573200	10657300	31257800	19988900	33682000	13168100	15153600	5879940	6793430
cg2962	Uncharacterized	Uncharacterized		246221000	21125200	12280600	55918200	208032000	22883600	74250300	30515000	20461400	3267200	12485100	90409800
cg2968	conserved	conserved		246483	136690	126487	256093	161313					152913	246271	11049.8
cg2969	similar	similar			226279	147704	167142	301704	87258.4	195479	448503		229471	374255
cg2970	conserved	conserved			31893.8	82149.2				63955.6					49987.3
cg2976	conserved	conserved		1872190	1686850	1415720	1287760	1468970	2665880	829204		3537880	590148	2553130	3885740
cg2977	putative	putative		8149410	16053800	2676670	2080110	15140300	11714200	20200500	2026940	11721100	12834400	13927700	10158200
cg2992	putative	putative		47064.8	32731.2	139932	54704.9		65786.9	102283	115124	63892.9	159705	85267.9	12926.7
cg2993	conserved	conserved		663800	313670	555897	3398130	860808	1135360	464138	884229	517623	333723	327507	375440
cg2994	putative	putative		15551800	31726500	31132900	32128000	21267800	18729900	47209700	26991300	18836500	29154800	17019600	18766500
cg2999	PUTATIVE	PUTATIVE		3055290	3923260	3840940	2519830	2378590	2539360	3754410	6465780	2439420	2613180	3275890	2611810
cg3000	Rhodanese-related	Rhodanese-related		332146000	130255000	88227900	232211000	339122000	220447000	149321000	250376000	210539000	45613200	126632000	195294000
cg3001	hypothetical	hypothetical		5897820	6744260	6886810	1102860	5084480	3874340	3803500	6505780	6143520	4992730	4424800	3062820
cg3012	putative	putative		830820	329963	786020	307327	378084	1317810	734113		1416900	573130	476918	199179
cg3013	hypothetical	hypothetical		197011	383856	156705	262012	191804	184379	174648	297594		187023	249668	290143
cg3014	hypothetical	hypothetical		1127890	1114860	1147670	1231030	1032420	1203360	1461510	1571520	1355800	1347220	1521280	1169830
cg3015	hypothetical	hypothetical		727911	259308	118149	274186		437502	611641		439406	79442.2	117109	722727
cg3016	hypothetical	hypothetical		1256430	1133980	1658460	1202510	1064480	1787890	1553670	2076340	1335160	1558350	1447900	1223280
cg3017	putative	putative		606079	1012650	1217210	1303030	1848480	1650810	929869	1368110	1925340	1805130	1972690	1932560
cg3018	hypothetical	hypothetical		3252740	4053300	3946380	4049170	4644990	4496170	3235800	5443280	4495810	4174430	4948040	3629730
cg3019	putative	putative		2194630	2194360	1308610	1722610	1892350	2618660	1540830	3323080	1937870	1993970	2714390	1417840
cg3021	Peptidase	Peptidase		3981590	3665420	4648160	4451950	2708630	4193450	2866700	6301440	3697410	3003560	4766840	2809590
cg3030	Predicted	Predicted		2599990	1886550	4511690	4230350	2005070	3122360	3123660	4330600	2707570	1580410	1814340	2709460
cg3031	conserved	conserved		1106210	1206950	428731	720506	777796	1462190	2454030	4147370	933375	539747	857516	4113050
cg3032	putative	putative		636960	632657	613526	936850	675136	1113060	999420	827343	814435	793362	798683	588447
cg3033	conserved	conserved				2550600	2350910	7921630	1588530		3182850
cg3035	acetyltransferase	acetyltransferase		1255300	2078230	1516270	1607470	924312	1461700	817601	1059330	805638	1129280	1188720	719846
cg3040	Predicted	Predicted		271447	619425	1243680	422012		1255820	532234	3270810	524533	604623	357605	538898
cg3042	ABC-type	ABC-type		1816950	1882050	2519260	2929400	2245610	2731860	1767420	4754980	1969370	1482030	2361720	2014850
cg3043	NTP	NTP		1481510	1028490	2471470	1751970	1390740	1461150	1128210	3146620	3986370	619115	685525	906616
cg3044	putative	putative		742232	84522.2	411729	481108	523272		274205			833239	609662	264589
cg3045	ABC-type	ABC-type		415790	955716	580818	762576	550418	601083	377012	911872	470399	460901	486876	387281
cg3050	acyltransferase	acyltransferase		21953200	31974000	32724200	42290200	38956500	45098100	25994600	55278400	38751600	26151500	68488500	31483300
cg3051	putative	putative		1118900	171432	183867	362650		517327	376907		388501			162535
cg3057	putative	putative		11921800	3766600	2084040	4458820	12937100	6949870	2886240	7129360	7050950	2698270	5961070	6188140
cg3065	conserved	conserved		236939	303422	705044	488531	302704	662167	666628	500641	352362	433164	505055	379673
cg3067	putative	putative		266993	1206850	367445	996878	891357	1411860	224835	1389000	666507	1356660	1503570	1499760
cg3069	conserved	conserved		484069	497164	1129400	927625	411726	586155	707582	1408280	275561	563918	902280	889246
cg3072	putative	putative		19897700	9966840	14357200	14049600	13274400	15108200	20210800	9582770	14341500	13834700	11594000	10266200
cg3074	Predicted	Predicted			59654.9		100370		87719.9		58998.2		80270.4	35443.4	62740.6
cg3078	hypothetical	hypothetical			52215.7		409614	362370	193058	266466	111028			555539	562463
cg3084	Predicted	Predicted				29171.9				25580.2					14561.3
cg3085	ALKANAL	ALKANAL		339263	610990	483059	567289	1018050	603355	605217	958676	518002	769149	700531	582216
cg3090	conserved	conserved		523816	660395	446424	360534	396571	341924	611621		426814	615371	342537	298057
cg3092	2-polyprenylphenol	2-polyprenylphenol		1128300	1894390	2160760	3717440	3691400	1945610	1435420	2269500	2644230	364053	3309480	1103540
cg3093	Carbon-nitrogen	Carbon-nitrogen		1178690	403683	1022330	875779	431510	1601470	641718	408970	1001030	794785	1032380	428461
cg3096	ALDEHYDE	ALDEHYDE		18439200	20565600	20163900	19606000	14863100	16114300	20353300	22902100	13662800	12272000	20066500	13366800
cg3101	Predicted	Predicted		354633	338233	708515	375294	2235940	739285	540970	738949	673591	358787	503091	476476
cg3102	secreted	secreted				13937.8	4578.5						12748.5	20126.6
cg3104	ATPase	ATPase		325282	222463	381338	406659	298278		356002			299288	699957	402154
cg3105	hypothetical	hypothetical			11554.1	7289.1	18029.2	13480		4962.07				9876.14
cg3106	conserved	conserved			89017.9	134159	277432	99949.5	162155	199891		275569	142675
cg3113	conserved	conserved						405235			548944	289216	643163	1846040	775222
cg3117	conserved	conserved		5471.78	3663.78	6902.29		6328.45	12363.7				8219.05	18826.4	5378.92
cg3120	conserved	conserved		306552	481068	393905	612056	150730	470021	308483	298811	397282	229571	262007	406966
cg3127	putative	putative		517205	384516	875873	412851	755173	999309	457616	852418	577062	376514	466177	205002
cg3131	Acetylornithine	Acetylornithine		543169	453115	188004	317806	473299	325666	482184	552887	265984	352731	777801	1107300
cg3132	putative	putative		1857030	6950560	804923	5653250	7090430	2257610	2326500	27646100	4011300	4019290	10282900	1343270
cg3133	ABC-type	ABC-type			5249.37	3260.1			6558.58		13782.6		5612.06	5983.95
cg3134	ABC-type	ABC-type													197194
cg3135	putative	putative		6951670	8002780	2338590	4420080	17475600	14491800	4384790	22313200	6430270	13959700	28169800	5516810
cg3138	Membrane	Membrane		1376190	2001980	2505470	3219710	2136590	2260220	3532710	3119600	1756740	1491500	1697670	2411330
cg3139	conserved	conserved		289553	129359	175283	360198	338601	269351				180100	322597	279849
cg3142	putative	putative		4363840	2517880	2859510	2691740	5741220	3653590	4647050	13580800	3214210	2095540	3474320	2083850
cg3143	putative	putative		133711	96421.8	165839	171088		237282	206015	357457	221104	374686	620413	437953
cg3149	Aminotransferases	Aminotransferases		1845990	1878470	1598600	1599270	920996	1601760	2316600	2279350	1765530	788468	1387160	2030090
cg3153	putative	putative		306724	307723	274972	303969		415641	548202	351998	429480	340855	198479	421043
cg3157	putative	putative		35531500	29491300	22425400	44940800	40518800	36299900	35393000	49908600	40250900	41911800	38447800	48068000
cg3159	Universal	Universal		184389000	33477500	37871100	98659700	126699000	114337000	63222300	172053000	79672000	30256600	33356200	29454200
cg3160	putative	putative		283510	259119		252774	651543		372076	499956	479693	306544	342645	272440
cg3161	putative	putative			37733				11267.2				12759.1		67411.4
cg3164	putative	putative		22314.4	6278	20450.2	19544.3			14698.7	43320.5		18226.5	7610.58	6495.91
cg3166	glycosyltransferase	glycosyltransferase		0	0	0	0	0	0	0	0	0	914262	899592	337937
cg3167	hypothetical	hypothetical		3579720	1525760	1142490	1698880	1951720	1393630	1606690	1297230	1392980	1224840	2110400	1608320
cg3172	SAM-dependent	SAM-dependent		12203500	14101600	10516400	5267830	15309800	7742230	18123000	6672200	9153160	9668330	16621000	15182500
cg3173	conserved	conserved		140221	217254	154788	110612	190792	68138	92093.8	107605	97376.5	54686.6	76518.6	256944
cg3180	putative	putative			19603.6	21616.7	28345.2	20088.6	25012.1					27502.7	20971.3
cg3181	putative	putative		246183	108124	123464	50841.1	98931.1	114166	125785		128986	112077	121773	30032.9
cg3187	putative	putative		40657.5		34362.5	133765	32858.7	87769.6	38845.3	430607	59523.2	40751.2	53754.9	21070.3
cg3191	Predicted	Predicted		6729670	5815900	5500940	7372230	5361140	7527000	6447730	16277400	7503730	5075380	5442870	4829310
cg3192	putative	putative		8392460	10619000	11559900	10412400	8571120	7311760	10747500	6461910	9609050	8586160	6915200	6736860
cg3195	Flavin-containing	Flavin-containing		14439000	17475100	14920200	13918800	12116300	14276700	14793400	34899400	13720200	10356600	18123600	19020900
cg3199	Predicted	Predicted		1806650	690295	2355720	3189270	1371430	3111000	2009190	690994	2276360	1081610	1496300	1974490
cg3200	ACYLTRANSFERASE	ACYLTRANSFERASE		5946680	5583860	3892850	3287910	4484390	2794430	3097440	2005380	10729000	3159230	4128510	3798400
cg3202	Bacterial	Bacterial		2188630	2932680	1598240	1323770	1947840	1558880	3081790		909279	949302	1093910	2758580
cg3204	conserved	conserved		10661.9		4465.83		17306.5	9480.41					9915.75	5207.23
cg3206	PHOSPHOGLYCERATE	PHOSPHOGLYCERATE		360073	288967	305666	272600	1425190		348360	1262460	766612	435379	307817	1531750
cg3210	cell	cell		465347	744349	658596	1757430	1052850	711472	727782	1115020	721616	901698	858934	1611240
cg3212	putative	putative		3989140	6543680	9803860	1613270	2774740	5508620	3898610	2891980	2027090	2679540	2009350	1533810
cg3213	putative	putative		1426580	3951010	1593780	523011	3189110	9013690	2635250	8535170	3917050	3426560	4564860	1900890
cg3214	conserved	conserved		25423000	14072400	18617600	15331000	28048000	4700720	18357600	8440360	10088900	21191500	28864200	21752700
cg3218	PYRUVATE	PYRUVATE		995944	1332160	1884570	1563290	1332750	1508950	1692000	2156490	1086170	1100070	1400130	893439
cg3221	Predicted	Predicted			1545830	23673.9	59882.2	17875.3	7440000		62236.1	29950.8	14157.7
cg3223	NADPH-dependent	NADPH-dependent		2059100	892978	757353	1338350	729147	622729	1590930	1080850	628705	285668	480798	3490320
cg3224	Bacterial	Bacterial		2175290	1688130	1848980	2497170	2205590	2279010	2314260	1906200	2325860	1618230	1561710	1646020
cg3226	permease	permease		1506560	832688	2369040	490378	610505	2084130	3846940	3705370	1536740	1828980	2783870	987081
cg3228	hypothetical	hypothetical						324034						372187	81423.1
cg3230	putative	putative		99808.1	71801.6	65970.9	150854	121585	63379.4	105895			120740	120973	196291
cg3232	SECRETED	SECRETED		452936	122239	325155	237559	505407	490247	235592	868509	368854	183269	311481	114884
cg3233	hypothetical	hypothetical		130696	157715			144452	192493					118506	136273
cg3239	hypothetical	hypothetical		101734	44150.6	86051	60879.1			61060.6			75158.1
cg3243	Predicted	Predicted			165964	113509	191509	85670.7	132074	200160	138864	149366	70843.4	90332.7	73602.5
cg3244	conserved	conserved		146108000	115852000	121844000	142843000	172240000	105660000	95616700	113233000	91925900	81152900	108762000	81352200
cg3246	Bacterial	Bacterial		293214	154387	366668	1079610		313127	427543	225725		253477	218932	233838
cg3249	putative	putative				40268.3	21358.1			18765.9
cg3251	putative	putative		294756	188846	125851	187717	301879	277270	180566		321001	97477.7	137980	106505
cg3263	conserved	conserved		3228500	2772620	3693940	3125180	2512570	6422770	2033450	3285290	6479720	2391170	3709890	2596830
cg3264	conserved	conserved		281614000	167838000	208456000	275277000	249572000	237432000	158222000	161209000	208466000	95045800	132604000	135345000
cg3273	hypothetical	hypothetical		1788260	1592380	717410	1545050	1763890	3234130	397238	4706280	1824330	704555	800165	821415
cg3277	Uncharacterized	Uncharacterized		7656970	4886920	11024900	15994800	10124000	11937400	8461810	18536000	8417880	14139700	8388570	10632300
cg3281	PROBABLE	PROBABLE			417864		5964.91							238942
cg3282	Cation	Cation													854782
cg3290	PROBABLE	PROBABLE		2007340	414124	1029760	2924060	1804270	838640	734416		1934280	728621		767924
cg3291	Bacterial	Bacterial							190273
cg3292	Copper	Copper		79400800	3326280	10094800	47160100	79243000	15114100	11397900	27017000	50596200	7758900	10478700	10969400
cg3293	hypothetical	hypothetical		18255400	3010510	4789640	16038700	17505500	7003340	5290420	4996040	12146800	4840200	2393640	7334780
cg3295	Cation	Cation		486861	214006	157479	594952	347598	235965	126034		434599	127275	64980.6	130007
cg3301	Permease	Permease		121852	71502.8		153113	195440		0	0	0	188219	230045	172867
cg3312	putative	putative			71751.4	38032.3							85202.2	69633	169857
cg3315	Bacterial	Bacterial		9734280	13332500	5654830	7977470	9373600	8602280	15317800	11287500	11571000	4912970	5184540	15119600
cg3316	Universal	Universal		328641	1270440	374226	208664	1114180	531475	2108900	611682	440332	370851	391610	1926120
cg3317	putative	putative			341568	149588	387450	818362							321186
cg3318	Uncharacterized	Uncharacterized		831486000	152658000	255146000	1115680000	1128210000	388243000	343590000	861547000	441367000	140689000	357487000	152455000
cg3319	Uncharacterized	Uncharacterized		685677	734593	412540	661718	623338	881108	501936	573263	555581	593463	965933	629200
cg3321	ABC-type	ABC-type				110192	693641		129049				114203	128993
cg3322	putative	putative		1155330	758903	1293230	1725380	1726030	1671170	1586530	2394700	1158660	1365620	1811150	1501740
cg3323	Myo-inositol-1-phosphate	Myo-inositol-1-phosphate		1423100	2226370	1133780	1664570	955052	1041250	1203350	2538640	1178260	557155	1174350	718836
cg3324	putative	putative		672295	555009	355360	67981.7	797615	498655	413810			783501	1127020	455235
cg3325	conserved	conserved		826858	668469	778689	659827	1039040	827382	933901	1440130		913644	1710380	1431590
cg3329	conserved	conserved		172698	162437	126618	204079	222368	467481	200425		401708	148232	157438	185011
cg3332	PUTATIVE	PUTATIVE		550642	322832	834163	922052	496409	1538240	416003		662056	676786	553189	640062
cg3344	Nitroreductase	Nitroreductase		1580090	1617540	2654160	2276610	1860580	4011570	6283170	2812660	3867930	5542640	7291960	5263220
cg3348	Putative	Putative			1811490	1188230	1772810	993087	1302560	1014270	953368	1038310	776989	725934	947247
cg3349	conserved	conserved		8344090	18680000	4667700	3503110	4854190	6045010	3312370	5719540	7914960	3037100	4475320	2840870
cg3367	ABC-type	ABC-type		42785.6	95410.1	44959.1	30114.4	21691.5	51692.5	64164	81990.2	17981.1	23800	14442.1	63915.3
cg3370	PUTATIVE	PUTATIVE		410616	291902	395825	330172	483799	530538	327641	383944	329154	292911	470680	295150
cg3373	Bacterial	Bacterial		2217490	2124200	450387	366355	2514780	534285	2287380	899436	257379	779672	719378	6191720
cg3374	PUTATIVE	PUTATIVE				18353						45706.4		12072.9	17738.8
cg3375	Predicted	Predicted		233716	331176	225895	499657	215204	341456	264684	533335	344575	203622	309781	218589
cg3380	PUTATIVE	PUTATIVE			174718	115156			103230	99726.5	100896	95366.1			157481
cg3389	Predicted	Predicted		9475690	6317470	10567100	10826600	6625200	6915020	11134300	7686100	6238060	2665860	5484040	6948200
cg3390	Sugar	Sugar		768134	374687	290190	230052	610215	838546	523446	3271470	883133	431192	396642	446840
cg3393	putative	putative		232508			388264	274761	288467		223649	152457		136073
cg3396	Membrane	Membrane		722630	507676	574193	601599	450372	745865	325385	341854	439708	336768	311219	460447
cg3398	DNA	DNA		691878	371639	858210	1531910	593176	930207	1198420	3054750	3374050	611413	987442	1639780
cg3404	ABC-type	ABC-type		19176400	19994000	21614600	20862400	28483800	24539800	19164200	17695700	20668800	22486900	20883100	17759100
cg3405	NADPH	NADPH		3987440	2227310	4933930	6435920	2346480	2167040	2935660	3233790	3342850	4619000	4965950	2503610
cg3407	putative	putative				177029	137065			143765
cg3408	hypothetical	hypothetical					199261	886211				336515	181682	315819	647254
cg3411	Copper	Copper		2427820		805947	1500300	2232690	2713660	1544990		1882640	791775
cg3414	Putative	Putative		28814400	23596100	11435800	27016200	12403600	28661100	7239300	11230800	18822200	11251100	10396200	23379400
cg3417	NTP	NTP		849737	1672400	861469	1074460	854869	1089220	896758	684883	866304	1073800	1015300	1152380
cg3418	putative	putative		212810	245802	87387	116189	248049	305494	139098	176212	124262	87854.6	177207	107613
cg3419	Uncharacterized	Uncharacterized		174233	77509.2	133062	190239	471790		114706	251895	352455	69065.1	427403	204247
cg3425	conserved	conserved		22897.4	25080.5	10540.3	19926.6			11893.8			12640.1	18666.6	14828.5
cg3429	Preprotein	Preprotein		218435									415565	718330
cgtR10	putative	putative			19340.6	13741.3	33837.5			21928.4				7221.67
cgtR11	putative	putative		14418100	6824640	10313600	14652700	10900600	9667550	16077000	8053310	9793150	10786600	7418130	8260840
cgtR2	putative	putative		415199	281177	301020	95276	195001	251840	174218	101723	50209.1	143019	160352	91198.4
cgtR3	putative	putative		3938720	8939360	7842000	6322530	5774010	4566390	6289840	5301340	5593880	4223480	5366310	8953300
cgtR4	putative	putative		4062970	6609670	2815180	2133440	3052360	5776800	4402510	8007770	4940450	2648910	3338990	5549970
cgtR5	putative	putative		3574620	3119930	5340640	6638200	5244750	3813200	7679850	5489240	5790120	2729610	2995140	4719550
cgtR7	putative	putative		1555550	1761340	2056840	1750440	948855	1100980	2295790	1413270	1316280	1444810	1135330	2315340
cgtS11	probable	probable		370762	601551	642124	676954	487676	426266	776568	1177360	660196	817323	859891	507871
cgtS2	probable	probable		1078020	997930	681774		1028050						901765
cgtS3	probable	probable		2516540	1633210	2821370	1386520	3061240	2885950	1740510	3946950	3291560	1674590	1879810	1685180
cgtS4	probable	probable		667752	1420990	1295510	1236680	775540	845963	1187150	1183000	842724	725576	731062	687190
cgtS5	probable	probable					7888.43		9391.13					315249	2499.77
citB	TWO-COMPONENT	TWO-COMPONENT		313661	344065	372207	283656	437195	464695	0	0	0	233027	354629	177462
citE	CITRYL-COA	CITRYL-COA		484162	514538	275474	1543790	1479330	379600	0	0	0	0	0	0
clpB	PROBABLE	PROBABLE		44499600	58704000	74186300	52991700	46643700	40458200	66373600	43855400	56342000	86115000	77495300	74909100
clpC	PROBABLE	PROBABLE		47235600	61039800	75868900	70879300	45864000	50673100	61342100	46731200	53484800	73213500	70166200	69886000
clpP1	ATP-DEPENDENT	ATP-DEPENDENT		26531800	16267600	18338500	17964800	17776100	20567900	31501500	44871900	22119800	58584000	52740000	53982800
clpP2	ATP-DEPENDENT	ATP-DEPENDENT		41403300	46285300	69729400	63347400	34975800	62251000	50990400	101507000	56786900	72907900	92803000	56369000
clpX	PROBABLE	PROBABLE		1677170	4329480	4409000	4182730	2633790	2532710	3068740	2065610	2131020	6418670	8670510	4944300
cmk	CYTIDINE	CYTIDINE		2516640	2609940	2297280	4363580	3199940	2371400	3615870	2028720	2711840	2619160	3001090	3057300
cmt1	Trehalose	Trehalose		218921000	102806000	123247000	358912000	248272000	369626000	60970900	442901000	242161000	88661600	181367000	166818000
cmt2	Trehalose	Trehalose		544548000	185228000	327737000	688203000	858912000	875365000	241592000	1578130000	768424000	268898000	530518000	369275000
cmt3	corynomycolyl	corynomycolyl		18260300	7145920	8856440	23361800	28524500	32410300	8111230	43071600	23031800	9797660	17749500	16263500
cmt4	corynomycolyl	corynomycolyl		16309500	6332870	6557760	25120300	40523600	37860800	5078100	38016900	12653000	14352700	15729800	29971000
cmt5	corynomycolyl	corynomycolyl		10101100	5174070	7077890	12804200	19556000	14354300	6229650	20535200	14483500	5239860	8203920	6734890
cobA	UROPORPHYRINOGEN	UROPORPHYRINOGEN		824738	932088	781306	951381	641061	910230	890798	2338210	801453	780663	1046930	783448
cobL	PRECORRIN-6Y	PRECORRIN-6Y		998043	1614320	661809	612452	539406	809292	0	0	0	0	0	0
cobQ	COBYRIC	COBYRIC		2357060	2984920	2856980	2806770	2573680	1870320	2583950	2951290	1920090	2838320	4238170	2823500
cobT	PROBABLE	PROBABLE		3964640	7164050	1948230	2734200	4077460	3601590	3171880	5234720	2615370	3014140	2891220	5419820
cop1	Trehalose	Trehalose		204686000	86904200	112710000	154881000	305744000	270848000	77030200	415430000	232245000	57280800	147170000	99556600
cps	NON-RIBOSOMAL	NON-RIBOSOMAL		0	0	0	0	0	0	126973	407543	167138	174758	255799	182446
cspA	COLD-SHOCK	COLD-SHOCK		1101060000	346043000	397459000	1808060000	1923520000	2144500000	709513000	2438630000	1922630000	371955000	904744000	619491000
cspA2	COLD-SHOCK	COLD-SHOCK		53408600	20455600	22367600	47325500	111052000	35508800	74740900	106815000	76591700	14838200	20522300	22710000
cstA	PUTATIVE	PUTATIVE		970433	505218	653101	941926	468025	737880	1286560	1741020	914303	806317	1188220	620920
ctaC	CYTOCHROME	CYTOCHROME		7670220	5199950	6491800	7918060	7053850	7392840	8524710	7580730	11008000	5901490	8969850	5226400
ctaD	PROBABLE	PROBABLE		5056140	2900560	2356310	4092590	4600830	4996640	7332210	5808160	2864860	7273800	8323820	6115560
ctpC	Cation	Cation		589502	183790	353282	362980	429616		233848		800022	231144	235350	247243
cwlM	N-ACETYMURAMYL-L-ALANINE	N-ACETYMURAMYL-L-ALANINE		4845060	5785050	6408570	10062900	4687980	10023600	6280680	11807200	7871690	9072940	8035560	9665210
cyaB	putative	putative		49793.7		33477.4	58219.9		133629	57652	428851	90035.6	82939.7		407270
cydC	ABC-type	ABC-type			40136.3	52444.2		25106.7	52245.6	49661.7	87720.1	46245.6	51914.8	51988.5	32359.9
cynT	CARBONIC	CARBONIC		9655700	15595800	12370800	13561800	15951500	12069400	18946100	20061100	16513400	8094630	12584900	21702000
cysD	Sulfate	Sulfate		272437		183970	401301	843126	492562	230614	945976	816250	1519880	2808180	1743390
cysE	Serine	Serine		953928	375805	682496	748393	353849	619684	654030	492790	701447	378891	426017	446769
cysH	Phosphoadenosine-Phosphosulfate	Phosphoadenosine-Phosphosulfate		0	0	0	0	0	0	1188300	1189660	2152590	1374670	8084480	4131980
cysI	Sulfite	Sulfite		1557340	652379	1409730	1086260	806531	1529990	4604780	3933890	4894230	5036410	7221490	14602800
cysJ	Probable	Probable				43409	117675	1067990		1305200	438041	1553670	4174050	7100350	7080920
cysK	O-Acetylserine	O-Acetylserine		205352000	169324000	192831000	211556000	154144000	163272000	165409000	208796000	173380000	201220000	235394000	268387000
cysN	Sulfate	Sulfate		1395970	479191	369392	494818	1667870	943395	1007190	5188630	3318160	5031530	9925560	11227800
cysQ	3'-Phosphoadenosine	3'-Phosphoadenosine		9404020	12089000	11529400	7727820	9695700	13448300	8362060	10667900	13491400	11300600	15920100	10670600
cysS	CYSTEINE	CYSTEINE		3232850	3024410	2118090	2484610	2380550	2088490	3207060	4367850	2380260	1921850	2906670	2933780
cysS2	PUTATIVE	PUTATIVE		11204400	9756390	11921900	6430100	6591010	5989470	5941200	10111900	5110300	10921900	13205300	8332550
dacB	PENICILLIN-BINDING	PENICILLIN-BINDING		713931	542399	641157	818723	588580	940665	782803	793044	1033990	304505	649791	621447
dadA	PUTATIVE	PUTATIVE		1508880	1939700	1443510	876795	1514620	919560	2006770	906206	854657	973402	1489440	1571640
dapA	DIHYDRODIPICOLINATE	DIHYDRODIPICOLINATE		37258500	50480300	31465500	25525300	36898400	32008800	29184200	34668200	31433700	24815900	34375800	57324600
dapB	DIHYDRODIPICOLINATE	DIHYDRODIPICOLINATE		3229770	3228280	1872050	1353450	2059150	3744010	8255200	5627910	2883520	2575940	2284710	2146790
dapD	TETRAHYDRODIPICOLINATE	TETRAHYDRODIPICOLINATE		3297100	3355800	4274650	9995260	3962170	4817730	5748440	5756260	3041240	8192050	8378760	12065900
dapD2	similar	similar		4597420	2508480	2783280	3005900	2211660	4224270	2471270	2304130	2576110	1672010	2208760	3228520
dapE	SUCCINYL-DIAMINOPIMELATE	SUCCINYL-DIAMINOPIMELATE		948870	755878	2291980	1717760	962550	1603890	1304750	2806740	2086540	2685320	3551810	1977550
dapF	Diaminopimelate	Diaminopimelate		5081610	3007250	5965890	4996430	8565960	4958750	5302530	11909600	4703520	5885850	8036060	5175380
dcd	DEOXYCYTIDINE	DEOXYCYTIDINE		61554600	41161700	22860700	59124100	62911900	17289600	59402600	33485600	27487100	39629400	39725800	54539000
dcp	PROBABLE	PROBABLE		9996100	13391000	15796200	13149100	11249600	11645800	8678990	11459500	10597600	6694250	12910900	10632800
ddh	MESO-DIAMINOPIMELATE	MESO-DIAMINOPIMELATE		32072000	32031800	27940000	30872500	25959800	25767900	31498900	30438900	24440700	38244200	39741200	36589800
ddlA	D-ALANINE--D-ALANINE	D-ALANINE--D-ALANINE		110371	234223	153192	390592		273930	213021	571624	345246	247263	250814	211772
def1	POLYPEPTIDE	POLYPEPTIDE			68114.9	75679.8	59923.5	75000.6	58927.7	110079	113795	135569	71849.4	85908	77510.3
def2	POLYPEPTIDE	POLYPEPTIDE		2418200	4576100	5634600	4310250	3145330	2670310	4993060	2849670	1914500	1971150	2504160	2539890
deoC	DEOXYRIBOSE-PHOSPHATE	DEOXYRIBOSE-PHOSPHATE		1663560	1003400	1860430	1383520	993947	1875750	1306270	2828020	3533820	1686920	2096040	1331980
devB	PUTATIVE	PUTATIVE		26060000	22963300	41335900	51201500	36083200	49756300	45370900	47890400	36799200	36849300	37029800	25150500
dfp	DNA/PANTOTHENATE	DNA/PANTOTHENATE		4849780	5281210	8650240	5804350	4391490	7157360	10244300	5988440	6935330	6118870	9091230	15527000
dgt	DEOXYGUANOSINETRIPHOSPHATE	DEOXYGUANOSINETRIPHOSPHATE		6371330	9090080	5744850	5164930	4792440	4073790	4345890	5287210	5008960	5189400	4660720	3413610
dkg	2,5-DIKETO-D-GLUCONIC	2,5-DIKETO-D-GLUCONIC		18262900	13327200	11751400	17851900	13628700	20762200	12144900	11453000	11800800	7711100	8027400	7393550
dkgA	2,5-DIKETO-D-GLUCONIC	2,5-DIKETO-D-GLUCONIC		2863000	1492340	1927880	3939570	3710940	3547130	2091640	1244800	2689130	1768130	2248970	2872770
dld	D-LACTATE	D-LACTATE		4644050	9629290	5061340	4531240	7147800	11411000	5548560	5877200	13198400	5050260	11976600	8154840
dnaA	CHROMOSOMAL	CHROMOSOMAL		1228650	818589	790059	2090330	1073810	726073	792534	1465290	676378	1558670	1329170	696758
dnaB	PUTATIVE	PUTATIVE		1533330	2997680	2585700	1631290	1256250	2142290	3023610	1095180	1637510	1864310	1179320	2910510
dnaE1	PUTATIVE	PUTATIVE			81080.2	142431					106907		253412	116336	273953
dnaG	DNA	DNA			676413	277668	877343	790226	1055340	725338	919125	1068480	537583	873739	736697
dnaJ	CHAPERONE	CHAPERONE		25130300	20564800	22674200	28222700	24235000	24771200	57799300	40718100	49018700	54768100	55002200	48324600
dnaJ2	Molecular	Molecular		16334500	12664700	15981600	14766300	14937400	13221200	16123900	18613900	15812100	27998800	21059200	15550900
dnaK	Heat	Heat		228607000	174856000	266494000	192424000	175223000	247180000	295921000	345113000	435456000	649580000	645146000	541231000
dnaN	DNA	DNA		7707530	5256760	9052950	5468910	7160230	3420070	7591570	7868230	5343200	6371310	12679000	7138170
dnaX	PUTATIVE	PUTATIVE			33273		14044.7		12696.7	188395	16015.5	9810.32	7980.51		126148
dnaZX	DNA	DNA		295394	213904	175831	786977	455445	354664	274710	794173	679524	191811	274196	326818
dps	STARVATION-INDUCED	STARVATION-INDUCED		47617000	24131700	28384100	57871900	50857200	45917500	25206600	48861600	38122900	21133500	20202400	29912800
dtsR1	ACETYL/PROPIONYL-COA	ACETYL/PROPIONYL-COA		7518980	4472670	6579000	2478200	5727520	10497600	4248600	15366400	10188900	6484090	10803800	6972080
dtsR2	ACETYL/PROPIONYL	ACETYL/PROPIONYL		25177200	29413300	33993200	28299600	26547900	30893700	30702500	43324000	27050100	23450300	32673300	34827900
dtxR	IRON	IRON		10868700	12155400	5521850	7948600	12911200	7353040	11082000	11253300	9850680	4112550	5607260	9971840
dut	PROBABLE	PROBABLE			341866	247969	317977	336340	561793	401264	337495		271890	310644	362089
dxr	PROBABLE	PROBABLE		2366330	4890560	5179890	5271920	3022090	2737000	4015250	3911010	2743980	3550260	2788160	1550490
dxs	PROBABLE	PROBABLE		1023410	1395290	1399650	2061060	861164	1467010	2386420	1839060	1373720	1094640	1111720	1625510
efp	Translation	Translation		147680000	142850000	139250000	239904000	183502000	141041000	163955000	186037000	137856000	155276000	145026000	175033000
embC	Probable	Probable		886975	663729	1053260	1913570	1511810	1442140	1290350	2517270	1981270	1028150	1347920	1311770
eno	ENOLASE	ENOLASE		821295000	876161000	964992000	802747000	801406000	692030000	778988000	867289000	646101000	672384000	663772000	632315000
entC	ISOCHORISMATE	ISOCHORISMATE		1143350	942392	2174820	493042	968846	1900020	1654010	1556050	1880650	3081930	3072510	738961
fabG2	PROBABLE	PROBABLE		220768	300118	148119	183936		379053	155188					106563
fadD15	LONG-CHAIN	LONG-CHAIN		2192650	1901510	3932080	2310020	2086280	3145490	4405070	3517590	2293160	2478040	1978030	2523440
fadD2	PUTATIVE	PUTATIVE		17012400	17341400	24754200	20094100	13468500	15215300	23950900	12912700	16729500	13871100	14898500	19581900
fadD4	ACYL-COA	ACYL-COA		782045	497930	1038770	689737	1192550	685311	748198	2303040	410855	1000750	1619930	592746
fadD5	LONG-CHAIN-FATTY-ACID-COA	LONG-CHAIN-FATTY-ACID-COA		17808600	21675300	16328600	16499400	19669100	18517600	43551900	27600500	21488100	17453400	26247400	22712900
fas-IA	FATTY	FATTY		3088570	4065730	5029200	2933630	3097680	4895930	5323300	12979300	4794880	6961620	8606460	4496440
fas-IB	FATTY	FATTY		12946800	12183600	13060700	10935900	8899330	15609200	19255700	33816400	13560200	15541900	22715000	22805000
fda	fructose-bisphosphate	fructose-bisphosphate		49970000	64611500	43654500	59691200	37086800	46058000	47595900	60806400	44201500	41613200	59638800	44440800
fdhF	PUTATIVE	PUTATIVE		6743850	4025580	3993250	3063240	6398840	4147970	10424500	4274320	2708480	3470910	4467120	4578670
fdxB	FERREDOXIN	FERREDOXIN		270857	104469	175919	279315	722743	380986	157752	462577	203076	282506	368620	175407
fdxC	FERREDOXIN	FERREDOXIN		189469000	60825000	34673200	80066000	208207000	102644000	133156000	187785000	110539000	26314300	48255700	91375500
fixA	PUTATIVE	PUTATIVE		14014700	19599200	29780500	15066900	12710100	16968500	20580700	19493300	18523200	20068900	21439000	29850700
fixB	PUTATIVE	PUTATIVE		5602660	8691360	13529400	6938170	5167510	10947600	8011940	8201290	10441200	12201700	15690800	8661380
fkpA	PROBABLE	PROBABLE		107978000	39291700	36349400	98766400	122700000	129014000	46172300	144682000	96202900	31911700	52422900	45908300
fmt	METHIONYL-TRNA	METHIONYL-TRNA		8703270	5384520	6417430	7313310	6415840	9264210	5291900	15663100	8927520	5676760	7751160	7577600
fmu	PUTATIVE	PUTATIVE		3962640	5866420	3699140	3253200	4070300	3418870	3682670	3586930	3495100	5546270	4563140	4486880
folA	DIHYDROFOLATE	DIHYDROFOLATE		3361500	4145150	6034220	5633020	2054510	2663690	4753660	3283080	2400470	5151760	2925010	6078570
folC	FOLYLPOLYGLUTAMATE	FOLYLPOLYGLUTAMATE		15285700	10026900	15180400	20470700	12235700	10203000	15361600	8155400	7363560	23155400	21865200	11656900
folD	METHYLENETETRAHYDROFOLATE	METHYLENETETRAHYDROFOLATE		23120700	22193000	28573500	20090500	24539600	35213800	27855100	43712700	32422800	24959400	42636700	26947300
folE	GTP	GTP		155296	144552	283524	93091.5	180909	229625	0	0	0	493946	475117	1067120
folP1	DIHYDROPTEROATE	DIHYDROPTEROATE		3085860	1301120	2337040	2911730	602112	2718160	1067160	2459500	2069620	682018	1887370	776021
fprA	PUTATIVE	PUTATIVE		18391900	16426400	22180300	18073200	15169300	30710100	18858500	26743900	27585300	23306700	32772100	27207400
frr	RIBOSOME	RIBOSOME		311028000	300289000	226033000	356040000	348603000	378076000	454718000	303969000	310797000	199368000	209405000	400097000
ftn	Ferritin-like	Ferritin-like		136194000	48999600	40449600	118434000	131063000	56600900	87970000	81124200	95960900	28923500	56090500	44945200
ftsE	CELL	CELL		1336620	1854010	1032100	2337990	1672540	791676	1324560	2199990	1178410	807279	1347140	1635150
ftsH	CELL-DIVISION	CELL-DIVISION		7462490	14327600	8817640	9969120	10450000	12345300	16117200	14304600	12011400	8821930	12711400	14678100
ftsI	PENICILLIN-BINDING	PENICILLIN-BINDING		4032410	1925290	2136920	3495010	7484870	3965210	1807660	8083350	4149490	2422250	2085260	1548470
ftsK	CELL	CELL		609572	891574	570463	465413	576690	342886	656768	323767	576137	274325	470881	505147
ftsQ	Cell	Cell		4397220	622966	1678190	2376240	2120820	1514280	832566		1921980	2685460	2604970	897404
ftsY	Signal	Signal		9049190	10509100	9026740	10739800	8454850	9225680	10949400	9704120	6127810	7898700	6488290	8786060
ftsZ	Cell	Cell		24755300	27308200	29498000	37396900	25940800	31588600	32744900	44733200	34911600	21537700	30195600	25931300
fum	FUMARATE	FUMARATE		25530500	29481900	33673500	31320400	30050800	29992400	26545700	43025200	36577800	25915900	28969100	26668800
fusA	ELONGATION	ELONGATION		38879200	45692500	44779600	52142900	37741700	53192800	70820100	82386800	58479200	52720700	76420800	58524500
gabD2	PUTATIVE	PUTATIVE		5624700	7824680	3820780	8092620	4651100	3530430	8148430	5220670	4617520	3067450	2676520	12076700
gabD3	SUCCINATE-SEMIALDEHYDE	SUCCINATE-SEMIALDEHYDE		411150	549414	426915	441070	554149	635341	430173	587985	389729	447270	705066	391775
gabT	PROBABLE	PROBABLE		275661	367628	301882	587849	409123	367075	270167	674570	434985	472264	790249	813010
galE	UDP-GLUCOSE	UDP-GLUCOSE		2666320	590995	746240	1297570	1364500	1825390	1319690	1575580	1489550	459950	981260	624047
galU1	UTP-GLUCOSE-1-PHOSPHATE	UTP-GLUCOSE-1-PHOSPHATE		34138100	22464000	17288800	22750000	29193700	31720100	19153800	19730400	21401800	22146700	28239100	18991500
galU2	PUTATIVE	PUTATIVE		52387300	33884700	34289300	30134300	35069200	43892900	38339300	32627100	29340700	26985500	49469500	37286300
gap	GLYCERALDEHYDE-3-PHOSPHATE	GLYCERALDEHYDE-3-PHOSPHATE		1530910000	1714280000	1499850000	1564170000	1461720000	1366500000	1439580000	2087020000	1317140000	1482120000	2259180000	2132980000
gapX	similar	similar		8426420	7922740	11570500	10508800	4496400	8270030	10951200	8631520	7394480	6155770	4889500	8097100
gatA	PROBABLE	PROBABLE		19221200	11644100	9225790	14306600	12081600	19579200	18124900	21708200	16410000	10861400	17253400	18693500
gatB	PROBABLE	PROBABLE		8512350	8942720	8493940	10030500	5485930	9595720	9602720	9616940	6692490	8393060	8077420	11707000
gatC	GLUTAMYL-TRNA(GLN)	GLUTAMYL-TRNA(GLN)		26856600	13372200	37137600	29062800	26311100	54024800	11919000	72024000	24549600	9391390	24927100	16430800
gcp	PROBABLE	PROBABLE		2553270	1753720	2706150	2666690	1652900	3678330	4059490	2734460	2796980	3133400	3449290	3454170
gdh	NADP-SPECIFIC	NADP-SPECIFIC		11193000	8719710	11212600	11344700	8668900	11105500	9839140	15237500	8550940	9740630	12983500	9145280
ggtB	PROBABLE	PROBABLE		15604700	16782000	19375600	15998200	16259400	18848400	16771300	24799100	13979900	11386500	14102400	10722200
gidB	GLUCOSE-INHIBITED	GLUCOSE-INHIBITED		2164800	2430390	2151820	1641480	1914710	2179130	2616950	1552610	1893500	2191490	2751460	1352590
glbO	Hemoglobin-like	Hemoglobin-like		41826700	14598800	10766800	27645300	42457200	33120300	15068100	46468500	28796600	14705900	23456300	10998800
glf	UDP-GALACTOPYRANOSE	UDP-GALACTOPYRANOSE		5304870	10154000	3669760	3458730	4040080	6785300	3824880	7804600	11522700	3557050	3564040	7759680
glgA	GLYCOSYL	GLYCOSYL		4700700	5650340	5941460	4351880	4138920	4625250	2838920	6297780	3134900	2954610	6140490	2786530
glgB	1,4-ALPHA-GLUCAN	1,4-ALPHA-GLUCAN		2025360	2662060	2287620	1218510	1335370	867311	2024460	2477580	1280830	1063440	2846550	2180450
glgC	ADP-GLUCOSE	ADP-GLUCOSE		13229300	15257600	10483500	10401000	10051600	11749400	10844200	11386700	7928590	10602900	12420300	10877600
glgE	PUTATIVE	PUTATIVE		15058300	10434300	10239600	8578690	6859270	9623410	7029860	6576340	6552340	5800470	7158180	7870900
glgP1	PUTATIVE	PUTATIVE		17628600	25308700	19391000	30230500	27229000	25591500	31104800	45841900	19422600	23028600	39352300	33011900
glgX	GLYCOGEN	GLYCOGEN		1761460	1827190	4573390	2331760	3009040	4165190	2295550	2357330	3579560	2271700	5442280	3116080
glk	GLUCOKINASE,	GLUCOKINASE,		7227670	3032530	2732870	4789690	5026850	5239590	3756350	11942500	4314990	2725410	6919880	2815580
glmS	PROBABLE	PROBABLE		4984320	9275860	7623810	5215170	5409320	7352980	8953790	20153900	7729100	10704800	17218000	10065400
glmU	PUTATIVE	PUTATIVE		2959870	4319090	3251510	6187880	2792660	3645910	5343020	4657400	1776470	2979830	3929350	4127030
glnA	GLUTAMINE	GLUTAMINE		40678100	33319000	29863900	39313800	23527600	37922600	46816200	53764000	29942100	39441800	35129900	38701300
glnA2	GLUTAMINE	GLUTAMINE		450657	673567	872254	1543650	388526	800509	484830	1482130	559896	513797	815398	329936
glnK	Nitrogen	Nitrogen		6046710	8643250	11240600	7404660	9313350	5675470	15023100	8470140	4945970	8795050	11254700	15919000
glpD	GLYCEROL-3-PHOSPHATE	GLYCEROL-3-PHOSPHATE		2202020	2939190	1972200	2883780	1505290	3968890	2252460	15515200	2225820	1292210	1697850	1932920
glpK	GLYCEROL	GLYCEROL		2534970	2303630	3188980	2876330	3458750	4635720	4318430	5347730	3089820	1944520	4247210	1790920
glpQ1	PUTATIVE	PUTATIVE		511145	556289	674273	219641		558508	839432	1443560	346439	554714	386922	543583
glpQ2	PUTATIVE	PUTATIVE		746691	338568	322784	307957	581071	515848	884095	1086790	537574	547379	989889	700079
glpX	GLPX-LIKE	GLPX-LIKE		42725700	45542400	43047500	50451700	37657400	32574700	47467700	57086500	31363200	38685600	40293400	37906300
gltA	CITRATE	CITRATE		169966000	109273000	115946000	132473000	99908800	184876000	132857000	95291800	124424000	75722400	93399500	104377000
gltB	GLUTAMINE	GLUTAMINE			1365570	201630		486659	824422	573772		655695	443107	256615
gltS	PUTATIVE	PUTATIVE		13569000	11437000	14489000	13861200	10798100	13249000	15862000	15818700	15047900	12001300	16608200	15877900
gltX	GLUTAMYL-TRNA	GLUTAMYL-TRNA		355810	689406	279210	700827	335614	259967	786839		474621	380415	948970	661630
gluB	GLUTAMATE	GLUTAMATE		601918000	618117000	640445000	450227000	773592000	474632000	460330000	326568000	352860000	226232000	244474000	418468000
glxK	PUTATIVE	PUTATIVE		3457690	2774170	4949130	4768070	3541550	5202380	4826810	4789620	4598270	3331850	4822520	3294610
glyA	Serine	Serine		15525700	18377300	23427900	17846500	19715500	20300700	21574000	36518100	19049800	19580300	31224500	23675500
glyS	GLYCYL-TRNA	GLYCYL-TRNA		18084100	19858900	17452300	13977200	13971900	15935300	29508600	28369500	17809000	20181600	26925000	28249300
gmk	PROBABLE	PROBABLE		92974600	59934600	70942200	70673800	102453000	105412000	73767900	152806000	122207000	50818600	82474700	55701900
gnd	6-PHOSPHOGLUCONATE	6-PHOSPHOGLUCONATE		7076980	8471440	9220610	8759320	4745040	8757700	6410970	10179800	7834520	4418830	7995730	7375110
gntK	PUTATIVE	PUTATIVE		93394.3	80255.7		44407.3	54810.9	62844.6	56603.1		99523.7	47720.6	134598	89633.1
gor	PUTATIVE	PUTATIVE		2755530	3523260	5725200	3737850	2159900	2939150	3604230	3156200	2152950	3016960	2610470	3228040
gpmA	PHOSPHOGLYCEROMUTASE	PHOSPHOGLYCEROMUTASE		315296000	315027000	257367000	263094000	217492000	269626000	221105000	275456000	269792000	220840000	248231000	221053000
gpsA	GLYCEROL-3-PHOSPHATE	GLYCEROL-3-PHOSPHATE		4378400	5987190	3124350	7805380	4148010	3531140	6350880	3299520	2736760	3203820	4247170	8518940
gpsI	PUTATIVE	PUTATIVE		16556800	15521300	11586300	16015600	16281600	13829200	14806100	21616400	13252000	14985500	29548200	23546900
gpt	PURINE	PURINE		1937090	2085810	1751200	1508430	1658170	2838660	1907630	2160210	2123180	2613290	3349640	1459040
gpx	GLUTATHIONE	GLUTATHIONE		8777790	6429090	7233750	6801610	5740400	13231100	5362770	10949800	9064560	6450620	6634120	6983590
greA	Transcription	Transcription		15731800	8348520	10620700	27247300	21338700	23780000	8277900	28220700	19046400	8787120	15810600	14015500
groEL	Chaperonin	Chaperonin		74483700	73541100	101300000	121501000	106723000	81179100	134216000	151328000	127675000	174762000	206510000	201789000
groEL'	60	60		5869720	1445540	2186510	7303200	13123900	13371400	11875000	24522300	14372300	31840600	41841900	34194700
groES	Chaperonin	Chaperonin		670254000	319742000	591962000	545723000	660974000	1357790000	390504000	1076700000	625228000	640113000	923612000	627511000
grpE	Molecular	Molecular		186761000	99054300	145522000	231297000	329104000	282466000	285383000	389896000	329115000	391387000	477194000	381087000
guaA	PUTATIVE	PUTATIVE		3291710	3312100	3110550	6087420	4106420	6083620	3119870	6734050	4792340	3719600	4708010	4489680
guaB1	INOSITOL-MONOPHOSPHATE	INOSITOL-MONOPHOSPHATE		1976740	2840370	2897500	2788040	1315750	2254220	2534130	2805040	1982540	3403510	3020840	2240060
guaB2	INOSITOL-MONOPHOSPHATE	INOSITOL-MONOPHOSPHATE		26496700	32130300	37854200	30232300	30885100	25571700	43049300	42316600	23441600	38889800	49612200	37191400
guaB3	IMP	IMP		9300250	11109900	10846300	11420300	12262000	9526520	13275800	18533300	8954870	12088900	13707600	12916500
gyrA	DNA	DNA		2168510	3065380	3157850	2586630	1816680	3133930	4439740	5124350	2266230	3364850	4174610	5634970
gyrB	DNA	DNA		19157000	23342800	21382600	22408700	13878700	24559200	25245100	24895400	23271700	23180800	18818400	26457200
hde	PROBABLE	PROBABLE					1703000			1011570					1055150
hemA	GLUTAMYL-TRNA	GLUTAMYL-TRNA		1269630	954086	1498670	2227250	597297	1431050	2596400	1916910	1012270	1345250	1104790	1077620
hemB	DELTA-AMINOLEVULINIC	DELTA-AMINOLEVULINIC		4942700	4818640	7976040	6467200	4303710	7936970	5013280	10013100	6807120	6067870	7617710	5141360
hemC	PORPHOBILINOGEN	PORPHOBILINOGEN		12015800	12193300	4692510	8320680	6432410	9331960	6713700	13263400	11777200	8672810	12531300	9078180
hemD	UROPORPHYRINOGEN	UROPORPHYRINOGEN		3624600	2398290	2203670	1861890	3862730	2798330	4348440	4640420	4608350	1839240	2293940	3705280
hemE	UROPORPHYRINOGEN	UROPORPHYRINOGEN		9288780	6279860	10942500	5271170	7089530	11958500	10221100	8770000	10216500	5307680	6891690	7786830
hemH	FERROCHELATASE	FERROCHELATASE		168417	149468	226702	0	0	0	0	0	0	262677	406034	78964.5
hemL	GLUTAMATE-1-SEMIALDEHYDE	GLUTAMATE-1-SEMIALDEHYDE		6132200	7724040	6861080	5155820	6504190	5895880	7947120	10771800	4660490	6952210	8327440	7282380
hemN	PUTATIVE	PUTATIVE		244984	198897	300971		288949	297564	176863	651726	220397	100983	226470	161331
hemY	PUTATIVE	PUTATIVE		3142900	14282900	4216790	2838270	7608460	2668530	3899130	4801050	1943100	4675710	11022400	5427680
hipO	PUTATIVE	PUTATIVE		582245	353183	393556	1095810	480565	304277	351752	510467	334063	434058	932770	317099
hisA	PHOSPHORIBOSYLFORMIMINO-5-AMINOIMIDAZOLE	PHOSPHORIBOSYLFORMIMINO-5-AMINOIMIDAZOLE		3854460	7732290	4861920	5895420	3499250	4539380	6908580	7230910	5401300	4838230	5560120	10424800
hisB	IMIDAZOLEGLYCEROL-PHOSPHATE	IMIDAZOLEGLYCEROL-PHOSPHATE		281018	342135	354087	726794		333032	514018	749588	406221	380992	504181	375962
hisC	PROBABLE	PROBABLE		3989600	7347840	8109790	1839140	3608940	4538340	4025030	2115390	3799190	5880400	7677340	4371080
hisD	HISTIDINOL	HISTIDINOL		9401580	10665200	8183310	9984400	21964200	12579800	11887000	12677000	12406700	7886000	16783500	18576200
hisE	PHOSPHORIBOSYL-ATP	PHOSPHORIBOSYL-ATP		5330780	957341	1389440	4638090	7354020	11580300	0	0	0	3713090	1541300	1537460
hisF	PROBABLE	PROBABLE		4256140	3141150	4620320	4009260	2045340	3803550	5001480	3799160	4014780	3881530	4881660	3976550
hisG	ATP	ATP		45857300	38772400	35772500	33168200	39422400	32979600	48714300	33102800	32134600	33694900	36621500	51380800
hisH	IMIDAZOLEGLYCEROL-PHOSPHATE	IMIDAZOLEGLYCEROL-PHOSPHATE		3343020	2075520	3389650	3734930	2444930	5412540	3235250	4662120	3819730	3824740	4261330	4697150
hisI	PROBABLE	PROBABLE		2775590	2797180	1664840	3223050	1277360	3155350	1355600	1277070	3007670	875138	1050400	882466
hisS	HISTIDYL-TRNA	HISTIDYL-TRNA		8340480	10829500	9914620	9035390	5915100	8492550	7149580	8281560	6256280	10332600	9798740	9118630
hmp	FLAVOHEMOPROTEIN	FLAVOHEMOPROTEIN		0	0	0	0	0	0	0	0	0	672448	548165	3261240
hmuO	PROBABLE	PROBABLE			73436.5	236865	274113	289298		195444	151244	344632	75020	302790	122173
hom	Homoserine	Homoserine		3606550	2647870	3860250	2958900	1793580	2450110	2471880	2272900	2500040	2568970	4411980	3301660
hpaG	PUTATIVE	PUTATIVE		320421	239217	538584	695616	339020	217596	245099		272144	303176	428149	245522
hpt	HYPOXANTHINE	HYPOXANTHINE		5096900	6655980	5765540	8481140	4923520	5885930	6322890	7523790	5373580	5111660	7169480	12848200
hrcA	Transcriptional	Transcriptional		283953	293692	169616	183841	377380	240760	111549	93166.9		149030	85900.8	185323
hrpA	PROBABLE	PROBABLE			203456	130259	165825		199614	245309	302298	170694	228375	316553	239531
hscA	Molecular	Molecular		1827960	1811210	2500800	1360590	3220970	3162520	1328190	7495000	2745020	3131290	3672130	2158330
hspR	TRANSCRIPTIONAL	TRANSCRIPTIONAL		305307	449020	637879	443584	318102	419741	680665	432423	523694	991503	765312	801767
icd	ISOCITRATE	ISOCITRATE		27136900	30527200	30352100	32811600	18441700	25767100	30269300	27135000	23340300	28891000	34639300	45359700
idhA1	MYO-INOSITOL	MYO-INOSITOL		180433	431566	467285	228747	289413	256516	225586	390085	190726	122024	301326	110023
idhA2	MYO-INOSITOL	MYO-INOSITOL		218984	140987	227789	379138	554343	1086870	217650	263401	419627	184927	725744	996474
idsA	PUTATIVE	PUTATIVE		6026670	3736440	3125180	3596940	4304520	3856420	5225020	4623260	3449790	3361180	3868370	9080860
ihf	putative	putative		657121000	680938000	739007000	610597000	912169000	484209000	979697000	498387000	681320000	604145000	705232000	702625000
ileS	ISOLEUCINE-TRNA	ISOLEUCINE-TRNA		1689820	3206410	3114960	4087170	3343660	3466420	3939390	3803550	4187400	3477780	4505420	9268120
ilvA	THREONINE	THREONINE		2888540	2373520	2704850	3376770	1784550	1967220	1698670	3239620	2064680	2498560	7801210	2669570
ilvB	ACETOLACTATE	ACETOLACTATE		3631960	3769710	5156370	6547960	2642020	3686020	5279370	9432500	3744180	4748780	5868280	7480490
ilvC	KETOL-ACID	KETOL-ACID		11652600	10669400	15259600	16248800	13313600	21003800	13589300	33557000	13542800	9779410	13366000	11031100
ilvD	DIHYDROXY-ACID	DIHYDROXY-ACID		3182960	3556510	4017760	4244240	2895390	4185650	5437840	7240040	3824310	4182090	5993140	5131750
ilvE	BRANCHED-CHAIN	BRANCHED-CHAIN		13316500	15875900	18975800	5543510	11755800	14335700	16571600	22403100	11985800	12404400	15584100	16472600
ilvN	ACETOHYDROXYACID	ACETOHYDROXYACID		19057800	21535700	14532800	45135600	12297100	12383000	23130600	16006400	12888600	16616100	14551600	31248800
impA	MYO-INOSITOL-1(OR	MYO-INOSITOL-1(OR				184694			36534.5	96879.5		75614.2	73666.7		66886.6
infA	TRANSLATION	TRANSLATION		87173600	46327300	61787000	121193000	118572000	127517000	63671200	196495000	68974200	35126400	51850700	35929300
infB	Translation	Translation		8146550	7246470	6610440	8528140	6672570	9627020	5145620	11537800	10079200	5575330	5080810	7477760
infC	TRANSLATION	TRANSLATION		18248800	21109600	16861400	20332600	15098300	19302100	20087000	26247300	20896200	20435100	19440000	18741500
iolB	enzyme	enzyme		10315300	14603100	14331500	28102100	10955300	11154600	12366900	21345900	8686190	9794500	14178000	7539240
iolC	sugar	sugar		1152770	411118	429991	515537	671567	1143960	413870	785928	534800	283578	985227	378706
iolD	PUTATIVE	PUTATIVE		866909	982818	1275310	1685530	863465	1061700	1231240	1421700	638298	679593	789990	635800
iolE	phosphate	phosphate		25682300	41158800	17778400	13525900	20629600	22041300	34908800	31152500	21325600	12180100	20213200	27399400
iolG	PUTATIVE	PUTATIVE		16399600	18668600	13764900	16228300	14878500	16940800	22072300	32770500	13551400	9661080	22654100	11999100
iolH	MYO-INOSITOL	MYO-INOSITOL		15371600	32056700	22737200	16533700	17286600	18127400	24106400	14803300	18176200	10193400	13799100	14287100
ispB	PUTATIVE	PUTATIVE		1009400	1116370	1264230	801578	1313550	680156	1695680	2004900	1125500	1053700	1123090	1224400
ispD	2-C-METHYL-D-ERYTHRITOL	2-C-METHYL-D-ERYTHRITOL		922838	371060	716336	611364	719477	732944	1554200	805292	614633	1358110	806338	511523
ispF	2-C-METHYL-D-ERYTHRITOL	2-C-METHYL-D-ERYTHRITOL		246097	274368	136757	234812	394894	384066		434430	437125	232270	250782	150688
ispG	involved	involved		997166	841410	692439	987590	658813	992752	805013	1609590	797723	1055840	1204520	1035910
iunH2	PUTATIVE	PUTATIVE		1808170	1560780	2597940	2707920	3233160	1908800	2788410	4014700	3197630	3442860	4928560	2875650
katA	CATALASE	CATALASE		194264000	162243000	207651000	188223000	170153000	212639000	173585000	221046000	168546000	141179000	172479000	133606000
ksgA	PUTATIVE	PUTATIVE		9346430	7077400	10112600	11150100	11002700	10178300	9084340	7442720	10059700	8653820	10320900	8428420
ldh	L-LACTATE	L-LACTATE		20529500	35871700	61301600	40946400	22589000	21328200	32500800	22157100	20338000	30833800	17156800	19111000
lepA	Membrane	Membrane		5014040	5052910	5531930	6105870	4499970	9355730	6458850	10576700	6775320	6018270	7434560	8233720
lepB	PROBABLE	PROBABLE		7710350	3360650	6604320	7425700	5459630	8054650	7823080	15546000	6823930	4856350	6013590	6088210
leuA	2-ISOPROPYLMALATE	2-ISOPROPYLMALATE		7293900	10863800	7797480	3597370	3262510	8120750	13205400	8070560	7053150	7867460	6588040	7625810
leuB	3-ISOPROPYLMALATE	3-ISOPROPYLMALATE		2191910	2902740	3894560	2650850	1532110	2193130	3347940	1729860	2157330	2364900	2098190	1203230
leuC	3-ISOPROPYLMALATE	3-ISOPROPYLMALATE		1291570	1647100	892619	1410950	1070500	1361190	1279880	2515940	1349080	1336870	1463320	789546
leuD	3-ISOPROPYLMALATE	3-ISOPROPYLMALATE		5125670	9568080	8411500	13036500	7132040	10321300	5270220	7806510	8736440	8627740	8211340	5902580
leuS	LEUCYL-TRNA	LEUCYL-TRNA		1684840	2623710	1466190	1873520	1598630	2405750	2435990	3079520	1538390	2281460	4389340	2741280
lexA	PUTATIVE	PUTATIVE		38611400	46636400	44233300	67799400	39711000	30951500	36264600	35659800	35613600	21356000	29839100	32648600
lgt	PUTATIVE	PUTATIVE		377615	1041970	442791	1177400	788950	1701150	1104110	2935500	653517	1756760	1925020	731337
ligA	DNA	DNA		3605950	3597600	4398950	3693160	4314460	2953750	2825770	2827260	3492630	3491600	4657680	3581300
lipA	LIPOIC	LIPOIC		1501920	2704880	1811950	3864810	5458590	2137720	3929810	4063170	3496860	3506990	5632810	3065240
lipB	LIPOATE-PROTEIN	LIPOATE-PROTEIN		1502320	678060	1479580	1884950	465074	825665	2263010	2295230	1180690	1136320	1334490	3344760
lldA	PUTATIVE	PUTATIVE		20198200	33804800	32887400	30624500	24005500	18201200	26034800	18740400	23142400	15295400	14183100	23062700
lpd	DIHYDROLIPOAMIDE	DIHYDROLIPOAMIDE		30216000	30687600	29326900	35769400	25749400	32279900	27790300	38912900	20482700	27324100	32818100	18753900
lpdA	DIHYDROLIPOAMIDE	DIHYDROLIPOAMIDE		4119730	5832920	2969510	2086760	3046430	8207080	3788050	13923300	5404630	3600790	7321980	4442200
lplA	LIPOATE-PROTEIN	LIPOATE-PROTEIN			771132	1215780	2485750			1606180					1088330
lppL	SECRETED	SECRETED		8644740	13372200	5954250	31198200	8241330	11483100	4935410	8154170	6344510	10795500	8629180	6726970
lppS	secreted	secreted		4105540	1722690	2764850	5407740	3772500	5470830	3041380	8423550	4128290	3294110	3211730	3069930
ltsA	glutamine-dependent	glutamine-dependent		2516060	4001810	2340470	1915780	3317040	3515580	3701940	6907560	2746410	3344610	4850040	4734950
lysA	DIAMINOPIMELATE	DIAMINOPIMELATE		4013810	4407750	7685950	10775500	6605330	8588360	8100730	19700300	10529800	9383280	8367220	14398500
lysC	ASPARTOKINASE	ASPARTOKINASE		5477250	5492710	3778940	5109220	4127620	5224360	4113970	9948780	5481880	3642200	5747180	4726520
lysG	TRANSCRIPTIONAL	TRANSCRIPTIONAL		20779.6		2211550		1501780					912958	1796440
lysS	LYSYL-TRNA	LYSYL-TRNA		12349600	8461000	6720270	7949540	9871100	9163720	11104200	14219200	8379200	7261790	11050800	13850300
lytB	Penicillin	Penicillin		9393950	9513170	11265100	35785400	17814800	12515500	8457980	21286200	9015610	7531710	13027000	15371400
maa	MALTOSE	MALTOSE		1742680	1123760	1746550	2517250	1150510	2780420	1291860	5274620	2198810	1503200	1439540	660204
mag	PUTATIVE	PUTATIVE		1764000	869069	855304	546013	887381	665444	653783	615576	1616330	487401	865373	1260070
malQ	4-ALPHA-GLUCANOTRANSFERASE	4-ALPHA-GLUCANOTRANSFERASE		5968690	6484530	7826990	6019670	5100680	7850100	7330780	12184600	7841340	6686430	11201900	10690000
manA	MANNOSE-6-PHOSPHATE	MANNOSE-6-PHOSPHATE		2609790	3351160	2326350	3247980	2388540	4524800	3063180	5546510	3385840	4046580	4093070	2451850
map1	METHIONINE	METHIONINE		3108400	6094800	5568060	9066200	5468630	4665970	5336340	4825330	3082680	5215000	5079760	2627860
map2	METHIONINE	METHIONINE		496284	225484	613341	110491	438017	84996.6	360467	84881.7	143639	508879	912220	336335
mcbR	TetR-type	TetR-type		588799	968547	1954010	1239140	990530	1708560	1051040	1324470	2183180	1987070	2323790	1154950
mcmA	METHYLMALONYL-COA	METHYLMALONYL-COA		11269700	10395100	4997410	5523410	8459230	8060540	12768400	15857100	8036830	4641530	5636230	10928500
mcmB	METHYLMALONYL-COA	METHYLMALONYL-COA		8300100	6845370	10747800	8645140	8082140	7068850	7429100	6661380	8490650	4440910	5343060	7404160
mdh	MALATE	MALATE		40358900	31203500	41456500	53488000	31742100	31600200	38701600	24433700	27334600	22673400	22127300	34085900
menB	DIHYDROXYNAPHTHONIC	DIHYDROXYNAPHTHONIC		747200	765660	988319	1527520	1060310	1113260	901748	1743400	472224	500000	1019300	724361
menC	similar	similar		1676860	1832040	861603	1359890	1907790	1731220	734966	2737500	920788	2784810	3622430	751593
menD	2-OXOGLUTARATE	2-OXOGLUTARATE			706346		724955		609150		2228920		674916	1551100	2770110
merA	PUTATIVE	PUTATIVE		441317	260937	299347	511265	356490	313279		708233	426256	355465	615822	571261
mesJ	ATPase	ATPase		289899	102483	301344			265594	213051			358424
metB	Cystathionine	Cystathionine		11453400	5511430	2264220	2962780	11218500	1937100	6792850	3136550	2289600	3466660	5619180	20034500
metE	Homocysteine	Homocysteine		1963610	744916	931757	1459800	1263580	2259200	1980450	3398410	1764310	3080830	4148570	3215650
metF	5,10-Methylenetetrahydrofolate	5,10-Methylenetetrahydrofolate		1752750	1195440	1937330	2484590	1258030	1180190	1131070	2094740	1911990	1875290	2227890	1638330
metH	Homocysteine	Homocysteine		149539	336111	161746	330043	216658	390624	188660	385295	201941	206462	410067	209021
metK	S-Adenosylmethionine	S-Adenosylmethionine		3750200	2501120	2033000	2246310	2888570	851388	7404650	2415610	1452860	3305750	5002500	4849120
metS	METHIONYL-TRNA	METHIONYL-TRNA		4146990	3519560	5461540	2528960	4811350	3763030	6440200	5001000	3373090	6469320	8776950	6076080
metX	Homoserine	Homoserine		484570	139483	175585		557708	524704	400647	735264	502893	453443	768979	837119
metY	O-Acetylhomoserine	O-Acetylhomoserine		14686500	10028300	17261900	18606300	19128000	10980500	24287300	17770500	15656300	21024600	38560300	44257500
mez	MALIC	MALIC		2738290	1804030	2229210	4024190	1910910	2301370	2734640	3708650	2816170	4866570	3698250	2268290
mfd	PUTATIVE	PUTATIVE		564583	311873	296992		470621	592558	352779	604258	406872	412371	804682	374198
mgtE1	Mg/Co/Ni	Mg/Co/Ni		290759	239149	330616	396894	188074	469335	516740	363181	343533	411318	299838	145193
miaA	TRNA	TRNA		1279710	1626760	2168670	381891	1758190	1385310	1442520	2461200	1479950	1427190	1809380	1361910
miaB	TRNA	TRNA		2419940	1863730	2703270	1796280	2382490	6088670	3617770	9006620	6088940	4136810	6991770	2738620
mmpL1	exporter	exporter		783594	765038	1301380	2575190	885414	1153250	3581700	1640120	735348	1538070	1222180	2201550
moaB	MOLYBDENUM	MOLYBDENUM		937337	2756560	1636450	2101000	988964	1288300	2519420	1157380	1258020	1726500	1505850	1001010
moaC	MOLYBDOPTERIN	MOLYBDOPTERIN		178388	167729	400318	407163	197970	113040	83326.5	195225	130450	93778.1	210459	126681
moaE	MOLYBDOPTERIN	MOLYBDOPTERIN			391425	547979			931717		189945		474371	468766	679224
mob	PUTATIVE	PUTATIVE		132266	47207.1	112422	268683	81437.4		176550	193375		76156.7	143042	79134.8
modA	MOLYBDATE-BINDING	MOLYBDATE-BINDING		10888900	2605300	3158650	4682000	9078200	12502400	1117390	5706170	4525000	1662170	3880340	3239280
moeA1	MOLYBDOPTERIN	MOLYBDOPTERIN		816446	861793	1305780	950068	591204	1276590	391618	1489750	815621	928158	878096	1822140
moeA2	MOLYBDENUM	MOLYBDENUM		752904	1359660	1264810	1484490	1224270	1569570	1577690	895725	540223	2031700	1602620	1993100
moeA3	MOLYBDOPTERIN	MOLYBDOPTERIN					344611
mog	PUTATIVE	PUTATIVE		2645530	1431480	3087170	2208920	1524160	2341450	2481530	1532110	1634110	932358	1317740	2168290
mqo	MALATE:QUINONE	MALATE:QUINONE		10072100	10628800	9307840	9903790	10454400	11410100	12370900	19794800	12374800	7874670	15383700	11457000
mraW	S-adenosylmethionine-dependent	S-adenosylmethionine-dependent		6312780	7890710	8206650	12133300	7388980	7603390	7841580	9831620	9271720	5597680	5629980	5225760
mrcB	membrane	membrane		3034310	2242690	4081500	2050830	2109140	5126440	6354880	3814290	4029680	2177130	2022860	2996140
mrp	ATPases	ATPases		7858050	3314220	5169830	4110360	4181830	3529000	4574610	3836780	4262500	4038150	5146130	3902450
mrpD	NADH-ubiquinone	NADH-ubiquinone		644812	496307	414300	1130920	420188	1191260	896643	1228140	1181920	585233	789442	310280
mrsA	PHOSPHOGLUCOSAMINE	PHOSPHOGLUCOSAMINE		24024000	30715800	26934900	32049100	24089000	19779500	23574600	23965300	18806500	19417500	20376900	29175100
mscL	LARGE	LARGE			167373	241217	0	0	0	0	0	0	0	0	0
msiK1	ABC-type	ABC-type		88128600	116709000	132140000	128197000	95697700	107627000	97854800	126675000	85150300	62857300	80414800	80402100
msiK2	ABC-type	ABC-type		2880440	1399370	2397360	1413840	3311600	2712500	1839600		1958630	1531320	1627790	1620210
msmA	PROBABLE	PROBABLE		25098900	30453400	12884200	5856040	21674400	12871000	18682100	6417790	3874950	6783110	21983000	13446000
msrA	PEPTIDE	PEPTIDE		634610	664552	645115	474056	498027	775390	673252	940887	564678	527828	838038	1044530
mtrA	Response	Response		91769.3	85444	179385	152439	165950		110441	198165		114636	155642	105292
mtrB	Signal	Signal			8548.92										18038.8
murA	UDP-N-ACETYLGLUCOSAMINE	UDP-N-ACETYLGLUCOSAMINE		12746400	1801670	10826500	3771470	5675520	6458380	6889880	14144500	6335690	6279390	6504390	3175610
murA2	UDP-N-ACETYLGLUCOSAMINE	UDP-N-ACETYLGLUCOSAMINE		1524760	1804400	3228230	1470780		905661	1841530	6884720	666316	4016810	3006180	1588470
murB	UDP-N-ACETYLENOLPYRUVOYLGLUCOSAMINE	UDP-N-ACETYLENOLPYRUVOYLGLUCOSAMINE		593232	344805	627654	472499	523858	494100	1106990	1165540	363686	1171920	663880	497814
murB2	PROBABLE	PROBABLE		293010	1699150	553477	495316	481619	793590	661134	1965480	1158580	514597	717340	1446140
murC	PROBABLE	PROBABLE		27962.4	49082.3	31946.8	38830.9	20565.6	40621.8	97344.2	130345	37487.8	37831.7	46701.7	75382.4
murD	UDP-N-ACETYLMURAMOYLALANINE	UDP-N-ACETYLMURAMOYLALANINE		1465680	2351390	2567440	2125430	1466650	1519780	1931000	1582110	1441280	571097	1492320	1333250
murE	PROBABLE	PROBABLE		4522640	4153360	5358740	4700790	3378480	4224490	3835660	5719710	3550790	3941310	4408540	4379660
murF	D-ALANINE:D-ALANINE-ADDING	D-ALANINE:D-ALANINE-ADDING		7011030	5140800	6551920	3151140	4225080	6976400	6134500	13759700	4710820	7577400	9549310	5935380
murG	peptidoglycan	peptidoglycan		2451530	1152330	1466330	1395640	986599	1666850	2039390	3279030	1888310	1028520	916724	1451520
murI	GLUTAMATE	GLUTAMATE		241979	511043	257045	1225220	190977	313760	178743	337421	284481	172929	325680	299042
mutM2	PROBABLE	PROBABLE		102518	97745.3	114006	210200	134039	187698	197850	185906	153483	69914.9	111611	285158
nadC	PUTATIVE	PUTATIVE		879957	643922	907768	1174480	1179940	961383	1819190	2869820	1039840	2816050	1934120	1807260
nadD	PUTATIVE	PUTATIVE		60400.6	50082.5	80062		47129	40514.1	108981		88467.2	58750.8	162181	91284.1
nadE	NAD-SYNTHETASE	NAD-SYNTHETASE		7459870	7753120	8788950	8960000	5095300	8740990	3644680	11481100	7634330	6560870	7432350	5497870
nagA2	BETA-N-ACETYLGLUCOSAMINIDASE	BETA-N-ACETYLGLUCOSAMINIDASE		15291200	5592620	6998440	7217540	7674090	16816500	4131920	3401460	15174700	5094230	6311630	2415370
nagB	N-ACETYLGLUCOSAMINE-6-PHOSPHATE	N-ACETYLGLUCOSAMINE-6-PHOSPHATE		10270600	6204960	5581380	11588000	9485380	8099120	7178670	11304900	10050100	5899940	10563600	13029300
nagD	PUTATIVE	PUTATIVE		3184190	1109910	2176930	313368	2389040	244237	1070980	388422	370829	950191	1825370	963397
nagI	PROBABLE	PROBABLE				1510130
nanA	N-ACETYLNEURAMINATE	N-ACETYLNEURAMINATE			43919.6	37143.9	0	0	0	0	0	0	0	0	0
narG	NITRATE	NITRATE		3129180	4501670	3545850	8111530	4253790	7158990	4489330	9859010	6277590	2974370	4044090	3651240
narH	PROBABLE	PROBABLE		33404600	21776500	26899300	14461200	23123600	12131200	20778400	36675200	15941700	18106700	29784000	19088100
narJ	NITRATE	NITRATE					554499
ndh	NADH	NADH		10016400	22702200	17577400	16448300	11657200	18333300	20076100	25587800	20173400	21439300	26279600	18055200
ndk	NUCLEOSIDE	NUCLEOSIDE		8375520	11450500	5654300	8268480	16759500	7003890	19134700	12878900	12645400	9485710	10504800	14262800
nifS1	PROBABLE	PROBABLE		467017	455406	588585	1397140	567506	478264	546394	799288	443912	946914	1527720	1181190
nifS2	CYSTEINE	CYSTEINE		4989300	3788720	5559070	5024300	4262940	4412250	6388500	6653150	3474010	5679260	8949630	7150720
nrdE	RIBONUCLEOSIDE-DIPHOSPHATE	RIBONUCLEOSIDE-DIPHOSPHATE		1079930	1540220	1629520	1056900	785234	1220950	2038900	2305240	1124220	5210360	7279570	5004930
nrdF	RIBONUCLEOSIDE-DIPHOSPHATE	RIBONUCLEOSIDE-DIPHOSPHATE		9717630	11603400	17313600	10294500	10855800	11111300	10869900	8534920	12669300	18212400	15414600	9411730
nrdH	PUTATIVE	PUTATIVE		28524400	11879400	14413000	23691700	24306100	22286100	14378600	59009200	19854800	13773700	18361800	15774700
nuc	Predicted	Predicted		2359990	883890	615397	2358310	6542690	6922240	397094	5615090	2504110	460934	2509670	437002
nusA	PUTATIVE	PUTATIVE		10489600	10763100	11950400	10468200	8362720	15248100	11285600	16112100	11451500	5837720	9241510	9098190
nusB	Transcription	Transcription		989016	2057540	2613300	3182590	2414220	1836760	1152180	1050520	2053250	2014760	3309730	2002520
nusG	TRANSCRIPTION	TRANSCRIPTION		16679100	30360500	10945600	26105500	16256500	18728700	24385400	27914100	20038600	12602500	13286900	26505600
odhA	2-OXOGLUTARATE	2-OXOGLUTARATE		29042400	33935800	35251000	32400900	28689400	32938700	34629600	54397100	26969200	35211800	51383200	44004500
ogt	METHYLATED-DNA--PROTEIN-CYSTEINE	METHYLATED-DNA--PROTEIN-CYSTEINE		526513	2337210	721259	1177580	1226090	718402	584526	2134010	1741270	342058	668752	740552
opcA	putative	putative		366050	614360	962527	365640	599326		743051	414036	420757	569853	791308	1030380
ornA	Oligoribonuclease	Oligoribonuclease		0	0	0	0	0	0	0	0	0	201539	232549	107099
otsB	TREHALOSE	TREHALOSE		14722800	8066510	11852700	5862660	12974700	6167700	9208130	7088890	5193980	14255600	15894300	8672810
oxyR	HYDROGEN	HYDROGEN		353040	296505	386024	0	0	0	0	0	0	433206	476160	564715
panC2	SIMILAR	SIMILAR		10599700	11282000	18315300	13047100	23278000	17864900	12201900	10671700	14678400	13062300	24736400	6088640
papA	PROLYL	PROLYL		19696700	21120000	18925900	11717600	8728910	12730400	9002070	22275800	13123100	18763200	31295800	28214300
parA1	ATPases	ATPases		3448470	3061360	2995710	4059410	3617410	3191220	4209570	5563850	2238100	2300580	3944920	3091650
parA2	PUTATIVE	PUTATIVE		183531	53375.4	105618	80804.5	108438	209388		253698	95744.4	100234	155702	80630.6
parB	Predicted	Predicted		8137000	10031500	9733090	5730590	6168540	6283650	9560950	5858190	9445880	6368070	6037210	9196470
pat	phenylalanine	phenylalanine		1740060	1937480	1757800	1452690	1900540	1460590	2821500	2667060	1965240	1787070	2306040	2205050
pbp	PENICILLIN-BINDING	PENICILLIN-BINDING		2340620	4618410	2016230	1960910	6703140	2833600	1381770	6999270	6157230	638375	1142190	919154
pbpA	D-ALANYL-D-ALANINE	D-ALANYL-D-ALANINE		1270860	1752100	3156460	1517750	2164200	2781590	1752700	3864000	1777420	574441	1030190	1111720
pcaF	PUTATIVE	PUTATIVE		97262.2	125792	73595.6	120681	90679.6	135165	311897	445232		61246.6	176987	44629.3
pcaG	PROTOCATECHUATE	PROTOCATECHUATE		6606990	5441480	4792080	25430500	7572630	7287040	5860900	9201860	5794040	2047170	2724020	3479710
pcaH	PROTOCATECHUATE	PROTOCATECHUATE		497616	681398	1579580	953800	581378	1804980	1054650	979195	505863	651415	540761	785584
pcaI	3-OXOADIPATE	3-OXOADIPATE		1102660	393312	2255210	2763610	1163300	2657850	1732390	1874660	818144	1316110	1193080	368496
pcaL	3-OXOADIPATE	3-OXOADIPATE		423408	175482	1073620	759158	462342	511208	688207	890000	683866	719256	588532	546311
pcaR	Bacterial	Bacterial		327898	2563930	513421	1491050	514710	329618	307492	342172	301916	421360	456521
pccB	PROPIONYL-COA	PROPIONYL-COA		1206560	760824	821754	755928	367619	2035320	1106010	927694	1210280	675252	1054030	979987
pck	PROBABLE	PROBABLE		7359470	8727330	6512440	14212200	4667110	9877820	6438520	8135160	6318160	4087200	6195070	7399230
pcnA	POLYA	POLYA		871748	2250350	2643900	1313830	1631600	1193770	2264470	1971370	1130460	1418560	1667980	1318480
pcrA	ATP-DEPENDENT	ATP-DEPENDENT		1546770	1396290	1334510	1595900	1227120	1614900	1133880	1875210	1304630	1372650	1339890	1461630
pctB	ABC-type	ABC-type								3130.42
pduO	ADENOSYLCOBALAMIN-DEPENDENT	ADENOSYLCOBALAMIN-DEPENDENT		10102300	5214600	9545420	11552200	8222020	13239400	0	0	0	17970600	10821300	19045600
pdxR	pyridoxine	pyridoxine		0	0	0	0	0	0	0	0	0	148243	444920	316899
pepB	LEUCINE	LEUCINE		28076100	25641200	33794800	44766900	27673200	28528700	32935100	32385400	26081000	20880300	21901800	20291700
pepC	Aspartyl	Aspartyl		24906500	34041600	20100600	22419500	26218300	26090300	19242200	18546300	21865200	19933100	19612600	26308400
pepE	PROLINE	PROLINE		58417.1	34730.7	30213.1				36871.1				35449.4	41710.1
pepN	AMINOPEPTIDASE	AMINOPEPTIDASE		4642910	5402830	4889510	3855360	4290580	3869940	4217640	5367910	3024480	3568090	5556930	5127800
pepO	ENDOPEPTIDASE	ENDOPEPTIDASE		11416900	11060300	15536100	13259900	10014700	12690200	16545800	13766500	14309000	10173100	12586000	16005600
pepQ	XAA-PRO	XAA-PRO		16150900	15583300	16238400	12844500	13828800	12016200	12876600	17436400	9269630	6205840	11284800	13246900
pfkA	6-PHOSPHOFRUCTOKINASE	6-PHOSPHOFRUCTOKINASE		1863510	2968550	2717850	1682510	1762180	2440100	2535410	4095880	1891400	2265160	3441220	3717820
pfkB	1-PHOSPHOFRUCTOKINASE	1-PHOSPHOFRUCTOKINASE		3402970	1225850	4070600	4951960	932109	1918480	2675680	2538160	1951650	2801440	3938940	2327100
pgi	GLUCOSE-6-PHOSPHATE	GLUCOSE-6-PHOSPHATE		14901500	32937100	20108500	18885800	15057400	10470200	15414300	8322370	11284100	6739350	10127300	10900600
pgk	PHOSPHOGLYCERATE	PHOSPHOGLYCERATE		102109000	74204900	88259500	94654200	56489000	89132700	61817000	67780600	73742800	70727900	96527300	86295900
pgm	PHOSPHOGLUCOMUTASE	PHOSPHOGLUCOMUTASE		85398900	74949600	102094000	92625800	52496800	98131400	43973100	65189000	86100400	45461400	84251300	45043200
pheA	PREPHENATE	PREPHENATE		6233700	6240970	7172510	5670460	7722490	8573190	5022230	5278620	6150700	4207820	4923120	5439290
pheS	PHENYLALANYL-TRNA	PHENYLALANYL-TRNA		1137730	1807220	2260450	1564700	1060490	2152180	2128810	2345230	1947570	1714460	1663360	1806260
pheT	PHENYLALANYL-TRNA	PHENYLALANYL-TRNA		4446090	3910600	7206850	4674670	3879380	9915480	7023900	7774810	5321270	7172850	8657860	6898520
phnA	Uncharacterized	Uncharacterized		2999780	2254250	708889	1987780	2802380	1577280	6110430	3001930	1197310	391271	890966	2888940
phnB1	UNCHARACTERIZED	UNCHARACTERIZED		111106000	60386000	39286800	87453300	59970000	173693000	23170100	135926000	78642400	18028400	21096600	69829700
phnB2	similarity	similarity		116569		44607.4		57301.5		0	0	0	25074.1	35569.6
phoD	SECRETED	SECRETED		1667700	773125	3111220	19515700	3124460	4863410	3596250	1745890	4090210	926988	468639	697638
phoH2	Phosphate	Phosphate		2322270	1978730	4666280	1226460	2163090	4528950	1886970	2527480	3559670	3356410	3845300	1938280
phoU	Putative	Putative		410666	614355	167937	471350	151197	418759	540266	444745	345196	140417		700132
phr	DEOXYRIBODIPYRIMIDINE	DEOXYRIBODIPYRIMIDINE		1013860	1418110	855387	0	0	0	0	0	0	1126730	386564	1226030
pimT	SAM-dependent	SAM-dependent		5704880	5456260	9420240	8448100	5646070	8647450	6728680	10513100	5809100	14692200	8873230	6338080
pknA	SERINE/THREONINE	SERINE/THREONINE		668653	363287	525026	0	0	0	0	0	0	506886	572982	472252
pknE	putative	putative		892704	168682	373046	462209	324416	1993520	183776	1052930	1313570	456785	338510	186524
pknG	Serine/threonine	Serine/threonine		389985	103131	147568		108321	95810.3	131415		231013	260859	217400	87031.6
pknL	PUTATIVE	PUTATIVE		1201600	623440	591824	1294990	924313	1025520	1010440	1896690	927569	569540	561498	749408
pks	POLYKETIDE	POLYKETIDE		2899890	2901300	3086700	3817290	1904510	4514370	4133760	6317510	3049900	5015400	6928730	6991040
plsC	1-ACYL-SN-GLYCEROL-3-PHOSPHATE	1-ACYL-SN-GLYCEROL-3-PHOSPHATE		2207600	1848860	3335860	1225090	1921600	2756370	4533670	2861900	2059140	1860440	1916850	2639300
pmmA	PHOSPHOMANNOMUTASE	PHOSPHOMANNOMUTASE		1549150	1247240	2473450	2195300	2066070	1793370	4140000	4561600	5294340	2061120	2947850	2150100
pmmB	PHOSPHOGLUCOMUTASE/PHOSPHOMANNOMUTASE	PHOSPHOGLUCOMUTASE/PHOSPHOMANNOMUTASE		629756	465180	469678	856804	566994	631334	1343420	1291350	649022	659657	631533	635704
pncA	NICOTINAMIDASE/	NICOTINAMIDASE/		2077950	3003830	5031740	19482300	3761540	8700890	2747130	7161910	4295280	1349480	2132240	2526680
pobB	4-HYDROXYBENZOATE	4-HYDROXYBENZOATE		1649800	872624	999334	831432	1529320		0	0	0	1571940	1829610	1292110
polA	DNA	DNA		2786870	3134220	1692500	2032040	2576240	2577380	2171750	2850580	3218820	1817450	2403270	3422330
ponA	PENICILLIN-BINDING	PENICILLIN-BINDING		3637020	2325660	1006580	2253080	2718180	3695530	1273060	3041180	1742290	931617	4610160	1748670
porC	putative	putative		8661980	1902430	423436	1552190	14334700	5547400	4453170	11844900	5383200	3081830	7694050	3892330
poxB	PYRUVATE	PYRUVATE		1101120	1242170	956484	1338640	1393220	816602	1472400	1682670	948426	585507	999817	1100020
ppa	INORGANIC	INORGANIC		138277000	124160000	128974000	274148000	228558000	125423000	180696000	219776000	103518000	70001600	131962000	141949000
ppc	PHOSPHOENOLPYRUVATE	PHOSPHOENOLPYRUVATE		1858460	1715320	1841880	2194140	1315060	1552770	2062600	2082100	1311370	1563160	2716810	2229490
ppgK	POLYPHOSPHATE	POLYPHOSPHATE		50603000	42929000	45849300	48884100	40952900	42387200	38363600	46944800	38847900	35629000	28998700	32347700
ppiA	PEPTIDYL-PROLYL	PEPTIDYL-PROLYL		5668010000	2179580000	2260660000	4707530000	5879110000	5343190000	3043640000	3351280000	3658750000	1163480000	1534600000	2694610000
ppiB	PEPTIDYL-PROLYL	PEPTIDYL-PROLYL			2483970		2658120			3663930					1649210
ppmC	polyprenol-phosphate-mannose	polyprenol-phosphate-mannose		500838	1375890	666861	894593	881223	1005300	0	0	0	504818	411756	864822
ppnK	POLY(P)/ATP-NAD	POLY(P)/ATP-NAD		8448700	6513810	10969900	5555810	4660150	9934320	8965900	5761120	9598680	6596810	4697870	3278200
pptA	PHOSPHOPANTHETEINYL	PHOSPHOPANTHETEINYL		44732000	27387100	37512200	34465400	39656500	73996900	29802500	74154700	47587100	27865600	35259200	14544300
ppx1	EXOPOLYPHOSPHATASE	EXOPOLYPHOSPHATASE		2588400	2046070	1003190	1301430	1380490	2254970	774451	1099210	2100470	1285790	1501440	1523110
ppx2	EXOPOLYPHOSPHATASE	EXOPOLYPHOSPHATASE		2146890	2217480	2340020	3021000	1918540	3480950	2193270	4322270	3042000	1913430	3156760	1079650
prfA	PEPTIDE	PEPTIDE		12131900	9708730	6880650	8085680	13569400	8667220	16681800	10496000	9114500	7503310	8885800	13697800
prfB	PEPTIDE	PEPTIDE		1799570	1433850	2901120	1839550	773987	1691720	1458070	1894140	1849820	1810730	2461040	2137530
prfC	PUTATIVE	PUTATIVE		821321	2781020	1644180	1350990	1092730	1739460	3133180	4434520	2055350	2081890	2799770	3229790
priA	Primosomal	Primosomal			839888	1359210	0	0	0	0	0	0	0	0	0
proA	GAMMA-GLUTAMYL	GAMMA-GLUTAMYL		17545200	13820900	17775000	22531400	14757500	16449900	17140000	26611300	13418500	13008100	19632400	17365200
proB	GLUTAMATE	GLUTAMATE		2934280	4178730	3703640	1860740	1547440	2415060	2916130	1485120	3008010	2218490	2185170	2565180
proC	PYRROLINE-5-CARBOXYLATE	PYRROLINE-5-CARBOXYLATE		3643830	2473720	3954810	5425430	3415080	10235700	5337050	7043990	5088660	5289080	6673730	2526110
proS	PROBABLE	PROBABLE		10150000	9964630	11804400	7515380	8093930	10104600	11697700	11411400	8846480	16598000	22830600	11700200
prpB1	PROBABLE	PROBABLE		663941	1438550	736250	598567	436818	1543280	444808	926384	610945	425414	663487	202976
prpB2	PROBABLE	PROBABLE		4602140	8450560	7643850	8901990	7329170	16336700	5617200	12979100	5220110	4577690	10951700	4283110
prpC1	(METHYL)CITRATE	(METHYL)CITRATE		1429660	1747570	2115980	789390	1083280	1106580	1496540	1920220	859525	803966	1359000	929149
prpC2	METHYLCITRATE	METHYLCITRATE		2655070	3484590	4301120	2282640	1513600	2663570	1978340	2175020	1372460	2276190	2532010	2120120
prpD1	PROPIONATE	PROPIONATE		2528900	1549820	1087570	3165880	718679	4022190	2177820	2455090	3294400	473693	705041	1675080
prpD2	PROPIONATE	PROPIONATE		16095600	42854100	15640200	11407800	16157800	29983600	17373200	29044800	12632100	14939600	26753800	11992400
prsA	PHOSPHORIBOSYL	PHOSPHORIBOSYL		9102160	16596100	11883900	4784290	7550770	11605600	24487700	11664500	5963090	9076030	12710100	24878000
psp4	Putative	Putative		1648980	796211	1508010	3900710	3035060	2238640	1674270	7061980	3043520	1522880	3380720	2005560
psp5	Putative	Putative		4562980	3013740	1761870	4081360	3880660	5097580	1417750	8292890	5188820	961333	1792470	2456900
pstB	ABC-type	ABC-type		98532.5	402230	259954	283339	697529	91565.2	62673.4	345992		387361		184523
pstS	ABC-type	ABC-type		318481	224974	414040	443997	534588	439646	463092	1534680	453611	215103	245706	199113
pta	PHOSPHATE	PHOSPHATE		965090	1458080	1333220	2612170	2123220	2435600	1341580	2472780	2209890	640242	1742930	856995
pth1	PROBABLE	PROBABLE		4690470	2250440	2590880	5339810	1467680	3296680	2036390	5065020	3712750	2669790	2300380	4569580
pth2	PEPTIDYL-TRNA	PEPTIDYL-TRNA		4796640	6035980	3004470	3212570	6887010	2665270	10768700	1458820	2999710	5437600	6417740	6426360
ptpA	PROTEIN-TYROSINE-PHOSPHATASE	PROTEIN-TYROSINE-PHOSPHATASE		0	0	0	0	0	0	0	0	0	3449630	4260510	3273820
ptpA2	Low	Low		1808870	1192250	1575790	1395260	1267050	1484650	1166470	2208420	1173810	1219450	1780410	1157320
ptrB	PROLYL	PROLYL		1296460	1374550	1921450	1531670	1777740	1860130	3075100	2716580	938096	3008850	3156650	3411520
ptsF	SUGAR	SUGAR		1955540	2859310	1038060	4451550	3380920	3484660	4845280	3621140	3452700	1504030	2326860	3170260
ptsG	GLUCOSE-SPECIFIC	GLUCOSE-SPECIFIC		27068600	37295600	4182800	4765920	34546300	13317300	76016500	12435200	17576400	11125900	20870400	40603700
ptsH	PHOSPHOCARRIER	PHOSPHOCARRIER		1269220000	836119000	410461000	724929000	1355850000	1537910000	966539000	1515970000	935847000	523596000	887110000	478064000
ptsI	PHOSPHOENOLPYRUVATE:SUGAR	PHOSPHOENOLPYRUVATE:SUGAR		3704190	3429620	4633480	4647700	4378860	4433840	4901050	8763850	3822620	4349990	6096730	4818340
purA	ADENYLOSUCCINATE	ADENYLOSUCCINATE		6438990	5087200	8349940	8271070	7254690	10113100	5724200	11469900	7443670	5758480	10142900	6121940
purB	ADENYLOSUCCINATE	ADENYLOSUCCINATE		18196300	19519500	23007600	24444100	18072900	15086700	20334800	19157500	16670400	17644400	30449100	22553600
purC	PHOSPHORIBOSYLAMINOIMIDAZOLE-SUCCINOCARBOXAMIDE	PHOSPHORIBOSYLAMINOIMIDAZOLE-SUCCINOCARBOXAMIDE		4110850	4555700	3705150	3980870	4178540	3567860	5070550	7025640	4186510	5556170	7066680	5703750
purD	PHOSPHORIBOSYLAMINE-GLYCINE	PHOSPHORIBOSYLAMINE-GLYCINE		19642200	14687000	15858600	16798300	14562900	24179100	14192800	33404500	18312400	26247500	36211400	30177900
purE	PHOSPHORIBOSYLAMINOIMIDAZOLE	PHOSPHORIBOSYLAMINOIMIDAZOLE		300915	262633	580223	295529	195710		622482	1382840	548036	289129	308973	739086
purF	AMIDOPHOSPHORIBOSYLTRANSFERASE	AMIDOPHOSPHORIBOSYLTRANSFERASE		1574380	774833	1422560	1530640	856002	1012880	2793330	2074190	810131	2422440	3025200	1075070
purH	5'-PHOSPHORIBOSYL-5-AMINOIMIDAZOLE-4-	5'-PHOSPHORIBOSYL-5-AMINOIMIDAZOLE-4-		3579070	3728330	4518260	3907640	3351740	5048880	4501640	8033460	3268210	6613400	8570300	5221300
purK	PHOSPHORIBOSYLAMINOIMIDAZOLE	PHOSPHORIBOSYLAMINOIMIDAZOLE		133202	89152	68423.6	133975	186800	259839	264324	275193	225469	141954	156590	275966
purL	PHOSPHORIBOSYLFORMYLGLYCINAMIDINE	PHOSPHORIBOSYLFORMYLGLYCINAMIDINE		6842240	6706730	10410700	6399470	3746850	8585190	9246790	19032800	4568710	13485000	19793500	14505700
purM	PHOSPHORIBOSYL	PHOSPHORIBOSYL		18534100	18347800	32421900	25900700	19399900	18699500	36077400	32139500	15586300	31672400	45768700	38210400
purN	5'-PHOSPHORIBOSYLGLYCINAMIDE	5'-PHOSPHORIBOSYLGLYCINAMIDE		7042160	5839960	4189260	7886780	5528850	6284220	5814680	9989880	5211330	6466430	6570880	6897540
purQ	PHOSPHORIBOSYLFORMYL	PHOSPHORIBOSYLFORMYL		21827700	14357200	28562900	16486100	14480100	22148100	12839900	17882200	18657600	31630000	43185500	14511300
purS	PHOSPHORIBOSYLFORMYLGLYCINAMIDINE	PHOSPHORIBOSYLFORMYLGLYCINAMIDINE		1231760000	465734000	495154000	1168230000	1897350000	1169200000	837083000	2712500000	997101000	496446000	967253000	610445000
purT	PHOSPHORIBOSYLGLYCINAMIDE	PHOSPHORIBOSYLGLYCINAMIDE		447366	583723	997006	537518	385776	397848	547989	456523	448408	394365	524849	648183
purU	PROBABLE	PROBABLE		505911	715590	881632	581860	495519	1227010	1840310	1580500	1403140	990105	1554920	2062270
putA	PROLINE	PROLINE		6369740	7290830	7081070	5288780	5555720	5572110	6853920	11769000	5189490	3668810	4540070	4046140
pvdS1	RNA	RNA		6353570	6870180	7552980	5642480	5529610	7280830	3086640	4772140	6615680	3222920	3414040	5975850
pvdS2	RNA	RNA		2922300	3778070	3784600	5471240	3075990	4222670	4770170	3876990	4467420	2935070	4116070	4024190
pyc	PYRUVATE	PYRUVATE		3784640	5722960	5201010	4707040	2913510	8567890	4123330	7137190	5577030	4527470	6309270	5959370
pyk	PYRUVATE	PYRUVATE		63759800	64148400	40219700	33371800	41907900	36491200	79822300	74235900	35867400	43095900	47696200	81992700
pyrB	ASPARTATE	ASPARTATE		1406140	2115360	2805560	1797450	1711780	1002750	1804550	1403670	1121070	1763110	2008090	1679280
pyrC	PUTATIVE	PUTATIVE		3457510	1531810	7220880	2017530	1595090	3926530	2288190	5815280	1914580	3263930	2931560	886826
pyrD	DIHYDROOROTATE	DIHYDROOROTATE		10206600	11381600	13213300	15408100	11709000	15326200	15456200	9612720	12808200	8575640	10955900	12040900
pyrE	OROTATE	OROTATE		33555500	61880800	46101500	32683800	23861600	37849600	60050200	40926900	36010500	30894900	35498200	45148200
pyrF	Orotidine-5'-phosphate	Orotidine-5'-phosphate		5445860	4261630	3197520	5295680	4158320	6865580	3349680	5699720	4162860	2139660	3550480	3289860
pyrG	CTP	CTP		634578	1063280	292533	0	0	0	349952	1382360	346511	1065900	1537760	420355
pyrH	UMP-KINASE	UMP-KINASE		16980800	18928100	17237400	7343540	16896400	22311100	19939500	30366300	21661200	15548200	29587300	16883000
pyrR	Pyrimidine	Pyrimidine		42084700	40313900	35395100	39665200	39671600	32565400	39921100	28447800	30123700	19267500	25093300	29424200
qcrA1	RIESKE	RIESKE		5585290	2540430	2894300	3312240	3706950	7224210	3940100	5154620	4093870	4955010	4550150	3774080
qcrA2	RIESKE	RIESKE		761163	1026050	673025	276298		873750	1408160	1167580	641503	3786300	1584760	595663
qcrB	CYTOCHROME	CYTOCHROME		12127300	8836960	7710250	10352700	10101600	12867600	9137520	19489300	7905490	8347200	10568200	11719900
qcrC	CYTOCHROME	CYTOCHROME		1485810	903536	778776	1277670	847322		1910320	1655240		644936	684851
qor	PROBABLE	PROBABLE		7673500	7829310	8735660	6438110	6741260	12972200	4627990	15403800	6867210	2256330	2766050	4243490
radA	PROBABLE	PROBABLE		397934	1370330	228412	298826	166286	137450	499748		143438	186263	239182	253908
rbfA	Ribosome-binding	Ribosome-binding		99952500	96956900	72755200	116221000	126306000	108366000	86830900	104248000	112635000	62105700	74092800	109462000
rbsK1	PUTATIVE	PUTATIVE		10213800	10486800	17112900	14772400	13654900	10922800	9722010	18935300	12586300	5967350	7921320	10180800
rbsK2	PROBABLE	PROBABLE		2776230	618752	403258	581440			403106		198790	244490	401275	388652
recA	DNA	DNA		2495650	4796010	4817480	5606630	2331950	4130860	6744790	5999020	4193150	5746380	3841820	3364950
recF	DNA	DNA		1766130	1287300	840602	481692	896976	1925660	718116		1810160	1489740	1097350	789489
recN	DNA	DNA													33477.3
recR	DNA	DNA		5642680	7399510	8452180	3173420	10125800	9003230	11239000	3835400	10376100	8073450	14418700	11375300
recX	regulatory	regulatory		2339040	1431750	1405230	1349630	1661470	2989290	3677450	4101520	4066960	3206990	2421110	2367180
rel	PPGPP	PPGPP		805374	1021550	818999	735982	575261	975066	1056620	988392	933233	870989	965515	760620
rhlE	PROBABLE	PROBABLE		2318230	2505800	3830170	3375140	2721360	3578090	2957190	2710240	4194840	1840320	1909370	1722230
rho	Transcription	Transcription		10187700	14649100	12216600	12590000	12793300	11466300	15103400	13752800	12806900	10976800	9878580	13013300
ribA	PUTATIVE	PUTATIVE		9402800	1107990	1111090	1387940	4019040	1775310	3733520	3709950	2616690	1861470	1573350	1367550
ribC	PUTATIVE	PUTATIVE		3825340	2181620	5425960	3818780	2051620	2695370	5307300	3028160	5926410	1996090	1220910	846844
ribD	RIBOFLAVIN	RIBOFLAVIN		229269	189761	526744	606119	198010	197497	340879	293839		283336	198841	594459
ribF	PUTATIVE	PUTATIVE		124420	126674	111235		104895	278656	127701	91888.7	118577	56802.5	56206.5	220822
ribG	PUTATIVE	PUTATIVE		659307	724993	349558	428864	586356	626929	567282	1340090	590525	415335	598198	351916
ribH	RIBOFLAVIN	RIBOFLAVIN		5525460	7270250	3281840	5387700	7769840	5029280	10064400	5500410	4099820	3913830	6074140	6884300
ribX	putative	putative		857688	671130	719783	1378220	1051330	1498850	658620			1716800	1194810	1974000
rimM	RIMM	RIMM		8418830	7593630	6520100	6319430	11047700	10701700	10647100	5992090	10563100	5647440	11498900	9050710
rluC2	Putative	Putative		2446900	4119220	2773640	3004460	4038380	5355120	4650370	3852010	5241400	2682210	4254360	4317370
rluD	RIBOSOMAL	RIBOSOMAL		3185050	1193940	1708010	1287150	2020180	5547270	1111830	4853210	3397680	2539410	2679460	1984790
rmlA1	TDP-GLUCOSE	TDP-GLUCOSE		667520	931196	2090160	0	0	0	989973		951870	1160290	1454900	2227070
rmlA2	GDP-MANNOSE	GDP-MANNOSE		12993800	17587600	12172700	18763400	9280170	20253000	11575500	23574700	11333400	20177200	20831900	14212500
rmlB1	DTDP-GLUCOSE	DTDP-GLUCOSE		283755	388822	274137	0	0	0	0	0	0	253195	413922	460974
rmlB2	PUTATIVE	PUTATIVE		6091280	5369220	9896430	5015160	4993810	10464600	4733840	5871520	5816980	4660070	6324400	6032750
rmlCD	DTDP-4-DEHYDRORHAMNOSE	DTDP-4-DEHYDRORHAMNOSE		20153700	13943800	13946700	16616100	14923000	15403400	11325400	19104900	12106400	14093200	15929900	12298400
rmpA	putative	putative		4197450	3368940	1838280	3901780	1960610	4081830	2331110	4212550	2672340	1328700	1793010	1899080
rmpC	putative	putative		3632380	4209320	3400240	5772840	7233790	5142960	6891400	10619300	4341640	3342250	8718430	3223440
rnc	RIBONUCLEASE	RIBONUCLEASE		17526400	13724000	12844700	13985000	12216800	12260600	11956600	7007040	9892220	11493600	14256300	14852500
rnd	PROBABLE	PROBABLE		3189160	2623420	2276160	2015140	1688480	1460240	1826150	1355630	1705440	980131	1296930	1744570
rne	PROBABLE	PROBABLE		18415400	12887400	19067200	16208700	21622600	18328400	15350800	14093900	21371000	9341930	12146500	12378000
rpe	RIBULOSE-5-PHOSPHATE-3-EPIMERASE	RIBULOSE-5-PHOSPHATE-3-EPIMERASE		3141030	2785110	2038010	2682840	2764740	1602970	2855070	4066510	2414020	1602940	1816610	2357080
rph	PROBABLE	PROBABLE			259538	728990	1423630	353316	500070	415496	519522	278185	283852	426755	313654
rpi	POSSIBLE	POSSIBLE		27288600	17240500	15703100	37408500	55822800	32890300	24497600	32562400	24869000	13409500	21611400	12276300
rplA	50S	50S		805082000	931204000	675932000	760897000	967325000	614210000	989147000	711001000	822671000	876413000	947022000	1017590000
rplB	50S	50S		113621000	175629000	159325000	172430000	134238000	113348000	359442000	164737000	133499000	274077000	185588000	195787000
rplC	50S	50S		217662000	161501000	200865000	145229000	168090000	261741000	209977000	275885000	251949000	202365000	227057000	229285000
rplD	50S	50S		124052000	181310000	193669000	270217000	166406000	146420000	269189000	186998000	181950000	246717000	202747000	164505000
rplE	50S	50S		1069540000	1173160000	1021500000	998320000	1553200000	1096730000	1466350000	965440000	1077870000	980178000	996899000	940930000
rplF	50S	50S		107347000	181414000	155851000	127127000	107469000	154097000	158614000	109190000	132680000	141888000	141388000	133866000
rplI	50S	50S		433340000	317082000	409921000	348078000	280549000	364789000	632036000	616213000	614570000	347347000	327990000	365349000
rplJ	50S	50S		490748000	459130000	661718000	630301000	490660000	460867000	746492000	574897000	617826000	626425000	609493000	523313000
rplK	50S	50S		24979100	33130200	36009800	38085800	42251100	31337300	65135400	93929300	58439200	41710900	44948900	35786500
rplL	PROBABLE	PROBABLE		1565340000	1396050000	1232200000	2402280000	2413890000	1990090000	2895750000	2569530000	1948940000	1203360000	1344490000	1568710000
rplM	RIBOSOMAL	RIBOSOMAL		76289100	59551900	57618800	83788600	49154200	53222200	71791800	62726000	40294800	67273300	76447300	67441600
rplN	50S	50S		78150500	78198300	75153200	76317600	61782700	60404400	108977000	95789900	76374700	64569800	74153200	82208300
rplO	RIBOSOMAL	RIBOSOMAL		217176000	101641000	139125000	183857000	195576000	181927000	274857000	145219000	280801000	208278000	178305000	167988000
rplP	50S	50S		68504500	67451500	74160400	61116700	80068700	51925000	121367000	98240000	65636000	72779300	90228400	73539300
rplQ	50S	50S		322576000	252722000	210566000	254345000	382843000	264830000	413822000	349879000	340336000	299451000	274442000	350724000
rplR	50S	50S		730732000	939531000	663462000	1326050000	1198000000	864289000	1495410000	840569000	1173450000	1004670000	778956000	733890000
rplS	50S	50S		50945600	71613300	75427600	60743800	45558000	40422500	84994100	43724600	54669700	69172900	56930800	69021600
rplT	50S	50S		75491200	104144000	75408600	47341300	107760000	49755300	109452000	81853700	115246000	89629500	121902000	61889800
rplU	RIBOSOMAL	RIBOSOMAL		21194000	21328900	18817400	47603900	18664100	25552600	22294300	20585200	26329000	19252800	14201800	32635100
rplV	RIBOSOMAL	RIBOSOMAL		302695000	434214000	381260000	441373000	439639000	349762000	826646000	425705000	527680000	401319000	432000000	502575000
rplW	50S	50S		558596000	434102000	397058000	719768000	272065000	511975000	387258000	239826000	514902000	399874000	365726000	734907000
rplX	50S	50S		688266000	349748000	459920000	921961000	1086390000	765291000	782110000	1273930000	785976000	416099000	438263000	478246000
rplY	Ribosomal	Ribosomal		172789000	174973000	160778000	151781000	128783000	99887800	195847000	140877000	97223100	127352000	142935000	203165000
rpmA	50S	50S		2297880000	1596660000	1368580000	2317520000	3178640000	3108740000	1627180000	3685440000	1885800000	1283810000	1817630000	1447910000
rpmB	50S	50S		12616000	9158820	10175600	15329000	15343100	7442550	27495900	18948800	9318470	11846200	13203300	9558340
rpmC	50S	50S		858371000	701922000	481484000	773459000	867383000	802111000	661791000	822349000	709173000	676607000	675476000	610090000
rpmD	50S	50S		240958000	518820000	196213000	398129000	542096000	285723000	394694000	272938000	184285000	296041000	278241000	290535000
rpmE	PROBABLE	PROBABLE		320539000	151424000	123332000	406801000	649668000	357152000	167021000	594772000	278822000	164468000	228883000	210077000
rpmF	Ribosomal	Ribosomal		8850770000	3536290000	3110990000	11395500000	12240000000	13560100000	3650180000	18873600000	9647440000	3405670000	8886030000	5012870000
rpmG	50S	50S		829418000	342288000	291916000	1505870000	1516700000	1043140000	500228000	2503130000	1027530000	397043000	655375000	528043000
rpmH	50S	50S		2583870	3356920	136143	2379740	3915370	3429660	2900080	3412360	6940910			2418720
rpmI	50S	50S		71802800	31380400	56310700	86572100	97529800	66447100	67868100	183552000	75578300	62911000	56185200	45680700
rpoA	DNA-DIRECTED	DNA-DIRECTED		14846600	16819600	14082300	25746800	14455100	13351200	17735400	14945200	14705400	14736400	19641500	15454700
rpoB	DNA-DIRECTED	DNA-DIRECTED		75098800	81949400	87173200	93952800	59535400	116087000	125371000	159721000	97969100	105011000	97204400	85747400
rpoC	DNA-DIRECTED	DNA-DIRECTED		15529300	16842500	18464400	13154500	13191200	25775400	30559700	41437600	19250900	28504200	43374700	31344000
rpsA	30S	30S		310347000	509270000	600052000	470369000	425063000	363500000	639904000	382932000	463215000	467207000	502836000	528698000
rpsB	30S	30S		72308200	91628500	148056000	94758600	83598100	112567000	168279000	161465000	138944000	108488000	148954000	96740800
rpsC	30S	30S		83079100	118336000	147586000	96075200	97290500	134668000	169343000	303399000	147544000	195888000	149956000	101221000
rpsD	RIBOSOMAL	RIBOSOMAL		477121000	740912000	736159000	658633000	568584000	407210000	808381000	554305000	504788000	484425000	485187000	786958000
rpsE	30S	30S		60505400	76637700	99072900	85907600	73559400	64789900	129677000	145262000	80413200	105566000	117343000	85211000
rpsF	RIBOSOMAL	RIBOSOMAL		212488000	180653000	225718000	280733000	221374000	205492000	160339000	226101000	177240000	213754000	248393000	190577000
rpsG	30S	30S		124470000	105229000	89661000	108857000	86124900	100137000	209735000	112043000	101551000	156099000	136206000	116237000
rpsH	RIBOSOMAL	RIBOSOMAL		70158600	77055500	108424000	97425300	58971300	62846400	122997000	66315000	78964200	88678600	102212000	86196500
rpsI	30S	30S		12747800	15683100	20873700	10526200	17957700	19430300	44114400	28214900	24470700	19862500	29425400	15756800
rpsJ	RIBOSOMAL	RIBOSOMAL		1078650000	1195270000	1013130000	1096330000	1367390000	1142960000	1745860000	1180840000	1157630000	1515240000	1501950000	1471820000
rpsK	RIBOSOMAL	RIBOSOMAL		73414900	73581800	63817800	88533100	82103200	72194800	120514000	95542900	89579500	79070500	79072100	72925700
rpsL	RIBOSOMAL	RIBOSOMAL		74313300	74262900	55512500	53308500	118471000	100106000	137760000	155268000	110113000	119530000	146434000	61885700
rpsM	RIBOSOMAL	RIBOSOMAL		19223700	14451000	12377400	14781000	16443800	12249800	24210400	18331000	21804500	17654600	17728800	17960900
rpsN	30S	30S		272362000	173097000	160206000	358654000	415156000	152063000	789823000	388988000	422841000	304779000	287842000	239008000
rpsO	RIBOSOMAL	RIBOSOMAL		55734100	63689300	73848500	135098000	43477900	73870200	77980700	33759400	136686000	137471000	109971000	121837000
rpsP	30S	30S		429816000	448733000	382662000	523226000	511271000	424569000	834952000	487536000	619547000	490325000	415385000	666552000
rpsQ	30S	30S		232696000	214676000	241132000	278740000	251926000	273032000	314097000	285533000	233633000	212654000	206139000	190193000
rpsR	30S	30S		2680890000	2086980000	2566780000	2722520000	4100700000	2350140000	4113220000	1959850000	3289970000	3611000000	3077500000	2737820000
rpsS	30S	30S		222338000	169048000	132052000	316084000	346541000	192589000	202397000	393688000	218834000	182884000	207976000	196354000
rpsT	30S	30S		732768000	587782000	514038000	785596000	793325000	941642000	907692000	562954000	786495000	740425000	661941000	687262000
rrmA	RRNA	RRNA		11499200	15200600	13752400	15634700	14031200	16503900	11498200	16095400	14818600	13706600	16411600	11230800
ruvA	Holliday	Holliday			31550.8	74138.2	0	0	0					106614	90207
ruvB	Holliday	Holliday		956088	1069130	577928	0	0	0	823059	923143	701821	338072	404696	461385
sahH	Adenosylhomocysteinase	Adenosylhomocysteinase		7653480	7684830	8552500	5739440	6030690	5763420	7473210	6291640	5494570	7641350	7203380	7642660
scoA	PROBABLE	PROBABLE		4145690	1636350	1917860	1850340	2866350	2140870	1816020	2094500	2926800	1242830	2960890	1657990
scrB	PUTATIVE	PUTATIVE		194314	1107300	539496	884444	312969	360963	371987	1431630	615749	942875	1190620	1181810
sdaA	PROBABLE	PROBABLE		552908	129171	285821	292006	432664		315940			547111	605438
sdhA	succinate	succinate		27202500	32019800	26628900	29349000	24933800	40614800	35069100	69416800	30010100	34563200	42043200	40777000
sdhB	succinate	succinate		14030100	16123000	16884800	17946600	15645000	17451400	18568600	30214600	19419800	11914000	22494200	18186900
sdhCD	succinate	succinate			1029000	435717		1034090	293999	2378240			1437730	1371940	464443
secA	PREPROTEIN	PREPROTEIN		13825200	11269400	13707900	10455300	13328600	20686500	10167700	19518400	13044900	13847500	20707000	12958600
secA2	Similar	Similar		509057	1465740	2029860	916857	514698	1384400		460654	735125	355889	3275500	1497500
secD	Preprotein	Preprotein			158677	188149	148610	297565	150444	683406			93868.8	192003	325496
secE	SecE	SecE		1458690	1216910	1576050	2425000	2008050	2351430	4312200	2481240	2237940	3009170	2569150	1492150
secF	Preprotein	Preprotein		2477270	1277860	1940260	1729210	996694	3284620	3544250	3458280	2306420	3305630	2666080	3056170
serA	Phosphoglycerate	Phosphoglycerate		12904200	14141900	11690400	11042600	8140090	12181800	12230400	31302600	11306900	12783300	16781300	17205500
serB	Phosphoserine	Phosphoserine		24114200	19559100	17989200	20043200	23882900	31193700	24705100	31666500	22167600	17984400	30108400	33481700
serC	Phosphoserine	Phosphoserine		10574600	8289210	12794600	16408800	8642030	17307900	9633440	19028700	14123100	11326200	15983200	12666800
serS	SERYL-TRNA	SERYL-TRNA		23522700	19097700	27460200	19815500	20590600	30448700	22747100	35784800	24504900	21805600	38139800	18918000
sigA	RNA	RNA		62032100	45888000	45458100	68455800	78416400	41858600	35470800	51152700	50939600	37246500	50038100	48742100
sigB	RNA	RNA		8686050	8634670	8404750	9870870	9214870	11364300	11760400	13007500	17823100	11252900	11800800	12506100
sigD	PUTATIVE	PUTATIVE		5147100	5522960	2938790	3862270	4761480	2644190	6437270	3430060	3095100	3523320	3172170	6137580
sigH	PUTATIVE	PUTATIVE		3296050	2935350	2054750	2010420	2552480	3576440	1571950	1567140	2875270	1823540	2990500	2699480
sirR	IRON	IRON		1146680	1104750	1022280	559475	771802	1058070	1177050	842581	908166	938885	1002690	816460
smc	Chromosome	Chromosome		151245	208594	211168	0	0	0	0	0	0	143853	195589	216033
smpB	SMALL	SMALL		279204	409996	902883	446487	661235	571002	828581		753654	722811	716928	803607
sod	MANGANESE	MANGANESE		21440200	24805400	29856700	16449400	23157900	18687400	28609600	17756100	20501500	16104800	27152700	24591000
speE	PUTATIVE	PUTATIVE		52252.1	70033.3	49765.5		36469.9	86819.6			77848.4			47924.5
spoU	PUTATIVE	PUTATIVE		2544900	3854190	2998560	4851230	3601090	8159420	6004710	3152320	4737360	4817950	3546290	3707080
srp	Signal	Signal		20831500	22886900	21626200	26247800	17918200	24367500	35786900	20585700	26109200	21973300	20047700	25807400
ssb	SINGLE-STRANDED	SINGLE-STRANDED		133207000	94973000	184562000	221010000	110514000	141354000	211581000	118288000	157813000	173987000	98679500	89099700
ssiF	PUTATIVE	PUTATIVE											77900.3	97344.2	150533
ssiG	PUTATIVE	PUTATIVE					408730		89951.1	66534.5	333506		207643
ssuA	ALIPHATIC	ALIPHATIC		0	0	0	0	0	0	0	0	0	1403290	3046500	27367.7
ssuB	ALIPHATIC	ALIPHATIC		0	0	0	0	0	0	0	0	0	457009	713080	3345880
ssuC	ALIPHATIC	ALIPHATIC		0	0	0	0	0	0	0	0	0	179391	304575	394345
ssuD1	Alkanesulfonate	Alkanesulfonate		0	0	0	0	0	0	0	0	0	5934040	8157810	15062900
sucB	DIHYDROLIPOAMIDE	DIHYDROLIPOAMIDE		33788500	28725300	30880400	32015800	30466300	27214700	28112300	38489300	28340800	25070100	24283000	27946100
sucC	SUCCINYL-COA	SUCCINYL-COA		323878	191835	129181	400133	183637				239884		99244.9	216875
sucD	SUCCINYL-COA	SUCCINYL-COA		2895000	1309650	1301430	2321080	1455390	647162	1252240	958671	1604230	976934	288585	1857610
sufB	component	component		9098260	13173300	10246000	10969200	8560880	12707600	14768100	15215700	10576400	13923300	16304300	16357200
sufC	Iron-regulated	Iron-regulated		39406400	43151500	41069900	51953800	35502500	40574100	44707400	35473000	36101200	54185700	47012400	56813700
sufD	components	components		2657530	1644920	1961480	2437810	2076790	2149040	2809490	3209300	3507060	3019800	2718160	3326490
suhB	MYO-INOSITOL-1(OR	MYO-INOSITOL-1(OR		3341820	2025960	5288300	3733200	2620060	2448210	3331220	3986780	2284410	3279860	2866640	2753850
tal	TRANSALDOLASE	TRANSALDOLASE		8590530	9789000	12202200	12253200	11203200	19982200	7046060	15589400	13615000	9708210	17286600	8947680
tcbF	Maleylacetate	Maleylacetate		0	0	0	0	0	0	0	0	0	129003	259156	229474
tesB2	PROBABLE	PROBABLE		2769350	2564830	6153580	5696100	2272810	4098850	3783250		472807		323158	2863070
tetA	ABC-type	ABC-type			57831.5	125949	142318		203908	194730			85277.1	45644.4	188383
tgt	PUTATIVE	PUTATIVE		1478370	2089730	1655020	2821280	2431800	3101200	2783790	3192040	2497600	2447750	3241570	2083080
thiD2	PUTATIVE	PUTATIVE		3791260	6034030	3782850	4196190	3639130	3990740	4614380	10870000	3938380	5776400	9874610	14692000
thiL	THIAMINE-MONOPHOSPHATE	THIAMINE-MONOPHOSPHATE		0	0	0	0	0	0	1727750	2307710	1244580	874354	1185450	1144520
thiX	secreted	secreted		45286400	27081100	27768800	42067400	45380900		49542900	40180800		28540700		39888800
thrB	Homoserine	Homoserine		1823700	3642230	1400060	4333540	1420910	2356790	1889710	2387020	1940510	2314140	1916560	5363350
thrC	THREONINE	THREONINE		3147140	3210250	2864530	2894880	1786890	4591990	2720770	3055470	3553520	1914660	3124310	4013630
thrS	THREONYL-TRNA	THREONYL-TRNA		1780990	3387690	6166890	4184080	4204890	3755870	6690570	6909250	2900520	10612600	11493300	6100680
thtR	THIOSULFATE	THIOSULFATE		10936900	13530600	18298700	38263500	10840200	12490000	9615950	14578800	14255400	9808900	13108000	8826900
thyA	PROBABLE	PROBABLE		4411930	2871500	3185030	3528860	4082360	5921210	2491100	4643880	6637750	5470270	6158820	3393940
tig	TRIGGER	TRIGGER		60248100	57070400	71008900	68877100	67261200	122562000	72352200	66015500	95287200	65867300	86468500	52992700
tkt	TRANSKETOLASE	TRANSKETOLASE		12011900	13792500	12892900	11627700	12139500	12991400	11212000	22122600	13405800	10153300	14878300	13526200
tmk	THYMIDYLATE	THYMIDYLATE		1128390	1202860	1132380	1724310	1362690	1674080	1237550	1113950	1740270	1151770	1029320	847609
topA	DNA	DNA		2399710	2411640	3436510	2676510	2760490	2750760	2730580	2639330	3576900	1548920	2179410	3442600
tpi	TRIOSEPHOSPHATE	TRIOSEPHOSPHATE		10909000	7714170	16357600	15550900	7015450	12992200	10472000	12763100	11507600	9583080	16065400	9112140
tpx	THIOL	THIOL		38131300	19823100	13783400	23803700	45660500	23748600	38159900	45288300	27064300	12165600	18900200	26913100
treS	Trehalose	Trehalose		379986	355321	681535	312654	256304	300603	239380	254943	164510	404879	649294	257405
treX	PROBABLE	PROBABLE			375878	230072	455272		102508	225051	581909	107032	263706	240268	160387
treY	MALTOOLIGOSYL	MALTOOLIGOSYL		1109690	1618180	821368	908698	1175640	1437470	593855	890679	671071	790199	952235	1117330
treZ	MALTO-OLIGOSYLTREHALOSE	MALTO-OLIGOSYLTREHALOSE		264289	816409	558748	372938	434187	570927	231277	539913	348557	171714	378313	214758
trmD	TRNA	TRNA		2386750	749165	1951340	725408	908158	1573260	2781480	611963	951138	2107350	1235370	1459700
trpA	TRYPTOPHAN	TRYPTOPHAN		6414070	4515720	6732530	3351860	4352060	7915060	3861660	5320940	5088350	4062930	5947760	3961330
trpB	TRYPTOPHAN	TRYPTOPHAN		849968	879960	666364	871932	1164890	791641	982046	1277360	461547	873133	1376220	958851
trpCF	INDOLE-3-GGLYCEROL-PHOSPHATE	INDOLE-3-GGLYCEROL-PHOSPHATE		2384740	1137540	2660580	1195490	2622880	2466210	1730150	2927780	2488810	2480490	4757870	1440540
trpD	ANTHRANILATE	ANTHRANILATE		1981420	995534	1133200	782509	1544310	929342	549181	1383790	1506590	330204	1095920	544576
trpE	ANTHRANILATE	ANTHRANILATE		353359	318162	552800	344239		453087	768675	835788	400729	421593	415456	941891
trpS	TRYPTOPHAN	TRYPTOPHAN		23102300	26092200	35082500	25288000	17864100	32684200	44763700	14985400	21125800	18768500	18805100	19079900
truA	PROBABLE	PROBABLE			3551140					3079580					4625710
truB	TRNA	TRNA		1881500	1345250	2275400	2210600	1473290	1385030	2702220	3652650	1449120	1224530	2397060	3656970
trxB	THIOREDOXIN	THIOREDOXIN		16331700	19251600	19932100	20809900	11655900	23293800	14629300	22521100	13908300	16303400	20700000	14243400
trxB1	THIOREDOXIN	THIOREDOXIN		67884800	49586400	54716100	86679300	88638600	96971100	50894200	188200000	79609800	43229700	38549400	41738700
trxC	THIOREDOXIN	THIOREDOXIN		101054000	46179500	26134300	76225600	41938400	73223600	36671200	94542000	36626900	34828800	28941100	26499600
tsf	TRANSLATION	TRANSLATION		283409000	197895000	201764000	208530000	214871000	201465000	249837000	252052000	204111000	203458000	245541000	212240000
tsnR	23S	23S		4393460	6013540	6449470	1356320	4831410	8770540	7722010	12849100	7282120	7638680	11064600	5558730
tuf	ELONGATION	ELONGATION		389193000	351212000	411394000	303262000	303434000	382923000	446373000	801115000	275789000	478956000	710300000	496852000
tyrA	PUTATIVE	PUTATIVE		1651210	2006000	1254720	1461290	2002040	2647590	1127110	3270410	983653	1324410	1364500	1266190
tyrS	TYROSYL-TRNA	TYROSYL-TRNA		5044590	4075490	5559900	3314830	2909350	3145410	6743630	4096200	4458350	4447590	5787080	4375130
ubiE	UBIQUINONE/MENAQUINONE	UBIQUINONE/MENAQUINONE		1522780	1128500	2169020	2545370	9413660	1552840	2760470	2144740	2392420	2555700	2054420	1671060
udgA1	UDP-GLUCOSE	UDP-GLUCOSE		4914270	6628160	3282170	4572130	2850350	5006620	7598500	10333800	3468780	2826830	5803000	7842410
udgA2	UDP-GLUCOSE	UDP-GLUCOSE		132295	93431.5	151309	131752	125759	181460	137193	197311	118145	112251	193259	182335
ung	PROBABLE	PROBABLE			2573620	2994040	6779990	4516460	2391520	4187590	4592740	3443460	3357890	3687750	3575290
upp	PUTATIVE	PUTATIVE		51957100	41532300	39082600	100856000	55291200	36284500	94933400	50423700	45519000	62877500	59619500	67941800
uppS1	PUTATIVE	PUTATIVE		873410	734833	847759	1506680	2229640	1820730	933357	2501640	1758540	818750	2185730	444465
uppS2	PUTATIVE	PUTATIVE		453090	1078000	916939	585071	342451	1073550	339762	481012	376657	643003	705530	560996
uraA	PUTATIVE	PUTATIVE			55150.6	22955.5							174106
ureA	PROBABLE	PROBABLE		411646	171239	220452	347262	515755	418690		382593	239958	170536	109593	249450
ureB	UREASE	UREASE		20472300	6767500	6432770	15099100	18387300	14688200	7406160	29883800	13537900	4480920	6753520	10294900
ureC	UREASE	UREASE		380022	650935	936552	758725	419975	859070	836430	579603	700180	549434	435494	558355
ureD	UREASE	UREASE			33933.8	94037.5	54206.7	40269.8		86040.9		42084	39809.9	47866.9	47706.4
ureE	UREASE	UREASE		9115720	2212050	2727410	2087580	3265650	2437260	944034	864414	1531620	4201260	3300050	883651
ureF	UREASE	UREASE		2685930	2120070				4665670					3190420	2236190
ureG	UREASE	UREASE		803867	321039	264887	360747	356712		752002	1660600	540935	1060700	455055	598012
ureR	Bacterial	Bacterial			4839.77	3587.83	5690.01			2799.05
uspA1	Universal	Universal		516247000	247971000	258970000	399550000	521196000	425196000	461763000	877522000	402753000	307588000	541635000	330556000
uspA2	Universal	Universal		20699100	17463800	7423800	8292910	9345470	25752700	12565200	18802600	14094200	4450560	6207010	14980000
uspA3	UNIVERSAL	UNIVERSAL		18855500	18596400	17714200	12367700	13068600	22997500	15365500	24590900	16245600	15028900	17217000	12475100
uvrA	Excinuclease	Excinuclease		887626	451548	528475	564815	987055	513292	526004	1355200	846122	465594	686470	448514
uvrB	EXCINUCLEASE	EXCINUCLEASE		904564	1794670	1348150	2721690	1091600	1912680	1855660	1544510	2205260	1528540	1142940	1671680
valS	PUTATIVE	PUTATIVE		1641270	1828120	2251720	2206490	2621530	4295070	5041570	3528040	2180380	2175780	3014870	4597980
wbbL	putative	putative		572177	414559	646808	3898570	413383	1328120	461130	1768030	654973	536854	804904	514972
whiB1	Transcription	Transcription		79863.3	25913.6	20833.4	133070	57646	72166.5	37848	226991	93895	36652.3	43450.2
whiB2	Transcription	Transcription		1334430	975135	397945	2872680	5362010	1412140	2179110	3355470	2336340	1107140	1609530	4118310
wzz	cell	cell		2930770	2674850	3763680	2173500	2199560	3862190	4246390	1901280	2927260	3856990	3077850	4349270
xerD	INTEGRASE/RECOMBINASE	INTEGRASE/RECOMBINASE		1093190	858441	1046870	2188780	996064	2149520	1168780	1810630	1674510	742033	411976	1913780
xseA	EXODEOXYRIBONUCLEASE	EXODEOXYRIBONUCLEASE		2088590	2497850	2056660	1964000	2351560	1230740	1936140	1742820	945739	1791750	1044820	2263840
xseB	PUTATIVE	PUTATIVE		21717000	8617380	6636010	14053100	40565900	35691500	25978000	36437900	37755400	8796880	15237200	20902300
xthA	EXODEOXYRIBONUCLEASE	EXODEOXYRIBONUCLEASE		432186	259288	257032	216743	673424	590453	302936	649504	871587	263572	483389	234896
xylC	BENZALDEHYDE	BENZALDEHYDE		14127900	11697800	20824100	15029500	10122200	17558000	11821200	15878000	10761800	8354960	9643830	5476440
zwf	GLUCOSE-6-PHOSPHATE	GLUCOSE-6-PHOSPHATE		1289710	1729390	2742700	1759510	2030920	1473530	3660330	2410560	1547520	2723940	2850610	3690990

## Sheet: +CGP3 raw values (b)
Supplementary Table 5.b. Raw values and differential protein abundance during phage infection in +CGP3 cells. Raw protein abundance values for all samples following filtering based on minimum peptide count criteria. Only proteins supported by at least 2 peptides were retained and classified (0_1-3 for t 0 min; 1_1-4 for t = 15 min 2_1-3 for t 30 min; 3_1-3 for t 60 min).
Protein.Group	Protein.Names	Genes	First.Protein.Description	0_1	0_2	0_3	1_1	1_2	1_3	1_4	2_1	2_2	2_3	3_1	3_2	3_3
JeanGrey_10	hypothetical	hypothetical					1430000	2580000	1030000	807927	1920000	3850000	3610000	2960000	5660000	1890000
JeanGrey_102	hypothetical	hypothetical										12726,2
JeanGrey_105	hypothetical	hypothetical										19953,8		8154,71	8656,19	6205,65
JeanGrey_111	hypothetical	hypothetical					441511		188244	368819	694608	378666	641806	608818	1240000	602655
JeanGrey_113	hypothetical	hypothetical										107610		80736,6		63300,3
JeanGrey_114	hypothetical	hypothetical							8279,96	4344,23	5136,8	11487,8		6193,21	5126,82
JeanGrey_117	hypothetical	hypothetical					2260000	1190000	1890000	855725	4100000	6370000	2880000	3620000	5170000	2740000
JeanGrey_118	hypothetical	hypothetical									743744	929864	904744	478442	246947	387950
JeanGrey_119	membrane	membrane							48842,7		36402,2		78817,2		11639,9
JeanGrey_121	hypothetical	hypothetical					451744					1070000		1650000	1090000
JeanGrey_122	hypothetical	hypothetical					2460000	6480000	5530000	3220000	10000000	18200000	19000000	12800000	12800000	17400000
JeanGrey_123	hypothetical	hypothetical													439947
JeanGrey_128	minor	minor		0	0	0	3560000	5890000	8160000	3030000	4260000	15100000	11900000	2830000	2380000	3220000
JeanGrey_130	minor	minor		0	0	0	1510000	2470000	2990000	1710000	2200000	4050000	3530000	1600000	1090000	1430000
JeanGrey_132	minor	minor		0	0	0		765392	399347	293313	565484	694918	629140	895892	390254	638842
JeanGrey_134	minor	minor		0	0	0	2370000	8450000	7650000	4290000	5230000	15300000	11900000	3730000	3610000	2480000
JeanGrey_135	hypothetical	hypothetical										246180	193140	63783,6	108376
JeanGrey_136	hypothetical	hypothetical						739092	406610	165592		342642	551526
JeanGrey_137	hypothetical	hypothetical					1970000	1260000	1310000	714896	2270000	4900000	4670000	1350000	925368	535674
JeanGrey_2	hypothetical	hypothetical					266774					384572	286066	1060000	764298	381963
JeanGrey_25	hypothetical	hypothetical					7650000	19500000	20700000	8160000	19100000	28300000	51900000	9430000	16100000	10500000
JeanGrey_27	portal	portal		0	0	0	0	0	0	0	2520000	4880000	7040000	1770000	1440000	5350000
JeanGrey_29	hypothetical	hypothetical					175531	412567	367261	315016	578659	693352	143543	758166	197850	311641
JeanGrey_3	hypothetical	hypothetical							47238,7		28607,9	69426,2	71840,3	28552,8	9964,32
JeanGrey_30	capsid	capsid		0	0	0	4220000	4840000	6030000	3410000	4100000	8940000	4910000	3020000	1840000	2200000
JeanGrey_31	hypothetical	hypothetical					2880000	4200000	7560000	3910000	8890000	24300000	4870000	4700000	3290000	1140000
JeanGrey_32	major	major		0	0	0	58800000	123000000	139000000	64400000	73500000	182000000	131000000	105000000	67500000	80600000
JeanGrey_37	hypothetical	hypothetical					7240000	19000000	24600000	17000000	25300000	26000000	21900000	5390000	7620000	8160000
JeanGrey_38	hypothetical	hypothetical							497219		750924	1830000	504536	731725		4810000
JeanGrey_39	hypothetical	hypothetical					1610000	3210000	3680000	2470000	2930000	6690000	5630000	2240000	1940000	3780000
JeanGrey_40	head-to-tail	head-to-tail		0	0	0	2150000	2270000	5640000	780169	3640000	3640000	5010000	0	0	0
JeanGrey_41	hypothetical	hypothetical													427463
JeanGrey_42	hypothetical	hypothetical					393034	610282	795887	739714	2060000	4960000	2650000	1310000	225024	456235
JeanGrey_43	tail	tail		0	0	0	40200000	50200000	62000000	38800000	40300000	97300000	109000000	47200000	41900000	49800000
JeanGrey_44	hypothetical	hypothetical					9670000	15600000	13800000	7340000	16600000	32300000	15400000	10300000	7990000	12300000
JeanGrey_48	tape	tape		0	0	0	1670000	1950000	1870000	1330000	1380000	2530000	1330000	693772	818932	958919
JeanGrey_49	minor	minor		0	0	0	659047	2650000	1280000	1040000	889144	1460000	1730000	508581	242502	874332
JeanGrey_5	hypothetical	hypothetical					255544	153899	102290		497136	2480000	1520000	1070000	807389	944582
JeanGrey_51	hypothetical	hypothetical					1960000	3700000	4770000	2650000	2920000	6670000	5590000	2340000	8550000	4130000
JeanGrey_52	minor	minor		0	0	0	148035	355082	377855	327492	295014	306578	677742	186653	450601	119778
JeanGrey_54	baseplate	baseplate		0	0	0	409690	452242		198526	273942	543021	575718	143458	85853,9	176153
JeanGrey_55	baseplate	baseplate		0	0	0	3660000	5800000	11100000	7880000	4240000	7870000	9410000	2300000	6070000	3130000
JeanGrey_56	minor	minor		0	0	0	2810000	10800000	5370000	4930000	2670000	8190000	5420000	2060000	3050000	8620000
JeanGrey_57	minor	minor		0	0	0	2640000	3790000	5790000	1850000	2920000	5900000	5320000	1900000	3060000	2890000
JeanGrey_6	hypothetical	hypothetical														1700000
JeanGrey_61	hypothetical	hypothetical										82083,7	290063			264262
JeanGrey_71	hypothetical	hypothetical												453806
JeanGrey_83	hypothetical	hypothetical		12821	13365,9	11245,3		18055,8	6478,1	25945,9			8148,91	16805,6		25436,3
JeanGrey_94	SSB	SSB		0	0	0	0	0	0	0	206744	868834	303844	356866	2910000	1030000
accBC	BIOTIN	BIOTIN		175000000	133000000	147000000	214000000	163000000	158000000	211000000	137000000	185000000	158000000	242000000	165000000	192000000
accDA	ACETYL-COENZYME	ACETYL-COENZYME		18400000	17900000	11700000	6560000	7950000	7500000	9810000	6660000	7810000	10000000	5870000	4950000	15000000
aceA	ISOCITRATE	ISOCITRATE		6660000	2780000	3900000	3050000	1590000	3100000	5880000	3580000	4050000	3550000	3240000	2600000	4150000
aceB	MALATE	MALATE		887936	1140000	1540000	884467	760805	751163	1400000	883541	930769	663611	663712	549546	587266
aceE	PYRUVATE	PYRUVATE		127000000	126000000	116000000	155000000	96500000	98000000	109000000	103000000	100000000	97300000	120000000	118000000	133000000
ackA	ACETATE	ACETATE		1700000	4300000	5980000	1660000	2580000	2500000	2410000	2280000	1970000	1290000	4250000	1680000	1730000
acn	ACONITASE	ACONITASE		94700000	89500000	98500000	105000000	89500000	103000000	96200000	79200000	79700000	99600000	179000000	143000000	186000000
acpM	ACYL	ACYL		72100000	69700000	75200000	34300000	68400000	48500000	39500000	58800000	50500000	55800000	33200000	17100000	35400000
actA	BUTYRYL-COA:ACETATE	BUTYRYL-COA:ACETATE		132000000	141000000	111000000	144000000	137000000	113000000	124000000	121000000	106000000	104000000	131000000	97500000	134000000
adhA	Zn-dependent	Zn-dependent		12800000	13700000	8860000	8530000	21100000	7290000	15200000	9020000	10200000	3190000	5880000	9870000	3960000
adhC	ALCOHOL	ALCOHOL		3630000	3870000	3420000	3820000	3380000	3630000	2880000	3660000	2550000	4190000	5540000	3940000	7260000
adhE	PUTATIVE	PUTATIVE		28500000	25100000	34600000	23700000	30600000	28500000	23000000	26000000	22600000	23900000	46700000	20600000	35100000
adk	ADENYLATE	ADENYLATE		752000000	894000000	872000000	848000000	798000000	794000000	734000000	994000000	952000000	1020000000	801000000	627000000	757000000
aecD	Cystathionine	Cystathionine		639145	730904	1170000	1270000	831153	781608	627700	642223	887475	1140000	677241	492559	1210000
alaS	ALANYL-TRNA	ALANYL-TRNA		11800000	8250000	9570000	12200000	10200000	8110000	9100000	18900000	16100000	9880000	18700000	16700000	20400000
alr	ALANINE	ALANINE		212521		198253	382083	491352	189400	278015	568800	275647	262570	338678	206560	579672
amiA	PUTATIVE	PUTATIVE		4890000	5080000	5290000	7110000	4780000	7030000	5520000	3990000	5720000	3520000	6730000	4760000	9410000
amn	AMP	AMP		1290000	1230000	1600000	1100000	1340000	1050000	1570000	816109	960781	1200000	1220000	2150000	1950000
amtR	AMTR	AMTR		0	0	0	0	0	0	0	1430000	1910000	597507	2120000	4320000	1520000
amyE	MALTOSE-BINDING	MALTOSE-BINDING		425000000	604000000	621000000	464000000	445000000	422000000	594000000	348000000	361000000	389000000	275000000	350000000	284000000
ansA	L-ASPARAGINASE	L-ASPARAGINASE		0	0	0	0	0	0	0	0	0	0	2700000	1070000	783681
apt	ADENINE	ADENINE		5350000	6740000	8440000	11700000	5240000	11300000	7580000	11200000	21000000	15900000	10500000	14000000	18800000
arcB	PROBABLE	PROBABLE		599696	1770000	993237	1740000	432578	480427	374490	1270000	1640000	1760000	781296	374435	764228
argB	ACETYLGLUTAMATE	ACETYLGLUTAMATE		7450000	5900000	3160000	6690000	1550000	1860000	2270000	2100000	3920000	2430000	2680000	1380000	6480000
argC	N-ACETYL-GAMMA-GLUTAMYL-PHOSPHATE	N-ACETYL-GAMMA-GLUTAMYL-PHOSPHATE		3290000	2170000	2790000	1690000	1540000	1340000	2640000	2070000	2510000	2090000	3780000	1120000	4230000
argD	ACETYLORNITHINE	ACETYLORNITHINE		1470000	3260000	1530000	1510000	2470000	2520000	4190000	3960000	2090000	1430000	4690000	2400000	3360000
argF	ORNITHINE	ORNITHINE		2240000	1550000	2190000	1490000	1320000	3100000	1670000	673032	1050000	3560000	1220000	3590000	2570000
argG	ARGININOSUCCINATE	ARGININOSUCCINATE		67300000	52900000	59700000	87200000	76000000	98300000	74600000	73600000	87300000	88900000	89100000	114000000	95600000
argH	ARGININOSUCCINATE	ARGININOSUCCINATE		17900000	13000000	12900000	14900000	8700000	12200000	14200000	18300000	20200000	12700000	21700000	12200000	27400000
argJ	GLUTAMATE	GLUTAMATE		26200000	20100000	31500000	11600000	18200000	24700000	19800000	19400000	18200000	15400000	24100000	14400000	12000000
argR	ARGININE	ARGININE		3200000	3990000	5870000	3620000	3590000	3130000	4840000	5470000	7750000	3970000	3610000	2020000	4580000
argS	ARGINYL-TRNA	ARGINYL-TRNA		7760000	7720000	7290000	5180000	8520000	6580000	9260000	7930000	6150000	8700000	6150000	9200000	10100000
aroA	3-PHOSPHOSHIKIMATE	3-PHOSPHOSHIKIMATE		18400000	17200000	13700000	11300000	18000000	13100000	13800000	18600000	9930000	14900000	19500000	11100000	18700000
aroB	PROBABLE	PROBABLE		196126	365194	25173,7	108045	352412	301408	317368	318667	529346	679544	367176	167716	155311
aroC	PUTATIVE	PUTATIVE		2080000	2360000	3230000	4370000	2070000	2430000	1960000	5070000	2900000	1630000	4120000	2880000	3740000
aroD	PROBABLE	PROBABLE			1410000			1320000	1770000	912968	527209	653718	554182	487119	1870000	1350000
aroE	PUTATIVE	PUTATIVE		3950000	3030000	2460000	2370000	1850000	4380000	3540000	2000000	2730000	2170000	2480000	5500000	1660000
aroE2	PUTATIVE	PUTATIVE		2920000	2960000	2430000	2890000	2120000	1020000	2050000	1720000	1380000	2200000	7670000	3590000	5520000
aroE3	PROBABLE	PROBABLE		235491		189731	364020	949899	362510	908564	592742	526623	340574	825862	361241	152664
aroF	PROBABLE	PROBABLE		633251	383197	490532	969529	711916	505578	438973	646967	55230,4	878298	1990000	712131	573916
aroG	PHOSPHO-2-DEHYDRO-3-DEOXYHEPTONATE	PHOSPHO-2-DEHYDRO-3-DEOXYHEPTONATE		43900000	36100000	37400000	32000000	20700000	18300000	24100000	26000000	22200000	33100000	31500000	34000000	28900000
aroK	SHIKIMATE	SHIKIMATE		2510000	4720000	6020000	4140000	8260000	8570000	6550000	5440000	4340000	9880000	8560000	4270000	11400000
arsX	ARSENATE	ARSENATE		5680000	5220000	6790000	2400000	5210000	4330000	4120000	4250000	4800000	3470000	4470000	2350000	6960000
asd	ASPARTATE-SEMIALDEHYDE	ASPARTATE-SEMIALDEHYDE		43100000	39900000	46200000	23400000	41300000	34600000	37800000	75800000	37700000	44400000	32000000	28200000	47200000
aspA	ASPARTATE	ASPARTATE		3140000	4160000	4570000	4690000	2990000	4130000	3250000	3420000	3690000	3550000	3850000	3650000	4980000
aspB	ASPARTATE	ASPARTATE		14800000	19200000	21000000	19100000	15600000	17900000	12300000	15100000	14300000	18900000	22000000	23300000	23000000
aspS	PROBABLE	PROBABLE		9880000	9230000	7060000	16000000	11400000	10800000	11600000	10000000	12300000	12900000	23000000	16100000	38500000
atpA	PROBABLE	PROBABLE		306000000	275000000	218000000	279000000	264000000	245000000	229000000	306000000	317000000	213000000	334000000	261000000	264000000
atpC	PROBABLE	PROBABLE		17200000	37000000	19400000	34200000	56000000	25500000	45800000	12500000	12400000	15800000	18600000	58800000	33700000
atpD	ATP	ATP		314000000	329000000	249000000	574000000	450000000	298000000	414000000	395000000	435000000	377000000	712000000	808000000	1090000000
atpF	ATP	ATP		132000000	219000000	198000000	285000000	208000000	207000000	225000000	220000000	254000000	145000000	167000000	277000000	148000000
atpG	ATP	ATP		270000000	419000000	306000000	441000000	377000000	449000000	409000000	416000000	450000000	322000000	382000000	470000000	270000000
atpH	H+-ATPASE	H+-ATPASE		45300000	78300000	57900000	104000000	91300000	141000000	133000000	88000000	105000000	74400000	106000000	79400000	127000000
bcp	PROBABLE	PROBABLE		35800000	32400000	20700000	74100000	38200000	27300000	62100000	40600000	30400000	35400000	57300000	43200000	30800000
bex	BEX	BEX		60400000	37900000	67800000	51500000	96900000	88100000	77000000	66800000	101000000	91300000	67100000	54300000	49200000
bioB	BIOTIN	BIOTIN		4430000	6000000	2600000	6070000	3290000	4600000	4140000	2350000	5670000	6050000	2160000	7760000	3450000
bioD	DETHIOBIOTIN	DETHIOBIOTIN		4800000	6280000	8810000	5840000	2490000	3710000	4350000	3060000	3600000	2650000	1290000	1510000	1130000
birA	BIFUNCTIONAL	BIFUNCTIONAL		3260000	3040000	2130000	3760000	8560000	5820000	3300000	5170000	7990000	2480000	2730000	3240000	2400000
butA	L-2,3-butanediol	L-2,3-butanediol		103000000	142000000	178000000	128000000	99100000	111000000	101000000	94600000	114000000	112000000	54900000	42400000	52300000
capD	PROBABLE	PROBABLE		8280000	5740000	7060000	13700000	5220000	3690000	2710000	5000000	9330000	4030000	5780000	8410000	5260000
carA	CARBAMOYL	CARBAMOYL		1660000	2290000	1740000	1310000	3080000	2970000	2740000	1870000	1950000	3230000	2450000	1930000	1860000
carB	PUTATIVE	PUTATIVE		9040000	8850000	13100000	13700000	9780000	8230000	7260000	9300000	10600000	14300000	22500000	14100000	20700000
catA1	CATECHOL	CATECHOL		17600000	24200000	20000000	35800000	17700000	15000000	20300000	11500000	11800000	32500000	14000000	11000000	19500000
catA2	CATECHOL	CATECHOL					33260	454825					140610		121587	225207
catA3	CATECHOL	CATECHOL		6780000	5730000		1050000	2050000	4850000	2880000	1470000	4280000	2140000	902721	2170000
ccpA1	PROBABLE	PROBABLE		2160000	2160000	1910000	7350000	1420000	1320000	1220000	5440000	1250000	1680000	2300000	3810000
cg0006	CONSERVED	CONSERVED						48874,6		59587,8	27226,7		50930,6	31680	39122,4	115127
cg0008	HYPOTHETICAL	HYPOTHETICAL		551579	1230000	1780000	1730000	966656	913559	2200000		681450	1430000	881904	1150000	1410000
cg0010	conserved	conserved		26700000	37300000	38000000	84000000	29200000	30400000	25800000	35500000	30900000	67900000	55200000	42700000	33300000
cg0012	PUTATIVE	PUTATIVE											264404	874743	539546	875666
cg0019	Bacterial	Bacterial											2340000		8880000
cg0021	hypothetical	hypothetical							347572		318199	298082	627838
cg0026	HCCA	HCCA		2710000	4970000	3530000	3150000	4330000	6070000	3330000	3800000	5310000	3820000	5200000	5560000	4310000
cg0039	putative	putative					217704	326164		432165			429618	340611	464667
cg0044	PROBABLE	PROBABLE		1040000	1340000	1530000	1330000	1760000	1520000	1850000	1260000	1300000	1410000	1230000	1410000	818845
cg0045	PROBABLE	PROBABLE					165107							243699	124677	137747
cg0046	PROBABLE	PROBABLE		1170000	1060000	1240000	931926	940300	1510000	828081	1280000	751576	1570000	1130000	935799	1270000
cg0047	conserved	conserved		25800000	94400000	69000000	42300000	59800000	66200000	70400000	37600000	40000000	36900000	42200000	66100000	38900000
cg0055	putative	putative			7840000	4410000	5310000	8030000	7680000	3250000	2280000	3230000	2700000	2690000	3420000	1180000
cg0063	Secreted	Secreted		2400000	634813	1800000	446491	727965	1010000	1950000	1240000	928467	2270000	611891	483544	677534
cg0064	conserved	conserved		43600000	38700000	21600000	13300000	54700000	51800000	38400000	21200000	50900000	29200000	14500000	5340000	15300000
cg0066	hypothetical	hypothetical		188680		113040	871906	258015		239688	163440	451042	130676	799265	487050	155982
cg0075	conserved	conserved		7150000	8320000	9760000	6320000	8550000	8380000	8150000	4910000	4760000	14400000	5170000	4570000	11000000
cg0076	hypothetical	hypothetical			129036	107766	102739	122446	163651		164471	232977	405190	241291	466568	438318
cg0080	CorA-like	CorA-like		2000000	1650000	1450000	510515	1840000	1110000	1860000	1360000	1500000	3400000	1070000	451665	3380000
cg0081	putative	putative		2510000	3980000	3300000	4040000	1740000	2700000	2620000	2430000	3780000	4320000	2020000	2290000	2690000
cg0091	D-isomer	D-isomer		3810000	1560000	3410000	1540000	950279	666703	1210000	947209	964323	2430000	0	0	0
cg0092	PUTATIVE	PUTATIVE		17100000	19400000	13900000	16100000	13100000	4320000	10400000	7620000	5480000	7080000	9060000	7840000	12300000
cg0096	conserved	conserved		8330000	15900000	19800000	5740000	7050000	20600000	6040000	15600000	6910000	16500000	3370000	3950000	1660000
cg0097	conserved	conserved				693749	88734,7		100126	142049	71919,6	123512		33027,4
cg0107	secreted	secreted		9680000	10200000	18800000	11100000	27400000	29900000	19200000	23400000	21400000	17900000	18500000	10200000	13600000
cg0108	PUTATIVE	PUTATIVE							87348,8					280479	104273	94112,2
cg0109	TRIACYLGLYCEROL	TRIACYLGLYCEROL		3080000	4110000	4210000	2670000	2980000	4430000	2710000	3160000	4630000	6470000	1720000	1380000	5150000
cg0111	hypothetical	hypothetical														107860
cg0122	putative	putative		1690000	882310	1060000	571541	884777	851549	892027	1210000	503136	887980	687303	1490000	2250000
cg0123	PUTATIVE	PUTATIVE					117489	197874			242867	239800	302829	182893	155104	203073
cg0131	PUTATIVE	PUTATIVE		8210000	7870000	8730000	7870000	10700000	10500000	11800000	7640000	7560000	4760000	6740000	9150000	4940000
cg0135	PUTATIVE	PUTATIVE		707915							293135				623050
cg0139	Bacterial	Bacterial		1670000	1530000	1920000	666121	2230000	1230000	1710000	1330000	1410000	3720000	194006	195530	4310000
cg0141	Glyoxalase/Bleomycin	Glyoxalase/Bleomycin		53800000	57400000	79700000	95000000	50700000	57900000	56400000	35000000	41000000	98300000	31800000	177000000	40200000
cg0146	Bacterial	Bacterial		317404	576325	315538	816570		515161	357971	375780	719358	403271	607466	649228	879448
cg0152	hypothetical	hypothetical		1540000	748694	953558	1140000	577849	2720000	946990	1130000	1180000	1340000	1230000	773832	1120000
cg0154	haloacid	haloacid		2660000	3060000	1700000	1330000	2720000	984133	3030000	1580000	1610000	2880000	830745	969998	2250000
cg0155	PUTATIVE	PUTATIVE			431790	419187	868611	1870000	364115	674558	1660000	2010000	885641	1310000	299647	482052
cg0156	Bacterial	Bacterial		8700000	8360000	6710000	9590000	11900000	8450000	14600000	22900000	15000000	13600000	30500000	16400000	16200000
cg0161	putative	putative		7490000	9090000	7730000	9490000	9120000	8490000	9360000	6230000	6360000	6850000	9400000	10600000	9310000
cg0162	MEMBRANE	MEMBRANE		1010000	835480	1380000	726164	969544	708083	416211	1240000	1420000	1970000	671283	336058	904953
cg0166	REPEAT	REPEAT		6810000	8280000	9390000	3710000	6840000	8580000	5660000	11200000	10700000	12700000	6160000	6130000	6200000
cg0173	CONSERVED	CONSERVED		4190000	4340000	3670000	5340000	4790000	1760000	3440000	6120000	8590000	7270000	6410000	5720000	11600000
cg0177	hypothetical	hypothetical		96152,2		291542	63477,3	202655	263561		75753,9	67901,6	140752	27404,3	43419	58271,7
cg0184	CONSERVED	CONSERVED		2410000	4000000	8940000	3730000	3540000	4600000	4120000	4130000	8560000	8770000	1970000	2040000	3390000
cg0185	Glyoxalase/Bleomycin	Glyoxalase/Bleomycin		257935	298118	332455	1020000	129792	1270000	183189	179095	1130000	199776	221358	172733	745392
cg0188	conserved	conserved		615482	1010000	327890		456986	435780	434317		409763	458045		324600	254226
cg0191	translation	translation		4240000	3740000	3030000	2670000	3200000	3490000	3830000	2630000	2560000	3740000	1810000	1590000	1940000
cg0192	conserved	conserved		39500000	77300000	48000000	88100000	57600000	50500000	55400000	32400000	39200000	26000000	22900000	42300000	37000000
cg0195	membrane	membrane				1460000	831389	1310000			1510000	908482	2150000	1250000	2730000	2430000
cg0196	Bacterial	Bacterial		2300000	3130000	3100000	3430000	2690000	2560000	2790000	2290000	2270000	3260000	2010000	3610000	1920000
cg0198	conserved	conserved		17300000	32200000	20000000	26100000	22500000	21300000	30600000	18600000	29100000	25500000	8940000	39400000	13700000
cg0207	HYPOTHETICAL	HYPOTHETICAL		1040000	2210000	1590000	670703	1120000	1010000	983942	341636	344891	316135	346630	334292	603805
cg0208	hypothetical	hypothetical		175373	545196	82088,2	171378	117246	157097	87906,4	131265	289728	342691	100937	243206	120355
cg0210	LACI-FAMILY	LACI-FAMILY											670840		743474
cg0211	PUTATIVE	PUTATIVE		929326	617220	468743	783303	668242	650206	666707	532662	643768	877928	1250000	365950	473161
cg0212	phosphate	phosphate		1490000	1790000	1040000	663741	1020000	545963	2200000	650910	3640000	1260000	900017	1170000	388826
cg0217	Bacterial	Bacterial		178403	319029	225210		54159,1	29396,7	134705				3170000		64408,9
cg0218	O-METHYL	O-METHYL		0	0	0	0	0	0	0	0	0	0	812926	632232	1590000
cg0220	Acetyltransferase,	Acetyltransferase,				128002					265750	222902		219933	161199	148047
cg0221	PROBABLE	PROBABLE									248183	271601			259703	131025
cg0223	METABOLITE	METABOLITE		0	0	0	0	0	0	0	786057	657247	1270000	0	0	0
cg0228	SENSOR	SENSOR		9540000	11000000	9910000	9560000	10100000	8610000	11600000	7540000	9850000	8360000	4490000	6560000	4770000
cg0233	conserved	conserved		12100000	11700000	13700000	10900000	9360000	7830000	9560000	10900000	9140000	6160000	8960000	6770000	6390000
cg0236	membrane	membrane		2800000	3460000	1170000	1990000	2610000	4620000	1270000	4560000	5110000	4460000	4910000	2820000	4620000
cg0237	PUTATIVE	PUTATIVE		18600000	22000000	19000000	23900000	22700000	23200000	27200000	24000000	20100000	14900000	16800000	23100000	16400000
cg0238	L-GULONOLACTONE	L-GULONOLACTONE		4890000	6210000	5100000	4190000	7490000	2350000	5600000	7190000	4490000	4420000	10400000	8750000	3830000
cg0239	hypothetical	hypothetical		116000000	228000000	243000000	111000000	349000000	409000000	127000000	158000000	219000000	216000000	111000000	58700000	94200000
cg0240	membrane	membrane			334562	408224	271265	155546	153802	136946	244129	106235	405855	380682	134137	325580
cg0245	conserved	conserved		270295	893776	211530		1820000	590649	2230000	313072	430951	1850000	285248	2570000	1050000
cg0246	GLYCOSYL	GLYCOSYL		275224	171440		188019	122387	280297	306326	371827	49915		130306	346126	711520
cg0247	conserved	conserved		3900000	4970000	6400000	4230000	3170000	3920000	3690000	7060000	4360000	3690000	4490000	2040000	3510000
cg0248	PUTATIVE	PUTATIVE		5910000	5370000	5980000	3730000	4170000	10200000	3920000	5580000	4970000	5770000	5600000	7590000	4570000
cg0250	AMINOTRANSFERASE	AMINOTRANSFERASE		438130	714197		917647	550697	996265	1590000	972196	2310000	782789	1060000	428838	264896
cg0251	QUINONE	QUINONE		0	0	0	0	0	0	0	0	0	0	2050000	1290000	985514
cg0257	HESA/MOEB/THIF	HESA/MOEB/THIF		0	0	0	0	0	0	0	0	0	0	382561	180606	680261
cg0264	PUTATIVE	PUTATIVE		4890000	6510000	7200000	2800000	7410000	4920000	9680000	6600000	7470000	8180000	2270000	3320000	2920000
cg0265	ABC	ABC		360481		510096	642534		492836	251404	666235	610449	333167	446656	664236	364809
cg0269	conserved	conserved		203223		222446	159836			341415			151389		360301	366383
cg0280	conserved	conserved		5680000	10200000	7410000	3260000	11000000	3730000	8870000	8100000	3440000	4460000	13300000	2450000	3650000
cg0281	PUTATIVE	PUTATIVE		546033	939880		1970000	1690000		1140000	669064	1050000	452679	857202	2270000	3440000
cg0282	conserved	conserved		1970000000	1420000000	2730000000	1060000000	1620000000	1760000000	949000000	1350000000	984000000	2070000000	417000000	291000000	557000000
cg0295	conserved	conserved		314368	233561	239148	812968	225642	151482	359891	247866	190589	400743	221199	606470	247022
cg0297	Uncharacterized	Uncharacterized		68100000	38800000	74900000	29200000	131000000	64800000	192000000	24500000	156000000	28700000	18100000	10800000	11900000
cg0300	hypothetical	hypothetical		825250	1000000	859865	935445	1220000	965656	1230000	1130000	699682	688593	1030000	661365	1340000
cg0302	DNA	DNA		171812	787017	416670	102552	49400000	117497	119871	463950	282710	160827	524240	181819	125246
cg0317	hypothetical	hypothetical				19990,9		7835,48					22628,9			5498,86
cg0321	Na+/H+	Na+/H+		0	0	0	0	0	0	0	0	0	0	240201
cg0325	Na+/H+	Na+/H+		0	0	0	0	0	0	0	0	0	0	1650000	519179	1950000
cg0327	membrane	membrane		5106,94								5331,52	6689,14	6689,85		4735,87
cg0334	secreted	secreted			2020000		975141	1510000	939140		1830000	2550000		1240000	652970	1080000
cg0335	conserved	conserved		44000000	88200000	52100000	82900000	63000000	69100000	71900000	87800000	95700000	91000000	78600000	50600000	42400000
cg0338	CONSERVED	CONSERVED		275000000	375000000	408000000	265000000	376000000	167000000	214000000	207000000	228000000	450000000	250000000	102000000	144000000
cg0339	translation	translation		1990000	2730000	1140000	1930000	3820000	1950000	2840000	2230000	1550000	1840000	1640000	2200000	3050000
cg0343	PUTATIVE	PUTATIVE		3720000	3600000	2530000	6520000	3960000	4830000	5330000	5480000	7590000	2720000	6670000	7720000	3310000
cg0349	METALLO-BETA-LACTAMASE	METALLO-BETA-LACTAMASE		10400000	17000000	14900000	21800000	15500000	27800000	16100000	23600000	22000000	22700000	23200000	14400000	21200000
cg0350	TRANSCRIPTIONAL	TRANSCRIPTIONAL		11100000	19400000	16300000	12400000	18600000	10300000	13200000	25600000	13300000	24400000	6440000	8450000	14400000
cg0355	pyrophosphohydrolase	pyrophosphohydrolase		0	0	0	1320000	593993	1250000	610289	1150000	982756	2380000	942813	1110000	1360000
cg0358	hydrolase	hydrolase		853534	806033	706620	665639	503213	765072	582916	603726	955934	1440000	468002	600466	829228
cg0359	PUTATIVE	PUTATIVE		90100000	72200000	80200000	102000000	79900000	86400000	75200000	64100000	50100000	108000000	109000000	45600000	55000000
cg0360	putative	putative		27772	36508,9		33715,3	22311,8						14788,6	295614	11683,6
cg0378	putative	putative		170777		32001,5	86954,5			57320	62268,5				13726,4
cg0388	Zn-dependent	Zn-dependent		60300000	178000000	229000000	141000000	363000000	55000000	236000000	31000000	48800000	53600000	16600000	228000000	81100000
cg0389	short	short		7250000	6000000	5150000	4090000	3990000	5580000	4350000	3330000	8400000	9290000	4440000	5970000	4930000
cg0394	Glycosyl	Glycosyl		5950000	5380000	5450000	7070000	9760000	6160000	9930000	5920000	9730000	8360000	5180000	5600000	5960000
cg0395	hypothetical	hypothetical		630060	303753		391306	315063		406587	778705	923287	357226	453110	207034	516138
cg0396	Glycosyl	Glycosyl												180407	29324,9	33734,4
cg0399	hypothetical	hypothetical		7470000	7270000	7680000	5080000	27800000	24000000	79000000	16200000	18400000	13500000	8790000	4940000	2630000
cg0404	Nitroreductase	Nitroreductase		10100000	10100000	4320000	4690000	8630000	7230000	6660000	2380000	5170000	3420000	5020000	5880000	4560000
cg0405	cobalamin/Fe3+-siderophores	cobalamin/Fe3+-siderophores		9580000	9540000	15500000	19400000	34500000	24100000	49800000	21300000	47100000	18200000	26300000	22100000	9100000
cg0407	secreted	secreted			97147,4		73393,5	109924	81624,4		44406,3	68539,8	78031,4
cg0409	PROBABLE	PROBABLE					1080000	517576	1020000				875015	1120000	1510000	2900000
cg0410	PUTATIVE	PUTATIVE		3450000	4470000	4590000	4970000	3800000	5180000	3390000	3600000	3880000	3950000	4110000	3800000	4200000
cg0411	putative	putative						515097		374563	289418	1350000		142359
cg0416	secreted	secreted		2290000	3440000	3740000	5910000	2790000	2150000	1820000	4020000	4390000	7330000	2650000	1110000	2260000
cg0418	putative	putative		6580000	5640000	6460000	4930000	7000000	3110000	6180000	8350000	12700000	11800000	7750000	5990000	4240000
cg0419	glycosyltransferase	glycosyltransferase		803010	345925	322164	449117		165577	1530000	229773	440278	395752	416790	382698	382201
cg0424	PUTATIVE	PUTATIVE		6250000	3540000	3490000	4820000	3700000	1670000	3640000	8690000	9720000	4380000	6870000	2830000	6890000
cg0438	PUTATIVE	PUTATIVE		3200000	3380000	2530000	3390000	4530000	2480000	4370000	3790000	4250000	3180000	6690000	4500000	6600000
cg0439	PUTATIVE	PUTATIVE		113186	216437		187455	154570	125094	125559	368645	358837	430366	630525	84557,1	295109
cg0443	PUTATIVE	PUTATIVE		1050000	800574	494071	904222	464555	678595	759795	1050000	1110000	873605	762834	879372	777318
cg0444	transcriptional	transcriptional		4270000	5740000	6010000	3000000	4140000	2490000	3470000	1860000	2180000	7760000	2070000	2750000	3470000
cg0448	conserved	conserved		54092,8			21632,9	116997		152819	82042	74717	19210,5	227930	170887	132096
cg0450	conserved	conserved		25900000	16800000	12200000	9310000	10600000	10500000	10800000	11700000	10800000	9200000	38400000	13000000	9850000
cg0451	PUTATIVE	PUTATIVE		390291	699700	751493	553736	268460	411645	321415	581901	478467	394620	616085	427046	731834
cg0452	hypothetical	hypothetical		96600000	142000000	148000000	100000000	103000000	94500000	104000000	87700000	99900000	107000000	73400000	48500000	63500000
cg0454	TETR-FAMILY	TETR-FAMILY		0	0	0	187058	710666	525838	293137	0	0	0	136611	461619	357826
cg0463	conserved	conserved		717508	2620000	5280000	921460	1070000	7190000	1490000	1640000	1410000	2090000	1190000	1100000	1430000
cg0466	conserved	conserved		2630000	3100000	5070000	2050000	3420000	2990000	2640000	2700000	1700000	2600000	1870000	537468	2040000
cg0467	cobalamin/Fe3+-siderophores	cobalamin/Fe3+-siderophores		2180000	1870000	2980000	2940000	3430000	2390000	3290000	2740000	5520000	1730000	6880000	3290000	2080000
cg0470	conserved	conserved		1680000	1720000	2390000	3380000	2340000	2010000	1620000	3450000	2630000	2020000	3210000	2200000	1140000
cg0471	conserved	conserved		308069	154891	142010	93562,3	157620	102570	201143	277199	94434,2	297087	51424,1	64052,8	284482
cg0472	conserved	conserved		1570000	1350000	1070000	732238	2140000	914931	1560000	602368	533761	743629	544990	726950	2450000
cg0475	conserved	conserved		112000000	136000000	129000000	127000000	145000000	145000000	143000000	147000000	118000000	175000000	183000000	184000000	120000000
cg0477	hypothetical	hypothetical		1410000	2470000	4440000	1530000	1210000	2440000	1410000	2510000	1460000	3560000	1890000	2430000	549348
cg0481	PUTATIVE	PUTATIVE		950175	2470000	4240000	837505	1930000	2730000	3410000	3380000	2510000	2860000	399944	1620000	671777
cg0487	conserved	conserved		775586	1340000	833777	740198	1300000	1160000	663567	2160000	872553		268078	371766	783354
cg0489	hypothetical	hypothetical		6900000	10100000	8430000	7430000	7180000	5980000	6220000	3870000	6040000	6620000	2960000	4540000	4210000
cg0492	extremely	extremely		38200000	15500000	63300000	23200000	47000000	55100000	36800000	40500000	40500000	89100000	16900000	12300000	8960000
cg0496	Thiol-disulfide	Thiol-disulfide		18400000	17000000	28200000	16400000	37600000	19100000	22200000	27500000	28400000	28600000	15300000	43300000	24400000
cg0499	hypothetical	hypothetical					413036							874467
cg0500	Bacterial	Bacterial		244682	251206	599245	108839	77304,2	652536			235456	106077	538427	25946,5	260387
cg0502	phosphate	phosphate												3576,85	22009,6	3613,12
cg0505	putative	putative		7090000	9470000	15600000	8410000	7790000	11600000	9360000	5630000	7100000	10100000	4950000	3700000	4080000
cg0511	hypothetical	hypothetical					3130000								5910000
cg0513	hypothetical	hypothetical			401686		514681			218539		212162	840606	141269	1070000	186411
cg0515	PROBABLE	PROBABLE		423205	695239	427455	672743	342824	1460000	296443	646472	525293	1160000	1150000	306922	996707
cg0519	PUTATIVE	PUTATIVE		4610000	2650000	5030000	12000000	2420000	3420000	4900000	4530000	6160000	1630000	4360000	2020000	3590000
cg0523	membrane	membrane		93334,3		85359,1	333474	84503	64574,4		78229,5			189873	330530	130516
cg0527	PUTATIVE	PUTATIVE									118926	198788		185367	111786	318335
cg0528	putative	putative		4880000	14300000	10400000	10000000	5800000	10300000	7460000	5910000	5450000	6750000	7600000	4900000	3210000
cg0530	hypothetical	hypothetical		465647					1100000	1220000	1510000	1220000	276173	332076	2930000
cg0532	PUTATIVE	PUTATIVE		172589	434641	253662	318439				191931		162369		588992	181855
cg0536	PUTATIVE	PUTATIVE					56753,5				73354,8		79836,8	79823,3	144558	86444,5
cg0537	PUTATIVE	PUTATIVE		1220000	1820000	949004	1350000	1640000	771835	1420000	705007	1330000	636176	906697	1730000	1130000
cg0538	putative	putative		12300000	15000000	31600000	18100000	10600000	20300000	11600000	14600000	14500000	21400000	6590000	4310000	2820000
cg0540	PUTATIVE	PUTATIVE		826619	257370	371614	2800000	331681	1450000	884077	564567	884130	2770000	554939	1710000	1100000
cg0549	PUTATIVE	PUTATIVE			1090000	1120000	3620000	370397	789423	2870000	4060000	4900000	2120000			1540000
cg0550	putative	putative		1540000	625391	542682	487511	597888	317581	560693	777209	576770	725413	1180000	293018	533334
cg0553	conserved	conserved		14300000	3390000	5140000	18300000	3590000	16500000	4040000	13600000	4050000	3060000	2280000	3450000	21100000
cg0557	MONOOXYGENASE,	MONOOXYGENASE,		0	0	0	0	0	0	0	257198	337188	145929	298451	488541	144556
cg0565	PUTATIVE	PUTATIVE					8753,75				9121,01	10292,6
cg0568	Permease	Permease		0	0	0			866794		0	0	0	294564		313850
cg0570	PUTATIVE	PUTATIVE		302134	245323	305476	216536	237182	216285	234825	112058	112583	209505	295338	213845	328317
cg0571	hypothetical	hypothetical		648331		557391	2010000
cg0575	secreted	secreted		2510000	4800000	2910000	3290000	3550000	3650000	4050000	3820000	3480000	4400000	3110000	4870000	4380000
cg0579	transcriptional	transcriptional					20766,9		32113,1							53403,2
cg0580	conserved	conserved		6250000	7490000	13400000	3570000	5880000	4810000	3460000	5570000	6210000	5020000	2050000	2680000	2300000
cg0588	hypothetical	hypothetical		525709	1050000	2670000	1050000	2040000	1330000	2420000	1230000	1790000	984354	1860000	872842	1560000
cg0589	ABC	ABC												198523		887472
cg0607	hypothetical	hypothetical		3270000	8660000	11200000	3860000	5120000	3900000	8630000	3610000	8160000	6640000	1960000	3320000	7470000
cg0617	PUTATIVE	PUTATIVE				3130000							3890000	5550000
cg0620	secreted	secreted		12800000	10800000	15000000	3200000	18400000	14400000	6980000	12800000	21700000	28600000	9670000	6760000	13400000
cg0622	cobalt	cobalt		0	0	0	0	0	0	0	0	0	0	283656	230785	330326
cg0623	cobalt	cobalt		0	0	0	0	0	0	0	0	0	0	1490000	297025	195240
cg0624	secreted	secreted				1280000		2450000	1050000	850298	313008	1670000	313164		409213	1270000
cg0625	secreted	secreted		73200000	115000000	102000000	42100000	100000000	154000000	57300000	124000000	97100000	213000000	65900000	43200000	57100000
cg0646	Bacterial	Bacterial		753796	1850000	1280000	1640000	659454	923541	1400000	1260000	2370000	947558	1230000	987199	1100000
cg0650	secreted	secreted		39000000	53700000	70500000	57700000	60800000	52800000	40300000	58000000	65300000	88800000	33200000	110000000	36500000
cg0680	conserved	conserved		11200000	7600000	9380000	7850000	16000000	12500000	11400000	10900000	9950000	6370000	6630000	7920000	6760000
cg0682	ATPase	ATPase		7600000	9970000	6870000	7430000	6820000	7800000	5540000	4190000	5020000	7150000	6180000	3920000	3800000
cg0683	permease	permease		4510000	1680000	3540000	3700000	1330000	5780000	1820000	1540000	4650000	3620000	4520000	5980000	2250000
cg0685	homolog	homolog		494169	344661	131627	198253	219220	146482	266452	264093	124925	431796	360331	673935	58152,4
cg0686	ACETYLTRANSFERASE,	ACETYLTRANSFERASE,		0	0	0	0	0	0	0	0	0	0	379228	331456	205533
cg0688	conserved	conserved		2150000	4190000	2240000	1620000	1240000	1240000	2770000	1540000		2010000	2050000	1120000	1260000
cg0689	hypothetical	hypothetical		3750000	832757	646369	1510000	991799	2310000	2320000	1320000	1760000	3600000	701958	313141	477601
cg0697	conserved	conserved		24900000	22700000	28100000	18700000	19200000	25000000	14600000	21700000	17100000	16500000	18300000	16100000	10500000
cg0698	conserved	conserved		14500000	12000000	8450000	15000000	12900000	9000000	4920000	20700000	11200000	11200000	14900000	15800000	13600000
cg0704	conserved	conserved		22800000	18900000	20400000	15000000	33100000	30700000	16200000	20300000	15100000	22600000	25200000	21500000	5100000
cg0710	membrane	membrane						219308		265052
cg0715	secreted	secreted		522146	1650000	1190000	267846	528789	249281	238541	908788	1820000	1170000	531178	386536	987056
cg0716	conserved	conserved		1330000	1490000	1520000	904135	949107	1710000	1010000	840292	1140000	1120000	1060000	554627	1150000
cg0725	transcriptional	transcriptional		5010000	7370000	3470000	3480000	5860000	3830000	4360000	6040000	5120000	3840000	3900000	4200000	2510000
cg0726	secreted	secreted		39900000	25000000	33600000	28000000	35300000	41300000	23300000	56100000	46300000	55900000	65600000	18300000	19900000
cg0727	nucleoside-diphosphate-sugar	nucleoside-diphosphate-sugar		1550000	2560000	1150000	1990000	1560000	789090	1320000	1290000	1010000	1690000	1530000	1180000	2080000
cg0730	Glycosyl	Glycosyl		85261,6			26975,6				26810,9				42441,3	103014
cg0732	PUTATIVE	PUTATIVE		64205,9	118902	232671	203851	74793,9	163052	96821,3	119062	147671	176133	128404	71756,6	168165
cg0733	PUTATIVE	PUTATIVE		535224	686137	481886	676589	425060	492427	848596	474115	490975	614294	1020000	342195	1260000
cg0736	ABC-type	ABC-type		6200000	7850000	6650000	9630000	4590000	11100000	5880000	4170000	3750000	5240000	5280000	6090000	6410000
cg0737	ABC-type	ABC-type		175000000	413000000	337000000	118000000	482000000	296000000	366000000	436000000	320000000	101000000	402000000	264000000	211000000
cg0739	PUTATIVE	PUTATIVE		4050000	7100000	2990000	7810000	5570000	2700000	5320000	3160000	4850000	2320000	7420000	4640000	3610000
cg0740	membrane	membrane		833423	760609	880849	296640	690915	527720	701946	527724	525030	484259	385469	564754	1160000
cg0742	PUTATIVE	PUTATIVE		140014	67008,9		148644	161693	145848	103748	613184	563919	160147	679363	340641	737094
cg0745	protein	protein		1570000	1080000	846452	621383	1140000	517596	830393	333522	587342	598101	367612	557415	198246
cg0747	Cytidine	Cytidine		92603,7	149034	195408	154401	88700	103624	115330	160746	130177	178903	234483	258326	273595
cg0748	cobalamin/Fe3+-siderophores	cobalamin/Fe3+-siderophores		5270000	7680000	5420000	6380000	4950000	7270000	6800000	5670000	5980000	5580000	7400000	6020000	7050000
cg0752	PUTATIVE	PUTATIVE		46400000	47400000	39800000	60200000	53100000	42300000	48300000	28000000	44600000	30900000	26100000	24800000	30500000
cg0753	secreted	secreted		6690000	5020000	5320000	7680000	8300000	2700000	3500000	2800000	2960000	2890000	1950000	1930000	8750000
cg0757	conserved	conserved			590457					140641		593134		2120000
cg0764	PUTATIVE	PUTATIVE		478957	444561	368296	488756	384254	447186	281235	232769	666924	355701	308498	195080	180785
cg0765	secreted	secreted			978624	672347	1150000	1370000	1370000		1070000	1100000	713147	2610000	1740000	496479
cg0767	Siderophore-interacting	Siderophore-interacting		0	0	0	0	0	0	0	0	0	0	15414,8	12929,1	16793,4
cg0773	PUTATIVE	PUTATIVE		11300000	10800000	7830000	10700000	12800000	14500000	19100000	14000000	15400000	10300000	17500000	12200000	14200000
cg0776	ABC-type	ABC-type		3150000	2660000	1390000	1510000	5450000	3310000	4420000	3450000	3200000	1480000	1520000	1280000	1130000
cg0777	ABC-type	ABC-type			312198		144220	293906		214223		112064	200083	109931	200589	157977
cg0780	membrane	membrane		8100000	2790000	3810000	4170000	5250000	5690000	7310000	2440000	1910000	4170000	966880	3460000	3780000
cg0781	membrane	membrane		6090000	11900000	22400000	6750000	14900000	8230000	6580000	25100000	24200000	17400000	5470000	3120000	3210000
cg0783	conserved	conserved		26500000	79000000	40700000	31000000	64700000	38200000	63200000	51400000	38800000	51100000	33300000	38300000	23100000
cg0787	transcriptional	transcriptional		4950000	1490000	1860000	1300000	1250000	1450000	1270000	3290000	3820000	1070000	3250000	1040000	1270000
cg0799	conserved	conserved		305130	366751	374910		541369	369349	525950	287188		440732	143559	283931	501662
cg0800	TRANSCRIPTIONAL	TRANSCRIPTIONAL														62750,1
cg0801	hypothetical	hypothetical		1820000	740720	586393	225890	1490000	1870000	328833	1360000	2200000	583469	505855	183710	221157
cg0806	conserved	conserved		1790000	1220000	1100000	2210000	2380000	1850000	2180000	1210000	1470000	2290000	2060000	3370000	4290000
cg0807	conserved	conserved		15600000	26000000	17900000	34700000	13000000	19100000	12700000	20200000	24000000	21100000	12500000	14300000	14900000
cg0809	Nucleotide-binding	Nucleotide-binding		19100000	15400000	28700000	9470000	9810000	9580000	7380000	9720000	12100000	6210000	11600000	7610000	10400000
cg0810	conserved	conserved		37000000	43400000	39400000	26900000	30900000	62000000	22800000	51400000	33300000	68200000	32800000	14000000	15300000
cg0819	hypothetical	hypothetical					276496			367248	275709	293349		294083	206182	500625
cg0821	conserved	conserved		20063,5					45263,4	14137,3			13845		49671,2	29524,4
cg0822	conserved	conserved		71535,2	56279,3		104349	170610	56975,6	83788,3					58907,2	59814,1
cg0828	putative	putative		1340000	8020000	8340000	1170000			12662
cg0831	SUGAR	SUGAR								5013,49		11040,1			11722,2
cg0833	conserved	conserved			172879		122904	136130	180214	183310	175757	213303	99347,5	174095	144499	61165,5
cg0834	Bacterial	Bacterial		9520000	16700000	16800000	15200000	13800000	13000000	11200000	10800000	11200000	9080000	9010000	10100000	6490000
cg0838	helicase	helicase		2710000	5230000	7000000	4420000	7650000	5200000	4000000	4670000	4280000	6120000	4940000	6430000	7780000
cg0839	hypothetical	hypothetical			712211		603757	1260000	951377	856152	806989	1200000	866446	1650000	1410000	2950000
cg0840	conserved	conserved		38100000	25500000	24900000	25700000	14400000	20500000	10600000	55100000	25100000	16200000	25100000	8440000	10600000
cg0841	conserved	conserved		13000000	6660000	20600000	6230000	5650000	14600000	4430000	24400000	19400000	9110000	10600000	13100000	9560000
cg0842	PUTATIVE	PUTATIVE		1500000	1070000	999663	1280000	956517	1060000	1100000	1510000	1220000	804447	1290000	1320000	1240000
cg0843	helicase	helicase		2260000	3520000	2130000	927334	2080000	1130000	1520000	1730000	1280000	1250000	1280000	1110000	1660000
cg0844	Type	Type		4080000	3960000	3490000	1320000	2950000	3870000	2250000	4710000	1840000	6330000	1370000	1460000	3150000
cg0845	Superfamily	Superfamily		1180000	1350000	1020000	900466	758008	671315	1190000	723494	1070000	1010000	848842	1320000	818859
cg0847	putative	putative		2350000	2290000	4380000	2520000	3670000	2910000	2740000	6410000	5420000	2880000	2740000	4360000	3700000
cg0852	conserved	conserved		922852	2090000	1230000	1200000	1700000	1740000	1950000	1450000	1800000	1710000	1470000	1780000	1180000
cg0853	conserved	conserved		4970000	5200000	4530000	2510000	4350000	2980000	4520000	4300000	3640000	11800000	5880000	6730000	5810000
cg0855	conserved	conserved		10200000	23500000	6000000	9040000	10100000	6070000	6140000	7030000	5120000	12500000	6600000	4680000	9190000
cg0858	secreted	secreted		2110000	4630000	19300000	3760000	2200000	7000000	2040000	12700000	4460000	8760000	4230000	227513	1620000
cg0859	conserved	conserved		112000000	200000000	272000000	72000000	172000000	77300000	105000000	57500000	53000000	55700000	27100000	16400000	15500000
cg0865	secreted	secreted			286136	593825	512642		1670000	2970000	953916	934123	2400000	525591	890075	575491
cg0867	Ribosome-associated	Ribosome-associated		300000000	509000000	464000000	439000000	400000000	420000000	438000000	283000000	394000000	318000000	262000000	240000000	164000000
cg0870	Haloacid	Haloacid		12800000	10500000	8100000	10200000	7480000	10000000	7330000	15200000	16200000	15500000	10800000	4890000	8160000
cg0871	conserved	conserved		629000000	477000000	433000000	513000000	373000000	604000000	408000000	285000000	371000000	373000000	379000000	239000000	223000000
cg0872	putative	putative		232912	379511	429200	275892			201743	333586			254467	80043,4	127913
cg0874	Uncharacterized	Uncharacterized		4130000	5310000	6880000	4190000	3410000	3240000	5780000	3990000	5050000	3690000	5610000	4570000	6660000
cg0877	Putative	Putative		425554	240395	250988	144111	259914	312975	203893	265926	488174	444075	140493	313182	290919
cg0880	secreted	secreted		349751	528901	699973	224106	262625	209247	220588	214026	222270	966925	390294	191516	148495
cg0882	conserved	conserved		1140000000	960000000	1210000000	634000000	1100000000	912000000	686000000	776000000	901000000	1550000000	470000000	633000000	548000000
cg0883	conserved	conserved			7990000	8260000			13800000	12200000	5150000			4750000
cg0884	conserved	conserved		5500000	8940000	5930000	5550000	5730000	5890000	9990000	3640000	4730000	7240000	4530000	6480000	3160000
cg0885	HELICASE,	HELICASE,		416311	1010000	1240000	1200000	947413	628381	833214	994448	1470000	1130000	1410000	1000000	2550000
cg0886	PROBABLE	PROBABLE		3280000	1870000	2030000	1260000	1070000	1740000	1520000	3090000	3940000	2540000	3710000	3310000	4990000
cg0887	Kef-type	Kef-type		13800000	14300000	12700000	24500000	18800000	20100000	20300000	15300000	15100000	22100000	11800000	23700000	36900000
cg0888	NTP	NTP		391350	363170	503513		428633	263285	241393		188156	289079	216088		2310000
cg0889	PUTATIVE	PUTATIVE		297848	344384	362336	166983	156703	285765	274583	431281	753650	582460	752401	276620	345968
cg0891	metal-dependent	metal-dependent		0	0	0	0	0	0	0	0	0	0	310134	420115	1090000
cg0892	conserved	conserved		30700000	39100000	30600000	31500000	26200000	16900000	27900000	22000000	18500000	20200000	20300000	22600000	12300000
cg0893	secreted	secreted		3960000	10200000	4230000	10800000	6190000	10300000	3950000	4880000	14300000	5180000	3860000	5230000	3690000
cg0894	conserved	conserved				328034						133981			333678
cg0895	conserved	conserved		46900000	80500000	50600000	38800000	114000000	49800000	82000000	76500000	78200000	78200000	50600000	30100000	21200000
cg0896	membrane	membrane		12200000	15400000	11900000	11100000	11000000	8280000	10800000	8290000	8220000	9900000	7130000	13100000	7890000
cg0898	Pyridoxine	Pyridoxine		184000000	190000000	192000000	170000000	198000000	177000000	207000000	121000000	124000000	136000000	116000000	117000000	102000000
cg0901	secreted	secreted		5510000	5330000	2660000	1900000	8370000	6970000	4540000	5250000	4760000	4150000	5680000	5670000	7350000
cg0908	putative	putative		693865	116723	281467		126247		175671			1180000	419881	184343	114785
cg0910	Inositol	Inositol		3980000	5430000	4740000	7700000	4370000	4800000	5300000	12400000	13100000	6130000	14700000	7510000	4590000
cg0911	Inositol	Inositol		3390000	4380000	1280000	6060000	2660000	7000000	2460000	1190000	1280000	1580000	4060000	1990000	2240000
cg0918	PUTATIVE	PUTATIVE		163746	74165,1	103299	63005,8	45903	89293,8	91656,1	127750	48701,9	53910,1	122924	90924,9	40014,3
cg0922	ABC-type	ABC-type					360285			838217	432657		573831	284935	327709	363689
cg0924	ABC-type	ABC-type		43000000	67600000	137000000	60700000	50500000	84500000	46200000	58200000	65100000	46900000	55000000	66000000	70800000
cg0926	ABC-type	ABC-type		628428		492258	132291	311093	456248		230276	278064	146123	231993	1360000	2040000
cg0927	ABC-type	ABC-type					14400000						2460000			7400000
cg0928	ABC-type	ABC-type		2070000	1050000	861298	1780000	778276	709236	1340000	470866	588871	1020000	965403	2510000	1050000
cg0931	PROBABLE	PROBABLE		1200000	911994	1070000	2080000	819163	682397	1250000	949933	1710000	907895	1160000	1950000	1150000
cg0932	membrane	membrane		380210	121626	105642				568211		707620	728053		1030000	1630000
cg0933	DNA	DNA		496420	849446	618864	501991	1010000	442186	931014	1510000	576959	940067	1930000	626056	825050
cg0934	conserved	conserved		2970000	3350000	1510000	1950000	2720000	1900000	2130000	2350000	2610000	3480000	1770000	3820000	1260000
cg0935	conserved	conserved		579000000	970000000	1490000000	1270000000	1550000000	1420000000	885000000	2400000000	2970000000	2640000000	1480000000	414000000	443000000
cg0938	Cold	Cold		1730000	1050000	1830000	3000000	1870000	2150000	2460000	3870000	3000000	2350000	2790000	1480000	2720000
cg0940	GLUTAMINE	GLUTAMINE		838398	1490000	1260000	1130000	1810000	1750000	1180000	842071	1070000	1580000	1100000	1740000	1500000
cg0941	hypothetical	hypothetical		173505	194753		178955				367137	358635	667988		353950	702229
cg0945	23S	23S		3470000	4910000	4230000	6430000	14500000	3850000	20700000	3230000	4320000	15100000	5270000	6330000	4740000
cg0946	conserved	conserved		652063	855974	850352	537321	749793	497058	866894	453214	617597	444654	557052	587254	743276
cg0947	conserved	conserved		20900000	24100000	27700000	18100000	22600000	18500000	22200000	19600000	37700000	18800000	11300000	21000000	8750000
cg0952	PUTATIVE	PUTATIVE		6740000	8290000	10500000	6600000	8100000	4280000	5610000	8330000	12500000	3070000	6440000	4520000	11200000
cg0953	Na+/proline,	Na+/proline,		469897	657552	1290000	209563	373248	649437	419067	337723	410930	280765	667457	441468	1090000
cg0955	secreted	secreted		21200000	18800000	14600000	10600000	14400000	12800000	14100000	8120000	15500000	27400000	6530000	3700000	6340000
cg0961	alpha/beta	alpha/beta		3520000	1590000	2370000	3630000	1790000	2090000	1580000	1070000	1580000	1660000	1150000	2560000	1340000
cg0963	hypothetical	hypothetical		490000000	551000000	856000000	328000000	668000000	787000000	433000000	797000000	615000000	737000000	266000000	143000000	177000000
cg0964	Glutaredoxin	Glutaredoxin		19400000	14700000	25500000	10000000	28400000	20200000	28400000	29700000	22600000	8970000	18400000	4000000	5890000
cg0968	PUTATIVE	PUTATIVE		138270	131876	121655		92628,8		72071,9	121919	102898	97198,9	121766		153526
cg0970	membrane	membrane					86197						57417,1	45316,3		149159
cg0975	putative	putative		15600000	13000000	18000000	13400000	14700000	21600000	13300000	14800000	20300000	26100000	10000000	11100000	9930000
cg0978	ABC-type	ABC-type		838419	1390000	686082	2560000	691335	788107	670337	2100000	1390000	1530000	1270000	810780	1700000
cg0979	Transcriptional	Transcriptional			115013	127226	119104	64506,2		76764,7	116722	109107		118655	182810
cg0980	secreted	secreted		23700000	32600000	29200000	19900000	47900000	29600000	28100000	47700000	46300000	58300000	33600000	18500000	23100000
cg0987	conserved	conserved		737822	692772	712589	426245	1320000	703898	680424	1150000	668298	363460	689513	932823	430273
cg0998	Trypsin-like	Trypsin-like		7960000	6880000	12700000	10600000	8870000	7790000	5360000	47900000	45100000	22500000	35700000	7040000	6520000
cg0999	PUTATIVE	PUTATIVE		1170000	1890000	808046	3790000	1540000	1400000	1360000	1290000	1150000	1180000	1470000	2650000	1290000
cg1000	conserved	conserved		206670	354155			329765	446993	259159	162566	423689	215106	194355	108569	97322,9
cg1003	5-FORMYLTETRAHYDROFOLATE	5-FORMYLTETRAHYDROFOLATE		0	0	0	0	0	0	0	0	0	0	557366	587672	193350
cg1006	Acetyltransferase	Acetyltransferase					1130000		786594	1280000	570536	2890000	916572	1130000	1200000	3680000
cg1007	putative	putative		831817	2930000	1890000	2210000	2220000	2670000	1550000	3040000	3010000	1910000	3800000	5880000	4080000
cg1010	putative	putative		469706		178576	161500	1570000	235741	70267	582572	116172	147817	311349	168383	337030
cg1012	CYCLOMALTODEXTRINASE	CYCLOMALTODEXTRINASE		728382	794961	871812	528573	1600000	685800	1060000	0	0	0	2070000	1050000	1990000
cg1015	Uroporphyrin-III	Uroporphyrin-III		0	0	0		1400000	401288	1590000	775107	1150000	778067	884317	615613	1390000
cg1018	PROBABLE	PROBABLE			245538	204988		110264	76092,7	77997,1	252882	246721	276522	208380	120668	153136
cg1032	Bacterial	Bacterial						792117	614628	348784	553280	938359	354863	287290
cg1037	putative	putative				1480000	201654	970674	535207	473766	1270000	1080000	794048	467625		808337
cg1039	PUTATIVE	PUTATIVE		1610000	1820000	1410000	1740000	1140000	1850000	1250000	1450000	1770000	1970000	1690000	1600000	1860000
cg1040	ATPase	ATPase		3190000	1980000	2400000	3490000	2090000	5890000	2020000	5520000	4890000	5660000	3900000	2830000	3490000
cg1043	Thiol-disulfide	Thiol-disulfide		4500000	12600000	18800000	13800000	10300000	12500000	10400000	5890000	5890000	13200000	6260000	4440000	2670000
cg1044	conserved	conserved		12800000	9770000	10100000	4200000	17600000	10100000	8680000	10400000	11900000	14800000	6940000	9420000	8400000
cg1045	conserved	conserved		6130000	7840000	7060000	10500000	8010000	9020000	5070000	5360000	7130000	7180000	2820000	2060000	4430000
cg1048	Haloacid	Haloacid		26542,1	33518	43757,6	40258,5	18356,5	26205,3	16319,9	22941		25311,2	430287	205384
cg1049	Enoyl-CoA	Enoyl-CoA		3800000	1900000	2000000	6690000	1790000	2320000	2000000	0	0	0	1300000	4170000	1470000
cg1051	hypothetical	hypothetical					698727	818916	222736	1380000	108731	64691,6		124548	1250000	634478
cg1053	PUTATIVE	PUTATIVE		101087			19240,8		48511,3		46767,5		28552,3		66957,9	90862,6
cg1068	PROBABLE	PROBABLE		249350	287461	301065	293173		321401	495559			187220	116970	381729	354109
cg1070	conserved	conserved		4670000	3380000	4930000	2710000	8030000	3070000	3890000	4910000	2700000	2480000	4570000	4310000	1220000
cg1073	Predicted	Predicted		1470000	2260000	935040	971535	1650000	1310000	1550000	1490000	1180000	3510000	944235	1310000	2640000
cg1074	conserved	conserved		244902	736190	631191	174268	295548	196627	215403	288378	245044	145446	295790	423766	869209
cg1080	Putative	Putative		1650000	1440000	1350000	1470000	1460000	1610000	1370000	1040000	1250000	912857	1580000	843128	1190000
cg1081	ABC-type	ABC-type		704999		161420	160549	252870		261608	557978	103871	299476		140369	374556
cg1086	putative	putative		140671	159641		84971,5	66806,4		87595					159624	76812,6
cg1088	ABC-type	ABC-type												29945,5
cg1091	hypothetical	hypothetical					426802					412713		158372
cg1092	putative	putative		980985	1360000	2120000	870137	2240000	951134	1370000	2100000	1310000	2530000	597427	1370000	1480000
cg1098	Bacterial	Bacterial		2620000	6820000	1810000	2990000	2840000	2610000	2180000	6500000	4020000	4840000	5390000	2950000	6270000
cg1100	ABC	ABC		205082	206921	97169,2		198335	84149,7	79101,7	125146	51864,8	45732,2	45344,3	78478	126588
cg1101	ABC-type	ABC-type		529924	359525	313224	137085	199700		90864,6	731482		967066	562445	337408	180846
cg1106	hypothetical	hypothetical		232000000	317000000	336000000	225000000	262000000	219000000	147000000	315000000	205000000	337000000	145000000	70800000	114000000
cg1110	conserved	conserved		379196	399223	200973	142717	395603	429321	236698	693448	642977	240809	485445	474345	603720
cg1112	Septum	Septum		5170000	8600000	3340000	2640000	3850000	4390000	3860000	1330000	2500000	3880000	2270000	7430000	921787
cg1113	conserved	conserved		13300000	13300000	13500000	13100000	18600000	11400000	14100000	10700000	29300000	9150000	9230000	14800000	10600000
cg1121	Permease	Permease		0	0	0	2870000	8960000	5000000	9810000	0	0	0	3300000	5090000	6920000
cg1125	conserved	conserved		5260000	2210000	2660000	1580000	3910000	2520000	1620000	4430000	3000000	1820000	2880000	843378	538918
cg1127	Uncharacterized	Uncharacterized		5970000	6590000	3780000	5580000	5660000	4360000	6620000	11600000	13500000	5360000	8070000	6500000	5460000
cg1128	similar	similar		4170000	7760000	3460000	5230000	4180000	4840000	8770000	7830000	4630000	3640000	4060000	5520000	4450000
cg1131	conserved	conserved		3290000	3330000	3790000	4810000	6300000	5670000	3590000	3890000	3730000	4260000	4560000	6000000	4230000
cg1136	conserved	conserved		22000000	69300000	38900000	26100000	103000000	24400000	85500000	56700000	82100000	68400000	42300000	31500000	33200000
cg1138	PROBABLE	PROBABLE			1560000	941444	1270000	1630000	1790000	1250000	2350000	2160000	2340000	2320000	1210000	1400000
cg1139	Allophanate	Allophanate		7360000	5410000	11500000	3620000	10800000	3800000	16100000	1860000	1770000	4640000	3250000	6850000	6990000
cg1141	homolog	homolog		3640000	6850000	9600000	5870000	4510000	3980000	4850000	4320000	5160000	9840000	3510000	4490000	5750000
cg1142	Na+/proline,	Na+/proline,		9300000	17100000	24000000	17700000	17000000	5410000	9140000	6270000	6090000	53900000	3310000	3920000	20700000
cg1143	PUTATIVE	PUTATIVE											829326		25406,4	25253,8
cg1144	hypothetical	hypothetical		4230000	4080000	7550000	5190000	12600000	6370000	10600000	4780000	6620000	9390000	5940000	5280000	4370000
cg1150	NADPH-dependent	NADPH-dependent					275600		517998		626453		315748	858523	2250000	868203
cg1158	putative	putative		2940000	1980000	1690000	2580000	2240000	3440000	1800000	3250000	4090000	3450000	1400000	1670000	2040000
cg1165	Gamma-aminobutyrate	Gamma-aminobutyrate		338746	1130000	746044	1210000	795435	407115	534355	983405	1410000	1740000	660007	1210000	1370000
cg1166	putative	putative		76861,6	94112,1	209288	303427	95736,7	136643	139749	138489	102754	141470	131038	68944,6	276261
cg1167	putative	putative		170203	302106		209742	966352	331943	839699	212528	474765		1440000	176888
cg1171	Predicted	Predicted		26400000	28000000	27800000	25100000	31900000	47200000	30000000	33100000	43300000	38500000	35600000	51400000	46100000
cg1172	conserved	conserved			7342,25	17437,2					6520,83	7158,29		7837,31
cg1182	putative	putative		152158	139983		280470		131042	100853	131668	127148	71355,3	172064	124964	141877
cg1190	hypothetical	hypothetical		6040000	5750000	10900000	14100000	4910000	6350000		9710000	1660000	5000000	7920000	4440000
cg1191	hypothetical	hypothetical		102731	122244	62937,1	110847		68912,8	55463			38504,1	22533,1	35038,8	28895,4
cg1202	conserved	conserved		1090000	2610000	1330000	1620000	1150000	2020000	2680000	1270000	1810000	1690000	588466	1050000	651362
cg1203	Mg-chelatase	Mg-chelatase		13100000	11700000	13800000	16400000	6800000	9140000	12200000	5540000	5990000	6990000	5870000	20000000	8590000
cg1204	similarity	similarity		478792	478566	479646	490515	441774	288206	449373	214127	173434	399149	191596	450930	999595
cg1206	PEP	PEP		98900000	128000000	137000000	147000000	112000000	138000000	113000000	109000000	91700000	100000000	95400000	103000000	62300000
cg1207	ATPase	ATPase		4670000	1740000	1190000	1590000	1460000	1720000	1920000	2440000	1170000	575830	2980000	2770000	1760000
cg1211	PUTATIVE	PUTATIVE		1680000	2470000	2760000	1980000	1240000	2470000	2890000	756474	1110000	3770000	979944	1010000	1650000
cg1220	Predicted	Predicted		3600000	2880000	3390000	4430000	1420000	4670000	1910000	10300000	7760000	3010000	5940000	2610000	4210000
cg1228	ABC-type	ABC-type		201289				344698			243352	95302,8	247224	64856,4	809746	1010000
cg1234	putative	putative		1820000	1610000	1100000	1970000	1050000	942018	1490000	1820000	1650000	1910000	1510000	1250000	1930000
cg1238	putative	putative		3620000	14500000	6640000	12100000	8750000	3500000	3450000	12200000	9720000	4000000	4960000	9150000	8830000
cg1239	SIMILAR	SIMILAR		1020000	982175	969578	1440000	788850	524603	1180000	380102	2140000	469798	520331	603037	1440000
cg1240	hypothetical	hypothetical		8080000	9270000	6430000	10000000	16000000	7120000	7400000	10600000	9430000	12700000	6130000	11400000	6270000
cg1243	secreted	secreted		7300000	5140000	7900000	3600000	6480000	6700000	4370000	7190000	5330000	5960000	3330000	2250000	4870000
cg1244	Arsenate	Arsenate		18200000	15900000	12900000	12400000	12900000	20800000	8350000	10200000	14700000	23600000	16900000	6010000	12600000
cg1246	conserved	conserved		3570000	2380000	3100000	3810000	2300000	2970000	3730000	2930000	3380000	1970000	2630000	2350000	2900000
cg1247	putative	putative		2760000	35900000	1940000	17500000	74800000	11500000	27700000	2770000	3450000	2640000	2650000	17600000	5370000
cg1248	GTPase	GTPase		33500000	24700000	28300000	41700000	29900000	27100000	32300000	28700000	25500000	21600000	47700000	33900000	24300000
cg1249	ABC-type	ABC-type		27700000	17900000	19700000	9850000	16000000	15700000	14900000	10300000	16800000	22200000	8180000	9230000	16700000
cg1250	Uncharacterized	Uncharacterized		1450000	1240000	1060000	2360000	1450000	2320000	1380000	1560000	2430000	1570000	2340000	1070000	1420000
cg1261	Lysine	Lysine		5730000	4540000	5520000	6000000	4260000	6270000	4460000	5140000	3700000	4160000	3490000	3630000	4660000
cg1263	Glycosyltransferase	Glycosyltransferase		51470,1	36167,2	41176,1	0	0	0	0	0	0	0	0	0	0
cg1264	conserved	conserved			14655	16487	18683,2		12160,9			15878,9			20210,7
cg1265	conserved	conserved		227000000	211000000	420000000	140000000	225000000	304000000	119000000	203000000	175000000	425000000	85700000	61300000	110000000
cg1267	Beta-fructosidase	Beta-fructosidase		1210000	721618	2470000	0	0	0	0	0	0	0	513020	440853	2570000
cg1270	PROBABLE	PROBABLE		81400000	41100000	66500000	41500000	50000000	45400000	48900000	54200000	47100000	47900000	46900000	25700000	33700000
cg1272	conserved	conserved		885169	1120000	554805	395543		754660	510664	1450000	2310000	1100000	993052	858318	890227
cg1273	conserved	conserved		27700000	28100000	58300000	19900000	17900000	29800000	14300000	14900000	19800000	39400000	20600000	10200000	30800000
cg1275	conserved	conserved		621785	1340000	1070000	501384	877686	995590	951008	394845	321080	580028	326081	769252	393416
cg1277	conserved	conserved		4230000	3070000	4860000	12000000	3100000	2480000	3090000	7910000	1130000	6770000	4690000	2700000	5990000
cg1278	conserved	conserved		3580000	2560000	6130000	2740000	3200000	5530000	2040000	2770000	3790000	2090000	2190000	6440000	5550000
cg1279	putative	putative			103275			97504,6		77773	6385,63			5464,05		4386,2
cg1282	conserved	conserved		342140	457412	667168	676133	724302	332323	495632	539560	502763	275745	374002	304739	707245
cg1285	conserved	conserved		214663	516209	96165,7	429449	182605	224438	324292	223325	243415	258267		350099	182376
cg1286	conserved	conserved		25500000	18900000	34700000	14500000	25100000	25200000	13600000	20600000	24800000	11700000	7330000	6160000	10800000
cg1292	FLAVIN-CONTAINING	FLAVIN-CONTAINING		0	0	0	0	0	0	0	0	0	0	1110000	1280000	840303
cg1295	Predicted	Predicted		2140000	657795	784713	763435	407828	474631	402790	847231	453387	508337	896195	449835	640359
cg1302	Predicted	Predicted			72536,9		56168,9			16753,3			47508,6	116115	98552,7	78773,8
cg1303	NTP	NTP		769306	1110000	1120000	667827	634672	616433	1440000	316837	215795	654478	553474	260742	279843
cg1304	putative	putative										109368	42965,7			20499,1
cg1305	Amino	Amino		0	0	0	0	0	0	0	0	0	0	1220000	628038	979987
cg1307	Superfamily	Superfamily		296000000	322000000	265000000	401000000	342000000	436000000	392000000	297000000	356000000	282000000	247000000	246000000	231000000
cg1308	Bacterial	Bacterial		3100000	1140000	1130000	1840000	2240000	3030000	3620000	2260000	3460000	1580000	1840000	839757	1470000
cg1316	Superfamily	Superfamily			33021,2	110736	38035,4		44166,9	69473,4	47029,3	49952,9		32085,3	81192,9	38737,1
cg1317	putative	putative		3490000	1750000	2070000	2330000	1660000	2790000	2030000	1590000	2640000	2030000	2110000	4230000	4260000
cg1318	DNA	DNA		311326	448993		459678	253109	285423	404205	520736	519244	679445	691983	679942	457638
cg1319	ATPase	ATPase		101508	97371,3		6910000			9520000	129549		4320000	844847	11600000	5980000
cg1322	conserved	conserved		9400000	14000000	17900000	10300000	7680000	10300000	10300000	5400000	7380000	7190000	7160000	14200000	10300000
cg1324	PUTATIVE	PUTATIVE		6260000	4850000	10800000	7840000	7120000	9080000	3370000	4020000	5870000	5360000	4370000	2960000	4610000
cg1326	hypothetical	hypothetical		3910000	1620000	2010000	1570000	1700000	3130000	2200000	3150000	3740000	2300000	2670000	2580000	2780000
cg1327	Bacterial	Bacterial					49040,9	19442,4	33773	24360,1	25060,8	31557,5	270596		23686,9	64745,8
cg1328	putative	putative		38000000	57000000	69100000	26200000	61400000	56100000	24500000	48800000	34900000	46200000	21500000	15100000	15100000
cg1332	PUTATIVE	PUTATIVE		741218	1460000	1460000	508275	2850000	1590000	943649	1510000	1480000	2440000	673186	580873	1200000
cg1340	conserved	conserved		5920000	4610000	4400000	1670000	6160000	960793	2460000	709469	914572	893654	784793	2910000	4510000
cg1347	secreted	secreted				153826		165375	85824,4	176023	119221	90227,3	74215,4	82231,5	71207,5	134666
cg1349	membrane	membrane		15493		32837,7		56093,4		34992,4		37546,5	5601,76		4320,96	9147,99
cg1356	Predicted	Predicted		2020000	2360000	2470000	2010000	1750000	1510000	1950000	1970000	959002	2230000	1110000	1370000	780997
cg1358	Putative	Putative		16300000	9640000	9990000	7450000	9190000	12500000	13600000	6840000	7320000	10900000	7270000	12200000	13700000
cg1370	conserved	conserved		7300000	9330000	5900000	7690000	10300000	16500000	11100000	10100000	9460000	4810000	7160000	4990000	3510000
cg1371	Predicted	Predicted		1050000	1770000	2480000	4490000	1490000	2710000	1050000	2620000	1950000	2100000	5310000	3550000	2500000
cg1373	Glyoxalase/Bleomycin	Glyoxalase/Bleomycin		83600000	135000000	117000000	99100000	122000000	146000000	92800000	118000000	138000000	157000000	59400000	48000000	76100000
cg1374	conserved	conserved		18900000	19800000	15700000	4630000	25700000	16800000	19000000	5590000	14300000	3450000	18200000	2430000	1380000
cg1375	PUTATIVE	PUTATIVE		3630000	5780000	2630000	4000000	3910000	5110000	3860000	3130000	2930000	3270000	5340000	3430000	2270000
cg1383	ABC-type	ABC-type		33000000	61900000	51200000	28200000	40500000	39300000	40500000	30000000	27200000	25700000	20500000	17200000	30100000
cg1384	putative	putative		3080000	3890000	3400000	2150000	3290000	2860000	3310000	3300000	2280000	3260000	2480000	2340000	2220000
cg1385	SAM-dependent	SAM-dependent			476146	396111	360463	613601	376129	356034	436312	519011	723034	487122	393328	767337
cg1392	TRANSCRIPTIONAL	TRANSCRIPTIONAL		1930000	2230000	7400000	2420000	1470000	4220000	1030000	1480000	1100000	4120000	1110000	592284	1800000
cg1393	Acetyltransferase,	Acetyltransferase,							1620000		1350000	882938	1720000			1400000
cg1394	putative	putative		1160000	608007	437544	368442	635070	1550000	996774	1060000	412728	809313	1260000	562772	857057
cg1395	conserved	conserved		8830000	8290000	6580000	4880000	11400000	6720000	12300000	5020000	6780000	4080000	6750000	7000000	12000000
cg1396	hypothetical	hypothetical			104793		36717,6	32594,6	56995,2		62829,8	73945,7	75679,6	58391	71195,5	26439,6
cg1397	TRNA-METHYLTRANSFERASE	TRNA-METHYLTRANSFERASE		935106	411587	604965	515886	862568	822958	564873	1250000	1120000	1000000	1800000	610657	2180000
cg1398	conserved	conserved		3360000	3350000	2180000	4240000	2260000	4090000	3210000	4330000	4520000	4360000	2800000	2670000	2940000
cg1400	putative	putative		1680000	1570000	1670000	1230000	1540000	1640000	1290000	1820000	1290000	1290000	1560000	1950000	3510000
cg1402	conserved	conserved		48300000	136000000	75200000	92200000	84800000	73500000	82400000	106000000	122000000	68200000	74700000	88300000	53700000
cg1408	putative	putative		199232	321850		291744				1470000	1980000		1520000	219120
cg1410	LACI-FAMILY	LACI-FAMILY		15600000	22200000	23000000	20300000	13400000	15600000	19700000	14900000	18700000	13900000	10800000	12800000	9560000
cg1411	ABC-type	ABC-type		3260000	3850000	3330000	4000000	1970000	2840000	3140000	5160000	2770000	2520000	2740000	1480000	2450000
cg1413	secreted	secreted		230000000	267000000	222000000	174000000	281000000	250000000	249000000	180000000	135000000	190000000	92900000	106000000	100000000
cg1414	Uncharacterized	Uncharacterized		11700000	27000000	11200000	15900000	15900000	4520000	14300000	7110000	7540000	7320000	4610000	14800000	4870000
cg1417	Acetyltransferase	Acetyltransferase		895989	880710	637021	652546	449390	556192	740056	1010000	980101	934352	1110000	1920000	749241
cg1418	ABC-type	ABC-type		10500000	34200000	13100000	15000000	14600000	20800000	8850000	9370000	8650000	13400000	14500000	6110000	8940000
cg1421	putative	putative		4650000	3340000	3230000	2640000	2770000	1500000	5920000	4870000	6960000	543754	4040000	4010000	1910000
cg1423	putative	putative		23700000	28700000	27400000	27000000	27800000	26200000	24900000	21500000	17200000	27200000	16700000	13100000	16100000
cg1426	PUTATIVE	PUTATIVE		1460000	2140000	2480000	2500000	2800000	1850000	2990000	1190000	1510000	2040000	1330000	1900000	2850000
cg1427	extracellular	extracellular		0	0	0	0	0	0	0	3040000	4910000	3280000	2000000	4890000	6090000
cg1429	putative	putative		5150000	7740000	3360000	23100000	10300000	4630000	5750000	11000000	9260000	9040000	4480000	7760000	5160000
cg1433	conserved	conserved		1980000	2990000	1890000	8420000	1490000	1810000	1140000	1360000	1760000	3920000	1490000	12800000	3040000
cg1444	putative	putative		174247	283835	85859,2	269166	123136	180498	161935	134460	180807	117980	411729	273620	308490
cg1448	conserved	conserved		11900000	7290000	14800000	7640000	7170000	9330000	9080000	5750000	5930000	13200000	6520000	6600000	8230000
cg1449	conserved	conserved		8170000	8420000	10700000	11500000	10100000	8500000	8410000	7300000	7110000	5190000	6500000	11100000	8000000
cg1452	hypothetical	hypothetical		9450000	6580000	5570000	1780000	6430000	4560000	5440000	7280000	8870000	1660000	5900000	1970000	1270000
cg1454	PUTATIVE	PUTATIVE		227844	708465	611850	1330000	394696	541369	338477	373574		845570	485425	354486
cg1456	Predicted	Predicted		3700000	4580000	5140000	2450000	3390000	3820000	3190000	3870000	3310000	3980000	1910000	1320000	2390000
cg1458	2-HYDROXYHEPTA-2,4-DIENE-1,7-DIOATE	2-HYDROXYHEPTA-2,4-DIENE-1,7-DIOATE		14100000	9900000	7370000	15300000	12900000	9750000	8240000	11800000	12300000	23400000	12500000	22500000	32800000
cg1459	SAM-dependent	SAM-dependent		2220000	5430000	1680000	3120000	2190000	1060000	1820000	1690000	3570000	1260000	1320000	2550000	3490000
cg1474	putative	putative		1250000	677421	862366	1040000	2170000	554850	1120000	1330000	204639	355644	1140000	177015	173035
cg1486	Bacterial	Bacterial		2160000	914756	1270000	1760000	1710000	1530000	2420000	1470000	910479	1560000	2190000	1620000	1830000
cg1490	NTP	NTP		2580000	2720000	4090000	3050000	3220000	2220000	2500000	3130000	2220000	3730000	4440000	2720000	4160000
cg1494	putative	putative		123271	151705	187210	158122	86891		160117	62999,4	67398,3	101593	63712,4	67938,3	51527,6
cg1497	Predicted	Predicted		387287	455138	146882	235955	364424	154745	546250	207086	178030	687752	287371	238349	619152
cg1498	RecG-like	RecG-like		0	0	0	0	0	0	0	0	0	0	63263,2	259368	657662
cg1499	similarity	similarity							16700000		20600000	24200000				28300000
cg1500	N6-adenine-specific	N6-adenine-specific		19600000	25900000	27300000	16900000	20700000	21500000	31000000	17000000	20000000	18000000	15700000	21200000	14300000
cg1502	ABC-type	ABC-type		4640000	5720000	2540000	1340000	4700000	9990000	3830000	3670000	2280000	2610000	4740000	6260000	4690000
cg1503	ABC-type	ABC-type		2660000	2620000	3980000	1400000	1660000	1860000	2880000	714195	541573	3370000	2100000	6060000	3610000
cg1504	ABC-type	ABC-type		2510000	959568	690385	1580000	1270000	1040000	1190000	784922	1000000	1260000	748799	2410000	3240000
cg1505	putative	putative		8440000	5870000	5600000	3010000	8520000	4800000	5910000	3340000	3430000	3400000	3260000	2260000	4360000
cg1506	putative	putative			436978		583230								1130000
cg1514	secreted	secreted		64100000	48600000	93900000	29400000	59100000	40300000	23700000	66000000	65100000	95100000	26800000	9680000	12800000
cg1527	hypothetical	hypothetical			414568		365933	244684	163311	191692	338010	346725	63088,6	290381	276496	175670
cg1538	Dephospho-CoA	Dephospho-CoA		73900000	107000000	116000000	56500000	104000000	75100000	109000000	49400000	41600000	78100000	33100000	46600000	29700000
cg1548	conserved	conserved		520832	363436		1220000		517259			287387	607921		681944	537540
cg1552	Predicted	Predicted		259135	101033	182649	144243	80453,9	195529	120160	179131	360693	230391	230773	347814	174349
cg1553	Predicted	Predicted		6620000	7770000	6280000	6080000	8400000	7300000	7430000	3670000	6430000	3860000	2990000	8930000	2720000
cg1555	Superfamily	Superfamily		2190000	1380000	1530000	1400000	1180000	2350000	1180000	2200000	4210000	1550000	1590000	1170000	1190000
cg1556	conserved	conserved		92200000	170000000	83400000	123000000	122000000	89800000	150000000	93200000	128000000	104000000	87000000	74100000	45600000
cg1559	Zn-dependent	Zn-dependent		23400000	21600000	27900000	15000000	16000000	19700000	12700000	13500000	15500000	22700000	11900000	8200000	11600000
cg1562	putative	putative		723882		930335	797898		3520000	1020000	3570000	4510000		6160000	658170	1490000
cg1567	hypothetical	hypothetical					950615	448546	1050000	1830000	1210000	1800000	3670000	1620000	4120000	706893
cg1577	putative	putative		155000000	175000000	228000000	167000000	231000000	289000000	134000000	278000000	192000000	262000000	132000000	74800000	125000000
cg1578	Acyltransferase	Acyltransferase		0	0	0	0	0	0	0	0	0	0	1050000	396765	1410000
cg1589	putative	putative		1830000	1980000	3300000	1870000	2280000	1860000	1850000	2460000	1490000	1850000	1240000	1420000	821873
cg1590	secreted	secreted		8390000	9250000	8700000	6790000	8490000	10700000	7960000	9530000	12100000	25600000	4150000	10500000	1860000
cg1591	putative	putative		3990000	6550000	4400000	6880000	8640000	8120000	8380000	2240000	4530000	5250000	2040000	6760000	8260000
cg1592	conserved	conserved		58100000	86400000	90000000	33600000	64400000	70500000	38800000	94700000	70200000	73100000	43300000	75200000	71600000
cg1597	conserved	conserved		6460000	6850000	6790000	12100000	6540000	7580000	6430000	5800000	8770000	5200000	7470000	8200000	7370000
cg1598	sugar	sugar		6670000	8460000	7840000	7210000	14100000	11000000	10600000	15700000	13400000	6240000	10300000	8300000	6700000
cg1599	hypothetical	hypothetical		3580000	8220000	6360000	3870000	7410000	7870000	3000000	7830000	7830000	8430000	6170000	2080000	3530000
cg1600	Predicted	Predicted		1870000	1940000	1580000	3740000	2310000	1640000	2200000	2460000	2110000	2430000	2050000	1860000	4040000
cg1603	CONSERVED	CONSERVED		26800000	25600000	29400000	17500000	26500000	24600000	15400000	21300000	19400000	23200000	12400000	13600000	13600000
cg1604	putative	putative		17800000	19300000	16300000	14000000	8520000	12100000	12300000	8780000	8980000	12800000	4300000	7660000	5180000
cg1607	NTP	NTP		136598		185120	84714	117315	171974			212070		210549	553521	146354
cg1612	Acetyltransferase	Acetyltransferase		91900000	176000000	123000000	143000000	171000000	134000000	189000000	77200000	130000000	104000000	76400000	94100000	37100000
cg1614	CONSERVED	CONSERVED		549848	608883	581193	658315	720913	560416	879419	507151	866171	1170000	622535	2630000	765453
cg1615	16S	16S		4880000	7320000	6810000	8200000	5590000	9450000	8110000	7880000	11900000	7160000	11300000	12000000	7810000
cg1617	GTPase	GTPase		11300000	8060000	8080000	19900000	10000000	11300000	13800000	19900000	17300000	15700000	22100000	15700000	21500000
cg1618	conserved	conserved		113199	216305	124826	288986	59199,5	89821,6	503617	359112	450738	235919	310554	130207	422453
cg1619	putative	putative		408999	262995	418539	213630			122420	249160	224939		91317,1	85382,1
cg1620	SAM-dependent	SAM-dependent					224528							869136	98246,6	56161,3
cg1622	ABC-type	ABC-type				684191										652690
cg1626	conserved	conserved		12800000	36300000	96500000	18100000	73500000	71000000	53900000	45000000	12700000	15300000	44700000	4250000	7700000
cg1628	Hydrolase	Hydrolase		0	0	0	0	0	0	0	86396,1	61877,2	106094	117253	797139	703664
cg1630	PUTATIVE	PUTATIVE		178000000	161000000	220000000	82300000	178000000	147000000	156000000	113000000	156000000	170000000	98100000	89800000	104000000
cg1631	hypothetical	hypothetical		6900000	7130000	8440000	10500000	8450000	13900000	15000000	14200000	9960000	13300000	3840000	5850000	4560000
cg1632	conserved	conserved			23285,2	32164,9	40410,6		17273,2		35497,8	40091,8	43816,8	46868,1
cg1633	Predicted	Predicted					18329,7				22552,7		12457,9	25429,3	12874,5
cg1635	putative	putative		43577,8	68481,7	14266,9	36459,2	94113,1	58518	56073,8	50445,7	65522,9		71432,4
cg1636	putative	putative		52600000	67800000	58000000	43900000	47000000	64700000	32800000	59700000	71500000	44200000	40200000	22800000	38700000
cg1638	conserved	conserved		3390000		2970000	5120000	4940000	4090000	4420000	9420000	9170000	6610000	9840000	6040000	5670000
cg1639	membrane	membrane		2350000	1040000	1660000	3010000	725633	1160000	447962	2550000	1820000	691150	2960000	854476	2020000
cg1640	membrane	membrane		556211	404890	269269	324094	178495	243952	410925	661200	216007	166166	164583	193831	292638
cg1641	Superfamily	Superfamily		6070000	9040000	11700000	8940000	8430000	9800000	10100000	8850000	6740000	5060000	7550000	11000000	6310000
cg1644	Uncharacterized	Uncharacterized		6330000	7650000	6380000	1830000	6080000	6150000	6370000	3670000	4590000	2460000	3410000	9020000	2370000
cg1645	SAM-dependent	SAM-dependent		15300000	9720000	9970000	19400000	13500000	9430000	9840000	18800000	10900000	19500000	9240000	10500000	10200000
cg1648	transcriptional	transcriptional		1570000		590787	1030000	271740	333541	335688			454127		801511	2160000
cg1663	conserved	conserved		183601		191025	176393		225621	119662	278023		275810	221376	149816	296424
cg1669	putative	putative		6920000	6600000	6240000	10600000	14000000	11200000	7450000	13300000	7630000	7540000	8060000	7340000	6410000
cg1670	conserved	conserved									20348,5	20884,9	36791,1	7026,83		17530
cg1671	putative	putative		41800000	81400000	70300000	57800000	63700000	61700000	68700000	65500000	62700000	71900000	64200000	49500000	99200000
cg1680	Short-chain	Short-chain			566040	253935			382143	196609	0	0	0	641756	96691,1	433969
cg1682	Trypsin-like	Trypsin-like														63048,7
cg1683	Superfamily	Superfamily		13600000	10400000	6150000	7910000	12700000	9840000	14000000	8120000	8220000	6150000	8240000	7920000	11700000
cg1686	Predicted	Predicted		3050000	1830000	1970000	727482	1350000	1050000	1010000	473309	1110000	2000000	705327	1100000	1290000
cg1687	Predicted	Predicted		4310000	4620000	2590000	2520000	2650000	2220000	4980000	1930000	1890000	768523		1850000	2060000
cg1688	Putative	Putative		1340000	924617	752392	866076	385674	477554	446397	269389	260861	923559	503588	1050000	1150000
cg1690	Putative	Putative		543424	750860		385791	496567		654676	468479	442456	645191	1120000	174117	387454
cg1691	ATPases	ATPases		3490000	4570000	2410000	4470000	2440000	2270000	2930000	1310000	1700000	3870000	1350000	1120000	1980000
cg1695	Putative	Putative		2380000	1450000	2830000	2040000	1620000	3150000	2060000	2340000	2940000	2650000	1730000	2430000	1510000
cg1700	putative	putative		6480000	4990000	11600000	7470000	5910000	3500000	4630000	2530000	3020000	2660000	3350000	6940000	4440000
cg1702	hypothetical	hypothetical		1130000	1230000	1180000	1290000	981779	1250000	1020000	1560000	1490000	1140000	565240	972255	841970
cg1704	Bacterial	Bacterial		497643	342115	381444	221122		389599		767192	337804	834862		299925
cg1706	Low	Low		5010000	3950000	3490000	4430000	2770000	2800000	2710000	2730000	3920000	3840000	3300000	957463	2430000
cg1708	conserved	conserved		16200000	18600000	15000000	15900000	21500000	12300000	13100000	20000000	13500000	22600000	9600000	7290000	8260000
cg1711	oxidoreductase	oxidoreductase		0	0	0	89405,4	161581	66464,4	96029	0	0	0	130162	237799	140036
cg1715	hypothetical	hypothetical		404435	278725	240904	367464	302246			150293		334924		5245,37	4374,8
cg1718	Phospholipid-binding	Phospholipid-binding		6630000	7210000	8310000	25100000	5720000	5180000	7910000	4850000	6700000	10400000	5400000	26100000	7520000
cg1722	GCN5-related	GCN5-related		7940000	11000000	14200000	13900000	5190000	8950000	5970000	9700000	9750000	5940000	5240000	13200000	7310000
cg1724	putative	putative		8440000	4260000	2370000	5580000	2000000	2010000	3330000	3540000	3790000	2100000	3250000	4140000	1430000
cg1728	conserved	conserved		3950000	5800000	10600000	2250000	3980000	9780000	2400000	4690000	2880000	4300000	3380000	3420000	4700000
cg1730	secreted	secreted		3220000	4670000	5570000	4620000	5150000	3770000	3830000	2440000	2010000	3400000	1460000	2420000	2050000
cg1731	Membrane	Membrane										78478,1	46224,4			94642,1
cg1732	conserved	conserved		1360000	1490000	1240000	743583	2260000	791497	2440000	1400000	1690000	2710000	1920000	1430000	3430000
cg1733	conserved	conserved		468394	753757	504898	713606	388224		765432	1840000	2300000	1410000	1020000	865131	306030
cg1735	secreted	secreted		11700000	14900000	11000000	6080000	15200000	13500000	9120000	10900000	10900000	15400000	3290000	4190000	3090000
cg1738	TRANSCRIPTIONAL	TRANSCRIPTIONAL		204326	169471	149676	171244	202045	485665	225466	237367	241483	345186	135022	92263,6
cg1739	Glutamine	Glutamine		5580000	5830000	10900000	10500000	6370000	6930000	6780000	11500000	13800000	6700000	6870000	10000000	14600000
cg1740	putative	putative		15900000	22800000	24700000	32200000	39000000	17100000	26800000	19400000	10600000	19700000	10100000	20200000	11300000
cg1742	ACT	ACT		1120000	1100000	6290000	0	0	0	0	2010000	955800	2710000	4160000	3100000	733455
cg1743	conserved	conserved		41600000	75700000	54800000	23500000	73600000	23300000	35100000	37900000	78000000	60200000	37800000	32000000	33400000
cg1746	putative	putative		215718		223745	239058	195122	113201	175371	143596	188354	238259	230063	179816	231725
cg1753	ATPase	ATPase		33100000	34200000	36200000	29300000	33500000	28200000	31800000	51900000	38900000	51800000	48700000	30900000	43600000
cg1758	putative	putative		252348	283801	516603	330620		299883	103398	202189	284549	381453	145850	103749	398526
cg1759	Predicted	Predicted		14900000	22100000	44700000	7350000	14000000	21300000	22100000	15400000	31400000	35300000	18000000	5560000	21400000
cg1760	NifU	NifU		5490000	4560000	3820000	1310000	2500000	2390000	4280000	1860000	3670000	9450000	2350000	1760000	5270000
cg1765	Predicted	Predicted			671956	180753	688385		217746	281781	1100000	1090000	392004	1450000	559658	618557
cg1767	ABC-type	ABC-type		4370000	2470000	3200000	6090000	1970000	2970000	2130000	3430000	4320000	742920	6590000	1590000	2770000
cg1792	putative	putative		4990000	9910000	4960000	4520000	4860000	6870000	7360000	3520000	6860000	3860000	4450000	3230000	2890000
cg1793	conserved	conserved		5500000	6860000	8430000	6720000	4860000	6410000	4510000	5220000	6050000	7500000	4790000	6850000	9490000
cg1794	Uncharacterised	Uncharacterised		632265	1070000	1640000	1080000	665426	813207	2000000	638966	633720	2390000	1540000	1460000	2020000
cg1809	DNA-directed	DNA-directed		98900000	198000000	93000000	204000000	209000000	99600000	178000000	152000000	74000000	56600000	169000000	164000000	149000000
cg1819	nucleoside-diphosphate	nucleoside-diphosphate		8210000	3160000	7510000	3200000	6410000	8290000	8280000	10600000	2100000	1620000	2570000	3680000	5200000
cg1821	conserved	conserved					1040000	633421		767898			433010	944182	980553	736844
cg1823	hypothetical	hypothetical		9150000	10700000	9540000	4760000	7400000	7480000	5730000	9120000	11100000	11200000	5790000	3470000	3100000
cg1831	Bacterial	Bacterial			439187	426494	175232	225919		349356			184388	355630	257563	565529
cg1833	ABC-type	ABC-type		439345	190949	767778	446883	659228	443594	683932	452969	413277	598555	619631	814299	654295
cg1834	ABC-type	ABC-type		385347	378538	402774	949975		285782	441179					916157
cg1836	secreted	secreted		2200000	4460000	2730000	3690000	3090000	2050000	3170000	1750000	768942	1870000	1940000	2900000	2460000
cg1837	Predicted	Predicted		8780000	15700000	7810000	9560000	15200000	11800000	12200000	6790000	11900000	5680000	6410000	8940000	13500000
cg1839	Uncharacterized	Uncharacterized		1290000	2000000	1150000	1540000	672368	1460000	1850000	1780000	858372	842515	761890	1540000	1850000
cg1840	conserved	conserved		14400000	13200000	13600000	15700000	14600000	14200000	21300000	9150000	10300000	13200000	11500000	10200000	11500000
cg1842	putative	putative		311234	292001	350252	128908	464978	327698		164025	144350	235803	186905	62662	139720
cg1843	Superfamily	Superfamily		27370,5	18085,4					11415	22518,2	40847,5	46782,9		1250000
cg1844	membrane	membrane		1210000	1150000	1340000	921640	1310000	905562	777209	1090000	1090000	531970	1190000	472936	571974
cg1845	conserved	conserved		18300000	22600000	6430000	12600000	17700000	22800000	23000000	12300000	13600000	14500000	27600000	9450000	8820000
cg1847	conserved	conserved		928754	2690000	1240000	1900000	1420000	999431	2680000	1750000	822980	1610000	562852	1070000	1110000
cg1848	Coenzyme	Coenzyme		6550000	2570000	2190000	2640000	4010000	1870000	3140000	1220000	1770000	2360000	1190000	1560000	1580000
cg1856	Zn-dependent	Zn-dependent		5990000	5900000	9050000	4360000	6500000	3680000	4580000	3230000	2930000	5380000	3810000	3720000	12900000
cg1859	putative	putative		58500000	43300000	68400000	43800000	63500000	74100000	52700000	59200000	86500000	137000000	113000000	86200000	108000000
cg1864	ABC-type	ABC-type		559134	970512	922090	991376	1210000	623842	973097	858396	773010	1510000	552117	1530000	1050000
cg1872	conserved	conserved		48100000	76500000	49100000	62300000	57000000	61000000	58600000	57100000	50900000	70400000	75200000	64900000	37900000
cg1874	putative	putative												186590	116372	224822
cg1875	putative	putative		2670000	5270000	4500000	3760000	3890000	4700000	3930000	2170000	2790000	3710000	1450000	5220000	3010000
cg1876	GLYCOSYL	GLYCOSYL		45768,5		25147,6	50803,2	30288,1	44894,2	11291,9	18643,3	15920,8	69995	20253,3	21676	41366,4
cg1879	HIT	HIT		1960000	1340000	1350000	3100000	2340000	793107	1670000	1830000	2330000	2080000	2390000	2090000	1570000
cg1881	Predicted	Predicted		1250000	1720000	7280000	2250000	5720000	7660000	6110000	4510000	4440000	2240000	3570000	3010000	6920000
cg1883	putative	putative		757000000	637000000	244000000	855000000	598000000	587000000	735000000	312000000	346000000	1070000000	284000000	682000000	509000000
cg1893	acetyltransferase	acetyltransferase		87107	52184,3	105662	62560,4	100113	118833	50921,2	108137	95669,5	194706	95806,1	78456,9	93733,7
cg1894	hypothetical	hypothetical		323566	267848	151858		203782		345478	107342		238413	180030	177074	333100
cg1897	putative	putative				117063			18900000		61852,3			38725,2		29305,4
cg1903	ABC-type	ABC-type		849935	1100000	482267		598647	365710	535658		357445	859932	243015		719148
cg1904	putative	putative					117464	162844			118040			186497	111444	320883
cg1905	hypothetical	hypothetical		1610000	1310000	499670	1500000	583540	921517	590459	770899	1060000	474387	496028	337418	336758
cg1906	hypothetical	hypothetical		827887	720577	467513	472122	449104		425313	399295	304980	420416	307890	216572	346441
cg1907	putative	putative		7200000	4930000	3450000	3770000	4990000	3800000	3730000	3700000	3590000	4000000	2970000	2400000	2800000
cg1911	putative	putative		34700000	40000000	59900000	23600000	43400000	25700000	21600000	29600000	25300000	44000000	25200000	29900000	15500000
cg1917	hypothetical	hypothetical		1260000		1190000	985417	4140000	11800000	5790000	2160000	1540000	925378	13200000	12200000	2900000
cg1930	putative	putative		922556	9410000	12500000	3430000	3470000	3320000	1700000	7670000	1630000	3290000	4370000	1190000	4410000
cg1931	putative	putative				127655			99675,8		66147,5		60436,6	35721,6		40657,9
cg1935	Bacterial	Bacterial		3170000	4230000	5340000	8820000	4290000	4190000	4960000	2360000	4090000	2540000	2770000	4360000	2840000
cg1943	hypothetical	hypothetical		315939	505391	217218	255057	315629	306282	318755	360401	352832	286696		493378	279188
cg1966	hypothetical	hypothetical		33500000	34200000	49700000	26400000	35300000	39000000	28300000	21900000	25400000	49700000	20900000	23700000	29600000
cg1975	conserved	conserved				7538,16					6550,48		8047,25
cg1977	putative	putative					9499,18		12836,7	10663,1	13769,5	13234,4	5451,64	11301,7	17682,1	10817,5
cg1980	MoxR-like	MoxR-like		0	0	0	0	0	0	0	0	0	0	610582	407823	587776
cg1987	hypothetical	hypothetical		2430000	5470000	5850000	1890000	5130000	1700000	2590000	2320000	1520000	10900000	1890000	1210000	2240000
cg1988	hypothetical	hypothetical							11633,1				9886,08
cg1992	hypothetical	hypothetical		972592	505576	293967	356791	230078	572940		528794	677735	1370000	369982	337745	415445
cg1993	hypothetical	hypothetical			140567	49908,1	154398	80608,8	172682	103626	263994	178582	122990	98289,2	98226,5	188106
cg2001	conserved	conserved				89620,1	74428,9	93483,2	79696,9	65900,5	99007,1	88368,8	75594,4	128141	91910,4	168539
cg2012	putative	putative			615528		575107	265961	348253	764660		1130000		597498	483426	415636
cg2014	hypothetical	hypothetical		354844	225322	123960	389291	175574	240950	195820	187723	206468	565983	275885	429705	501190
cg2017	hypothetical	hypothetical					2420,35						6977,26	10345,6	7071,78
cg2019	putative	putative		183623	221269	301034	278587		142862	252199	542865	588772	369395		197924	304347
cg2024	putative	putative			64048,2				49697,4						27183,2	28729,9
cg2025	hypothetical	hypothetical		20800000	26000000	26800000	23000000	27700000	25200000	27800000	14100000	11500000	30500000	20200000	16100000	8840000
cg2026	hypothetical	hypothetical		168000000	199000000	245000000	171000000	195000000	182000000	118000000	316000000	302000000	425000000	132000000	140000000	172000000
cg2028	hypothetical	hypothetical		346054			36166,5		83107	181972	219750	170410		85949,1	511323
cg2031	conserved	conserved		709611	938154	1300000	1180000	471627	1790000	559284	806533	1700000	647353	2040000	928328	1900000
cg2033	putative	putative		6810000	7380000	6780000	5010000	11100000	10900000	10600000	4650000	8240000	8620000	5750000	13800000	5870000
cg2034	hypothetical	hypothetical		3350000	2030000	2100000	3030000	1330000	5010000	2100000	3280000	2990000	1590000	3820000	2670000	1900000
cg2036	putative	putative					318122		957984	407125	448154	2970000	1250000	328434	120421	894649
cg2039	hypothetical	hypothetical					2190000		482976			724018	721324		2180000
cg2040	putative	putative		1510000	2490000	799551	1620000	1940000	1610000	2940000	2300000	1830000	2020000	3840000	2000000	1950000
cg2042	putative	putative		14100000	19600000	28200000	14900000	21600000	25300000	19000000	24000000	14800000	22400000	18900000	8120000	9650000
cg2043	conserved	conserved		1820000	2100000	2060000	1540000	2760000	3470000	3460000	2120000	2410000	2500000	1850000	1030000	1650000
cg2044	putative	putative		980609		1640000	1590000		846458		985223	1060000	1950000	902066	1320000
cg2051	hypothetical	hypothetical		6550000	5570000	5320000	8290000	5920000	5320000	7010000	5370000		4810000	4490000	6010000	3580000
cg2052	putative	putative		39200000	38400000	44200000	16700000	40300000	61400000	42600000	22100000	27000000	34100000	11500000	6910000	20700000
cg2055	putative	putative				54347,4	79045,1	32347,3		35227,4					35751,2	42767,4
cg2057	putative	putative		6410000	9670000	20200000	4280000	11200000	13300000	5170000	11000000	5280000	10200000	5330000	5050000	4470000
cg2062	SIMILAR	SIMILAR		40579,8	28235,3	19378,1	18546,2	22576,7	30007,1	19727,8	48021,2	43381,1	30256	19546,8	28207,5	20618,7
cg2067;cg1510	conserved	conserved			22860,2		56476,8	29417,9	44582,2	41683,5	44310,9	22780,2		43899,4	21727,8	38872,8
cg2077	putative	putative								25497,6		70702,7		227653	117907	170088
cg2078	PEPTIDE	PEPTIDE		11900000	14000000	13100000	9120000	16300000	14300000	8950000	22300000	19300000	23300000	10100000	5770000	7640000
cg2079	conserved	conserved		17800000	23000000	17400000	21200000	16300000	16200000	18700000	23400000	23300000	16500000	23900000	18800000	15600000
cg2080	conserved	conserved		7810000	18800000	10800000	13100000	21400000	16700000	22000000	7320000	11000000	14100000	9410000	10100000	11800000
cg2084	PUTATIVE	PUTATIVE		825128	716685	890500	1430000	670244	652523	814761	866582	1160000	957746	1120000	548266	1510000
cg2085	conserved	conserved		55600000	45400000	70300000	37100000	41700000	55500000	39900000	38000000	39500000	34000000	27800000	26900000	29600000
cg2087	putative	putative		7520000	4340000	4130000	2490000	4440000	1920000	2230000	1820000	1600000	3390000	1890000	1630000	2290000
cg2089	conserved	conserved		36100000	21800000	21300000	19600000	23800000	20200000	20900000	34700000	18800000	38100000	25200000	17900000	24200000
cg2095	putative	putative		180255	160199			150314	101268	196507						68394,9
cg2097	DNA	DNA		9580000	12300000	8880000	7270000	7300000	6620000	7100000	9300000	7770000	4410000	15900000	10800000	17300000
cg2098	conserved	conserved		30800000	23500000	26200000	14300000	45100000	21400000	21200000	24900000	22900000	28700000	11900000	8920000	31600000
cg2099	putative	putative		167913	308686	265693	196952	129590		171178	78046,1	74949,6	81661,1	111609	36668,8	50679,2
cg2100	rRNA	rRNA		0	0	0	0	0	0	0	0	0	0	2760000	1040000	2280000
cg2101	putative	putative		626760		393970	321677	630490	511463	268298		361584		714272		457624
cg2106	CONSERVED	CONSERVED		7320000	7640000	8680000	8660000	7100000	5230000	6610000	3290000	4990000	4490000	2600000	8280000	6000000
cg2107	Superfamily	Superfamily		1820000	1300000	2140000	1400000	1770000	1680000	1340000	2540000	936714	1410000	876918	1360000	1770000
cg2112	putative	putative		341403	574487	654961	476474	514855	926748	192049	695403	380085	684264	590403	358355	428842
cg2113	hypothetical	hypothetical						20246			54597,1	67937,2	57441,9	14303,1	13856,4	47156,4
cg2115	transcriptional	transcriptional		14500000	7740000	13300000	10400000	6590000	4000000	3870000	5890000	7150000	3530000	3690000	2800000	4860000
cg2116	PUTATIVE	PUTATIVE		580899	8070000	5780000	3920000	3070000	1770000	2350000	291255	248353	561757		4830000	3350000
cg2118	transcriptional	transcriptional		1610000			536354		534899		1870000	410047	308469	3410000	753422
cg2124	hypothetical	hypothetical		16800000	29200000	25000000	13900000	14900000	21700000	21300000	19500000	18900000	31700000	13600000	13700000	17800000
cg2126	GTPase	GTPase		6040000	4120000	3660000	3300000	4180000	3610000	4350000	3870000	5990000	5220000	3410000	4670000	5640000
cg2127	conserved	conserved		2010000	4710000	3350000	1620000	5230000	2600000	4500000	2000000	2030000	3170000	5650000	4510000	16100000
cg2128	putative	putative		648551	417859		281465	539692		399697	553896		935368	171362	342793	241819
cg2131	conserved	conserved		2860000	6130000	4150000	2770000	4900000	3550000	4250000	3630000	2210000	6550000	2790000	5000000	1400000
cg2132	conserved	conserved		121000000	180000000	156000000	175000000	168000000	150000000	177000000	132000000	148000000	141000000	138000000	161000000	116000000
cg2133	Acetyltransferase,	Acetyltransferase,		421627	268068	317663	232706	592655	256232	398874	250029	233769	517785	231422	604112	608832
cg2134	putative	putative		3810000	7590000	8800000	5290000	3520000	6620000	8430000	8120000	3820000	6880000	5520000	4700000	5480000
cg2145	conserved	conserved		2070000	1660000	1950000	1070000	2720000	2240000	1380000	1600000	2640000	1430000	1240000	657502	994814
cg2147	membrane	membrane		539614	1480000	850539	2990000	1910000	1960000	992336			1310000	779820	1040000	10600000
cg2148	ABC	ABC		315766	482279	312776	241906	414480	317052	246612	138489	529183	340121		314511	92356,7
cg2151	Similar	Similar		148000000	189000000	202000000	151000000	176000000	171000000	170000000	149000000	132000000	128000000	129000000	147000000	122000000
cg2153	similar	similar		20979,9	20764,4	14082,9		26250,7	20019,9	19607,1	13044,5	13874,2				640666
cg2155	conserved	conserved		61800000	72000000	85500000	60700000	64900000	88700000	59900000	48600000	50300000	71900000	73800000	63100000	44500000
cg2159	conserved	conserved		11000000	6290000	9210000	11800000	2840000	13000000	3320000	7700000	7930000	10100000	3990000	10600000	14500000
cg2160	HYDROLASE	HYDROLASE		32600000	24800000	28500000	39000000	27300000	29200000	36200000	20000000	24400000	28500000	35800000	39900000	45100000
cg2165	putative	putative		1910000	2680000	3230000	1890000	3190000	2600000	2540000	2230000	2750000	996872	1570000	1690000	2060000
cg2179	conserved	conserved		80600000	29500000	37900000	90100000	33900000	57100000	34000000	16000000	30700000	35700000	54100000	31900000	22100000
cg2180	putative	putative					15245,8								19178,1
cg2181	ABC-type	ABC-type		21500000	41000000	17200000	15600000	21900000	17600000	22800000	11200000	19600000	14500000	11200000	14700000	8520000
cg2182	ABC-type	ABC-type			95614,8	83800,6	163536		138700	58601,1	243140		50068,2		42672,6	243439
cg2184	ATPase	ATPase		14200000	13500000	12900000	8590000	7110000	10100000	14700000	7530000	10700000	9860000	10700000	7180000	7660000
cg2186	conserved	conserved		8110000	7580000	8140000	10300000	9180000	6020000	7960000	4260000	6400000	3830000	10000000	14800000	9570000
cg2188	Mg-chelatase	Mg-chelatase		439285	386852		288006	309047		219342	159416	243718	279125	236844	220168	261811
cg2190	conserved	conserved		1910000	1210000	1620000	2880000	2090000	1580000	1140000	2450000	1860000	1610000	1920000	2080000	2600000
cg2191	conserved	conserved				414492	422384					300795	837162	441469		916740
cg2193	putative	putative		2020000	1630000	2270000	1200000	1780000	1790000	1150000	3690000	1650000	2060000	874846	878037	1300000
cg2200	Response	Response		5380000	10400000	5730000	4300000	8680000	5520000	7420000	5940000	4880000	4040000	3720000	2620000	3060000
cg2201	signal	signal		2660000	1900000	871369	948301	947394	1730000	623697	782077	1490000	1630000	350124	374479	611458
cg2207	Predicted	Predicted		1010000	1600000	1580000		1200000	1000000	1480000			3330000	1170000	1580000	519111
cg2211	putative	putative		9360000	11800000	10100000	16300000	6710000	13300000	4150000	9060000	11000000	14300000	8530000	3990000	5020000
cg2213	ABC-type	ABC-type		293219	546017	471050	250492	572022	415213		453655		564307	553368	208211	369413
cg2214	Predicted	Predicted		42800000	39600000	65700000	47900000	53900000	59600000	45900000	56700000	59700000	55800000	56400000	44800000	62100000
cg2229	putative	putative		2400000	1560000	2740000	2220000	2240000	1100000	1600000	3640000	4530000	1770000	3360000	5340000	2190000
cg2234	ABC-type	ABC-type			1300000	1920000	601722	461358	699538	672376	856084	670106	1090000	1240000	273464	491758
cg2241	PUTATIVE	PUTATIVE		454400	361340	1020000	644779	526629	533834	595246	977872	1490000	877790	2290000	1270000	836414
cg2242	PUTATIVE	PUTATIVE			35900,3		42650,9	27236,3	25451,3	30313,8				35068,6		57967,7
cg2247	conserved	conserved		28444,9		54292,3		29278,2		28113,4	15444,3	15509	20520,1	8573,08	7286,57	17266,4
cg2250	PUTATIVE	PUTATIVE											1260000			720610
cg2252	double-stranded	double-stranded		19800000	16800000	5500000	0	0	0	0	0	0	0	0	0	0
cg2263	conserved	conserved		3110000	3870000	3790000	3010000	4170000	2480000	2010000	3670000	2240000	6240000	7550000	3800000	8620000
cg2266	PUTATIVE	PUTATIVE		1970000	1170000			751639	426634	482047	558230	628453	717853	1640000	292366	415190
cg2267	putative	putative		1220000	1510000	1820000	1240000	1150000	1370000	854683	1190000	1180000	889361	1030000	909886	1510000
cg2274	Predicted	Predicted		35000000	29600000	43500000	33900000	29100000	42100000	22800000	40900000	55100000	37000000	34400000	16900000	15000000
cg2275	putative	putative		93100000	76400000	99800000	86600000	88600000	120000000	99800000	84800000	75100000	79000000	55200000	73600000	59100000
cg2277	ABC-type	ABC-type					98110,3	48711,5					63106,8	83643	66951,8	143977
cg2279	ABC-type	ABC-type				283549	210361			109954	187050		95462,2	51246,9	120538	194006
cg2283	conserved	conserved		9270000	6880000	6570000	9010000	10000000	8710000	8140000	6730000	6450000	2890000	7510000	10200000	7100000
cg2284	Galactose-1-phosphate	Galactose-1-phosphate		815409	698714	1300000	1460000	2360000	969813	1360000	757368	940546	862665	1000000	725366	1390000
cg2290	Glyoxalase/Bleomycin	Glyoxalase/Bleomycin			508041	438975	609499	431697	285961	407655	201629		271289	121254	558259	714293
cg2293	putative	putative												338085	293225
cg2294	putative	putative		980120	2320000	726650	2980000		711117	1980000			2040000	1170000	1160000	1720000
cg2306	conserved	conserved					2730000								1020000
cg2307	putative	putative												4392,97	2618,76
cg2308	putative	putative		115000000	210000000	126000000	191000000	194000000	115000000	194000000	122000000	195000000	167000000	110000000	99300000	45400000
cg2309	Bacterial	Bacterial		894738	411920	337824	188419	831768	422460	491669	299518	300494	496666	131363	216072	526721
cg2311	SAM-dependent	SAM-dependent		9780000	5400000	14900000	10000000	5280000	9350000	13200000	4560000	2800000	6250000	5110000	2520000	5530000
cg2314	transcriptional	transcriptional			481389	278280	456598	609260		195225	144103		688641	410836	190329
cg2318	ABC-type	ABC-type		29800000	77900000	109000000	33400000	62900000	50900000	58700000	91700000	87300000	27300000	62400000	24400000	14900000
cg2321	DNA	DNA		1960000	1590000	2510000	1070000	1940000	1840000	1950000	2080000	1660000	2150000	3250000	3800000	5100000
cg2324	conserved	conserved		532658	298414	197103	184673	258209	143976	237836	288038	206799	110644	161526	160443	50683,8
cg2326	hypothetical	hypothetical								15034,1			23139,8		35468,3
cg2328	hypothetical	hypothetical		217571	121375		128855	121233		95713,4					103542	74945
cg2329	Coenzyme	Coenzyme		630668	806754	565801	328419	405953	235483	335106	322138	297196	137985	296358	556733	219391
cg2330	Ribosome-associated	Ribosome-associated		33243							62953,3		61998,3	21283,6	262425	33081,8
cg2331	putative	putative		1980000						1670000	1370000		1880000	1280000	2750000	2570000
cg2337	similar	similar		2170000	2940000	2910000	2720000	2190000	3230000	2230000	3870000	3320000	5210000	3550000	1730000	3020000
cg2340	ABC-type	ABC-type		594313	605230	573990	807166	692882	815905	657541	4200000	3150000	734818	1780000	781855	308797
cg2342	Dehydrogenase	Dehydrogenase		15500000	15000000	15900000	24700000	23100000	23600000	23100000	16100000	9840000	17800000	17700000	14400000	17800000
cg2343	decarboxylase	decarboxylase		0	0	0	101449	53674,6	66671,2		0	0	0	164927	130724	366966
cg2345	putative	putative		1020000	1040000	640032	615227	905098	529441	556610	592065	539076	1210000	378971	379093	300699
cg2348	putative	putative		8710000	21100000	9150000	16500000	11600000	27900000	23000000	10100000	24900000	21200000	15900000	13100000	15300000
cg2349	ATPase	ATPase		62657,3		121597	82563,4			32738,2	107664	77575,8	75508,5		91992,2	34462,6
cg2350	conserved	conserved		25500000	37400000	44400000	54400000	59500000	94300000	108000000	64900000	71000000	54000000	90600000	55900000	27400000
cg2357	Bacterial	Bacterial					54336,8								40536,2
cg2361	Cell	Cell		606000000	842000000	1090000000	685000000	720000000	765000000	636000000	608000000	559000000	676000000	418000000	386000000	376000000
cg2362	putative	putative			43304,5	44682	76649,1	16669,2		62439,7			14958,3	19226,6	91677,4
cg2363	conserved	conserved		750516	797854	618155	695362	1220000	695289	883264	920430	882570	907793	1470000	1840000	1460000
cg2364	pyridoxal-5'-phosphate	pyridoxal-5'-phosphate		0	0	0	0	0	0	0	0	0	0	5440000	3120000	4610000
cg2365	conserved	conserved		6650000	1800000	4320000	4670000	7280000	12700000	7310000	5140000	4080000	5180000	6760000	3580000	3940000
cg2380	putative	putative		51567,5	141872	89099,7	98499,6	216771	252971	194757	110881	87335,5	324770	439879	95668,7	35931,1
cg2382	GCN5-related	GCN5-related		659877	961495	565773	1380000	903092	276440	3970000	3930000	5850000	4990000	1810000	1210000	1140000
cg2386	conserved	conserved		26700000	43500000	54800000	59400000	35200000	45300000	37300000	56900000	68400000	53100000	44600000	31900000	26200000
cg2393	putative	putative		220654	427716	737938	498044	80689,8	518580	143466				217037	1640000	283419
cg2400	PUTATIVE	PUTATIVE		826806	1150000	1660000	666007	2710000	1110000	1040000	801019	2120000	1060000	790018	679180	2010000
cg2401	SECRETED	SECRETED		6690000	4920000	3350000	3160000	5140000	16300000	11300000	9240000	9840000	5610000	4060000	2470000	3670000
cg2408	putative	putative												1190000
cg2411	Hypothetical	Hypothetical		346000000	345000000	766000000	474000000	438000000	655000000	225000000	532000000	463000000	622000000	337000000	127000000	280000000
cg2412	putative	putative		9500000	11100000	11700000	11800000	8330000	11800000	27400000	20000000	28000000	30600000	13100000	10100000	5430000
cg2417	SHORT	SHORT		38500000	54900000	42800000	50300000	36400000	33500000	33600000	33700000	40200000	38400000	26600000	36000000	22000000
cg2420	conserved	conserved		1600000	1570000	1850000	1740000	1320000	1640000	1420000	1210000	1410000	831661	1540000	1300000	975621
cg2424	putative	putative		17100000	35700000	22500000	23800000	27200000	24400000	24800000	16500000	24300000	18000000	29900000	27800000	23300000
cg2425	Predicted	Predicted					216218		143806	179654	231376	253464	345279	373021	121499	595480
cg2428	putative	putative		3310000	1120000	1520000	1780000	742444	1750000	1570000	791814	1130000	3650000	833732	11700000	12600000
cg2431	PUTATIVE	PUTATIVE		16700000	23100000	36400000	43000000	39600000	34000000	25400000	60500000	65200000	35700000	52600000	37800000	16400000
cg2432	MUTT/NUDIX	MUTT/NUDIX		3320000	8380000	7330000	5910000	4460000	3670000	5210000	3990000	4560000	6000000	9070000	5760000	4430000
cg2444	hypothetical	hypothetical		34500000	54800000	46900000	43000000	44000000	36800000	40200000	40000000	31700000	40200000	34800000	26900000	19200000
cg2450	putative	putative		18300000	10400000	10100000	13000000	11300000	13900000	9740000	10600000	8040000	7390000	11100000	8110000	10300000
cg2451	conserved	conserved		108000000	141000000	210000000	83400000	103000000	152000000	76300000	189000000	121000000	210000000	67100000	38300000	61100000
cg2452	galactokinase	galactokinase		0	0	0	180164	175316	188504	258009	0	0	0	714569	351308	1000000
cg2453	PUTATIVE	PUTATIVE		2490000	1920000	1660000	1920000	1860000	1820000	1930000	1350000	2180000	1180000	1500000	1410000	2710000
cg2455	Ribonuclease	Ribonuclease		3490000	2940000	2500000	4210000	2730000	3290000	2280000	3330000	3460000	2900000	4980000	2750000	7190000
cg2456	Zn-ribbon	Zn-ribbon		298000000	369000000	399000000	333000000	287000000	370000000	296000000	288000000	327000000	304000000	242000000	282000000	181000000
cg2457	conserved	conserved		1150000	1400000	1580000	1530000	1490000	1230000	1140000	1140000	1130000	1270000	1130000	1280000	1320000
cg2460	putative	putative		2930000	4210000	1370000	667388	1840000	514517	2270000	945996	1110000	1350000	576915	556486	328103
cg2464	conserved	conserved		24400000	23700000	47600000	19300000	32900000	22200000	29200000	71200000	77800000	145000000	51100000	24500000	30700000
cg2467	ABC	ABC		10500000	12300000	10400000	19400000	11200000	9620000	10100000	14300000	11500000	11800000	8520000	5670000	6440000
cg2470	SECRETED	SECRETED		1830000	1460000	3320000	2350000	1140000	776954	762075	509048	400030	556766	259020	3720000	456217
cg2471	weakly	weakly		0	0	0	246507	334793	747636	620441	0	0	0	167756	582541	82861,5
cg2475	ATPase	ATPase		4340000	5290000	6710000	5970000	5410000	5700000	4930000	7460000	3790000	4830000	4210000	2790000	3040000
cg2478	putative	putative		1860000	1740000	1830000	13400000	1360000	1300000	1740000		970592	1490000	1460000	17300000	1840000
cg2479	hypothetical	hypothetical		21104		71518,3	27276,2		41636,3		55842,3	36974,3	63856,2	23378,9	32495,7
cg2484	hypothetical	hypothetical		154700	1080000	272872	480264	411675	107115	403181	202961	257660	159423	180919	360581	411302
cg2487	conserved	conserved		1440000	1830000	1940000	2740000	1110000	1920000	1970000	1540000	2590000	1640000	2730000	3290000	3910000
cg2488	conserved	conserved		10400000	12200000	11500000	9990000	12300000	6590000	16700000	14700000	9780000	16300000	13000000	24000000	9930000
cg2490	secreted	secreted		583022		908512	1250000	3750000	3100000	1430000	2960000	1810000	3490000	2720000	1440000	2360000
cg2491	conserved	conserved			12736,6	43327,7	14957,2	27043,6	23847,6	15503	31620,4	34558,2	33931,2	27678,9	8228,08	18587,7
cg2495	conserved	conserved			9980000	2590000	1940000	7650000	1620000	708722	2230000	553941	4210000	530967	4980000	1030000
cg2496	putative	putative		16200000	17400000	20500000	15400000	20900000	19000000	17000000	14900000	12900000	14200000	8680000	13900000	11000000
cg2497	hypothetical	hypothetical		881994	889196	233160	666943	379342	419102	370859	562763	217679	1420000	2190000	1020000	348885
cg2498	conserved	conserved		2010000	1020000	1140000	2680000	2110000	1900000	2400000	3980000	4470000	1850000	4310000	1620000	1220000
cg2500	Bacterial	Bacterial		3100000	7900000	2310000	2290000	2360000	2800000	3760000	2290000	2320000	1730000	2290000	2100000	1710000
cg2507	putative	putative		953510		897419	112419	1130000	317308	269806	97310,8	345930	202448	99876,9	57928	469866
cg2511	putative	putative		56101,5	108337	96149,5	101910	77638,5	73383	47987,6	105238	71188,5	68185	124062	144506	217765
cg2514	conserved	conserved		58505,9			377019								186497
cg2519	conserved	conserved							7898,3						5680,62	12212,7
cg2520	hypothetical	hypothetical		7030000	15300000	11600000	7010000	12400000	9210000	8990000	17400000	9220000	17400000	7880000	6380000	5460000
cg2524	putative	putative		283158	158593	150547	262970			451198	520418	179360	219162	450883	84256,8	94329,7
cg2525	putative	putative		515046	128774	534036	255180	443189	164645	634388		139267	136429	61989,4
cg2528	TYPE-B	TYPE-B		0	0	0	0	0	0	0	0	0	0	555528	649631	801475
cg2535	putative	putative		7720000	11600000	10900000	10800000	10100000	6320000	8230000	12100000	11600000	17500000	5550000	3350000	2790000
cg2538	ALKANAL	ALKANAL		1620000	1720000	1380000	2310000	1330000	1120000	1700000	1140000	1580000	2220000	1230000	2980000	939007
cg2544	Bacterial	Bacterial		964111	1770000	1080000	509297	695390	779538	900403	1040000	1610000	1320000	465578	684102	591914
cg2549	ABC-type	ABC-type		300058	542304	191894	210001	234101	203600	261407	129428	203422	496624	116101	135602	78146,8
cg2550	ABC-type	ABC-type					226130						149334	187017	168950
cg2551	ABC-type	ABC-type			2490000	1950000		3540000				2830000		1750000
cg2552	ATPase	ATPase												800224	96766,9	69780,9
cg2556	Uncharacterized	Uncharacterized			3310000	3810000	1820000	2880000		2510000	2400000	1900000	4690000	6540000	4320000	5650000
cg2558	related	related		32500000	46000000	60900000	56200000	54700000	43100000	47200000	51700000	46100000	41300000	33500000	31100000	17400000
cg2562	Serine/threonine	Serine/threonine		7010000	6390000	4510000	5900000	9210000	5500000	6630000	5460000	4200000	2280000	9770000	8400000
cg2564	hypothetical	hypothetical										23116,3	269921
cg2565	hypothetical	hypothetical		2250000	2210000	1790000	1260000	1700000	2350000	2880000	2590000	2920000	1990000	1940000	1700000	1120000
cg2567	hypothetical	hypothetical								16473,2					29061,2
cg2572	conserved	conserved		2330000	2310000	2250000	2320000	1630000	1220000	1030000	1440000	2280000	2330000	754094	947880	1010000
cg2575	Ankyrin	Ankyrin		3470000	3210000	4910000	4110000	4850000	6080000	3640000	7050000	6040000	7680000	5960000	3950000	3360000
cg2576	putative	putative		1020000	1360000	542663	1450000	1250000	656957	866126	1250000	1120000	469586	1530000	484929	970647
cg2579	protein	protein		160038		71220		75074,7	131806	535216		48793,3	309433	118318	254103	303950
cg2581	putative	putative		948593	689159	565900	1280000	612104	501899	569247	538669	579207	734859	673540	391178	446301
cg2582	conserved	conserved		1500000	1110000		1270000	1020000	850378	1070000	717252	922659	1760000	1160000	1380000	1160000
cg2585	putative	putative		10200000	13100000	33100000	13100000	67000000	40300000	9160000	11000000	10600000	22400000	5210000	2870000	7270000
cg2587	Phosphoglycerate	Phosphoglycerate		9760000	10800000	11900000	14400000	11000000	13100000	9800000	13900000	12700000	11900000	14700000	11700000	10500000
cg2589	Predicted	Predicted		11000000	9150000	8380000	13900000	12300000	13200000	12100000	8840000	11300000	10400000	8830000	11000000	11300000
cg2592	hypothetical	hypothetical		354898	746342	312778	575665	265439	2180000	356092	790441	670371	2010000	663137	414307	413974
cg2593	putative	putative			120704					132348		164010			971082
cg2602	conserved	conserved		2630000		740547	688629	744598	694347	2940000		514686	791266	1360000	1480000	701209
cg2604	putative	putative		542277	1950000	1220000	931152	1320000	1660000	1490000	1630000	807580	1990000	1000000	1140000	448164
cg2605	Predicted	Predicted		6480000	7980000	18100000	13100000	9920000	9910000	6500000	12400000	13400000	14500000	5360000	8040000	7250000
cg2606	conserved	conserved		70726,9
cg2610	ABC-type	ABC-type		25200000	40400000	36100000	37100000	31000000	26700000	26300000	9750000	18600000	19600000	5170000	27600000	14800000
cg2612	Predicted	Predicted		5660000	3810000	3500000	5200000	7940000	3950000	5110000	6430000	11200000	11200000	5960000	5950000	6360000
cg2615	Putative	Putative		3130000	3050000	1870000	909430	1440000	2410000	3700000	616348	725447	4010000	627041	5740000	344822
cg2621	conserved	conserved								3030000					1590000	2370000
cg2627	ATP-dependent	ATP-dependent		0	0	0	187571	84439,9	109821	94376,6	0	0	0	67789,3	56799,6	61949,5
cg2641	Bacterial	Bacterial		1740000	2460000	1360000		2350000	1920000	1250000	1220000	1930000	1140000	923462	262049	429703
cg2648	Bacterial	Bacterial		1690000	2000000	1010000	1050000	1250000	952608	2600000	1820000	1990000	3130000	2430000	2430000	2080000
cg2651	conserved	conserved		134000000	203000000	199000000	179000000	295000000	145000000	119000000	221000000	183000000	339000000	123000000	76200000	110000000
cg2657	putative	putative		5210000	4450000	5930000	9690000	4510000	3530000	5160000	4190000	3350000	2860000	4270000	8640000	5200000
cg2661	putative	putative		289000000	330000000	279000000	285000000	312000000	306000000	324000000	275000000	393000000	302000000	216000000	196000000	289000000
cg2664	Predicted	Predicted					74180,2		36618,1		58381,1	103233	107853	69831	154893	285562
cg2665	hypothetical	hypothetical			32544			58980,2						32911,8		46089
cg2674	Alkylhydroperoxidase	Alkylhydroperoxidase		4670000	4140000	3920000	13000000	3730000	2450000	3220000	4580000	5140000	6650000	7080000	14900000	7850000
cg2675	ATPase	ATPase		6150000	6310000	4250000	5030000	6690000	5750000	6220000	5010000	5370000	3790000	6320000	4470000	6620000
cg2676	ABC-type	ABC-type		481530	536609	914093	717426	634247	542275	592244	445103	452895	807118	1530000	1130000	981828
cg2677	ABC-type	ABC-type				327417	106149		400543	187695	87081,6	449948	109896	510750	382382	236574
cg2678	ABC-type	ABC-type		4430000	4560000	4760000	7530000	5820000	4610000	3600000	4620000	3160000	2620000	4460000	8680000	4160000
cg2679	hypothetical	hypothetical		4320000	4480000	5640000	5210000	4690000	5570000	5010000	6190000	3200000	6030000	6300000	4200000	4300000
cg2680	Aminotransferase	Aminotransferase		1600000	2590000	1030000	837650	2130000	2280000	2130000	1440000	2550000	1620000	1260000	3090000	1720000
cg2684	membrane	membrane		335148	315902	395208	89922,9	210681	235500	226701	84389,5	148861	95423,2	70641,3	49806,8	60520,5
cg2685	PUTATIVE	PUTATIVE		5280000	5880000	5100000	6600000	4270000	8320000	4500000	6880000	4810000	6510000	4980000	3870000	7810000
cg2686	Bacterial	Bacterial		13300000	6690000	8580000	13000000	3430000	6300000	6530000	4110000	8300000	6040000	4300000	10500000	3850000
cg2688	ABC-type	ABC-type						510944	283573	421077	316414	447509			36101,8
cg2691	conserved	conserved		11300000	13500000	13600000	10400000	9620000	7130000	9420000	9790000	6700000	10100000	11400000	12000000	13500000
cg2692	Predicted	Predicted		67300000	104000000	50100000	118000000	118000000	84400000	117000000	91800000	108000000	88300000	92400000	174000000	185000000
cg2695	ABC-type	ABC-type		60100000	55900000	56200000	86200000	58300000	46900000	61400000	47800000	53100000	44000000	73600000	67800000	128000000
cg2699	putative	putative											196379	535259	1140000	1190000
cg2701	putative	putative													490318
cg2703	Sugar	Sugar											81651			62074,5
cg2704	ABC-type	ABC-type						581266		488009	432531	564622		1240000	392933	1430000
cg2707	conserved	conserved		6760000	3580000	8000000	3210000	4390000	4860000	3150000	8320000	2570000	11900000	3580000	3520000	2060000
cg2709	Putative	Putative				1410000	1060000	1020000	1110000	864843	2820000	1460000	874827	2290000	596426
cg2715	conserved	conserved					256225	118664	10699,8	157227	207556	102242		96477,2	89611,5	310724
cg2717	Short-chain	Short-chain			1400000	1240000	1340000	878110	1850000	1540000	0	0	0	1020000	596190	2020000
cg2719	PUTATIVE	PUTATIVE					8328,73								16158,9	7910,13
cg2735	putative	putative		205000000	431000000	278000000	473000000	281000000	365000000	419000000	254000000	135000000	133000000	282000000	267000000	192000000
cg2737	Bacterial	Bacterial					37190,9							20018,7
cg2746	putative	putative											188421		17515,9
cg2747	SECRETED	SECRETED			22000000	9010000	4520000	13700000			5220000	8770000	12600000	6390000		1040000
cg2748	putative	putative		941025	473674	851472	1620000	1190000	1390000		973354	455621	721670	1650000	1200000	764557
cg2750	putative	putative			7870000							5240000	8290000		7120000	7630000
cg2751	Xanthosine	Xanthosine		4110000	6610000	3700000	4150000	2910000	6540000	3540000	6530000	4870000	9000000	5730000	2150000	10500000
cg2758	putative	putative				1270000	177903						421188	343901	109246	67092
cg2761	Metal-dependent	Metal-dependent		4760000	4230000	5990000	4190000	6040000	5690000	8230000	5800000	6530000	8840000	6500000	5670000	6620000
cg2765	putative	putative		7110,88			10668	18473,2		12900,9				10605
cg2766	Bacterial	Bacterial		731676	1390000	889305	767191	2550000	1360000	2480000	1840000	1900000	511282	693641	803529	153533
cg2768	L-aminopeptidase/D-esterase	L-aminopeptidase/D-esterase		37786,2		61297	0	0	0	0	28877,6	118499	147661	0	0	0
cg2770	conserved	conserved		28500000	32300000	22200000	28000000	30100000	15500000	19400000	18300000	25200000	17900000	11800000	19100000	7730000
cg2772	conserved	conserved					525207	375878				331260	202918		68731,5
cg2773	Uncharacterized	Uncharacterized		13000000	12900000	30000000	37800000	19000000	19900000	20400000	23400000	22100000	14900000	11900000	17200000	15100000
cg2774	Nicotinic	Nicotinic		18700000	11400000	25300000	20700000	10700000	15300000	29600000	8120000	11400000	9030000	10400000	16000000	7030000
cg2778	conserved	conserved		924636	1050000	625530	551051	586585	931347	392669	679788	732532	1040000	399146	431296	421322
cg2783	Bacterial	Bacterial		6000000	7040000	7880000	8300000	6120000	5350000	7490000	11400000	8860000	7630000	7190000	6740000	11000000
cg2791	Ribosomal	Ribosomal		268000000	175000000	289000000	236000000	236000000	461000000	244000000	730000000	179000000	668000000	307000000	221000000	324000000
cg2794	conserved	conserved		12700000	12400000	12600000	10800000	27100000	12900000	16400000	12900000	13000000	11000000	11400000	14100000	15000000
cg2795	NADPH	NADPH		8350000	13400000	10400000	11400000	7600000	10900000	9650000	12600000	7340000	7370000	10500000	8150000	5450000
cg2796	MMGE/PRPD	MMGE/PRPD		356838	919787	292222	0	0	0	0	682176	977021	749269	0	0	0
cg2797	conserved	conserved		354533	295693	378603	369746	438238	205795	140643	170842	286905	36842,5	180789	244141	226223
cg2803	conserved	conserved		1700000	1950000	2280000	3220000	2800000	1130000	1880000	3020000	1340000	2900000	2350000	2770000	712189
cg2810	Na+/H+-dicarboxylate	Na+/H+-dicarboxylate		126876	301230	346552	661156	419692	414441	125311	0	0	0	354176	1870000	712460
cg2811	ABC-type	ABC-type					432735		221647					379833		322452
cg2812	ABC-type	ABC-type		9930000	8810000	11500000	9090000	9400000	10700000	5260000	8330000	9750000	6990000	11600000	6970000	7200000
cg2831	Bacterial	Bacterial		3010000	2190000	2290000	3580000	2670000	1540000	2700000	3680000	6250000	2790000	8070000	5420000	6730000
cg2835	Predicted	Predicted		240000000	293000000	649000000	355000000	441000000	526000000	235000000	410000000	436000000	548000000	221000000	114000000	167000000
cg2838	Predicted	Predicted		4790000	6700000	6600000	13600000	9330000	5610000	5420000	7170000	9970000	8370000	4820000	8500000	9880000
cg2841	Predicted	Predicted		3670000	2670000	2020000	3150000	2480000	1830000	2460000	3790000	2460000	2380000	2870000	2700000	3220000
cg2847	GCN5-related	GCN5-related		36400000	49200000	34600000	32300000	46800000	33100000	53000000	24200000	24600000	14200000	17200000	42400000	22500000
cg2848	putative	putative		439737	260580	322853	182268	173943		131066	273064	184233	392279	240731	137115	60935,5
cg2849	Predicted	Predicted		277034	1480000	417914	563865	625670	396016	590706	971606	1850000	1100000	1220000	353086	364452
cg2850	conserved	conserved		16900000	18700000	25300000	26700000	30000000	34400000	36100000	46600000	54800000	27200000	57100000	36600000	30500000
cg2851	Branched-chain	Branched-chain		1100000	2060000	1040000	2850000	1940000	2520000	2220000	1500000	1250000	1610000	1130000	6230000	3500000
cg2852	PUTATIVE	PUTATIVE		22500000	24900000	22100000	28000000	17500000	20900000	17800000	27000000	19200000	24500000	32600000	23400000	25300000
cg2853	conserved	conserved		84500000	94800000	130000000	50600000	198000000	148000000	93600000	86500000	104000000	74500000	69000000	42600000	33200000
cg2859	conserved	conserved		2080000	1530000	1440000	1030000	1700000	1340000	1620000	1580000	3000000	3000000	1610000	2200000	3050000
cg2860	PUTATIVE	PUTATIVE		26400000	19100000	18000000	12600000	19900000	29400000	13500000	18500000	19300000	20700000	30700000	13500000	31800000
cg2869	Predicted	Predicted					39516,8
cg2877	AMINOTRANSFERASE	AMINOTRANSFERASE		529860		688145	1200000	595157	1630000	881321	678827	1440000	2040000	3450000	1230000	2320000
cg2880	HIT	HIT		2320000	2890000	2020000	1700000	1930000	2390000	1740000	1670000	2150000	1640000	1020000	1420000	1530000
cg2883	SAM-dependent	SAM-dependent					247803	343315	428439					297037	613153	219401
cg2889	Bacterial	Bacterial			140169	32646,4	46338,8	100297	33406,9	119037	56380,6	55745,5		28168,9	175305
cg2890	PUTATIVE	PUTATIVE		176158	380226	199043	358629	739622	406852	463671	524518	460741	735050	559827	310673	782318
cg2894	Bacterial	Bacterial		746664	459430	348798	491136	271213	570524	673796	303026	817927	671228	299382	234904	870703
cg2896	putative	putative		20300000	21700000	22100000	12400000	24400000	32300000	18900000	18600000	26600000	26400000	15600000	7030000	10500000
cg2901	Putative	Putative		615497	452088	488720	376588	706147	392068	600154	927795	521673	494051	1100000	604569	604588
cg2902	Predicted	Predicted		162000000	113000000	77900000	159000000	78200000	61900000	102000000	87600000	97800000	65300000	54800000	83700000	51000000
cg2903	hypothetical	hypothetical		3250000	2420000	8720000	1810000	9610000	2710000	9700000	1650000	1930000	2900000	1150000	3790000	2200000
cg2904	hypothetical	hypothetical		592590	306923	631507	258255	321325	272181			539925	402276		834318	776030
cg2906	conserved	conserved		2680000	2380000	1400000	2320000		1470000	3170000	3340000	7600000	1410000	801066	729593	954549
cg2910	Transcriptional	Transcriptional		2030000	3320000	3540000	4220000	2140000	2150000	4500000	3000000	5020000	4060000	3300000	2130000	2430000
cg2911	ABC-type	ABC-type		19300000	24300000	43600000	15900000	19600000	36600000	11500000	50000000	34100000	38700000	27000000	9730000	23600000
cg2912	ABC-type	ABC-type		4800000	4340000	2920000	5390000	4730000	3770000	3830000	3640000	4720000	4340000	3920000	4080000	6940000
cg2923	PUTATIVE	PUTATIVE		8820000	8140000	10800000	16100000	8130000	7360000	9420000	20800000	19400000	13300000	19700000	11600000	9220000
cg2932	Transcriptional	Transcriptional		29000,8		99038,3	175302	67828,9	46213,5	254647	68096,6		207655	118535	75144,6	46159,8
cg2936	Bacterial	Bacterial		3110000	4090000	3850000	2420000	2550000	1670000	3350000	1370000	2450000	2060000	1730000	9880000	3690000
cg2937	ABC-type	ABC-type		5260000	6120000	7990000	10100000	6720000	16000000	6870000	12500000	15200000	13400000	9190000	5080000	5450000
cg2939	ABC-type	ABC-type			8054,86	12788,9	17677,3		12711,8	10259,7	14821,6	15575,5	9912,78	12663,5	11680,9	20125,4
cg2940	ATPase	ATPase		406764		918507	815675	528498	149012	384229	109535		314210	334227	247767	1200000
cg2946	CarD-like	CarD-like		20800000	26600000	18400000	29400000	18000000	26800000	17300000	23500000	32600000	26200000	17400000	21200000	16000000
cg2949	putative	putative		15300000	17100000	16600000	13900000	28300000	23700000	13600000	11600000	15300000	21900000	7940000	14200000	15500000
cg2951	Predicted	Predicted		2490000	2640000	2120000	3570000	1900000	2680000	2620000	2670000	2770000	2420000	3270000	2270000	3520000
cg2952	putative	putative		7220000	2090000	11400000	1290000	14400000	2640000	5230000	999336	1090000	1120000	955834	11400000	1720000
cg2956	putative	putative				42972,7								141056		6714,13
cg2957	conserved	conserved		20900000	20800000	78700000	47500000	46900000	38000000	19800000	21300000	25200000	34800000	17600000	61400000	8250000
cg2962	Uncharacterized	Uncharacterized		159000000	132000000	175000000	25500000	122000000	121000000	100000000	115000000	84700000	48800000	52100000	26700000	18500000
cg2968	conserved	conserved			647501		130245	137259	49499,4			91523,9	46426,4	151312	67446	117724
cg2969	similar	similar		500517	682368		296195	841220	498106	527378	711026	545626	836180	1150000	395358	546509
cg2970	conserved	conserved		84518,1		109833	107456		97831		167054	116194		132962	39493,4	238355
cg2976	conserved	conserved		1590000	1480000	1430000	1250000	1070000	2270000	3320000		881788	4310000	2490000	1660000	1060000
cg2977	putative	putative		21600000	38100000	50100000	12100000	20500000	22200000	23200000	15900000	17300000	7630000	11200000	12200000	35300000
cg2991	putative	putative													14487,7
cg2992	putative	putative		461946	564311	903753	880259	402486		559140	546424	507072	710643	422875	471790	224362
cg2993	conserved	conserved		530052	473717	913318	1180000	816240	678829	779496	805139	636651	772843	426217	1190000	436450
cg2994	putative	putative		9850000	25200000	16900000	19200000	14600000	20900000	24100000	12900000	16600000	17000000	12300000	15300000	12700000
cg2999	PUTATIVE	PUTATIVE		5540000	8000000	7560000	9860000	4820000	6620000	10100000	5450000	5220000	5490000	5410000	5180000	9110000
cg3000	Rhodanese-related	Rhodanese-related		805000000	641000000	932000000	454000000	856000000	362000000	347000000	339000000	298000000	547000000	323000000	270000000	431000000
cg3001	hypothetical	hypothetical		8450000	16700000	13000000	2910000	6830000	12200000	7980000	5060000	2000000	2970000	2720000	17800000	7300000
cg3012	putative	putative		648057	3770000	1740000	3090000	1320000	863167	1780000	2630000	898468	1630000	619697	7230000	548636
cg3013	hypothetical	hypothetical		206088	319185	147895	218418	501828	245932	319749	645859	454464	395600	591769	382773	471265
cg3014	hypothetical	hypothetical		7900000	7750000	9190000	5610000	5820000	6350000	5220000	6350000	4700000	8030000	6260000	5570000	4220000
cg3015	hypothetical	hypothetical		1990000	211999	343408	351221	459001	175574	1340000	345666	650106	638569	648081	1040000	1660000
cg3016	hypothetical	hypothetical		3010000	1880000	2190000	2070000	2600000	1850000	2250000	1810000	2070000	2160000	3470000	2160000	2560000
cg3017	putative	putative		3060000	3100000	4160000	2760000	2530000	3460000	3260000	2700000	3560000	4630000	3690000	5720000	12200000
cg3018	hypothetical	hypothetical		6200000	8670000	6880000	5820000	10600000	7600000	8280000	10800000	11200000	12200000	9130000	9050000	10400000
cg3019	putative	putative		6190000	6250000	7910000	4680000	9080000	7920000	8150000	8110000	8520000	14100000	6830000	5500000	7240000
cg3021	Peptidase	Peptidase		4150000	5960000	7490000	9570000	3840000	6780000	4860000	4290000	7870000	5660000	3910000	4290000	4400000
cg3030	Predicted	Predicted		3990000	2210000	2120000	5500000	2230000	6350000	7190000	6210000	8360000	7740000	3800000	6080000	8830000
cg3031	conserved	conserved		1490000	871024	899612	1250000	755432	1010000	2670000	1690000	2140000	2690000	2440000	1660000	2890000
cg3032	putative	putative		2110000	2340000	2310000	3940000	2180000	4950000	2110000	2160000	4130000	3230000	2700000	4740000	1420000
cg3033	conserved	conserved			4790000	1530000		13700000	6890000	783335	2160000	2000000	5250000	1070000	3860000
cg3035	acetyltransferase	acetyltransferase		3620000	1570000	1400000	3250000	1990000	2880000	1440000	2990000	1010000	1190000	2210000	2040000	1840000
cg3040	Predicted	Predicted		5000000	1010000	1590000	1130000	1050000	1050000	2550000	1430000	714597	2560000	505956	824829	2570000
cg3042	ABC-type	ABC-type		5800000	6140000	7490000	7400000	5120000	4200000	5580000	9560000	9040000	7680000	7900000	7630000	5410000
cg3043	NTP	NTP		2920000	7450000	5140000	3020000	4560000	4530000	2920000	2800000	4900000	4120000	1390000	3000000	2260000
cg3044	putative	putative		780456	993301	1450000	736112	552663	2750000	327786	341553	506404	402881	316966	489964	680062
cg3045	ABC-type	ABC-type		1070000	2370000	2550000	1540000	1060000	2780000	1270000	845733	1350000	1680000	631655	2490000	1510000
cg3050	acyltransferase	acyltransferase		56100000	57500000	41000000	35600000	57300000	47800000	57700000	48500000	44400000	37600000	54600000	48600000	59400000
cg3051	putative	putative		252145	269636	584748	147103			301874	156953			569748		81493,5
cg3057	putative	putative		6530000	5180000	7030000	2050000	5350000	4290000	4030000	4090000	3420000	12500000	2570000	2060000	5370000
cg3065	conserved	conserved		1080000	480936		1120000	337250	771354	486016	972399	689707	1590000	812440	1540000	1280000
cg3067	putative	putative		1030000		141362	167491	1150000	899445	462271	161445	104203	100967	920274	463357	3010000
cg3069	conserved	conserved		827806	628182	1080000	1250000	512135	1760000	594596	1270000	900866	2020000	1020000	2080000	1950000
cg3070	SPOU	SPOU		0	0	0	734796	424403	443639	358787	0	0	0	260094	447865	1170000
cg3072	putative	putative		28400000	44100000	29500000	36400000	22700000	33400000	36900000	23500000	22900000	35500000	19000000	30400000	18600000
cg3074	Predicted	Predicted				154385	243287	834395			834265	939069	776905	927988	575546	192309
cg3078	hypothetical	hypothetical		173685	290354	217015						1140000	160962	179875	119674	419701
cg3080	Na+/glutamate	Na+/glutamate		0	0	0	0	0	0	0	0	0	0	9370000	3460000	6220000
cg3084	Predicted	Predicted		74548,3	59010,3	39417,6	34508	95480	66668,2	97103,8	69737,1	104058	98516,8	95118,3	76259,7	77310,4
cg3085	ALKANAL	ALKANAL		1690000	2260000	2170000	5450000	4090000	5790000	4020000	3670000	4380000	2750000	2230000	2730000	1810000
cg3090	conserved	conserved		550646	1430000	601574	793715	768573	757224	741359	542976	505426	466687	659104	810272	359378
cg3092	2-polyprenylphenol	2-polyprenylphenol		6040000	8330000	3760000	3180000	3960000	4100000	4320000	5270000	3300000	12100000	3690000	2460000	7150000
cg3093	Carbon-nitrogen	Carbon-nitrogen		0	0	0	1030000	1350000	1870000	1370000	2090000	2150000	1090000	2430000	2650000	1900000
cg3096	ALDEHYDE	ALDEHYDE		69000000	67200000	56200000	125000000	97300000	86900000	78200000	77600000	98200000	57700000	89200000	66600000	60400000
cg3101	Predicted	Predicted			930749	533723	704336	309277	319392	420096	550152	745673	635877	733770	677076	917844
cg3103	conserved	conserved				98102					151478	227974				219499
cg3104	ATPase	ATPase		570509	386013	572972	635354	457502	452139	814908	805361	680009	747630	932466	843046	1300000
cg3105	hypothetical	hypothetical		208164	303229	185985	245510	286855	270181	173250	485846	682073	1270000	179118	168086	99466,5
cg3106	conserved	conserved			470629	374580	630257	556897	816405	778046	624772	508491	487242	991499	1710000	492571
cg3113	conserved	conserved									318004	331215		875216	1440000	2100000
cg3117	conserved	conserved									11965,6		10960,7
cg3120	conserved	conserved		883183	996310	1270000	1100000	1360000	1370000	1210000	2010000	968541	2050000	928714	1380000	1300000
cg3127	putative	putative		1510000	2590000	2660000	1380000	1260000	1130000	1380000	1370000	1370000	937621	687482	374816	598231
cg3128	ABC-type	ABC-type
cg3129	ABC-type	ABC-type				2502,97			3907,46	3763,36					8939,49
cg3131	Acetylornithine	Acetylornithine		672363	403635	420573	400296	909143	264323	501286	534566	742476	408229	873302	478340	619915
cg3132	putative	putative		3260000	4220000	42200000	2750000	18900000	48000000	9700000	8030000	5920000	7870000	4610000	18500000	9200000
cg3133	ABC-type	ABC-type													9748,02	15807
cg3138	Membrane	Membrane		1740000	2260000	2010000	2200000	3650000	3470000	3010000	2910000	3750000	1510000	4630000	1840000	2980000
cg3139	conserved	conserved		213145	355966	223602	162977		279556	129600	316736	256081	143849	137647	106591	113679
cg3142	putative	putative		5870000	5000000	7550000	5990000	4810000	2950000	2410000	2980000	3040000	3910000	2140000	2300000	2670000
cg3143	putative	putative		211513	189534	290063	330550	596047	239145	304104	356290	520500	599537	438958	351400	216294
cg3149	Aminotransferases	Aminotransferases		3130000	4350000	1680000	1850000	2110000	1470000	2070000	1620000	1990000	1370000	1520000	4020000	1740000
cg3153	putative	putative		405316	357831	583468	928464		249142	710854	824666	685064	952158	843221	1100000	1480000
cg3157	putative	putative		13800000	17100000	22400000	17300000	25100000	28200000	24700000	20000000	20000000	14900000	16200000	13700000	22600000
cg3159	Universal	Universal		52500000	64100000	59600000	113000000	39300000	64100000	39500000	30500000	56800000	33200000	29200000	16400000	18700000
cg3160	putative	putative						111693		89685,1	202267		262506	120242	67082,6	141009
cg3161	putative	putative						787143		1070000	744932			449437	929723	1220000
cg3164	putative	putative		43875,8	64839,2		44368,2	49840,4	83561	37149,9	42069,7		43147,2	47554,2	43660,2	12562,5
cg3166	glycosyltransferase	glycosyltransferase		1080000	2100000	1630000			1360000		2180000	3160000	2770000	4370000	975036	870342
cg3167	hypothetical	hypothetical		2570000	3170000	5240000	2720000	5450000	5660000	4880000	2850000	4150000	3480000	3340000	7430000	3670000
cg3168	SAM-dependent	SAM-dependent			15896,5		4291,13	7780,44	6416,48		20033,1	9601,14		15676,9	14096,9	14564,2
cg3172	SAM-dependent	SAM-dependent		69000000	94900000	71900000	63700000	72400000	56400000	75600000	34800000	50300000	49700000	40400000	121000000	62500000
cg3173	conserved	conserved		228668	238202	541564	257360	1040000	241450	341303	682874	351717	138151	168295	164234	187429
cg3180	putative	putative		42050,9		66410,8	80758	158787		44156,8	138879		134753	66887,6	39591,9	122492
cg3181	putative	putative				2010000	732490	3610000	209950	2050000	173978	232920	199335	208786	1660000
cg3187	putative	putative				290234	740250	486184	1530000	834242	843868	1210000	245510	2110000	558326	337853
cg3191	Predicted	Predicted		8910000	3930000	5090000	6690000	4630000	6800000	3040000	3710000	4000000	5770000	5530000	3570000	8540000
cg3192	putative	putative		9010000	15900000	19500000	16800000	13400000	20800000	12700000	10100000	12000000	12300000	9170000	13400000	7880000
cg3195	Flavin-containing	Flavin-containing		40500000	31200000	36800000	24900000	35000000	36400000	38000000	27900000	31200000	45700000	26200000	28100000	44000000
cg3199	Predicted	Predicted		1690000	1300000	3210000	2940000	4300000	1260000	3920000	964606	1120000	836774	1350000	1010000	1350000
cg3200	ACYLTRANSFERASE	ACYLTRANSFERASE		10700000	9290000	6150000	9150000	4210000	6090000	9500000	3360000	3960000	11000000	7710000	3810000	5440000
cg3202	Bacterial	Bacterial		4780000	4960000	2600000	2320000	2880000	2410000	2520000	2570000	1670000	2880000	2610000	2410000	6100000
cg3203	conserved	conserved														50605,1
cg3204	conserved	conserved		369917	583623	1100000	321622	377592	571728	241424	160397	289706	727440			496468
cg3206	PHOSPHOGLYCERATE	PHOSPHOGLYCERATE		932031	898718	1640000	3420000	1200000	1020000	1450000	1340000	1010000	721499	852549	863936	2440000
cg3210	cell	cell		951549	2750000	3180000	2760000	2230000	3230000	2040000	1900000	2010000	1660000	2330000	3230000	2480000
cg3212	putative	putative		4250000	7730000	7170000	7560000	15400000	4370000	3610000	2930000	3660000	4850000	1970000	1900000	4820000
cg3213	putative	putative		5070000	6870000	18100000	3370000	6900000	5850000	7060000	7180000	4390000		7440000		15200000
cg3214	conserved	conserved		47500000	28700000	26600000	29400000	23900000	20400000	34700000	33600000	27200000	28300000	33000000	32300000	37100000
cg3218	PYRUVATE	PYRUVATE		2480000	2360000	2540000	3080000	3000000	3360000	1290000	1990000	2120000	3380000	2850000	2440000	4450000
cg3221	Predicted	Predicted		229196	129413	188129	295630		134377	1060000	271984	228134	494730	144637	149797	139036
cg3223	NADPH-dependent	NADPH-dependent		3070000	2690000	2580000	4670000	12100000	2910000	16500000	9360000	9160000	883094	4000000	3700000	2140000
cg3224	Bacterial	Bacterial		5000000	4520000	2690000	2300000	2430000	3160000	3850000	3420000	3570000	4120000	2780000	2990000	2600000
cg3226	permease	permease		14000000	4140000	23300000	3340000	6510000	2600000	3370000	1890000	6190000	5240000	4840000	3310000	8140000
cg3228	hypothetical	hypothetical											1540000	1340000	504267	1750000
cg3230	putative	putative		1010000	1590000	257431		2050000	2460000	1570000	727083	623862	1300000	785470	1110000	1490000
cg3232	SECRETED	SECRETED		1150000	1120000	1800000	738403	1320000	1610000	881650	1960000	1330000	1800000	771655	947472	527598
cg3233	hypothetical	hypothetical				116338	449220		230078	110322	52483	133970	59429,1	96501,9	50443,2
cg3239	hypothetical	hypothetical			44043,9	57482	51656,4	104042	54647,4	74792,8	57532,1	67504,2	24541,4	24629,5	59662,4	40165,4
cg3243	Predicted	Predicted			84599,2	443267	178822	254162	164498	231163	250996	145730	146484	476121	288262	401327
cg3244	conserved	conserved		90000000	158000000	143000000	115000000	108000000	128000000	171000000	91900000	151000000	105000000	95300000	86300000	75300000
cg3246	Bacterial	Bacterial		54761,9	122564		475916	130330	125083	128773	304958	101793	106085	509582	279834	73699,1
cg3249	putative	putative					21035,1				28153,9			59817
cg3251	putative	putative		339242	126023	232104	183934	482496	273315	227631	461062	321374	512500	588827	238352	323248
cg3261	Bacterial	Bacterial					20442,1								12483,1
cg3263	conserved	conserved		4470000	5940000	7190000	7320000	4680000	5790000	7240000	6150000	4810000	4840000	1860000	9810000	2640000
cg3264	conserved	conserved		174000000	301000000	338000000	193000000	227000000	238000000	267000000	185000000	139000000	172000000	112000000	108000000	95500000
cg3273	hypothetical	hypothetical		515476	613669	577022	334790	457448	621504	126841	1030000	458164	726479	374401	163231	325945
cg3277	Uncharacterized	Uncharacterized		3770000	7260000	4190000	7130000	5710000	5930000	10100000	4330000	7040000	6050000	5980000	4420000	6110000
cg3281	PROBABLE	PROBABLE						357998						162963	872057	617448
cg3287	secreted	secreted												7053,27		970396
cg3290	PROBABLE	PROBABLE		6780000	6880000	8870000	12200000	6410000	13400000	4990000	16800000	10300000	6000000	4500000	4520000	4220000
cg3292	Copper	Copper		107000000	132000000	186000000	66200000	178000000	137000000	77700000	117000000	89800000	105000000	54300000	35700000	41200000
cg3293	hypothetical	hypothetical		25000000	24100000	37400000	29400000	72200000	42500000	25100000	38500000	47200000	60100000	21400000	13900000	29100000
cg3295	Cation	Cation		918938	413726	447982	469947	1680000	1210000	745650	295531	280552	527460	325777	910991	916107
cg3301	Permease	Permease		0	0	0	52232,6				0	0	0	252210		744222
cg3303	Transcriptional	Transcriptional							199825			251535
cg3312	putative	putative						869054		838904			597179		646288	525565
cg3315	Bacterial	Bacterial		20800000	23500000	40100000	18600000	32600000	41600000	37300000	36900000	24900000	35400000	18200000	30000000	15600000
cg3316	Universal	Universal		332088	1360000	1180000	1240000	1480000	762045	1290000	439035	381557	461758	407663	1970000	1790000
cg3317	putative	putative				320920			335126		448096	262582	350338		213602	416657
cg3318	Uncharacterized	Uncharacterized		801000000	996000000	1470000000	512000000	814000000	1170000000	634000000	749000000	982000000	1400000000	326000000	207000000	285000000
cg3319	Uncharacterized	Uncharacterized		1180000	791784	840403	1880000	1250000	1580000	1660000	1290000	2760000	1520000	2100000	2580000	2070000
cg3320	ABC-type	ABC-type		3110000		2880000			1570000	2740000					8840000
cg3321	ABC-type	ABC-type			48924,8	194771	286053	49464,6	127360				33838,7	110657	213516
cg3322	putative	putative		2490000	2970000	2600000	2260000	3220000	2350000	1750000	3220000	3480000	3370000	2790000	2160000	2690000
cg3323	Myo-inositol-1-phosphate	Myo-inositol-1-phosphate		3780000	2950000	6090000	3110000	2290000	3370000	2140000	3750000	5120000	3700000	3110000	1630000	3070000
cg3324	putative	putative		523521	236575		390967	1460000	1110000	1170000	431734	289809	917584	694196	952149	977506
cg3325	conserved	conserved		1960000	1410000	1290000	1430000	1700000	995960	1090000	1510000	1270000	1490000	2350000	2780000	3770000
cg3329	conserved	conserved		344051	229489	205684	429300	168206	206161	305181	373290	240060	386342	358931	312379	304589
cg3332	PUTATIVE	PUTATIVE		1510000	3120000	2140000	1010000	1140000	847080	943986	414440	1600000	1070000	375630	611720	1950000
cg3342	putative	putative						13451,4	14867,4		18061,6	16959,4		19728,6
cg3344	Nitroreductase	Nitroreductase		7030000	8590000	5800000	8940000	7570000	6600000	8220000	9690000	8860000	7150000	13700000	12200000	13300000
cg3345	hypothetical	hypothetical					8448,48					16582,7	11267,9		12889,2	6471,93
cg3348	Putative	Putative		2150000	1610000	2010000	922107	2370000	2610000	2350000	1370000	2060000	3200000	2850000	3650000	3530000
cg3349	conserved	conserved		4220000	3800000	4450000	5560000	4480000	2540000	3740000	7770000	11500000	4310000	9520000	2600000	3810000
cg3367	ABC-type	ABC-type					199507			59006,9	100184	108305	152608	367606	45914,2	266728
cg3370	PUTATIVE	PUTATIVE		959031	776692	728006	821480	585578	903935	654449	996162	638482	666685	773554	649362	891378
cg3373	Bacterial	Bacterial		1540000	4370000	1320000	1340000	5940000	5340000	6160000	2290000	2440000	2450000	1760000	1350000	3810000
cg3374	PUTATIVE	PUTATIVE								234877			135474	128758	98606,6	137188
cg3375	Predicted	Predicted		552347	163219		247828	200309	133484	385996	300107	247961	429277	378227	135762	177425
cg3380	PUTATIVE	PUTATIVE		263878	131736	101033		146000	170618		197142	121503	91038,1	168812	143276
cg3384	Bacterial	Bacterial				571216	647789	475575		248376	623798			154253	210702
cg3389	Predicted	Predicted		15300000	23600000	15500000	16200000	19600000	17000000	23500000	18000000	25100000	25600000	15900000	9590000	10200000
cg3390	Sugar	Sugar		3020000	4210000	1810000	1770000	883629	4940000	900286	1650000	4620000	2060000	1190000	1530000	786109
cg3393	putative	putative		274716	185310	210366		330104	275338	298590	172255	202173	177533	111519	113798	214077
cg3396	Membrane	Membrane		816590	1060000	933604	916504	990157	844182	1110000	635262	741754	610320	467074	756257	562229
cg3398	DNA	DNA		1590000	2440000	2730000	1460000	2600000	1490000	1380000	1950000	2650000	2500000	2520000	1320000	3290000
cg3404	ABC-type	ABC-type		29600000	38600000	31300000	56300000	31800000	37400000	42700000	17200000	18900000	24600000	22200000	46800000	33200000
cg3405	NADPH	NADPH		5250000	4830000	3240000	6120000	4740000	3680000	5210000	4330000	4110000	4090000	5600000	5670000	5030000
cg3407	putative	putative												167121	281999
cg3408	hypothetical	hypothetical					21377,8						27126
cg3411	Copper	Copper						2730000	3700000		2790000	6660000	4090000			3420000
cg3414	Putative	Putative		28600000	45300000	33000000	41900000	24200000	50100000	20200000	23300000	36900000	29500000	22200000	53400000	43600000
cg3417	NTP	NTP		963502	2230000	1580000	2290000	1590000	1680000	1930000	977821	938658	1410000	2860000	1820000	938293
cg3418	putative	putative		331633	288295	285073	358698	321870	276386	478866	254679	299487	280100	262632	436510	226629
cg3419	Uncharacterized	Uncharacterized		326485	543919		514433	385505	554415	492055	619258	680672	332982	863737	530585	889054
cg3425	conserved	conserved		322593	317659	353558	386178	288471	227284	389992	278524	401287	139400	429309	211731	274122
cg3429	Preprotein	Preprotein				3350000		1230000	971238	584898		289610		904326		434084
cg4005	putative	putative		9850000	11600000	3220000		11200000	9400000	10900000	14100000	11800000		6590000
cgtR10	putative	putative		568543	1060000	711693	665948	561216	848954	759465	1700000	665806	710708	635203	686687	447562
cgtR11	putative	putative		24600000	16000000	24500000	13800000	11200000	14300000	13900000	16500000	17000000	17100000	18100000	10800000	9180000
cgtR2	putative	putative		512384	407950	559082	444630	437636	198853	180791	1580000	264035	192472	234733	208982	289248
cgtR3	putative	putative		7740000	8730000	8450000	14800000	8590000	6950000	7970000	6260000	8010000	7650000	6780000	17900000	6880000
cgtR4	putative	putative		5670000	3300000	3640000	7730000	8830000	4760000	8580000	6360000	5090000	5260000	5120000	8250000	7500000
cgtR5	putative	putative		5940000	4440000	4340000	9590000	3870000	3790000	3440000	7670000	4040000	4320000	3110000	1710000	2390000
cgtR6	putative	putative					18507			20330,6		25662,7	34047,3	31879,8	29859,2	33432,2
cgtR7	putative	putative		5500000	4910000	2540000	5440000	5420000	8490000	7070000	5230000	6170000	6680000	5910000	3970000	2500000
cgtS1	PROBABLE	PROBABLE							20124,6		28869,3	27583,3		15055,6		13165,2
cgtS11	probable	probable		2720000		941750	898800		3310000		708146	710038	1080000	772701	1200000	1460000
cgtS2	probable	probable		16400000	19000000		15300000	35600000	22100000						8150000
cgtS3	probable	probable		2320000	3240000	6570000	6100000	3010000	2390000	2430000	4920000	1410000	6840000	7520000	7720000	2900000
cgtS4	probable	probable		1630000	1110000	832311	1060000	1310000	619643	1760000	991909	1590000	1370000	1540000	1130000	1280000
cgtS5	probable	probable							15028,9	40474,8	12522,7		16576,4	5802,88	20978,9	14784,1
citB	TWO-COMPONENT	TWO-COMPONENT		887264	890138	714642	762943	526716	609754	2080000	1080000	1550000	921665	789409	1940000	610573
citE	CITRYL-COA	CITRYL-COA		4420000	2180000	2330000	2560000	2550000	2760000	2050000	3800000	4080000	4870000	2140000	1200000	3750000
clpB	PROBABLE	PROBABLE		59600000	77300000	112000000	123000000	85200000	116000000	80200000	90100000	57600000	53500000	71400000	59700000	47900000
clpC	PROBABLE	PROBABLE		82900000	111000000	109000000	109000000	86800000	94800000	106000000	102000000	88700000	105000000	96100000	132000000	73300000
clpP1	ATP-DEPENDENT	ATP-DEPENDENT		49400000	48300000	41100000	28900000	55600000	29800000	41200000	35200000	44000000	41700000	39400000	47800000	47300000
clpP2	ATP-DEPENDENT	ATP-DEPENDENT		37300000	44900000	48300000	70100000	37300000	53600000	38400000	39700000	37000000	38000000	48600000	53100000	44500000
clpX	PROBABLE	PROBABLE		4820000	3140000	4810000	3490000	6200000	4130000	5780000	4830000	4420000	2520000	8620000	6580000	11000000
cmk	CYTIDINE	CYTIDINE		7050000	6200000	4810000	6770000	5740000	4450000	6280000	5640000	5580000	8660000	7470000	3910000	7440000
cmt1	Trehalose	Trehalose		679000000	778000000	1390000000	525000000	1420000000	1290000000	592000000	1180000000	1160000000	1080000000	665000000	331000000	551000000
cmt2	Trehalose	Trehalose		887000000	649000000	921000000	443000000	913000000	599000000	615000000	924000000	957000000	978000000	676000000	506000000	587000000
cmt3	corynomycolyl	corynomycolyl		22300000	28400000	42600000	21300000	42700000	42200000	29200000	54600000	39500000	36000000	30100000	21000000	24700000
cmt4	corynomycolyl	corynomycolyl		22000000	27800000	42800000	15300000	38500000	73800000	18900000	47800000	63200000	73500000	30800000	35800000	55100000
cmt5	corynomycolyl	corynomycolyl		12500000	22600000	18000000	13400000	26700000	19400000	16300000	27300000	39500000	36200000	18700000	12100000	12700000
coaA	PANTOTHENATE	PANTOTHENATE		0	0	0	0	0	0	0	0	0	0	137067	98541,5	122250
coaD	PHOSPHOPANTETHEINE	PHOSPHOPANTETHEINE		184714	145805	77988,8	0	0	0	0	0	0	0	0	0	0
cobA	UROPORPHYRINOGEN	UROPORPHYRINOGEN		2250000	2230000	1850000	2140000	2480000	2860000	1960000	3010000	3420000	3470000	3860000	3330000	5070000
cobL	PRECORRIN-6Y	PRECORRIN-6Y		4100000	3640000	2440000	2040000	1860000	2310000	2240000	1920000	1920000	2650000	2170000	1570000	1710000
cobQ	COBYRIC	COBYRIC		10900000	7270000	14100000	8510000	6050000	6120000	7140000	10200000	7020000	6720000	6690000	7250000	18000000
cobT	PROBABLE	PROBABLE		1500000	2530000	12000000	5530000	1460000	1550000	2060000	6350000	2360000	2620000	3670000	3700000	1660000
cop1	Trehalose	Trehalose		169000000	236000000	318000000	157000000	240000000	240000000	192000000	199000000	192000000	235000000	133000000	146000000	131000000
cps	NON-RIBOSOMAL	NON-RIBOSOMAL		502135	323231	578762	459507	343222	311573	286255	902317	282951	256201	307236	191939	297872
crtE	geranylgeranyl-pyrophosphate	geranylgeranyl-pyrophosphate		0	0	0	0	0	0	0	0	0	0	555306	423499	1280000
cspA	COLD-SHOCK	COLD-SHOCK		634000000	1160000000	1360000000	834000000	2010000000	1850000000	1000000000	2430000000	2060000000	2410000000	1520000000	822000000	1270000000
cspA2	COLD-SHOCK	COLD-SHOCK		155000000	74900000	109000000	48700000	99100000	95800000	40500000	87900000	91400000	172000000	62200000	44700000	51900000
cstA	PUTATIVE	PUTATIVE		860186	623678	864529	1330000	1030000	890446	741012	1340000	825118	1700000	666650	1190000	2030000
ctaC	CYTOCHROME	CYTOCHROME		4620000	5440000	5670000	6730000	5400000	7440000	5060000	5230000	5320000	7380000	4660000	6610000	6550000
ctaD	PROBABLE	PROBABLE		5200000	5780000	15400000	4560000	4610000	13500000	5810000	5800000	4180000	14600000	6010000	5650000	14800000
ctpC	Cation	Cation		803496	1350000	2620000	961623	1860000	1440000	1880000	1530000	1650000	1580000	2250000	505617	1740000
cwlM	N-ACETYMURAMYL-L-ALANINE	N-ACETYMURAMYL-L-ALANINE		15100000	14400000	12300000	20700000	11400000	17700000	15200000	41200000	23200000	19200000	36800000	27700000	31400000
cyaB	putative	putative		43081,8					126752		102237	103627	104427	79864,2	31115,5	166639
cydC	ABC-type	ABC-type		88992,2	258144	257813		183891	251577	115408	64813,9		208174	126822	207207	106088
cynT	CARBONIC	CARBONIC		41300000	56900000	33500000	62500000	78000000	52700000	65100000	53000000	62100000	61000000	45500000	69800000	58600000
cysD	Sulfate	Sulfate		282486	449463	539631	220590	656335	1180000	526422	1270000	703354	1900000	2930000	1430000	2690000
cysE	Serine	Serine		1940000	1280000	852654	2020000	725172	912596	645645	1270000	817707	1660000	1660000	784114	1280000
cysH	Phosphoadenosine-Phosphosulfate	Phosphoadenosine-Phosphosulfate		0	0	0	161750	1710000	479147	1440000	913738	1230000	1100000	2960000	1560000	4020000
cysI	Sulfite	Sulfite		9370000	2450000	2560000	3530000	4420000	4670000	5100000	7520000	7580000	6150000	24800000	22900000	27300000
cysJ	Probable	Probable				358205			3440000		3190000	688475	2600000	12800000	3860000	3240000
cysK	O-Acetylserine	O-Acetylserine		220000000	220000000	198000000	251000000	230000000	203000000	265000000	183000000	204000000	187000000	237000000	226000000	222000000
cysN	Sulfate	Sulfate		3480000	1620000	1510000	1420000	2580000	2010000	980820	3210000	1920000	3090000	9830000	12900000	19400000
cysQ	3'-Phosphoadenosine	3'-Phosphoadenosine		20000000	27700000	25600000	25300000	23400000	22600000	21800000	17500000	20200000	20500000	16000000	16500000	31200000
cysS	CYSTEINE	CYSTEINE		9360000	8710000	12000000	6220000	9070000	7280000	9600000	10200000	11400000	13800000	12800000	5750000	12100000
cysS2	PUTATIVE	PUTATIVE		13400000	19000000	14100000	22300000	15100000	18900000	12500000	26100000	16900000	20600000	15700000	17500000	21500000
dac	D-ALANYL-D-ALANINE	D-ALANYL-D-ALANINE											3936,03	3745,14	4502,49
dacB	PENICILLIN-BINDING	PENICILLIN-BINDING		536691	1490000	2070000	1480000	1360000	1840000	1530000	1110000	1050000	1440000	1100000	1300000	1280000
dadA	PUTATIVE	PUTATIVE		2810000	4660000	6300000	2830000	4740000	2620000	4180000	3330000	2850000	2820000	3080000		4900000
dapA	DIHYDRODIPICOLINATE	DIHYDRODIPICOLINATE		39000000	53000000	33100000	76200000	42800000	39900000	36600000	48300000	30100000	39500000	38900000	46600000	48900000
dapB	DIHYDRODIPICOLINATE	DIHYDRODIPICOLINATE		4790000	3200000	2650000	4840000	2100000	2840000	4630000	4080000	2410000	2570000	4270000	1680000	4280000
dapD	TETRAHYDRODIPICOLINATE	TETRAHYDRODIPICOLINATE		4430000	5770000	5560000	8040000	5260000	5580000	4260000	7040000	4310000	7330000	9790000	8230000	5870000
dapD2	similar	similar		5470000	5670000	5560000	8850000	4030000	5300000	6710000	3990000	5570000	5730000	4240000	7880000	10700000
dapE	SUCCINYL-DIAMINOPIMELATE	SUCCINYL-DIAMINOPIMELATE		2030000	2690000	2560000	3560000	2740000	3150000	2710000	2940000	3070000	3130000	6830000	4010000	4590000
dapF	Diaminopimelate	Diaminopimelate		6740000	6860000	7870000	7380000	12100000	9410000	12900000	8890000	6060000	11300000	13200000	6170000	14600000
dcd	DEOXYCYTIDINE	DEOXYCYTIDINE		40200000	69000000	53400000	42200000	54300000	76000000	47200000	54500000	65800000	39200000	54900000	50800000	29500000
dcp	PROBABLE	PROBABLE		10200000	14000000	10700000	13900000	11800000	12300000	11600000	9200000	13200000	8380000	10800000	11400000	13000000
ddh	MESO-DIAMINOPIMELATE	MESO-DIAMINOPIMELATE		51300000	69500000	34200000	54000000	47400000	42800000	36500000	47200000	51300000	58700000	47200000	27800000	47900000
ddlA	D-ALANINE--D-ALANINE	D-ALANINE--D-ALANINE		1640000	1380000	1670000	8700000	1770000	1460000	1780000	2440000	4360000	1910000	4300000	3370000	3350000
def1	POLYPEPTIDE	POLYPEPTIDE		0	0	0		867775		374761			301192		565630
def2	POLYPEPTIDE	POLYPEPTIDE		0	0	0	4350000	4600000	13000000	3340000	9600000	4680000	9240000	6290000	3370000	4790000
deoC	DEOXYRIBOSE-PHOSPHATE	DEOXYRIBOSE-PHOSPHATE		1810000	2680000	2620000	3190000	2210000	2010000	1870000	1620000	1680000	2350000	1880000	5310000	2380000
devB	PUTATIVE	PUTATIVE		32800000	41600000	43400000	39500000	35000000	47200000	33100000	30400000	41300000	48900000	31400000	33700000	25400000
dfp	DNA/PANTOTHENATE	DNA/PANTOTHENATE		1580000	1160000	1770000	1870000	1280000	1360000	1770000	1710000	2090000	2330000	2110000	1270000	1610000
dgt	DEOXYGUANOSINETRIPHOSPHATE	DEOXYGUANOSINETRIPHOSPHATE		8100000	14400000	13800000	12600000	9530000	8470000	9830000	9620000	10300000	15200000	12400000	8830000	10800000
dinG	PROBABLE	PROBABLE		9790000	16500000	4210000	13400000	10300000		5870000				1260000	11700000	4690000
dkg	2,5-DIKETO-D-GLUCONIC	2,5-DIKETO-D-GLUCONIC		11300000	17600000	11600000	18200000	10700000	13300000	11600000	10300000	9230000	11900000	5610000	10400000	9400000
dkgA	2,5-DIKETO-D-GLUCONIC	2,5-DIKETO-D-GLUCONIC		5040000	3220000	1300000	5150000	5360000	5690000	4280000	3480000	4180000	4270000	2430000	3850000	2990000
dld	D-LACTATE	D-LACTATE		6210000	4890000	6100000	11300000	4470000	4970000	6160000	7920000	5460000	6940000	15900000	12100000	9830000
dnaA	CHROMOSOMAL	CHROMOSOMAL		2810000	1400000	2290000	2300000	5920000	5040000	4180000	1600000	3980000	2330000	1940000	1450000	1320000
dnaB	PUTATIVE	PUTATIVE		3650000	2540000	1790000	2640000	2200000	2080000	3260000	1950000	2430000	2410000	2110000	3640000	2810000
dnaE1	PUTATIVE	PUTATIVE		707916	407976		722652	387664	527151	608866	456767	286894	1160000	496471	888697	1960000
dnaG	DNA	DNA		1190000	1690000	4220000	893131	1930000	1750000	1530000	2170000	1580000	1850000	1610000	1260000	2330000
dnaJ	CHAPERONE	CHAPERONE		21000000	40100000	37900000	34100000	28100000	32700000	33600000	36700000	40900000	43400000	51600000	44700000	31000000
dnaJ2	Molecular	Molecular		14700000	25800000	25300000	22900000	25200000	37000000	22000000	38300000	53300000	38900000	50300000	37900000	18000000
dnaK	Heat	Heat		586000000	619000000	699000000	732000000	608000000	624000000	695000000	487000000	533000000	500000000	690000000	789000000	540000000
dnaN	DNA	DNA		8890000	15400000	14900000	11900000	20100000	18500000	13700000	12600000	12100000	22200000	20600000	20100000	29700000
dnaX	PUTATIVE	PUTATIVE				134788	73115,4	182446	168297	272647	47172,4	84760,5		200613	101029	197926
dnaZX	DNA	DNA		1210000	470541	439897	615743	1350000	288516	911916	908666	1210000	810955	2500000	674441	562861
dps	STARVATION-INDUCED	STARVATION-INDUCED		75900000	83100000	96000000	79600000	73600000	78200000	76900000	107000000	101000000	79100000	54400000	40800000	43800000
dtsR1	ACETYL/PROPIONYL-COA	ACETYL/PROPIONYL-COA		36200000	32100000	41600000	19400000	27500000	19800000	25600000	30600000	32200000	76500000	63800000	77900000	97300000
dtsR2	ACETYL/PROPIONYL	ACETYL/PROPIONYL		42600000	35100000	34500000	39600000	42900000	39000000	43200000	38900000	44500000	45200000	59700000	45100000	72400000
dtxR	IRON	IRON		53800000	36800000	36800000	19900000	44300000	38200000	33500000	23800000	40900000	36300000	23600000	32200000	28400000
dut	PROBABLE	PROBABLE		1240000	1610000	1500000	1970000	1270000	1630000	1350000	1480000	1460000	1880000	1530000	1190000	1140000
dxr	PROBABLE	PROBABLE		5000000	13300000	11500000	10400000	9380000	6370000	9080000	4040000	17800000	3050000	3190000	5450000	13800000
dxs	PROBABLE	PROBABLE		3730000	2660000	2800000	3110000	3100000	3100000	2360000	2590000	2130000	2440000	3740000	4110000	6530000
efp	Translation	Translation		97300000	164000000	94500000	147000000	116000000	136000000	107000000	147000000	164000000	188000000	90900000	114000000	78800000
embC	Probable	Probable		3200000	4380000	5560000	3630000	6570000	6230000	3500000	4150000	4730000	8810000	5690000	5570000	9060000
eno	ENOLASE	ENOLASE		757000000	903000000	840000000	1200000000	840000000	905000000	1060000000	931000000	820000000	717000000	797000000	1130000000	667000000
entC	ISOCHORISMATE	ISOCHORISMATE		2330000	1820000	2050000	3000000	1790000	1870000	1750000	2090000	1610000	2550000	3030000	4080000	4490000
fabG2	PROBABLE	PROBABLE		126536	137842	67343,3	55054,2		48521	38074,2	76371,5	81768,8			73883
fadD15	LONG-CHAIN	LONG-CHAIN		5340000	4040000	8410000	5220000	5140000	7280000	5390000	6670000	6330000	7800000	5830000	3880000	7620000
fadD2	PUTATIVE	PUTATIVE		40200000	52400000	37300000	67800000	34700000	49400000	34400000	37900000	41300000	31100000	30700000	43900000	25800000
fadD4	ACYL-COA	ACYL-COA		1380000	2400000	410814	1050000	3240000	2270000	2630000	660867	777027	1610000	904178	1230000	2420000
fadD5	LONG-CHAIN-FATTY-ACID-COA	LONG-CHAIN-FATTY-ACID-COA		22500000	24000000	33000000	23500000	30600000	21200000	29000000	21500000	16600000	24900000	26100000	18100000	27200000
fas-IA	FATTY	FATTY		7060000	7000000	9530000	9770000	7630000	6760000	5080000	6470000	9420000	11400000	19800000	17200000	24800000
fas-IB	FATTY	FATTY		22600000	19400000	22000000	19100000	26600000	21200000	17500000	25900000	24500000	31300000	71500000	48500000	81400000
fda	fructose-bisphosphate	fructose-bisphosphate		98700000	100000000	86900000	126000000	93900000	82900000	70100000	91300000	99800000	95500000	126000000	90800000	145000000
fdhF	PUTATIVE	PUTATIVE		5970000	7090000	4930000	6890000	5760000	4020000	4420000	3290000	4240000	4480000	3470000	5280000	6480000
fdxB	FERREDOXIN	FERREDOXIN		342954	277770	241126	468255	960256	903084	507362	216741	345029	434722	118482	244945	303675
fdxC	FERREDOXIN	FERREDOXIN		175000000	114000000	155000000	70500000	227000000	129000000	124000000	139000000	146000000	170000000	99800000	58200000	112000000
fixA	PUTATIVE	PUTATIVE		30700000	36700000	25900000	25800000	33700000	23800000	32900000	34400000	32500000	29000000	37000000	40300000	30800000
fixB	PUTATIVE	PUTATIVE		9960000	9690000	7930000	8740000	11600000	7010000	14600000	6600000	5720000	12200000	24700000	9630000	25500000
fkpA	PROBABLE	PROBABLE		77200000	86500000	140000000	69100000	110000000	130000000	77300000	119000000	117000000	119000000	120000000	61100000	71500000
fmt	METHIONYL-TRNA	METHIONYL-TRNA		9530000	8580000	9630000	8930000	9180000	11200000	9310000	10800000	17500000	16100000	9330000	6340000	6800000
fmu	PUTATIVE	PUTATIVE		4540000	7960000	6480000	7870000	6180000	5210000	5200000	6700000	7290000	6290000	4380000	6070000	6040000
folA	DIHYDROFOLATE	DIHYDROFOLATE		3090000	9620000	4080000	4420000	3510000	6010000	6690000	3360000	4340000	3070000	5200000	5500000	2590000
folC	FOLYLPOLYGLUTAMATE	FOLYLPOLYGLUTAMATE		20600000	12400000	12800000	12500000	15100000	17200000	12900000	20400000	14400000	19800000	22900000	16100000	12600000
folD	METHYLENETETRAHYDROFOLATE	METHYLENETETRAHYDROFOLATE		46700000	40500000	45400000	41400000	49100000	48100000	37500000	49000000	50900000	67100000	76500000	67500000	96100000
folE	GTP	GTP		255420	520082	253311	587633	494646	288591	529079	653807	830793	849119	596815	447411	497129
folK	7,	7,		0	0	0	0	0	0	0	0	0	0	1700000	845930	964122
folP1	DIHYDROPTEROATE	DIHYDROPTEROATE		1810000	1980000	2850000	2890000	2610000	3120000	2190000	2260000	1690000	2950000	2640000	1690000	2170000
folP2	DIHYDROPTEROATE	DIHYDROPTEROATE						239692	276678	441064
folX	DIHYDRONEOPTERIN	DIHYDRONEOPTERIN		0	0	0	0	0	0	0	1790000	2950000	1510000	0	0	0
fprA	PUTATIVE	PUTATIVE		47700000	42000000	56300000	45300000	49000000	47500000	48300000	49800000	52200000	43300000	58000000	60300000	44200000
frr	RIBOSOME	RIBOSOME		330000000	422000000	502000000	407000000	562000000	416000000	533000000	561000000	430000000	425000000	358000000	308000000	342000000
ftn	Ferritin-like	Ferritin-like		101000000	171000000	118000000	73500000	119000000	133000000	79800000	52100000	71400000	37600000	38100000	21300000	26400000
ftsE	CELL	CELL		2750000	7050000	5990000	7170000	3000000	4500000	6620000	4740000	3490000	6420000	5950000	6110000	3090000
ftsH	CELL-DIVISION	CELL-DIVISION		28600000	35700000	33900000	29400000	25900000	27900000	30400000	28000000	29700000	17500000	33400000	33000000	20300000
ftsI	PENICILLIN-BINDING	PENICILLIN-BINDING		3270000	3640000	4200000	6120000	1840000	3420000	2110000	1750000	1690000	2220000	1200000	2750000	3180000
ftsK	CELL	CELL		1570000	1100000	1780000	1540000	876303	966711	1060000	626406	438716	907685	1010000	1260000	1770000
ftsQ	Cell	Cell		2280000	6530000	10300000	3610000	4250000	5140000	2590000	4430000	5870000	3080000	2990000	2670000	2990000
ftsY	Signal	Signal		5890000	9520000	7650000	6630000	5940000	4900000	7640000	9370000	6740000	5650000	6170000	8230000	6200000
ftsZ	Cell	Cell		65100000	55600000	70700000	64000000	53400000	60300000	64200000	44100000	44800000	63700000	40600000	52700000	66400000
fum	FUMARATE	FUMARATE		49800000	51000000	51700000	72500000	48600000	35000000	38000000	44000000	39100000	40900000	55100000	51900000	45200000
fusA	ELONGATION	ELONGATION		116000000	101000000	114000000	147000000	115000000	130000000	119000000	147000000	146000000	148000000	274000000	165000000	244000000
gabD1	PROBABLE	PROBABLE		395638	210445	218107	447789	359940	124628	199522					227400	372196
gabD2	PUTATIVE	PUTATIVE		14100000	13200000	14600000	15000000	12300000	9230000	16300000	10000000	12900000	10900000	7300000	17000000	19700000
gabD3	SUCCINATE-SEMIALDEHYDE	SUCCINATE-SEMIALDEHYDE		1830000	2140000	1680000	1370000	2350000	1650000	2130000	1640000	1470000	1190000	2750000	1510000	2160000
gabT	PROBABLE	PROBABLE		2610000	751256	609197	1260000	1670000	1900000	2300000	1330000	2810000	1370000	2970000	3780000	1480000
galE	UDP-GLUCOSE	UDP-GLUCOSE		2300000	3490000	3230000	3130000	1610000	2830000	1820000	2310000	2860000	2470000	1500000	1900000	1760000
galU1	UTP-GLUCOSE-1-PHOSPHATE	UTP-GLUCOSE-1-PHOSPHATE		30400000	30400000	32700000	29500000	31500000	35000000	27200000	39800000	31400000	36700000	27000000	28200000	36700000
galU2	PUTATIVE	PUTATIVE		35200000	45600000	43900000	37500000	35300000	58500000	41100000	37500000	66200000	31700000	66000000	43200000	34200000
gap	GLYCERALDEHYDE-3-PHOSPHATE	GLYCERALDEHYDE-3-PHOSPHATE		577000000	780000000	626000000	972000000	652000000	620000000	657000000	474000000	555000000	521000000	691000000	695000000	658000000
gapX	similar	similar		17200000	8530000	9280000	14000000	7870000	9060000	7830000	7400000	8120000	10000000	12200000	9920000	12900000
gatA	PROBABLE	PROBABLE		43400000	24700000	39600000	19800000	29700000	24800000	25400000	35700000	29800000	31500000	39900000	24500000	44600000
gatB	PROBABLE	PROBABLE		25400000	23400000	17300000	26500000	26100000	27400000	27700000	29300000	23200000	23200000	31800000	28800000	24900000
gatC	GLUTAMYL-TRNA(GLN)	GLUTAMYL-TRNA(GLN)		30100000	28000000	61900000	85400000	57500000	43700000	43500000	40000000	21200000	181000000	62500000	230000000	67500000
gcp	PROBABLE	PROBABLE		2600000	1930000	2970000	2600000	2560000	1810000	2620000	1790000	2560000	2290000	4060000	3900000	3670000
gdh	NADP-SPECIFIC	NADP-SPECIFIC		15100000	16100000	19100000	21000000	10700000	10500000	13600000	10500000	12200000	16200000	14400000	22900000	16700000
ggtB	PROBABLE	PROBABLE		15700000	22100000	18000000	18700000	19400000	15000000	25400000	10100000	10900000	12400000	12300000	16900000	8470000
gidB	GLUCOSE-INHIBITED	GLUCOSE-INHIBITED		4490000	2720000	4290000	4190000	4710000	4990000	7290000	5400000	5270000	5160000	5790000	6880000	5810000
glbO	Hemoglobin-like	Hemoglobin-like		23300000	31100000	41600000	20900000	23000000	22700000	12200000	37400000	26400000	30200000	13200000	8790000	10900000
glcD	PROBABLE	PROBABLE			35020,9		42727,4			19513,2			15472,3	57335,6		22926,3
glf	UDP-GALACTOPYRANOSE	UDP-GALACTOPYRANOSE		14500000	8060000	6360000	10700000	11100000	13600000	6030000	11600000	7740000	9600000	16300000	10400000	7920000
glgA	GLYCOSYL	GLYCOSYL		6070000	7280000	8220000	9070000	9430000	8090000	5740000	7160000	6450000	12200000	7310000	9130000	11900000
glgB	1,4-ALPHA-GLUCAN	1,4-ALPHA-GLUCAN		4850000	4090000	6910000	4860000	3050000	3820000	2700000	2290000	2490000	4840000	3080000	5360000	8640000
glgC	ADP-GLUCOSE	ADP-GLUCOSE		13700000	15100000	15700000	12300000	13000000	11400000	11500000	9980000	12000000	10500000	12300000	13300000	18700000
glgE	PUTATIVE	PUTATIVE		19000000	17600000	11000000	18100000	9000000	13500000	10800000	11600000	15700000	10400000	11600000	12300000	10900000
glgP1	PUTATIVE	PUTATIVE		23600000	27000000	23400000	26500000	29700000	24700000	29200000	26300000	31900000	33400000	44700000	48800000	57900000
glgX	GLYCOGEN	GLYCOGEN		2400000	1900000	2200000	2970000	6060000	3390000	4560000	3900000	9170000	4860000	4780000	4440000	8260000
glk	GLUCOKINASE,	GLUCOKINASE,		2580000	2550000	3330000	2760000	3090000	2680000	2800000	3000000	4930000	3560000	5120000	821452	3300000
glmS	PROBABLE	PROBABLE		21200000	11600000	18400000	14800000	15600000	15900000	18400000	13800000	12500000	24400000	34500000	42100000	33700000
glmU	PUTATIVE	PUTATIVE		8120000	9920000	7590000	8920000	4620000	6710000	9040000	7400000	9010000	6250000	8860000	5140000	9190000
glnA	GLUTAMINE	GLUTAMINE		104000000	93900000	90300000	95900000	91100000	104000000	63100000	91500000	111000000	135000000	120000000	80800000	117000000
glnA2	GLUTAMINE	GLUTAMINE		1210000	1920000	1060000	2960000	955507	834179	963370	1470000	1840000	825891	1240000	1060000	1330000
glnE	GLUTAMATE-AMMONIA-LIGASE	GLUTAMATE-AMMONIA-LIGASE		0	0	0	0	0	0	0	0	0	0	297837	272501	1930000
glnK	Nitrogen	Nitrogen		12900000	28400000	12900000	27700000	14800000	29000000	18600000	21600000	23400000	28200000	14500000	15100000	18700000
glpD	GLYCEROL-3-PHOSPHATE	GLYCEROL-3-PHOSPHATE		6150000	3190000	4510000	4150000	2930000	2360000	3630000	4330000	3740000	5200000	7390000	3440000	3480000
glpK	GLYCEROL	GLYCEROL		7220000	5900000	3170000	5500000	6680000	4090000	5390000	5630000	4780000	3340000	7110000	5330000	5710000
glpQ1	PUTATIVE	PUTATIVE		852578	1330000		860889	1350000	725700	694100	572637	834007	635066	747522	235533	321142
glpQ2	PUTATIVE	PUTATIVE		1560000	1150000	979468	1910000	1120000	1320000	703036	1620000	1190000	1460000	1430000	1910000	1770000
glpX	GLPX-LIKE	GLPX-LIKE		37600000	30000000	31700000	36700000	37500000	40000000	33200000	38000000	36600000	35300000	31400000	19800000	39900000
glsK	PUTATIVE	PUTATIVE					36718,1	24988,5			21927,7	31058,4			29922	145880
gltA	CITRATE	CITRATE		23700000	23700000	24400000	24900000	24400000	21400000	20600000	16800000	22400000	21400000	19400000	20700000	21100000
gltB	GLUTAMINE	GLUTAMINE			13281	17724,4	2220000	1160000	667851	1300000		1290000	853432	680374	746940	1080000
gltD	GLUTAMINE	GLUTAMINE											19461,2		24777,4	17275,9
gltS	PUTATIVE	PUTATIVE		42300000	41600000	35800000	51200000	32300000	40400000	45300000	40500000	45400000	29200000	59300000	57200000	51800000
gltX	GLUTAMYL-TRNA	GLUTAMYL-TRNA		1090000	626079	1300000	1000000	621775	325356	600479	518617	398756	1500000	845136	947290	2100000
gluB	GLUTAMATE	GLUTAMATE		1040000000	1090000000	1160000000	734000000	1030000000	680000000	1090000000	498000000	766000000	851000000	368000000	499000000	487000000
glxK	PUTATIVE	PUTATIVE		5570000	4490000	10400000	8870000	5960000	7830000	5560000	6420000	4940000	6990000	4300000	4010000	5740000
glyA	Serine	Serine		23000000	15900000	18200000	22000000	22400000	19300000	18500000	22600000	22100000	21000000	31800000	24200000	26000000
glyS	GLYCYL-TRNA	GLYCYL-TRNA		23900000	29700000	28400000	36800000	35300000	39000000	37800000	33800000	34900000	30200000	43200000	42100000	66500000
gmk	PROBABLE	PROBABLE		68500000	132000000	160000000	223000000	105000000	109000000	101000000	149000000	102000000	212000000	85000000	91000000	105000000
gnd	6-PHOSPHOGLUCONATE	6-PHOSPHOGLUCONATE		12300000	18100000	17500000	39600000	13000000	20300000	15200000	18400000	17100000	17400000	26500000	16900000	13400000
gntK	PUTATIVE	PUTATIVE		382162	276792	428040	235563	136680		324270	175178	311039	635046	437681	220909	434460
gor	PUTATIVE	PUTATIVE		5250000	3920000	4350000	5560000	2440000	3640000	2660000	3140000	3030000	4540000	5200000	4670000	5690000
gpmA	PHOSPHOGLYCEROMUTASE	PHOSPHOGLYCEROMUTASE		174000000	200000000	183000000	299000000	195000000	157000000	198000000	180000000	196000000	227000000	144000000	162000000	170000000
gpsA	GLYCEROL-3-PHOSPHATE	GLYCEROL-3-PHOSPHATE		5570000	10400000	5170000	5770000	5830000	5220000	5530000	2000000	2690000	4300000	2730000	7280000	10400000
gpsI	PUTATIVE	PUTATIVE		23000000	33300000	30000000	33600000	36600000	28400000	28800000	23700000	32600000	27500000	57400000	46500000	66100000
gpt	PURINE	PURINE		2580000	3550000	3070000	2060000	6020000	3870000	1860000	1450000	2170000	3130000	2170000	5510000	1900000
gpx	GLUTATHIONE	GLUTATHIONE		5500000	7930000	6660000	4870000	5710000	5000000	5540000	5270000	7900000	10200000	3740000	7560000	6610000
greA	Transcription	Transcription		14700000	14500000	18300000	17600000	23300000	18200000	18500000	30000000	19100000	25700000	24400000	13700000	9130000
groEL	Chaperonin	Chaperonin		206000000	281000000	233000000	241000000	185000000	265000000	228000000	233000000	256000000	223000000	361000000	374000000	201000000
groEL'	60	60		797206	535322	347655	1240000	800774	1710000	1030000	1860000	3730000	2720000	3910000	4850000	3360000
groES	Chaperonin	Chaperonin		1180000000	1470000000	2510000000	981000000	1970000000	1700000000	1360000000	1510000000	1210000000	1860000000	1400000000	1530000000	1470000000
grpE	Molecular	Molecular		120000000	143000000	180000000	108000000	142000000	117000000	147000000	214000000	180000000	186000000	117000000	137000000	148000000
guaA	PUTATIVE	PUTATIVE		7450000	10200000	7070000	8900000	7370000	7680000	9080000	9830000	6670000	11300000	14400000	18200000	14500000
guaB1	INOSITOL-MONOPHOSPHATE	INOSITOL-MONOPHOSPHATE		5650000	7350000	4360000	7790000	4690000	4960000	3910000	4510000	5410000	6740000	6430000	8420000	4350000
guaB2	INOSITOL-MONOPHOSPHATE	INOSITOL-MONOPHOSPHATE		24400000	32100000	20000000	32100000	39400000	25700000	36100000	25900000	26500000	34300000	38100000	49500000	63700000
guaB3	IMP	IMP		17800000	16200000	15700000	17200000	22100000	19100000	17700000	20400000	25700000	29800000	21900000	17500000	27700000
gyrA	DNA	DNA		7660000	4410000	4420000	7060000	5110000	6210000	5400000	5220000	6550000	8030000	12000000	11800000	15100000
gyrB	DNA	DNA		33500000	44100000	27400000	41800000	28600000	35700000	32000000	40800000	47100000	35200000	34700000	46500000	48900000
hde	PROBABLE	PROBABLE						941288	1290000	1620000				852286
hemA	GLUTAMYL-TRNA	GLUTAMYL-TRNA		2820000	3760000	2570000	3450000	2870000	5630000	3950000	3460000	3240000	3370000	1970000	5550000	3330000
hemB	DELTA-AMINOLEVULINIC	DELTA-AMINOLEVULINIC		9350000	9330000	9090000	15600000	11200000	13300000	13800000	13600000	19100000	9010000	18900000	24700000	13700000
hemC	PORPHOBILINOGEN	PORPHOBILINOGEN		20800000	13100000	12000000	15900000	20300000	32300000	19100000	22400000	28700000	26100000	28500000	21800000	29200000
hemD	UROPORPHYRINOGEN	UROPORPHYRINOGEN		12600000	7710000	9420000	6650000	8720000	5860000	8210000	5740000	5060000	6010000	5000000	6550000	11000000
hemE	UROPORPHYRINOGEN	UROPORPHYRINOGEN		12800000	15100000	10100000	11200000	14300000	14500000	18600000	15700000	19300000	8120000	12400000	17500000	14800000
hemH	FERROCHELATASE	FERROCHELATASE		0	0	0	2040000	1650000	2670000	1610000	2670000	2510000	3060000	3140000	2400000	3770000
hemL	GLUTAMATE-1-SEMIALDEHYDE	GLUTAMATE-1-SEMIALDEHYDE		9080000	6920000	8830000	7100000	5540000	6240000	4850000	5250000	5620000	9310000	9620000	14200000	10500000
hemN	PUTATIVE	PUTATIVE		352156	218959	178794	241304	484586	134668	263171	121827	266417	360166	303548	621979	390089
hemY	PUTATIVE	PUTATIVE		5980000	5150000	4510000	17400000	12400000	6260000	8040000	11300000	14000000	10400000	11500000	3200000	6190000
hipO	PUTATIVE	PUTATIVE		2220000	1390000	2130000	3380000	1510000		1020000	4890000		1560000	2080000	5030000	5140000
hisA	PHOSPHORIBOSYLFORMIMINO-5-AMINOIMIDAZOLE	PHOSPHORIBOSYLFORMIMINO-5-AMINOIMIDAZOLE		5120000	8110000	12700000	7400000	12300000	9360000	13100000	6850000	9610000	9260000	7690000	12100000	17900000
hisB	IMIDAZOLEGLYCEROL-PHOSPHATE	IMIDAZOLEGLYCEROL-PHOSPHATE		682438		694497	4750000	831795	1930000	1350000	1480000		1220000	1970000	1040000	1730000
hisC	PROBABLE	PROBABLE		10600000	9060000	11500000	9210000	13600000	18000000	11700000	6090000	5560000	7150000	9510000	7780000	17700000
hisD	HISTIDINOL	HISTIDINOL		12100000	27300000	46900000	17100000	18700000	28100000	18900000	17400000	33400000	54600000	21600000	21300000	35200000
hisE	PHOSPHORIBOSYL-ATP	PHOSPHORIBOSYL-ATP		13200000	20900000	11500000	13500000	7980000	12600000	15500000	17700000	27400000	28400000	23900000	17100000	2530000
hisF	PROBABLE	PROBABLE		5190000	5380000	5670000	6700000	5640000	6640000	5420000	6790000	5290000	6150000	8640000	6190000	8180000
hisG	ATP	ATP		53800000	57100000	66800000	57900000	60300000	60100000	78200000	60300000	83800000	38400000	55600000	60200000	52200000
hisH	IMIDAZOLEGLYCEROL-PHOSPHATE	IMIDAZOLEGLYCEROL-PHOSPHATE		3660000	2670000	4470000	4110000	4420000	6530000	3420000	4570000	4000000	4460000	5160000	6180000	10300000
hisI	PROBABLE	PROBABLE		1380000	2880000	2090000	2200000	2770000	6070000	2910000	2810000	3440000	5950000	2220000	2890000	2950000
hisS	HISTIDYL-TRNA	HISTIDYL-TRNA		16700000	13800000	16600000	13100000	14400000	14400000	16200000	17300000	13900000	16000000	20100000	20500000	25000000
hmp	FLAVOHEMOPROTEIN	FLAVOHEMOPROTEIN		1290000	2580000	763921	1200000	1320000	1940000	1120000	1480000	1580000	1430000	795277	1120000	1160000
hmuO	PROBABLE	PROBABLE		1490000	7230000	1240000	1330000	1280000	1720000	1280000	1140000	1290000	2480000	1580000	2220000	4370000
hom	Homoserine	Homoserine		5570000	4740000	6390000	7860000	6140000	7330000	6960000	13100000	11600000	10700000	11900000	8080000	7410000
hpaG	PUTATIVE	PUTATIVE		4900000	5910000	4510000	3780000	7070000	4500000	6050000	7110000	9780000	2050000	5280000	4270000	2700000
hpt	HYPOXANTHINE	HYPOXANTHINE		7450000	8360000	7540000	22300000	112000000	43800000	56800000	28800000	33900000	43000000	29500000	18300000	16500000
hrcA	Transcriptional	Transcriptional		901056	1090000	507350	260812	348981	256556	318114	339468	548441	85714,7	285020	282502	187854
hrpA	PROBABLE	PROBABLE		630480	397727	987432	647515	861234	646125	455915	378924	648806	739213	1080000	622090	1560000
hrpB	PROBABLE	PROBABLE		75370,8	391236	552863	224425			33116,1	94893,7	48373,3	529308	53688,4	843662	190434
hscA	Molecular	Molecular		9890000	2750000	4730000	4950000	6020000	4810000	3740000	2380000	2640000	2640000	3410000	8890000	3520000
hspR	TRANSCRIPTIONAL	TRANSCRIPTIONAL		806757	911982	471243	476009	657848	452358	587295	921395	702653	568161	642571	880417	1030000
icd	ISOCITRATE	ISOCITRATE		115000000	113000000	114000000	121000000	158000000	163000000	160000000	152000000	150000000	143000000	189000000	162000000	194000000
idhA1	MYO-INOSITOL	MYO-INOSITOL		1450000	742864	417208	736591	1010000	1080000	1120000	478824	1170000	967522	671832	1010000	465866
idhA2	MYO-INOSITOL	MYO-INOSITOL		1690000	2170000	1310000	1950000	1820000	5890000	1830000	900112	7640000	4670000	1360000	1770000	1960000
idhA3	MYO-INOSITOL	MYO-INOSITOL			3230000					2690000	1670000	2000000	580486		1790000	2520000
idi	ISOPENTENYLDIPHOSPHATE	ISOPENTENYLDIPHOSPHATE		0	0	0	1200000	10400000	1890000	6350000	13800000	3280000	14700000	0	0	0
idsA	PUTATIVE	PUTATIVE		7990000	8130000	9670000	8000000	14500000	12300000	19100000	9000000	9620000	6860000	7320000	14300000	8530000
ihf	putative	putative		1040000000	1820000000	1150000000	1930000000	1260000000	1630000000	2320000000	1770000000	1850000000	2050000000	1840000000	1720000000	1560000000
ileS	ISOLEUCINE-TRNA	ISOLEUCINE-TRNA		4160000	8290000	2540000	4940000	5830000	3420000	6150000	10300000	9460000	8120000	15100000	7280000	11600000
ilvA	THREONINE	THREONINE		2020000	2850000	2750000	2790000	3970000	4960000	1770000	2120000	2520000	3130000	7030000	6960000	7150000
ilvB	ACETOLACTATE	ACETOLACTATE		7510000	5260000	5760000	6870000	8050000	6780000	8750000	7890000	11700000	6950000	13400000	12700000	14700000
ilvC	KETOL-ACID	KETOL-ACID		20100000	17200000	20700000	19900000	16300000	23600000	17600000	16300000	16000000	15600000	19600000	14200000	27800000
ilvD	DIHYDROXY-ACID	DIHYDROXY-ACID		9020000	9000000	7980000	12200000	9640000	8170000	9160000	11100000	11600000	9480000	22400000	12600000	21700000
ilvE	BRANCHED-CHAIN	BRANCHED-CHAIN		23100000	21000000	18600000	24900000	18100000	18100000	24100000	15800000	17100000	31800000	18800000	41000000	31500000
ilvN	ACETOHYDROXYACID	ACETOHYDROXYACID		21800000	23700000	18900000	19400000	21000000	12900000	25500000	17300000	23700000	16400000	18000000	21400000	11400000
impA	MYO-INOSITOL-1(OR	MYO-INOSITOL-1(OR		6510000	4600000		10300000	5490000	3380000	4300000	9190000	7950000		1910000	4640000	2870000
infA	TRANSLATION	TRANSLATION		198000000	203000000	352000000	157000000	295000000	517000000	128000000	315000000	295000000	474000000	191000000	101000000	122000000
infB	Translation	Translation		22800000	31800000	24100000	37100000	25500000	29100000	18500000	26000000	21200000	33400000	31500000	26400000	21700000
infC	TRANSLATION	TRANSLATION		21600000	32300000	23800000	31200000	20900000	23900000	28900000	26200000	28200000	19700000	29300000	23300000	23300000
iolB	enzyme	enzyme		18400000	26500000	26100000	28100000	13500000	26200000	18600000	15100000	15100000	9520000	15400000	39300000	21100000
iolC	sugar	sugar		4450000	4260000	2100000	1620000	3230000	1230000	1710000	2740000	3420000	4890000	1790000	2490000	4030000
iolD	PUTATIVE	PUTATIVE		1620000	1230000	1070000	1300000	1430000	1310000	1790000	841576	1030000	867410	1100000	752844	821433
iolE	phosphate	phosphate		43900000	59300000	28500000	41700000	68500000	39200000	60900000	26900000	42700000	39700000	31700000	33500000	50000000
iolG	PUTATIVE	PUTATIVE		10400000	17200000	11800000	14200000	8980000	8900000	11300000	9230000	8690000	11200000	8340000	7220000	8660000
iolH	MYO-INOSITOL	MYO-INOSITOL		24100000	33500000	18600000	17200000	20700000	14700000	25500000	15400000	20300000	15300000	11900000	15800000	10300000
ispB	PUTATIVE	PUTATIVE			2800000	1070000	2080000	1800000	1620000	1680000	1500000	2560000	2320000	1850000	1520000	1990000
ispD	2-C-METHYL-D-ERYTHRITOL	2-C-METHYL-D-ERYTHRITOL		3190000	5020000	3750000	2270000	3010000	2180000	2870000	2530000	2810000	1060000	1600000	2050000	4810000
ispF	2-C-METHYL-D-ERYTHRITOL	2-C-METHYL-D-ERYTHRITOL		280373		231975	242195	395877		365191	565661	373446	789838	690715	520117	962822
ispG	involved	involved		2600000	2830000	3100000	5580000	5050000	4290000	5830000	4210000	4220000	6520000	5980000	3250000	6180000
iunH2	PUTATIVE	PUTATIVE		1630000	2460000	4510000	2200000	4200000	4800000	2940000	2640000	6030000	2260000	1920000	2230000	3600000
katA	CATALASE	CATALASE		157000000	210000000	231000000	231000000	190000000	194000000	188000000	156000000	161000000	169000000	133000000	131000000	157000000
ksgA	PUTATIVE	PUTATIVE		8820000	11600000	10600000	10100000	9940000	9940000	11400000	10800000	10900000	9310000	11200000	10000000	9210000
ldh	L-LACTATE	L-LACTATE		60200000	70500000	37100000	37300000	39700000	35600000	46300000	42700000	35100000	31400000	55600000	39600000	53200000
lepA	Membrane	Membrane		12200000	7080000	9880000	7090000	10400000	11600000	11500000	11100000	12200000	10500000	26400000	17600000	22000000
lepB	PROBABLE	PROBABLE		8570000	9220000	11200000	5640000	9560000	7370000	8220000	9440000	9660000	14800000	5390000	10400000	8020000
leuA	2-ISOPROPYLMALATE	2-ISOPROPYLMALATE		16600000	18200000	31100000	14000000	9370000	12600000	8120000	22000000	12300000	12700000	23800000	14200000	21600000
leuB	3-ISOPROPYLMALATE	3-ISOPROPYLMALATE		4390000	7990000	5430000	4480000	5540000	4390000	8650000	4560000	5320000	4060000	3660000	4930000	3160000
leuC	3-ISOPROPYLMALATE	3-ISOPROPYLMALATE		3090000	5880000	4320000	4310000	4010000	3380000	3420000	2830000	3930000	4680000	4520000	3140000	4300000
leuD	3-ISOPROPYLMALATE	3-ISOPROPYLMALATE		11200000	20200000	16100000	20200000	12900000	14000000	10800000	8150000	10300000	14400000	11600000	23800000	9210000
leuS	LEUCYL-TRNA	LEUCYL-TRNA		3220000	2440000	4030000	3420000	2160000	2110000	2810000	3550000	3980000	3040000	5740000	4930000	7260000
lexA	PUTATIVE	PUTATIVE		33600000	62000000	76400000	109000000	58400000	55500000	65400000	55800000	58400000	36300000	80200000	63200000	39500000
lgt	PUTATIVE	PUTATIVE		1370000	2110000	2210000	1620000	1850000	1880000	1980000	1930000	1250000	2720000	3610000	1520000	4670000
ligA	DNA	DNA		7070000	10400000	6810000	8570000	8030000	7690000	9720000	8610000	9440000	7570000	9130000	11300000	8880000
lipA	LIPOIC	LIPOIC		4390000	5970000	9310000	7990000	11500000	11000000	9760000	14600000	8800000	10800000	16200000	9800000	9430000
lipB	LIPOATE-PROTEIN	LIPOATE-PROTEIN		4390000	5510000	2390000	2440000	5260000	5130000	5250000	3470000	4480000	2050000	2410000	1650000	1460000
lldA	PUTATIVE	PUTATIVE		107000000	81700000	70100000	108000000	89500000	92300000	114000000	59300000	82100000	57300000	49000000	68000000	50600000
lpd	DIHYDROLIPOAMIDE	DIHYDROLIPOAMIDE		28600000	26000000	40800000	33500000	36800000	26900000	22100000	28300000	34500000	37700000	35000000	37600000	44800000
lpdA	DIHYDROLIPOAMIDE	DIHYDROLIPOAMIDE		8080000	5090000	9960000	17800000	6370000	9110000	8940000	7550000	11700000	5570000	22600000	24600000	36200000
lplA	LIPOATE-PROTEIN	LIPOATE-PROTEIN		1500000	1930000	1980000	1410000	4250000	1410000	4190000	1360000	2440000	664171	1110000	601659	1220000
lppL	SECRETED	SECRETED		7520000	16500000	16100000	22100000	17900000	29400000	13400000	17700000	16100000	29700000	10200000	17000000	12600000
lppS	secreted	secreted		5000000	4080000	8760000	4240000	6180000	3510000	4880000	4700000	6040000	4070000	4870000	3480000	2970000
ltsA	glutamine-dependent	glutamine-dependent		12300000	10800000	14400000	10100000	8710000	8060000	7840000	10800000	10700000	10400000	12700000	9690000	19500000
lysA	DIAMINOPIMELATE	DIAMINOPIMELATE		5260000	6380000	18700000	10600000	6670000	4330000	6390000	8840000	9570000	13600000	21900000	9570000	12900000
lysC	ASPARTOKINASE	ASPARTOKINASE		9680000	6670000	10200000	8580000	12300000	8040000	11100000	12400000	10900000	13800000	13300000	11600000	14700000
lysG	TRANSCRIPTIONAL	TRANSCRIPTIONAL		465745			384054	1780000	762576	1960000	1110000	582967	303078	1180000	373667	954055
lysS	LYSYL-TRNA	LYSYL-TRNA		37500000	29200000	21500000	19000000	29100000	28800000	31400000	26400000	26200000	21100000	35400000	43000000	61300000
lytB	Penicillin	Penicillin		8360000	10800000	8310000	8410000	14900000	7700000	10000000	11600000	14000000	7990000	28000000	12000000	13900000
maa	MALTOSE	MALTOSE		2530000	1210000	3860000	3820000	1650000	2740000	1590000	1400000	2700000	3150000	3090000	1930000	1880000
mag	PUTATIVE	PUTATIVE		1890000	2980000	2080000	2250000	1190000	2670000	2490000	554522	1410000	1500000	768056	1120000	1100000
malQ	4-ALPHA-GLUCANOTRANSFERASE	4-ALPHA-GLUCANOTRANSFERASE		10700000	10700000	14600000	11500000	11900000	11300000	10900000	11300000	11400000	13900000	17700000	18500000	19900000
manA	MANNOSE-6-PHOSPHATE	MANNOSE-6-PHOSPHATE		4900000	4980000	5790000	6590000	5710000	5160000	4540000	5040000	4830000	5590000	5880000	6790000	10600000
map1	METHIONINE	METHIONINE		5740000	9880000	10400000	11300000	9660000	31500000	10900000	16300000	19900000	13900000	16400000	8610000	9660000
map2	METHIONINE	METHIONINE		1980000	772753	303289	2210000	966243	303989	644924	548668	1060000	965128	1760000	453992	388926
mcbR	TetR-type	TetR-type		1370000	1580000	1050000	2110000	1260000	1350000	886774	767884	1470000	2060000	953646	2660000	1570000
mcmA	METHYLMALONYL-COA	METHYLMALONYL-COA		15200000	8480000	6510000	6490000	9210000	7030000	10300000	6510000	8160000	6480000	6880000	7310000	6690000
mcmB	METHYLMALONYL-COA	METHYLMALONYL-COA		35300000	33800000	24800000	24100000	32300000	22800000	30100000	26700000	31400000	21800000	19800000	12100000	15700000
mdh	MALATE	MALATE		101000000	106000000	98500000	131000000	116000000	73500000	117000000	74200000	84400000	56700000	69500000	90100000	47800000
menB	DIHYDROXYNAPHTHONIC	DIHYDROXYNAPHTHONIC		994112	1600000	1200000	1420000	1240000	1040000	1490000	2150000	836950	1780000	1500000	1120000	1570000
menC	similar	similar		1470000	1460000	2970000	3530000	2340000	1860000	2110000	995528	1640000	1410000	1720000	3700000	2030000
menD	2-OXOGLUTARATE	2-OXOGLUTARATE					897460	2160000	6130000	4320000	2960000	4180000	6760000	3890000	2120000	1670000
merA	PUTATIVE	PUTATIVE		1530000	2630000	1130000	2140000	720697	689189	2360000	1560000	2450000	2890000	1790000	1150000	2690000
mesJ	ATPase	ATPase		739327			269276	473624	427191		386783	628909		464340	450832
metB	Cystathionine	Cystathionine		21500000	20800000	15000000	14000000	20900000	23700000	23500000	13900000	21400000	22300000	27100000	13500000	28400000
[truncated: 429 more rows]

## Sheet: -CGP3 log values (c)
Supplementary Table 5.c. Raw values and differential protein abundance during phage infection in -CGP3 cells. Log₂ fold changes represent mean differences between infected and non-infected samples calculated from three independent biological replicates (0_1-3 for t 0 min; 1_1-3 for t = 15 min 2_1-3 for t 30 min; 3_1-3 for t 60 min). Statistical significance (Student's T-test Significant_0/1/2/3) …
[truncated: 1,810 more rows]

[truncated: 1 more sheets: +CGP3 log values (d)]
